# Supplementary material for: Flood Prediction in Ungauged Basins by Physical-Based TOPKAPI Model
Source: Hindawi journal article supplement (doi:10.1155/2019/4795853), 2019-09-05
Supplement: f1 [file 4795853.f1.zip]

Archive with 22 entries (22 files):
- 4795853.f1/xx_Dtemp.csv.xyz
- 4795853.f1/xx_pre.csv.xyz
- 4795853.f1/xxdis_2003.csv
- 4795853.f1/xxdis_2004.csv
- 4795853.f1/xxdis_2005.csv
- 4795853.f1/xxdis_2006.csv
- 4795853.f1/xxdpre_2003.csv
- 4795853.f1/xxdpre_2004.csv
- 4795853.f1/xxdpre_2005.csv
- 4795853.f1/xxdpre_2006.csv
- 4795853.f1/xxdtemp_2003.csv
- 4795853.f1/xxdtemp_2004.csv
- 4795853.f1/xxdtemp_2005.csv
- 4795853.f1/xxdtemp_2006.csv
- 4795853.f1/xxpre_ele_2003.csv
- 4795853.f1/xxpre_ele_2004.csv
- 4795853.f1/xxpre_ele_2005.csv
- 4795853.f1/xxpre_ele_2006.csv
- 4795853.f1/xxTmonth_2003.csv
- 4795853.f1/xxTmonth_2004.csv
- 4795853.f1/xxTmonth_2005.csv
- 4795853.f1/xxTmonth_2006.csv
