# Supplementary material for: Flood Prediction in Ungauged Basins by Physical-Based TOPKAPI Model
Source: Hindawi journal article supplement (doi:10.1155/2019/4795853), 2019-09-05
Supplement: f1 [file 4795853.f1.zip › 4795853.f1/xx_Dtemp.csv.xyz]

X	Y	Z	CODE	NAME
176261.759	3607579.327	82.7	57290	ZhuMaDian
219719.658	3553207.343	114.5	57297	XinYang
