# Supplementary material for: Flood Prediction in Ungauged Basins by Physical-Based TOPKAPI Model
Source: Hindawi journal article supplement (doi:10.1155/2019/4795853), 2019-09-05
Supplement: f1 [file 4795853.f1.zip › 4795853.f1/xx_pre.csv.xyz]

X	Y	Z	CODE	NAME
161225.102	3586781.240	145	50220150	TongBai
180822.441	3610200.378	180	50220550	HuangGang
184589.400	3580469.551	140	50220700	HuJiaWan
194346.266	3591271.745	106	50220850	DaPoLing
223835.411	3579317.947	83	50221900	ChangTaiGuan
239866.811	3591839.063	61	50222450	XiaoCaoDiao
216936.718	3557309.444	82	50223650	NanWan
243726.339	3558447.880	62	50223900	WuLiDian
263316.852	3520989.621	77	50224350	DingYuanDian
249382.303	3532415.546	87	50224650	PengXinDian
273360.019	3546649.087	57	50224750	NanLiDian
267528.481	3567120.790	62	50225350	LuoShan
248616.890	3500996.287	85	50227850	XinXian
