# Supplementary material for: Flood Prediction in Ungauged Basins by Physical-Based TOPKAPI Model
Source: Hindawi journal article supplement (doi:10.1155/2019/4795853), 2019-09-05
Supplement: f1 [file 4795853.f1.zip › 4795853.f1/xxdis_2003.csv]

time	50100500
01/01/2003 00:00:00	31.2
01/01/2003 01:00:00	30.82130302
01/01/2003 02:00:00	30.45721807
01/01/2003 03:00:00	30.10742687
01/01/2003 04:00:00	29.77161114
01/01/2003 05:00:00	29.4494526
01/01/2003 06:00:00	29.14063299
01/01/2003 07:00:00	28.84483402
01/01/2003 08:00:00	28.56173741
01/01/2003 09:00:00	28.29102489
01/01/2003 10:00:00	28.03237819
01/01/2003 11:00:00	27.78547903
01/01/2003 12:00:00	27.55000912
01/01/2003 13:00:00	27.3256502
01/01/2003 14:00:00	27.11208399
01/01/2003 15:00:00	26.90899221
01/01/2003 16:00:00	26.71605658
01/01/2003 17:00:00	26.53295884
01/01/2003 18:00:00	26.35938069
01/01/2003 19:00:00	26.19500387
01/01/2003 20:00:00	26.0395101
01/01/2003 21:00:00	25.8925811
01/01/2003 22:00:00	25.7538986
01/01/2003 23:00:00	25.62314432
02/01/2003 00:00:00	25.49999998
02/01/2003 01:00:00	25.3841473
02/01/2003 02:00:00	25.27526802
02/01/2003 03:00:00	25.17304385
02/01/2003 04:00:00	25.07715652
02/01/2003 05:00:00	24.98728775
02/01/2003 06:00:00	24.90311926
02/01/2003 07:00:00	24.82433279
02/01/2003 08:00:00	24.75061004
02/01/2003 09:00:00	24.68163275
02/01/2003 10:00:00	24.61708264
02/01/2003 11:00:00	24.55664142
02/01/2003 12:00:00	24.49999084
02/01/2003 13:00:00	24.4468126
02/01/2003 14:00:00	24.39678844
02/01/2003 15:00:00	24.34960007
02/01/2003 16:00:00	24.30492923
02/01/2003 17:00:00	24.26245762
02/01/2003 18:00:00	24.22186698
02/01/2003 19:00:00	24.18283904
02/01/2003 20:00:00	24.14505551
02/01/2003 21:00:00	24.10819811
02/01/2003 22:00:00	24.07194858
02/01/2003 23:00:00	24.03598863
03/01/2003 00:00:00	23.99999999
03/01/2003 01:00:00	23.96372947
03/01/2003 02:00:00	23.92718427
03/01/2003 03:00:00	23.89043667
03/01/2003 04:00:00	23.85355896
03/01/2003 05:00:00	23.81662343
03/01/2003 06:00:00	23.77970234
03/01/2003 07:00:00	23.74286801
03/01/2003 08:00:00	23.70619269
03/01/2003 09:00:00	23.66974869
03/01/2003 10:00:00	23.63360829
03/01/2003 11:00:00	23.59784377
03/01/2003 12:00:00	23.56252742
03/01/2003 13:00:00	23.52773152
03/01/2003 14:00:00	23.49352835
03/01/2003 15:00:00	23.45999021
03/01/2003 16:00:00	23.42718938
03/01/2003 17:00:00	23.39519814
03/01/2003 18:00:00	23.36408878
03/01/2003 19:00:00	23.33393358
03/01/2003 20:00:00	23.30480482
03/01/2003 21:00:00	23.2767748
03/01/2003 22:00:00	23.2499158
03/01/2003 23:00:00	23.2243001
04/01/2003 00:00:00	23.19999999
04/01/2003 01:00:00	23.17708056
04/01/2003 02:00:00	23.15557813
04/01/2003 03:00:00	23.13552186
04/01/2003 04:00:00	23.11694086
04/01/2003 05:00:00	23.09986429
04/01/2003 06:00:00	23.08432126
04/01/2003 07:00:00	23.07034093
04/01/2003 08:00:00	23.05795243
04/01/2003 09:00:00	23.04718488
04/01/2003 10:00:00	23.03806744
04/01/2003 11:00:00	23.03062924
04/01/2003 12:00:00	23.0248994
04/01/2003 13:00:00	23.02090707
04/01/2003 14:00:00	23.01868139
04/01/2003 15:00:00	23.01825149
04/01/2003 16:00:00	23.01964651
04/01/2003 17:00:00	23.02289558
04/01/2003 18:00:00	23.02802784
04/01/2003 19:00:00	23.03507242
04/01/2003 20:00:00	23.04405847
04/01/2003 21:00:00	23.05501512
04/01/2003 22:00:00	23.0679715
04/01/2003 23:00:00	23.08295675
05/01/2003 00:00:00	23.10000001
05/01/2003 01:00:00	23.11917366
05/01/2003 02:00:00	23.14072306
05/01/2003 03:00:00	23.16493679
05/01/2003 04:00:00	23.19210348
05/01/2003 05:00:00	23.2225117
05/01/2003 06:00:00	23.25645008
05/01/2003 07:00:00	23.2942072
05/01/2003 08:00:00	23.33607167
05/01/2003 09:00:00	23.38233208
05/01/2003 10:00:00	23.43327704
05/01/2003 11:00:00	23.48919515
05/01/2003 12:00:00	23.550375
05/01/2003 13:00:00	23.61710521
05/01/2003 14:00:00	23.68967436
05/01/2003 15:00:00	23.76837106
05/01/2003 16:00:00	23.85348392
05/01/2003 17:00:00	23.94530152
05/01/2003 18:00:00	24.04411247
05/01/2003 19:00:00	24.15020537
05/01/2003 20:00:00	24.26386882
05/01/2003 21:00:00	24.38539143
05/01/2003 22:00:00	24.51506178
05/01/2003 23:00:00	24.65316849
06/01/2003 00:00:00	24.80000015
06/01/2003 01:00:00	24.95567957
06/01/2003 02:00:00	25.11966644
06/01/2003 03:00:00	25.29125465
06/01/2003 04:00:00	25.46973809
06/01/2003 05:00:00	25.65441065
06/01/2003 06:00:00	25.84456622
06/01/2003 07:00:00	26.03949871
06/01/2003 08:00:00	26.238502
06/01/2003 09:00:00	26.44086998
06/01/2003 10:00:00	26.64589655
06/01/2003 11:00:00	26.8528756
06/01/2003 12:00:00	27.06110102
06/01/2003 13:00:00	27.26986671
06/01/2003 14:00:00	27.47846655
06/01/2003 15:00:00	27.68619445
06/01/2003 16:00:00	27.8923443
06/01/2003 17:00:00	28.09620998
06/01/2003 18:00:00	28.29708539
06/01/2003 19:00:00	28.49426442
06/01/2003 20:00:00	28.68704097
06/01/2003 21:00:00	28.87470893
06/01/2003 22:00:00	29.05656219
06/01/2003 23:00:00	29.23189465
07/01/2003 00:00:00	29.40000019
07/01/2003 01:00:00	29.56032241
07/01/2003 02:00:00	29.71290369
07/01/2003 03:00:00	29.85793611
07/01/2003 04:00:00	29.99561174
07/01/2003 05:00:00	30.12612267
07/01/2003 06:00:00	30.24966097
07/01/2003 07:00:00	30.36641872
07/01/2003 08:00:00	30.476588
07/01/2003 09:00:00	30.58036089
07/01/2003 10:00:00	30.67792946
07/01/2003 11:00:00	30.76948579
07/01/2003 12:00:00	30.85522196
07/01/2003 13:00:00	30.93533005
07/01/2003 14:00:00	31.01000214
07/01/2003 15:00:00	31.07943031
07/01/2003 16:00:00	31.14380662
07/01/2003 17:00:00	31.20332317
07/01/2003 18:00:00	31.25817203
07/01/2003 19:00:00	31.30854527
07/01/2003 20:00:00	31.35463498
07/01/2003 21:00:00	31.39663323
07/01/2003 22:00:00	31.43473211
07/01/2003 23:00:00	31.46912369
08/01/2003 00:00:00	31.50000004
08/01/2003 01:00:00	31.52752534
08/01/2003 02:00:00	31.55175209
08/01/2003 03:00:00	31.5727049
08/01/2003 04:00:00	31.59040836
08/01/2003 05:00:00	31.60488709
08/01/2003 06:00:00	31.61616567
08/01/2003 07:00:00	31.6242687
08/01/2003 08:00:00	31.6292208
08/01/2003 09:00:00	31.63104655
08/01/2003 10:00:00	31.62977056
08/01/2003 11:00:00	31.62541743
08/01/2003 12:00:00	31.61801175
08/01/2003 13:00:00	31.60757814
08/01/2003 14:00:00	31.59414119
08/01/2003 15:00:00	31.57772549
08/01/2003 16:00:00	31.55835565
08/01/2003 17:00:00	31.53605628
08/01/2003 18:00:00	31.51085196
08/01/2003 19:00:00	31.4827673
08/01/2003 20:00:00	31.45182691
08/01/2003 21:00:00	31.41805537
08/01/2003 22:00:00	31.3814773
08/01/2003 23:00:00	31.34211729
09/01/2003 00:00:00	31.29999993
09/01/2003 01:00:00	31.25521307
09/01/2003 02:00:00	31.20809744
09/01/2003 03:00:00	31.15905699
09/01/2003 04:00:00	31.10849571
09/01/2003 05:00:00	31.05681755
09/01/2003 06:00:00	31.00442648
09/01/2003 07:00:00	30.95172647
09/01/2003 08:00:00	30.89912147
09/01/2003 09:00:00	30.84701546
09/01/2003 10:00:00	30.7958124
09/01/2003 11:00:00	30.74591626
09/01/2003 12:00:00	30.69773099
09/01/2003 13:00:00	30.65166058
09/01/2003 14:00:00	30.60810898
09/01/2003 15:00:00	30.56748015
09/01/2003 16:00:00	30.53017807
09/01/2003 17:00:00	30.4966067
09/01/2003 18:00:00	30.46717
09/01/2003 19:00:00	30.44227194
09/01/2003 20:00:00	30.42231648
09/01/2003 21:00:00	30.40770759
09/01/2003 22:00:00	30.39884924
09/01/2003 23:00:00	30.3961454
10/01/2003 00:00:00	30.40000001
10/01/2003 01:00:00	30.41069334
10/01/2003 02:00:00	30.42801071
10/01/2003 03:00:00	30.45161376
10/01/2003 04:00:00	30.48116411
10/01/2003 05:00:00	30.51632337
10/01/2003 06:00:00	30.55675317
10/01/2003 07:00:00	30.60211513
10/01/2003 08:00:00	30.65207087
10/01/2003 09:00:00	30.70628201
10/01/2003 10:00:00	30.76441018
10/01/2003 11:00:00	30.82611699
10/01/2003 12:00:00	30.89106407
10/01/2003 13:00:00	30.95891304
10/01/2003 14:00:00	31.02932552
10/01/2003 15:00:00	31.10196313
10/01/2003 16:00:00	31.1764875
10/01/2003 17:00:00	31.25256024
10/01/2003 18:00:00	31.32984298
10/01/2003 19:00:00	31.40799734
10/01/2003 20:00:00	31.48668493
10/01/2003 21:00:00	31.56556739
10/01/2003 22:00:00	31.64430633
10/01/2003 23:00:00	31.72256338
11/01/2003 00:00:00	31.80000015
11/01/2003 01:00:00	31.87644229
11/01/2003 02:00:00	31.9523715
11/01/2003 03:00:00	32.02843353
11/01/2003 04:00:00	32.10527409
11/01/2003 05:00:00	32.18353891
11/01/2003 06:00:00	32.26387373
11/01/2003 07:00:00	32.34692427
11/01/2003 08:00:00	32.43333627
11/01/2003 09:00:00	32.52375544
11/01/2003 10:00:00	32.61882753
11/01/2003 11:00:00	32.71919826
11/01/2003 12:00:00	32.82551335
11/01/2003 13:00:00	32.93841854
11/01/2003 14:00:00	33.05855955
11/01/2003 15:00:00	33.18658212
11/01/2003 16:00:00	33.32313198
11/01/2003 17:00:00	33.46885485
11/01/2003 18:00:00	33.62439645
11/01/2003 19:00:00	33.79040253
11/01/2003 20:00:00	33.96751881
11/01/2003 21:00:00	34.15639102
11/01/2003 22:00:00	34.35766488
11/01/2003 23:00:00	34.57198613
12/01/2003 00:00:00	34.8000005
12/01/2003 01:00:00	35.04190816
12/01/2003 02:00:00	35.29612714
12/01/2003 03:00:00	35.56062991
12/01/2003 04:00:00	35.83338895
12/01/2003 05:00:00	36.11237674
12/01/2003 06:00:00	36.39556574
12/01/2003 07:00:00	36.68092845
12/01/2003 08:00:00	36.96643732
12/01/2003 09:00:00	37.25006485
12/01/2003 10:00:00	37.52978351
12/01/2003 11:00:00	37.80356577
12/01/2003 12:00:00	38.06938411
12/01/2003 13:00:00	38.32521101
12/01/2003 14:00:00	38.56901895
12/01/2003 15:00:00	38.79878039
12/01/2003 16:00:00	39.01246782
12/01/2003 17:00:00	39.20805372
12/01/2003 18:00:00	39.38351055
12/01/2003 19:00:00	39.5368108
12/01/2003 20:00:00	39.66592695
12/01/2003 21:00:00	39.76883146
12/01/2003 22:00:00	39.84349682
12/01/2003 23:00:00	39.88789551
13/01/2003 00:00:00	39.89999999
13/01/2003 01:00:00	39.87845328
13/01/2003 02:00:00	39.82458046
13/01/2003 03:00:00	39.74037717
13/01/2003 04:00:00	39.627839
13/01/2003 05:00:00	39.48896157
13/01/2003 06:00:00	39.32574051
13/01/2003 07:00:00	39.14017142
13/01/2003 08:00:00	38.93424991
13/01/2003 09:00:00	38.70997161
13/01/2003 10:00:00	38.46933212
13/01/2003 11:00:00	38.21432707
13/01/2003 12:00:00	37.94695207
13/01/2003 13:00:00	37.66920272
13/01/2003 14:00:00	37.38307465
13/01/2003 15:00:00	37.09056348
13/01/2003 16:00:00	36.7936648
13/01/2003 17:00:00	36.49437425
13/01/2003 18:00:00	36.19468743
13/01/2003 19:00:00	35.89659996
13/01/2003 20:00:00	35.60210746
13/01/2003 21:00:00	35.31320553
13/01/2003 22:00:00	35.0318898
13/01/2003 23:00:00	34.76015587
14/01/2003 00:00:00	34.49999937
14/01/2003 01:00:00	34.25295163
14/01/2003 02:00:00	34.01868691
14/01/2003 03:00:00	33.79641522
14/01/2003 04:00:00	33.58534654
14/01/2003 05:00:00	33.38469088
14/01/2003 06:00:00	33.19365822
14/01/2003 07:00:00	33.01145857
14/01/2003 08:00:00	32.83730192
14/01/2003 09:00:00	32.67039825
14/01/2003 10:00:00	32.50995758
14/01/2003 11:00:00	32.3551899
14/01/2003 12:00:00	32.20530519
14/01/2003 13:00:00	32.05951346
14/01/2003 14:00:00	31.91702471
14/01/2003 15:00:00	31.77704892
14/01/2003 16:00:00	31.63879609
14/01/2003 17:00:00	31.50147622
14/01/2003 18:00:00	31.3642993
14/01/2003 19:00:00	31.22647534
14/01/2003 20:00:00	31.08721431
14/01/2003 21:00:00	30.94572623
14/01/2003 22:00:00	30.80122109
14/01/2003 23:00:00	30.65290887
15/01/2003 00:00:00	30.49999958
15/01/2003 01:00:00	30.34200725
15/01/2003 02:00:00	30.17966204
15/01/2003 03:00:00	30.01399815
15/01/2003 04:00:00	29.84604977
15/01/2003 05:00:00	29.6768511
15/01/2003 06:00:00	29.50743633
15/01/2003 07:00:00	29.33883965
15/01/2003 08:00:00	29.17209527
15/01/2003 09:00:00	29.00823738
15/01/2003 10:00:00	28.84830017
15/01/2003 11:00:00	28.69331783
15/01/2003 12:00:00	28.54432457
15/01/2003 13:00:00	28.40235458
15/01/2003 14:00:00	28.26844204
15/01/2003 15:00:00	28.14362117
15/01/2003 16:00:00	28.02892614
15/01/2003 17:00:00	27.92539117
15/01/2003 18:00:00	27.83405043
15/01/2003 19:00:00	27.75593814
15/01/2003 20:00:00	27.69208847
15/01/2003 21:00:00	27.64353563
15/01/2003 22:00:00	27.61131382
15/01/2003 23:00:00	27.59645722
16/01/2003 00:00:00	27.60000004
16/01/2003 01:00:00	27.62247054
16/01/2003 02:00:00	27.66237336
16/01/2003 03:00:00	27.71770719
16/01/2003 04:00:00	27.78647075
16/01/2003 05:00:00	27.86666276
16/01/2003 06:00:00	27.95628191
16/01/2003 07:00:00	28.05332693
16/01/2003 08:00:00	28.15579652
16/01/2003 09:00:00	28.2616894
16/01/2003 10:00:00	28.36900426
16/01/2003 11:00:00	28.47573984
16/01/2003 12:00:00	28.57989482
16/01/2003 13:00:00	28.67946794
16/01/2003 14:00:00	28.77245789
16/01/2003 15:00:00	28.85686338
16/01/2003 16:00:00	28.93068314
16/01/2003 17:00:00	28.99191586
16/01/2003 18:00:00	29.03856026
16/01/2003 19:00:00	29.06861505
16/01/2003 20:00:00	29.08007894
16/01/2003 21:00:00	29.07095064
16/01/2003 22:00:00	29.03922886
16/01/2003 23:00:00	28.98291231
17/01/2003 00:00:00	28.8999997
17/01/2003 01:00:00	28.78915324
17/01/2003 02:00:00	28.65168909
17/01/2003 03:00:00	28.48958689
17/01/2003 04:00:00	28.30482629
17/01/2003 05:00:00	28.09938692
17/01/2003 06:00:00	27.87524843
17/01/2003 07:00:00	27.63439046
17/01/2003 08:00:00	27.37879267
17/01/2003 09:00:00	27.11043468
17/01/2003 10:00:00	26.83129614
17/01/2003 11:00:00	26.5433567
17/01/2003 12:00:00	26.248596
17/01/2003 13:00:00	25.94899368
17/01/2003 14:00:00	25.64652939
17/01/2003 15:00:00	25.34318276
17/01/2003 16:00:00	25.04093344
17/01/2003 17:00:00	24.74176108
17/01/2003 18:00:00	24.44764532
17/01/2003 19:00:00	24.1605658
17/01/2003 20:00:00	23.88250216
17/01/2003 21:00:00	23.61543405
17/01/2003 22:00:00	23.36134111
17/01/2003 23:00:00	23.12220298
18/01/2003 00:00:00	22.8999993
18/01/2003 01:00:00	22.69623993
18/01/2003 02:00:00	22.51055548
18/01/2003 03:00:00	22.34210681
18/01/2003 04:00:00	22.19005475
18/01/2003 05:00:00	22.05356016
18/01/2003 06:00:00	21.93178386
18/01/2003 07:00:00	21.82388671
18/01/2003 08:00:00	21.72902954
18/01/2003 09:00:00	21.6463732
18/01/2003 10:00:00	21.57507852
18/01/2003 11:00:00	21.51430636
18/01/2003 12:00:00	21.46321756
18/01/2003 13:00:00	21.42097295
18/01/2003 14:00:00	21.38673337
18/01/2003 15:00:00	21.35965968
18/01/2003 16:00:00	21.33891271
18/01/2003 17:00:00	21.3236533
18/01/2003 18:00:00	21.3130423
18/01/2003 19:00:00	21.30624055
18/01/2003 20:00:00	21.30240889
18/01/2003 21:00:00	21.30070816
18/01/2003 22:00:00	21.30029921
18/01/2003 23:00:00	21.30034287
19/01/2003 00:00:00	21.3
19/01/2003 01:00:00	21.298591
19/01/2003 02:00:00	21.29607462
19/01/2003 03:00:00	21.29256916
19/01/2003 04:00:00	21.28819292
19/01/2003 05:00:00	21.28306422
19/01/2003 06:00:00	21.27730137
19/01/2003 07:00:00	21.27102266
19/01/2003 08:00:00	21.26434642
19/01/2003 09:00:00	21.25739094
19/01/2003 10:00:00	21.25027454
19/01/2003 11:00:00	21.24311551
19/01/2003 12:00:00	21.23603218
19/01/2003 13:00:00	21.22914285
19/01/2003 14:00:00	21.22256582
19/01/2003 15:00:00	21.2164194
19/01/2003 16:00:00	21.21082191
19/01/2003 17:00:00	21.20589164
19/01/2003 18:00:00	21.20174691
19/01/2003 19:00:00	21.19850602
19/01/2003 20:00:00	21.19628729
19/01/2003 21:00:00	21.19520901
19/01/2003 22:00:00	21.1953895
19/01/2003 23:00:00	21.19694707
20/01/2003 00:00:00	21.20000001
20/01/2003 01:00:00	21.20462835
20/01/2003 02:00:00	21.21075887
20/01/2003 03:00:00	21.21828008
20/01/2003 04:00:00	21.22708046
20/01/2003 05:00:00	21.23704852
20/01/2003 06:00:00	21.24807275
20/01/2003 07:00:00	21.26004164
20/01/2003 08:00:00	21.2728437
20/01/2003 09:00:00	21.28636742
20/01/2003 10:00:00	21.3005013
20/01/2003 11:00:00	21.31513383
20/01/2003 12:00:00	21.33015351
20/01/2003 13:00:00	21.34544884
20/01/2003 14:00:00	21.36090831
20/01/2003 15:00:00	21.37642042
20/01/2003 16:00:00	21.39187366
20/01/2003 17:00:00	21.40715654
20/01/2003 18:00:00	21.42215754
20/01/2003 19:00:00	21.43676517
20/01/2003 20:00:00	21.45086791
20/01/2003 21:00:00	21.46435428
20/01/2003 22:00:00	21.47711276
20/01/2003 23:00:00	21.48903185
21/01/2003 00:00:00	21.50000004
21/01/2003 01:00:00	21.50996457
21/01/2003 02:00:00	21.51910761
21/01/2003 03:00:00	21.52767005
21/01/2003 04:00:00	21.5358928
21/01/2003 05:00:00	21.54401676
21/01/2003 06:00:00	21.55228283
21/01/2003 07:00:00	21.56093191
21/01/2003 08:00:00	21.5702049
21/01/2003 09:00:00	21.58034271
21/01/2003 10:00:00	21.59158623
21/01/2003 11:00:00	21.60417637
21/01/2003 12:00:00	21.61835402
21/01/2003 13:00:00	21.63436009
21/01/2003 14:00:00	21.65243548
21/01/2003 15:00:00	21.6728211
21/01/2003 16:00:00	21.69575783
21/01/2003 17:00:00	21.72148658
21/01/2003 18:00:00	21.75024826
21/01/2003 19:00:00	21.78228377
21/01/2003 20:00:00	21.817834
21/01/2003 21:00:00	21.85713986
21/01/2003 22:00:00	21.90044225
21/01/2003 23:00:00	21.94798207
22/01/2003 00:00:00	22.00000022
22/01/2003 01:00:00	22.05659884
22/01/2003 02:00:00	22.117325
22/01/2003 03:00:00	22.18158702
22/01/2003 04:00:00	22.24879321
22/01/2003 05:00:00	22.3183519
22/01/2003 06:00:00	22.3896714
22/01/2003 07:00:00	22.46216001
22/01/2003 08:00:00	22.53522607
22/01/2003 09:00:00	22.60827788
22/01/2003 10:00:00	22.68072375
22/01/2003 11:00:00	22.75197202
22/01/2003 12:00:00	22.82143098
22/01/2003 13:00:00	22.88850896
22/01/2003 14:00:00	22.95261426
22/01/2003 15:00:00	23.01315522
22/01/2003 16:00:00	23.06954014
22/01/2003 17:00:00	23.12117733
22/01/2003 18:00:00	23.16747512
22/01/2003 19:00:00	23.20784182
22/01/2003 20:00:00	23.24168574
22/01/2003 21:00:00	23.26841521
22/01/2003 22:00:00	23.28743852
22/01/2003 23:00:00	23.29816401
23/01/2003 00:00:00	23.29999999
23/01/2003 01:00:00	23.29256897
23/01/2003 02:00:00	23.27635031
23/01/2003 03:00:00	23.25203755
23/01/2003 04:00:00	23.22032423
23/01/2003 05:00:00	23.18190389
23/01/2003 06:00:00	23.13747009
23/01/2003 07:00:00	23.08771636
23/01/2003 08:00:00	23.03333626
23/01/2003 09:00:00	22.97502333
23/01/2003 10:00:00	22.9134711
23/01/2003 11:00:00	22.84937313
23/01/2003 12:00:00	22.78342297
23/01/2003 13:00:00	22.71631415
23/01/2003 14:00:00	22.64874022
23/01/2003 15:00:00	22.58139473
23/01/2003 16:00:00	22.51497122
23/01/2003 17:00:00	22.45016324
23/01/2003 18:00:00	22.38766433
23/01/2003 19:00:00	22.32816803
23/01/2003 20:00:00	22.2723679
23/01/2003 21:00:00	22.22095747
23/01/2003 22:00:00	22.17463029
23/01/2003 23:00:00	22.13407991
24/01/2003 00:00:00	22.09999986
24/01/2003 01:00:00	22.07279244
24/01/2003 02:00:00	22.05169488
24/01/2003 03:00:00	22.03565314
24/01/2003 04:00:00	22.02361322
24/01/2003 05:00:00	22.01452108
24/01/2003 06:00:00	22.0073227
24/01/2003 07:00:00	22.00096407
24/01/2003 08:00:00	21.99439115
24/01/2003 09:00:00	21.98654992
24/01/2003 10:00:00	21.97638637
24/01/2003 11:00:00	21.96284647
24/01/2003 12:00:00	21.94487619
24/01/2003 13:00:00	21.92142151
24/01/2003 14:00:00	21.89142841
24/01/2003 15:00:00	21.85384287
24/01/2003 16:00:00	21.80761086
24/01/2003 17:00:00	21.75167837
24/01/2003 18:00:00	21.68499136
24/01/2003 19:00:00	21.60649581
24/01/2003 20:00:00	21.51513771
24/01/2003 21:00:00	21.40986302
24/01/2003 22:00:00	21.28961773
24/01/2003 23:00:00	21.15334782
25/01/2003 00:00:00	20.99999925
25/01/2003 01:00:00	20.82937483
25/01/2003 02:00:00	20.64470453
25/01/2003 03:00:00	20.45007516
25/01/2003 04:00:00	20.24957348
25/01/2003 05:00:00	20.04728629
25/01/2003 06:00:00	19.84730036
25/01/2003 07:00:00	19.65370248
25/01/2003 08:00:00	19.47057943
25/01/2003 09:00:00	19.302018
25/01/2003 10:00:00	19.15210496
25/01/2003 11:00:00	19.02492711
25/01/2003 12:00:00	18.92457122
25/01/2003 13:00:00	18.85512408
25/01/2003 14:00:00	18.82067247
25/01/2003 15:00:00	18.82530317
25/01/2003 16:00:00	18.87310297
25/01/2003 17:00:00	18.96815864
25/01/2003 18:00:00	19.11455698
25/01/2003 19:00:00	19.31638477
25/01/2003 20:00:00	19.57772878
25/01/2003 21:00:00	19.90267581
25/01/2003 22:00:00	20.29531263
25/01/2003 23:00:00	20.75972602
26/01/2003 00:00:00	21.30000278
26/01/2003 01:00:00	21.9184175
26/01/2003 02:00:00	22.60999614
26/01/2003 03:00:00	23.36795255
26/01/2003 04:00:00	24.18550056
26/01/2003 05:00:00	25.055854
26/01/2003 06:00:00	25.9722267
26/01/2003 07:00:00	26.92783251
26/01/2003 08:00:00	27.91588526
26/01/2003 09:00:00	28.92959879
26/01/2003 10:00:00	29.96218692
26/01/2003 11:00:00	31.00686351
26/01/2003 12:00:00	32.05684237
26/01/2003 13:00:00	33.10533735
26/01/2003 14:00:00	34.14556228
26/01/2003 15:00:00	35.17073099
26/01/2003 16:00:00	36.17405733
26/01/2003 17:00:00	37.14875513
26/01/2003 18:00:00	38.08803822
26/01/2003 19:00:00	38.98512044
26/01/2003 20:00:00	39.83321563
26/01/2003 21:00:00	40.62553761
26/01/2003 22:00:00	41.35530023
26/01/2003 23:00:00	42.01571732
27/01/2003 00:00:00	42.60000272
27/01/2003 01:00:00	43.1029444
27/01/2003 02:00:00	43.52562684
27/01/2003 03:00:00	43.8707086
27/01/2003 04:00:00	44.14084827
27/01/2003 05:00:00	44.3387044
27/01/2003 06:00:00	44.46693556
27/01/2003 07:00:00	44.52820033
27/01/2003 08:00:00	44.52515727
27/01/2003 09:00:00	44.46046495
27/01/2003 10:00:00	44.33678195
27/01/2003 11:00:00	44.15676683
27/01/2003 12:00:00	43.92307816
27/01/2003 13:00:00	43.6383745
27/01/2003 14:00:00	43.30531444
27/01/2003 15:00:00	42.92655654
27/01/2003 16:00:00	42.50475936
27/01/2003 17:00:00	42.04258148
27/01/2003 18:00:00	41.54268147
27/01/2003 19:00:00	41.00771789
27/01/2003 20:00:00	40.44034932
27/01/2003 21:00:00	39.84323432
27/01/2003 22:00:00	39.21903147
27/01/2003 23:00:00	38.57039933
28/01/2003 00:00:00	37.89999647
28/01/2003 01:00:00	37.21047485
28/01/2003 02:00:00	36.50445999
28/01/2003 03:00:00	35.78457078
28/01/2003 04:00:00	35.05342612
28/01/2003 05:00:00	34.31364493
28/01/2003 06:00:00	33.56784609
28/01/2003 07:00:00	32.81864851
28/01/2003 08:00:00	32.06867109
28/01/2003 09:00:00	31.32053273
28/01/2003 10:00:00	30.57685234
28/01/2003 11:00:00	29.84024882
28/01/2003 12:00:00	29.11334106
28/01/2003 13:00:00	28.39874797
28/01/2003 14:00:00	27.69908845
28/01/2003 15:00:00	27.0169814
28/01/2003 16:00:00	26.35504573
28/01/2003 17:00:00	25.71590033
28/01/2003 18:00:00	25.1021641
28/01/2003 19:00:00	24.51645596
28/01/2003 20:00:00	23.96139479
28/01/2003 21:00:00	23.4395995
28/01/2003 22:00:00	22.95368899
28/01/2003 23:00:00	22.50628217
29/01/2003 00:00:00	22.09999793
29/01/2003 01:00:00	21.73666704
29/01/2003 02:00:00	21.41496773
29/01/2003 03:00:00	21.13279015
29/01/2003 04:00:00	20.88802442
29/01/2003 05:00:00	20.67856068
29/01/2003 06:00:00	20.50228905
29/01/2003 07:00:00	20.35709966
29/01/2003 08:00:00	20.24088265
29/01/2003 09:00:00	20.15152815
29/01/2003 10:00:00	20.08692628
29/01/2003 11:00:00	20.04496719
29/01/2003 12:00:00	20.02354099
29/01/2003 13:00:00	20.02053782
29/01/2003 14:00:00	20.03384781
29/01/2003 15:00:00	20.06136109
29/01/2003 16:00:00	20.1009678
29/01/2003 17:00:00	20.15055806
29/01/2003 18:00:00	20.208022
29/01/2003 19:00:00	20.27124975
29/01/2003 20:00:00	20.33813145
29/01/2003 21:00:00	20.40655723
29/01/2003 22:00:00	20.47441721
29/01/2003 23:00:00	20.53960153
30/01/2003 00:00:00	20.60000032
30/01/2003 01:00:00	20.65389229
30/01/2003 02:00:00	20.7011105
30/01/2003 03:00:00	20.74187655
30/01/2003 04:00:00	20.77641206
30/01/2003 05:00:00	20.80493865
30/01/2003 06:00:00	20.82767794
30/01/2003 07:00:00	20.84485154
30/01/2003 08:00:00	20.85668108
30/01/2003 09:00:00	20.86338816
30/01/2003 10:00:00	20.86519441
30/01/2003 11:00:00	20.86232144
30/01/2003 12:00:00	20.85499087
30/01/2003 13:00:00	20.84342431
30/01/2003 14:00:00	20.82784339
30/01/2003 15:00:00	20.80846972
30/01/2003 16:00:00	20.78552492
30/01/2003 17:00:00	20.7592306
30/01/2003 18:00:00	20.72980838
30/01/2003 19:00:00	20.69747988
30/01/2003 20:00:00	20.66246671
30/01/2003 21:00:00	20.6249905
30/01/2003 22:00:00	20.58527285
30/01/2003 23:00:00	20.5435354
31/01/2003 00:00:00	20.49999974
31/01/2003 01:00:00	20.45499661
31/01/2003 02:00:00	20.40929307
31/01/2003 03:00:00	20.36376532
31/01/2003 04:00:00	20.31928953
31/01/2003 05:00:00	20.27674188
31/01/2003 06:00:00	20.23699854
31/01/2003 07:00:00	20.20093571
31/01/2003 08:00:00	20.16942955
31/01/2003 09:00:00	20.14335625
31/01/2003 10:00:00	20.12359198
31/01/2003 11:00:00	20.11101292
31/01/2003 12:00:00	20.10649526
31/01/2003 13:00:00	20.11091517
31/01/2003 14:00:00	20.12514883
31/01/2003 15:00:00	20.15007241
31/01/2003 16:00:00	20.18656211
31/01/2003 17:00:00	20.23549409
31/01/2003 18:00:00	20.29774453
31/01/2003 19:00:00	20.37418963
31/01/2003 20:00:00	20.46570554
31/01/2003 21:00:00	20.57316846
31/01/2003 22:00:00	20.69745456
31/01/2003 23:00:00	20.83944002
01/02/2003 00:00:00	21.00000101
01/02/2003 01:00:00	21.17976024
01/02/2003 02:00:00	21.37832644
01/02/2003 03:00:00	21.59505487
01/02/2003 04:00:00	21.82930081
01/02/2003 05:00:00	22.08041952
01/02/2003 06:00:00	22.34776626
01/02/2003 07:00:00	22.6306963
01/02/2003 08:00:00	22.92856489
01/02/2003 09:00:00	23.24072732
01/02/2003 10:00:00	23.56653883
01/02/2003 11:00:00	23.9053547
01/02/2003 12:00:00	24.25653019
01/02/2003 13:00:00	24.61942057
01/02/2003 14:00:00	24.99338109
01/02/2003 15:00:00	25.37776703
01/02/2003 16:00:00	25.77193365
01/02/2003 17:00:00	26.17523621
01/02/2003 18:00:00	26.58702998
01/02/2003 19:00:00	27.00667022
01/02/2003 20:00:00	27.4335122
01/02/2003 21:00:00	27.86691118
01/02/2003 22:00:00	28.30622242
01/02/2003 23:00:00	28.7508012
02/02/2003 00:00:00	29.20000277
02/02/2003 01:00:00	29.65306005
02/02/2003 02:00:00	30.10871656
02/02/2003 03:00:00	30.56559345
02/02/2003 04:00:00	31.02231189
02/02/2003 05:00:00	31.47749305
02/02/2003 06:00:00	31.92975809
02/02/2003 07:00:00	32.37772817
02/02/2003 08:00:00	32.82002447
02/02/2003 09:00:00	33.25526815
02/02/2003 10:00:00	33.68208037
02/02/2003 11:00:00	34.0990823
02/02/2003 12:00:00	34.5048951
02/02/2003 13:00:00	34.89813994
02/02/2003 14:00:00	35.27743798
02/02/2003 15:00:00	35.64141039
02/02/2003 16:00:00	35.98867834
02/02/2003 17:00:00	36.31786298
02/02/2003 18:00:00	36.62758549
02/02/2003 19:00:00	36.91646703
02/02/2003 20:00:00	37.18312876
02/02/2003 21:00:00	37.42619186
02/02/2003 22:00:00	37.64427748
02/02/2003 23:00:00	37.83600678
03/02/2003 00:00:00	38.00000095
03/02/2003 01:00:00	38.13535638
03/02/2003 02:00:00	38.24307042
03/02/2003 03:00:00	38.32461565
03/02/2003 04:00:00	38.38146464
03/02/2003 05:00:00	38.41508997
03/02/2003 06:00:00	38.42696421
03/02/2003 07:00:00	38.41855993
03/02/2003 08:00:00	38.39134972
03/02/2003 09:00:00	38.34680614
03/02/2003 10:00:00	38.28640177
03/02/2003 11:00:00	38.21160918
03/02/2003 12:00:00	38.12390095
03/02/2003 13:00:00	38.02474965
03/02/2003 14:00:00	37.91562786
03/02/2003 15:00:00	37.79800815
03/02/2003 16:00:00	37.67336309
03/02/2003 17:00:00	37.54316527
03/02/2003 18:00:00	37.40888725
03/02/2003 19:00:00	37.2720016
03/02/2003 20:00:00	37.13398092
03/02/2003 21:00:00	36.99629776
03/02/2003 22:00:00	36.8604247
03/02/2003 23:00:00	36.72783432
04/02/2003 00:00:00	36.59999918
04/02/2003 01:00:00	36.4779877
04/02/2003 02:00:00	36.3612516
04/02/2003 03:00:00	36.24883843
04/02/2003 04:00:00	36.13979577
04/02/2003 05:00:00	36.03317117
04/02/2003 06:00:00	35.92801221
04/02/2003 07:00:00	35.82336645
04/02/2003 08:00:00	35.71828145
04/02/2003 09:00:00	35.61180479
04/02/2003 10:00:00	35.50298401
04/02/2003 11:00:00	35.3908667
04/02/2003 12:00:00	35.2745004
04/02/2003 13:00:00	35.1529327
04/02/2003 14:00:00	35.02521115
04/02/2003 15:00:00	34.89038331
04/02/2003 16:00:00	34.74749676
04/02/2003 17:00:00	34.59559906
04/02/2003 18:00:00	34.43373777
04/02/2003 19:00:00	34.26096046
04/02/2003 20:00:00	34.07631468
04/02/2003 21:00:00	33.87884802
04/02/2003 22:00:00	33.66760803
04/02/2003 23:00:00	33.44164227
05/02/2003 00:00:00	33.19999832
05/02/2003 01:00:00	32.94210563
05/02/2003 02:00:00	32.66892123
05/02/2003 03:00:00	32.38178401
05/02/2003 04:00:00	32.08203288
05/02/2003 05:00:00	31.77100674
05/02/2003 06:00:00	31.45004449
05/02/2003 07:00:00	31.12048504
05/02/2003 08:00:00	30.78366729
05/02/2003 09:00:00	30.44093013
05/02/2003 10:00:00	30.09361248
05/02/2003 11:00:00	29.74305323
05/02/2003 12:00:00	29.39059128
05/02/2003 13:00:00	29.03756554
05/02/2003 14:00:00	28.68531492
05/02/2003 15:00:00	28.3351783
05/02/2003 16:00:00	27.9884946
05/02/2003 17:00:00	27.64660272
05/02/2003 18:00:00	27.31084156
05/02/2003 19:00:00	26.98255001
05/02/2003 20:00:00	26.66306699
05/02/2003 21:00:00	26.35373139
05/02/2003 22:00:00	26.05588213
05/02/2003 23:00:00	25.77085809
06/02/2003 00:00:00	25.49999818
06/02/2003 01:00:00	25.24428469
06/02/2003 02:00:00	25.00327348
06/02/2003 03:00:00	24.7761638
06/02/2003 04:00:00	24.56215491
06/02/2003 05:00:00	24.36044607
06/02/2003 06:00:00	24.17023653
06/02/2003 07:00:00	23.99072556
06/02/2003 08:00:00	23.8211124
06/02/2003 09:00:00	23.66059632
06/02/2003 10:00:00	23.50837658
06/02/2003 11:00:00	23.36365242
06/02/2003 12:00:00	23.22562312
06/02/2003 13:00:00	23.09348791
06/02/2003 14:00:00	22.96644607
06/02/2003 15:00:00	22.84369685
06/02/2003 16:00:00	22.7244395
06/02/2003 17:00:00	22.60787329
06/02/2003 18:00:00	22.49319747
06/02/2003 19:00:00	22.37961129
06/02/2003 20:00:00	22.26631402
06/02/2003 21:00:00	22.15250492
06/02/2003 22:00:00	22.03738323
06/02/2003 23:00:00	21.92014821
07/02/2003 00:00:00	21.79999913
07/02/2003 01:00:00	21.67655769
07/02/2003 02:00:00	21.55113531
07/02/2003 03:00:00	21.42546587
07/02/2003 04:00:00	21.30128321
07/02/2003 05:00:00	21.18032121
07/02/2003 06:00:00	21.06431372
07/02/2003 07:00:00	20.9549946
07/02/2003 08:00:00	20.85409772
07/02/2003 09:00:00	20.76335694
07/02/2003 10:00:00	20.68450611
07/02/2003 11:00:00	20.6192791
07/02/2003 12:00:00	20.56940977
07/02/2003 13:00:00	20.53663198
07/02/2003 14:00:00	20.52267959
07/02/2003 15:00:00	20.52928646
07/02/2003 16:00:00	20.55818645
07/02/2003 17:00:00	20.61111342
07/02/2003 18:00:00	20.68980124
07/02/2003 19:00:00	20.79598377
07/02/2003 20:00:00	20.93139486
07/02/2003 21:00:00	21.09776838
07/02/2003 22:00:00	21.29683818
07/02/2003 23:00:00	21.53033814
08/02/2003 00:00:00	21.8000021
08/02/2003 01:00:00	22.1068529
08/02/2003 02:00:00	22.44906927
08/02/2003 03:00:00	22.82411894
08/02/2003 04:00:00	23.22946963
08/02/2003 05:00:00	23.66258908
08/02/2003 06:00:00	24.12094503
08/02/2003 07:00:00	24.60200519
08/02/2003 08:00:00	25.1032373
08/02/2003 09:00:00	25.62210908
08/02/2003 10:00:00	26.15608828
08/02/2003 11:00:00	26.70264261
08/02/2003 12:00:00	27.25923981
08/02/2003 13:00:00	27.82334761
08/02/2003 14:00:00	28.39243373
08/02/2003 15:00:00	28.96396591
08/02/2003 16:00:00	29.53541188
08/02/2003 17:00:00	30.10423936
08/02/2003 18:00:00	30.66791609
08/02/2003 19:00:00	31.2239098
08/02/2003 20:00:00	31.76968821
08/02/2003 21:00:00	32.30271906
08/02/2003 22:00:00	32.82047007
08/02/2003 23:00:00	33.32040898
09/02/2003 00:00:00	33.80000351
09/02/2003 01:00:00	34.25703802
09/02/2003 02:00:00	34.69056334
09/02/2003 03:00:00	35.09994692
09/02/2003 04:00:00	35.48455619
09/02/2003 05:00:00	35.8437586
09/02/2003 06:00:00	36.17692159
09/02/2003 07:00:00	36.48341259
09/02/2003 08:00:00	36.76259906
09/02/2003 09:00:00	37.01384843
09/02/2003 10:00:00	37.23652815
09/02/2003 11:00:00	37.43000566
09/02/2003 12:00:00	37.59364839
09/02/2003 13:00:00	37.7268238
09/02/2003 14:00:00	37.82889932
09/02/2003 15:00:00	37.8992424
09/02/2003 16:00:00	37.93722047
09/02/2003 17:00:00	37.94220098
09/02/2003 18:00:00	37.91355137
09/02/2003 19:00:00	37.85063909
09/02/2003 20:00:00	37.75283157
09/02/2003 21:00:00	37.61949626
09/02/2003 22:00:00	37.4500006
09/02/2003 23:00:00	37.24371202
10/02/2003 00:00:00	36.99999798
10/02/2003 01:00:00	36.71911001
10/02/2003 02:00:00	36.40483593
10/02/2003 03:00:00	36.06184762
10/02/2003 04:00:00	35.69481696
10/02/2003 05:00:00	35.30841582
10/02/2003 06:00:00	34.90731608
10/02/2003 07:00:00	34.49618963
10/02/2003 08:00:00	34.07970834
10/02/2003 09:00:00	33.66254408
10/02/2003 10:00:00	33.24936873
10/02/2003 11:00:00	32.84485418
10/02/2003 12:00:00	32.4536723
10/02/2003 13:00:00	32.08049496
10/02/2003 14:00:00	31.72999405
10/02/2003 15:00:00	31.40684143
10/02/2003 16:00:00	31.115709
10/02/2003 17:00:00	30.86126863
10/02/2003 18:00:00	30.64819219
10/02/2003 19:00:00	30.48115156
10/02/2003 20:00:00	30.36481863
10/02/2003 21:00:00	30.30386526
10/02/2003 22:00:00	30.30296333
10/02/2003 23:00:00	30.36678473
11/02/2003 00:00:00	30.50000133
11/02/2003 01:00:00	30.70565284
11/02/2003 02:00:00	30.98025042
11/02/2003 03:00:00	31.31867316
11/02/2003 04:00:00	31.71580013
11/02/2003 05:00:00	32.16651039
11/02/2003 06:00:00	32.66568304
11/02/2003 07:00:00	33.20819715
11/02/2003 08:00:00	33.78893178
11/02/2003 09:00:00	34.40276602
11/02/2003 10:00:00	35.04457894
11/02/2003 11:00:00	35.70924962
11/02/2003 12:00:00	36.39165713
11/02/2003 13:00:00	37.08668056
11/02/2003 14:00:00	37.78919896
11/02/2003 15:00:00	38.49409143
11/02/2003 16:00:00	39.19623703
11/02/2003 17:00:00	39.89051484
11/02/2003 18:00:00	40.57180394
11/02/2003 19:00:00	41.23498341
11/02/2003 20:00:00	41.87493231
11/02/2003 21:00:00	42.48652972
11/02/2003 22:00:00	43.06465473
11/02/2003 23:00:00	43.6041864
12/02/2003 00:00:00	44.10000381
12/02/2003 01:00:00	44.54818174
12/02/2003 02:00:00	44.94957769
12/02/2003 03:00:00	45.30624479
12/02/2003 04:00:00	45.62023617
12/02/2003 05:00:00	45.89360499
12/02/2003 06:00:00	46.12840438
12/02/2003 07:00:00	46.32668748
12/02/2003 08:00:00	46.49050742
12/02/2003 09:00:00	46.62191735
12/02/2003 10:00:00	46.72297041
12/02/2003 11:00:00	46.79571972
12/02/2003 12:00:00	46.84221845
12/02/2003 13:00:00	46.86451971
12/02/2003 14:00:00	46.86467665
12/02/2003 15:00:00	46.84474242
12/02/2003 16:00:00	46.80677014
12/02/2003 17:00:00	46.75281296
12/02/2003 18:00:00	46.68492401
12/02/2003 19:00:00	46.60515645
12/02/2003 20:00:00	46.51556339
12/02/2003 21:00:00	46.41819799
12/02/2003 22:00:00	46.31511339
12/02/2003 23:00:00	46.20836271
13/02/2003 00:00:00	46.0999991
13/02/2003 01:00:00	45.9924263
13/02/2003 02:00:00	45.88945035
13/02/2003 03:00:00	45.7952279
13/02/2003 04:00:00	45.71391557
13/02/2003 05:00:00	45.64967
13/02/2003 06:00:00	45.60664782
13/02/2003 07:00:00	45.58900566
13/02/2003 08:00:00	45.60090015
13/02/2003 09:00:00	45.64648793
13/02/2003 10:00:00	45.72992563
13/02/2003 11:00:00	45.85536989
13/02/2003 12:00:00	46.02697733
13/02/2003 13:00:00	46.24890459
13/02/2003 14:00:00	46.52530829
13/02/2003 15:00:00	46.86034508
13/02/2003 16:00:00	47.25817159
13/02/2003 17:00:00	47.72294444
13/02/2003 18:00:00	48.25882027
13/02/2003 19:00:00	48.86995572
13/02/2003 20:00:00	49.56050741
13/02/2003 21:00:00	50.33463198
13/02/2003 22:00:00	51.19648606
13/02/2003 23:00:00	52.15022629
14/02/2003 00:00:00	53.20000929
14/02/2003 01:00:00	54.34822553
14/02/2003 02:00:00	55.59020101
14/02/2003 03:00:00	56.91949563
14/02/2003 04:00:00	58.32966932
14/02/2003 05:00:00	59.81428198
14/02/2003 06:00:00	61.36689353
14/02/2003 07:00:00	62.98106389
14/02/2003 08:00:00	64.65035297
14/02/2003 09:00:00	66.36832069
14/02/2003 10:00:00	68.12852695
14/02/2003 11:00:00	69.92453167
14/02/2003 12:00:00	71.74989477
14/02/2003 13:00:00	73.59817617
14/02/2003 14:00:00	75.46293576
14/02/2003 15:00:00	77.33773348
14/02/2003 16:00:00	79.21612924
14/02/2003 17:00:00	81.09168294
14/02/2003 18:00:00	82.95795451
14/02/2003 19:00:00	84.80850385
14/02/2003 20:00:00	86.63689089
14/02/2003 21:00:00	88.43667553
14/02/2003 22:00:00	90.2014177
14/02/2003 23:00:00	91.9246773
15/02/2003 00:00:00	93.60001425
15/02/2003 01:00:00	95.22195152
15/02/2003 02:00:00	96.78886418
15/02/2003 03:00:00	98.30009033
15/02/2003 04:00:00	99.75496805
15/02/2003 05:00:00	101.1528354
15/02/2003 06:00:00	102.4930305
15/02/2003 07:00:00	103.7748914
15/02/2003 08:00:00	104.9977563
15/02/2003 09:00:00	106.1609631
15/02/2003 10:00:00	107.26385
15/02/2003 11:00:00	108.305755
15/02/2003 12:00:00	109.2860163
15/02/2003 13:00:00	110.2039719
15/02/2003 14:00:00	111.05896
15/02/2003 15:00:00	111.8503185
15/02/2003 16:00:00	112.5773856
15/02/2003 17:00:00	113.2394994
15/02/2003 18:00:00	113.8359979
15/02/2003 19:00:00	114.3662192
15/02/2003 20:00:00	114.8295015
15/02/2003 21:00:00	115.2251827
15/02/2003 22:00:00	115.5526011
15/02/2003 23:00:00	115.8110946
16/02/2003 00:00:00	116.0000014
16/02/2003 01:00:00	116.1193151
16/02/2003 02:00:00	116.171652
16/02/2003 03:00:00	116.1602838
16/02/2003 04:00:00	116.0884823
16/02/2003 05:00:00	115.9595193
16/02/2003 06:00:00	115.7766665
16/02/2003 07:00:00	115.5431958
16/02/2003 08:00:00	115.2623789
16/02/2003 09:00:00	114.9374875
16/02/2003 10:00:00	114.5717936
16/02/2003 11:00:00	114.1685687
16/02/2003 12:00:00	113.7310848
16/02/2003 13:00:00	113.2626135
16/02/2003 14:00:00	112.7664267
16/02/2003 15:00:00	112.2457961
16/02/2003 16:00:00	111.7039936
16/02/2003 17:00:00	111.1442908
16/02/2003 18:00:00	110.5699596
16/02/2003 19:00:00	109.9842717
16/02/2003 20:00:00	109.390499
16/02/2003 21:00:00	108.7919131
16/02/2003 22:00:00	108.1917859
16/02/2003 23:00:00	107.5933892
17/02/2003 00:00:00	106.9999947
17/02/2003 01:00:00	106.4141894
17/02/2003 02:00:00	105.8358214
17/02/2003 03:00:00	105.2640541
17/02/2003 04:00:00	104.6980508
17/02/2003 05:00:00	104.1369749
17/02/2003 06:00:00	103.5799897
17/02/2003 07:00:00	103.0262586
17/02/2003 08:00:00	102.474945
17/02/2003 09:00:00	101.9252121
17/02/2003 10:00:00	101.3762233
17/02/2003 11:00:00	100.8271421
17/02/2003 12:00:00	100.2771317
17/02/2003 13:00:00	99.72535553
17/02/2003 14:00:00	99.1709769
17/02/2003 15:00:00	98.61315919
17/02/2003 16:00:00	98.05106574
17/02/2003 17:00:00	97.48385991
17/02/2003 18:00:00	96.91070505
17/02/2003 19:00:00	96.33076453
17/02/2003 20:00:00	95.74320168
17/02/2003 21:00:00	95.14717986
17/02/2003 22:00:00	94.54186244
17/02/2003 23:00:00	93.92641276
18/02/2003 00:00:00	93.29999417
18/02/2003 01:00:00	92.66211727
18/02/2003 02:00:00	92.01368152
18/02/2003 03:00:00	91.35593361
18/02/2003 04:00:00	90.69012021
18/02/2003 05:00:00	90.01748802
18/02/2003 06:00:00	89.33928372
18/02/2003 07:00:00	88.656754
18/02/2003 08:00:00	87.97114552
18/02/2003 09:00:00	87.28370499
18/02/2003 10:00:00	86.59567908
18/02/2003 11:00:00	85.90831448
18/02/2003 12:00:00	85.22285787
18/02/2003 13:00:00	84.54055594
18/02/2003 14:00:00	83.86265536
18/02/2003 15:00:00	83.19040283
18/02/2003 16:00:00	82.52504502
18/02/2003 17:00:00	81.86782862
18/02/2003 18:00:00	81.22000032
18/02/2003 19:00:00	80.58280679
18/02/2003 20:00:00	79.95749473
18/02/2003 21:00:00	79.34531081
18/02/2003 22:00:00	78.74750172
18/02/2003 23:00:00	78.16531414
19/02/2003 00:00:00	77.59999476
19/02/2003 01:00:00	77.05227418
19/02/2003 02:00:00	76.52081871
19/02/2003 03:00:00	76.0037786
19/02/2003 04:00:00	75.49930412
19/02/2003 05:00:00	75.00554552
19/02/2003 06:00:00	74.52065307
19/02/2003 07:00:00	74.04277702
19/02/2003 08:00:00	73.57006762
19/02/2003 09:00:00	73.10067515
19/02/2003 10:00:00	72.63274985
19/02/2003 11:00:00	72.16444198
19/02/2003 12:00:00	71.69390181
19/02/2003 13:00:00	71.21927958
19/02/2003 14:00:00	70.73872557
19/02/2003 15:00:00	70.25039002
19/02/2003 16:00:00	69.7524232
19/02/2003 17:00:00	69.24297536
19/02/2003 18:00:00	68.72019676
19/02/2003 19:00:00	68.18223767
19/02/2003 20:00:00	67.62724833
19/02/2003 21:00:00	67.053379
19/02/2003 22:00:00	66.45877996
19/02/2003 23:00:00	65.84160144
20/02/2003 00:00:00	65.19999372
20/02/2003 01:00:00	64.53284756
20/02/2003 02:00:00	63.84201576
20/02/2003 03:00:00	63.13009156
20/02/2003 04:00:00	62.39966821
20/02/2003 05:00:00	61.65333898
20/02/2003 06:00:00	60.89369712
20/02/2003 07:00:00	60.12333588
20/02/2003 08:00:00	59.34484852
20/02/2003 09:00:00	58.5608283
20/02/2003 10:00:00	57.77386846
20/02/2003 11:00:00	56.98656227
20/02/2003 12:00:00	56.20150298
20/02/2003 13:00:00	55.42128385
20/02/2003 14:00:00	54.64849813
20/02/2003 15:00:00	53.88573908
20/02/2003 16:00:00	53.13559995
20/02/2003 17:00:00	52.40067399
20/02/2003 18:00:00	51.68355447
20/02/2003 19:00:00	50.98683464
20/02/2003 20:00:00	50.31310775
20/02/2003 21:00:00	49.66496706
20/02/2003 22:00:00	49.04500582
20/02/2003 23:00:00	48.45581729
21/02/2003 00:00:00	47.89999473
21/02/2003 01:00:00	47.37944325
21/02/2003 02:00:00	46.89331552
21/02/2003 03:00:00	46.44007611
21/02/2003 04:00:00	46.01818957
21/02/2003 05:00:00	45.62612049
21/02/2003 06:00:00	45.26233343
21/02/2003 07:00:00	44.92529295
21/02/2003 08:00:00	44.61346363
21/02/2003 09:00:00	44.32531003
21/02/2003 10:00:00	44.05929672
21/02/2003 11:00:00	43.81388827
21/02/2003 12:00:00	43.58754925
21/02/2003 13:00:00	43.37874421
21/02/2003 14:00:00	43.18593774
21/02/2003 15:00:00	43.0075944
21/02/2003 16:00:00	42.84217876
21/02/2003 17:00:00	42.68815538
21/02/2003 18:00:00	42.54398883
21/02/2003 19:00:00	42.40814368
21/02/2003 20:00:00	42.2790845
21/02/2003 21:00:00	42.15527586
21/02/2003 22:00:00	42.03518232
21/02/2003 23:00:00	41.91726845
22/02/2003 00:00:00	41.79999883
22/02/2003 01:00:00	41.68217174
22/02/2003 02:00:00	41.56392035
22/02/2003 03:00:00	41.44571154
22/02/2003 04:00:00	41.32801218
22/02/2003 05:00:00	41.21128916
22/02/2003 06:00:00	41.09600935
22/02/2003 07:00:00	40.98263962
22/02/2003 08:00:00	40.87164685
22/02/2003 09:00:00	40.76349791
22/02/2003 10:00:00	40.65865969
22/02/2003 11:00:00	40.55759906
22/02/2003 12:00:00	40.46078289
22/02/2003 13:00:00	40.36867806
22/02/2003 14:00:00	40.28175145
22/02/2003 15:00:00	40.20046993
22/02/2003 16:00:00	40.12530037
22/02/2003 17:00:00	40.05670967
22/02/2003 18:00:00	39.99516468
22/02/2003 19:00:00	39.94113229
22/02/2003 20:00:00	39.89507937
22/02/2003 21:00:00	39.85747281
22/02/2003 22:00:00	39.82877946
22/02/2003 23:00:00	39.80946622
23/02/2003 00:00:00	39.79999996
23/02/2003 01:00:00	39.80056247
23/02/2003 02:00:00	39.81019528
23/02/2003 03:00:00	39.82765488
23/02/2003 04:00:00	39.85169771
23/02/2003 05:00:00	39.88108026
23/02/2003 06:00:00	39.914559
23/02/2003 07:00:00	39.95089038
23/02/2003 08:00:00	39.98883089
23/02/2003 09:00:00	40.02713699
23/02/2003 10:00:00	40.06456515
23/02/2003 11:00:00	40.09987185
23/02/2003 12:00:00	40.13181354
23/02/2003 13:00:00	40.15914671
23/02/2003 14:00:00	40.18062781
23/02/2003 15:00:00	40.19501332
23/02/2003 16:00:00	40.20105971
23/02/2003 17:00:00	40.19752345
23/02/2003 18:00:00	40.18316101
23/02/2003 19:00:00	40.15672885
23/02/2003 20:00:00	40.11698345
23/02/2003 21:00:00	40.06268128
23/02/2003 22:00:00	39.9925788
23/02/2003 23:00:00	39.90543249
24/02/2003 00:00:00	39.79999881
24/02/2003 01:00:00	39.67584805
24/02/2003 02:00:00	39.53580563
24/02/2003 03:00:00	39.38351075
24/02/2003 04:00:00	39.22260259
24/02/2003 05:00:00	39.05672035
24/02/2003 06:00:00	38.88950322
24/02/2003 07:00:00	38.72459038
24/02/2003 08:00:00	38.56562103
24/02/2003 09:00:00	38.41623436
24/02/2003 10:00:00	38.28006955
24/02/2003 11:00:00	38.1607658
24/02/2003 12:00:00	38.0619623
24/02/2003 13:00:00	37.98729824
24/02/2003 14:00:00	37.94041281
24/02/2003 15:00:00	37.92494519
24/02/2003 16:00:00	37.94453459
24/02/2003 17:00:00	38.00282018
24/02/2003 18:00:00	38.10344116
24/02/2003 19:00:00	38.25003673
24/02/2003 20:00:00	38.44624606
24/02/2003 21:00:00	38.69570836
24/02/2003 22:00:00	39.0020628
24/02/2003 23:00:00	39.36894859
25/02/2003 00:00:00	39.8000049
25/02/2003 01:00:00	40.29750672
25/02/2003 02:00:00	40.85827231
25/02/2003 03:00:00	41.47775579
25/02/2003 04:00:00	42.1514113
25/02/2003 05:00:00	42.87469297
25/02/2003 06:00:00	43.64305492
25/02/2003 07:00:00	44.4519513
25/02/2003 08:00:00	45.29683622
25/02/2003 09:00:00	46.17316383
25/02/2003 10:00:00	47.07638824
25/02/2003 11:00:00	48.0019636
25/02/2003 12:00:00	48.94534403
25/02/2003 13:00:00	49.90198366
25/02/2003 14:00:00	50.86733663
25/02/2003 15:00:00	51.83685706
25/02/2003 16:00:00	52.80599909
25/02/2003 17:00:00	53.77021684
25/02/2003 18:00:00	54.72496445
25/02/2003 19:00:00	55.66569605
25/02/2003 20:00:00	56.58786577
25/02/2003 21:00:00	57.48692773
25/02/2003 22:00:00	58.35833607
25/02/2003 23:00:00	59.19754492
26/02/2003 00:00:00	60.00000841
26/02/2003 01:00:00	60.76227907
26/02/2003 02:00:00	61.48530286
26/02/2003 03:00:00	62.17112406
26/02/2003 04:00:00	62.82178697
26/02/2003 05:00:00	63.43933586
26/02/2003 06:00:00	64.02581503
26/02/2003 07:00:00	64.58326876
26/02/2003 08:00:00	65.11374134
26/02/2003 09:00:00	65.61927706
26/02/2003 10:00:00	66.1019202
26/02/2003 11:00:00	66.56371505
26/02/2003 12:00:00	67.0067059
26/02/2003 13:00:00	67.43293703
26/02/2003 14:00:00	67.84445273
26/02/2003 15:00:00	68.24329728
26/02/2003 16:00:00	68.63151498
26/02/2003 17:00:00	69.01115011
26/02/2003 18:00:00	69.38424696
26/02/2003 19:00:00	69.75284981
26/02/2003 20:00:00	70.11900295
26/02/2003 21:00:00	70.48475067
26/02/2003 22:00:00	70.85213726
26/02/2003 23:00:00	71.22320699
27/02/2003 00:00:00	71.60000416
27/02/2003 01:00:00	71.98393816
27/02/2003 02:00:00	72.37387889
27/02/2003 03:00:00	72.76806138
27/02/2003 04:00:00	73.16472068
27/02/2003 05:00:00	73.56209183
27/02/2003 06:00:00	73.95840987
27/02/2003 07:00:00	74.35190985
27/02/2003 08:00:00	74.7408268
27/02/2003 09:00:00	75.12339576
27/02/2003 10:00:00	75.49785179
27/02/2003 11:00:00	75.86242991
27/02/2003 12:00:00	76.21536518
27/02/2003 13:00:00	76.55489263
27/02/2003 14:00:00	76.87924731
27/02/2003 15:00:00	77.18666425
27/02/2003 16:00:00	77.4753785
27/02/2003 17:00:00	77.7436251
27/02/2003 18:00:00	77.9896391
27/02/2003 19:00:00	78.21165553
27/02/2003 20:00:00	78.40790944
27/02/2003 21:00:00	78.57663586
27/02/2003 22:00:00	78.71606984
27/02/2003 23:00:00	78.82444643
28/02/2003 00:00:00	78.90000065
28/02/2003 01:00:00	78.9418662
28/02/2003 02:00:00	78.95277114
28/02/2003 03:00:00	78.93634215
28/02/2003 04:00:00	78.89620587
28/02/2003 05:00:00	78.83598897
28/02/2003 06:00:00	78.75931809
28/02/2003 07:00:00	78.66981991
28/02/2003 08:00:00	78.57112107
28/02/2003 09:00:00	78.46684824
28/02/2003 10:00:00	78.36062806
28/02/2003 11:00:00	78.25608721
28/02/2003 12:00:00	78.15685233
28/02/2003 13:00:00	78.06655008
28/02/2003 14:00:00	77.98880712
28/02/2003 15:00:00	77.92725011
28/02/2003 16:00:00	77.8855057
28/02/2003 17:00:00	77.86720056
28/02/2003 18:00:00	77.87596133
28/02/2003 19:00:00	77.91541468
28/02/2003 20:00:00	77.98918727
28/02/2003 21:00:00	78.10090574
28/02/2003 22:00:00	78.25419677
28/02/2003 23:00:00	78.452687
01/03/2003 00:00:00	78.70000309
01/03/2003 01:00:00	78.998541
01/03/2003 02:00:00	79.34577406
01/03/2003 03:00:00	79.73794496
01/03/2003 04:00:00	80.17129641
01/03/2003 05:00:00	80.64207111
01/03/2003 06:00:00	81.14651177
01/03/2003 07:00:00	81.68086109
01/03/2003 08:00:00	82.24136177
01/03/2003 09:00:00	82.82425653
01/03/2003 10:00:00	83.42578806
01/03/2003 11:00:00	84.04219908
01/03/2003 12:00:00	84.66973227
01/03/2003 13:00:00	85.30463035
01/03/2003 14:00:00	85.94313602
01/03/2003 15:00:00	86.58149199
01/03/2003 16:00:00	87.21594096
01/03/2003 17:00:00	87.84272563
01/03/2003 18:00:00	88.45808871
01/03/2003 19:00:00	89.0582729
01/03/2003 20:00:00	89.6395209
01/03/2003 21:00:00	90.19807543
01/03/2003 22:00:00	90.73017918
01/03/2003 23:00:00	91.23207487
02/03/2003 00:00:00	91.70000518
02/03/2003 01:00:00	92.13141573
02/03/2003 02:00:00	92.52856351
02/03/2003 03:00:00	92.89490835
02/03/2003 04:00:00	93.23391006
02/03/2003 05:00:00	93.54902846
02/03/2003 06:00:00	93.84372337
02/03/2003 07:00:00	94.12145461
02/03/2003 08:00:00	94.38568198
02/03/2003 09:00:00	94.63986532
02/03/2003 10:00:00	94.88746443
02/03/2003 11:00:00	95.13193914
02/03/2003 12:00:00	95.37674926
02/03/2003 13:00:00	95.6253546
02/03/2003 14:00:00	95.881215
02/03/2003 15:00:00	96.14779026
02/03/2003 16:00:00	96.4285402
02/03/2003 17:00:00	96.72692464
02/03/2003 18:00:00	97.04640339
02/03/2003 19:00:00	97.39043628
02/03/2003 20:00:00	97.76248312
02/03/2003 21:00:00	98.16600373
02/03/2003 22:00:00	98.60445792
02/03/2003 23:00:00	99.08130552
03/03/2003 00:00:00	99.60000633
03/03/2003 01:00:00	100.162747
03/03/2003 02:00:00	100.7666214
03/03/2003 03:00:00	101.4074503
03/03/2003 04:00:00	102.0810546
03/03/2003 05:00:00	102.7832551
03/03/2003 06:00:00	103.5098726
03/03/2003 07:00:00	104.2567278
03/03/2003 08:00:00	105.0196416
03/03/2003 09:00:00	105.7944347
03/03/2003 10:00:00	106.5769281
03/03/2003 11:00:00	107.3629425
03/03/2003 12:00:00	108.1482986
03/03/2003 13:00:00	108.9288174
03/03/2003 14:00:00	109.7003195
03/03/2003 15:00:00	110.4586259
03/03/2003 16:00:00	111.1995572
03/03/2003 17:00:00	111.9189344
03/03/2003 18:00:00	112.6125782
03/03/2003 19:00:00	113.2763094
03/03/2003 20:00:00	113.9059489
03/03/2003 21:00:00	114.4973174
03/03/2003 22:00:00	115.0462357
03/03/2003 23:00:00	115.5485247
04/03/2003 00:00:00	116.0000051
04/03/2003 01:00:00	116.3973132
04/03/2003 02:00:00	116.7403472
04/03/2003 03:00:00	117.0298206
04/03/2003 04:00:00	117.2664471
04/03/2003 05:00:00	117.4509401
04/03/2003 06:00:00	117.5840132
04/03/2003 07:00:00	117.66638
04/03/2003 08:00:00	117.698754
04/03/2003 09:00:00	117.6818489
04/03/2003 10:00:00	117.6163781
04/03/2003 11:00:00	117.5030553
04/03/2003 12:00:00	117.342594
04/03/2003 13:00:00	117.1357077
04/03/2003 14:00:00	116.88311
04/03/2003 15:00:00	116.5855146
04/03/2003 16:00:00	116.2436349
04/03/2003 17:00:00	115.8581844
04/03/2003 18:00:00	115.4298769
04/03/2003 19:00:00	114.9594258
04/03/2003 20:00:00	114.4475447
04/03/2003 21:00:00	113.8949472
04/03/2003 22:00:00	113.3023468
04/03/2003 23:00:00	112.6704571
05/03/2003 00:00:00	111.9999917
05/03/2003 01:00:00	111.2922
05/03/2003 02:00:00	110.5504752
05/03/2003 03:00:00	109.7787466
05/03/2003 04:00:00	108.9809431
05/03/2003 05:00:00	108.160994
05/03/2003 06:00:00	107.3228282
05/03/2003 07:00:00	106.470375
05/03/2003 08:00:00	105.6075634
05/03/2003 09:00:00	104.7383225
05/03/2003 10:00:00	103.8665815
05/03/2003 11:00:00	102.9962694
05/03/2003 12:00:00	102.1313155
05/03/2003 13:00:00	101.2756487
05/03/2003 14:00:00	100.4331982
05/03/2003 15:00:00	99.60789315
05/03/2003 16:00:00	98.8036626
05/03/2003 17:00:00	98.02443568
05/03/2003 18:00:00	97.27414151
05/03/2003 19:00:00	96.55670919
05/03/2003 20:00:00	95.87606783
05/03/2003 21:00:00	95.23614655
05/03/2003 22:00:00	94.64087445
05/03/2003 23:00:00	94.09418065
06/03/2003 00:00:00	93.59999427
06/03/2003 01:00:00	93.1613179
06/03/2003 02:00:00	92.77744833
06/03/2003 03:00:00	92.44675589
06/03/2003 04:00:00	92.16761093
06/03/2003 05:00:00	91.93838377
06/03/2003 06:00:00	91.75744477
06/03/2003 07:00:00	91.62316427
06/03/2003 08:00:00	91.5339126
06/03/2003 09:00:00	91.48806011
06/03/2003 10:00:00	91.48397713
06/03/2003 11:00:00	91.52003401
06/03/2003 12:00:00	91.59460108
06/03/2003 13:00:00	91.70604869
06/03/2003 14:00:00	91.85274718
06/03/2003 15:00:00	92.03306689
06/03/2003 16:00:00	92.24537815
06/03/2003 17:00:00	92.48805132
06/03/2003 18:00:00	92.75945672
06/03/2003 19:00:00	93.0579647
06/03/2003 20:00:00	93.3819456
06/03/2003 21:00:00	93.72976977
06/03/2003 22:00:00	94.09980753
06/03/2003 23:00:00	94.49042924
07/03/2003 00:00:00	94.90000522
07/03/2003 01:00:00	95.32710991
07/03/2003 02:00:00	95.77113396
07/03/2003 03:00:00	96.23167213
07/03/2003 04:00:00	96.70831913
07/03/2003 05:00:00	97.20066972
07/03/2003 06:00:00	97.70831862
07/03/2003 07:00:00	98.23086058
07/03/2003 08:00:00	98.76789031
07/03/2003 09:00:00	99.31900257
07/03/2003 10:00:00	99.88379209
07/03/2003 11:00:00	100.4618536
07/03/2003 12:00:00	101.0527818
07/03/2003 13:00:00	101.6561715
07/03/2003 14:00:00	102.2716174
07/03/2003 15:00:00	102.8987143
07/03/2003 16:00:00	103.5370568
07/03/2003 17:00:00	104.1862397
07/03/2003 18:00:00	104.8458577
07/03/2003 19:00:00	105.5155056
07/03/2003 20:00:00	106.1947782
07/03/2003 21:00:00	106.88327
07/03/2003 22:00:00	107.580576
07/03/2003 23:00:00	108.2862908
08/03/2003 00:00:00	109.0000091
08/03/2003 01:00:00	109.7210019
08/03/2003 02:00:00	110.4472447
08/03/2003 03:00:00	111.1763892
08/03/2003 04:00:00	111.9060874
08/03/2003 05:00:00	112.6339908
08/03/2003 06:00:00	113.3577513
08/03/2003 07:00:00	114.0750206
08/03/2003 08:00:00	114.7834505
08/03/2003 09:00:00	115.4806927
08/03/2003 10:00:00	116.164399
08/03/2003 11:00:00	116.8322212
08/03/2003 12:00:00	117.481811
08/03/2003 13:00:00	118.1108201
08/03/2003 14:00:00	118.7169004
08/03/2003 15:00:00	119.2977036
08/03/2003 16:00:00	119.8508815
08/03/2003 17:00:00	120.3740857
08/03/2003 18:00:00	120.8649682
08/03/2003 19:00:00	121.3211805
08/03/2003 20:00:00	121.7403746
08/03/2003 21:00:00	122.1202021
08/03/2003 22:00:00	122.4583148
08/03/2003 23:00:00	122.7523645
09/03/2003 00:00:00	123.0000029
09/03/2003 01:00:00	123.1994667
09/03/2003 02:00:00	123.3513321
09/03/2003 03:00:00	123.4567602
09/03/2003 04:00:00	123.516912
09/03/2003 05:00:00	123.5329487
09/03/2003 06:00:00	123.5060313
09/03/2003 07:00:00	123.4373209
09/03/2003 08:00:00	123.3279785
09/03/2003 09:00:00	123.1791652
09/03/2003 10:00:00	122.9920421
09/03/2003 11:00:00	122.7677704
09/03/2003 12:00:00	122.5075109
09/03/2003 13:00:00	122.2124249
09/03/2003 14:00:00	121.8836734
09/03/2003 15:00:00	121.5224175
09/03/2003 16:00:00	121.1298182
09/03/2003 17:00:00	120.7070366
09/03/2003 18:00:00	120.2552338
09/03/2003 19:00:00	119.7755709
09/03/2003 20:00:00	119.2692089
09/03/2003 21:00:00	118.737309
09/03/2003 22:00:00	118.1810321
09/03/2003 23:00:00	117.6015395
10/03/2003 00:00:00	116.999992
10/03/2003 01:00:00	116.3774232
10/03/2003 02:00:00	115.7343556
10/03/2003 03:00:00	115.0711841
10/03/2003 04:00:00	114.3883037
10/03/2003 05:00:00	113.6861092
10/03/2003 06:00:00	112.9649957
10/03/2003 07:00:00	112.2253579
10/03/2003 08:00:00	111.4675909
10/03/2003 09:00:00	110.6920894
10/03/2003 10:00:00	109.8992486
10/03/2003 11:00:00	109.0894632
10/03/2003 12:00:00	108.2631281
10/03/2003 13:00:00	107.4206384
10/03/2003 14:00:00	106.5623889
10/03/2003 15:00:00	105.6887745
10/03/2003 16:00:00	104.8001901
10/03/2003 17:00:00	103.8970307
10/03/2003 18:00:00	102.9796912
10/03/2003 19:00:00	102.0485665
10/03/2003 20:00:00	101.1040515
10/03/2003 21:00:00	100.1465411
10/03/2003 22:00:00	99.17643021
10/03/2003 23:00:00	98.1941138
11/03/2003 00:00:00	97.19998675
11/03/2003 01:00:00	96.19473158
11/03/2003 02:00:00	95.1801811
11/03/2003 03:00:00	94.15845566
11/03/2003 04:00:00	93.13167566
11/03/2003 05:00:00	92.10196146
11/03/2003 06:00:00	91.07143343
11/03/2003 07:00:00	90.04221196
11/03/2003 08:00:00	89.01641741
11/03/2003 09:00:00	87.99617015
11/03/2003 10:00:00	86.98359057
11/03/2003 11:00:00	85.98079903
11/03/2003 12:00:00	84.98991591
11/03/2003 13:00:00	84.01306158
11/03/2003 14:00:00	83.05235641
11/03/2003 15:00:00	82.10992079
11/03/2003 16:00:00	81.18787508
11/03/2003 17:00:00	80.28833965
11/03/2003 18:00:00	79.41343489
11/03/2003 19:00:00	78.56528116
11/03/2003 20:00:00	77.74599883
11/03/2003 21:00:00	76.95770829
11/03/2003 22:00:00	76.2025299
11/03/2003 23:00:00	75.48258404
12/03/2003 00:00:00	74.79999109
12/03/2003 01:00:00	74.15638407
12/03/2003 02:00:00	73.55144681
12/03/2003 03:00:00	72.98437579
12/03/2003 04:00:00	72.45436752
12/03/2003 05:00:00	71.96061852
12/03/2003 06:00:00	71.50232529
12/03/2003 07:00:00	71.07868433
12/03/2003 08:00:00	70.68889215
12/03/2003 09:00:00	70.33214526
12/03/2003 10:00:00	70.00764016
12/03/2003 11:00:00	69.71457337
12/03/2003 12:00:00	69.45214138
12/03/2003 13:00:00	69.2195407
12/03/2003 14:00:00	69.01596784
12/03/2003 15:00:00	68.84061931
12/03/2003 16:00:00	68.69269161
12/03/2003 17:00:00	68.57138125
12/03/2003 18:00:00	68.47588473
12/03/2003 19:00:00	68.40539857
12/03/2003 20:00:00	68.35911926
12/03/2003 21:00:00	68.33624331
12/03/2003 22:00:00	68.33596723
12/03/2003 23:00:00	68.35748754
13/03/2003 00:00:00	68.40000072
13/03/2003 01:00:00	68.46451694
13/03/2003 02:00:00	68.55930068
13/03/2003 03:00:00	68.69442991
13/03/2003 04:00:00	68.8799826
13/03/2003 05:00:00	69.12603674
13/03/2003 06:00:00	69.44267029
13/03/2003 07:00:00	69.83996124
13/03/2003 08:00:00	70.32798756
13/03/2003 09:00:00	70.91682723
13/03/2003 10:00:00	71.61655821
13/03/2003 11:00:00	72.4372585
13/03/2003 12:00:00	73.38900606
13/03/2003 13:00:00	74.48187887
13/03/2003 14:00:00	75.72595491
13/03/2003 15:00:00	77.13131215
13/03/2003 16:00:00	78.70802858
13/03/2003 17:00:00	80.46618215
13/03/2003 18:00:00	82.41585086
13/03/2003 19:00:00	84.56711268
13/03/2003 20:00:00	86.93004558
13/03/2003 21:00:00	89.51472754
13/03/2003 22:00:00	92.33123654
13/03/2003 23:00:00	95.38965055
14/03/2003 00:00:00	98.70004755
14/03/2003 01:00:00	102.2701944
14/03/2003 02:00:00	106.0986142
14/03/2003 03:00:00	110.1815188
14/03/2003 04:00:00	114.5151205
14/03/2003 05:00:00	119.0956312
14/03/2003 06:00:00	123.9192631
14/03/2003 07:00:00	128.9822282
14/03/2003 08:00:00	134.2807387
14/03/2003 09:00:00	139.8110065
14/03/2003 10:00:00	145.5692437
14/03/2003 11:00:00	151.5516625
14/03/2003 12:00:00	157.7544749
14/03/2003 13:00:00	164.173893
14/03/2003 14:00:00	170.8061289
14/03/2003 15:00:00	177.6473946
14/03/2003 16:00:00	184.6939022
14/03/2003 17:00:00	191.9418638
14/03/2003 18:00:00	199.3874914
14/03/2003 19:00:00	207.0269973
14/03/2003 20:00:00	214.8565933
14/03/2003 21:00:00	222.8724916
14/03/2003 22:00:00	231.0709043
14/03/2003 23:00:00	239.4480434
15/03/2003 00:00:00	248.0001211
15/03/2003 01:00:00	256.7229238
15/03/2003 02:00:00	265.6105358
15/03/2003 03:00:00	274.656616
15/03/2003 04:00:00	283.8548231
15/03/2003 05:00:00	293.1988159
15/03/2003 06:00:00	302.6822533
15/03/2003 07:00:00	312.2987939
15/03/2003 08:00:00	322.0420966
15/03/2003 09:00:00	331.9058202
15/03/2003 10:00:00	341.8836234
15/03/2003 11:00:00	351.9691651
15/03/2003 12:00:00	362.1561041
15/03/2003 13:00:00	372.4380991
15/03/2003 14:00:00	382.8088088
15/03/2003 15:00:00	393.2618922
15/03/2003 16:00:00	403.791008
15/03/2003 17:00:00	414.389815
15/03/2003 18:00:00	425.0519719
15/03/2003 19:00:00	435.7711376
15/03/2003 20:00:00	446.5409709
15/03/2003 21:00:00	457.3551305
15/03/2003 22:00:00	468.2072752
15/03/2003 23:00:00	479.0910638
16/03/2003 00:00:00	490.0001551
16/03/2003 01:00:00	500.9251753
16/03/2003 02:00:00	511.8446202
16/03/2003 03:00:00	522.7339534
16/03/2003 04:00:00	533.5686385
16/03/2003 05:00:00	544.3241389
16/03/2003 06:00:00	554.9759182
16/03/2003 07:00:00	565.4994399
16/03/2003 08:00:00	575.8701676
16/03/2003 09:00:00	586.0635648
16/03/2003 10:00:00	596.055095
16/03/2003 11:00:00	605.8202217
16/03/2003 12:00:00	615.3344085
16/03/2003 13:00:00	624.573119
16/03/2003 14:00:00	633.5118165
16/03/2003 15:00:00	642.1259648
16/03/2003 16:00:00	650.3910272
16/03/2003 17:00:00	658.2824674
16/03/2003 18:00:00	665.7757489
16/03/2003 19:00:00	672.8463351
16/03/2003 20:00:00	679.4696897
16/03/2003 21:00:00	685.6212762
16/03/2003 22:00:00	691.276558
16/03/2003 23:00:00	696.4109988
17/03/2003 00:00:00	701.000062
17/03/2003 01:00:00	705.0255245
17/03/2003 02:00:00	708.4944147
17/03/2003 03:00:00	711.420074
17/03/2003 04:00:00	713.8158435
17/03/2003 05:00:00	715.6950646
17/03/2003 06:00:00	717.0710785
17/03/2003 07:00:00	717.9572264
17/03/2003 08:00:00	718.3668496
17/03/2003 09:00:00	718.3132893
17/03/2003 10:00:00	717.8098868
17/03/2003 11:00:00	716.8699834
17/03/2003 12:00:00	715.5069202
17/03/2003 13:00:00	713.7340386
17/03/2003 14:00:00	711.5646797
17/03/2003 15:00:00	709.0121849
17/03/2003 16:00:00	706.0898954
17/03/2003 17:00:00	702.8111524
17/03/2003 18:00:00	699.1892972
17/03/2003 19:00:00	695.237671
17/03/2003 20:00:00	690.9696151
17/03/2003 21:00:00	686.3984707
17/03/2003 22:00:00	681.5375791
17/03/2003 23:00:00	676.4002816
18/03/2003 00:00:00	670.9999193
18/03/2003 01:00:00	665.3496051
18/03/2003 02:00:00	659.4615374
18/03/2003 03:00:00	653.3476864
18/03/2003 04:00:00	647.0200222
18/03/2003 05:00:00	640.4905148
18/03/2003 06:00:00	633.7711343
18/03/2003 07:00:00	626.8738508
18/03/2003 08:00:00	619.8106344
18/03/2003 09:00:00	612.5934552
18/03/2003 10:00:00	605.2342831
18/03/2003 11:00:00	597.7450885
18/03/2003 12:00:00	590.1378412
18/03/2003 13:00:00	582.4245114
18/03/2003 14:00:00	574.6170692
18/03/2003 15:00:00	566.7274846
18/03/2003 16:00:00	558.7677277
18/03/2003 17:00:00	550.7497687
18/03/2003 18:00:00	542.6855775
18/03/2003 19:00:00	534.5871243
18/03/2003 20:00:00	526.4663791
18/03/2003 21:00:00	518.3353121
18/03/2003 22:00:00	510.2058933
18/03/2003 23:00:00	502.0900928
19/03/2003 00:00:00	493.9998806
19/03/2003 01:00:00	485.946313
19/03/2003 02:00:00	477.9367905
19/03/2003 03:00:00	469.9777999
19/03/2003 04:00:00	462.075828
19/03/2003 05:00:00	454.2373615
19/03/2003 06:00:00	446.4688872
19/03/2003 07:00:00	438.7768918
19/03/2003 08:00:00	431.1678621
19/03/2003 09:00:00	423.6482849
19/03/2003 10:00:00	416.2246469
19/03/2003 11:00:00	408.9034349
19/03/2003 12:00:00	401.6911356
19/03/2003 13:00:00	394.5942359
19/03/2003 14:00:00	387.6192224
19/03/2003 15:00:00	380.772582
19/03/2003 16:00:00	374.0608014
19/03/2003 17:00:00	367.4903673
19/03/2003 18:00:00	361.0677666
19/03/2003 19:00:00	354.7994859
19/03/2003 20:00:00	348.6920121
19/03/2003 21:00:00	342.7518319
19/03/2003 22:00:00	336.9854321
19/03/2003 23:00:00	331.3992994
20/03/2003 00:00:00	325.9999206
20/03/2003 01:00:00	320.791373
20/03/2003 02:00:00	315.7680966
20/03/2003 03:00:00	310.9221223
20/03/2003 04:00:00	306.2454807
20/03/2003 05:00:00	301.7302028
20/03/2003 06:00:00	297.3683193
20/03/2003 07:00:00	293.1518609
20/03/2003 08:00:00	289.0728585
20/03/2003 09:00:00	285.1233428
20/03/2003 10:00:00	281.2953447
20/03/2003 11:00:00	277.5808949
20/03/2003 12:00:00	273.9720242
20/03/2003 13:00:00	270.4607635
20/03/2003 14:00:00	267.0391434
20/03/2003 15:00:00	263.6991949
20/03/2003 16:00:00	260.4329486
20/03/2003 17:00:00	257.2324354
20/03/2003 18:00:00	254.089686
20/03/2003 19:00:00	250.9967313
20/03/2003 20:00:00	247.945602
20/03/2003 21:00:00	244.928329
20/03/2003 22:00:00	241.9369429
20/03/2003 23:00:00	238.9634747
21/03/2003 00:00:00	235.9999551
21/03/2003 01:00:00	233.0402132
21/03/2003 02:00:00	230.0852715
21/03/2003 03:00:00	227.1379507
21/03/2003 04:00:00	224.2010713
21/03/2003 05:00:00	221.277454
21/03/2003 06:00:00	218.3699194
21/03/2003 07:00:00	215.4812881
21/03/2003 08:00:00	212.6143809
21/03/2003 09:00:00	209.7720183
21/03/2003 10:00:00	206.957021
21/03/2003 11:00:00	204.1722096
21/03/2003 12:00:00	201.4204047
21/03/2003 13:00:00	198.704427
21/03/2003 14:00:00	196.0270971
21/03/2003 15:00:00	193.3912356
21/03/2003 16:00:00	190.7996633
21/03/2003 17:00:00	188.2552006
21/03/2003 18:00:00	185.7606684
21/03/2003 19:00:00	183.3188871
21/03/2003 20:00:00	180.9326774
21/03/2003 21:00:00	178.60486
21/03/2003 22:00:00	176.3382555
21/03/2003 23:00:00	174.1356845
22/03/2003 00:00:00	171.9999677
22/03/2003 01:00:00	169.933048
22/03/2003 02:00:00	167.9333578
22/03/2003 03:00:00	165.9984517
22/03/2003 04:00:00	164.1258846
22/03/2003 05:00:00	162.313211
22/03/2003 06:00:00	160.5579858
22/03/2003 07:00:00	158.8577637
22/03/2003 08:00:00	157.2100993
22/03/2003 09:00:00	155.6125474
22/03/2003 10:00:00	154.0626628
22/03/2003 11:00:00	152.5580002
22/03/2003 12:00:00	151.0961142
22/03/2003 13:00:00	149.6745596
22/03/2003 14:00:00	148.2908911
22/03/2003 15:00:00	146.9426635
22/03/2003 16:00:00	145.6274315
22/03/2003 17:00:00	144.3427497
22/03/2003 18:00:00	143.086173
22/03/2003 19:00:00	141.855256
22/03/2003 20:00:00	140.6475534
22/03/2003 21:00:00	139.4606201
22/03/2003 22:00:00	138.2920106
22/03/2003 23:00:00	137.1392798
23/03/2003 00:00:00	135.9999824
23/03/2003 01:00:00	134.8720832
23/03/2003 02:00:00	133.7551882
23/03/2003 03:00:00	132.6493134
23/03/2003 04:00:00	131.5544747
23/03/2003 05:00:00	130.4706883
23/03/2003 06:00:00	129.3979702
23/03/2003 07:00:00	128.3363363
23/03/2003 08:00:00	127.2858027
23/03/2003 09:00:00	126.2463855
23/03/2003 10:00:00	125.2181006
23/03/2003 11:00:00	124.2009642
23/03/2003 12:00:00	123.1949921
23/03/2003 13:00:00	122.2002005
23/03/2003 14:00:00	121.2166054
23/03/2003 15:00:00	120.2442227
23/03/2003 16:00:00	119.2830687
23/03/2003 17:00:00	118.3331591
23/03/2003 18:00:00	117.3945102
23/03/2003 19:00:00	116.4671378
23/03/2003 20:00:00	115.5510582
23/03/2003 21:00:00	114.6462871
23/03/2003 22:00:00	113.7528408
23/03/2003 23:00:00	112.8707352
24/03/2003 00:00:00	111.9999864
24/03/2003 01:00:00	111.1405415
24/03/2003 02:00:00	110.2920729
24/03/2003 03:00:00	109.4541838
24/03/2003 04:00:00	108.6264776
24/03/2003 05:00:00	107.8085577
24/03/2003 06:00:00	107.0000276
24/03/2003 07:00:00	106.2004905
24/03/2003 08:00:00	105.40955
24/03/2003 09:00:00	104.6268093
24/03/2003 10:00:00	103.8518719
24/03/2003 11:00:00	103.0843412
24/03/2003 12:00:00	102.3238205
24/03/2003 13:00:00	101.5699132
24/03/2003 14:00:00	100.8222228
24/03/2003 15:00:00	100.0803526
24/03/2003 16:00:00	99.34390591
24/03/2003 17:00:00	98.61248625
24/03/2003 18:00:00	97.88569696
24/03/2003 19:00:00	97.16314143
24/03/2003 20:00:00	96.44442304
24/03/2003 21:00:00	95.7291452
24/03/2003 22:00:00	95.01691127
24/03/2003 23:00:00	94.30732466
25/03/2003 00:00:00	93.59998874
25/03/2003 01:00:00	92.89461775
25/03/2003 02:00:00	92.19136919
25/03/2003 03:00:00	91.49051139
25/03/2003 04:00:00	90.79231271
25/03/2003 05:00:00	90.09704148
25/03/2003 06:00:00	89.40496602
[truncated: 6,761 more rows]
