# Supplementary material for: Flood Prediction in Ungauged Basins by Physical-Based TOPKAPI Model
Source: Hindawi journal article supplement (doi:10.1155/2019/4795853), 2019-09-05
Supplement: f1 [file 4795853.f1.zip › 4795853.f1/xxdis_2004.csv]

time	50100500
01/01/2004 00:00:00	32.9
01/01/2004 01:00:00	32.97133955
01/01/2004 02:00:00	33.03332074
01/01/2004 03:00:00	33.08627497
01/01/2004 04:00:00	33.13053365
01/01/2004 05:00:00	33.16642818
01/01/2004 06:00:00	33.19428995
01/01/2004 07:00:00	33.21445038
01/01/2004 08:00:00	33.22724086
01/01/2004 09:00:00	33.2329928
01/01/2004 10:00:00	33.2320376
01/01/2004 11:00:00	33.22470665
01/01/2004 12:00:00	33.21133137
01/01/2004 13:00:00	33.19224315
01/01/2004 14:00:00	33.1677734
01/01/2004 15:00:00	33.13825352
01/01/2004 16:00:00	33.10401491
01/01/2004 17:00:00	33.06538897
01/01/2004 18:00:00	33.0227071
01/01/2004 19:00:00	32.97630071
01/01/2004 20:00:00	32.9265012
01/01/2004 21:00:00	32.87363997
01/01/2004 22:00:00	32.81804843
01/01/2004 23:00:00	32.76005796
02/01/2004 00:00:00	32.69999999
02/01/2004 01:00:00	32.6382059
02/01/2004 02:00:00	32.57500711
02/01/2004 03:00:00	32.510735
02/01/2004 04:00:00	32.445721
02/01/2004 05:00:00	32.38029649
02/01/2004 06:00:00	32.31479288
02/01/2004 07:00:00	32.24954157
02/01/2004 08:00:00	32.18487396
02/01/2004 09:00:00	32.12112146
02/01/2004 10:00:00	32.05861547
02/01/2004 11:00:00	31.99768738
02/01/2004 12:00:00	31.93866861
02/01/2004 13:00:00	31.88189055
02/01/2004 14:00:00	31.82768461
02/01/2004 15:00:00	31.77638218
02/01/2004 16:00:00	31.72831468
02/01/2004 17:00:00	31.68381349
02/01/2004 18:00:00	31.64321004
02/01/2004 19:00:00	31.6068357
02/01/2004 20:00:00	31.5750219
02/01/2004 21:00:00	31.54810002
02/01/2004 22:00:00	31.52640148
02/01/2004 23:00:00	31.51025767
03/01/2004 00:00:00	31.5
03/01/2004 01:00:00	31.49584547
03/01/2004 02:00:00	31.49755356
03/01/2004 03:00:00	31.50476934
03/01/2004 04:00:00	31.51713787
03/01/2004 05:00:00	31.53430423
03/01/2004 06:00:00	31.55591349
03/01/2004 07:00:00	31.58161073
03/01/2004 08:00:00	31.61104102
03/01/2004 09:00:00	31.64384944
03/01/2004 10:00:00	31.67968104
03/01/2004 11:00:00	31.71818092
03/01/2004 12:00:00	31.75899414
03/01/2004 13:00:00	31.80176577
03/01/2004 14:00:00	31.8461409
03/01/2004 15:00:00	31.89176458
03/01/2004 16:00:00	31.9382819
03/01/2004 17:00:00	31.98533792
03/01/2004 18:00:00	32.03257772
03/01/2004 19:00:00	32.07964638
03/01/2004 20:00:00	32.12618896
03/01/2004 21:00:00	32.17185055
03/01/2004 22:00:00	32.2162762
03/01/2004 23:00:00	32.259111
04/01/2004 00:00:00	32.30000002
04/01/2004 01:00:00	32.33860463
04/01/2004 02:00:00	32.37465134
04/01/2004 03:00:00	32.40788298
04/01/2004 04:00:00	32.43804238
04/01/2004 05:00:00	32.46487234
04/01/2004 06:00:00	32.4881157
04/01/2004 07:00:00	32.50751526
04/01/2004 08:00:00	32.52281385
04/01/2004 09:00:00	32.53375429
04/01/2004 10:00:00	32.54007939
04/01/2004 11:00:00	32.54153199
04/01/2004 12:00:00	32.53785489
04/01/2004 13:00:00	32.52879092
04/01/2004 14:00:00	32.51408289
04/01/2004 15:00:00	32.49347363
04/01/2004 16:00:00	32.46670595
04/01/2004 17:00:00	32.43352268
04/01/2004 18:00:00	32.39366663
04/01/2004 19:00:00	32.34688062
04/01/2004 20:00:00	32.29290748
04/01/2004 21:00:00	32.23149002
04/01/2004 22:00:00	32.16237106
04/01/2004 23:00:00	32.08529343
05/01/2004 00:00:00	31.99999993
05/01/2004 01:00:00	31.90682516
05/01/2004 02:00:00	31.80847072
05/01/2004 03:00:00	31.70822998
05/01/2004 04:00:00	31.60939633
05/01/2004 05:00:00	31.51526312
05/01/2004 06:00:00	31.42912373
05/01/2004 07:00:00	31.35427152
05/01/2004 08:00:00	31.29399988
05/01/2004 09:00:00	31.25160217
05/01/2004 10:00:00	31.23037177
05/01/2004 11:00:00	31.23360203
05/01/2004 12:00:00	31.26458635
05/01/2004 13:00:00	31.32661807
05/01/2004 14:00:00	31.42299059
05/01/2004 15:00:00	31.55699726
05/01/2004 16:00:00	31.73193146
05/01/2004 17:00:00	31.95108656
05/01/2004 18:00:00	32.21775593
05/01/2004 19:00:00	32.53523295
05/01/2004 20:00:00	32.90681097
05/01/2004 21:00:00	33.33578338
05/01/2004 22:00:00	33.82544355
05/01/2004 23:00:00	34.37908484
06/01/2004 00:00:00	35.00000063
06/01/2004 01:00:00	35.68987497
06/01/2004 02:00:00	36.44395469
06/01/2004 03:00:00	37.2558773
06/01/2004 04:00:00	38.11928031
06/01/2004 05:00:00	39.02780125
06/01/2004 06:00:00	39.97507763
06/01/2004 07:00:00	40.95474696
06/01/2004 08:00:00	41.96044676
06/01/2004 09:00:00	42.98581454
06/01/2004 10:00:00	44.02448783
06/01/2004 11:00:00	45.07010414
06/01/2004 12:00:00	46.11630099
06/01/2004 13:00:00	47.15671588
06/01/2004 14:00:00	48.18498634
06/01/2004 15:00:00	49.19474988
06/01/2004 16:00:00	50.17964402
06/01/2004 17:00:00	51.13330627
06/01/2004 18:00:00	52.04937416
06/01/2004 19:00:00	52.92148519
06/01/2004 20:00:00	53.74327688
06/01/2004 21:00:00	54.50838675
06/01/2004 22:00:00	55.21045232
06/01/2004 23:00:00	55.84311109
07/01/2004 00:00:00	56.4000006
07/01/2004 01:00:00	56.87632141
07/01/2004 02:00:00	57.27352643
07/01/2004 03:00:00	57.59463157
07/01/2004 04:00:00	57.84265279
07/01/2004 05:00:00	58.02060601
07/01/2004 06:00:00	58.13150719
07/01/2004 07:00:00	58.17837226
07/01/2004 08:00:00	58.16421716
07/01/2004 09:00:00	58.09205783
07/01/2004 10:00:00	57.96491021
07/01/2004 11:00:00	57.78579023
07/01/2004 12:00:00	57.55771385
07/01/2004 13:00:00	57.283697
07/01/2004 14:00:00	56.96675561
07/01/2004 15:00:00	56.60990563
07/01/2004 16:00:00	56.216163
07/01/2004 17:00:00	55.78854365
07/01/2004 18:00:00	55.33006354
07/01/2004 19:00:00	54.84373859
07/01/2004 20:00:00	54.33258474
07/01/2004 21:00:00	53.79961794
07/01/2004 22:00:00	53.24785413
07/01/2004 23:00:00	52.68030924
08/01/2004 00:00:00	52.09999921
08/01/2004 01:00:00	51.50968793
08/01/2004 02:00:00	50.91113104
08/01/2004 03:00:00	50.30583213
08/01/2004 04:00:00	49.69529477
08/01/2004 05:00:00	49.08102257
08/01/2004 06:00:00	48.4645191
08/01/2004 07:00:00	47.84728795
08/01/2004 08:00:00	47.23083272
08/01/2004 09:00:00	46.61665698
08/01/2004 10:00:00	46.00626432
08/01/2004 11:00:00	45.40115833
08/01/2004 12:00:00	44.8028426
08/01/2004 13:00:00	44.21282072
08/01/2004 14:00:00	43.63259626
08/01/2004 15:00:00	43.06367282
08/01/2004 16:00:00	42.50755398
08/01/2004 17:00:00	41.96574333
08/01/2004 18:00:00	41.43974446
08/01/2004 19:00:00	40.93106095
08/01/2004 20:00:00	40.4411964
08/01/2004 21:00:00	39.97165438
08/01/2004 22:00:00	39.52393848
08/01/2004 23:00:00	39.09955229
09/01/2004 00:00:00	38.69999941
09/01/2004 01:00:00	38.32651068
09/01/2004 02:00:00	37.97922613
09/01/2004 03:00:00	37.65801302
09/01/2004 04:00:00	37.36273864
09/01/2004 05:00:00	37.09327027
09/01/2004 06:00:00	36.8494752
09/01/2004 07:00:00	36.63122071
09/01/2004 08:00:00	36.43837408
09/01/2004 09:00:00	36.2708026
09/01/2004 10:00:00	36.12837355
09/01/2004 11:00:00	36.01095421
09/01/2004 12:00:00	35.91841187
09/01/2004 13:00:00	35.8506138
09/01/2004 14:00:00	35.80742729
09/01/2004 15:00:00	35.78871963
09/01/2004 16:00:00	35.7943581
09/01/2004 17:00:00	35.82420997
09/01/2004 18:00:00	35.87814254
09/01/2004 19:00:00	35.95602308
09/01/2004 20:00:00	36.05771889
09/01/2004 21:00:00	36.18309724
09/01/2004 22:00:00	36.33202541
09/01/2004 23:00:00	36.50437069
10/01/2004 00:00:00	36.70000036
10/01/2004 01:00:00	36.91898893
10/01/2004 02:00:00	37.16223979
10/01/2004 03:00:00	37.43086355
10/01/2004 04:00:00	37.72597084
10/01/2004 05:00:00	38.04867226
10/01/2004 06:00:00	38.40007843
10/01/2004 07:00:00	38.78129996
10/01/2004 08:00:00	39.19344747
10/01/2004 09:00:00	39.63763157
10/01/2004 10:00:00	40.11496288
10/01/2004 11:00:00	40.62655202
10/01/2004 12:00:00	41.17350958
10/01/2004 13:00:00	41.7569462
10/01/2004 14:00:00	42.37797249
10/01/2004 15:00:00	43.03769905
10/01/2004 16:00:00	43.7372365
10/01/2004 17:00:00	44.47769547
10/01/2004 18:00:00	45.26018656
10/01/2004 19:00:00	46.08582038
10/01/2004 20:00:00	46.95570756
10/01/2004 21:00:00	47.8709587
10/01/2004 22:00:00	48.83268443
10/01/2004 23:00:00	49.84199535
11/01/2004 00:00:00	50.90000208
11/01/2004 01:00:00	52.00682503
11/01/2004 02:00:00	53.15862382
11/01/2004 03:00:00	54.35056787
11/01/2004 04:00:00	55.57782662
11/01/2004 05:00:00	56.83556947
11/01/2004 06:00:00	58.11896587
11/01/2004 07:00:00	59.42318524
11/01/2004 08:00:00	60.743397
11/01/2004 09:00:00	62.07477058
11/01/2004 10:00:00	63.4124754
11/01/2004 11:00:00	64.75168089
11/01/2004 12:00:00	66.08755648
11/01/2004 13:00:00	67.41527158
11/01/2004 14:00:00	68.72999564
11/01/2004 15:00:00	70.02689806
11/01/2004 16:00:00	71.30114829
11/01/2004 17:00:00	72.54791573
11/01/2004 18:00:00	73.76236983
11/01/2004 19:00:00	74.93968
11/01/2004 20:00:00	76.07501567
11/01/2004 21:00:00	77.16354627
11/01/2004 22:00:00	78.20044122
11/01/2004 23:00:00	79.18086994
12/01/2004 00:00:00	80.10000187
12/01/2004 01:00:00	80.95419201
12/01/2004 02:00:00	81.74453766
12/01/2004 03:00:00	82.47332167
12/01/2004 04:00:00	83.14282692
12/01/2004 05:00:00	83.75533626
12/01/2004 06:00:00	84.31313256
12/01/2004 07:00:00	84.81849869
12/01/2004 08:00:00	85.2737175
12/01/2004 09:00:00	85.68107186
12/01/2004 10:00:00	86.04284463
12/01/2004 11:00:00	86.36131867
12/01/2004 12:00:00	86.63877685
12/01/2004 13:00:00	86.87750203
12/01/2004 14:00:00	87.07977708
12/01/2004 15:00:00	87.24788485
12/01/2004 16:00:00	87.38410821
12/01/2004 17:00:00	87.49073003
12/01/2004 18:00:00	87.57003316
12/01/2004 19:00:00	87.62430047
12/01/2004 20:00:00	87.65581482
12/01/2004 21:00:00	87.66685907
12/01/2004 22:00:00	87.6597161
12/01/2004 23:00:00	87.63666875
13/01/2004 00:00:00	87.5999999
13/01/2004 01:00:00	87.55186445
13/01/2004 02:00:00	87.49390544
13/01/2004 03:00:00	87.42763798
13/01/2004 04:00:00	87.35457716
13/01/2004 05:00:00	87.27623807
13/01/2004 06:00:00	87.19413581
13/01/2004 07:00:00	87.10978547
13/01/2004 08:00:00	87.02470215
13/01/2004 09:00:00	86.94040094
13/01/2004 10:00:00	86.85839693
13/01/2004 11:00:00	86.78020522
13/01/2004 12:00:00	86.70734091
13/01/2004 13:00:00	86.64131909
13/01/2004 14:00:00	86.58365485
13/01/2004 15:00:00	86.53586329
13/01/2004 16:00:00	86.4994595
13/01/2004 17:00:00	86.47595857
13/01/2004 18:00:00	86.46687561
13/01/2004 19:00:00	86.4737257
13/01/2004 20:00:00	86.49802395
13/01/2004 21:00:00	86.54128543
13/01/2004 22:00:00	86.60502526
13/01/2004 23:00:00	86.69075852
14/01/2004 00:00:00	86.8000003
14/01/2004 01:00:00	86.93391027
14/01/2004 02:00:00	87.0922263
14/01/2004 03:00:00	87.27433086
14/01/2004 04:00:00	87.4796064
14/01/2004 05:00:00	87.70743537
14/01/2004 06:00:00	87.95720023
14/01/2004 07:00:00	88.22828342
14/01/2004 08:00:00	88.52006741
14/01/2004 09:00:00	88.83193465
14/01/2004 10:00:00	89.16326759
14/01/2004 11:00:00	89.51344868
14/01/2004 12:00:00	89.88186038
14/01/2004 13:00:00	90.26788514
14/01/2004 14:00:00	90.67090542
14/01/2004 15:00:00	91.09030367
14/01/2004 16:00:00	91.52546235
14/01/2004 17:00:00	91.9757639
14/01/2004 18:00:00	92.44059078
14/01/2004 19:00:00	92.91932545
14/01/2004 20:00:00	93.41135036
14/01/2004 21:00:00	93.91604796
14/01/2004 22:00:00	94.43280071
14/01/2004 23:00:00	94.96099106
15/01/2004 00:00:00	95.50000146
15/01/2004 01:00:00	96.04855778
15/01/2004 02:00:00	96.60275954
15/01/2004 03:00:00	97.15804967
15/01/2004 04:00:00	97.70987111
15/01/2004 05:00:00	98.2536668
15/01/2004 06:00:00	98.78487967
15/01/2004 07:00:00	99.29895266
15/01/2004 08:00:00	99.79132871
15/01/2004 09:00:00	100.2574508
15/01/2004 10:00:00	100.6927617
15/01/2004 11:00:00	101.0927046
15/01/2004 12:00:00	101.4527223
15/01/2004 13:00:00	101.7682577
15/01/2004 14:00:00	102.0347538
15/01/2004 15:00:00	102.2476535
15/01/2004 16:00:00	102.4023997
15/01/2004 17:00:00	102.4944355
15/01/2004 18:00:00	102.5192037
15/01/2004 19:00:00	102.4721473
15/01/2004 20:00:00	102.3487092
15/01/2004 21:00:00	102.1443323
15/01/2004 22:00:00	101.8544596
15/01/2004 23:00:00	101.474534
16/01/2004 00:00:00	100.9999985
16/01/2004 01:00:00	100.4282578
16/01/2004 02:00:00	99.76456399
16/01/2004 03:00:00	99.01613092
16/01/2004 04:00:00	98.19017242
16/01/2004 05:00:00	97.29390237
16/01/2004 06:00:00	96.3345346
16/01/2004 07:00:00	95.31928297
16/01/2004 08:00:00	94.25536134
16/01/2004 09:00:00	93.14998355
16/01/2004 10:00:00	92.01036345
16/01/2004 11:00:00	90.84371491
16/01/2004 12:00:00	89.65725177
16/01/2004 13:00:00	88.45818787
16/01/2004 14:00:00	87.25373709
16/01/2004 15:00:00	86.05111326
16/01/2004 16:00:00	84.85753024
16/01/2004 17:00:00	83.68020188
16/01/2004 18:00:00	82.52634204
16/01/2004 19:00:00	81.40316456
16/01/2004 20:00:00	80.3178833
16/01/2004 21:00:00	79.2777121
16/01/2004 22:00:00	78.28986483
16/01/2004 23:00:00	77.36155533
17/01/2004 00:00:00	76.49999746
17/01/2004 01:00:00	75.71058907
17/01/2004 02:00:00	74.9914641
17/01/2004 03:00:00	74.33894052
17/01/2004 04:00:00	73.74933631
17/01/2004 05:00:00	73.21896944
17/01/2004 06:00:00	72.74415789
17/01/2004 07:00:00	72.32121963
17/01/2004 08:00:00	71.94647263
17/01/2004 09:00:00	71.61623487
17/01/2004 10:00:00	71.32682432
17/01/2004 11:00:00	71.07455896
17/01/2004 12:00:00	70.85575676
17/01/2004 13:00:00	70.6667357
17/01/2004 14:00:00	70.50381375
17/01/2004 15:00:00	70.36330888
17/01/2004 16:00:00	70.24153907
17/01/2004 17:00:00	70.1348223
17/01/2004 18:00:00	70.03947653
17/01/2004 19:00:00	69.95181974
17/01/2004 20:00:00	69.86816991
17/01/2004 21:00:00	69.78484501
17/01/2004 22:00:00	69.69816302
17/01/2004 23:00:00	69.6044419
18/01/2004 00:00:00	69.49999964
18/01/2004 01:00:00	69.38184838
18/01/2004 02:00:00	69.24977696
18/01/2004 03:00:00	69.10426839
18/01/2004 04:00:00	68.94580566
18/01/2004 05:00:00	68.77487177
18/01/2004 06:00:00	68.59194973
18/01/2004 07:00:00	68.39752253
18/01/2004 08:00:00	68.19207318
18/01/2004 09:00:00	67.97608467
18/01/2004 10:00:00	67.75004
18/01/2004 11:00:00	67.51442219
18/01/2004 12:00:00	67.26971422
18/01/2004 13:00:00	67.0163991
18/01/2004 14:00:00	66.75495983
18/01/2004 15:00:00	66.48587941
18/01/2004 16:00:00	66.20964083
18/01/2004 17:00:00	65.92672711
18/01/2004 18:00:00	65.63762124
18/01/2004 19:00:00	65.34280622
18/01/2004 20:00:00	65.04276505
18/01/2004 21:00:00	64.73798073
18/01/2004 22:00:00	64.42893627
18/01/2004 23:00:00	64.11611466
19/01/2004 00:00:00	63.7999989
19/01/2004 01:00:00	63.48134828
19/01/2004 02:00:00	63.16202716
19/01/2004 03:00:00	62.84417621
19/01/2004 04:00:00	62.52993605
19/01/2004 05:00:00	62.22144736
19/01/2004 06:00:00	61.92085076
19/01/2004 07:00:00	61.63028692
19/01/2004 08:00:00	61.35189647
19/01/2004 09:00:00	61.08782008
19/01/2004 10:00:00	60.84019838
19/01/2004 11:00:00	60.61117202
19/01/2004 12:00:00	60.40288166
19/01/2004 13:00:00	60.21746794
19/01/2004 14:00:00	60.05707151
19/01/2004 15:00:00	59.92383302
19/01/2004 16:00:00	59.81989312
19/01/2004 17:00:00	59.74739245
19/01/2004 18:00:00	59.70847167
19/01/2004 19:00:00	59.70527142
19/01/2004 20:00:00	59.73993235
19/01/2004 21:00:00	59.8145951
19/01/2004 22:00:00	59.93140034
19/01/2004 23:00:00	60.09248871
20/01/2004 00:00:00	60.30000084
20/01/2004 01:00:00	60.55525469
20/01/2004 02:00:00	60.85627735
20/01/2004 03:00:00	61.20027322
20/01/2004 04:00:00	61.58444672
20/01/2004 05:00:00	62.00600224
20/01/2004 06:00:00	62.4621442
20/01/2004 07:00:00	62.950077
20/01/2004 08:00:00	63.46700504
20/01/2004 09:00:00	64.01013274
20/01/2004 10:00:00	64.57666449
20/01/2004 11:00:00	65.16380471
20/01/2004 12:00:00	65.76875779
20/01/2004 13:00:00	66.38872815
20/01/2004 14:00:00	67.02092019
20/01/2004 15:00:00	67.66253831
20/01/2004 16:00:00	68.31078693
20/01/2004 17:00:00	68.96287045
20/01/2004 18:00:00	69.61599327
20/01/2004 19:00:00	70.26735979
20/01/2004 20:00:00	70.91417444
20/01/2004 21:00:00	71.5536416
20/01/2004 22:00:00	72.18296569
20/01/2004 23:00:00	72.79935111
21/01/2004 00:00:00	73.40000227
21/01/2004 01:00:00	73.98255567
21/01/2004 02:00:00	74.54637616
21/01/2004 03:00:00	75.09126067
21/01/2004 04:00:00	75.61700615
21/01/2004 05:00:00	76.12340953
21/01/2004 06:00:00	76.61026775
21/01/2004 07:00:00	77.07737774
21/01/2004 08:00:00	77.52453643
21/01/2004 09:00:00	77.95154078
21/01/2004 10:00:00	78.35818771
21/01/2004 11:00:00	78.74427415
21/01/2004 12:00:00	79.10959705
21/01/2004 13:00:00	79.45395335
21/01/2004 14:00:00	79.77713997
21/01/2004 15:00:00	80.07895386
21/01/2004 16:00:00	80.35919196
21/01/2004 17:00:00	80.61765119
21/01/2004 18:00:00	80.85412849
21/01/2004 19:00:00	81.06842081
21/01/2004 20:00:00	81.26032508
21/01/2004 21:00:00	81.42963823
21/01/2004 22:00:00	81.5761572
21/01/2004 23:00:00	81.69967893
22/01/2004 00:00:00	81.80000036
22/01/2004 01:00:00	81.8769604
22/01/2004 02:00:00	81.93056589
22/01/2004 03:00:00	81.96086565
22/01/2004 04:00:00	81.9679085
22/01/2004 05:00:00	81.95174327
22/01/2004 06:00:00	81.91241877
22/01/2004 07:00:00	81.84998382
22/01/2004 08:00:00	81.76448725
22/01/2004 09:00:00	81.65597787
22/01/2004 10:00:00	81.52450451
22/01/2004 11:00:00	81.37011597
22/01/2004 12:00:00	81.19286109
22/01/2004 13:00:00	80.99278869
22/01/2004 14:00:00	80.76994758
22/01/2004 15:00:00	80.52438658
22/01/2004 16:00:00	80.25615452
22/01/2004 17:00:00	79.96530021
22/01/2004 18:00:00	79.65187247
22/01/2004 19:00:00	79.31592013
22/01/2004 20:00:00	78.95749201
22/01/2004 21:00:00	78.57663692
22/01/2004 22:00:00	78.17340369
22/01/2004 23:00:00	77.74784113
23/01/2004 00:00:00	77.29999806
23/01/2004 01:00:00	76.83015519
23/01/2004 02:00:00	76.33952072
23/01/2004 03:00:00	75.82953471
23/01/2004 04:00:00	75.30163726
23/01/2004 05:00:00	74.75726842
23/01/2004 06:00:00	74.19786827
23/01/2004 07:00:00	73.6248769
23/01/2004 08:00:00	73.03973437
23/01/2004 09:00:00	72.44388075
23/01/2004 10:00:00	71.83875613
23/01/2004 11:00:00	71.22580058
23/01/2004 12:00:00	70.60645417
23/01/2004 13:00:00	69.98215697
23/01/2004 14:00:00	69.35434907
23/01/2004 15:00:00	68.72447053
23/01/2004 16:00:00	68.09396143
23/01/2004 17:00:00	67.46426185
23/01/2004 18:00:00	66.83681185
23/01/2004 19:00:00	66.21305152
23/01/2004 20:00:00	65.59442093
23/01/2004 21:00:00	64.98236016
23/01/2004 22:00:00	64.37830927
23/01/2004 23:00:00	63.78370834
24/01/2004 00:00:00	63.19999745
24/01/2004 01:00:00	62.62827652
24/01/2004 02:00:00	62.06828491
24/01/2004 03:00:00	61.51942184
24/01/2004 04:00:00	60.98108651
24/01/2004 05:00:00	60.45267814
24/01/2004 06:00:00	59.93359596
24/01/2004 07:00:00	59.42323916
24/01/2004 08:00:00	58.92100697
24/01/2004 09:00:00	58.4262986
24/01/2004 10:00:00	57.93851327
24/01/2004 11:00:00	57.45705019
24/01/2004 12:00:00	56.98130858
24/01/2004 13:00:00	56.51068765
24/01/2004 14:00:00	56.04458662
24/01/2004 15:00:00	55.5824047
24/01/2004 16:00:00	55.12354111
24/01/2004 17:00:00	54.66739505
24/01/2004 18:00:00	54.21336576
24/01/2004 19:00:00	53.76085243
24/01/2004 20:00:00	53.30925429
24/01/2004 21:00:00	52.85797056
24/01/2004 22:00:00	52.40640044
24/01/2004 23:00:00	51.95394315
25/01/2004 00:00:00	51.4999979
25/01/2004 01:00:00	51.04418116
25/01/2004 02:00:00	50.58697834
25/01/2004 03:00:00	50.12909208
25/01/2004 04:00:00	49.67122503
25/01/2004 05:00:00	49.21407985
25/01/2004 06:00:00	48.75835918
25/01/2004 07:00:00	48.30476567
25/01/2004 08:00:00	47.85400197
25/01/2004 09:00:00	47.40677073
25/01/2004 10:00:00	46.9637746
25/01/2004 11:00:00	46.52571623
25/01/2004 12:00:00	46.09329826
25/01/2004 13:00:00	45.66722334
25/01/2004 14:00:00	45.24819413
25/01/2004 15:00:00	44.83691328
25/01/2004 16:00:00	44.43408342
25/01/2004 17:00:00	44.04040722
25/01/2004 18:00:00	43.65658732
25/01/2004 19:00:00	43.28332636
25/01/2004 20:00:00	42.92132701
25/01/2004 21:00:00	42.5712919
25/01/2004 22:00:00	42.23392369
25/01/2004 23:00:00	41.90992502
26/01/2004 00:00:00	41.59999855
26/01/2004 01:00:00	41.30463639
26/01/2004 02:00:00	41.02348856
26/01/2004 03:00:00	40.75599456
26/01/2004 04:00:00	40.50159388
26/01/2004 05:00:00	40.25972602
26/01/2004 06:00:00	40.02983047
26/01/2004 07:00:00	39.81134672
26/01/2004 08:00:00	39.60371427
26/01/2004 09:00:00	39.40637262
26/01/2004 10:00:00	39.21876125
26/01/2004 11:00:00	39.04031967
26/01/2004 12:00:00	38.87048737
26/01/2004 13:00:00	38.70870384
26/01/2004 14:00:00	38.55440857
26/01/2004 15:00:00	38.40704107
26/01/2004 16:00:00	38.26604082
26/01/2004 17:00:00	38.13084733
26/01/2004 18:00:00	38.00090008
26/01/2004 19:00:00	37.87563857
26/01/2004 20:00:00	37.7545023
26/01/2004 21:00:00	37.63693076
26/01/2004 22:00:00	37.52236344
26/01/2004 23:00:00	37.41023984
27/01/2004 00:00:00	37.29999945
27/01/2004 01:00:00	37.19119304
27/01/2004 02:00:00	37.08381642
27/01/2004 03:00:00	36.97797667
27/01/2004 04:00:00	36.87378088
27/01/2004 05:00:00	36.77133612
27/01/2004 06:00:00	36.67074948
27/01/2004 07:00:00	36.57212803
27/01/2004 08:00:00	36.47557887
27/01/2004 09:00:00	36.38120905
27/01/2004 10:00:00	36.28912568
27/01/2004 11:00:00	36.19943583
27/01/2004 12:00:00	36.11224657
27/01/2004 13:00:00	36.027665
27/01/2004 14:00:00	35.94579819
27/01/2004 15:00:00	35.86675322
27/01/2004 16:00:00	35.79063718
27/01/2004 17:00:00	35.71755714
27/01/2004 18:00:00	35.64762018
27/01/2004 19:00:00	35.58093339
27/01/2004 20:00:00	35.51760385
27/01/2004 21:00:00	35.45773863
27/01/2004 22:00:00	35.40144483
27/01/2004 23:00:00	35.34882951
28/01/2004 00:00:00	35.29999976
28/01/2004 01:00:00	35.25500174
28/01/2004 02:00:00	35.21363792
28/01/2004 03:00:00	35.17564987
28/01/2004 04:00:00	35.14077914
28/01/2004 05:00:00	35.10876728
28/01/2004 06:00:00	35.07935586
28/01/2004 07:00:00	35.05228644
28/01/2004 08:00:00	35.02730056
28/01/2004 09:00:00	35.00413979
28/01/2004 10:00:00	34.98254568
28/01/2004 11:00:00	34.96225979
28/01/2004 12:00:00	34.94302368
28/01/2004 13:00:00	34.9245789
28/01/2004 14:00:00	34.90666702
28/01/2004 15:00:00	34.88902959
28/01/2004 16:00:00	34.87140816
28/01/2004 17:00:00	34.8535443
28/01/2004 18:00:00	34.83517955
28/01/2004 19:00:00	34.81605549
28/01/2004 20:00:00	34.79591366
28/01/2004 21:00:00	34.77449563
28/01/2004 22:00:00	34.75154294
28/01/2004 23:00:00	34.72679716
29/01/2004 00:00:00	34.69999985
29/01/2004 01:00:00	34.67095264
29/01/2004 02:00:00	34.63969749
29/01/2004 03:00:00	34.60633644
29/01/2004 04:00:00	34.57097152
29/01/2004 05:00:00	34.53370478
29/01/2004 06:00:00	34.49463825
29/01/2004 07:00:00	34.45387397
29/01/2004 08:00:00	34.41151398
29/01/2004 09:00:00	34.36766031
29/01/2004 10:00:00	34.322415
29/01/2004 11:00:00	34.27588009
29/01/2004 12:00:00	34.22815762
29/01/2004 13:00:00	34.17934962
29/01/2004 14:00:00	34.12955813
29/01/2004 15:00:00	34.0788852
29/01/2004 16:00:00	34.02743285
29/01/2004 17:00:00	33.97530312
29/01/2004 18:00:00	33.92259806
29/01/2004 19:00:00	33.8694197
29/01/2004 20:00:00	33.81587007
29/01/2004 21:00:00	33.76205122
29/01/2004 22:00:00	33.70806519
29/01/2004 23:00:00	33.654014
30/01/2004 00:00:00	33.5999997
30/01/2004 01:00:00	33.5461113
30/01/2004 02:00:00	33.49238573
30/01/2004 03:00:00	33.4388469
30/01/2004 04:00:00	33.3855187
30/01/2004 05:00:00	33.33242503
30/01/2004 06:00:00	33.27958982
30/01/2004 07:00:00	33.22703694
30/01/2004 08:00:00	33.17479032
30/01/2004 09:00:00	33.12287385
30/01/2004 10:00:00	33.07131144
30/01/2004 11:00:00	33.02012699
30/01/2004 12:00:00	32.96934441
30/01/2004 13:00:00	32.91898759
30/01/2004 14:00:00	32.86908045
30/01/2004 15:00:00	32.81964688
30/01/2004 16:00:00	32.77071079
30/01/2004 17:00:00	32.72229608
30/01/2004 18:00:00	32.67442666
30/01/2004 19:00:00	32.62712643
30/01/2004 20:00:00	32.58041929
30/01/2004 21:00:00	32.53432915
30/01/2004 22:00:00	32.48887991
30/01/2004 23:00:00	32.44409547
31/01/2004 00:00:00	32.39999975
31/01/2004 01:00:00	32.35662311
31/01/2004 02:00:00	32.31402185
31/01/2004 03:00:00	32.27225873
31/01/2004 04:00:00	32.23139651
31/01/2004 05:00:00	32.19149797
31/01/2004 06:00:00	32.15262586
31/01/2004 07:00:00	32.11484295
31/01/2004 08:00:00	32.07821201
31/01/2004 09:00:00	32.04279579
31/01/2004 10:00:00	32.00865707
31/01/2004 11:00:00	31.9758586
31/01/2004 12:00:00	31.94446316
31/01/2004 13:00:00	31.91453351
31/01/2004 14:00:00	31.8861324
31/01/2004 15:00:00	31.85932262
31/01/2004 16:00:00	31.83416691
31/01/2004 17:00:00	31.81072805
31/01/2004 18:00:00	31.7890688
31/01/2004 19:00:00	31.76925193
31/01/2004 20:00:00	31.7513402
31/01/2004 21:00:00	31.73539637
31/01/2004 22:00:00	31.72148321
31/01/2004 23:00:00	31.70966348
01/02/2004 00:00:00	31.69999995
01/02/2004 01:00:00	31.69251356
01/02/2004 02:00:00	31.68705798
01/02/2004 03:00:00	31.68344504
01/02/2004 04:00:00	31.6814866
01/02/2004 05:00:00	31.68099449
01/02/2004 06:00:00	31.68178056
01/02/2004 07:00:00	31.68365666
01/02/2004 08:00:00	31.68643461
01/02/2004 09:00:00	31.68992628
01/02/2004 10:00:00	31.6939435
01/02/2004 11:00:00	31.69829812
01/02/2004 12:00:00	31.70280197
01/02/2004 13:00:00	31.70726691
01/02/2004 14:00:00	31.71150477
01/02/2004 15:00:00	31.71532741
01/02/2004 16:00:00	31.71854666
01/02/2004 17:00:00	31.72097436
01/02/2004 18:00:00	31.72242237
01/02/2004 19:00:00	31.72270252
01/02/2004 20:00:00	31.72162665
01/02/2004 21:00:00	31.71900662
01/02/2004 22:00:00	31.71465426
01/02/2004 23:00:00	31.70838142
02/02/2004 00:00:00	31.69999994
02/02/2004 01:00:00	31.68936673
02/02/2004 02:00:00	31.67651895
02/02/2004 03:00:00	31.66153882
02/02/2004 04:00:00	31.64450856
02/02/2004 05:00:00	31.6255104
02/02/2004 06:00:00	31.60462656
02/02/2004 07:00:00	31.58193927
02/02/2004 08:00:00	31.55753073
02/02/2004 09:00:00	31.53148318
02/02/2004 10:00:00	31.50387885
02/02/2004 11:00:00	31.47479994
02/02/2004 12:00:00	31.44432869
02/02/2004 13:00:00	31.41254732
02/02/2004 14:00:00	31.37953804
02/02/2004 15:00:00	31.34538309
02/02/2004 16:00:00	31.31016468
02/02/2004 17:00:00	31.27396504
02/02/2004 18:00:00	31.23686639
02/02/2004 19:00:00	31.19895095
02/02/2004 20:00:00	31.16030095
02/02/2004 21:00:00	31.12099861
02/02/2004 22:00:00	31.08112614
02/02/2004 23:00:00	31.04076578
03/02/2004 00:00:00	30.99999974
03/02/2004 01:00:00	30.95887309
03/02/2004 02:00:00	30.91728225
03/02/2004 03:00:00	30.8750865
03/02/2004 04:00:00	30.83214508
03/02/2004 05:00:00	30.78831728
03/02/2004 06:00:00	30.74346236
03/02/2004 07:00:00	30.69743958
03/02/2004 08:00:00	30.65010821
03/02/2004 09:00:00	30.60132752
03/02/2004 10:00:00	30.55095677
03/02/2004 11:00:00	30.49885523
03/02/2004 12:00:00	30.44488217
03/02/2004 13:00:00	30.38889684
03/02/2004 14:00:00	30.33075853
03/02/2004 15:00:00	30.27032649
03/02/2004 16:00:00	30.20745999
03/02/2004 17:00:00	30.1420183
03/02/2004 18:00:00	30.07386068
03/02/2004 19:00:00	30.0028464
03/02/2004 20:00:00	29.92883473
03/02/2004 21:00:00	29.85168493
03/02/2004 22:00:00	29.77125626
03/02/2004 23:00:00	29.687408
04/02/2004 00:00:00	29.59999942
04/02/2004 01:00:00	29.50921036
04/02/2004 02:00:00	29.41650305
04/02/2004 03:00:00	29.32366028
04/02/2004 04:00:00	29.23246485
04/02/2004 05:00:00	29.14469955
04/02/2004 06:00:00	29.06214718
04/02/2004 07:00:00	28.98659054
04/02/2004 08:00:00	28.91981241
04/02/2004 09:00:00	28.8635956
04/02/2004 10:00:00	28.81972289
04/02/2004 11:00:00	28.7899771
04/02/2004 12:00:00	28.776141
04/02/2004 13:00:00	28.77999741
04/02/2004 14:00:00	28.80332911
04/02/2004 15:00:00	28.84791889
04/02/2004 16:00:00	28.91554956
04/02/2004 17:00:00	29.00800391
04/02/2004 18:00:00	29.12706474
04/02/2004 19:00:00	29.27451484
04/02/2004 20:00:00	29.45213701
04/02/2004 21:00:00	29.66171403
04/02/2004 22:00:00	29.90502872
04/02/2004 23:00:00	30.18386386
05/02/2004 00:00:00	30.50000225
05/02/2004 01:00:00	30.85455295
05/02/2004 02:00:00	31.24593012
05/02/2004 03:00:00	31.67187422
05/02/2004 04:00:00	32.1301257
05/02/2004 05:00:00	32.61842501
05/02/2004 06:00:00	33.13451261
05/02/2004 07:00:00	33.67612896
05/02/2004 08:00:00	34.2410145
05/02/2004 09:00:00	34.82690969
05/02/2004 10:00:00	35.43155498
05/02/2004 11:00:00	36.05269083
05/02/2004 12:00:00	36.6880577
05/02/2004 13:00:00	37.33539603
05/02/2004 14:00:00	37.99244628
05/02/2004 15:00:00	38.65694891
05/02/2004 16:00:00	39.32664436
05/02/2004 17:00:00	39.9992731
05/02/2004 18:00:00	40.67257557
05/02/2004 19:00:00	41.34429224
05/02/2004 20:00:00	42.01216354
05/02/2004 21:00:00	42.67392995
05/02/2004 22:00:00	43.32733191
05/02/2004 23:00:00	43.97010988
06/02/2004 00:00:00	44.6000043
06/02/2004 01:00:00	45.21527811
06/02/2004 02:00:00	45.81628403
06/02/2004 03:00:00	46.40389725
06/02/2004 04:00:00	46.97899294
06/02/2004 05:00:00	47.54244629
06/02/2004 06:00:00	48.09513248
06/02/2004 07:00:00	48.63792668
06/02/2004 08:00:00	49.17170407
06/02/2004 09:00:00	49.69733984
06/02/2004 10:00:00	50.21570917
06/02/2004 11:00:00	50.72768723
06/02/2004 12:00:00	51.2341492
06/02/2004 13:00:00	51.73597026
06/02/2004 14:00:00	52.23402561
06/02/2004 15:00:00	52.7291904
06/02/2004 16:00:00	53.22233983
06/02/2004 17:00:00	53.71434907
06/02/2004 18:00:00	54.2060933
06/02/2004 19:00:00	54.69844771
06/02/2004 20:00:00	55.19228747
06/02/2004 21:00:00	55.68848776
06/02/2004 22:00:00	56.18792377
06/02/2004 23:00:00	56.69147066
07/02/2004 00:00:00	57.20000363
07/02/2004 01:00:00	57.71363279
07/02/2004 02:00:00	58.22940803
07/02/2004 03:00:00	58.74361422
07/02/2004 04:00:00	59.25253624
07/02/2004 05:00:00	59.75245895
07/02/2004 06:00:00	60.23966723
07/02/2004 07:00:00	60.71044593
07/02/2004 08:00:00	61.16107993
07/02/2004 09:00:00	61.5878541
07/02/2004 10:00:00	61.9870533
07/02/2004 11:00:00	62.3549624
07/02/2004 12:00:00	62.68786627
07/02/2004 13:00:00	62.98204979
07/02/2004 14:00:00	63.23379781
07/02/2004 15:00:00	63.4393952
07/02/2004 16:00:00	63.59512684
07/02/2004 17:00:00	63.6972776
07/02/2004 18:00:00	63.74213233
07/02/2004 19:00:00	63.72597591
07/02/2004 20:00:00	63.64509321
07/02/2004 21:00:00	63.4957691
07/02/2004 22:00:00	63.27428844
07/02/2004 23:00:00	62.9769361
08/02/2004 00:00:00	62.59999695
08/02/2004 01:00:00	62.14127368
08/02/2004 02:00:00	61.60464014
08/02/2004 03:00:00	60.99548791
08/02/2004 04:00:00	60.3192086
08/02/2004 05:00:00	59.5811938
08/02/2004 06:00:00	58.78683511
08/02/2004 07:00:00	57.94152413
08/02/2004 08:00:00	57.05065245
08/02/2004 09:00:00	56.11961166
08/02/2004 10:00:00	55.15379338
08/02/2004 11:00:00	54.15858918
08/02/2004 12:00:00	53.13939067
08/02/2004 13:00:00	52.10158945
08/02/2004 14:00:00	51.05057712
08/02/2004 15:00:00	49.99174526
08/02/2004 16:00:00	48.93048547
08/02/2004 17:00:00	47.87218936
08/02/2004 18:00:00	46.82224852
08/02/2004 19:00:00	45.78605454
08/02/2004 20:00:00	44.76899903
08/02/2004 21:00:00	43.77647357
08/02/2004 22:00:00	42.81386977
08/02/2004 23:00:00	41.88657923
09/02/2004 00:00:00	40.99999353
09/02/2004 01:00:00	40.15834311
09/02/2004 02:00:00	39.36121388
09/02/2004 03:00:00	38.60703062
09/02/2004 04:00:00	37.89421811
09/02/2004 05:00:00	37.22120114
09/02/2004 06:00:00	36.5864045
09/02/2004 07:00:00	35.98825297
09/02/2004 08:00:00	35.42517135
09/02/2004 09:00:00	34.89558442
09/02/2004 10:00:00	34.39791696
09/02/2004 11:00:00	33.93059377
09/02/2004 12:00:00	33.49203963
09/02/2004 13:00:00	33.08067933
09/02/2004 14:00:00	32.69493765
09/02/2004 15:00:00	32.33323938
09/02/2004 16:00:00	31.99400932
09/02/2004 17:00:00	31.67567223
09/02/2004 18:00:00	31.37665293
09/02/2004 19:00:00	31.09537618
09/02/2004 20:00:00	30.83026677
09/02/2004 21:00:00	30.57974951
09/02/2004 22:00:00	30.34224916
09/02/2004 23:00:00	30.11619052
10/02/2004 00:00:00	29.89999837
10/02/2004 01:00:00	29.69231628
10/02/2004 02:00:00	29.49266286
10/02/2004 03:00:00	29.30077549
10/02/2004 04:00:00	29.11639156
10/02/2004 05:00:00	28.93924844
10/02/2004 06:00:00	28.76908351
10/02/2004 07:00:00	28.60563415
10/02/2004 08:00:00	28.44863775
10/02/2004 09:00:00	28.29783168
10/02/2004 10:00:00	28.15295333
10/02/2004 11:00:00	28.01374007
10/02/2004 12:00:00	27.87992929
10/02/2004 13:00:00	27.75125836
10/02/2004 14:00:00	27.62746466
10/02/2004 15:00:00	27.50828558
10/02/2004 16:00:00	27.3934585
10/02/2004 17:00:00	27.28272079
10/02/2004 18:00:00	27.17580984
10/02/2004 19:00:00	27.07246303
10/02/2004 20:00:00	26.97241773
10/02/2004 21:00:00	26.87541133
10/02/2004 22:00:00	26.7811812
10/02/2004 23:00:00	26.68946473
11/02/2004 00:00:00	26.5999993
11/02/2004 01:00:00	26.51257688
11/02/2004 02:00:00	26.42720781
11/02/2004 03:00:00	26.34395702
11/02/2004 04:00:00	26.26288943
11/02/2004 05:00:00	26.18406997
11/02/2004 06:00:00	26.10756357
11/02/2004 07:00:00	26.03343517
11/02/2004 08:00:00	25.96174967
11/02/2004 09:00:00	25.89257203
11/02/2004 10:00:00	25.82596715
11/02/2004 11:00:00	25.76199998
11/02/2004 12:00:00	25.70073544
11/02/2004 13:00:00	25.64223845
11/02/2004 14:00:00	25.58657395
11/02/2004 15:00:00	25.53380687
11/02/2004 16:00:00	25.48400212
11/02/2004 17:00:00	25.43722465
11/02/2004 18:00:00	25.39353937
11/02/2004 19:00:00	25.35301122
11/02/2004 20:00:00	25.31570512
11/02/2004 21:00:00	25.281686
11/02/2004 22:00:00	25.25101879
11/02/2004 23:00:00	25.22376842
12/02/2004 00:00:00	25.19999982
12/02/2004 01:00:00	25.17971694
12/02/2004 02:00:00	25.16267984
12/02/2004 03:00:00	25.1485876
12/02/2004 04:00:00	25.13713932
12/02/2004 05:00:00	25.12803408
12/02/2004 06:00:00	25.12097097
12/02/2004 07:00:00	25.11564909
12/02/2004 08:00:00	25.11176751
12/02/2004 09:00:00	25.10902532
12/02/2004 10:00:00	25.10712162
12/02/2004 11:00:00	25.10575549
12/02/2004 12:00:00	25.10462602
12/02/2004 13:00:00	25.10343229
12/02/2004 14:00:00	25.1018734
12/02/2004 15:00:00	25.09964844
12/02/2004 16:00:00	25.09645648
12/02/2004 17:00:00	25.09199663
12/02/2004 18:00:00	25.08596796
12/02/2004 19:00:00	25.07806956
12/02/2004 20:00:00	25.06800053
12/02/2004 21:00:00	25.05545996
12/02/2004 22:00:00	25.04014692
12/02/2004 23:00:00	25.0217605
13/02/2004 00:00:00	24.99999981
13/02/2004 01:00:00	24.97465918
13/02/2004 02:00:00	24.94591402
13/02/2004 03:00:00	24.914035
13/02/2004 04:00:00	24.87929278
13/02/2004 05:00:00	24.84195802
13/02/2004 06:00:00	24.8023014
13/02/2004 07:00:00	24.76059357
13/02/2004 08:00:00	24.7171052
13/02/2004 09:00:00	24.67210695
13/02/2004 10:00:00	24.62586949
13/02/2004 11:00:00	24.57866347
13/02/2004 12:00:00	24.53075958
13/02/2004 13:00:00	24.48242847
13/02/2004 14:00:00	24.4339408
13/02/2004 15:00:00	24.38556723
13/02/2004 16:00:00	24.33757845
13/02/2004 17:00:00	24.2902451
13/02/2004 18:00:00	24.24383785
13/02/2004 19:00:00	24.19862737
13/02/2004 20:00:00	24.15488432
13/02/2004 21:00:00	24.11287936
13/02/2004 22:00:00	24.07288317
13/02/2004 23:00:00	24.0351664
14/02/2004 00:00:00	23.99999971
14/02/2004 01:00:00	23.96760859
14/02/2004 02:00:00	23.93803772
14/02/2004 03:00:00	23.91128661
14/02/2004 04:00:00	23.88735476
14/02/2004 05:00:00	23.86624169
14/02/2004 06:00:00	23.84794688
14/02/2004 07:00:00	23.83246986
14/02/2004 08:00:00	23.81981011
14/02/2004 09:00:00	23.80996715
14/02/2004 10:00:00	23.80294049
14/02/2004 11:00:00	23.79872962
14/02/2004 12:00:00	23.79733405
14/02/2004 13:00:00	23.79875328
14/02/2004 14:00:00	23.80298683
14/02/2004 15:00:00	23.81003418
14/02/2004 16:00:00	23.81989486
14/02/2004 17:00:00	23.83256836
14/02/2004 18:00:00	23.84805419
14/02/2004 19:00:00	23.86635185
14/02/2004 20:00:00	23.88746085
14/02/2004 21:00:00	23.91138068
14/02/2004 22:00:00	23.93811087
14/02/2004 23:00:00	23.9676509
15/02/2004 00:00:00	24.00000029
15/02/2004 01:00:00	24.03511384
15/02/2004 02:00:00	24.07276757
15/02/2004 03:00:00	24.11269278
15/02/2004 04:00:00	24.15462081
15/02/2004 05:00:00	24.19828296
15/02/2004 06:00:00	24.24341056
15/02/2004 07:00:00	24.28973492
15/02/2004 08:00:00	24.33698736
15/02/2004 09:00:00	24.38489919
15/02/2004 10:00:00	24.43320174
15/02/2004 11:00:00	24.48162632
15/02/2004 12:00:00	24.52990425
15/02/2004 13:00:00	24.57776685
15/02/2004 14:00:00	24.62494543
15/02/2004 15:00:00	24.67117131
15/02/2004 16:00:00	24.71617582
15/02/2004 17:00:00	24.75969025
15/02/2004 18:00:00	24.80144595
15/02/2004 19:00:00	24.84117421
15/02/2004 20:00:00	24.87860636
15/02/2004 21:00:00	24.91347372
15/02/2004 22:00:00	24.9455076
15/02/2004 23:00:00	24.97443933
16/02/2004 00:00:00	25.00000021
16/02/2004 01:00:00	25.02195024
16/02/2004 02:00:00	25.0401641
16/02/2004 03:00:00	25.05454514
16/02/2004 04:00:00	25.06499671
16/02/2004 05:00:00	25.07142216
16/02/2004 06:00:00	25.07372484
16/02/2004 07:00:00	25.0718081
16/02/2004 08:00:00	25.06557529
16/02/2004 09:00:00	25.05492976
16/02/2004 10:00:00	25.03977487
16/02/2004 11:00:00	25.02001396
16/02/2004 12:00:00	24.99555039
16/02/2004 13:00:00	24.9662875
16/02/2004 14:00:00	24.93212864
16/02/2004 15:00:00	24.89297717
16/02/2004 16:00:00	24.84873644
16/02/2004 17:00:00	24.7993098
16/02/2004 18:00:00	24.74460059
16/02/2004 19:00:00	24.68451217
16/02/2004 20:00:00	24.61894789
16/02/2004 21:00:00	24.5478111
16/02/2004 22:00:00	24.47100515
16/02/2004 23:00:00	24.38843339
17/02/2004 00:00:00	24.29999918
17/02/2004 01:00:00	24.20570947
17/02/2004 02:00:00	24.10598574
17/02/2004 03:00:00	24.00135305
17/02/2004 04:00:00	23.89233647
17/02/2004 05:00:00	23.77946107
17/02/2004 06:00:00	23.66325194
17/02/2004 07:00:00	23.54423413
17/02/2004 08:00:00	23.42293272
17/02/2004 09:00:00	23.29987278
17/02/2004 10:00:00	23.17557939
17/02/2004 11:00:00	23.05057761
17/02/2004 12:00:00	22.92539253
17/02/2004 13:00:00	22.8005492
17/02/2004 14:00:00	22.6765727
17/02/2004 15:00:00	22.5539881
17/02/2004 16:00:00	22.43332048
17/02/2004 17:00:00	22.31509491
17/02/2004 18:00:00	22.19983645
17/02/2004 19:00:00	22.08807019
17/02/2004 20:00:00	21.98032119
17/02/2004 21:00:00	21.87711452
17/02/2004 22:00:00	21.77897525
17/02/2004 23:00:00	21.68642847
18/02/2004 00:00:00	21.59999923
18/02/2004 01:00:00	21.52004435
18/02/2004 02:00:00	21.44624753
18/02/2004 03:00:00	21.37812424
18/02/2004 04:00:00	21.31518995
18/02/2004 05:00:00	21.2569601
18/02/2004 06:00:00	21.20295016
18/02/2004 07:00:00	21.15267559
18/02/2004 08:00:00	21.10565185
18/02/2004 09:00:00	21.0613944
18/02/2004 10:00:00	21.01941869
18/02/2004 11:00:00	20.97924019
18/02/2004 12:00:00	20.94037435
18/02/2004 13:00:00	20.90233664
18/02/2004 14:00:00	20.86464251
18/02/2004 15:00:00	20.82680743
18/02/2004 16:00:00	20.78834684
18/02/2004 17:00:00	20.74877622
18/02/2004 18:00:00	20.70761102
18/02/2004 19:00:00	20.6643667
18/02/2004 20:00:00	20.61855873
18/02/2004 21:00:00	20.56970255
18/02/2004 22:00:00	20.51731363
18/02/2004 23:00:00	20.46090743
19/02/2004 00:00:00	20.3999994
19/02/2004 01:00:00	20.33439236
19/02/2004 02:00:00	20.26503845
19/02/2004 03:00:00	20.19317716
19/02/2004 04:00:00	20.12004795
19/02/2004 05:00:00	20.04689032
19/02/2004 06:00:00	19.97494374
19/02/2004 07:00:00	19.90544769
19/02/2004 08:00:00	19.83964165
19/02/2004 09:00:00	19.7787651
19/02/2004 10:00:00	19.72405751
19/02/2004 11:00:00	19.67675838
19/02/2004 12:00:00	19.63810718
19/02/2004 13:00:00	19.60934338
19/02/2004 14:00:00	19.59170647
19/02/2004 15:00:00	19.58643593
19/02/2004 16:00:00	19.59477123
19/02/2004 17:00:00	19.61795186
19/02/2004 18:00:00	19.65721729
19/02/2004 19:00:00	19.71380701
19/02/2004 20:00:00	19.7889605
19/02/2004 21:00:00	19.88391723
19/02/2004 22:00:00	19.99991668
19/02/2004 23:00:00	20.13819833
20/02/2004 00:00:00	20.30000167
20/02/2004 01:00:00	20.48604804
20/02/2004 02:00:00	20.69498633
20/02/2004 03:00:00	20.92494733
20/02/2004 04:00:00	21.17406184
20/02/2004 05:00:00	21.44046063
20/02/2004 06:00:00	21.7222745
20/02/2004 07:00:00	22.01763424
20/02/2004 08:00:00	22.32467063
20/02/2004 09:00:00	22.64151447
20/02/2004 10:00:00	22.96629655
20/02/2004 11:00:00	23.29714765
20/02/2004 12:00:00	23.63219856
20/02/2004 13:00:00	23.96958008
20/02/2004 14:00:00	24.30742299
20/02/2004 15:00:00	24.64385808
20/02/2004 16:00:00	24.97701614
20/02/2004 17:00:00	25.30502795
20/02/2004 18:00:00	25.62602432
20/02/2004 19:00:00	25.93813603
20/02/2004 20:00:00	26.23949386
20/02/2004 21:00:00	26.52822861
20/02/2004 22:00:00	26.80247107
20/02/2004 23:00:00	27.06035202
21/02/2004 00:00:00	27.30000225
21/02/2004 01:00:00	27.52031774
21/02/2004 02:00:00	27.72325508
21/02/2004 03:00:00	27.91153602
21/02/2004 04:00:00	28.0878823
21/02/2004 05:00:00	28.25501564
21/02/2004 06:00:00	28.4156578
21/02/2004 07:00:00	28.57253051
21/02/2004 08:00:00	28.7283555
21/02/2004 09:00:00	28.88585452
21/02/2004 10:00:00	29.04774931
21/02/2004 11:00:00	29.2167616
21/02/2004 12:00:00	29.39561314
21/02/2004 13:00:00	29.58702565
21/02/2004 14:00:00	29.79372089
21/02/2004 15:00:00	30.01842058
21/02/2004 16:00:00	30.26384647
21/02/2004 17:00:00	30.53272029
21/02/2004 18:00:00	30.82776379
21/02/2004 19:00:00	31.1516987
21/02/2004 20:00:00	31.50724677
21/02/2004 21:00:00	31.89712972
21/02/2004 22:00:00	32.3240693
21/02/2004 23:00:00	32.79078725
22/02/2004 00:00:00	33.30000531
22/02/2004 01:00:00	33.85342175
22/02/2004 02:00:00	34.4486412
22/02/2004 03:00:00	35.08224485
22/02/2004 04:00:00	35.75081394
22/02/2004 05:00:00	36.45092967
22/02/2004 06:00:00	37.17917325
22/02/2004 07:00:00	37.93212591
22/02/2004 08:00:00	38.70636886
22/02/2004 09:00:00	39.4984833
22/02/2004 10:00:00	40.30505047
22/02/2004 11:00:00	41.12265156
22/02/2004 12:00:00	41.94786781
22/02/2004 13:00:00	42.77728041
22/02/2004 14:00:00	43.6074706
22/02/2004 15:00:00	44.43501957
22/02/2004 16:00:00	45.25650855
22/02/2004 17:00:00	46.06851875
22/02/2004 18:00:00	46.86763139
22/02/2004 19:00:00	47.65042768
22/02/2004 20:00:00	48.41348884
22/02/2004 21:00:00	49.15339608
22/02/2004 22:00:00	49.86673061
22/02/2004 23:00:00	50.55007366
23/02/2004 00:00:00	51.20000643
23/02/2004 01:00:00	51.81380559
23/02/2004 02:00:00	52.39152948
23/02/2004 03:00:00	52.93393185
23/02/2004 04:00:00	53.44176645
23/02/2004 05:00:00	53.91578702
23/02/2004 06:00:00	54.35674733
23/02/2004 07:00:00	54.76540111
23/02/2004 08:00:00	55.14250211
23/02/2004 09:00:00	55.48880409
23/02/2004 10:00:00	55.80506079
23/02/2004 11:00:00	56.09202596
23/02/2004 12:00:00	56.35045335
23/02/2004 13:00:00	56.58109671
23/02/2004 14:00:00	56.78470978
23/02/2004 15:00:00	56.96204632
23/02/2004 16:00:00	57.11386007
23/02/2004 17:00:00	57.24090479
23/02/2004 18:00:00	57.34393421
23/02/2004 19:00:00	57.4237021
23/02/2004 20:00:00	57.4809622
23/02/2004 21:00:00	57.51646825
23/02/2004 22:00:00	57.53097401
23/02/2004 23:00:00	57.52523322
24/02/2004 00:00:00	57.49999964
24/02/2004 01:00:00	57.45600485
24/02/2004 02:00:00	57.39389182
24/02/2004 03:00:00	57.31428135
24/02/2004 04:00:00	57.21779424
24/02/2004 05:00:00	57.10505129
24/02/2004 06:00:00	56.97667332
24/02/2004 07:00:00	56.83328113
24/02/2004 08:00:00	56.67549551
24/02/2004 09:00:00	56.50393728
24/02/2004 10:00:00	56.31922724
24/02/2004 11:00:00	56.12198619
24/02/2004 12:00:00	55.91283494
24/02/2004 13:00:00	55.69239429
24/02/2004 14:00:00	55.46128504
24/02/2004 15:00:00	55.220128
24/02/2004 16:00:00	54.96954398
24/02/2004 17:00:00	54.71015377
24/02/2004 18:00:00	54.44257819
24/02/2004 19:00:00	54.16743803
24/02/2004 20:00:00	53.8853541
24/02/2004 21:00:00	53.59694721
24/02/2004 22:00:00	53.30283815
24/02/2004 23:00:00	53.00364774
25/02/2004 00:00:00	52.69999677
25/02/2004 01:00:00	52.3925069
25/02/2004 02:00:00	52.08180317
25/02/2004 03:00:00	51.76851145
25/02/2004 04:00:00	51.45325762
25/02/2004 05:00:00	51.13666758
25/02/2004 06:00:00	50.81936719
25/02/2004 07:00:00	50.50198235
25/02/2004 08:00:00	50.18513894
25/02/2004 09:00:00	49.86946282
25/02/2004 10:00:00	49.5555799
25/02/2004 11:00:00	49.24411605
25/02/2004 12:00:00	48.93569715
25/02/2004 13:00:00	48.63094909
25/02/2004 14:00:00	48.33049774
25/02/2004 15:00:00	48.03496899
25/02/2004 16:00:00	47.74498871
25/02/2004 17:00:00	47.46118281
25/02/2004 18:00:00	47.18417714
25/02/2004 19:00:00	46.9145976
25/02/2004 20:00:00	46.65307007
25/02/2004 21:00:00	46.40022043
25/02/2004 22:00:00	46.15667456
25/02/2004 23:00:00	45.92305834
26/02/2004 00:00:00	45.69999766
26/02/2004 01:00:00	45.48790568
26/02/2004 02:00:00	45.28634473
26/02/2004 03:00:00	45.09466444
26/02/2004 04:00:00	44.91221443
26/02/2004 05:00:00	44.73834433
26/02/2004 06:00:00	44.57240376
26/02/2004 07:00:00	44.41374236
26/02/2004 08:00:00	44.26170975
26/02/2004 09:00:00	44.11565556
26/02/2004 10:00:00	43.9749294
26/02/2004 11:00:00	43.83888092
26/02/2004 12:00:00	43.70685973
26/02/2004 13:00:00	43.57821546
26/02/2004 14:00:00	43.45229774
26/02/2004 15:00:00	43.32845619
26/02/2004 16:00:00	43.20604045
26/02/2004 17:00:00	43.08440013
26/02/2004 18:00:00	42.96288486
26/02/2004 19:00:00	42.84084428
26/02/2004 20:00:00	42.71762801
26/02/2004 21:00:00	42.59258566
26/02/2004 22:00:00	42.46506688
26/02/2004 23:00:00	42.33442129
27/02/2004 00:00:00	42.19999851
27/02/2004 01:00:00	42.06132542
27/02/2004 02:00:00	41.91863789
27/02/2004 03:00:00	41.77234904
27/02/2004 04:00:00	41.62287198
27/02/2004 05:00:00	41.47061981
27/02/2004 06:00:00	41.31600566
27/02/2004 07:00:00	41.15944263
27/02/2004 08:00:00	41.00134384
27/02/2004 09:00:00	40.84212239
27/02/2004 10:00:00	40.68219141
27/02/2004 11:00:00	40.52196399
27/02/2004 12:00:00	40.36185326
27/02/2004 13:00:00	40.20227233
27/02/2004 14:00:00	40.0436343
27/02/2004 15:00:00	39.8863523
27/02/2004 16:00:00	39.73083942
27/02/2004 17:00:00	39.57750879
27/02/2004 18:00:00	39.42677352
27/02/2004 19:00:00	39.27904671
27/02/2004 20:00:00	39.13474148
27/02/2004 21:00:00	38.99427095
27/02/2004 22:00:00	38.85804822
27/02/2004 23:00:00	38.72648641
28/02/2004 00:00:00	38.59999862
28/02/2004 01:00:00	38.47887062
28/02/2004 02:00:00	38.36287871
28/02/2004 03:00:00	38.25167187
28/02/2004 04:00:00	38.14489906
28/02/2004 05:00:00	38.04220925
28/02/2004 06:00:00	37.94325141
28/02/2004 07:00:00	37.8476745
28/02/2004 08:00:00	37.75512749
28/02/2004 09:00:00	37.66525935
28/02/2004 10:00:00	37.57771905
28/02/2004 11:00:00	37.49215555
28/02/2004 12:00:00	37.40821781
28/02/2004 13:00:00	37.32555481
28/02/2004 14:00:00	37.24381552
28/02/2004 15:00:00	37.16264889
28/02/2004 16:00:00	37.0817039
28/02/2004 17:00:00	37.00062952
28/02/2004 18:00:00	36.9190747
28/02/2004 19:00:00	36.83668842
28/02/2004 20:00:00	36.75311965
28/02/2004 21:00:00	36.66801735
28/02/2004 22:00:00	36.58103049
28/02/2004 23:00:00	36.49180803
29/02/2004 00:00:00	36.39999894
29/02/2004 01:00:00	36.30534567
29/02/2004 02:00:00	36.20796451
29/02/2004 03:00:00	36.10806524
29/02/2004 04:00:00	36.00585762
29/02/2004 05:00:00	35.90155143
29/02/2004 06:00:00	35.79535643
29/02/2004 07:00:00	35.6874824
29/02/2004 08:00:00	35.57813911
29/02/2004 09:00:00	35.46753632
29/02/2004 10:00:00	35.35588381
29/02/2004 11:00:00	35.24339134
29/02/2004 12:00:00	35.13026869
29/02/2004 13:00:00	35.01672562
29/02/2004 14:00:00	34.90297192
29/02/2004 15:00:00	34.78921733
29/02/2004 16:00:00	34.67567165
29/02/2004 17:00:00	34.56254463
29/02/2004 18:00:00	34.45004604
29/02/2004 19:00:00	34.33838566
29/02/2004 20:00:00	34.22777326
29/02/2004 21:00:00	34.1184186
29/02/2004 22:00:00	34.01053146
29/02/2004 23:00:00	33.90432161
01/03/2004 00:00:00	33.79999881
01/03/2004 01:00:00	33.69774334
01/03/2004 02:00:00	33.59761748
01/03/2004 03:00:00	33.49965402
01/03/2004 04:00:00	33.40388573
01/03/2004 05:00:00	33.31034542
01/03/2004 06:00:00	33.21906587
01/03/2004 07:00:00	33.13007985
01/03/2004 08:00:00	33.04342017
01/03/2004 09:00:00	32.9591196
01/03/2004 10:00:00	32.87721093
01/03/2004 11:00:00	32.79772695
01/03/2004 12:00:00	32.72070044
01/03/2004 13:00:00	32.64616419
01/03/2004 14:00:00	32.57415098
01/03/2004 15:00:00	32.50469361
01/03/2004 16:00:00	32.43782486
01/03/2004 17:00:00	32.37357752
01/03/2004 18:00:00	32.31198436
01/03/2004 19:00:00	32.25307819
01/03/2004 20:00:00	32.19689177
01/03/2004 21:00:00	32.14345791
01/03/2004 22:00:00	32.09280939
01/03/2004 23:00:00	32.04497898
02/03/2004 00:00:00	31.99999949
02/03/2004 01:00:00	31.95782694
02/03/2004 02:00:00	31.91811036
02/03/2004 03:00:00	31.88042203
02/03/2004 04:00:00	31.84433422
02/03/2004 05:00:00	31.80941922
02/03/2004 06:00:00	31.77524931
02/03/2004 07:00:00	31.74139676
02/03/2004 08:00:00	31.70743386
02/03/2004 09:00:00	31.67293288
02/03/2004 10:00:00	31.63746611
02/03/2004 11:00:00	31.60060581
02/03/2004 12:00:00	31.56192428
02/03/2004 13:00:00	31.52099379
02/03/2004 14:00:00	31.47738661
02/03/2004 15:00:00	31.43067504
02/03/2004 16:00:00	31.38043134
02/03/2004 17:00:00	31.3262278
02/03/2004 18:00:00	31.26763669
02/03/2004 19:00:00	31.2042303
02/03/2004 20:00:00	31.1355809
02/03/2004 21:00:00	31.06126078
02/03/2004 22:00:00	30.98084221
02/03/2004 23:00:00	30.89389747
03/03/2004 00:00:00	30.79999884
03/03/2004 01:00:00	30.6988815
03/03/2004 02:00:00	30.59093218
03/03/2004 03:00:00	30.47670051
03/03/2004 04:00:00	30.35673613
03/03/2004 05:00:00	30.23158864
03/03/2004 06:00:00	30.10180767
03/03/2004 07:00:00	29.96794286
03/03/2004 08:00:00	29.83054383
03/03/2004 09:00:00	29.69016019
03/03/2004 10:00:00	29.54734158
03/03/2004 11:00:00	29.40263762
03/03/2004 12:00:00	29.25659793
03/03/2004 13:00:00	29.10977215
03/03/2004 14:00:00	28.96270988
03/03/2004 15:00:00	28.81596077
03/03/2004 16:00:00	28.67007443
03/03/2004 17:00:00	28.52560049
03/03/2004 18:00:00	28.38308858
03/03/2004 19:00:00	28.24308831
03/03/2004 20:00:00	28.10614932
03/03/2004 21:00:00	27.97282123
03/03/2004 22:00:00	27.84365366
03/03/2004 23:00:00	27.71919624
04/03/2004 00:00:00	27.59999859
04/03/2004 01:00:00	27.486607
04/03/2004 02:00:00	27.37955437
04/03/2004 03:00:00	27.27937028
04/03/2004 04:00:00	27.1865843
04/03/2004 05:00:00	27.10172598
04/03/2004 06:00:00	27.02532491
04/03/2004 07:00:00	26.95791065
04/03/2004 08:00:00	26.90001276
04/03/2004 09:00:00	26.85216083
04/03/2004 10:00:00	26.81488441
04/03/2004 11:00:00	26.78871307
04/03/2004 12:00:00	26.77417639
04/03/2004 13:00:00	26.77180393
04/03/2004 14:00:00	26.78212526
04/03/2004 15:00:00	26.80566995
04/03/2004 16:00:00	26.84296756
04/03/2004 17:00:00	26.89454768
04/03/2004 18:00:00	26.96093986
04/03/2004 19:00:00	27.04267367
04/03/2004 20:00:00	27.14027869
04/03/2004 21:00:00	27.25428448
04/03/2004 22:00:00	27.38522061
04/03/2004 23:00:00	27.53361664
05/03/2004 00:00:00	27.70000216
05/03/2004 01:00:00	27.88446783
05/03/2004 02:00:00	28.08534885
05/03/2004 03:00:00	28.30054156
05/03/2004 04:00:00	28.5279423
05/03/2004 05:00:00	28.76544739
05/03/2004 06:00:00	29.01095318
05/03/2004 07:00:00	29.262356
05/03/2004 08:00:00	29.51755219
05/03/2004 09:00:00	29.77443809
05/03/2004 10:00:00	30.03091003
05/03/2004 11:00:00	30.28486435
05/03/2004 12:00:00	30.53419739
05/03/2004 13:00:00	30.77680548
05/03/2004 14:00:00	31.01058496
05/03/2004 15:00:00	31.23343216
05/03/2004 16:00:00	31.44324343
05/03/2004 17:00:00	31.63791509
05/03/2004 18:00:00	31.81534349
05/03/2004 19:00:00	31.97342496
05/03/2004 20:00:00	32.11005584
05/03/2004 21:00:00	32.22313247
05/03/2004 22:00:00	32.31055117
05/03/2004 23:00:00	32.3702083
06/03/2004 00:00:00	32.40000018
06/03/2004 01:00:00	32.3985114
06/03/2004 02:00:00	32.36707948
06/03/2004 03:00:00	32.30773012
06/03/2004 04:00:00	32.22248903
06/03/2004 05:00:00	32.11338192
06/03/2004 06:00:00	31.98243451
06/03/2004 07:00:00	31.8316725
06/03/2004 08:00:00	31.6631216
06/03/2004 09:00:00	31.47880753
06/03/2004 10:00:00	31.28075598
06/03/2004 11:00:00	31.07099268
06/03/2004 12:00:00	30.85154333
06/03/2004 13:00:00	30.62443365
06/03/2004 14:00:00	30.39168933
06/03/2004 15:00:00	30.1553361
06/03/2004 16:00:00	29.91739966
06/03/2004 17:00:00	29.67990572
06/03/2004 18:00:00	29.44487999
06/03/2004 19:00:00	29.21434819
06/03/2004 20:00:00	28.99033602
06/03/2004 21:00:00	28.77486919
06/03/2004 22:00:00	28.56997341
06/03/2004 23:00:00	28.37767439
07/03/2004 00:00:00	28.19999785
07/03/2004 01:00:00	28.03844941
07/03/2004 02:00:00	27.89245444
07/03/2004 03:00:00	27.76091829
07/03/2004 04:00:00	27.6427463
07/03/2004 05:00:00	27.5368438
07/03/2004 06:00:00	27.44211613
07/03/2004 07:00:00	27.35746863
07/03/2004 08:00:00	27.28180664
07/03/2004 09:00:00	27.21403548
07/03/2004 10:00:00	27.15306051
07/03/2004 11:00:00	27.09778706
07/03/2004 12:00:00	27.04712046
07/03/2004 13:00:00	26.99996605
07/03/2004 14:00:00	26.95522918
07/03/2004 15:00:00	26.91181517
07/03/2004 16:00:00	26.86862937
07/03/2004 17:00:00	26.82457712
07/03/2004 18:00:00	26.77856374
07/03/2004 19:00:00	26.72949458
07/03/2004 20:00:00	26.67627498
07/03/2004 21:00:00	26.61781028
07/03/2004 22:00:00	26.5530058
07/03/2004 23:00:00	26.4807669
08/03/2004 00:00:00	26.3999989
08/03/2004 01:00:00	26.30995751
08/03/2004 02:00:00	26.21129985
08/03/2004 03:00:00	26.10503337
08/03/2004 04:00:00	25.99216551
08/03/2004 05:00:00	25.87370375
08/03/2004 06:00:00	25.75065552
08/03/2004 07:00:00	25.62402829
08/03/2004 08:00:00	25.4948295
08/03/2004 09:00:00	25.36406661
08/03/2004 10:00:00	25.23274707
08/03/2004 11:00:00	25.10187834
08/03/2004 12:00:00	24.97246788
08/03/2004 13:00:00	24.84552312
08/03/2004 14:00:00	24.72205153
08/03/2004 15:00:00	24.60306057
08/03/2004 16:00:00	24.48955768
08/03/2004 17:00:00	24.38255031
08/03/2004 18:00:00	24.28304593
08/03/2004 19:00:00	24.19205199
08/03/2004 20:00:00	24.11057593
08/03/2004 21:00:00	24.03962521
08/03/2004 22:00:00	23.98020729
08/03/2004 23:00:00	23.93332962
09/03/2004 00:00:00	23.89999966
09/03/2004 01:00:00	23.88090772
09/03/2004 02:00:00	23.8754757
09/03/2004 03:00:00	23.88280836
09/03/2004 04:00:00	23.90201049
09/03/2004 05:00:00	23.93218687
09/03/2004 06:00:00	23.97244228
09/03/2004 07:00:00	24.02188149
09/03/2004 08:00:00	24.07960928
09/03/2004 09:00:00	24.14473044
09/03/2004 10:00:00	24.21634974
09/03/2004 11:00:00	24.29357195
09/03/2004 12:00:00	24.37550187
09/03/2004 13:00:00	24.46124426
09/03/2004 14:00:00	24.54990391
09/03/2004 15:00:00	24.6405856
09/03/2004 16:00:00	24.7323941
09/03/2004 17:00:00	24.82443419
09/03/2004 18:00:00	24.91581066
09/03/2004 19:00:00	25.00562827
09/03/2004 20:00:00	25.09299181
09/03/2004 21:00:00	25.17700607
09/03/2004 22:00:00	25.25677581
09/03/2004 23:00:00	25.33140581
10/03/2004 00:00:00	25.40000086
10/03/2004 01:00:00	25.4618677
10/03/2004 02:00:00	25.51712086
10/03/2004 03:00:00	25.56607683
10/03/2004 04:00:00	25.6090521
10/03/2004 05:00:00	25.64636316
10/03/2004 06:00:00	25.6783265
10/03/2004 07:00:00	25.70525859
10/03/2004 08:00:00	25.72747592
10/03/2004 09:00:00	25.74529499
10/03/2004 10:00:00	25.75903228
10/03/2004 11:00:00	25.76900428
10/03/2004 12:00:00	25.77552747
10/03/2004 13:00:00	25.77891833
10/03/2004 14:00:00	25.77949337
10/03/2004 15:00:00	25.77756905
10/03/2004 16:00:00	25.77346187
10/03/2004 17:00:00	25.76748832
10/03/2004 18:00:00	25.75996489
10/03/2004 19:00:00	25.75120805
10/03/2004 20:00:00	25.74153429
10/03/2004 21:00:00	25.73126011
10/03/2004 22:00:00	25.72070199
10/03/2004 23:00:00	25.71017641
11/03/2004 00:00:00	25.69999987
11/03/2004 01:00:00	25.690396
11/03/2004 02:00:00	25.68121713
11/03/2004 03:00:00	25.67222274
11/03/2004 04:00:00	25.66317231
11/03/2004 05:00:00	25.65382532
11/03/2004 06:00:00	25.64394125
11/03/2004 07:00:00	25.6332796
11/03/2004 08:00:00	25.62159984
11/03/2004 09:00:00	25.60866145
11/03/2004 10:00:00	25.59422392
11/03/2004 11:00:00	25.57804673
11/03/2004 12:00:00	25.55988937
11/03/2004 13:00:00	25.53951132
11/03/2004 14:00:00	25.51667205
11/03/2004 15:00:00	25.49113106
11/03/2004 16:00:00	25.46264782
11/03/2004 17:00:00	25.43098183
11/03/2004 18:00:00	25.39589256
11/03/2004 19:00:00	25.35713949
11/03/2004 20:00:00	25.31448211
11/03/2004 21:00:00	25.2676799
11/03/2004 22:00:00	25.21649235
11/03/2004 23:00:00	25.16067893
12/03/2004 00:00:00	25.09999914
12/03/2004 01:00:00	25.03431673
12/03/2004 02:00:00	24.9639126
12/03/2004 03:00:00	24.88917191
12/03/2004 04:00:00	24.81047983
12/03/2004 05:00:00	24.72822152
12/03/2004 06:00:00	24.64278214
12/03/2004 07:00:00	24.55454687
12/03/2004 08:00:00	24.46390085
12/03/2004 09:00:00	24.37122927
12/03/2004 10:00:00	24.27691728
12/03/2004 11:00:00	24.18135005
12/03/2004 12:00:00	24.08491274
12/03/2004 13:00:00	23.98799052
12/03/2004 14:00:00	23.89096856
12/03/2004 15:00:00	23.794232
12/03/2004 16:00:00	23.69816603
12/03/2004 17:00:00	23.60315581
12/03/2004 18:00:00	23.5095865
12/03/2004 19:00:00	23.41784326
12/03/2004 20:00:00	23.32831126
12/03/2004 21:00:00	23.24137567
12/03/2004 22:00:00	23.15742165
12/03/2004 23:00:00	23.07683436
13/03/2004 00:00:00	22.99999897
13/03/2004 01:00:00	22.92720059
13/03/2004 02:00:00	22.8583242
13/03/2004 03:00:00	22.79315473
13/03/2004 04:00:00	22.73147709
13/03/2004 05:00:00	22.67307621
13/03/2004 06:00:00	22.61773703
13/03/2004 07:00:00	22.56524448
13/03/2004 08:00:00	22.51538347
13/03/2004 09:00:00	22.46793895
13/03/2004 10:00:00	22.42269582
13/03/2004 11:00:00	22.37943904
13/03/2004 12:00:00	22.33795351
13/03/2004 13:00:00	22.29802418
13/03/2004 14:00:00	22.25943597
13/03/2004 15:00:00	22.2219738
13/03/2004 16:00:00	22.1854226
13/03/2004 17:00:00	22.14956731
13/03/2004 18:00:00	22.11419285
13/03/2004 19:00:00	22.07908414
13/03/2004 20:00:00	22.04402613
13/03/2004 21:00:00	22.00880372
13/03/2004 22:00:00	21.97320186
13/03/2004 23:00:00	21.93700547
14/03/2004 00:00:00	21.89999947
14/03/2004 01:00:00	21.8620115
14/03/2004 02:00:00	21.82303996
14/03/2004 03:00:00	21.78312593
14/03/2004 04:00:00	21.74231052
14/03/2004 05:00:00	21.70063483
14/03/2004 06:00:00	21.65813994
14/03/2004 07:00:00	21.61486696
14/03/2004 08:00:00	21.57085697
14/03/2004 09:00:00	21.52615108
14/03/2004 10:00:00	21.48079038
14/03/2004 11:00:00	21.43481597
14/03/2004 12:00:00	21.38826894
14/03/2004 13:00:00	21.34119039
14/03/2004 14:00:00	21.29362142
14/03/2004 15:00:00	21.24560311
14/03/2004 16:00:00	21.19717657
14/03/2004 17:00:00	21.14838289
14/03/2004 18:00:00	21.09926317
14/03/2004 19:00:00	21.0498585
14/03/2004 20:00:00	21.00020998
14/03/2004 21:00:00	20.9503587
14/03/2004 22:00:00	20.90034576
14/03/2004 23:00:00	20.85021226
15/03/2004 00:00:00	20.79999929
15/03/2004 01:00:00	20.74980018
15/03/2004 02:00:00	20.69991721
15/03/2004 03:00:00	20.6507049
15/03/2004 04:00:00	20.60251774
15/03/2004 05:00:00	20.55571024
15/03/2004 06:00:00	20.51063692
15/03/2004 07:00:00	20.46765228
15/03/2004 08:00:00	20.42711084
15/03/2004 09:00:00	20.38936709
15/03/2004 10:00:00	20.35477555
15/03/2004 11:00:00	20.32369073
15/03/2004 12:00:00	20.29646714
15/03/2004 13:00:00	20.27345928
15/03/2004 14:00:00	20.25502166
15/03/2004 15:00:00	20.2415088
15/03/2004 16:00:00	20.23327519
15/03/2004 17:00:00	20.23067535
15/03/2004 18:00:00	20.23406379
15/03/2004 19:00:00	20.24379502
15/03/2004 20:00:00	20.26022354
15/03/2004 21:00:00	20.28370386
15/03/2004 22:00:00	20.3145905
15/03/2004 23:00:00	20.35323795
16/03/2004 00:00:00	20.40000073
16/03/2004 01:00:00	20.45503958
16/03/2004 02:00:00	20.51774016
16/03/2004 03:00:00	20.58729438
16/03/2004 04:00:00	20.66289415
16/03/2004 05:00:00	20.7437314
16/03/2004 06:00:00	20.82899802
16/03/2004 07:00:00	20.91788593
16/03/2004 08:00:00	21.00958705
16/03/2004 09:00:00	21.10329328
16/03/2004 10:00:00	21.19819653
16/03/2004 11:00:00	21.29348873
16/03/2004 12:00:00	21.38836177
16/03/2004 13:00:00	21.48200757
16/03/2004 14:00:00	21.57361804
16/03/2004 15:00:00	21.6623851
16/03/2004 16:00:00	21.74750065
16/03/2004 17:00:00	21.82815661
16/03/2004 18:00:00	21.90354489
16/03/2004 19:00:00	21.9728574
16/03/2004 20:00:00	22.03528605
16/03/2004 21:00:00	22.09002276
16/03/2004 22:00:00	22.13625943
16/03/2004 23:00:00	22.17318798
17/03/2004 00:00:00	22.20000031
17/03/2004 01:00:00	22.21611206
17/03/2004 02:00:00	22.22183362
17/03/2004 03:00:00	22.21769909
17/03/2004 04:00:00	22.20424256
17/03/2004 05:00:00	22.18199814
17/03/2004 06:00:00	22.1514999
17/03/2004 07:00:00	22.11328196
17/03/2004 08:00:00	22.06787839
17/03/2004 09:00:00	22.01582331
17/03/2004 10:00:00	21.9576508
17/03/2004 11:00:00	21.89389495
17/03/2004 12:00:00	21.82508987
17/03/2004 13:00:00	21.75176964
17/03/2004 14:00:00	21.67446836
17/03/2004 15:00:00	21.59372013
17/03/2004 16:00:00	21.51005904
17/03/2004 17:00:00	21.42401918
17/03/2004 18:00:00	21.33613465
17/03/2004 19:00:00	21.24693955
17/03/2004 20:00:00	21.15696797
17/03/2004 21:00:00	21.066754
17/03/2004 22:00:00	20.97683174
17/03/2004 23:00:00	20.88773528
18/03/2004 00:00:00	20.79999872
18/03/2004 01:00:00	20.71409893
18/03/2004 02:00:00	20.63028394
18/03/2004 03:00:00	20.54874455
18/03/2004 04:00:00	20.46967156
18/03/2004 05:00:00	20.39325579
18/03/2004 06:00:00	20.31968805
18/03/2004 07:00:00	20.24915913
18/03/2004 08:00:00	20.18185984
18/03/2004 09:00:00	20.117981
18/03/2004 10:00:00	20.05771341
18/03/2004 11:00:00	20.00124788
18/03/2004 12:00:00	19.94877521
18/03/2004 13:00:00	19.90048621
18/03/2004 14:00:00	19.85657168
18/03/2004 15:00:00	19.81722244
18/03/2004 16:00:00	19.78262929
18/03/2004 17:00:00	19.75298304
18/03/2004 18:00:00	19.7284745
18/03/2004 19:00:00	19.70929446
18/03/2004 20:00:00	19.69563374
18/03/2004 21:00:00	19.68768315
18/03/2004 22:00:00	19.68563349
18/03/2004 23:00:00	19.68967558
19/03/2004 00:00:00	19.7000002
19/03/2004 01:00:00	19.71677441
19/03/2004 02:00:00	19.74007013
19/03/2004 03:00:00	19.76993553
19/03/2004 04:00:00	19.80641877
19/03/2004 05:00:00	19.84956802
19/03/2004 06:00:00	19.89943143
19/03/2004 07:00:00	19.95605718
19/03/2004 08:00:00	20.01949343
19/03/2004 09:00:00	20.08978834
19/03/2004 10:00:00	20.16699008
19/03/2004 11:00:00	20.25114681
19/03/2004 12:00:00	20.34230668
19/03/2004 13:00:00	20.44051788
19/03/2004 14:00:00	20.54582855
19/03/2004 15:00:00	20.65828687
19/03/2004 16:00:00	20.777941
19/03/2004 17:00:00	20.9048391
19/03/2004 18:00:00	21.03902934
19/03/2004 19:00:00	21.18055987
19/03/2004 20:00:00	21.32947887
19/03/2004 21:00:00	21.48583449
19/03/2004 22:00:00	21.64967491
19/03/2004 23:00:00	21.82104828
20/03/2004 00:00:00	22.00000277
20/03/2004 01:00:00	22.18640609
20/03/2004 02:00:00	22.37940417
20/03/2004 03:00:00	22.57796251
20/03/2004 04:00:00	22.78104661
20/03/2004 05:00:00	22.98762195
20/03/2004 06:00:00	23.19665404
20/03/2004 07:00:00	23.40710838
20/03/2004 08:00:00	23.61795045
20/03/2004 09:00:00	23.82814576
20/03/2004 10:00:00	24.0366598
20/03/2004 11:00:00	24.24245807
20/03/2004 12:00:00	24.44450607
20/03/2004 13:00:00	24.64176928
20/03/2004 14:00:00	24.83321321
20/03/2004 15:00:00	25.01780335
20/03/2004 16:00:00	25.1945052
20/03/2004 17:00:00	25.36228425
20/03/2004 18:00:00	25.52010601
20/03/2004 19:00:00	25.66693596
20/03/2004 20:00:00	25.80173961
20/03/2004 21:00:00	25.92348244
20/03/2004 22:00:00	26.03112996
20/03/2004 23:00:00	26.12364766
21/03/2004 00:00:00	26.20000104
21/03/2004 01:00:00	26.25972033
21/03/2004 02:00:00	26.30459459
21/03/2004 03:00:00	26.33697755
21/03/2004 04:00:00	26.35922295
21/03/2004 05:00:00	26.37368455
21/03/2004 06:00:00	26.38271607
21/03/2004 07:00:00	26.38867127
21/03/2004 08:00:00	26.39390387
21/03/2004 09:00:00	26.40076762
21/03/2004 10:00:00	26.41161626
21/03/2004 11:00:00	26.42880352
21/03/2004 12:00:00	26.45468316
21/03/2004 13:00:00	26.49160891
21/03/2004 14:00:00	26.54193451
21/03/2004 15:00:00	26.6080137
21/03/2004 16:00:00	26.69220022
21/03/2004 17:00:00	26.79684782
21/03/2004 18:00:00	26.92431023
21/03/2004 19:00:00	27.07694118
21/03/2004 20:00:00	27.25709444
21/03/2004 21:00:00	27.46712372
21/03/2004 22:00:00	27.70938278
21/03/2004 23:00:00	27.98622535
22/03/2004 00:00:00	28.30000518
22/03/2004 01:00:00	28.6523069
22/03/2004 02:00:00	29.04163887
22/03/2004 03:00:00	29.46574044
22/03/2004 04:00:00	29.92235093
22/03/2004 05:00:00	30.40920968
22/03/2004 06:00:00	30.92405603
22/03/2004 07:00:00	31.4646293
22/03/2004 08:00:00	32.02866884
22/03/2004 09:00:00	32.61391397
22/03/2004 10:00:00	33.21810404
22/03/2004 11:00:00	33.83897837
22/03/2004 12:00:00	34.47427629
22/03/2004 13:00:00	35.12173716
22/03/2004 14:00:00	35.77910029
22/03/2004 15:00:00	36.44410502
22/03/2004 16:00:00	37.11449069
22/03/2004 17:00:00	37.78799662
22/03/2004 18:00:00	38.46236217
22/03/2004 19:00:00	39.13532665
22/03/2004 20:00:00	39.8046294
22/03/2004 21:00:00	40.46800977
22/03/2004 22:00:00	41.12320707
22/03/2004 23:00:00	41.76796065
23/03/2004 00:00:00	42.40000984
23/03/2004 01:00:00	43.01746435
23/03/2004 02:00:00	43.61991533
23/03/2004 03:00:00	44.20732428
23/03/2004 04:00:00	44.77965268
23/03/2004 05:00:00	45.33686203
23/03/2004 06:00:00	45.87891381
23/03/2004 07:00:00	46.40576953
23/03/2004 08:00:00	46.91739067
23/03/2004 09:00:00	47.41373873
23/03/2004 10:00:00	47.8947752
23/03/2004 11:00:00	48.36046156
23/03/2004 12:00:00	48.81075932
23/03/2004 13:00:00	49.24562996
23/03/2004 14:00:00	49.66503497
23/03/2004 15:00:00	50.06893586
23/03/2004 16:00:00	50.4572941
23/03/2004 17:00:00	50.8300712
23/03/2004 18:00:00	51.18722864
23/03/2004 19:00:00	51.52872792
23/03/2004 20:00:00	51.85453052
23/03/2004 21:00:00	52.16459794
23/03/2004 22:00:00	52.45889168
23/03/2004 23:00:00	52.73737322
24/03/2004 00:00:00	53.00000406
24/03/2004 01:00:00	53.24678563
24/03/2004 02:00:00	53.47787915
24/03/2004 03:00:00	53.69348577
24/03/2004 04:00:00	53.89380666
24/03/2004 05:00:00	54.07904296
24/03/2004 06:00:00	54.24939583
[truncated: 6,785 more rows]
