# Supplementary material for: Flood Prediction in Ungauged Basins by Physical-Based TOPKAPI Model
Source: Hindawi journal article supplement (doi:10.1155/2019/4795853), 2019-09-05
Supplement: f1 [file 4795853.f1.zip › 4795853.f1/xxdis_2005.csv]

time	50100500
01/01/2005 00:00:00	25.7
01/01/2005 01:00:00	25.2192575
01/01/2005 02:00:00	24.80125312
01/01/2005 03:00:00	24.44402147
01/01/2005 04:00:00	24.14559721
01/01/2005 05:00:00	23.90401496
01/01/2005 06:00:00	23.71730936
01/01/2005 07:00:00	23.58351505
01/01/2005 08:00:00	23.50066666
01/01/2005 09:00:00	23.46679882
01/01/2005 10:00:00	23.47994618
01/01/2005 11:00:00	23.53814336
01/01/2005 12:00:00	23.63942501
01/01/2005 13:00:00	23.78182575
01/01/2005 14:00:00	23.96338023
01/01/2005 15:00:00	24.18212307
01/01/2005 16:00:00	24.43608892
01/01/2005 17:00:00	24.72331241
01/01/2005 18:00:00	25.04182817
01/01/2005 19:00:00	25.38967084
01/01/2005 20:00:00	25.76487506
01/01/2005 21:00:00	26.16547546
01/01/2005 22:00:00	26.58950667
01/01/2005 23:00:00	27.03500334
02/01/2005 00:00:00	27.50000009
02/01/2005 01:00:00	27.98253157
02/01/2005 02:00:00	28.4806324
02/01/2005 03:00:00	28.99233722
02/01/2005 04:00:00	29.51568068
02/01/2005 05:00:00	30.04869739
02/01/2005 06:00:00	30.58942201
02/01/2005 07:00:00	31.13588916
02/01/2005 08:00:00	31.68613348
02/01/2005 09:00:00	32.2381896
02/01/2005 10:00:00	32.79009217
02/01/2005 11:00:00	33.33987581
02/01/2005 12:00:00	33.88557516
02/01/2005 13:00:00	34.42522486
02/01/2005 14:00:00	34.95685954
02/01/2005 15:00:00	35.47851384
02/01/2005 16:00:00	35.98822239
02/01/2005 17:00:00	36.48401983
02/01/2005 18:00:00	36.96394079
02/01/2005 19:00:00	37.42601991
02/01/2005 20:00:00	37.86829182
02/01/2005 21:00:00	38.28879117
02/01/2005 22:00:00	38.68555257
02/01/2005 23:00:00	39.05661068
03/01/2005 00:00:00	39.40000013
03/01/2005 01:00:00	39.71425968
03/01/2005 02:00:00	39.99994467
03/01/2005 03:00:00	40.25811455
03/01/2005 04:00:00	40.48982879
03/01/2005 05:00:00	40.69614685
03/01/2005 06:00:00	40.87812819
03/01/2005 07:00:00	41.03683227
03/01/2005 08:00:00	41.17331856
03/01/2005 09:00:00	41.28864652
03/01/2005 10:00:00	41.3838756
03/01/2005 11:00:00	41.46006528
03/01/2005 12:00:00	41.51827501
03/01/2005 13:00:00	41.55956425
03/01/2005 14:00:00	41.58499247
03/01/2005 15:00:00	41.59561912
03/01/2005 16:00:00	41.59250368
03/01/2005 17:00:00	41.5767056
03/01/2005 18:00:00	41.54928434
03/01/2005 19:00:00	41.51129937
03/01/2005 20:00:00	41.46381014
03/01/2005 21:00:00	41.40787613
03/01/2005 22:00:00	41.34455678
03/01/2005 23:00:00	41.27491157
04/01/2005 00:00:00	41.19999996
04/01/2005 01:00:00	41.12058649
04/01/2005 02:00:00	41.03625609
04/01/2005 03:00:00	40.94629879
04/01/2005 04:00:00	40.85000459
04/01/2005 05:00:00	40.74666352
04/01/2005 06:00:00	40.63556559
04/01/2005 07:00:00	40.51600082
04/01/2005 08:00:00	40.38725922
04/01/2005 09:00:00	40.24863082
04/01/2005 10:00:00	40.09940563
04/01/2005 11:00:00	39.93887367
04/01/2005 12:00:00	39.76632495
04/01/2005 13:00:00	39.58104949
04/01/2005 14:00:00	39.38233731
04/01/2005 15:00:00	39.16947843
04/01/2005 16:00:00	38.94176287
04/01/2005 17:00:00	38.69848063
04/01/2005 18:00:00	38.43892175
04/01/2005 19:00:00	38.16237623
04/01/2005 20:00:00	37.86813409
04/01/2005 21:00:00	37.55548535
04/01/2005 22:00:00	37.22372003
04/01/2005 23:00:00	36.87212814
05/01/2005 00:00:00	36.49999971
05/01/2005 01:00:00	36.10706152
05/01/2005 02:00:00	35.69478748
05/01/2005 03:00:00	35.26508826
05/01/2005 04:00:00	34.81987455
05/01/2005 05:00:00	34.36105702
05/01/2005 06:00:00	33.89054635
05/01/2005 07:00:00	33.41025322
05/01/2005 08:00:00	32.9220883
05/01/2005 09:00:00	32.42796227
05/01/2005 10:00:00	31.92978581
05/01/2005 11:00:00	31.4294696
05/01/2005 12:00:00	30.92892432
05/01/2005 13:00:00	30.43006063
05/01/2005 14:00:00	29.93478923
05/01/2005 15:00:00	29.44502078
05/01/2005 16:00:00	28.96266597
05/01/2005 17:00:00	28.48963547
05/01/2005 18:00:00	28.02783997
05/01/2005 19:00:00	27.57919013
05/01/2005 20:00:00	27.14559663
05/01/2005 21:00:00	26.72897016
05/01/2005 22:00:00	26.3312214
05/01/2005 23:00:00	25.95426101
06/01/2005 00:00:00	25.59999967
06/01/2005 01:00:00	25.26998817
06/01/2005 02:00:00	24.96433771
06/01/2005 03:00:00	24.68279958
06/01/2005 04:00:00	24.42512508
06/01/2005 05:00:00	24.19106551
06/01/2005 06:00:00	23.98037217
06/01/2005 07:00:00	23.79279637
06/01/2005 08:00:00	23.6280894
06/01/2005 09:00:00	23.48600257
06/01/2005 10:00:00	23.36628717
06/01/2005 11:00:00	23.2686945
06/01/2005 12:00:00	23.19297587
06/01/2005 13:00:00	23.13888257
06/01/2005 14:00:00	23.1061659
06/01/2005 15:00:00	23.09457717
06/01/2005 16:00:00	23.10386768
06/01/2005 17:00:00	23.13378872
06/01/2005 18:00:00	23.1840916
06/01/2005 19:00:00	23.25452761
06/01/2005 20:00:00	23.34484805
06/01/2005 21:00:00	23.45480424
06/01/2005 22:00:00	23.58414746
06/01/2005 23:00:00	23.73262901
07/01/2005 00:00:00	23.9000002
07/01/2005 01:00:00	24.08579986
07/01/2005 02:00:00	24.28871694
07/01/2005 03:00:00	24.50722792
07/01/2005 04:00:00	24.73980928
07/01/2005 05:00:00	24.9849375
07/01/2005 06:00:00	25.24108908
07/01/2005 07:00:00	25.50674048
07/01/2005 08:00:00	25.7803682
07/01/2005 09:00:00	26.06044872
07/01/2005 10:00:00	26.34545851
07/01/2005 11:00:00	26.63387407
07/01/2005 12:00:00	26.92417187
07/01/2005 13:00:00	27.2148284
07/01/2005 14:00:00	27.50432014
07/01/2005 15:00:00	27.79112357
07/01/2005 16:00:00	28.07371518
07/01/2005 17:00:00	28.35057144
07/01/2005 18:00:00	28.62016885
07/01/2005 19:00:00	28.88098387
07/01/2005 20:00:00	29.13149301
07/01/2005 21:00:00	29.37017273
07/01/2005 22:00:00	29.59549952
07/01/2005 23:00:00	29.80594987
08/01/2005 00:00:00	30.00000025
08/01/2005 01:00:00	30.17660631
08/01/2005 02:00:00	30.33664035
08/01/2005 03:00:00	30.48145381
08/01/2005 04:00:00	30.61239814
08/01/2005 05:00:00	30.73082479
08/01/2005 06:00:00	30.83808522
08/01/2005 07:00:00	30.93553086
08/01/2005 08:00:00	31.02451317
08/01/2005 09:00:00	31.10638361
08/01/2005 10:00:00	31.18249361
08/01/2005 11:00:00	31.25419463
08/01/2005 12:00:00	31.32283812
08/01/2005 13:00:00	31.38977553
08/01/2005 14:00:00	31.45635831
08/01/2005 15:00:00	31.5239379
08/01/2005 16:00:00	31.59386576
08/01/2005 17:00:00	31.66749334
08/01/2005 18:00:00	31.74617209
08/01/2005 19:00:00	31.83125345
08/01/2005 20:00:00	31.92408887
08/01/2005 21:00:00	32.02602981
08/01/2005 22:00:00	32.13842772
08/01/2005 23:00:00	32.26263404
09/01/2005 00:00:00	32.40000022
09/01/2005 01:00:00	32.55124414
09/01/2005 02:00:00	32.71454938
09/01/2005 03:00:00	32.88746595
09/01/2005 04:00:00	33.06754386
09/01/2005 05:00:00	33.25233312
09/01/2005 06:00:00	33.43938374
09/01/2005 07:00:00	33.62624573
09/01/2005 08:00:00	33.8104691
09/01/2005 09:00:00	33.98960386
09/01/2005 10:00:00	34.16120003
09/01/2005 11:00:00	34.32280761
09/01/2005 12:00:00	34.47197662
09/01/2005 13:00:00	34.60625706
09/01/2005 14:00:00	34.72319895
09/01/2005 15:00:00	34.82035229
09/01/2005 16:00:00	34.8952671
09/01/2005 17:00:00	34.94549338
09/01/2005 18:00:00	34.96858116
09/01/2005 19:00:00	34.96208043
09/01/2005 20:00:00	34.92354121
09/01/2005 21:00:00	34.85051351
09/01/2005 22:00:00	34.74054734
09/01/2005 23:00:00	34.59119271
10/01/2005 00:00:00	34.39999963
10/01/2005 01:00:00	34.16555329
10/01/2005 02:00:00	33.89057952
10/01/2005 03:00:00	33.57883935
10/01/2005 04:00:00	33.23409377
10/01/2005 05:00:00	32.8601038
10/01/2005 06:00:00	32.46063043
10/01/2005 07:00:00	32.03943469
10/01/2005 08:00:00	31.60027758
10/01/2005 09:00:00	31.1469201
10/01/2005 10:00:00	30.68312327
10/01/2005 11:00:00	30.21264808
10/01/2005 12:00:00	29.73925556
10/01/2005 13:00:00	29.26670671
10/01/2005 14:00:00	28.79876253
10/01/2005 15:00:00	28.33918403
10/01/2005 16:00:00	27.89173223
10/01/2005 17:00:00	27.46016812
10/01/2005 18:00:00	27.04825272
10/01/2005 19:00:00	26.65974704
10/01/2005 20:00:00	26.29841208
10/01/2005 21:00:00	25.96800885
10/01/2005 22:00:00	25.67229836
10/01/2005 23:00:00	25.41504162
11/01/2005 00:00:00	25.19999963
11/01/2005 01:00:00	25.02982069
11/01/2005 02:00:00	24.90270228
11/01/2005 03:00:00	24.81572918
11/01/2005 04:00:00	24.76598615
11/01/2005 05:00:00	24.75055799
11/01/2005 06:00:00	24.76652946
11/01/2005 07:00:00	24.81098535
11/01/2005 08:00:00	24.88101043
11/01/2005 09:00:00	24.97368948
11/01/2005 10:00:00	25.08610727
11/01/2005 11:00:00	25.21534859
11/01/2005 12:00:00	25.35849821
11/01/2005 13:00:00	25.51264091
11/01/2005 14:00:00	25.67486147
11/01/2005 15:00:00	25.84224466
11/01/2005 16:00:00	26.01187526
11/01/2005 17:00:00	26.18083805
11/01/2005 18:00:00	26.3462178
11/01/2005 19:00:00	26.5050993
11/01/2005 20:00:00	26.65456732
11/01/2005 21:00:00	26.79170663
11/01/2005 22:00:00	26.91360203
11/01/2005 23:00:00	27.01733827
12/01/2005 00:00:00	27.10000015
12/01/2005 01:00:00	27.15938265
12/01/2005 02:00:00	27.19612164
12/01/2005 03:00:00	27.21156316
12/01/2005 04:00:00	27.20705329
12/01/2005 05:00:00	27.18393809
12/01/2005 06:00:00	27.14356362
12/01/2005 07:00:00	27.08727594
12/01/2005 08:00:00	27.01642112
12/01/2005 09:00:00	26.93234522
12/01/2005 10:00:00	26.8363943
12/01/2005 11:00:00	26.72991443
12/01/2005 12:00:00	26.61425166
12/01/2005 13:00:00	26.49075207
12/01/2005 14:00:00	26.36076171
12/01/2005 15:00:00	26.22562664
12/01/2005 16:00:00	26.08669293
12/01/2005 17:00:00	25.94530665
12/01/2005 18:00:00	25.80281385
12/01/2005 19:00:00	25.66056059
12/01/2005 20:00:00	25.51989295
12/01/2005 21:00:00	25.38215698
12/01/2005 22:00:00	25.24869874
12/01/2005 23:00:00	25.12086431
13/01/2005 00:00:00	24.99999973
13/01/2005 01:00:00	24.88717692
13/01/2005 02:00:00	24.78237114
13/01/2005 03:00:00	24.6852835
13/01/2005 04:00:00	24.59561511
13/01/2005 05:00:00	24.51306708
13/01/2005 06:00:00	24.43734053
13/01/2005 07:00:00	24.36813655
13/01/2005 08:00:00	24.30515627
13/01/2005 09:00:00	24.24810079
13/01/2005 10:00:00	24.19667123
13/01/2005 11:00:00	24.15056869
13/01/2005 12:00:00	24.10949428
13/01/2005 13:00:00	24.07314912
13/01/2005 14:00:00	24.04123431
13/01/2005 15:00:00	24.01345097
13/01/2005 16:00:00	23.9895002
13/01/2005 17:00:00	23.96908311
13/01/2005 18:00:00	23.95190083
13/01/2005 19:00:00	23.93765444
13/01/2005 20:00:00	23.92604508
13/01/2005 21:00:00	23.91677384
13/01/2005 22:00:00	23.90954184
13/01/2005 23:00:00	23.90405019
14/01/2005 00:00:00	23.89999999
14/01/2005 01:00:00	23.89708093
14/01/2005 02:00:00	23.89493691
14/01/2005 03:00:00	23.89320043
14/01/2005 04:00:00	23.89150395
14/01/2005 05:00:00	23.88947998
14/01/2005 06:00:00	23.88676098
14/01/2005 07:00:00	23.88297945
14/01/2005 08:00:00	23.87776785
14/01/2005 09:00:00	23.87075868
14/01/2005 10:00:00	23.86158442
14/01/2005 11:00:00	23.84987754
14/01/2005 12:00:00	23.83527054
14/01/2005 13:00:00	23.81739588
14/01/2005 14:00:00	23.79588606
14/01/2005 15:00:00	23.77037356
14/01/2005 16:00:00	23.74049085
14/01/2005 17:00:00	23.70587043
14/01/2005 18:00:00	23.66614476
14/01/2005 19:00:00	23.62094634
14/01/2005 20:00:00	23.56990765
14/01/2005 21:00:00	23.51266117
14/01/2005 22:00:00	23.44883937
14/01/2005 23:00:00	23.37807475
15/01/2005 00:00:00	23.29999978
15/01/2005 01:00:00	23.21440772
15/01/2005 02:00:00	23.12173488
15/01/2005 03:00:00	23.02257835
15/01/2005 04:00:00	22.91753523
15/01/2005 05:00:00	22.80720258
15/01/2005 06:00:00	22.69217751
15/01/2005 07:00:00	22.5730571
15/01/2005 08:00:00	22.45043844
15/01/2005 09:00:00	22.3249186
15/01/2005 10:00:00	22.19709468
15/01/2005 11:00:00	22.06756377
15/01/2005 12:00:00	21.93692295
15/01/2005 13:00:00	21.80576931
15/01/2005 14:00:00	21.67469993
15/01/2005 15:00:00	21.5443119
15/01/2005 16:00:00	21.41520231
15/01/2005 17:00:00	21.28796824
15/01/2005 18:00:00	21.16320679
15/01/2005 19:00:00	21.04151503
15/01/2005 20:00:00	20.92349006
15/01/2005 21:00:00	20.80972895
15/01/2005 22:00:00	20.7008288
15/01/2005 23:00:00	20.5973867
16/01/2005 00:00:00	20.49999973
16/01/2005 01:00:00	20.40911077
16/01/2005 02:00:00	20.32454591
16/01/2005 03:00:00	20.24597702
16/01/2005 04:00:00	20.17307598
16/01/2005 05:00:00	20.10551468
16/01/2005 06:00:00	20.04296499
16/01/2005 07:00:00	19.9850988
16/01/2005 08:00:00	19.93158798
16/01/2005 09:00:00	19.88210442
16/01/2005 10:00:00	19.83631999
16/01/2005 11:00:00	19.79390657
16/01/2005 12:00:00	19.75453605
16/01/2005 13:00:00	19.71788031
16/01/2005 14:00:00	19.68361121
16/01/2005 15:00:00	19.65140066
16/01/2005 16:00:00	19.62092052
16/01/2005 17:00:00	19.59184267
16/01/2005 18:00:00	19.563839
16/01/2005 19:00:00	19.53658138
16/01/2005 20:00:00	19.50974169
16/01/2005 21:00:00	19.48299183
16/01/2005 22:00:00	19.45600365
16/01/2005 23:00:00	19.42844905
17/01/2005 00:00:00	19.39999991
17/01/2005 01:00:00	19.37045139
17/01/2005 02:00:00	19.34009177
17/01/2005 03:00:00	19.30933264
17/01/2005 04:00:00	19.27858557
17/01/2005 05:00:00	19.24826213
17/01/2005 06:00:00	19.2187739
17/01/2005 07:00:00	19.19053245
17/01/2005 08:00:00	19.16394935
17/01/2005 09:00:00	19.13943619
17/01/2005 10:00:00	19.11740452
17/01/2005 11:00:00	19.09826593
17/01/2005 12:00:00	19.08243198
17/01/2005 13:00:00	19.07031426
17/01/2005 14:00:00	19.06232434
17/01/2005 15:00:00	19.05887379
17/01/2005 16:00:00	19.06037418
17/01/2005 17:00:00	19.06723709
17/01/2005 18:00:00	19.0798741
17/01/2005 19:00:00	19.09869677
17/01/2005 20:00:00	19.12411668
17/01/2005 21:00:00	19.1565454
17/01/2005 22:00:00	19.19639451
17/01/2005 23:00:00	19.24407559
18/01/2005 00:00:00	19.3000002
18/01/2005 01:00:00	19.36435672
18/01/2005 02:00:00	19.43644081
18/01/2005 03:00:00	19.51532489
18/01/2005 04:00:00	19.60008143
18/01/2005 05:00:00	19.68978288
18/01/2005 06:00:00	19.78350167
18/01/2005 07:00:00	19.88031027
18/01/2005 08:00:00	19.97928113
18/01/2005 09:00:00	20.07948668
18/01/2005 10:00:00	20.17999939
18/01/2005 11:00:00	20.27989169
18/01/2005 12:00:00	20.37823605
18/01/2005 13:00:00	20.47410491
18/01/2005 14:00:00	20.56657072
18/01/2005 15:00:00	20.65470593
18/01/2005 16:00:00	20.73758299
18/01/2005 17:00:00	20.81427434
18/01/2005 18:00:00	20.88385245
18/01/2005 19:00:00	20.94538976
18/01/2005 20:00:00	20.99795871
18/01/2005 21:00:00	21.04063176
18/01/2005 22:00:00	21.07248136
18/01/2005 23:00:00	21.09257996
19/01/2005 00:00:00	21.1
19/01/2005 01:00:00	21.09411322
19/01/2005 02:00:00	21.0754884
19/01/2005 03:00:00	21.04499364
19/01/2005 04:00:00	21.00349699
19/01/2005 05:00:00	20.95186654
19/01/2005 06:00:00	20.89097034
19/01/2005 07:00:00	20.82167648
19/01/2005 08:00:00	20.74485303
19/01/2005 09:00:00	20.66136806
19/01/2005 10:00:00	20.57208963
19/01/2005 11:00:00	20.47788583
19/01/2005 12:00:00	20.37962472
19/01/2005 13:00:00	20.27817438
19/01/2005 14:00:00	20.17440287
19/01/2005 15:00:00	20.06917828
19/01/2005 16:00:00	19.96336866
19/01/2005 17:00:00	19.8578421
19/01/2005 18:00:00	19.75346667
19/01/2005 19:00:00	19.65111043
19/01/2005 20:00:00	19.55164146
19/01/2005 21:00:00	19.45592784
19/01/2005 22:00:00	19.36483762
19/01/2005 23:00:00	19.27923889
20/01/2005 00:00:00	19.19999972
20/01/2005 01:00:00	19.12778107
20/01/2005 02:00:00	19.06241544
20/01/2005 03:00:00	19.00352824
20/01/2005 04:00:00	18.95074486
20/01/2005 05:00:00	18.90369072
20/01/2005 06:00:00	18.86199121
20/01/2005 07:00:00	18.82527173
20/01/2005 08:00:00	18.79315769
20/01/2005 09:00:00	18.76527449
20/01/2005 10:00:00	18.74124752
20/01/2005 11:00:00	18.7207022
20/01/2005 12:00:00	18.70326392
20/01/2005 13:00:00	18.68855808
20/01/2005 14:00:00	18.67621008
20/01/2005 15:00:00	18.66584534
20/01/2005 16:00:00	18.65708924
20/01/2005 17:00:00	18.64956719
20/01/2005 18:00:00	18.64290459
20/01/2005 19:00:00	18.63672684
20/01/2005 20:00:00	18.63065935
20/01/2005 21:00:00	18.62432751
20/01/2005 22:00:00	18.61735674
20/01/2005 23:00:00	18.60937242
21/01/2005 00:00:00	18.59999996
21/01/2005 01:00:00	18.58895268
21/01/2005 02:00:00	18.57629556
21/01/2005 03:00:00	18.56218148
21/01/2005 04:00:00	18.54676334
21/01/2005 05:00:00	18.53019403
21/01/2005 06:00:00	18.51262644
21/01/2005 07:00:00	18.49421346
21/01/2005 08:00:00	18.47510799
21/01/2005 09:00:00	18.45546291
21/01/2005 10:00:00	18.43543111
21/01/2005 11:00:00	18.41516549
21/01/2005 12:00:00	18.39481894
21/01/2005 13:00:00	18.37454434
21/01/2005 14:00:00	18.3544946
21/01/2005 15:00:00	18.3348226
21/01/2005 16:00:00	18.31568123
21/01/2005 17:00:00	18.29722338
21/01/2005 18:00:00	18.27960195
21/01/2005 19:00:00	18.26296982
21/01/2005 20:00:00	18.24747989
21/01/2005 21:00:00	18.23328505
21/01/2005 22:00:00	18.22053819
21/01/2005 23:00:00	18.2093922
22/01/2005 00:00:00	18.19999997
22/01/2005 01:00:00	18.19246388
22/01/2005 02:00:00	18.18668429
22/01/2005 03:00:00	18.18251102
22/01/2005 04:00:00	18.17979393
22/01/2005 05:00:00	18.17838284
22/01/2005 06:00:00	18.1781276
22/01/2005 07:00:00	18.17887805
22/01/2005 08:00:00	18.18048403
22/01/2005 09:00:00	18.18279537
22/01/2005 10:00:00	18.18566191
22/01/2005 11:00:00	18.1889335
22/01/2005 12:00:00	18.19245997
22/01/2005 13:00:00	18.19609117
22/01/2005 14:00:00	18.19967692
22/01/2005 15:00:00	18.20306708
22/01/2005 16:00:00	18.20611147
22/01/2005 17:00:00	18.20865995
22/01/2005 18:00:00	18.21056234
22/01/2005 19:00:00	18.21166849
22/01/2005 20:00:00	18.21182824
22/01/2005 21:00:00	18.21089142
22/01/2005 22:00:00	18.20870788
22/01/2005 23:00:00	18.20512745
23/01/2005 00:00:00	18.19999997
23/01/2005 01:00:00	18.19323154
23/01/2005 02:00:00	18.18495324
23/01/2005 03:00:00	18.1753524
23/01/2005 04:00:00	18.16461636
23/01/2005 05:00:00	18.15293246
23/01/2005 06:00:00	18.14048803
23/01/2005 07:00:00	18.1274704
23/01/2005 08:00:00	18.11406692
23/01/2005 09:00:00	18.10046491
23/01/2005 10:00:00	18.08685172
23/01/2005 11:00:00	18.07341467
23/01/2005 12:00:00	18.0603411
23/01/2005 13:00:00	18.04781836
23/01/2005 14:00:00	18.03603376
23/01/2005 15:00:00	18.02517466
23/01/2005 16:00:00	18.01542837
23/01/2005 17:00:00	18.00698225
23/01/2005 18:00:00	18.00002363
23/01/2005 19:00:00	17.99473983
23/01/2005 20:00:00	17.9913182
23/01/2005 21:00:00	17.98994607
23/01/2005 22:00:00	17.99081077
23/01/2005 23:00:00	17.99409965
24/01/2005 00:00:00	18.00000003
24/01/2005 01:00:00	18.00864774
24/01/2005 02:00:00	18.01997254
24/01/2005 03:00:00	18.03385269
24/01/2005 04:00:00	18.05016642
24/01/2005 05:00:00	18.06879199
24/01/2005 06:00:00	18.08960766
24/01/2005 07:00:00	18.11249166
24/01/2005 08:00:00	18.13732226
24/01/2005 09:00:00	18.1639777
24/01/2005 10:00:00	18.19233623
24/01/2005 11:00:00	18.2222761
24/01/2005 12:00:00	18.25367556
24/01/2005 13:00:00	18.28641286
24/01/2005 14:00:00	18.32036625
24/01/2005 15:00:00	18.35541398
24/01/2005 16:00:00	18.39143431
24/01/2005 17:00:00	18.42830547
24/01/2005 18:00:00	18.46590573
24/01/2005 19:00:00	18.50411333
24/01/2005 20:00:00	18.54280652
24/01/2005 21:00:00	18.58186354
24/01/2005 22:00:00	18.62116267
24/01/2005 23:00:00	18.66058213
25/01/2005 00:00:00	18.70000018
25/01/2005 01:00:00	18.73930021
25/01/2005 02:00:00	18.77838611
25/01/2005 03:00:00	18.81716694
25/01/2005 04:00:00	18.85555173
25/01/2005 05:00:00	18.89344952
25/01/2005 06:00:00	18.93076934
25/01/2005 07:00:00	18.96742025
25/01/2005 08:00:00	19.00331127
25/01/2005 09:00:00	19.03835146
25/01/2005 10:00:00	19.07244984
25/01/2005 11:00:00	19.10551545
25/01/2005 12:00:00	19.13745735
25/01/2005 13:00:00	19.16818455
25/01/2005 14:00:00	19.19760612
25/01/2005 15:00:00	19.22563108
25/01/2005 16:00:00	19.25216848
25/01/2005 17:00:00	19.27712735
25/01/2005 18:00:00	19.30041673
25/01/2005 19:00:00	19.32194567
25/01/2005 20:00:00	19.3416232
25/01/2005 21:00:00	19.35935836
25/01/2005 22:00:00	19.3750602
25/01/2005 23:00:00	19.38863775
26/01/2005 00:00:00	19.40000005
26/01/2005 01:00:00	19.40910883
26/01/2005 02:00:00	19.41613658
26/01/2005 03:00:00	19.42130847
26/01/2005 04:00:00	19.42484968
26/01/2005 05:00:00	19.42698538
26/01/2005 06:00:00	19.42794075
26/01/2005 07:00:00	19.42794096
26/01/2005 08:00:00	19.42721119
26/01/2005 09:00:00	19.42597662
26/01/2005 10:00:00	19.42446241
26/01/2005 11:00:00	19.42289374
26/01/2005 12:00:00	19.42149579
26/01/2005 13:00:00	19.42049374
26/01/2005 14:00:00	19.42011275
26/01/2005 15:00:00	19.420578
26/01/2005 16:00:00	19.42211468
26/01/2005 17:00:00	19.42494794
26/01/2005 18:00:00	19.42930297
26/01/2005 19:00:00	19.43540495
26/01/2005 20:00:00	19.44347904
26/01/2005 21:00:00	19.45375043
26/01/2005 22:00:00	19.46644429
26/01/2005 23:00:00	19.48178578
27/01/2005 00:00:00	19.5000001
27/01/2005 01:00:00	19.5213714
27/01/2005 02:00:00	19.54641985
27/01/2005 03:00:00	19.5757246
27/01/2005 04:00:00	19.60986478
27/01/2005 05:00:00	19.64941956
27/01/2005 06:00:00	19.69496808
27/01/2005 07:00:00	19.74708948
27/01/2005 08:00:00	19.80636293
27/01/2005 09:00:00	19.87336757
27/01/2005 10:00:00	19.94868255
27/01/2005 11:00:00	20.03288701
27/01/2005 12:00:00	20.12656011
27/01/2005 13:00:00	20.230281
27/01/2005 14:00:00	20.34462882
27/01/2005 15:00:00	20.47018273
27/01/2005 16:00:00	20.60752187
27/01/2005 17:00:00	20.7572254
27/01/2005 18:00:00	20.91987245
27/01/2005 19:00:00	21.09604219
27/01/2005 20:00:00	21.28631377
27/01/2005 21:00:00	21.49126632
27/01/2005 22:00:00	21.711479
27/01/2005 23:00:00	21.94753096
28/01/2005 00:00:00	22.20000135
28/01/2005 01:00:00	22.46911554
28/01/2005 02:00:00	22.75368378
28/01/2005 03:00:00	23.05216258
28/01/2005 04:00:00	23.36300842
28/01/2005 05:00:00	23.68467779
28/01/2005 06:00:00	24.01562719
28/01/2005 07:00:00	24.3543131
28/01/2005 08:00:00	24.69919202
28/01/2005 09:00:00	25.04872044
28/01/2005 10:00:00	25.40135486
28/01/2005 11:00:00	25.75555176
28/01/2005 12:00:00	26.10976763
28/01/2005 13:00:00	26.46245898
28/01/2005 14:00:00	26.81208228
28/01/2005 15:00:00	27.15709403
28/01/2005 16:00:00	27.49595072
28/01/2005 17:00:00	27.82710885
28/01/2005 18:00:00	28.14902491
28/01/2005 19:00:00	28.46015538
28/01/2005 20:00:00	28.75895676
28/01/2005 21:00:00	29.04388554
28/01/2005 22:00:00	29.31339821
28/01/2005 23:00:00	29.56595127
29/01/2005 00:00:00	29.80000121
29/01/2005 01:00:00	30.0144564
29/01/2005 02:00:00	30.21003278
29/01/2005 03:00:00	30.38789814
29/01/2005 04:00:00	30.54922028
29/01/2005 05:00:00	30.69516701
29/01/2005 06:00:00	30.82690612
29/01/2005 07:00:00	30.94560542
29/01/2005 08:00:00	31.0524327
29/01/2005 09:00:00	31.14855577
29/01/2005 10:00:00	31.23514243
29/01/2005 11:00:00	31.31336047
29/01/2005 12:00:00	31.3843777
29/01/2005 13:00:00	31.44936191
29/01/2005 14:00:00	31.50948092
29/01/2005 15:00:00	31.56590252
29/01/2005 16:00:00	31.6197945
29/01/2005 17:00:00	31.67232467
29/01/2005 18:00:00	31.72466084
29/01/2005 19:00:00	31.77797079
29/01/2005 20:00:00	31.83342234
29/01/2005 21:00:00	31.89218328
29/01/2005 22:00:00	31.95542141
29/01/2005 23:00:00	32.02430453
30/01/2005 00:00:00	32.10000044
30/01/2005 01:00:00	32.18334442
30/01/2005 02:00:00	32.27384164
30/01/2005 03:00:00	32.37066474
30/01/2005 04:00:00	32.47298639
30/01/2005 05:00:00	32.57997923
30/01/2005 06:00:00	32.69081593
30/01/2005 07:00:00	32.80466913
30/01/2005 08:00:00	32.92071149
30/01/2005 09:00:00	33.03811566
30/01/2005 10:00:00	33.1560543
30/01/2005 11:00:00	33.27370005
30/01/2005 12:00:00	33.39022558
30/01/2005 13:00:00	33.50480354
30/01/2005 14:00:00	33.61660658
30/01/2005 15:00:00	33.72480735
30/01/2005 16:00:00	33.82857851
30/01/2005 17:00:00	33.92709271
30/01/2005 18:00:00	34.0195226
30/01/2005 19:00:00	34.10504085
30/01/2005 20:00:00	34.1828201
30/01/2005 21:00:00	34.252033
30/01/2005 22:00:00	34.31185221
30/01/2005 23:00:00	34.36145039
31/01/2005 00:00:00	34.40000019
31/01/2005 01:00:00	34.4268942
31/01/2005 02:00:00	34.44240476
31/01/2005 03:00:00	34.44702417
31/01/2005 04:00:00	34.44124469
31/01/2005 05:00:00	34.4255586
31/01/2005 06:00:00	34.40045819
31/01/2005 07:00:00	34.36643573
31/01/2005 08:00:00	34.32398351
31/01/2005 09:00:00	34.2735938
31/01/2005 10:00:00	34.21575888
31/01/2005 11:00:00	34.15097102
31/01/2005 12:00:00	34.07972252
31/01/2005 13:00:00	34.00250565
31/01/2005 14:00:00	33.91981268
31/01/2005 15:00:00	33.8321359
31/01/2005 16:00:00	33.73996759
31/01/2005 17:00:00	33.64380002
31/01/2005 18:00:00	33.54412548
31/01/2005 19:00:00	33.44143623
31/01/2005 20:00:00	33.33622457
31/01/2005 21:00:00	33.22898278
31/01/2005 22:00:00	33.12020312
31/01/2005 23:00:00	33.01037788
01/02/2005 00:00:00	32.89999934
01/02/2005 01:00:00	32.78940318
01/02/2005 02:00:00	32.67829866
01/02/2005 03:00:00	32.56623846
01/02/2005 04:00:00	32.45277526
01/02/2005 05:00:00	32.33746173
01/02/2005 06:00:00	32.21985054
01/02/2005 07:00:00	32.09949437
01/02/2005 08:00:00	31.97594589
01/02/2005 09:00:00	31.84875777
01/02/2005 10:00:00	31.7174827
01/02/2005 11:00:00	31.58167334
01/02/2005 12:00:00	31.44088237
01/02/2005 13:00:00	31.29466247
01/02/2005 14:00:00	31.1425663
01/02/2005 15:00:00	30.98414654
01/02/2005 16:00:00	30.81895587
01/02/2005 17:00:00	30.64654696
01/02/2005 18:00:00	30.46647249
01/02/2005 19:00:00	30.27828512
01/02/2005 20:00:00	30.08153754
01/02/2005 21:00:00	29.87578241
01/02/2005 22:00:00	29.66057242
01/02/2005 23:00:00	29.43546023
02/02/2005 00:00:00	29.19999852
02/02/2005 01:00:00	28.95398006
02/02/2005 02:00:00	28.69815796
02/02/2005 03:00:00	28.43352544
02/02/2005 04:00:00	28.1610757
02/02/2005 05:00:00	27.88180193
02/02/2005 06:00:00	27.59669735
02/02/2005 07:00:00	27.30675516
02/02/2005 08:00:00	27.01296857
02/02/2005 09:00:00	26.71633077
02/02/2005 10:00:00	26.41783497
02/02/2005 11:00:00	26.11847439
02/02/2005 12:00:00	25.81924221
02/02/2005 13:00:00	25.52113165
02/02/2005 14:00:00	25.22513592
02/02/2005 15:00:00	24.9322482
02/02/2005 16:00:00	24.64346172
02/02/2005 17:00:00	24.35976967
02/02/2005 18:00:00	24.08216526
02/02/2005 19:00:00	23.81164169
02/02/2005 20:00:00	23.54919217
02/02/2005 21:00:00	23.2958099
02/02/2005 22:00:00	23.05248809
02/02/2005 23:00:00	22.82021993
03/02/2005 00:00:00	22.59999864
03/02/2005 01:00:00	22.39254897
03/02/2005 02:00:00	22.19752185
03/02/2005 03:00:00	22.01429977
03/02/2005 04:00:00	21.84226524
03/02/2005 05:00:00	21.68080074
03/02/2005 06:00:00	21.52928878
03/02/2005 07:00:00	21.38711184
03/02/2005 08:00:00	21.25365241
03/02/2005 09:00:00	21.128293
03/02/2005 10:00:00	21.0104161
03/02/2005 11:00:00	20.8994042
03/02/2005 12:00:00	20.79463979
03/02/2005 13:00:00	20.69550538
03/02/2005 14:00:00	20.60138345
03/02/2005 15:00:00	20.51165649
03/02/2005 16:00:00	20.42570701
03/02/2005 17:00:00	20.3429175
03/02/2005 18:00:00	20.26267044
03/02/2005 19:00:00	20.18434835
03/02/2005 20:00:00	20.1073337
03/02/2005 21:00:00	20.03100899
03/02/2005 22:00:00	19.95475673
03/02/2005 23:00:00	19.87795939
04/02/2005 00:00:00	19.79999949
04/02/2005 01:00:00	19.72041324
04/02/2005 02:00:00	19.63935187
04/02/2005 03:00:00	19.55712031
04/02/2005 04:00:00	19.47402351
04/02/2005 05:00:00	19.39036641
04/02/2005 06:00:00	19.30645396
04/02/2005 07:00:00	19.22259109
04/02/2005 08:00:00	19.13908276
04/02/2005 09:00:00	19.0562339
04/02/2005 10:00:00	18.97434946
04/02/2005 11:00:00	18.89373438
04/02/2005 12:00:00	18.81469361
04/02/2005 13:00:00	18.73753209
04/02/2005 14:00:00	18.66255477
04/02/2005 15:00:00	18.59006658
04/02/2005 16:00:00	18.52037247
04/02/2005 17:00:00	18.45377739
04/02/2005 18:00:00	18.39058628
04/02/2005 19:00:00	18.33110407
04/02/2005 20:00:00	18.27563573
04/02/2005 21:00:00	18.22448618
04/02/2005 22:00:00	18.17796038
04/02/2005 23:00:00	18.13636326
05/02/2005 00:00:00	18.09999977
05/02/2005 01:00:00	18.06905259
05/02/2005 02:00:00	18.04321532
05/02/2005 03:00:00	18.0220593
05/02/2005 04:00:00	18.00515588
05/02/2005 05:00:00	17.9920764
05/02/2005 06:00:00	17.9823922
05/02/2005 07:00:00	17.97567462
05/02/2005 08:00:00	17.971495
05/02/2005 09:00:00	17.9694247
05/02/2005 10:00:00	17.96903504
05/02/2005 11:00:00	17.96989738
05/02/2005 12:00:00	17.97158305
05/02/2005 13:00:00	17.9736634
05/02/2005 14:00:00	17.97570977
05/02/2005 15:00:00	17.97729349
05/02/2005 16:00:00	17.97798593
05/02/2005 17:00:00	17.97735841
05/02/2005 18:00:00	17.97498228
05/02/2005 19:00:00	17.97042888
05/02/2005 20:00:00	17.96326955
05/02/2005 21:00:00	17.95307564
05/02/2005 22:00:00	17.93941849
05/02/2005 23:00:00	17.92186944
06/02/2005 00:00:00	17.89999983
06/02/2005 01:00:00	17.87374528
06/02/2005 02:00:00	17.84449843
06/02/2005 03:00:00	17.81401621
06/02/2005 04:00:00	17.78405551
06/02/2005 05:00:00	17.75637325
06/02/2005 06:00:00	17.73272634
06/02/2005 07:00:00	17.71487168
06/02/2005 08:00:00	17.70456619
06/02/2005 09:00:00	17.70356677
06/02/2005 10:00:00	17.71363033
06/02/2005 11:00:00	17.73651379
06/02/2005 12:00:00	17.77397405
06/02/2005 13:00:00	17.82776802
06/02/2005 14:00:00	17.8996526
06/02/2005 15:00:00	17.99138472
06/02/2005 16:00:00	18.10472128
06/02/2005 17:00:00	18.24141918
06/02/2005 18:00:00	18.40323534
06/02/2005 19:00:00	18.59192667
06/02/2005 20:00:00	18.80925007
06/02/2005 21:00:00	19.05696246
06/02/2005 22:00:00	19.33682074
06/02/2005 23:00:00	19.65058182
07/02/2005 00:00:00	20.00000261
07/02/2005 01:00:00	20.38621415
07/02/2005 02:00:00	20.807844
07/02/2005 03:00:00	21.26289387
07/02/2005 04:00:00	21.74936548
07/02/2005 05:00:00	22.26526055
07/02/2005 06:00:00	22.80858079
07/02/2005 07:00:00	23.37732791
07/02/2005 08:00:00	23.96950364
07/02/2005 09:00:00	24.58310969
07/02/2005 10:00:00	25.21614777
07/02/2005 11:00:00	25.8666196
07/02/2005 12:00:00	26.53252689
07/02/2005 13:00:00	27.21187137
07/02/2005 14:00:00	27.90265474
07/02/2005 15:00:00	28.60287871
07/02/2005 16:00:00	29.31054502
07/02/2005 17:00:00	30.02365536
07/02/2005 18:00:00	30.74021147
07/02/2005 19:00:00	31.45821504
07/02/2005 20:00:00	32.1756678
07/02/2005 21:00:00	32.89057147
07/02/2005 22:00:00	33.60092775
07/02/2005 23:00:00	34.30473837
08/02/2005 00:00:00	35.00000504
08/02/2005 01:00:00	35.68499512
08/02/2005 02:00:00	36.35903859
08/02/2005 03:00:00	37.02173104
08/02/2005 04:00:00	37.67266808
08/02/2005 05:00:00	38.31144531
08/02/2005 06:00:00	38.93765833
08/02/2005 07:00:00	39.55090276
08/02/2005 08:00:00	40.15077419
08/02/2005 09:00:00	40.73686823
08/02/2005 10:00:00	41.30878048
08/02/2005 11:00:00	41.86610654
08/02/2005 12:00:00	42.40844203
08/02/2005 13:00:00	42.93538253
08/02/2005 14:00:00	43.44652367
08/02/2005 15:00:00	43.94146104
08/02/2005 16:00:00	44.41979024
08/02/2005 17:00:00	44.88110688
08/02/2005 18:00:00	45.32500657
08/02/2005 19:00:00	45.7510849
08/02/2005 20:00:00	46.15893748
08/02/2005 21:00:00	46.54815992
08/02/2005 22:00:00	46.91834782
08/02/2005 23:00:00	47.26909678
09/02/2005 00:00:00	47.6000024
09/02/2005 01:00:00	47.91065037
09/02/2005 02:00:00	48.20058661
09/02/2005 03:00:00	48.46934714
09/02/2005 04:00:00	48.71646796
09/02/2005 05:00:00	48.94148508
09/02/2005 06:00:00	49.14393451
09/02/2005 07:00:00	49.32335225
09/02/2005 08:00:00	49.47927432
09/02/2005 09:00:00	49.61123672
09/02/2005 10:00:00	49.71877546
09/02/2005 11:00:00	49.80142655
09/02/2005 12:00:00	49.85872599
09/02/2005 13:00:00	49.8902098
09/02/2005 14:00:00	49.89541397
09/02/2005 15:00:00	49.87387452
09/02/2005 16:00:00	49.82512745
09/02/2005 17:00:00	49.74870878
09/02/2005 18:00:00	49.64415451
09/02/2005 19:00:00	49.51100064
09/02/2005 20:00:00	49.34878319
09/02/2005 21:00:00	49.15703817
09/02/2005 22:00:00	48.93530157
09/02/2005 23:00:00	48.68310942
10/02/2005 00:00:00	48.39999771
10/02/2005 01:00:00	48.08585524
10/02/2005 02:00:00	47.74198198
10/02/2005 03:00:00	47.37003063
10/02/2005 04:00:00	46.97165394
10/02/2005 05:00:00	46.54850463
10/02/2005 06:00:00	46.10223541
10/02/2005 07:00:00	45.63449903
10/02/2005 08:00:00	45.1469482
10/02/2005 09:00:00	44.64123565
10/02/2005 10:00:00	44.11901412
10/02/2005 11:00:00	43.58193632
10/02/2005 12:00:00	43.03165498
10/02/2005 13:00:00	42.46982283
10/02/2005 14:00:00	41.8980926
10/02/2005 15:00:00	41.318117
10/02/2005 16:00:00	40.73154878
10/02/2005 17:00:00	40.14004065
10/02/2005 18:00:00	39.54524535
10/02/2005 19:00:00	38.94881559
10/02/2005 20:00:00	38.35240411
10/02/2005 21:00:00	37.75766363
10/02/2005 22:00:00	37.16624688
10/02/2005 23:00:00	36.57980658
11/02/2005 00:00:00	35.99999547
11/02/2005 01:00:00	35.42825138
11/02/2005 02:00:00	34.8651527
11/02/2005 03:00:00	34.31106292
11/02/2005 04:00:00	33.76634555
11/02/2005 05:00:00	33.23136409
11/02/2005 06:00:00	32.70648203
11/02/2005 07:00:00	32.1920629
11/02/2005 08:00:00	31.68847018
11/02/2005 09:00:00	31.19606738
11/02/2005 10:00:00	30.71521801
11/02/2005 11:00:00	30.24628556
11/02/2005 12:00:00	29.78963354
11/02/2005 13:00:00	29.34562545
11/02/2005 14:00:00	28.9146248
11/02/2005 15:00:00	28.49699508
11/02/2005 16:00:00	28.09309981
11/02/2005 17:00:00	27.70330248
11/02/2005 18:00:00	27.32796659
11/02/2005 19:00:00	26.96745565
11/02/2005 20:00:00	26.62213317
11/02/2005 21:00:00	26.29236264
11/02/2005 22:00:00	25.97850757
11/02/2005 23:00:00	25.68093145
12/02/2005 00:00:00	25.3999978
12/02/2005 01:00:00	25.13588237
12/02/2005 02:00:00	24.8880099
12/02/2005 03:00:00	24.65561741
12/02/2005 04:00:00	24.43794192
12/02/2005 05:00:00	24.23422043
12/02/2005 06:00:00	24.04368996
12/02/2005 07:00:00	23.86558752
12/02/2005 08:00:00	23.69915012
12/02/2005 09:00:00	23.54361477
12/02/2005 10:00:00	23.39821849
12/02/2005 11:00:00	23.26219829
12/02/2005 12:00:00	23.13479118
12/02/2005 13:00:00	23.01523417
12/02/2005 14:00:00	22.90276428
12/02/2005 15:00:00	22.79661851
12/02/2005 16:00:00	22.69603388
12/02/2005 17:00:00	22.6002474
12/02/2005 18:00:00	22.50849609
12/02/2005 19:00:00	22.42001695
12/02/2005 20:00:00	22.334047
12/02/2005 21:00:00	22.24982324
12/02/2005 22:00:00	22.1665827
12/02/2005 23:00:00	22.08356239
13/02/2005 00:00:00	21.99999931
13/02/2005 01:00:00	21.91533679
13/02/2005 02:00:00	21.82984345
13/02/2005 03:00:00	21.74399417
13/02/2005 04:00:00	21.65826388
13/02/2005 05:00:00	21.57312747
13/02/2005 06:00:00	21.48905985
13/02/2005 07:00:00	21.40653593
13/02/2005 08:00:00	21.32603062
13/02/2005 09:00:00	21.24801883
13/02/2005 10:00:00	21.17297545
13/02/2005 11:00:00	21.1013754
13/02/2005 12:00:00	21.03369359
13/02/2005 13:00:00	20.97040491
13/02/2005 14:00:00	20.91198429
13/02/2005 15:00:00	20.85890661
13/02/2005 16:00:00	20.81164681
13/02/2005 17:00:00	20.77067976
13/02/2005 18:00:00	20.7364804
13/02/2005 19:00:00	20.70952362
13/02/2005 20:00:00	20.69028432
13/02/2005 21:00:00	20.67923743
13/02/2005 22:00:00	20.67685783
13/02/2005 23:00:00	20.68362045
14/02/2005 00:00:00	20.70000018
14/02/2005 01:00:00	20.72629738
14/02/2005 02:00:00	20.76211419
14/02/2005 03:00:00	20.80687821
14/02/2005 04:00:00	20.86001704
14/02/2005 05:00:00	20.92095826
14/02/2005 06:00:00	20.98912948
14/02/2005 07:00:00	21.0639583
14/02/2005 08:00:00	21.1448723
14/02/2005 09:00:00	21.23129909
14/02/2005 10:00:00	21.32266626
14/02/2005 11:00:00	21.41840142
14/02/2005 12:00:00	21.51793214
14/02/2005 13:00:00	21.62068604
14/02/2005 14:00:00	21.72609071
14/02/2005 15:00:00	21.83357374
14/02/2005 16:00:00	21.94256274
14/02/2005 17:00:00	22.05248529
14/02/2005 18:00:00	22.16276899
14/02/2005 19:00:00	22.27284145
14/02/2005 20:00:00	22.38213025
14/02/2005 21:00:00	22.490063
14/02/2005 22:00:00	22.59606728
14/02/2005 23:00:00	22.6995707
15/02/2005 00:00:00	22.80000085
15/02/2005 01:00:00	22.8972049
15/02/2005 02:00:00	22.99270821
15/02/2005 03:00:00	23.0884557
15/02/2005 04:00:00	23.18639229
15/02/2005 05:00:00	23.2884629
15/02/2005 06:00:00	23.39661244
15/02/2005 07:00:00	23.51278582
15/02/2005 08:00:00	23.63892796
15/02/2005 09:00:00	23.77698377
15/02/2005 10:00:00	23.92889819
15/02/2005 11:00:00	24.09661611
15/02/2005 12:00:00	24.28208245
15/02/2005 13:00:00	24.48724213
15/02/2005 14:00:00	24.71404008
15/02/2005 15:00:00	24.96442119
15/02/2005 16:00:00	25.24033039
15/02/2005 17:00:00	25.54371259
15/02/2005 18:00:00	25.87651272
15/02/2005 19:00:00	26.24067567
15/02/2005 20:00:00	26.63814638
15/02/2005 21:00:00	27.07086976
15/02/2005 22:00:00	27.54079072
15/02/2005 23:00:00	28.04985417
16/02/2005 00:00:00	28.60000505
16/02/2005 01:00:00	29.19226327
16/02/2005 02:00:00	29.82394894
16/02/2005 03:00:00	30.49145723
16/02/2005 04:00:00	31.19118332
16/02/2005 05:00:00	31.91952237
16/02/2005 06:00:00	32.67286956
16/02/2005 07:00:00	33.44762006
16/02/2005 08:00:00	34.24016903
16/02/2005 09:00:00	35.04691166
16/02/2005 10:00:00	35.8642431
16/02/2005 11:00:00	36.68855853
16/02/2005 12:00:00	37.51625313
16/02/2005 13:00:00	38.34372205
16/02/2005 14:00:00	39.16736049
16/02/2005 15:00:00	39.98356359
16/02/2005 16:00:00	40.78872654
16/02/2005 17:00:00	41.57924451
16/02/2005 18:00:00	42.35151267
16/02/2005 19:00:00	43.10192618
16/02/2005 20:00:00	43.82688022
16/02/2005 21:00:00	44.52276997
16/02/2005 22:00:00	45.18599058
16/02/2005 23:00:00	45.81293724
17/02/2005 00:00:00	46.40000511
17/02/2005 01:00:00	46.94438123
17/02/2005 02:00:00	47.44642006
17/02/2005 03:00:00	47.90726787
17/02/2005 04:00:00	48.32807093
17/02/2005 05:00:00	48.70997551
17/02/2005 06:00:00	49.0541279
17/02/2005 07:00:00	49.36167436
17/02/2005 08:00:00	49.63376118
17/02/2005 09:00:00	49.87153463
17/02/2005 10:00:00	50.07614097
17/02/2005 11:00:00	50.2487265
17/02/2005 12:00:00	50.39043748
17/02/2005 13:00:00	50.50242018
17/02/2005 14:00:00	50.58582089
17/02/2005 15:00:00	50.64178588
17/02/2005 16:00:00	50.67146142
17/02/2005 17:00:00	50.67599378
17/02/2005 18:00:00	50.65652925
17/02/2005 19:00:00	50.6142141
17/02/2005 20:00:00	50.5501946
17/02/2005 21:00:00	50.46561703
17/02/2005 22:00:00	50.36162766
17/02/2005 23:00:00	50.23937278
18/02/2005 00:00:00	50.09999864
18/02/2005 01:00:00	49.94464433
18/02/2005 02:00:00	49.77442011
18/02/2005 03:00:00	49.59042904
18/02/2005 04:00:00	49.39377419
18/02/2005 05:00:00	49.18555862
18/02/2005 06:00:00	48.96688538
18/02/2005 07:00:00	48.73885754
18/02/2005 08:00:00	48.50257817
18/02/2005 09:00:00	48.25915033
18/02/2005 10:00:00	48.00967707
18/02/2005 11:00:00	47.75526146
18/02/2005 12:00:00	47.49700656
18/02/2005 13:00:00	47.23601544
18/02/2005 14:00:00	46.97339115
18/02/2005 15:00:00	46.71023677
18/02/2005 16:00:00	46.44765534
18/02/2005 17:00:00	46.18674994
18/02/2005 18:00:00	45.92862362
18/02/2005 19:00:00	45.67437945
18/02/2005 20:00:00	45.42512049
18/02/2005 21:00:00	45.1819498
18/02/2005 22:00:00	44.94597045
18/02/2005 23:00:00	44.71828549
19/02/2005 00:00:00	44.49999799
19/02/2005 01:00:00	44.29210625
19/02/2005 02:00:00	44.09518948
19/02/2005 03:00:00	43.90972214
19/02/2005 04:00:00	43.73617872
19/02/2005 05:00:00	43.57503365
19/02/2005 06:00:00	43.42676141
19/02/2005 07:00:00	43.29183646
19/02/2005 08:00:00	43.17073327
19/02/2005 09:00:00	43.06392629
19/02/2005 10:00:00	42.97188998
19/02/2005 11:00:00	42.89509881
19/02/2005 12:00:00	42.83402725
19/02/2005 13:00:00	42.78914974
19/02/2005 14:00:00	42.76094077
19/02/2005 15:00:00	42.74987478
19/02/2005 16:00:00	42.75642625
19/02/2005 17:00:00	42.78106962
19/02/2005 18:00:00	42.82427938
19/02/2005 19:00:00	42.88652997
19/02/2005 20:00:00	42.96829586
19/02/2005 21:00:00	43.07005152
19/02/2005 22:00:00	43.1922714
19/02/2005 23:00:00	43.33542997
20/02/2005 00:00:00	43.50000168
20/02/2005 01:00:00	43.68607709
20/02/2005 02:00:00	43.89221105
20/02/2005 03:00:00	44.11657452
20/02/2005 04:00:00	44.35733848
20/02/2005 05:00:00	44.61267387
20/02/2005 06:00:00	44.88075168
20/02/2005 07:00:00	45.15974285
20/02/2005 08:00:00	45.44781836
20/02/2005 09:00:00	45.74314917
20/02/2005 10:00:00	46.04390623
20/02/2005 11:00:00	46.34826051
20/02/2005 12:00:00	46.65438298
20/02/2005 13:00:00	46.9604446
20/02/2005 14:00:00	47.26461634
20/02/2005 15:00:00	47.56506914
20/02/2005 16:00:00	47.85997399
20/02/2005 17:00:00	48.14750183
20/02/2005 18:00:00	48.42582364
20/02/2005 19:00:00	48.69311038
20/02/2005 20:00:00	48.94753301
20/02/2005 21:00:00	49.1872625
20/02/2005 22:00:00	49.4104698
20/02/2005 23:00:00	49.61532588
21/02/2005 00:00:00	49.8000017
21/02/2005 01:00:00	49.96312957
21/02/2005 02:00:00	50.10518708
21/02/2005 03:00:00	50.22711314
21/02/2005 04:00:00	50.32984666
21/02/2005 05:00:00	50.41432653
21/02/2005 06:00:00	50.48149167
21/02/2005 07:00:00	50.53228099
21/02/2005 08:00:00	50.5676334
21/02/2005 09:00:00	50.58848779
21/02/2005 10:00:00	50.59578308
21/02/2005 11:00:00	50.59045817
21/02/2005 12:00:00	50.57345197
21/02/2005 13:00:00	50.54570339
21/02/2005 14:00:00	50.50815134
21/02/2005 15:00:00	50.46173471
21/02/2005 16:00:00	50.40739243
21/02/2005 17:00:00	50.34606339
21/02/2005 18:00:00	50.2786865
21/02/2005 19:00:00	50.20620067
21/02/2005 20:00:00	50.12954481
21/02/2005 21:00:00	50.04965782
21/02/2005 22:00:00	49.96747861
21/02/2005 23:00:00	49.88394609
22/02/2005 00:00:00	49.79999916
22/02/2005 01:00:00	49.71641744
22/02/2005 02:00:00	49.63334333
22/02/2005 03:00:00	49.55075998
22/02/2005 04:00:00	49.46865052
22/02/2005 05:00:00	49.38699807
22/02/2005 06:00:00	49.30578577
22/02/2005 07:00:00	49.22499675
22/02/2005 08:00:00	49.14461413
22/02/2005 09:00:00	49.06462106
22/02/2005 10:00:00	48.98500067
22/02/2005 11:00:00	48.90573607
22/02/2005 12:00:00	48.82681042
22/02/2005 13:00:00	48.74820682
22/02/2005 14:00:00	48.66990843
22/02/2005 15:00:00	48.59189836
22/02/2005 16:00:00	48.51415976
22/02/2005 17:00:00	48.43667574
22/02/2005 18:00:00	48.35942945
22/02/2005 19:00:00	48.28240402
22/02/2005 20:00:00	48.20558256
22/02/2005 21:00:00	48.12894823
22/02/2005 22:00:00	48.05248414
22/02/2005 23:00:00	47.97617343
23/02/2005 00:00:00	47.89999923
23/02/2005 01:00:00	47.82404819
23/02/2005 02:00:00	47.74882107
23/02/2005 03:00:00	47.67492212
23/02/2005 04:00:00	47.6029556
23/02/2005 05:00:00	47.53352578
23/02/2005 06:00:00	47.46723692
23/02/2005 07:00:00	47.40469329
23/02/2005 08:00:00	47.34649914
23/02/2005 09:00:00	47.29325874
23/02/2005 10:00:00	47.24557635
23/02/2005 11:00:00	47.20405623
23/02/2005 12:00:00	47.16930265
23/02/2005 13:00:00	47.14191986
23/02/2005 14:00:00	47.12251214
23/02/2005 15:00:00	47.11168374
23/02/2005 16:00:00	47.11003893
23/02/2005 17:00:00	47.11818197
23/02/2005 18:00:00	47.13671711
23/02/2005 19:00:00	47.16624864
23/02/2005 20:00:00	47.20738079
23/02/2005 21:00:00	47.26071785
23/02/2005 22:00:00	47.32686407
23/02/2005 23:00:00	47.40642371
24/02/2005 00:00:00	47.50000104
24/02/2005 01:00:00	47.60786595
24/02/2005 02:00:00	47.72895087
24/02/2005 03:00:00	47.86185388
24/02/2005 04:00:00	48.00517306
24/02/2005 05:00:00	48.15750651
24/02/2005 06:00:00	48.31745229
24/02/2005 07:00:00	48.4836085
24/02/2005 08:00:00	48.65457321
24/02/2005 09:00:00	48.82894451
24/02/2005 10:00:00	49.00532048
24/02/2005 11:00:00	49.1822992
24/02/2005 12:00:00	49.35847876
24/02/2005 13:00:00	49.53245723
24/02/2005 14:00:00	49.7028327
24/02/2005 15:00:00	49.86820326
24/02/2005 16:00:00	50.02716698
24/02/2005 17:00:00	50.17832194
24/02/2005 18:00:00	50.32026623
24/02/2005 19:00:00	50.45159794
24/02/2005 20:00:00	50.57091513
24/02/2005 21:00:00	50.67681591
24/02/2005 22:00:00	50.76789834
24/02/2005 23:00:00	50.84276051
25/02/2005 00:00:00	50.90000051
25/02/2005 01:00:00	50.93848825
25/02/2005 02:00:00	50.95818102
25/02/2005 03:00:00	50.95930792
25/02/2005 04:00:00	50.94209805
25/02/2005 05:00:00	50.9067805
25/02/2005 06:00:00	50.8535844
25/02/2005 07:00:00	50.78273882
25/02/2005 08:00:00	50.69447289
25/02/2005 09:00:00	50.5890157
25/02/2005 10:00:00	50.46659635
25/02/2005 11:00:00	50.32744395
25/02/2005 12:00:00	50.17178759
25/02/2005 13:00:00	49.99985639
25/02/2005 14:00:00	49.81187944
25/02/2005 15:00:00	49.60808584
25/02/2005 16:00:00	49.3887047
25/02/2005 17:00:00	49.15396512
25/02/2005 18:00:00	48.9040962
25/02/2005 19:00:00	48.63932705
25/02/2005 20:00:00	48.35988676
25/02/2005 21:00:00	48.06600444
25/02/2005 22:00:00	47.75790919
25/02/2005 23:00:00	47.43583012
26/02/2005 00:00:00	47.09999632
26/02/2005 01:00:00	46.75080261
26/02/2005 02:00:00	46.38930665
26/02/2005 03:00:00	46.01673178
26/02/2005 04:00:00	45.63430138
26/02/2005 05:00:00	45.24323878
26/02/2005 06:00:00	44.84476735
26/02/2005 07:00:00	44.44011045
26/02/2005 08:00:00	44.03049142
26/02/2005 09:00:00	43.61713362
26/02/2005 10:00:00	43.20126042
26/02/2005 11:00:00	42.78409516
26/02/2005 12:00:00	42.3668612
26/02/2005 13:00:00	41.95078189
26/02/2005 14:00:00	41.5370806
26/02/2005 15:00:00	41.12698068
26/02/2005 16:00:00	40.72170547
26/02/2005 17:00:00	40.32247835
26/02/2005 18:00:00	39.93052266
26/02/2005 19:00:00	39.54706176
26/02/2005 20:00:00	39.17331901
26/02/2005 21:00:00	38.81051775
26/02/2005 22:00:00	38.45988136
26/02/2005 23:00:00	38.12263317
27/02/2005 00:00:00	37.79999655
27/02/2005 01:00:00	37.49288952
27/02/2005 02:00:00	37.20100875
27/02/2005 03:00:00	36.92374561
27/02/2005 04:00:00	36.66049147
27/02/2005 05:00:00	36.41063769
27/02/2005 06:00:00	36.17357564
27/02/2005 07:00:00	35.94869667
27/02/2005 08:00:00	35.73539216
27/02/2005 09:00:00	35.53305346
27/02/2005 10:00:00	35.34107195
27/02/2005 11:00:00	35.15883898
27/02/2005 12:00:00	34.98574592
27/02/2005 13:00:00	34.82118414
27/02/2005 14:00:00	34.66454499
27/02/2005 15:00:00	34.51521985
27/02/2005 16:00:00	34.37260007
27/02/2005 17:00:00	34.23607702
27/02/2005 18:00:00	34.10504207
27/02/2005 19:00:00	33.97888658
27/02/2005 20:00:00	33.85700192
27/02/2005 21:00:00	33.73877944
27/02/2005 22:00:00	33.62361051
27/02/2005 23:00:00	33.5108865
28/02/2005 00:00:00	33.39999877
28/02/2005 01:00:00	33.29041051
28/02/2005 02:00:00	33.1818722
28/02/2005 03:00:00	33.07420614
28/02/2005 04:00:00	32.96723462
28/02/2005 05:00:00	32.86077995
28/02/2005 06:00:00	32.75466441
28/02/2005 07:00:00	32.64871032
28/02/2005 08:00:00	32.54273997
28/02/2005 09:00:00	32.43657566
28/02/2005 10:00:00	32.33003968
28/02/2005 11:00:00	32.22295434
28/02/2005 12:00:00	32.11514193
28/02/2005 13:00:00	32.00642475
28/02/2005 14:00:00	31.89662511
28/02/2005 15:00:00	31.78556529
28/02/2005 16:00:00	31.6730676
28/02/2005 17:00:00	31.55895434
28/02/2005 18:00:00	31.4430478
28/02/2005 19:00:00	31.32517029
28/02/2005 20:00:00	31.20514409
28/02/2005 21:00:00	31.08279152
28/02/2005 22:00:00	30.95793486
28/02/2005 23:00:00	30.83039643
01/03/2005 00:00:00	30.69999851
01/03/2005 01:00:00	30.56664655
01/03/2005 02:00:00	30.43057859
01/03/2005 03:00:00	30.2921158
01/03/2005 04:00:00	30.15157937
01/03/2005 05:00:00	30.00929047
01/03/2005 06:00:00	29.86557028
01/03/2005 07:00:00	29.72073998
01/03/2005 08:00:00	29.57512074
01/03/2005 09:00:00	29.42903374
01/03/2005 10:00:00	29.28280016
01/03/2005 11:00:00	29.13674118
01/03/2005 12:00:00	28.99117797
01/03/2005 13:00:00	28.84643172
01/03/2005 14:00:00	28.7028236
01/03/2005 15:00:00	28.56067479
01/03/2005 16:00:00	28.42030646
01/03/2005 17:00:00	28.2820398
01/03/2005 18:00:00	28.14619598
01/03/2005 19:00:00	28.01309618
01/03/2005 20:00:00	27.88306158
01/03/2005 21:00:00	27.75641336
01/03/2005 22:00:00	27.63347268
01/03/2005 23:00:00	27.51456074
02/03/2005 00:00:00	27.39999871
02/03/2005 01:00:00	27.29000717
02/03/2005 02:00:00	27.18440435
02/03/2005 03:00:00	27.0829079
02/03/2005 04:00:00	26.98523546
02/03/2005 05:00:00	26.89110467
02/03/2005 06:00:00	26.80023317
02/03/2005 07:00:00	26.71233862
02/03/2005 08:00:00	26.62713864
02/03/2005 09:00:00	26.5443509
02/03/2005 10:00:00	26.46369302
02/03/2005 11:00:00	26.38488265
02/03/2005 12:00:00	26.30763743
02/03/2005 13:00:00	26.23167502
02/03/2005 14:00:00	26.15671304
02/03/2005 15:00:00	26.08246915
02/03/2005 16:00:00	26.00866099
02/03/2005 17:00:00	25.93500619
02/03/2005 18:00:00	25.86122241
02/03/2005 19:00:00	25.78702729
02/03/2005 20:00:00	25.71213847
02/03/2005 21:00:00	25.63627359
02/03/2005 22:00:00	25.5591503
02/03/2005 23:00:00	25.48048624
03/03/2005 00:00:00	25.39999905
03/03/2005 01:00:00	25.31750857
03/03/2005 02:00:00	25.23324344
03/03/2005 03:00:00	25.14753447
03/03/2005 04:00:00	25.06071248
03/03/2005 05:00:00	24.97310829
03/03/2005 06:00:00	24.88505271
03/03/2005 07:00:00	24.79687658
03/03/2005 08:00:00	24.70891069
03/03/2005 09:00:00	24.62148589
03/03/2005 10:00:00	24.53493297
03/03/2005 11:00:00	24.44958277
03/03/2005 12:00:00	24.3657661
03/03/2005 13:00:00	24.28381378
03/03/2005 14:00:00	24.20405663
03/03/2005 15:00:00	24.12682547
03/03/2005 16:00:00	24.05245111
03/03/2005 17:00:00	23.98126438
03/03/2005 18:00:00	23.91359609
03/03/2005 19:00:00	23.84977707
03/03/2005 20:00:00	23.79013813
03/03/2005 21:00:00	23.73501009
03/03/2005 22:00:00	23.68472377
03/03/2005 23:00:00	23.63960999
04/03/2005 00:00:00	23.59999956
04/03/2005 01:00:00	23.56608873
04/03/2005 02:00:00	23.53753538
04/03/2005 03:00:00	23.51386283
04/03/2005 04:00:00	23.4945944
04/03/2005 05:00:00	23.47925341
04/03/2005 06:00:00	23.46736317
04/03/2005 07:00:00	23.458447
04/03/2005 08:00:00	23.45202822
04/03/2005 09:00:00	23.44763015
04/03/2005 10:00:00	23.4447761
04/03/2005 11:00:00	23.44298939
04/03/2005 12:00:00	23.44179334
04/03/2005 13:00:00	23.44071127
04/03/2005 14:00:00	23.43926649
04/03/2005 15:00:00	23.43698232
04/03/2005 16:00:00	23.43338207
04/03/2005 17:00:00	23.42798907
04/03/2005 18:00:00	23.42032663
04/03/2005 19:00:00	23.40991808
04/03/2005 20:00:00	23.39628672
04/03/2005 21:00:00	23.37895587
04/03/2005 22:00:00	23.35744885
04/03/2005 23:00:00	23.33128899
05/03/2005 00:00:00	23.29999959
05/03/2005 01:00:00	23.2632363
05/03/2005 02:00:00	23.22118403
05/03/2005 03:00:00	23.17416002
05/03/2005 04:00:00	23.12248149
05/03/2005 05:00:00	23.06646568
05/03/2005 06:00:00	23.00642982
05/03/2005 07:00:00	22.94269115
05/03/2005 08:00:00	22.87556688
05/03/2005 09:00:00	22.80537425
05/03/2005 10:00:00	22.7324305
05/03/2005 11:00:00	22.65705285
05/03/2005 12:00:00	22.57955854
05/03/2005 13:00:00	22.50026479
05/03/2005 14:00:00	22.41948884
05/03/2005 15:00:00	22.33754792
05/03/2005 16:00:00	22.25475926
05/03/2005 17:00:00	22.17144009
05/03/2005 18:00:00	22.08790764
05/03/2005 19:00:00	22.00447914
05/03/2005 20:00:00	21.92147183
05/03/2005 21:00:00	21.83920294
05/03/2005 22:00:00	21.75798969
05/03/2005 23:00:00	21.67814932
06/03/2005 00:00:00	21.59999905
06/03/2005 01:00:00	21.52379419
06/03/2005 02:00:00	21.44954226
06/03/2005 03:00:00	21.37718889
06/03/2005 04:00:00	21.30667966
06/03/2005 05:00:00	21.23796019
06/03/2005 06:00:00	21.17097608
06/03/2005 07:00:00	21.10567294
06/03/2005 08:00:00	21.04199638
06/03/2005 09:00:00	20.97989199
06/03/2005 10:00:00	20.91930539
06/03/2005 11:00:00	20.86018218
06/03/2005 12:00:00	20.80246796
06/03/2005 13:00:00	20.74610835
06/03/2005 14:00:00	20.69104894
06/03/2005 15:00:00	20.63723535
06/03/2005 16:00:00	20.58461317
06/03/2005 17:00:00	20.53312801
06/03/2005 18:00:00	20.48272549
06/03/2005 19:00:00	20.4333512
06/03/2005 20:00:00	20.38495074
06/03/2005 21:00:00	20.33746974
06/03/2005 22:00:00	20.29085378
06/03/2005 23:00:00	20.24504848
07/03/2005 00:00:00	20.19999944
07/03/2005 01:00:00	20.15566643
07/03/2005 02:00:00	20.11206584
07/03/2005 03:00:00	20.06922823
07/03/2005 04:00:00	20.02718416
07/03/2005 05:00:00	19.98596417
07/03/2005 06:00:00	19.94559883
07/03/2005 07:00:00	19.90611868
07/03/2005 08:00:00	19.8675543
07/03/2005 09:00:00	19.82993622
07/03/2005 10:00:00	19.793295
07/03/2005 11:00:00	19.75766121
07/03/2005 12:00:00	19.72306539
07/03/2005 13:00:00	19.68953811
07/03/2005 14:00:00	19.65710991
07/03/2005 15:00:00	19.62581135
07/03/2005 16:00:00	19.59567298
07/03/2005 17:00:00	19.56672537
07/03/2005 18:00:00	19.53899906
07/03/2005 19:00:00	19.51252462
07/03/2005 20:00:00	19.48733259
07/03/2005 21:00:00	19.46345354
07/03/2005 22:00:00	19.44091801
07/03/2005 23:00:00	19.41975657
08/03/2005 00:00:00	19.39999976
08/03/2005 01:00:00	19.38162558
08/03/2005 02:00:00	19.36440174
08/03/2005 03:00:00	19.34804342
08/03/2005 04:00:00	19.33226576
08/03/2005 05:00:00	19.31678393
08/03/2005 06:00:00	19.30131309
08/03/2005 07:00:00	19.2855684
08/03/2005 08:00:00	19.26926502
08/03/2005 09:00:00	19.2521181
08/03/2005 10:00:00	19.23384281
08/03/2005 11:00:00	19.21415431
08/03/2005 12:00:00	19.19276775
08/03/2005 13:00:00	19.1693983
08/03/2005 14:00:00	19.14376112
08/03/2005 15:00:00	19.11557137
08/03/2005 16:00:00	19.0845442
08/03/2005 17:00:00	19.05039478
08/03/2005 18:00:00	19.01283826
08/03/2005 19:00:00	18.97158981
08/03/2005 20:00:00	18.92636459
08/03/2005 21:00:00	18.87687775
08/03/2005 22:00:00	18.82284445
08/03/2005 23:00:00	18.76397987
09/03/2005 00:00:00	18.69999914
09/03/2005 01:00:00	18.6308642
09/03/2005 02:00:00	18.5575239
09/03/2005 03:00:00	18.48117388
09/03/2005 04:00:00	18.40300973
09/03/2005 05:00:00	18.32422707
09/03/2005 06:00:00	18.24602151
09/03/2005 07:00:00	18.16958866
09/03/2005 08:00:00	18.09612413
09/03/2005 09:00:00	18.02682353
09/03/2005 10:00:00	17.96288247
09/03/2005 11:00:00	17.90549657
09/03/2005 12:00:00	17.85586144
09/03/2005 13:00:00	17.81517268
09/03/2005 14:00:00	17.78462591
09/03/2005 15:00:00	17.76541673
09/03/2005 16:00:00	17.75874077
09/03/2005 17:00:00	17.76579363
09/03/2005 18:00:00	17.78777092
09/03/2005 19:00:00	17.82586825
09/03/2005 20:00:00	17.88128123
09/03/2005 21:00:00	17.95520548
09/03/2005 22:00:00	18.04883661
09/03/2005 23:00:00	18.16337022
10/03/2005 00:00:00	18.30000193
10/03/2005 01:00:00	18.45978143
10/03/2005 02:00:00	18.64317473
10/03/2005 03:00:00	18.85050193
10/03/2005 04:00:00	19.08208315
10/03/2005 05:00:00	19.33823848
10/03/2005 06:00:00	19.61928802
10/03/2005 07:00:00	19.9255519
10/03/2005 08:00:00	20.2573502
10/03/2005 09:00:00	20.61500304
10/03/2005 10:00:00	20.99883051
10/03/2005 11:00:00	21.40915273
10/03/2005 12:00:00	21.84628979
10/03/2005 13:00:00	22.3105618
10/03/2005 14:00:00	22.80228887
10/03/2005 15:00:00	23.3217911
10/03/2005 16:00:00	23.86938859
10/03/2005 17:00:00	24.44540145
10/03/2005 18:00:00	25.05014979
10/03/2005 19:00:00	25.6839537
10/03/2005 20:00:00	26.3471333
10/03/2005 21:00:00	27.04000868
10/03/2005 22:00:00	27.76289995
10/03/2005 23:00:00	28.51612722
11/03/2005 00:00:00	29.30001059
11/03/2005 01:00:00	30.11420157
11/03/2005 02:00:00	30.95567739
11/03/2005 03:00:00	31.82074675
11/03/2005 04:00:00	32.70571835
11/03/2005 05:00:00	33.60690086
11/03/2005 06:00:00	34.520603
11/03/2005 07:00:00	35.44313344
11/03/2005 08:00:00	36.3708009
11/03/2005 09:00:00	37.29991404
11/03/2005 10:00:00	38.22678158
11/03/2005 11:00:00	39.14771221
11/03/2005 12:00:00	40.05901461
11/03/2005 13:00:00	40.95699748
11/03/2005 14:00:00	41.83796952
11/03/2005 15:00:00	42.69823941
11/03/2005 16:00:00	43.53411586
11/03/2005 17:00:00	44.34190755
11/03/2005 18:00:00	45.11792318
11/03/2005 19:00:00	45.85847143
11/03/2005 20:00:00	46.55986102
11/03/2005 21:00:00	47.21840061
11/03/2005 22:00:00	47.83039892
11/03/2005 23:00:00	48.39216464
12/03/2005 00:00:00	48.90000645
12/03/2005 01:00:00	49.3512593
12/03/2005 02:00:00	49.74736298
12/03/2005 03:00:00	50.09078344
12/03/2005 04:00:00	50.38398665
12/03/2005 05:00:00	50.62943855
12/03/2005 06:00:00	50.8296051
12/03/2005 07:00:00	50.98695225
12/03/2005 08:00:00	51.10394597
12/03/2005 09:00:00	51.1830522
12/03/2005 10:00:00	51.22673691
12/03/2005 11:00:00	51.23746604
12/03/2005 12:00:00	51.21770555
12/03/2005 13:00:00	51.16992141
12/03/2005 14:00:00	51.09657955
12/03/2005 15:00:00	51.00014595
12/03/2005 16:00:00	50.88308655
12/03/2005 17:00:00	50.74786731
12/03/2005 18:00:00	50.59695419
12/03/2005 19:00:00	50.43281313
12/03/2005 20:00:00	50.25791011
12/03/2005 21:00:00	50.07471106
12/03/2005 22:00:00	49.88568195
12/03/2005 23:00:00	49.69328874
13/03/2005 00:00:00	49.49999737
13/03/2005 01:00:00	49.30758635
13/03/2005 02:00:00	49.11508445
13/03/2005 03:00:00	48.92083304
13/03/2005 04:00:00	48.7231735
13/03/2005 05:00:00	48.52044721
13/03/2005 06:00:00	48.31099553
13/03/2005 07:00:00	48.09315985
13/03/2005 08:00:00	47.86528152
13/03/2005 09:00:00	47.62570194
13/03/2005 10:00:00	47.37276248
13/03/2005 11:00:00	47.10480449
13/03/2005 12:00:00	46.82016937
13/03/2005 13:00:00	46.51719849
13/03/2005 14:00:00	46.19423321
13/03/2005 15:00:00	45.84961492
13/03/2005 16:00:00	45.48168499
13/03/2005 17:00:00	45.08878478
13/03/2005 18:00:00	44.66925569
13/03/2005 19:00:00	44.22143907
13/03/2005 20:00:00	43.7436763
13/03/2005 21:00:00	43.23430876
13/03/2005 22:00:00	42.69167782
13/03/2005 23:00:00	42.11412486
14/03/2005 00:00:00	41.49999125
14/03/2005 01:00:00	40.84848832
14/03/2005 02:00:00	40.16230709
14/03/2005 03:00:00	39.44500848
14/03/2005 04:00:00	38.7001534
14/03/2005 05:00:00	37.93130274
14/03/2005 06:00:00	37.14201743
14/03/2005 07:00:00	36.33585838
14/03/2005 08:00:00	35.51638649
14/03/2005 09:00:00	34.68716267
14/03/2005 10:00:00	33.85174783
14/03/2005 11:00:00	33.01370288
14/03/2005 12:00:00	32.17658874
14/03/2005 13:00:00	31.34396631
14/03/2005 14:00:00	30.51939649
14/03/2005 15:00:00	29.70644021
14/03/2005 16:00:00	28.90865837
14/03/2005 17:00:00	28.12961188
14/03/2005 18:00:00	27.37286165
14/03/2005 19:00:00	26.64196858
14/03/2005 20:00:00	25.9404936
14/03/2005 21:00:00	25.2719976
14/03/2005 22:00:00	24.6400415
14/03/2005 23:00:00	24.04818621
15/03/2005 00:00:00	23.49999264
15/03/2005 01:00:00	22.99806678
15/03/2005 02:00:00	22.54119512
15/03/2005 03:00:00	22.12720931
15/03/2005 04:00:00	21.75394101
15/03/2005 05:00:00	21.41922188
15/03/2005 06:00:00	21.12088357
15/03/2005 07:00:00	20.85675772
15/03/2005 08:00:00	20.62467601
15/03/2005 09:00:00	20.42247007
15/03/2005 10:00:00	20.24797158
15/03/2005 11:00:00	20.09901217
15/03/2005 12:00:00	19.97342351
15/03/2005 13:00:00	19.86903724
15/03/2005 14:00:00	19.78368503
15/03/2005 15:00:00	19.71519852
15/03/2005 16:00:00	19.66140938
15/03/2005 17:00:00	19.62014925
15/03/2005 18:00:00	19.58924979
15/03/2005 19:00:00	19.56654266
15/03/2005 20:00:00	19.54985951
15/03/2005 21:00:00	19.53703199
15/03/2005 22:00:00	19.52589175
15/03/2005 23:00:00	19.51427046
16/03/2005 00:00:00	19.49999977
16/03/2005 01:00:00	19.48131463
16/03/2005 02:00:00	19.45806313
16/03/2005 03:00:00	19.43049664
16/03/2005 04:00:00	19.39886653
16/03/2005 05:00:00	19.36342414
16/03/2005 06:00:00	19.32442085
16/03/2005 07:00:00	19.28210801
16/03/2005 08:00:00	19.236737
16/03/2005 09:00:00	19.18855916
16/03/2005 10:00:00	19.13782586
16/03/2005 11:00:00	19.08478847
16/03/2005 12:00:00	19.02969834
16/03/2005 13:00:00	18.97280684
16/03/2005 14:00:00	18.91436532
16/03/2005 15:00:00	18.85462516
16/03/2005 16:00:00	18.79383771
16/03/2005 17:00:00	18.73225433
16/03/2005 18:00:00	18.67012639
16/03/2005 19:00:00	18.60770524
16/03/2005 20:00:00	18.54524226
16/03/2005 21:00:00	18.48298879
16/03/2005 22:00:00	18.42119621
16/03/2005 23:00:00	18.36011587
17/03/2005 00:00:00	18.29999914
17/03/2005 01:00:00	18.24102505
17/03/2005 02:00:00	18.18308334
17/03/2005 03:00:00	18.12599141
17/03/2005 04:00:00	18.06956668
17/03/2005 05:00:00	18.01362656
17/03/2005 06:00:00	17.95798846
17/03/2005 07:00:00	17.9024698
17/03/2005 08:00:00	17.84688799
17/03/2005 09:00:00	17.79106044
17/03/2005 10:00:00	17.73480456
17/03/2005 11:00:00	17.67793777
17/03/2005 12:00:00	17.62027747
17/03/2005 13:00:00	17.56164109
17/03/2005 14:00:00	17.50184602
17/03/2005 15:00:00	17.44070969
17/03/2005 16:00:00	17.37804951
17/03/2005 17:00:00	17.31368288
17/03/2005 18:00:00	17.24742723
17/03/2005 19:00:00	17.17909996
17/03/2005 20:00:00	17.10851848
17/03/2005 21:00:00	17.03550022
17/03/2005 22:00:00	16.95986257
17/03/2005 23:00:00	16.88142296
18/03/2005 00:00:00	16.79999879
18/03/2005 01:00:00	16.71566966
18/03/2005 02:00:00	16.62956386
18/03/2005 03:00:00	16.54307184
18/03/2005 04:00:00	16.45758403
18/03/2005 05:00:00	16.3744909
18/03/2005 06:00:00	16.29518288
18/03/2005 07:00:00	16.22105043
18/03/2005 08:00:00	16.15348399
18/03/2005 09:00:00	16.09387401
18/03/2005 10:00:00	16.04361093
18/03/2005 11:00:00	16.00408521
18/03/2005 12:00:00	15.97668729
18/03/2005 13:00:00	15.96280762
18/03/2005 14:00:00	15.96383664
18/03/2005 15:00:00	15.98116481
18/03/2005 16:00:00	16.01618257
18/03/2005 17:00:00	16.07028036
18/03/2005 18:00:00	16.14484864
18/03/2005 19:00:00	16.24127786
18/03/2005 20:00:00	16.36095845
18/03/2005 21:00:00	16.50528087
18/03/2005 22:00:00	16.67563557
18/03/2005 23:00:00	16.87341298
19/03/2005 00:00:00	17.10000357
19/03/2005 01:00:00	17.3561903
19/03/2005 02:00:00	17.6403264
19/03/2005 03:00:00	17.95015766
19/03/2005 04:00:00	18.28342987
19/03/2005 05:00:00	18.63788884
19/03/2005 06:00:00	19.01128037
19/03/2005 07:00:00	19.40135024
19/03/2005 08:00:00	19.80584427
19/03/2005 09:00:00	20.22250825
19/03/2005 10:00:00	20.64908798
19/03/2005 11:00:00	21.08332925
19/03/2005 12:00:00	21.52297787
19/03/2005 13:00:00	21.96577963
19/03/2005 14:00:00	22.40948033
19/03/2005 15:00:00	22.85182577
19/03/2005 16:00:00	23.29056175
19/03/2005 17:00:00	23.72343406
19/03/2005 18:00:00	24.14818851
19/03/2005 19:00:00	24.5625709
19/03/2005 20:00:00	24.96432701
19/03/2005 21:00:00	25.35120266
19/03/2005 22:00:00	25.72094363
19/03/2005 23:00:00	26.07129573
20/03/2005 00:00:00	26.40000475
20/03/2005 01:00:00	26.7053131
20/03/2005 02:00:00	26.98744954
20/03/2005 03:00:00	27.24713939
20/03/2005 04:00:00	27.48510795
20/03/2005 05:00:00	27.70208055
20/03/2005 06:00:00	27.8987825
20/03/2005 07:00:00	28.07593913
20/03/2005 08:00:00	28.23427575
20/03/2005 09:00:00	28.37451767
20/03/2005 10:00:00	28.49739022
20/03/2005 11:00:00	28.60361871
20/03/2005 12:00:00	28.69392847
20/03/2005 13:00:00	28.76904479
20/03/2005 14:00:00	28.82969302
20/03/2005 15:00:00	28.87659845
20/03/2005 16:00:00	28.91048641
20/03/2005 17:00:00	28.93208223
20/03/2005 18:00:00	28.9421112
20/03/2005 19:00:00	28.94129866
20/03/2005 20:00:00	28.93036991
20/03/2005 21:00:00	28.91005029
20/03/2005 22:00:00	28.88106509
20/03/2005 23:00:00	28.84413965
21/03/2005 00:00:00	28.79999928
21/03/2005 01:00:00	28.74933587
21/03/2005 02:00:00	28.69270766
21/03/2005 03:00:00	28.63063944
21/03/2005 04:00:00	28.56365603
21/03/2005 05:00:00	28.49228222
21/03/2005 06:00:00	28.41704284
21/03/2005 07:00:00	28.33846268
21/03/2005 08:00:00	28.25706655
21/03/2005 09:00:00	28.17337926
21/03/2005 10:00:00	28.08792561
21/03/2005 11:00:00	28.00123042
21/03/2005 12:00:00	27.91381849
21/03/2005 13:00:00	27.82621462
21/03/2005 14:00:00	27.73894362
21/03/2005 15:00:00	27.65253031
21/03/2005 16:00:00	27.56749948
21/03/2005 17:00:00	27.48437595
21/03/2005 18:00:00	27.40368451
21/03/2005 19:00:00	27.32594998
21/03/2005 20:00:00	27.25169717
21/03/2005 21:00:00	27.18145088
21/03/2005 22:00:00	27.11573592
21/03/2005 23:00:00	27.05507709
22/03/2005 00:00:00	26.9999992
22/03/2005 01:00:00	26.95117775
22/03/2005 02:00:00	26.909891
22/03/2005 03:00:00	26.87756786
22/03/2005 04:00:00	26.85563727
22/03/2005 05:00:00	26.84552815
22/03/2005 06:00:00	26.84866942
22/03/2005 07:00:00	26.86649003
22/03/2005 08:00:00	26.90041889
22/03/2005 09:00:00	26.95188493
22/03/2005 10:00:00	27.02231707
22/03/2005 11:00:00	27.11314426
22/03/2005 12:00:00	27.22579541
22/03/2005 13:00:00	27.36169944
22/03/2005 14:00:00	27.5222853
22/03/2005 15:00:00	27.7089819
22/03/2005 16:00:00	27.92321818
22/03/2005 17:00:00	28.16642305
22/03/2005 18:00:00	28.44002545
22/03/2005 19:00:00	28.74545431
22/03/2005 20:00:00	29.08413855
22/03/2005 21:00:00	29.45750709
22/03/2005 22:00:00	29.86698888
22/03/2005 23:00:00	30.31401283
23/03/2005 00:00:00	30.80000787
23/03/2005 01:00:00	31.32571783
23/03/2005 02:00:00	31.88914625
23/03/2005 03:00:00	32.48761165
23/03/2005 04:00:00	33.11843255
23/03/2005 05:00:00	33.77892744
23/03/2005 06:00:00	34.46641485
23/03/2005 07:00:00	35.17821328
23/03/2005 08:00:00	35.91164124
23/03/2005 09:00:00	36.66401726
23/03/2005 10:00:00	37.43265983
23/03/2005 11:00:00	38.21488748
23/03/2005 12:00:00	39.0080187
23/03/2005 13:00:00	39.80937202
23/03/2005 14:00:00	40.61626595
23/03/2005 15:00:00	41.42601899
23/03/2005 16:00:00	42.23594967
23/03/2005 17:00:00	43.04337648
23/03/2005 18:00:00	43.84561794
23/03/2005 19:00:00	44.63999257
23/03/2005 20:00:00	45.42381888
23/03/2005 21:00:00	46.19441537
23/03/2005 22:00:00	46.94910055
23/03/2005 23:00:00	47.68519295
24/03/2005 00:00:00	48.40001107
24/03/2005 01:00:00	49.09143758
24/03/2005 02:00:00	49.75961165
24/03/2005 03:00:00	50.40523656
24/03/2005 04:00:00	51.02901558
24/03/2005 05:00:00	51.63165199
24/03/2005 06:00:00	52.21384907
24/03/2005 07:00:00	52.77631009
24/03/2005 08:00:00	53.31973834
24/03/2005 09:00:00	53.84483707
24/03/2005 10:00:00	54.35230958
24/03/2005 11:00:00	54.84285914
24/03/2005 12:00:00	55.31718901
24/03/2005 13:00:00	55.77600249
24/03/2005 14:00:00	56.22000285
24/03/2005 15:00:00	56.64989335
24/03/2005 16:00:00	57.06637728
24/03/2005 17:00:00	57.47015792
24/03/2005 18:00:00	57.86193854
24/03/2005 19:00:00	58.24242241
24/03/2005 20:00:00	58.61231281
24/03/2005 21:00:00	58.97231303
24/03/2005 22:00:00	59.32312632
24/03/2005 23:00:00	59.66545598
25/03/2005 00:00:00	60.00000527
25/03/2005 01:00:00	60.32719364
25/03/2005 02:00:00	60.64630522
25/03/2005 03:00:00	60.95634035
25/03/2005 04:00:00	61.25629934
25/03/2005 05:00:00	61.54518253
25/03/2005 06:00:00	61.82199026
[truncated: 6,761 more rows]
