# Supplementary material for: Flood Prediction in Ungauged Basins by Physical-Based TOPKAPI Model
Source: Hindawi journal article supplement (doi:10.1155/2019/4795853), 2019-09-05
Supplement: f1 [file 4795853.f1.zip › 4795853.f1/xxdis_2006.csv]

time	50100500
01/01/2006 00:00:00	28.3
01/01/2006 01:00:00	28.41026325
01/01/2006 02:00:00	28.49907002
01/01/2006 03:00:00	28.56769287
01/01/2006 04:00:00	28.61740438
01/01/2006 05:00:00	28.6494771
01/01/2006 06:00:00	28.6651836
01/01/2006 07:00:00	28.66579644
01/01/2006 08:00:00	28.65258818
01/01/2006 09:00:00	28.6268314
01/01/2006 10:00:00	28.58979866
01/01/2006 11:00:00	28.54276251
01/01/2006 12:00:00	28.48699553
01/01/2006 13:00:00	28.42377028
01/01/2006 14:00:00	28.35435932
01/01/2006 15:00:00	28.28003522
01/01/2006 16:00:00	28.20207054
01/01/2006 17:00:00	28.12173784
01/01/2006 18:00:00	28.0403097
01/01/2006 19:00:00	27.95905867
01/01/2006 20:00:00	27.87925732
01/01/2006 21:00:00	27.80217821
01/01/2006 22:00:00	27.72909391
01/01/2006 23:00:00	27.66127698
02/01/2006 00:00:00	27.59999999
02/01/2006 01:00:00	27.5465355
02/01/2006 02:00:00	27.50215607
02/01/2006 03:00:00	27.46813427
02/01/2006 04:00:00	27.44574266
02/01/2006 05:00:00	27.43625382
02/01/2006 06:00:00	27.44094029
02/01/2006 07:00:00	27.46107465
02/01/2006 08:00:00	27.49792946
02/01/2006 09:00:00	27.55277729
02/01/2006 10:00:00	27.62689069
02/01/2006 11:00:00	27.72154224
02/01/2006 12:00:00	27.8380045
02/01/2006 13:00:00	27.97755003
02/01/2006 14:00:00	28.14145139
02/01/2006 15:00:00	28.33098116
02/01/2006 16:00:00	28.54741189
02/01/2006 17:00:00	28.79201615
02/01/2006 18:00:00	29.0660665
02/01/2006 19:00:00	29.37083551
02/01/2006 20:00:00	29.70759575
02/01/2006 21:00:00	30.07761977
02/01/2006 22:00:00	30.48218014
02/01/2006 23:00:00	30.92254942
03/01/2006 00:00:00	31.40000019
03/01/2006 01:00:00	31.91503157
03/01/2006 02:00:00	32.46504896
03/01/2006 03:00:00	33.04668433
03/01/2006 04:00:00	33.65656965
03/01/2006 05:00:00	34.2913369
03/01/2006 06:00:00	34.94761804
03/01/2006 07:00:00	35.62204504
03/01/2006 08:00:00	36.31124988
03/01/2006 09:00:00	37.01186452
03/01/2006 10:00:00	37.72052093
03/01/2006 11:00:00	38.43385109
03/01/2006 12:00:00	39.14848696
03/01/2006 13:00:00	39.86106051
03/01/2006 14:00:00	40.56820372
03/01/2006 15:00:00	41.26654856
03/01/2006 16:00:00	41.95272699
03/01/2006 17:00:00	42.62337098
03/01/2006 18:00:00	43.27511251
03/01/2006 19:00:00	43.90458355
03/01/2006 20:00:00	44.50841606
03/01/2006 21:00:00	45.08324201
03/01/2006 22:00:00	45.62569338
03/01/2006 23:00:00	46.13240214
04/01/2006 00:00:00	46.60000026
04/01/2006 01:00:00	47.02595648
04/01/2006 02:00:00	47.41108672
04/01/2006 03:00:00	47.75704365
04/01/2006 04:00:00	48.06547994
04/01/2006 05:00:00	48.33804828
04/01/2006 06:00:00	48.57640135
04/01/2006 07:00:00	48.78219183
04/01/2006 08:00:00	48.95707239
04/01/2006 09:00:00	49.10269572
04/01/2006 10:00:00	49.2207145
04/01/2006 11:00:00	49.3127814
04/01/2006 12:00:00	49.38054912
04/01/2006 13:00:00	49.42567031
04/01/2006 14:00:00	49.44979767
04/01/2006 15:00:00	49.45458388
04/01/2006 16:00:00	49.44168161
04/01/2006 17:00:00	49.41274355
04/01/2006 18:00:00	49.36942237
04/01/2006 19:00:00	49.31337075
04/01/2006 20:00:00	49.24624138
04/01/2006 21:00:00	49.16968693
04/01/2006 22:00:00	49.08536009
04/01/2006 23:00:00	48.99491353
05/01/2006 00:00:00	48.89999993
05/01/2006 01:00:00	48.80213605
05/01/2006 02:00:00	48.70229499
05/01/2006 03:00:00	48.60131391
05/01/2006 04:00:00	48.50002999
05/01/2006 05:00:00	48.39928041
05/01/2006 06:00:00	48.29990232
05/01/2006 07:00:00	48.20273291
05/01/2006 08:00:00	48.10860935
05/01/2006 09:00:00	48.01836881
05/01/2006 10:00:00	47.93284846
05/01/2006 11:00:00	47.85288547
05/01/2006 12:00:00	47.77931702
05/01/2006 13:00:00	47.71298027
05/01/2006 14:00:00	47.65471241
05/01/2006 15:00:00	47.6053506
05/01/2006 16:00:00	47.56573201
05/01/2006 17:00:00	47.53669382
05/01/2006 18:00:00	47.5190732
05/01/2006 19:00:00	47.51370732
05/01/2006 20:00:00	47.52143336
05/01/2006 21:00:00	47.54308848
05/01/2006 22:00:00	47.57950985
05/01/2006 23:00:00	47.63153466
06/01/2006 00:00:00	47.70000007
06/01/2006 01:00:00	47.78539951
06/01/2006 02:00:00	47.88685139
06/01/2006 03:00:00	48.00313039
06/01/2006 04:00:00	48.13301118
06/01/2006 05:00:00	48.27526844
06/01/2006 06:00:00	48.42867684
06/01/2006 07:00:00	48.59201104
06/01/2006 08:00:00	48.76404574
06/01/2006 09:00:00	48.94355559
06/01/2006 10:00:00	49.12931527
06/01/2006 11:00:00	49.32009946
06/01/2006 12:00:00	49.51468283
06/01/2006 13:00:00	49.71184004
06/01/2006 14:00:00	49.91034579
06/01/2006 15:00:00	50.10897473
06/01/2006 16:00:00	50.30650154
06/01/2006 17:00:00	50.50170089
06/01/2006 18:00:00	50.69334746
06/01/2006 19:00:00	50.88021593
06/01/2006 20:00:00	51.06108095
06/01/2006 21:00:00	51.23471722
06/01/2006 22:00:00	51.39989939
06/01/2006 23:00:00	51.55540215
07/01/2006 00:00:00	51.70000016
07/01/2006 01:00:00	51.83278545
07/01/2006 02:00:00	51.95411938
07/01/2006 03:00:00	52.06468068
07/01/2006 04:00:00	52.16514807
07/01/2006 05:00:00	52.25620027
07/01/2006 06:00:00	52.33851599
07/01/2006 07:00:00	52.41277395
07/01/2006 08:00:00	52.47965287
07/01/2006 09:00:00	52.53983146
07/01/2006 10:00:00	52.59398845
07/01/2006 11:00:00	52.64280256
07/01/2006 12:00:00	52.6869525
07/01/2006 13:00:00	52.72711698
07/01/2006 14:00:00	52.76397474
07/01/2006 15:00:00	52.79820448
07/01/2006 16:00:00	52.83048493
07/01/2006 17:00:00	52.8614948
07/01/2006 18:00:00	52.89191281
07/01/2006 19:00:00	52.92241768
07/01/2006 20:00:00	52.95368813
07/01/2006 21:00:00	52.98640287
07/01/2006 22:00:00	53.02124063
07/01/2006 23:00:00	53.05888012
08/01/2006 00:00:00	53.10000006
08/01/2006 01:00:00	53.14495396
08/01/2006 02:00:00	53.19279449
08/01/2006 03:00:00	53.24224912
08/01/2006 04:00:00	53.29204532
08/01/2006 05:00:00	53.34091056
08/01/2006 06:00:00	53.38757231
08/01/2006 07:00:00	53.43075803
08/01/2006 08:00:00	53.46919519
08/01/2006 09:00:00	53.50161126
08/01/2006 10:00:00	53.52673371
08/01/2006 11:00:00	53.54329
08/01/2006 12:00:00	53.55000761
08/01/2006 13:00:00	53.545614
08/01/2006 14:00:00	53.52883663
08/01/2006 15:00:00	53.49840299
08/01/2006 16:00:00	53.45304053
08/01/2006 17:00:00	53.39147672
08/01/2006 18:00:00	53.31243903
08/01/2006 19:00:00	53.21465493
08/01/2006 20:00:00	53.09685189
08/01/2006 21:00:00	52.95775738
08/01/2006 22:00:00	52.79609885
08/01/2006 23:00:00	52.61060379
09/01/2006 00:00:00	52.39999966
09/01/2006 01:00:00	52.16352722
09/01/2006 02:00:00	51.90248042
09/01/2006 03:00:00	51.61866652
09/01/2006 04:00:00	51.31389274
09/01/2006 05:00:00	50.98996634
09/01/2006 06:00:00	50.64869456
09/01/2006 07:00:00	50.29188464
09/01/2006 08:00:00	49.92134382
09/01/2006 09:00:00	49.53887935
09/01/2006 10:00:00	49.14629847
09/01/2006 11:00:00	48.74540843
09/01/2006 12:00:00	48.33801646
09/01/2006 13:00:00	47.92592981
09/01/2006 14:00:00	47.51095573
09/01/2006 15:00:00	47.09490145
09/01/2006 16:00:00	46.67957423
09/01/2006 17:00:00	46.26678129
09/01/2006 18:00:00	45.8583299
09/01/2006 19:00:00	45.45602728
09/01/2006 20:00:00	45.06168069
09/01/2006 21:00:00	44.67709736
09/01/2006 22:00:00	44.30408455
09/01/2006 23:00:00	43.94444949
10/01/2006 00:00:00	43.59999942
10/01/2006 01:00:00	43.27232548
10/01/2006 02:00:00	42.96215435
10/01/2006 03:00:00	42.6699966
10/01/2006 04:00:00	42.39636281
10/01/2006 05:00:00	42.14176356
10/01/2006 06:00:00	41.9067094
10/01/2006 07:00:00	41.69171092
10/01/2006 08:00:00	41.49727868
10/01/2006 09:00:00	41.32392327
10/01/2006 10:00:00	41.17215526
10/01/2006 11:00:00	41.04248521
10/01/2006 12:00:00	40.9354237
10/01/2006 13:00:00	40.85148131
10/01/2006 14:00:00	40.79116861
10/01/2006 15:00:00	40.75499616
10/01/2006 16:00:00	40.74347455
10/01/2006 17:00:00	40.75711434
10/01/2006 18:00:00	40.79642612
10/01/2006 19:00:00	40.86192044
10/01/2006 20:00:00	40.9541079
10/01/2006 21:00:00	41.07349905
10/01/2006 22:00:00	41.22060447
10/01/2006 23:00:00	41.39593474
11/01/2006 00:00:00	41.60000042
11/01/2006 01:00:00	41.83281689
11/01/2006 02:00:00	42.0924187
11/01/2006 03:00:00	42.3763452
11/01/2006 04:00:00	42.68213574
11/01/2006 05:00:00	43.00732969
11/01/2006 06:00:00	43.34946638
11/01/2006 07:00:00	43.70608518
11/01/2006 08:00:00	44.07472545
11/01/2006 09:00:00	44.45292652
11/01/2006 10:00:00	44.83822776
11/01/2006 11:00:00	45.22816852
11/01/2006 12:00:00	45.62028815
11/01/2006 13:00:00	46.01212601
11/01/2006 14:00:00	46.40122144
11/01/2006 15:00:00	46.78511381
11/01/2006 16:00:00	47.16134247
11/01/2006 17:00:00	47.52744677
11/01/2006 18:00:00	47.88096606
11/01/2006 19:00:00	48.21943969
11/01/2006 20:00:00	48.54040703
11/01/2006 21:00:00	48.84140742
11/01/2006 22:00:00	49.11998022
11/01/2006 23:00:00	49.37366478
12/01/2006 00:00:00	49.60000045
12/01/2006 01:00:00	49.79708868
12/01/2006 02:00:00	49.96527925
12/01/2006 03:00:00	50.10548405
12/01/2006 04:00:00	50.21861495
12/01/2006 05:00:00	50.30558382
12/01/2006 06:00:00	50.36730253
12/01/2006 07:00:00	50.40468296
12/01/2006 08:00:00	50.41863699
12/01/2006 09:00:00	50.41007648
12/01/2006 10:00:00	50.37991332
12/01/2006 11:00:00	50.32905937
12/01/2006 12:00:00	50.25842651
12/01/2006 13:00:00	50.16892662
12/01/2006 14:00:00	50.06147156
12/01/2006 15:00:00	49.93697322
12/01/2006 16:00:00	49.79634346
12/01/2006 17:00:00	49.64049417
12/01/2006 18:00:00	49.47033721
12/01/2006 19:00:00	49.28678446
12/01/2006 20:00:00	49.09074779
12/01/2006 21:00:00	48.88313908
12/01/2006 22:00:00	48.66487021
12/01/2006 23:00:00	48.43685304
13/01/2006 00:00:00	48.19999944
13/01/2006 01:00:00	47.95526938
13/01/2006 02:00:00	47.70381507
13/01/2006 03:00:00	47.44683683
13/01/2006 04:00:00	47.18553494
13/01/2006 05:00:00	46.92110973
13/01/2006 06:00:00	46.65476148
13/01/2006 07:00:00	46.3876905
13/01/2006 08:00:00	46.1210971
13/01/2006 09:00:00	45.85618157
13/01/2006 10:00:00	45.59414423
13/01/2006 11:00:00	45.33618536
13/01/2006 12:00:00	45.08350529
13/01/2006 13:00:00	44.8373043
13/01/2006 14:00:00	44.5987827
13/01/2006 15:00:00	44.36914079
13/01/2006 16:00:00	44.14957888
13/01/2006 17:00:00	43.94129727
13/01/2006 18:00:00	43.74549626
13/01/2006 19:00:00	43.56337615
13/01/2006 20:00:00	43.39613725
13/01/2006 21:00:00	43.24497987
13/01/2006 22:00:00	43.11110429
13/01/2006 23:00:00	42.99571083
14/01/2006 00:00:00	42.89999979
14/01/2006 01:00:00	42.82480771
14/01/2006 02:00:00	42.76951618
14/01/2006 03:00:00	42.73314299
14/01/2006 04:00:00	42.71470597
14/01/2006 05:00:00	42.71322294
14/01/2006 06:00:00	42.72771171
14/01/2006 07:00:00	42.7571901
14/01/2006 08:00:00	42.80067593
14/01/2006 09:00:00	42.85718702
14/01/2006 10:00:00	42.92574119
14/01/2006 11:00:00	43.00535625
14/01/2006 12:00:00	43.09505002
14/01/2006 13:00:00	43.19384031
14/01/2006 14:00:00	43.30074496
14/01/2006 15:00:00	43.41478177
14/01/2006 16:00:00	43.53496856
14/01/2006 17:00:00	43.66032315
14/01/2006 18:00:00	43.78986335
14/01/2006 19:00:00	43.922607
14/01/2006 20:00:00	44.05757189
14/01/2006 21:00:00	44.19377586
14/01/2006 22:00:00	44.33023671
14/01/2006 23:00:00	44.46597227
15/01/2006 00:00:00	44.60000036
15/01/2006 01:00:00	44.73151596
15/01/2006 02:00:00	44.86042276
15/01/2006 03:00:00	44.98680162
15/01/2006 04:00:00	45.1107334
15/01/2006 05:00:00	45.23229894
15/01/2006 06:00:00	45.35157912
15/01/2006 07:00:00	45.46865478
15/01/2006 08:00:00	45.58360678
15/01/2006 09:00:00	45.69651597
15/01/2006 10:00:00	45.80746323
15/01/2006 11:00:00	45.91652939
15/01/2006 12:00:00	46.02379533
15/01/2006 13:00:00	46.12934188
15/01/2006 14:00:00	46.23324992
15/01/2006 15:00:00	46.3356003
15/01/2006 16:00:00	46.43647387
15/01/2006 17:00:00	46.5359515
15/01/2006 18:00:00	46.63411403
15/01/2006 19:00:00	46.73104232
15/01/2006 20:00:00	46.82681724
15/01/2006 21:00:00	46.92151964
15/01/2006 22:00:00	47.01523037
15/01/2006 23:00:00	47.10803029
16/01/2006 00:00:00	47.20000026
16/01/2006 01:00:00	47.29099193
16/01/2006 02:00:00	47.37994013
16/01/2006 03:00:00	47.4655505
16/01/2006 04:00:00	47.54652865
16/01/2006 05:00:00	47.62158023
16/01/2006 06:00:00	47.68941086
16/01/2006 07:00:00	47.74872618
16/01/2006 08:00:00	47.79823181
16/01/2006 09:00:00	47.83663338
16/01/2006 10:00:00	47.86263653
16/01/2006 11:00:00	47.87494689
16/01/2006 12:00:00	47.87227008
16/01/2006 13:00:00	47.85331174
16/01/2006 14:00:00	47.81677749
16/01/2006 15:00:00	47.76137298
16/01/2006 16:00:00	47.68580382
16/01/2006 17:00:00	47.58877564
16/01/2006 18:00:00	47.46899409
16/01/2006 19:00:00	47.32516479
16/01/2006 20:00:00	47.15599337
16/01/2006 21:00:00	46.96018545
16/01/2006 22:00:00	46.73644668
16/01/2006 23:00:00	46.48348268
17/01/2006 00:00:00	46.19999908
17/01/2006 01:00:00	45.88554244
17/01/2006 02:00:00	45.54302298
17/01/2006 03:00:00	45.17619184
17/01/2006 04:00:00	44.78880015
17/01/2006 05:00:00	44.38459905
17/01/2006 06:00:00	43.96733968
17/01/2006 07:00:00	43.54077317
17/01/2006 08:00:00	43.10865065
17/01/2006 09:00:00	42.67472326
17/01/2006 10:00:00	42.24274213
17/01/2006 11:00:00	41.81645841
17/01/2006 12:00:00	41.39962322
17/01/2006 13:00:00	40.99598771
17/01/2006 14:00:00	40.609303
17/01/2006 15:00:00	40.24332023
17/01/2006 16:00:00	39.90179054
17/01/2006 17:00:00	39.58846507
17/01/2006 18:00:00	39.30709494
17/01/2006 19:00:00	39.0614313
17/01/2006 20:00:00	38.85522527
17/01/2006 21:00:00	38.692228
17/01/2006 22:00:00	38.57619061
17/01/2006 23:00:00	38.51086426
18/01/2006 00:00:00	38.50000006
18/01/2006 01:00:00	38.54641375
18/01/2006 02:00:00	38.64917951
18/01/2006 03:00:00	38.80643613
18/01/2006 04:00:00	39.01632237
18/01/2006 05:00:00	39.27697705
18/01/2006 06:00:00	39.58653893
18/01/2006 07:00:00	39.94314681
18/01/2006 08:00:00	40.34493948
18/01/2006 09:00:00	40.79005572
18/01/2006 10:00:00	41.27663432
18/01/2006 11:00:00	41.80281406
18/01/2006 12:00:00	42.36673374
18/01/2006 13:00:00	42.96653214
18/01/2006 14:00:00	43.60034804
18/01/2006 15:00:00	44.26632024
18/01/2006 16:00:00	44.96258751
18/01/2006 17:00:00	45.68728866
18/01/2006 18:00:00	46.43856245
18/01/2006 19:00:00	47.21454769
18/01/2006 20:00:00	48.01338316
18/01/2006 21:00:00	48.83320764
18/01/2006 22:00:00	49.67215992
18/01/2006 23:00:00	50.52837879
19/01/2006 00:00:00	51.40000304
19/01/2006 01:00:00	52.28536665
19/01/2006 02:00:00	53.18358448
19/01/2006 03:00:00	54.09396653
19/01/2006 04:00:00	55.01582287
19/01/2006 05:00:00	55.94846352
19/01/2006 06:00:00	56.89119851
19/01/2006 07:00:00	57.84333789
19/01/2006 08:00:00	58.8041917
19/01/2006 09:00:00	59.77306996
19/01/2006 10:00:00	60.74928271
19/01/2006 11:00:00	61.73214
19/01/2006 12:00:00	62.72095185
19/01/2006 13:00:00	63.71502831
19/01/2006 14:00:00	64.71367941
19/01/2006 15:00:00	65.71621519
19/01/2006 16:00:00	66.72194568
19/01/2006 17:00:00	67.73018092
19/01/2006 18:00:00	68.74023094
19/01/2006 19:00:00	69.75140579
19/01/2006 20:00:00	70.7630155
19/01/2006 21:00:00	71.77437011
19/01/2006 22:00:00	72.78477965
19/01/2006 23:00:00	73.79355415
20/01/2006 00:00:00	74.80000367
20/01/2006 01:00:00	75.80302131
20/01/2006 02:00:00	76.79983254
20/01/2006 03:00:00	77.78724595
20/01/2006 04:00:00	78.76207009
20/01/2006 05:00:00	79.72111353
20/01/2006 06:00:00	80.66118484
20/01/2006 07:00:00	81.57909258
20/01/2006 08:00:00	82.47164533
20/01/2006 09:00:00	83.33565164
20/01/2006 10:00:00	84.16792009
20/01/2006 11:00:00	84.96525924
20/01/2006 12:00:00	85.72447766
20/01/2006 13:00:00	86.44238391
20/01/2006 14:00:00	87.11578657
20/01/2006 15:00:00	87.7414942
20/01/2006 16:00:00	88.31631536
20/01/2006 17:00:00	88.83705863
20/01/2006 18:00:00	89.30053257
20/01/2006 19:00:00	89.70354575
20/01/2006 20:00:00	90.04290674
20/01/2006 21:00:00	90.31542409
20/01/2006 22:00:00	90.51790638
20/01/2006 23:00:00	90.64716218
21/01/2006 00:00:00	90.70000005
21/01/2006 01:00:00	90.67458528
21/01/2006 02:00:00	90.57450992
21/01/2006 03:00:00	90.40472274
21/01/2006 04:00:00	90.17017248
21/01/2006 05:00:00	89.8758079
21/01/2006 06:00:00	89.52657774
21/01/2006 07:00:00	89.12743076
21/01/2006 08:00:00	88.68331571
21/01/2006 09:00:00	88.19918134
21/01/2006 10:00:00	87.6799764
21/01/2006 11:00:00	87.13064964
21/01/2006 12:00:00	86.55614981
21/01/2006 13:00:00	85.96142567
21/01/2006 14:00:00	85.35142596
21/01/2006 15:00:00	84.73109944
21/01/2006 16:00:00	84.10539486
21/01/2006 17:00:00	83.47926097
21/01/2006 18:00:00	82.85764652
21/01/2006 19:00:00	82.24550025
21/01/2006 20:00:00	81.64777093
21/01/2006 21:00:00	81.06940731
21/01/2006 22:00:00	80.51535812
21/01/2006 23:00:00	79.99057214
22/01/2006 00:00:00	79.4999981
22/01/2006 01:00:00	79.04748835
22/01/2006 02:00:00	78.63250966
22/01/2006 03:00:00	78.25343241
22/01/2006 04:00:00	77.908627
22/01/2006 05:00:00	77.59646381
22/01/2006 06:00:00	77.31531323
22/01/2006 07:00:00	77.06354564
22/01/2006 08:00:00	76.83953143
22/01/2006 09:00:00	76.64164099
22/01/2006 10:00:00	76.46824471
22/01/2006 11:00:00	76.31771297
22/01/2006 12:00:00	76.18841616
22/01/2006 13:00:00	76.07872467
22/01/2006 14:00:00	75.98700888
22/01/2006 15:00:00	75.91163919
22/01/2006 16:00:00	75.85098598
22/01/2006 17:00:00	75.80341963
22/01/2006 18:00:00	75.76731054
22/01/2006 19:00:00	75.74102908
22/01/2006 20:00:00	75.72294566
22/01/2006 21:00:00	75.71143065
22/01/2006 22:00:00	75.70485445
22/01/2006 23:00:00	75.70158743
23/01/2006 00:00:00	75.69999999
23/01/2006 01:00:00	75.69860512
23/01/2006 02:00:00	75.69648616
23/01/2006 03:00:00	75.69286906
23/01/2006 04:00:00	75.68697979
23/01/2006 05:00:00	75.67804428
23/01/2006 06:00:00	75.66528849
23/01/2006 07:00:00	75.64793837
23/01/2006 08:00:00	75.62521987
23/01/2006 09:00:00	75.59635894
23/01/2006 10:00:00	75.56058152
23/01/2006 11:00:00	75.51711357
23/01/2006 12:00:00	75.46518104
23/01/2006 13:00:00	75.40400987
23/01/2006 14:00:00	75.33282602
23/01/2006 15:00:00	75.25085545
23/01/2006 16:00:00	75.15732408
23/01/2006 17:00:00	75.05145789
23/01/2006 18:00:00	74.93248281
23/01/2006 19:00:00	74.7996248
23/01/2006 20:00:00	74.65210981
23/01/2006 21:00:00	74.48916379
23/01/2006 22:00:00	74.31001268
23/01/2006 23:00:00	74.11388244
24/01/2006 00:00:00	73.89999902
24/01/2006 01:00:00	73.66805651
24/01/2006 02:00:00	73.41962163
24/01/2006 03:00:00	73.15672921
24/01/2006 04:00:00	72.8814141
24/01/2006 05:00:00	72.59571112
24/01/2006 06:00:00	72.30165513
24/01/2006 07:00:00	72.00128096
24/01/2006 08:00:00	71.69662345
24/01/2006 09:00:00	71.38971745
24/01/2006 10:00:00	71.08259779
24/01/2006 11:00:00	70.77729932
24/01/2006 12:00:00	70.47585688
24/01/2006 13:00:00	70.1803053
24/01/2006 14:00:00	69.89267944
24/01/2006 15:00:00	69.61501412
24/01/2006 16:00:00	69.34934419
24/01/2006 17:00:00	69.09770448
24/01/2006 18:00:00	68.86212985
24/01/2006 19:00:00	68.64465513
24/01/2006 20:00:00	68.44731517
24/01/2006 21:00:00	68.27214479
24/01/2006 22:00:00	68.12117885
24/01/2006 23:00:00	67.99645218
25/01/2006 00:00:00	67.89999962
25/01/2006 01:00:00	67.83335269
25/01/2006 02:00:00	67.7960296
25/01/2006 03:00:00	67.78704524
25/01/2006 04:00:00	67.8054145
25/01/2006 05:00:00	67.8501523
25/01/2006 06:00:00	67.92027351
25/01/2006 07:00:00	68.01479304
25/01/2006 08:00:00	68.13272578
25/01/2006 09:00:00	68.27308663
25/01/2006 10:00:00	68.43489049
25/01/2006 11:00:00	68.61715225
25/01/2006 12:00:00	68.8188868
25/01/2006 13:00:00	69.03910905
25/01/2006 14:00:00	69.27683388
25/01/2006 15:00:00	69.5310762
25/01/2006 16:00:00	69.8008509
25/01/2006 17:00:00	70.08517288
25/01/2006 18:00:00	70.38305703
25/01/2006 19:00:00	70.69351825
25/01/2006 20:00:00	71.01557144
25/01/2006 21:00:00	71.34823148
25/01/2006 22:00:00	71.69051328
25/01/2006 23:00:00	72.04143174
26/01/2006 00:00:00	72.40000174
26/01/2006 01:00:00	72.76522807
26/01/2006 02:00:00	73.13607503
26/01/2006 03:00:00	73.5114968
26/01/2006 04:00:00	73.89044758
26/01/2006 05:00:00	74.27188156
26/01/2006 06:00:00	74.6547529
26/01/2006 07:00:00	75.03801581
26/01/2006 08:00:00	75.42062447
26/01/2006 09:00:00	75.80153307
26/01/2006 10:00:00	76.17969579
26/01/2006 11:00:00	76.55406682
26/01/2006 12:00:00	76.92360034
26/01/2006 13:00:00	77.28725054
26/01/2006 14:00:00	77.64397162
26/01/2006 15:00:00	77.99271774
26/01/2006 16:00:00	78.33244311
26/01/2006 17:00:00	78.66210191
26/01/2006 18:00:00	78.98064831
26/01/2006 19:00:00	79.28703652
26/01/2006 20:00:00	79.58022072
26/01/2006 21:00:00	79.85915509
26/01/2006 22:00:00	80.12279382
26/01/2006 23:00:00	80.37009109
27/01/2006 00:00:00	80.6000011
27/01/2006 01:00:00	80.81181205
27/01/2006 02:00:00	81.00614822
27/01/2006 03:00:00	81.18396789
27/01/2006 04:00:00	81.34622936
27/01/2006 05:00:00	81.49389091
27/01/2006 06:00:00	81.62791083
27/01/2006 07:00:00	81.74924742
27/01/2006 08:00:00	81.85885896
27/01/2006 09:00:00	81.95770373
27/01/2006 10:00:00	82.04674003
27/01/2006 11:00:00	82.12692615
27/01/2006 12:00:00	82.19922037
27/01/2006 13:00:00	82.26458098
27/01/2006 14:00:00	82.32396628
27/01/2006 15:00:00	82.37833455
27/01/2006 16:00:00	82.42864408
27/01/2006 17:00:00	82.47585315
27/01/2006 18:00:00	82.52092007
27/01/2006 19:00:00	82.5648031
27/01/2006 20:00:00	82.60846056
27/01/2006 21:00:00	82.65285071
27/01/2006 22:00:00	82.69893186
27/01/2006 23:00:00	82.74766229
28/01/2006 00:00:00	82.80000028
28/01/2006 01:00:00	82.85662708
28/01/2006 02:00:00	82.91711572
28/01/2006 03:00:00	82.9807622
28/01/2006 04:00:00	83.0468625
28/01/2006 05:00:00	83.11471262
28/01/2006 06:00:00	83.18360855
28/01/2006 07:00:00	83.25284628
28/01/2006 08:00:00	83.3217218
28/01/2006 09:00:00	83.38953111
28/01/2006 10:00:00	83.4555702
28/01/2006 11:00:00	83.51913506
28/01/2006 12:00:00	83.57952169
28/01/2006 13:00:00	83.63602606
28/01/2006 14:00:00	83.68794419
28/01/2006 15:00:00	83.73457205
28/01/2006 16:00:00	83.77520565
28/01/2006 17:00:00	83.80914097
28/01/2006 18:00:00	83.835674
28/01/2006 19:00:00	83.85410074
28/01/2006 20:00:00	83.86371718
28/01/2006 21:00:00	83.86381932
28/01/2006 22:00:00	83.85370314
28/01/2006 23:00:00	83.83266463
29/01/2006 00:00:00	83.79999979
29/01/2006 01:00:00	83.75499755
29/01/2006 02:00:00	83.69691854
29/01/2006 03:00:00	83.62501634
29/01/2006 04:00:00	83.53854453
29/01/2006 05:00:00	83.43675668
29/01/2006 06:00:00	83.31890638
29/01/2006 07:00:00	83.18424719
29/01/2006 08:00:00	83.03203269
29/01/2006 09:00:00	82.86151647
29/01/2006 10:00:00	82.67195208
29/01/2006 11:00:00	82.46259312
29/01/2006 12:00:00	82.23269315
29/01/2006 13:00:00	81.98150576
29/01/2006 14:00:00	81.70828451
29/01/2006 15:00:00	81.41228299
29/01/2006 16:00:00	81.09275477
29/01/2006 17:00:00	80.74895343
29/01/2006 18:00:00	80.38013254
29/01/2006 19:00:00	79.98554567
29/01/2006 20:00:00	79.56444641
29/01/2006 21:00:00	79.11608833
29/01/2006 22:00:00	78.63972501
29/01/2006 23:00:00	78.13461002
30/01/2006 00:00:00	77.59999694
30/01/2006 01:00:00	77.03562552
30/01/2006 02:00:00	76.44318021
30/01/2006 03:00:00	75.82483162
30/01/2006 04:00:00	75.18275034
30/01/2006 05:00:00	74.51910699
30/01/2006 06:00:00	73.83607218
30/01/2006 07:00:00	73.1358165
30/01/2006 08:00:00	72.42051057
30/01/2006 09:00:00	71.692325
30/01/2006 10:00:00	70.95343038
30/01/2006 11:00:00	70.20599734
30/01/2006 12:00:00	69.45219646
30/01/2006 13:00:00	68.69419837
30/01/2006 14:00:00	67.93417366
30/01/2006 15:00:00	67.17429294
30/01/2006 16:00:00	66.41672682
30/01/2006 17:00:00	65.66364591
30/01/2006 18:00:00	64.91722081
30/01/2006 19:00:00	64.17962213
30/01/2006 20:00:00	63.45302048
30/01/2006 21:00:00	62.73958646
30/01/2006 22:00:00	62.04149068
30/01/2006 23:00:00	61.36090374
31/01/2006 00:00:00	60.69999625
31/01/2006 01:00:00	60.06046243
31/01/2006 02:00:00	59.44209091
31/01/2006 03:00:00	58.84419395
31/01/2006 04:00:00	58.26608382
31/01/2006 05:00:00	57.70707278
31/01/2006 06:00:00	57.1664731
31/01/2006 07:00:00	56.64359702
31/01/2006 08:00:00	56.13775682
31/01/2006 09:00:00	55.64826475
31/01/2006 10:00:00	55.17443308
31/01/2006 11:00:00	54.71557408
31/01/2006 12:00:00	54.27099999
31/01/2006 13:00:00	53.84002308
31/01/2006 14:00:00	53.42195563
31/01/2006 15:00:00	53.01610987
31/01/2006 16:00:00	52.62179809
31/01/2006 17:00:00	52.23833253
31/01/2006 18:00:00	51.86502547
31/01/2006 19:00:00	51.50118916
31/01/2006 20:00:00	51.14613586
31/01/2006 21:00:00	50.79917785
31/01/2006 22:00:00	50.45962737
31/01/2006 23:00:00	50.12679669
01/02/2006 00:00:00	49.79999807
01/02/2006 01:00:00	49.47871896
01/02/2006 02:00:00	49.16314751
01/02/2006 03:00:00	48.85364706
01/02/2006 04:00:00	48.55058093
01/02/2006 05:00:00	48.25431247
01/02/2006 06:00:00	47.96520499
01/02/2006 07:00:00	47.68362185
01/02/2006 08:00:00	47.40992636
01/02/2006 09:00:00	47.14448186
01/02/2006 10:00:00	46.88765168
01/02/2006 11:00:00	46.63979916
01/02/2006 12:00:00	46.40128763
01/02/2006 13:00:00	46.17248043
01/02/2006 14:00:00	45.95374087
01/02/2006 15:00:00	45.7454323
01/02/2006 16:00:00	45.54791805
01/02/2006 17:00:00	45.36156145
01/02/2006 18:00:00	45.18672584
01/02/2006 19:00:00	45.02377454
01/02/2006 20:00:00	44.87307089
01/02/2006 21:00:00	44.73497822
01/02/2006 22:00:00	44.60985987
01/02/2006 23:00:00	44.49807917
02/02/2006 00:00:00	44.39999944
02/02/2006 01:00:00	44.31576693
02/02/2006 02:00:00	44.24465953
02/02/2006 03:00:00	44.18573802
02/02/2006 04:00:00	44.13806321
02/02/2006 05:00:00	44.10069588
02/02/2006 06:00:00	44.07269685
02/02/2006 07:00:00	44.0531269
02/02/2006 08:00:00	44.04104683
02/02/2006 09:00:00	44.03551745
02/02/2006 10:00:00	44.03559953
02/02/2006 11:00:00	44.04035389
02/02/2006 12:00:00	44.04884132
02/02/2006 13:00:00	44.06012261
02/02/2006 14:00:00	44.07325857
02/02/2006 15:00:00	44.08730998
02/02/2006 16:00:00	44.10133765
02/02/2006 17:00:00	44.11440238
02/02/2006 18:00:00	44.12556495
02/02/2006 19:00:00	44.13388617
02/02/2006 20:00:00	44.13842683
02/02/2006 21:00:00	44.13824773
02/02/2006 22:00:00	44.13240967
02/02/2006 23:00:00	44.11997344
03/02/2006 00:00:00	44.09999985
03/02/2006 01:00:00	44.0718016
03/02/2006 02:00:00	44.03569909
03/02/2006 03:00:00	43.99226461
03/02/2006 04:00:00	43.94207047
03/02/2006 05:00:00	43.88568896
03/02/2006 06:00:00	43.82369239
03/02/2006 07:00:00	43.75665306
03/02/2006 08:00:00	43.68514326
03/02/2006 09:00:00	43.60973529
03/02/2006 10:00:00	43.53100145
03/02/2006 11:00:00	43.44951405
03/02/2006 12:00:00	43.36584538
03/02/2006 13:00:00	43.28056775
03/02/2006 14:00:00	43.19425344
03/02/2006 15:00:00	43.10747477
03/02/2006 16:00:00	43.02080403
03/02/2006 17:00:00	42.93481352
03/02/2006 18:00:00	42.85007554
03/02/2006 19:00:00	42.76716239
03/02/2006 20:00:00	42.68664637
03/02/2006 21:00:00	42.60909978
03/02/2006 22:00:00	42.53509492
03/02/2006 23:00:00	42.46520409
04/02/2006 00:00:00	42.39999959
04/02/2006 01:00:00	42.33992141
04/02/2006 02:00:00	42.28488033
04/02/2006 03:00:00	42.23465483
04/02/2006 04:00:00	42.18902338
04/02/2006 05:00:00	42.14776446
04/02/2006 06:00:00	42.11065655
04/02/2006 07:00:00	42.07747812
04/02/2006 08:00:00	42.04800765
04/02/2006 09:00:00	42.02202362
04/02/2006 10:00:00	41.99930451
04/02/2006 11:00:00	41.97962878
04/02/2006 12:00:00	41.96277493
04/02/2006 13:00:00	41.94852142
04/02/2006 14:00:00	41.93664674
04/02/2006 15:00:00	41.92692935
04/02/2006 16:00:00	41.91914774
04/02/2006 17:00:00	41.91308038
04/02/2006 18:00:00	41.90850575
04/02/2006 19:00:00	41.90520233
04/02/2006 20:00:00	41.90294859
04/02/2006 21:00:00	41.90152301
04/02/2006 22:00:00	41.90070406
04/02/2006 23:00:00	41.90027024
05/02/2006 00:00:00	41.9
05/02/2006 01:00:00	41.89965977
05/02/2006 02:00:00	41.89896777
05/02/2006 03:00:00	41.89763014
05/02/2006 04:00:00	41.89535304
05/02/2006 05:00:00	41.89184263
05/02/2006 06:00:00	41.88680505
05/02/2006 07:00:00	41.87994646
05/02/2006 08:00:00	41.87097302
05/02/2006 09:00:00	41.85959088
05/02/2006 10:00:00	41.84550619
05/02/2006 11:00:00	41.82842511
05/02/2006 12:00:00	41.80805379
05/02/2006 13:00:00	41.78409838
05/02/2006 14:00:00	41.75626505
05/02/2006 15:00:00	41.72425994
05/02/2006 16:00:00	41.6877892
05/02/2006 17:00:00	41.646559
05/02/2006 18:00:00	41.60027548
05/02/2006 19:00:00	41.5486448
05/02/2006 20:00:00	41.49137312
05/02/2006 21:00:00	41.42816658
05/02/2006 22:00:00	41.35873135
05/02/2006 23:00:00	41.28277357
06/02/2006 00:00:00	41.1999994
06/02/2006 01:00:00	41.1103968
06/02/2006 02:00:00	41.01508087
06/02/2006 03:00:00	40.91544854
06/02/2006 04:00:00	40.8128967
06/02/2006 05:00:00	40.70882227
06/02/2006 06:00:00	40.60462214
06/02/2006 07:00:00	40.50169324
06/02/2006 08:00:00	40.40143246
06/02/2006 09:00:00	40.30523671
06/02/2006 10:00:00	40.21450289
06/02/2006 11:00:00	40.13062793
06/02/2006 12:00:00	40.05500872
06/02/2006 13:00:00	39.98904216
06/02/2006 14:00:00	39.93412518
06/02/2006 15:00:00	39.89165467
06/02/2006 16:00:00	39.86302753
06/02/2006 17:00:00	39.84964069
06/02/2006 18:00:00	39.85289104
06/02/2006 19:00:00	39.87417549
06/02/2006 20:00:00	39.91489096
06/02/2006 21:00:00	39.97643433
06/02/2006 22:00:00	40.06020253
06/02/2006 23:00:00	40.16759247
07/02/2006 00:00:00	40.30000103
07/02/2006 01:00:00	40.45852021
07/02/2006 02:00:00	40.64302224
07/02/2006 03:00:00	40.85307447
07/02/2006 04:00:00	41.08824421
07/02/2006 05:00:00	41.3480988
07/02/2006 06:00:00	41.63220557
07/02/2006 07:00:00	41.94013184
07/02/2006 08:00:00	42.27144495
07/02/2006 09:00:00	42.62571222
07/02/2006 10:00:00	43.00250098
07/02/2006 11:00:00	43.40137857
07/02/2006 12:00:00	43.82191231
07/02/2006 13:00:00	44.26366953
07/02/2006 14:00:00	44.72621756
07/02/2006 15:00:00	45.20912372
07/02/2006 16:00:00	45.71195536
07/02/2006 17:00:00	46.23427979
07/02/2006 18:00:00	46.77566435
07/02/2006 19:00:00	47.33567636
07/02/2006 20:00:00	47.91388316
07/02/2006 21:00:00	48.50985207
07/02/2006 22:00:00	49.12315042
07/02/2006 23:00:00	49.75334555
08/02/2006 00:00:00	50.40000478
08/02/2006 01:00:00	51.06239637
08/02/2006 02:00:00	51.7385924
08/02/2006 03:00:00	52.42636587
08/02/2006 04:00:00	53.12348979
08/02/2006 05:00:00	53.82773719
08/02/2006 06:00:00	54.53688106
08/02/2006 07:00:00	55.24869442
08/02/2006 08:00:00	55.96095028
08/02/2006 09:00:00	56.67142167
08/02/2006 10:00:00	57.37788158
08/02/2006 11:00:00	58.07810304
08/02/2006 12:00:00	58.76985905
08/02/2006 13:00:00	59.45092262
08/02/2006 14:00:00	60.11906678
08/02/2006 15:00:00	60.77206453
08/02/2006 16:00:00	61.40768888
08/02/2006 17:00:00	62.02371285
08/02/2006 18:00:00	62.61790946
08/02/2006 19:00:00	63.1880517
08/02/2006 20:00:00	63.7319126
08/02/2006 21:00:00	64.24726516
08/02/2006 22:00:00	64.7318824
08/02/2006 23:00:00	65.18353734
09/02/2006 00:00:00	65.60000298
09/02/2006 01:00:00	65.97952629
09/02/2006 02:00:00	66.32225
09/02/2006 03:00:00	66.62879078
09/02/2006 04:00:00	66.89976528
09/02/2006 05:00:00	67.13579016
09/02/2006 06:00:00	67.3374821
09/02/2006 07:00:00	67.50545775
09/02/2006 08:00:00	67.64033378
09/02/2006 09:00:00	67.74272684
09/02/2006 10:00:00	67.8132536
09/02/2006 11:00:00	67.85253072
09/02/2006 12:00:00	67.86117486
09/02/2006 13:00:00	67.8398027
09/02/2006 14:00:00	67.78903087
09/02/2006 15:00:00	67.70947606
09/02/2006 16:00:00	67.60175493
09/02/2006 17:00:00	67.46648413
09/02/2006 18:00:00	67.30428032
09/02/2006 19:00:00	67.11576018
09/02/2006 20:00:00	66.90154035
09/02/2006 21:00:00	66.66223751
09/02/2006 22:00:00	66.39846832
09/02/2006 23:00:00	66.11084944
10/02/2006 00:00:00	65.79999753
10/02/2006 01:00:00	65.46744268
10/02/2006 02:00:00	65.11836866
10/02/2006 03:00:00	64.75887259
10/02/2006 04:00:00	64.39505164
10/02/2006 05:00:00	64.03300294
10/02/2006 06:00:00	63.67882363
10/02/2006 07:00:00	63.33861087
10/02/2006 08:00:00	63.01846178
10/02/2006 09:00:00	62.72447353
10/02/2006 10:00:00	62.46274325
10/02/2006 11:00:00	62.23936808
10/02/2006 12:00:00	62.06044517
10/02/2006 13:00:00	61.93207167
10/02/2006 14:00:00	61.86034472
10/02/2006 15:00:00	61.85136145
10/02/2006 16:00:00	61.91121903
10/02/2006 17:00:00	62.04601458
10/02/2006 18:00:00	62.26184526
10/02/2006 19:00:00	62.56480821
10/02/2006 20:00:00	62.96100057
10/02/2006 21:00:00	63.45651948
10/02/2006 22:00:00	64.0574621
10/02/2006 23:00:00	64.76992556
11/02/2006 00:00:00	65.60000701
11/02/2006 01:00:00	66.55066696
11/02/2006 02:00:00	67.61231963
11/02/2006 03:00:00	68.77224279
11/02/2006 04:00:00	70.01771417
11/02/2006 05:00:00	71.33601153
11/02/2006 06:00:00	72.71441262
11/02/2006 07:00:00	74.14019517
11/02/2006 08:00:00	75.60063695
11/02/2006 09:00:00	77.08301569
11/02/2006 10:00:00	78.57460915
11/02/2006 11:00:00	80.06269508
11/02/2006 12:00:00	81.53455121
11/02/2006 13:00:00	82.97745531
11/02/2006 14:00:00	84.37868511
11/02/2006 15:00:00	85.72551837
11/02/2006 16:00:00	87.00523283
11/02/2006 17:00:00	88.20510624
11/02/2006 18:00:00	89.31241635
11/02/2006 19:00:00	90.31444091
11/02/2006 20:00:00	91.19845766
11/02/2006 21:00:00	91.95174436
11/02/2006 22:00:00	92.56157874
11/02/2006 23:00:00	93.01523857
12/02/2006 00:00:00	93.30000158
12/02/2006 01:00:00	93.40706725
12/02/2006 02:00:00	93.34332152
12/02/2006 03:00:00	93.1195719
12/02/2006 04:00:00	92.74662587
12/02/2006 05:00:00	92.23529092
12/02/2006 06:00:00	91.59637453
12/02/2006 07:00:00	90.8406842
12/02/2006 08:00:00	89.97902741
12/02/2006 09:00:00	89.02221165
12/02/2006 10:00:00	87.98104442
12/02/2006 11:00:00	86.86633319
12/02/2006 12:00:00	85.68888546
12/02/2006 13:00:00	84.45950872
12/02/2006 14:00:00	83.18901045
12/02/2006 15:00:00	81.88819814
12/02/2006 16:00:00	80.56787929
12/02/2006 17:00:00	79.23886137
12/02/2006 18:00:00	77.91195189
12/02/2006 19:00:00	76.59795832
12/02/2006 20:00:00	75.30768816
12/02/2006 21:00:00	74.05194889
12/02/2006 22:00:00	72.841548
12/02/2006 23:00:00	71.68729299
13/02/2006 00:00:00	70.59999133
13/02/2006 01:00:00	69.58820146
13/02/2006 02:00:00	68.65148581
13/02/2006 03:00:00	67.78715786
13/02/2006 04:00:00	66.99253108
13/02/2006 05:00:00	66.26491895
13/02/2006 06:00:00	65.60163496
13/02/2006 07:00:00	64.99999258
13/02/2006 08:00:00	64.45730529
13/02/2006 09:00:00	63.97088658
13/02/2006 10:00:00	63.53804991
13/02/2006 11:00:00	63.15610878
13/02/2006 12:00:00	62.82237665
13/02/2006 13:00:00	62.53416701
13/02/2006 14:00:00	62.28879334
13/02/2006 15:00:00	62.08356912
13/02/2006 16:00:00	61.91580783
13/02/2006 17:00:00	61.78282294
13/02/2006 18:00:00	61.68192793
13/02/2006 19:00:00	61.6104363
13/02/2006 20:00:00	61.5656615
13/02/2006 21:00:00	61.54491703
13/02/2006 22:00:00	61.54551637
13/02/2006 23:00:00	61.56477298
14/02/2006 00:00:00	61.60000036
14/02/2006 01:00:00	61.64884823
14/02/2006 02:00:00	61.71031132
14/02/2006 03:00:00	61.78372057
14/02/2006 04:00:00	61.86840695
14/02/2006 05:00:00	61.96370141
14/02/2006 06:00:00	62.0689349
14/02/2006 07:00:00	62.18343838
14/02/2006 08:00:00	62.3065428
14/02/2006 09:00:00	62.43757913
14/02/2006 10:00:00	62.57587831
14/02/2006 11:00:00	62.72077129
14/02/2006 12:00:00	62.87158905
14/02/2006 13:00:00	63.02766252
14/02/2006 14:00:00	63.18832267
14/02/2006 15:00:00	63.35290045
14/02/2006 16:00:00	63.52072682
14/02/2006 17:00:00	63.69113273
14/02/2006 18:00:00	63.86344913
14/02/2006 19:00:00	64.03700698
14/02/2006 20:00:00	64.21113724
14/02/2006 21:00:00	64.38517087
14/02/2006 22:00:00	64.55843881
14/02/2006 23:00:00	64.73027202
15/02/2006 00:00:00	64.90000146
15/02/2006 01:00:00	65.06810084
15/02/2006 02:00:00	65.23961482
15/02/2006 03:00:00	65.42073074
15/02/2006 04:00:00	65.61763597
15/02/2006 05:00:00	65.83651784
15/02/2006 06:00:00	66.08356373
15/02/2006 07:00:00	66.36496097
15/02/2006 08:00:00	66.68689692
15/02/2006 09:00:00	67.05555893
15/02/2006 10:00:00	67.47713436
15/02/2006 11:00:00	67.95781056
15/02/2006 12:00:00	68.50377489
15/02/2006 13:00:00	69.12121468
15/02/2006 14:00:00	69.8163173
15/02/2006 15:00:00	70.59527011
15/02/2006 16:00:00	71.46426044
15/02/2006 17:00:00	72.42947567
15/02/2006 18:00:00	73.49710313
15/02/2006 19:00:00	74.67333018
15/02/2006 20:00:00	75.96434417
15/02/2006 21:00:00	77.37633246
15/02/2006 22:00:00	78.9154824
15/02/2006 23:00:00	80.58798134
16/02/2006 00:00:00	82.40001664
16/02/2006 01:00:00	84.35474917
16/02/2006 02:00:00	86.44323426
16/02/2006 03:00:00	88.65350091
16/02/2006 04:00:00	90.97357814
16/02/2006 05:00:00	93.39149495
16/02/2006 06:00:00	95.89528036
16/02/2006 07:00:00	98.47296337
16/02/2006 08:00:00	101.112573
16/02/2006 09:00:00	103.8021382
16/02/2006 10:00:00	106.5296881
16/02/2006 11:00:00	109.2832516
16/02/2006 12:00:00	112.0508578
16/02/2006 13:00:00	114.8205356
16/02/2006 14:00:00	117.580314
16/02/2006 15:00:00	120.3182222
16/02/2006 16:00:00	123.022289
16/02/2006 17:00:00	125.6805436
16/02/2006 18:00:00	128.2810148
16/02/2006 19:00:00	130.8117317
16/02/2006 20:00:00	133.2607234
16/02/2006 21:00:00	135.6160188
16/02/2006 22:00:00	137.8656469
16/02/2006 23:00:00	139.9976368
17/02/2006 00:00:00	142.0000174
17/02/2006 01:00:00	143.8632738
17/02/2006 02:00:00	145.5877144
17/02/2006 03:00:00	147.1761035
17/02/2006 04:00:00	148.6312055
17/02/2006 05:00:00	149.9557846
17/02/2006 06:00:00	151.1526052
17/02/2006 07:00:00	152.2244317
17/02/2006 08:00:00	153.1740282
17/02/2006 09:00:00	154.0041592
17/02/2006 10:00:00	154.717589
17/02/2006 11:00:00	155.3170818
17/02/2006 12:00:00	155.8054021
17/02/2006 13:00:00	156.185314
17/02/2006 14:00:00	156.459582
17/02/2006 15:00:00	156.6309704
17/02/2006 16:00:00	156.7022434
17/02/2006 17:00:00	156.6761654
17/02/2006 18:00:00	156.5555007
17/02/2006 19:00:00	156.3430137
17/02/2006 20:00:00	156.0414685
17/02/2006 21:00:00	155.6536297
17/02/2006 22:00:00	155.1822614
17/02/2006 23:00:00	154.630128
18/02/2006 00:00:00	153.9999938
18/02/2006 01:00:00	153.2945752
18/02/2006 02:00:00	152.5163963
18/02/2006 03:00:00	151.6679333
18/02/2006 04:00:00	150.7516626
18/02/2006 05:00:00	149.7700602
18/02/2006 06:00:00	148.7256025
18/02/2006 07:00:00	147.6207656
18/02/2006 08:00:00	146.4580258
18/02/2006 09:00:00	145.2398593
18/02/2006 10:00:00	143.9687422
18/02/2006 11:00:00	142.6471509
18/02/2006 12:00:00	141.2775615
18/02/2006 13:00:00	139.8624503
18/02/2006 14:00:00	138.4042934
18/02/2006 15:00:00	136.9055671
18/02/2006 16:00:00	135.3687477
18/02/2006 17:00:00	133.7963112
18/02/2006 18:00:00	132.1907341
18/02/2006 19:00:00	130.5544923
18/02/2006 20:00:00	128.8900623
18/02/2006 21:00:00	127.1999202
18/02/2006 22:00:00	125.4865422
18/02/2006 23:00:00	123.7524045
19/02/2006 00:00:00	121.9999834
19/02/2006 01:00:00	120.2318495
19/02/2006 02:00:00	118.450951
19/02/2006 03:00:00	116.6603305
19/02/2006 04:00:00	114.8630306
19/02/2006 05:00:00	113.062094
19/02/2006 06:00:00	111.2605632
19/02/2006 07:00:00	109.4614808
19/02/2006 08:00:00	107.6678896
19/02/2006 09:00:00	105.882832
19/02/2006 10:00:00	104.1093507
19/02/2006 11:00:00	102.3504884
19/02/2006 12:00:00	100.6092876
19/02/2006 13:00:00	98.88879088
19/02/2006 14:00:00	97.19204095
19/02/2006 15:00:00	95.52208038
19/02/2006 16:00:00	93.88195179
19/02/2006 17:00:00	92.2746978
19/02/2006 18:00:00	90.703361
19/02/2006 19:00:00	89.17098403
19/02/2006 20:00:00	87.68060948
19/02/2006 21:00:00	86.23527998
19/02/2006 22:00:00	84.83803814
19/02/2006 23:00:00	83.49192656
20/02/2006 00:00:00	82.19998787
20/02/2006 01:00:00	80.96437083
20/02/2006 02:00:00	79.78364895
20/02/2006 03:00:00	78.65550195
20/02/2006 04:00:00	77.57760955
20/02/2006 05:00:00	76.54765147
20/02/2006 06:00:00	75.56330743
20/02/2006 07:00:00	74.62225715
20/02/2006 08:00:00	73.72218034
20/02/2006 09:00:00	72.86075672
20/02/2006 10:00:00	72.03566602
20/02/2006 11:00:00	71.24458794
20/02/2006 12:00:00	70.48520222
20/02/2006 13:00:00	69.75518857
20/02/2006 14:00:00	69.0522267
20/02/2006 15:00:00	68.37399635
20/02/2006 16:00:00	67.71817721
20/02/2006 17:00:00	67.08244902
20/02/2006 18:00:00	66.4644915
20/02/2006 19:00:00	65.86198436
20/02/2006 20:00:00	65.27260731
20/02/2006 21:00:00	64.69404009
20/02/2006 22:00:00	64.12396241
20/02/2006 23:00:00	63.56005398
21/02/2006 00:00:00	62.99999453
21/02/2006 01:00:00	62.44203666
21/02/2006 02:00:00	61.88672451
21/02/2006 03:00:00	61.33517506
21/02/2006 04:00:00	60.78850529
21/02/2006 05:00:00	60.24783218
21/02/2006 06:00:00	59.71427272
21/02/2006 07:00:00	59.18894389
21/02/2006 08:00:00	58.67296268
21/02/2006 09:00:00	58.16744607
21/02/2006 10:00:00	57.67351104
21/02/2006 11:00:00	57.19227458
21/02/2006 12:00:00	56.72485367
21/02/2006 13:00:00	56.2723653
21/02/2006 14:00:00	55.83592645
21/02/2006 15:00:00	55.4166541
21/02/2006 16:00:00	55.01566524
21/02/2006 17:00:00	54.63407685
21/02/2006 18:00:00	54.27300592
21/02/2006 19:00:00	53.93356943
21/02/2006 20:00:00	53.61688436
21/02/2006 21:00:00	53.3240677
21/02/2006 22:00:00	53.05623643
21/02/2006 23:00:00	52.81450753
22/02/2006 00:00:00	52.599998
22/02/2006 01:00:00	52.41316494
22/02/2006 02:00:00	52.25182609
22/02/2006 03:00:00	52.11313934
22/02/2006 04:00:00	51.9942626
22/02/2006 05:00:00	51.89235377
22/02/2006 06:00:00	51.80457074
22/02/2006 07:00:00	51.72807143
22/02/2006 08:00:00	51.66001372
22/02/2006 09:00:00	51.59755553
22/02/2006 10:00:00	51.53785475
22/02/2006 11:00:00	51.47806928
22/02/2006 12:00:00	51.41535703
22/02/2006 13:00:00	51.34687588
22/02/2006 14:00:00	51.26978376
22/02/2006 15:00:00	51.18123855
22/02/2006 16:00:00	51.07839816
22/02/2006 17:00:00	50.95842049
22/02/2006 18:00:00	50.81846343
22/02/2006 19:00:00	50.6556849
22/02/2006 20:00:00	50.46724278
22/02/2006 21:00:00	50.25029499
22/02/2006 22:00:00	50.00199942
22/02/2006 23:00:00	49.71951397
23/02/2006 00:00:00	49.39999655
23/02/2006 01:00:00	49.04213631
23/02/2006 02:00:00	48.65074725
23/02/2006 03:00:00	48.23217453
23/02/2006 04:00:00	47.79276332
23/02/2006 05:00:00	47.33885878
23/02/2006 06:00:00	46.87680607
23/02/2006 07:00:00	46.41295035
23/02/2006 08:00:00	45.95363679
23/02/2006 09:00:00	45.50521055
23/02/2006 10:00:00	45.07401678
23/02/2006 11:00:00	44.66640066
23/02/2006 12:00:00	44.28870735
23/02/2006 13:00:00	43.947282
23/02/2006 14:00:00	43.64846978
23/02/2006 15:00:00	43.39861586
23/02/2006 16:00:00	43.20406539
23/02/2006 17:00:00	43.07116354
23/02/2006 18:00:00	43.00625547
23/02/2006 19:00:00	43.01568634
23/02/2006 20:00:00	43.10580131
23/02/2006 21:00:00	43.28294555
23/02/2006 22:00:00	43.55346423
23/02/2006 23:00:00	43.92370249
24/02/2006 00:00:00	44.40000551
24/02/2006 01:00:00	44.98577796
24/02/2006 02:00:00	45.67266291
24/02/2006 03:00:00	46.44936313
24/02/2006 04:00:00	47.30458139
24/02/2006 05:00:00	48.22702046
24/02/2006 06:00:00	49.20538312
24/02/2006 07:00:00	50.22837212
24/02/2006 08:00:00	51.28469024
24/02/2006 09:00:00	52.36304024
24/02/2006 10:00:00	53.45212491
24/02/2006 11:00:00	54.54064699
24/02/2006 12:00:00	55.61730927
24/02/2006 13:00:00	56.67081452
24/02/2006 14:00:00	57.6898655
24/02/2006 15:00:00	58.66316497
24/02/2006 16:00:00	59.57941572
24/02/2006 17:00:00	60.42732051
24/02/2006 18:00:00	61.19558211
24/02/2006 19:00:00	61.87290328
24/02/2006 20:00:00	62.44798681
24/02/2006 21:00:00	62.90953544
24/02/2006 22:00:00	63.24625197
24/02/2006 23:00:00	63.44683914
25/02/2006 00:00:00	63.49999974
25/02/2006 01:00:00	63.39798301
25/02/2006 02:00:00	63.1472236
25/02/2006 03:00:00	62.75770243
25/02/2006 04:00:00	62.23940043
25/02/2006 05:00:00	61.60229849
25/02/2006 06:00:00	60.85637754
25/02/2006 07:00:00	60.01161848
25/02/2006 08:00:00	59.07800223
25/02/2006 09:00:00	58.06550971
25/02/2006 10:00:00	56.98412182
25/02/2006 11:00:00	55.84381949
25/02/2006 12:00:00	54.65458361
25/02/2006 13:00:00	53.42639512
25/02/2006 14:00:00	52.16923491
25/02/2006 15:00:00	50.8930839
25/02/2006 16:00:00	49.60792302
25/02/2006 17:00:00	48.32373316
25/02/2006 18:00:00	47.05049524
25/02/2006 19:00:00	45.79819018
25/02/2006 20:00:00	44.57679889
25/02/2006 21:00:00	43.39630228
25/02/2006 22:00:00	42.26668127
25/02/2006 23:00:00	41.19791677
26/02/2006 00:00:00	40.19998969
26/02/2006 01:00:00	39.28064915
26/02/2006 02:00:00	38.4387174
26/02/2006 03:00:00	37.67078502
26/02/2006 04:00:00	36.97344261
26/02/2006 05:00:00	36.34328077
26/02/2006 06:00:00	35.77689007
26/02/2006 07:00:00	35.27086113
26/02/2006 08:00:00	34.82178452
26/02/2006 09:00:00	34.42625084
26/02/2006 10:00:00	34.08085068
26/02/2006 11:00:00	33.78217463
26/02/2006 12:00:00	33.5268133
26/02/2006 13:00:00	33.31135726
26/02/2006 14:00:00	33.13239711
26/02/2006 15:00:00	32.98652345
26/02/2006 16:00:00	32.87032687
26/02/2006 17:00:00	32.78039795
26/02/2006 18:00:00	32.71332729
26/02/2006 19:00:00	32.66570549
26/02/2006 20:00:00	32.63412313
26/02/2006 21:00:00	32.6151708
26/02/2006 22:00:00	32.60543911
26/02/2006 23:00:00	32.60151864
27/02/2006 00:00:00	32.59999998
27/02/2006 01:00:00	32.59803657
27/02/2006 02:00:00	32.59503308
27/02/2006 03:00:00	32.59095699
27/02/2006 04:00:00	32.58577579
27/02/2006 05:00:00	32.57945696
27/02/2006 06:00:00	32.57196798
27/02/2006 07:00:00	32.56327634
27/02/2006 08:00:00	32.5533495
27/02/2006 09:00:00	32.54215497
27/02/2006 10:00:00	32.5296602
27/02/2006 11:00:00	32.5158327
27/02/2006 12:00:00	32.50063993
27/02/2006 13:00:00	32.48404939
27/02/2006 14:00:00	32.46602854
27/02/2006 15:00:00	32.44654488
27/02/2006 16:00:00	32.42556589
27/02/2006 17:00:00	32.40305904
27/02/2006 18:00:00	32.37899181
27/02/2006 19:00:00	32.3533317
27/02/2006 20:00:00	32.32604618
27/02/2006 21:00:00	32.29710272
27/02/2006 22:00:00	32.26646882
27/02/2006 23:00:00	32.23411196
28/02/2006 00:00:00	32.19999961
28/02/2006 01:00:00	32.16414483
28/02/2006 02:00:00	32.12674291
28/02/2006 03:00:00	32.08803474
28/02/2006 04:00:00	32.04826118
28/02/2006 05:00:00	32.00766311
28/02/2006 06:00:00	31.96648139
28/02/2006 07:00:00	31.92495689
28/02/2006 08:00:00	31.88333049
28/02/2006 09:00:00	31.84184306
28/02/2006 10:00:00	31.80073547
28/02/2006 11:00:00	31.76024859
28/02/2006 12:00:00	31.72062328
28/02/2006 13:00:00	31.68210043
28/02/2006 14:00:00	31.6449209
28/02/2006 15:00:00	31.60932556
28/02/2006 16:00:00	31.57555529
28/02/2006 17:00:00	31.54385095
28/02/2006 18:00:00	31.51445342
28/02/2006 19:00:00	31.48760356
28/02/2006 20:00:00	31.46354225
28/02/2006 21:00:00	31.44251036
28/02/2006 22:00:00	31.42474876
28/02/2006 23:00:00	31.41049832
01/03/2006 00:00:00	31.3999999
01/03/2006 01:00:00	31.39340759
01/03/2006 02:00:00	31.39052825
01/03/2006 03:00:00	31.39108196
01/03/2006 04:00:00	31.3947888
01/03/2006 05:00:00	31.40136883
01/03/2006 06:00:00	31.41054215
01/03/2006 07:00:00	31.42202883
01/03/2006 08:00:00	31.43554893
01/03/2006 09:00:00	31.45082255
01/03/2006 10:00:00	31.46756975
01/03/2006 11:00:00	31.48551061
01/03/2006 12:00:00	31.50436522
01/03/2006 13:00:00	31.52385364
01/03/2006 14:00:00	31.54369595
01/03/2006 15:00:00	31.56361224
01/03/2006 16:00:00	31.58332257
01/03/2006 17:00:00	31.60254702
01/03/2006 18:00:00	31.62100567
01/03/2006 19:00:00	31.6384186
01/03/2006 20:00:00	31.65450588
01/03/2006 21:00:00	31.66898759
01/03/2006 22:00:00	31.68158381
01/03/2006 23:00:00	31.69201461
02/03/2006 00:00:00	31.70000008
02/03/2006 01:00:00	31.7053666
02/03/2006 02:00:00	31.70836585
02/03/2006 03:00:00	31.70935583
02/03/2006 04:00:00	31.70869452
02/03/2006 05:00:00	31.7067399
02/03/2006 06:00:00	31.70384998
02/03/2006 07:00:00	31.70038273
02/03/2006 08:00:00	31.69669615
02/03/2006 09:00:00	31.69314823
02/03/2006 10:00:00	31.69009695
02/03/2006 11:00:00	31.6879003
02/03/2006 12:00:00	31.68691628
02/03/2006 13:00:00	31.68750287
02/03/2006 14:00:00	31.69001805
02/03/2006 15:00:00	31.69481983
02/03/2006 16:00:00	31.70226619
02/03/2006 17:00:00	31.71271511
02/03/2006 18:00:00	31.72652459
02/03/2006 19:00:00	31.74405261
02/03/2006 20:00:00	31.76565717
02/03/2006 21:00:00	31.79169625
02/03/2006 22:00:00	31.82252784
02/03/2006 23:00:00	31.85850994
03/03/2006 00:00:00	31.90000052
03/03/2006 01:00:00	31.94707697
03/03/2006 02:00:00	31.99869423
03/03/2006 03:00:00	32.05352666
03/03/2006 04:00:00	32.11024862
03/03/2006 05:00:00	32.16753447
03/03/2006 06:00:00	32.22405856
03/03/2006 07:00:00	32.27849524
03/03/2006 08:00:00	32.32951888
03/03/2006 09:00:00	32.37580383
03/03/2006 10:00:00	32.41602445
03/03/2006 11:00:00	32.44885509
03/03/2006 12:00:00	32.47297011
03/03/2006 13:00:00	32.48704386
03/03/2006 14:00:00	32.48975071
03/03/2006 15:00:00	32.479765
03/03/2006 16:00:00	32.4557611
03/03/2006 17:00:00	32.41641337
03/03/2006 18:00:00	32.36039615
03/03/2006 19:00:00	32.2863838
03/03/2006 20:00:00	32.19305068
03/03/2006 21:00:00	32.07907116
03/03/2006 22:00:00	31.94311957
03/03/2006 23:00:00	31.78387029
04/03/2006 00:00:00	31.59999766
04/03/2006 01:00:00	31.39140197
04/03/2006 02:00:00	31.16288704
04/03/2006 03:00:00	30.92048251
04/03/2006 04:00:00	30.67021806
04/03/2006 05:00:00	30.41812332
04/03/2006 06:00:00	30.17022795
04/03/2006 07:00:00	29.93256162
04/03/2006 08:00:00	29.71115397
04/03/2006 09:00:00	29.51203466
04/03/2006 10:00:00	29.34123335
04/03/2006 11:00:00	29.20477968
04/03/2006 12:00:00	29.10870332
04/03/2006 13:00:00	29.05903392
04/03/2006 14:00:00	29.06180113
04/03/2006 15:00:00	29.12303461
04/03/2006 16:00:00	29.24876401
04/03/2006 17:00:00	29.445019
04/03/2006 18:00:00	29.71782921
04/03/2006 19:00:00	30.07322432
04/03/2006 20:00:00	30.51723397
04/03/2006 21:00:00	31.05588781
04/03/2006 22:00:00	31.69521551
04/03/2006 23:00:00	32.44124672
05/03/2006 00:00:00	33.30001109
05/03/2006 01:00:00	34.2743403
05/03/2006 02:00:00	35.35427453
05/03/2006 03:00:00	36.52665623
05/03/2006 04:00:00	37.77832783
05/03/2006 05:00:00	39.09613179
05/03/2006 06:00:00	40.46691054
05/03/2006 07:00:00	41.87750652
05/03/2006 08:00:00	43.31476217
05/03/2006 09:00:00	44.76551993
05/03/2006 10:00:00	46.21662225
05/03/2006 11:00:00	47.65491156
05/03/2006 12:00:00	49.06723031
05/03/2006 13:00:00	50.44042093
05/03/2006 14:00:00	51.76132587
05/03/2006 15:00:00	53.01678757
05/03/2006 16:00:00	54.19364847
05/03/2006 17:00:00	55.27875101
05/03/2006 18:00:00	56.25893763
05/03/2006 19:00:00	57.12105077
05/03/2006 20:00:00	57.85193287
05/03/2006 21:00:00	58.43842638
05/03/2006 22:00:00	58.86737373
05/03/2006 23:00:00	59.12561737
06/03/2006 00:00:00	59.19999973
06/03/2006 01:00:00	59.08170245
06/03/2006 02:00:00	58.77926328
06/03/2006 03:00:00	58.30555884
06/03/2006 04:00:00	57.67346576
06/03/2006 05:00:00	56.89586065
06/03/2006 06:00:00	55.98562015
06/03/2006 07:00:00	54.95562086
06/03/2006 08:00:00	53.81873942
06/03/2006 09:00:00	52.58785244
06/03/2006 10:00:00	51.27583655
06/03/2006 11:00:00	49.89556838
06/03/2006 12:00:00	48.45992453
06/03/2006 13:00:00	46.98178165
06/03/2006 14:00:00	45.47401634
06/03/2006 15:00:00	43.94950523
06/03/2006 16:00:00	42.42112495
06/03/2006 17:00:00	40.90175211
06/03/2006 18:00:00	39.40426334
06/03/2006 19:00:00	37.94153526
06/03/2006 20:00:00	36.52644449
06/03/2006 21:00:00	35.17186766
06/03/2006 22:00:00	33.89068138
06/03/2006 23:00:00	32.69576229
07/03/2006 00:00:00	31.599987
07/03/2006 01:00:00	30.61318488
07/03/2006 02:00:00	29.73299673
07/03/2006 03:00:00	28.95401634
07/03/2006 04:00:00	28.27083748
07/03/2006 05:00:00	27.67805393
07/03/2006 06:00:00	27.17025947
07/03/2006 07:00:00	26.74204788
07/03/2006 08:00:00	26.38801293
07/03/2006 09:00:00	26.10274842
07/03/2006 10:00:00	25.8808481
07/03/2006 11:00:00	25.71690577
07/03/2006 12:00:00	25.6055152
07/03/2006 13:00:00	25.54127017
07/03/2006 14:00:00	25.51876446
07/03/2006 15:00:00	25.53259184
07/03/2006 16:00:00	25.5773461
07/03/2006 17:00:00	25.64762102
07/03/2006 18:00:00	25.73801036
07/03/2006 19:00:00	25.84310792
07/03/2006 20:00:00	25.95750747
07/03/2006 21:00:00	26.07580279
07/03/2006 22:00:00	26.19258765
07/03/2006 23:00:00	26.30245584
08/03/2006 00:00:00	26.40000114
08/03/2006 01:00:00	26.48085988
08/03/2006 02:00:00	26.54483855
08/03/2006 03:00:00	26.59278609
08/03/2006 04:00:00	26.62555147
08/03/2006 05:00:00	26.64398364
08/03/2006 06:00:00	26.64893156
08/03/2006 07:00:00	26.64124419
08/03/2006 08:00:00	26.62177048
08/03/2006 09:00:00	26.59135939
08/03/2006 10:00:00	26.55085988
08/03/2006 11:00:00	26.50112091
08/03/2006 12:00:00	26.44299144
08/03/2006 13:00:00	26.37732041
08/03/2006 14:00:00	26.3049568
08/03/2006 15:00:00	26.22674955
08/03/2006 16:00:00	26.14354763
08/03/2006 17:00:00	26.05619999
08/03/2006 18:00:00	25.96555559
08/03/2006 19:00:00	25.87246338
08/03/2006 20:00:00	25.77777233
08/03/2006 21:00:00	25.68233139
08/03/2006 22:00:00	25.58698952
08/03/2006 23:00:00	25.49259568
09/03/2006 00:00:00	25.39999882
09/03/2006 01:00:00	25.31011127
09/03/2006 02:00:00	25.22409881
09/03/2006 03:00:00	25.14319058
09/03/2006 04:00:00	25.06861572
09/03/2006 05:00:00	25.00160337
09/03/2006 06:00:00	24.94338268
09/03/2006 07:00:00	24.89518278
09/03/2006 08:00:00	24.85823282
09/03/2006 09:00:00	24.83376193
09/03/2006 10:00:00	24.82299927
09/03/2006 11:00:00	24.82717397
09/03/2006 12:00:00	24.84751517
09/03/2006 13:00:00	24.88525201
09/03/2006 14:00:00	24.94161364
09/03/2006 15:00:00	25.0178292
09/03/2006 16:00:00	25.11512782
09/03/2006 17:00:00	25.23473866
09/03/2006 18:00:00	25.37789084
09/03/2006 19:00:00	25.54581352
09/03/2006 20:00:00	25.73973583
09/03/2006 21:00:00	25.96088692
09/03/2006 22:00:00	26.21049593
09/03/2006 23:00:00	26.48979199
10/03/2006 00:00:00	26.80000426
10/03/2006 01:00:00	27.14149264
10/03/2006 02:00:00	27.51114028
10/03/2006 03:00:00	27.90496118
10/03/2006 04:00:00	28.31896932
10/03/2006 05:00:00	28.7491787
10/03/2006 06:00:00	29.19160331
10/03/2006 07:00:00	29.64225713
10/03/2006 08:00:00	30.09715417
10/03/2006 09:00:00	30.5523084
10/03/2006 10:00:00	31.00373382
10/03/2006 11:00:00	31.44744442
10/03/2006 12:00:00	31.87945419
10/03/2006 13:00:00	32.29577712
10/03/2006 14:00:00	32.6924272
10/03/2006 15:00:00	33.06541843
10/03/2006 16:00:00	33.41076479
10/03/2006 17:00:00	33.72448027
10/03/2006 18:00:00	34.00257887
10/03/2006 19:00:00	34.24107457
10/03/2006 20:00:00	34.43598137
10/03/2006 21:00:00	34.58331325
10/03/2006 22:00:00	34.67908421
10/03/2006 23:00:00	34.71930824
11/03/2006 00:00:00	34.69999933
11/03/2006 01:00:00	34.61855946
11/03/2006 02:00:00	34.47794239
11/03/2006 03:00:00	34.28248974
11/03/2006 04:00:00	34.03654314
11/03/2006 05:00:00	33.74444423
11/03/2006 06:00:00	33.41053463
11/03/2006 07:00:00	33.03915599
11/03/2006 08:00:00	32.63464993
11/03/2006 09:00:00	32.20135808
11/03/2006 10:00:00	31.74362208
11/03/2006 11:00:00	31.26578355
11/03/2006 12:00:00	30.77218414
11/03/2006 13:00:00	30.26716546
11/03/2006 14:00:00	29.75506916
11/03/2006 15:00:00	29.24023686
11/03/2006 16:00:00	28.7270102
11/03/2006 17:00:00	28.21973081
11/03/2006 18:00:00	27.72274032
11/03/2006 19:00:00	27.24038036
11/03/2006 20:00:00	26.77699256
11/03/2006 21:00:00	26.33691856
11/03/2006 22:00:00	25.92449998
11/03/2006 23:00:00	25.54407846
12/03/2006 00:00:00	25.19999564
12/03/2006 01:00:00	24.89552742
12/03/2006 02:00:00	24.62968705
12/03/2006 03:00:00	24.40042213
12/03/2006 04:00:00	24.20568027
12/03/2006 05:00:00	24.04340907
12/03/2006 06:00:00	23.91155615
12/03/2006 07:00:00	23.8080691
12/03/2006 08:00:00	23.73089555
12/03/2006 09:00:00	23.67798309
12/03/2006 10:00:00	23.64727934
12/03/2006 11:00:00	23.6367319
12/03/2006 12:00:00	23.64428838
12/03/2006 13:00:00	23.66789638
12/03/2006 14:00:00	23.70550351
12/03/2006 15:00:00	23.75505739
12/03/2006 16:00:00	23.81450561
12/03/2006 17:00:00	23.88179579
12/03/2006 18:00:00	23.95487553
12/03/2006 19:00:00	24.03169245
12/03/2006 20:00:00	24.11019414
12/03/2006 21:00:00	24.18832821
12/03/2006 22:00:00	24.26404228
12/03/2006 23:00:00	24.33528395
13/03/2006 00:00:00	24.40000083
13/03/2006 01:00:00	24.45655579
13/03/2006 02:00:00	24.50497272
13/03/2006 03:00:00	24.54569073
13/03/2006 04:00:00	24.57914896
13/03/2006 05:00:00	24.6057865
13/03/2006 06:00:00	24.62604249
13/03/2006 07:00:00	24.64035604
13/03/2006 08:00:00	24.64916628
13/03/2006 09:00:00	24.65291231
13/03/2006 10:00:00	24.65203327
13/03/2006 11:00:00	24.64696826
13/03/2006 12:00:00	24.63815641
13/03/2006 13:00:00	24.62603683
13/03/2006 14:00:00	24.61104865
13/03/2006 15:00:00	24.59363099
13/03/2006 16:00:00	24.57422295
13/03/2006 17:00:00	24.55326367
13/03/2006 18:00:00	24.53119226
13/03/2006 19:00:00	24.50844784
13/03/2006 20:00:00	24.48546953
13/03/2006 21:00:00	24.46269644
13/03/2006 22:00:00	24.4405677
13/03/2006 23:00:00	24.41952243
14/03/2006 00:00:00	24.39999974
14/03/2006 01:00:00	24.38233531
14/03/2006 02:00:00	24.36645107
14/03/2006 03:00:00	24.35216548
14/03/2006 04:00:00	24.33929706
14/03/2006 05:00:00	24.32766427
14/03/2006 06:00:00	24.31708561
14/03/2006 07:00:00	24.30737956
14/03/2006 08:00:00	24.29836461
14/03/2006 09:00:00	24.28985924
14/03/2006 10:00:00	24.28168195
14/03/2006 11:00:00	24.27365121
14/03/2006 12:00:00	24.26558552
14/03/2006 13:00:00	24.25730336
14/03/2006 14:00:00	24.24862322
14/03/2006 15:00:00	24.23936357
14/03/2006 16:00:00	24.22934292
14/03/2006 17:00:00	24.21837974
14/03/2006 18:00:00	24.20629253
14/03/2006 19:00:00	24.19289976
14/03/2006 20:00:00	24.17801993
14/03/2006 21:00:00	24.16147151
14/03/2006 22:00:00	24.14307301
14/03/2006 23:00:00	24.1226429
15/03/2006 00:00:00	24.09999967
15/03/2006 01:00:00	24.07501818
15/03/2006 02:00:00	24.04779879
15/03/2006 03:00:00	24.01849822
15/03/2006 04:00:00	23.98727321
15/03/2006 05:00:00	23.95428048
15/03/2006 06:00:00	23.91967675
15/03/2006 07:00:00	23.88361876
15/03/2006 08:00:00	23.84626324
15/03/2006 09:00:00	23.80776691
15/03/2006 10:00:00	23.76828649
15/03/2006 11:00:00	23.72797872
15/03/2006 12:00:00	23.68700032
15/03/2006 13:00:00	23.64550803
15/03/2006 14:00:00	23.60365856
15/03/2006 15:00:00	23.56160865
15/03/2006 16:00:00	23.51951502
15/03/2006 17:00:00	23.4775344
15/03/2006 18:00:00	23.43582352
15/03/2006 19:00:00	23.39453911
15/03/2006 20:00:00	23.35383789
15/03/2006 21:00:00	23.31387659
15/03/2006 22:00:00	23.27481194
15/03/2006 23:00:00	23.23680066
16/03/2006 00:00:00	23.19999949
16/03/2006 01:00:00	23.16455883
16/03/2006 02:00:00	23.13060384
16/03/2006 03:00:00	23.09825336
16/03/2006 04:00:00	23.06762623
16/03/2006 05:00:00	23.0388413
16/03/2006 06:00:00	23.01201739
16/03/2006 07:00:00	22.98727335
16/03/2006 08:00:00	22.96472801
16/03/2006 09:00:00	22.94450023
16/03/2006 10:00:00	22.92670884
16/03/2006 11:00:00	22.91147267
16/03/2006 12:00:00	22.89891058
16/03/2006 13:00:00	22.88914139
16/03/2006 14:00:00	22.88228395
16/03/2006 15:00:00	22.87845709
16/03/2006 16:00:00	22.87777967
16/03/2006 17:00:00	22.88037051
16/03/2006 18:00:00	22.88634846
16/03/2006 19:00:00	22.89583236
16/03/2006 20:00:00	22.90894104
16/03/2006 21:00:00	22.92579335
16/03/2006 22:00:00	22.94650813
16/03/2006 23:00:00	22.97120421
17/03/2006 00:00:00	23.00000044
17/03/2006 01:00:00	23.0328688
17/03/2006 02:00:00	23.06919383
17/03/2006 03:00:00	23.10821325
17/03/2006 04:00:00	23.14916475
17/03/2006 05:00:00	23.19128605
17/03/2006 06:00:00	23.23381485
17/03/2006 07:00:00	23.27598884
17/03/2006 08:00:00	23.31704575
17/03/2006 09:00:00	23.35622327
17/03/2006 10:00:00	23.3927591
17/03/2006 11:00:00	23.42589095
17/03/2006 12:00:00	23.45485654
17/03/2006 13:00:00	23.47889355
17/03/2006 14:00:00	23.4972397
17/03/2006 15:00:00	23.50913269
17/03/2006 16:00:00	23.51381022
17/03/2006 17:00:00	23.51051001
17/03/2006 18:00:00	23.49846975
17/03/2006 19:00:00	23.47692715
17/03/2006 20:00:00	23.44511992
17/03/2006 21:00:00	23.40228575
17/03/2006 22:00:00	23.34766236
17/03/2006 23:00:00	23.28048745
18/03/2006 00:00:00	23.19999872
18/03/2006 01:00:00	23.10625191
18/03/2006 02:00:00	23.00257467
18/03/2006 03:00:00	22.89311263
18/03/2006 04:00:00	22.78201141
18/03/2006 05:00:00	22.67341662
18/03/2006 06:00:00	22.57147389
18/03/2006 07:00:00	22.48032883
18/03/2006 08:00:00	22.40412706
18/03/2006 09:00:00	22.34701421
18/03/2006 10:00:00	22.31313588
18/03/2006 11:00:00	22.3066377
18/03/2006 12:00:00	22.33166528
18/03/2006 13:00:00	22.39236426
18/03/2006 14:00:00	22.49288023
18/03/2006 15:00:00	22.63735883
18/03/2006 16:00:00	22.82994567
18/03/2006 17:00:00	23.07478638
18/03/2006 18:00:00	23.37602656
18/03/2006 19:00:00	23.73781184
18/03/2006 20:00:00	24.16428783
18/03/2006 21:00:00	24.65960017
18/03/2006 22:00:00	25.22789445
18/03/2006 23:00:00	25.87331631
19/03/2006 00:00:00	26.60001136
19/03/2006 01:00:00	27.40973065
19/03/2006 02:00:00	28.29464731
19/03/2006 03:00:00	29.24454012
19/03/2006 04:00:00	30.24918787
19/03/2006 05:00:00	31.29836933
19/03/2006 06:00:00	32.38186329
19/03/2006 07:00:00	33.48944851
19/03/2006 08:00:00	34.61090378
19/03/2006 09:00:00	35.73600788
19/03/2006 10:00:00	36.85453959
19/03/2006 11:00:00	37.95627768
19/03/2006 12:00:00	39.03100093
19/03/2006 13:00:00	40.06848813
19/03/2006 14:00:00	41.05851804
19/03/2006 15:00:00	41.99086946
19/03/2006 16:00:00	42.85532115
19/03/2006 17:00:00	43.6416519
19/03/2006 18:00:00	44.33964048
19/03/2006 19:00:00	44.93906568
19/03/2006 20:00:00	45.42970627
19/03/2006 21:00:00	45.80134103
19/03/2006 22:00:00	46.04374874
19/03/2006 23:00:00	46.14670818
20/03/2006 00:00:00	46.09999813
20/03/2006 01:00:00	45.89694909
20/03/2006 02:00:00	45.54509789
20/03/2006 03:00:00	45.05553274
20/03/2006 04:00:00	44.43934186
20/03/2006 05:00:00	43.70761349
20/03/2006 06:00:00	42.87143584
20/03/2006 07:00:00	41.94189715
20/03/2006 08:00:00	40.93008563
20/03/2006 09:00:00	39.84708951
20/03/2006 10:00:00	38.70399702
20/03/2006 11:00:00	37.51189637
20/03/2006 12:00:00	36.2818758
20/03/2006 13:00:00	35.02502352
20/03/2006 14:00:00	33.75242777
20/03/2006 15:00:00	32.47517677
20/03/2006 16:00:00	31.20435873
20/03/2006 17:00:00	29.95106189
20/03/2006 18:00:00	28.72637447
20/03/2006 19:00:00	27.5413847
20/03/2006 20:00:00	26.40718079
20/03/2006 21:00:00	25.33485098
20/03/2006 22:00:00	24.33548348
20/03/2006 23:00:00	23.42016652
21/03/2006 00:00:00	22.59998834
21/03/2006 01:00:00	21.88325297
21/03/2006 02:00:00	21.26712828
21/03/2006 03:00:00	20.74599824
21/03/2006 04:00:00	20.31424678
21/03/2006 05:00:00	19.96625785
21/03/2006 06:00:00	19.69641541
21/03/2006 07:00:00	19.4991034
21/03/2006 08:00:00	19.36870578
21/03/2006 09:00:00	19.29960648
21/03/2006 10:00:00	19.28618947
21/03/2006 11:00:00	19.32283869
21/03/2006 12:00:00	19.40393809
21/03/2006 13:00:00	19.52387162
21/03/2006 14:00:00	19.67702323
21/03/2006 15:00:00	19.85777686
21/03/2006 16:00:00	20.06051648
21/03/2006 17:00:00	20.27962602
21/03/2006 18:00:00	20.50948943
21/03/2006 19:00:00	20.74449068
21/03/2006 20:00:00	20.9790137
21/03/2006 21:00:00	21.20744244
21/03/2006 22:00:00	21.42416085
21/03/2006 23:00:00	21.62355289
22/03/2006 00:00:00	21.80000251
22/03/2006 01:00:00	21.94908363
22/03/2006 02:00:00	22.07112993
22/03/2006 03:00:00	22.16766495
22/03/2006 04:00:00	22.24021225
22/03/2006 05:00:00	22.29029538
22/03/2006 06:00:00	22.31943786
22/03/2006 07:00:00	22.32916327
22/03/2006 08:00:00	22.32099514
22/03/2006 09:00:00	22.29645702
22/03/2006 10:00:00	22.25707246
22/03/2006 11:00:00	22.204365
22/03/2006 12:00:00	22.13985819
22/03/2006 13:00:00	22.06507559
22/03/2006 14:00:00	21.98154073
22/03/2006 15:00:00	21.89077717
22/03/2006 16:00:00	21.79430845
22/03/2006 17:00:00	21.69365812
22/03/2006 18:00:00	21.59034973
22/03/2006 19:00:00	21.48590682
22/03/2006 20:00:00	21.38185294
22/03/2006 21:00:00	21.27971164
22/03/2006 22:00:00	21.18100647
22/03/2006 23:00:00	21.08726098
23/03/2006 00:00:00	20.9999987
23/03/2006 01:00:00	20.92042403
23/03/2006 02:00:00	20.84846477
23/03/2006 03:00:00	20.78372958
23/03/2006 04:00:00	20.72582713
23/03/2006 05:00:00	20.67436608
23/03/2006 06:00:00	20.62895511
23/03/2006 07:00:00	20.58920288
23/03/2006 08:00:00	20.55471805
23/03/2006 09:00:00	20.52510929
23/03/2006 10:00:00	20.49998527
23/03/2006 11:00:00	20.47895466
23/03/2006 12:00:00	20.46162612
23/03/2006 13:00:00	20.44760832
23/03/2006 14:00:00	20.43650993
23/03/2006 15:00:00	20.4279396
23/03/2006 16:00:00	20.42150602
23/03/2006 17:00:00	20.41681784
23/03/2006 18:00:00	20.41348373
23/03/2006 19:00:00	20.41111236
23/03/2006 20:00:00	20.4093124
23/03/2006 21:00:00	20.40769251
23/03/2006 22:00:00	20.40586136
23/03/2006 23:00:00	20.40342761
24/03/2006 00:00:00	20.39999994
24/03/2006 01:00:00	20.39525196
24/03/2006 02:00:00	20.3891171
24/03/2006 03:00:00	20.38159376
24/03/2006 04:00:00	20.37268032
24/03/2006 05:00:00	20.36237515
24/03/2006 06:00:00	20.35067664
24/03/2006 07:00:00	20.33758317
24/03/2006 08:00:00	20.32309314
24/03/2006 09:00:00	20.30720491
24/03/2006 10:00:00	20.28991688
24/03/2006 11:00:00	20.27122742
24/03/2006 12:00:00	20.25113493
24/03/2006 13:00:00	20.22963778
24/03/2006 14:00:00	20.20673436
24/03/2006 15:00:00	20.18242304
24/03/2006 16:00:00	20.15670222
24/03/2006 17:00:00	20.12957028
24/03/2006 18:00:00	20.10102559
24/03/2006 19:00:00	20.07106655
24/03/2006 20:00:00	20.03969153
24/03/2006 21:00:00	20.00689893
24/03/2006 22:00:00	19.97268711
24/03/2006 23:00:00	19.93705448
25/03/2006 00:00:00	19.8999994
25/03/2006 01:00:00	19.86163747
25/03/2006 02:00:00	19.82255312
25/03/2006 03:00:00	19.78344797
25/03/2006 04:00:00	19.74502362
25/03/2006 05:00:00	19.70798171
25/03/2006 06:00:00	19.67302385
[truncated: 6,761 more rows]
