# Supplementary material for: Flood Prediction in Ungauged Basins by Physical-Based TOPKAPI Model
Source: Hindawi journal article supplement (doi:10.1155/2019/4795853), 2019-09-05
Supplement: f1 [file 4795853.f1.zip › 4795853.f1/xxdpre_2003.csv]

time	50220150	50220550	50220700	50220850	50221900	50222450	50223650	50223900	50224350	50224650	50224750	50225350	50227850
01/01/2003 00:00:00	0	0	0	0	0	0	0	0	0	0	0	0	0
01/01/2003 01:00:00	0	0	0	0	0	0	0	0	0	0	0	0	0
01/01/2003 02:00:00	0	0	0	0	0	0	0	0	0	0	0	0	0
01/01/2003 03:00:00	0	0	0	0	0	0	0	0	0	0	0	0	0
01/01/2003 04:00:00	0	0	0	0	0	0	0	0	0	0	0	0	0
01/01/2003 05:00:00	0	0	0	0	0	0	0	0	0	0	0	0	0
01/01/2003 06:00:00	0	0	0	0	0	0	0	0	0	0	0	0	0
01/01/2003 07:00:00	0	0	0	0	0	0	0	0	0	0	0	0	0
01/01/2003 08:00:00	0	0	0	0	0	0	0	0	0	0	0	0	0
01/01/2003 09:00:00	0	0	0	0	0	0	0	0	0	0	0	0	0
01/01/2003 10:00:00	0	0	0	0	0	0	0	0	0	0	0	0	0
01/01/2003 11:00:00	0	0	0	0	0	0	0	0	0	0	0	0	0
01/01/2003 12:00:00	0	0	0	0	0	0	0	0	0	0	0	0	0
01/01/2003 13:00:00	0	0	0	0	0	0	0	0	0	0	0	0	0
01/01/2003 14:00:00	0	0	0	0	0	0	0	0	0	0	0	0	0
01/01/2003 15:00:00	0	0	0	0	0	0	0	0	0	0	0	0	0
01/01/2003 16:00:00	0	0	0	0	0	0	0	0	0	0	0	0	0
01/01/2003 17:00:00	0	0	0	0	0	0	0	0	0	0	0	0	0
01/01/2003 18:00:00	0	0	0	0	0	0	0	0	0	0	0	0	0
01/01/2003 19:00:00	0	0	0	0	0	0	0	0	0	0	0	0	0
01/01/2003 20:00:00	0	0	0	0	0	0	0	0	0	0	0	0	0
01/01/2003 21:00:00	0	0	0	0	0	0	0	0	0	0	0	0	0
01/01/2003 22:00:00	0	0	0	0	0	0	0	0	0	0	0	0	0
01/01/2003 23:00:00	0	0	0	0	0	0	0	0	0	0	0	0	0
02/01/2003 00:00:00	0	0	0	0	0	0	0	0	0	0	0	0	0
02/01/2003 01:00:00	0	0	0	0	0	0	0	0	0	0	0	0	0
02/01/2003 02:00:00	0	0	0	0	0	0	0	0	0	0	0	0	0
02/01/2003 03:00:00	0	0	0	0	0	0	0	0	0	0	0	0	0
02/01/2003 04:00:00	0	0	0	0	0	0	0	0	0	0	0	0	0
02/01/2003 05:00:00	0	0	0	0	0	0	0	0	0	0	0	0	0
02/01/2003 06:00:00	0	0	0	0	0	0	0	0	0	0	0	0	0
02/01/2003 07:00:00	0	0	0	0	0	0	0	0	0	0	0	0	0
02/01/2003 08:00:00	0	0	0	0	0	0	0	0	0	0	0	0	0
02/01/2003 09:00:00	0	0	0	0	0	0	0	0	0	0	0	0	0
02/01/2003 10:00:00	0	0	0	0	0	0	0	0	0	0	0	0	0
02/01/2003 11:00:00	0	0	0	0	0	0	0	0	0	0	0	0	0
02/01/2003 12:00:00	0	0	0	0	0	0	0	0	0	0	0	0	0
02/01/2003 13:00:00	0	0	0	0	0	0	0	0	0	0	0	0	0
02/01/2003 14:00:00	0	0	0	0	0	0	0	0	0	0	0	0	0
02/01/2003 15:00:00	0	0	0	0	0	0	0	0	0	0	0	0	0
02/01/2003 16:00:00	0	0	0	0	0	0	0	0	0	0	0	0	0
02/01/2003 17:00:00	0	0	0	0	0	0	0	0	0	0	0	0	0
02/01/2003 18:00:00	0	0	0	0	0	0	0	0	0	0	0	0	0
02/01/2003 19:00:00	0	0	0	0	0	0	0	0	0	0	0	0	0
02/01/2003 20:00:00	0	0	0	0	0	0	0	0	0	0	0	0	0
02/01/2003 21:00:00	0	0	0	0	0	0	0	0	0	0	0	0	0
02/01/2003 22:00:00	0	0	0	0	0	0	0	0	0	0	0	0	0
02/01/2003 23:00:00	0	0	0	0	0	0	0	0	0	0	0	0	0
03/01/2003 00:00:00	0	0	0	0	0	0	0	0	0	0	0	0	0
03/01/2003 01:00:00	0	0	0	0	0	0	0	0	0	0	0	0	0
03/01/2003 02:00:00	0	0	0	0	0	0	0	0	0	0	0	0	0
03/01/2003 03:00:00	0	0	0	0	0	0	0	0	0	0	0	0	0
03/01/2003 04:00:00	0	0	0	0	0	0	0	0	0	0	0	0	0
03/01/2003 05:00:00	0	0	0	0	0	0	0	0	0	0	0	0	0
03/01/2003 06:00:00	0	0	0	0	0	0	0	0	0	0	0	0	0
03/01/2003 07:00:00	0	0	0	0	0	0	0	0	0	0	0	0	0
03/01/2003 08:00:00	0	0	0	0	0	0	0	0	0	0	0	0	0
03/01/2003 09:00:00	0	0	0	0	0	0	0	0	0	0	0	0	0
03/01/2003 10:00:00	0	0	0	0	0	0	0	0	0	0	0	0	0
03/01/2003 11:00:00	0	0	0	0	0	0	0	0	0	0	0	0	0
03/01/2003 12:00:00	0	0	0	0	0	0	0	0	0	0	0	0	0
03/01/2003 13:00:00	0	0	0	0	0	0	0	0	0	0	0	0	0
03/01/2003 14:00:00	0	0	0	0	0	0	0	0	0	0	0	0	0
03/01/2003 15:00:00	0	0	0	0	0	0	0	0	0	0	0	0	0
03/01/2003 16:00:00	0	0	0	0	0	0	0	0	0	0	0	0	0
03/01/2003 17:00:00	0	0	0	0	0	0	0	0	0	0	0	0	0
03/01/2003 18:00:00	0	0	0	0	0	0	0	0	0	0	0	0	0
03/01/2003 19:00:00	0	0	0	0	0	0	0	0	0	0	0	0	0
03/01/2003 20:00:00	0	0	0	0	0	0	0	0	0	0	0	0	0
03/01/2003 21:00:00	0	0	0	0	0	0	0	0	0	0	0	0	0
03/01/2003 22:00:00	0	0	0	0	0	0	0	0	0	0	0	0	0
03/01/2003 23:00:00	0	0	0	0	0	0	0	0	0	0	0	0	0
04/01/2003 00:00:00	0	0	0	0	0	0	0	0	0	0	0	0	0
04/01/2003 01:00:00	0	0	0	0	0	0	0	0	0	0	0	0	0
04/01/2003 02:00:00	0	0	0	0	0	0	0	0	0	0	0	0	0
04/01/2003 03:00:00	0	0	0	0	0	0	0	0	0	0	0	0	0
04/01/2003 04:00:00	0	0	0	0	0	0	0	0	0	0	0	0	0
04/01/2003 05:00:00	0	0	0	0	0	0	0	0	0	0	0	0	0
04/01/2003 06:00:00	0	0	0	0	0	0	0	0	0	0	0	0	0
04/01/2003 07:00:00	0	0	0	0	0	0	0	0	0	0	0	0	0
04/01/2003 08:00:00	0	0	0	0	0	0	0	0	0	0	0	0	0
04/01/2003 09:00:00	0	0	0	0	0	0	0	0	0	0	0	0	0
04/01/2003 10:00:00	0	0	0	0	0	0	0	0	0	0	0	0	0
04/01/2003 11:00:00	0	0	0	0	0	0	0	0	0	0	0	0	0
04/01/2003 12:00:00	0	0	0	0	0	0	0	0	0	0	0	0	0
04/01/2003 13:00:00	0	0	0	0	0	0	0	0	0	0	0	0	0
04/01/2003 14:00:00	0	0	0	0	0	0	0	0	0	0	0	0	0
04/01/2003 15:00:00	0	0	0	0	0	0	0	0	0	0	0	0	0
04/01/2003 16:00:00	0	0	0	0	0	0	0	0	0	0	0	0	0
04/01/2003 17:00:00	0	0	0	0	0	0	0	0	0	0	0	0	0
04/01/2003 18:00:00	0	0	0	0	0	0	0	0	0	0	0	0	0
04/01/2003 19:00:00	0	0	0	0	0	0	0	0	0	0	0	0	0
04/01/2003 20:00:00	0	0	0	0	0	0	0	0	0	0	0	0	0
04/01/2003 21:00:00	0	0	0	0	0	0	0	0	0	0	0	0	0
04/01/2003 22:00:00	0	0	0	0	0	0	0	0	0	0	0	0	0
04/01/2003 23:00:00	0	0	0	0	0	0	0	0	0	0	0	0	0
05/01/2003 00:00:00	0	0	0	0	0	0	0	0	0	0	0	0	0
05/01/2003 01:00:00	0	0	0	0	0	0	0	0	0	0	0	0	0
05/01/2003 02:00:00	0	0	0	0	0	0	0	0	0	0	0	0	0
05/01/2003 03:00:00	0	0	0	0	0	0	0	0	0	0	0	0	0
05/01/2003 04:00:00	0	0	0	0	0	0	0	0	0	0	0	0	0
05/01/2003 05:00:00	0	0	0	0	0	0	0	0	0	0	0	0	0
05/01/2003 06:00:00	0	0	0	0	0	0	0	0	0	0	0	0	0
05/01/2003 07:00:00	0	0	0	0	0	0	0	0	0	0	0	0	0
05/01/2003 08:00:00	0	0	0	0	0	0	0	0	0	0	0	0	0
05/01/2003 09:00:00	0	0	0	0	0	0	0	0	0	0	0	0	0
05/01/2003 10:00:00	0	0	0	0	0	0	0	0	0	0	0	0	0
05/01/2003 11:00:00	0	0	0	0	0	0	0	0	0	0	0	0	0
05/01/2003 12:00:00	0	0	0	0	0	0	0	0	0	0	0	0	0
05/01/2003 13:00:00	0	0	0	0	0	0	0	0	0	0	0	0	0
05/01/2003 14:00:00	0	0	0	0	0	0	0	0	0	0	0	0	0
05/01/2003 15:00:00	0	0	0	0	0	0	0	0	0	0	0	0	0
05/01/2003 16:00:00	0	0	0	0	0	0	0	0	0	0	0	0	0
05/01/2003 17:00:00	0	0	0	0	0	0	0	0	0	0	0	0	0
05/01/2003 18:00:00	0	0	0	0	0	0	0	0	0	0	0	0	0
05/01/2003 19:00:00	0	0	0	0	0	0	0	0	0	0	0	0	0
05/01/2003 20:00:00	0	0	0	0	0	0	0	0	0	0	0	0	0
05/01/2003 21:00:00	0	0	0	0	0	0	0	0	0	0	0	0	0
05/01/2003 22:00:00	0	0	0	0	0	0	0	0	0	0	0	0	0
05/01/2003 23:00:00	0	0	0	0	0	0	0	0	0	0	0	0	0
06/01/2003 00:00:00	0	0	0	0	0	0	0	0	0	0	0	0	0
06/01/2003 01:00:00	0	0	0	0	0	0	0	0	0	0	0	0	0
06/01/2003 02:00:00	0	0	0	0	0	0	0	0	0	0	0	0	0
06/01/2003 03:00:00	0	0	0	0	0	0	0	0	0	0	0	0	0
06/01/2003 04:00:00	0	0	0	0	0	0	0	0	0	0	0	0	0
06/01/2003 05:00:00	0	0	0	0	0	0	0	0	0	0	0	0	0
06/01/2003 06:00:00	0	0	0	0	0	0	0	0	0	0	0	0	0
06/01/2003 07:00:00	0	0	0	0	0	0	0	0	0	0	0	0	0
06/01/2003 08:00:00	0	0	0	0	0	0	0	0	0	0	0	0	0
06/01/2003 09:00:00	0	0	0	0	0	0	0	0	0	0	0	0	0
06/01/2003 10:00:00	0	0	0	0	0	0	0	0	0	0	0	0	0
06/01/2003 11:00:00	0	0	0	0	0	0	0	0	0	0	0	0	0
06/01/2003 12:00:00	0	0	0	0	0	0	0	0	0	0	0	0	0
06/01/2003 13:00:00	0	0	0	0	0	0	0	0	0	0	0	0	0
06/01/2003 14:00:00	0	0	0	0	0	0	0	0	0	0	0	0	0
06/01/2003 15:00:00	0	0	0	0	0	0	0	0	0	0	0	0	0
06/01/2003 16:00:00	0	0	0	0	0	0	0	0	0	0	0	0	0
06/01/2003 17:00:00	0	0	0	0	0	0	0	0	0	0	0	0	0
06/01/2003 18:00:00	0	0	0	0	0	0	0	0	0	0	0	0	0
06/01/2003 19:00:00	0	0	0	0	0	0	0	0	0	0	0	0	0
06/01/2003 20:00:00	0	0	0	0	0	0	0	0	0	0	0	0	0
06/01/2003 21:00:00	0	0	0	0	0	0	0	0	0	0	0	0	0
06/01/2003 22:00:00	0	0	0	0	0	0	0	0	0	0	0	0	0
06/01/2003 23:00:00	0	0	0	0	0	0	0	0	0	0	0	0	0
07/01/2003 00:00:00	0	0	0	0	0	0	0	0	0	0	0	0	0
07/01/2003 01:00:00	0	0	0	0	0	0	0	0	0	0	0	0	0
07/01/2003 02:00:00	0	0	0	0	0	0	0	0	0	0	0	0	0
07/01/2003 03:00:00	0	0	0	0	0	0	0	0	0	0	0	0	0
07/01/2003 04:00:00	0	0	0	0	0	0	0	0	0	0	0	0	0
07/01/2003 05:00:00	0	0	0	0	0	0	0	0	0	0	0	0	0
07/01/2003 06:00:00	0	0	0	0	0	0	0	0	0	0	0	0	0
07/01/2003 07:00:00	0	0	0	0	0	0	0	0	0	0	0	0	0
07/01/2003 08:00:00	0	0	0	0	0	0	0	0	0	0	0	0	0
07/01/2003 09:00:00	0	0	0	0	0	0	0	0	0	0	0	0	0
07/01/2003 10:00:00	0	0	0	0	0	0	0	0	0	0	0	0	0
07/01/2003 11:00:00	0	0	0	0	0	0	0	0	0	0	0	0	0
07/01/2003 12:00:00	0	0	0	0	0	0	0	0	0	0	0	0	0
07/01/2003 13:00:00	0	0	0	0	0	0	0	0	0	0	0	0	0
07/01/2003 14:00:00	0	0	0	0	0	0	0	0	0	0	0	0	0
07/01/2003 15:00:00	0	0	0	0	0	0	0	0	0	0	0	0	0
07/01/2003 16:00:00	0	0	0	0	0	0	0	0	0	0	0	0	0
07/01/2003 17:00:00	0	0	0	0	0	0	0	0	0	0	0	0	0
07/01/2003 18:00:00	0	0	0	0	0	0	0	0	0	0	0	0	0
07/01/2003 19:00:00	0	0	0	0	0	0	0	0	0	0	0	0	0
07/01/2003 20:00:00	0	0	0	0	0	0	0	0	0	0	0	0	0
07/01/2003 21:00:00	0	0	0	0	0	0	0	0	0	0	0	0	0
07/01/2003 22:00:00	0	0	0	0	0	0	0	0	0	0	0	0	0
07/01/2003 23:00:00	0	0	0	0	0	0	0	0	0	0	0	0	0
08/01/2003 00:00:00	0	0	0	0	0	0	0	0	0	0	0	0	0
08/01/2003 01:00:00	0	0	0	0	0	0	0	0	0	0	0	0	0
08/01/2003 02:00:00	0	0	0	0	0	0	0	0	0	0	0	0	0
08/01/2003 03:00:00	0	0	0	0	0	0	0	0	0	0	0	0	0
08/01/2003 04:00:00	0	0	0	0	0	0	0	0	0	0	0	0	0
08/01/2003 05:00:00	0	0	0	0	0	0	0	0	0	0	0	0	0
08/01/2003 06:00:00	0	0	0	0	0	0	0	0	0	0	0	0	0
08/01/2003 07:00:00	0	0	0	0	0	0	0	0	0	0	0	0	0
08/01/2003 08:00:00	0	0	0	0	0	0	0	0	0	0	0	0	0
08/01/2003 09:00:00	0	0	0	0	0	0	0	0	0	0	0	0	0
08/01/2003 10:00:00	0	0	0	0	0	0	0	0	0	0	0	0	0
08/01/2003 11:00:00	0	0	0	0	0	0	0	0	0	0	0	0	0
08/01/2003 12:00:00	0	0	0	0	0	0	0	0	0	0	0	0	0
08/01/2003 13:00:00	0	0	0	0	0	0	0	0	0	0	0	0	0
08/01/2003 14:00:00	0	0	0	0	0	0	0	0	0	0	0	0	0
08/01/2003 15:00:00	0	0	0	0	0	0	0	0	0	0	0	0	0
08/01/2003 16:00:00	0	0	0	0	0	0	0	0	0	0	0	0	0
08/01/2003 17:00:00	0	0	0	0	0	0	0	0	0	0	0	0	0
08/01/2003 18:00:00	0	0	0	0	0	0	0	0	0	0	0	0	0
08/01/2003 19:00:00	0	0	0	0	0	0	0	0	0	0	0	0	0
08/01/2003 20:00:00	0	0	0	0	0	0	0	0	0	0	0	0	0
08/01/2003 21:00:00	0	0	0	0	0	0	0	0	0	0	0	0	0
08/01/2003 22:00:00	0	0	0	0	0	0	0	0	0	0	0	0	0
08/01/2003 23:00:00	0	0	0	0	0	0	0	0	0	0	0	0	0
09/01/2003 00:00:00	0	0	0	0	0	0	0	0	0	0	0	0	0
09/01/2003 01:00:00	0	0	0	0	0	0	0	0	0	0	0	0	0
09/01/2003 02:00:00	0	0	0	0	0	0	0	0	0	0	0	0	0
09/01/2003 03:00:00	0	0	0	0	0	0	0	0	0	0	0	0	0
09/01/2003 04:00:00	0	0	0	0	0	0	0	0	0	0	0	0	0
09/01/2003 05:00:00	0	0	0	0	0	0	0	0	0	0	0	0	0
09/01/2003 06:00:00	0	0	0	0	0	0	0	0	0	0	0	0	0
09/01/2003 07:00:00	0	0	0	0	0	0	0	0	0	0	0	0	0
09/01/2003 08:00:00	0	0	0	0	0	0	0	0	0	0	0	0	0
09/01/2003 09:00:00	0	0	0	0	0	0	0	0	0	0	0	0	0
09/01/2003 10:00:00	0	0	0	0	0	0	0	0	0	0	0	0	0
09/01/2003 11:00:00	0	0	0	0	0	0	0	0	0	0	0	0	0
09/01/2003 12:00:00	0	0	0	0	0	0	0	0	0	0	0	0	0
09/01/2003 13:00:00	0	0	0	0	0	0	0	0	0	0	0	0	0
09/01/2003 14:00:00	0	0	0	0	0	0	0	0	0	0	0	0	0
09/01/2003 15:00:00	0	0	0	0	0	0	0	0	0	0	0	0	0
09/01/2003 16:00:00	0	0	0	0	0	0	0	0	0	0	0	0	0
09/01/2003 17:00:00	0	0	0	0	0	0	0	0	0	0	0	0	0
09/01/2003 18:00:00	0	0	0	0	0	0	0	0	0	0	0	0	0
09/01/2003 19:00:00	0	0	0	0	0	0	0	0	0	0	0	0	0
09/01/2003 20:00:00	0	0	0	0	0	0	0	0	0	0	0	0	0
09/01/2003 21:00:00	0	0	0	0	0	0	0	0	0	0	0	0	0
09/01/2003 22:00:00	0	0	0	0	0	0	0	0	0	0	0	0	0
09/01/2003 23:00:00	0	0	0	0	0	0	0	0	0	0	0	0	0
10/01/2003 00:00:00	0	0	0	0	0	0	0	0	0	0	0	0	0
10/01/2003 01:00:00	0	0	0	0	0	0	0	0	0	0	0	0	0
10/01/2003 02:00:00	0	0	0	0	0	0	0	0	0	0	0	0	0
10/01/2003 03:00:00	0	0	0	0	0	0	0	0	0	0	0	0	0
10/01/2003 04:00:00	0	0	0	0	0	0	0	0	0	0	0	0	0
10/01/2003 05:00:00	0	0	0	0	0	0	0	0	0	0	0	0	0
10/01/2003 06:00:00	0	0	0	0	0	0	0	0	0	0	0	0	0
10/01/2003 07:00:00	0	0	0	0	0	0	0	0	0	0	0	0	0
10/01/2003 08:00:00	0	0	0	0	0	0	0	0	0	0	0	0	0
10/01/2003 09:00:00	0	0	0	0	0	0	0	0	0	0	0	0	0
10/01/2003 10:00:00	0	0	0	0	0	0	0	0	0	0	0	0	0
10/01/2003 11:00:00	0	0	0	0	0	0	0	0	0	0	0	0	0
10/01/2003 12:00:00	0	0	0	0	0	0	0	0	0	0	0	0	0
10/01/2003 13:00:00	0	0	0	0	0	0	0	0	0	0	0	0	0
10/01/2003 14:00:00	0	0	0	0	0	0	0	0	0	0	0	0	0
10/01/2003 15:00:00	0	0	0	0	0	0	0	0	0	0	0	0	0
10/01/2003 16:00:00	0	0	0	0	0	0	0	0	0	0	0	0	0
10/01/2003 17:00:00	0	0	0	0	0	0	0	0	0	0	0	0	0
10/01/2003 18:00:00	0	0	0	0	0	0	0	0	0	0	0	0	0
10/01/2003 19:00:00	0	0	0	0	0	0	0	0	0	0	0	0	0
10/01/2003 20:00:00	0	0	0	0	0	0	0	0	0	0	0	0	0
10/01/2003 21:00:00	0	0	0	0	0	0	0	0	0	0	0	0	0
10/01/2003 22:00:00	0	0	0	0	0	0	0	0	0	0	0	0	0
10/01/2003 23:00:00	0	0	0	0	0	0	0	0	0	0	0	0	0
11/01/2003 00:00:00	0	0	0	0	0	0	0	0	0	0	0	0	0
11/01/2003 01:00:00	0	0	0	0	0	0	0	0	0	0	0	0	0
11/01/2003 02:00:00	0	0	0	0	0	0	0	0	0	0	0	0	0
11/01/2003 03:00:00	0	0	0	0	0	0	0	0	0	0	0	0	0
11/01/2003 04:00:00	0	0	0	0	0	0	0	0	0	0	0	0	0
11/01/2003 05:00:00	0	0	0	0	0	0	0	0	0	0	0	0	0
11/01/2003 06:00:00	0	0	0	0	0	0	0	0	0	0	0	0	0
11/01/2003 07:00:00	0	0	0	0	0	0	0	0	0	0	0	0	0
11/01/2003 08:00:00	0	0	0	0	0	0	0	0	0	0	0	0	0
11/01/2003 09:00:00	0	0	0	0	0	0	0	0	0	0	0	0	0
11/01/2003 10:00:00	0	0	0	0	0	0	0	0	0	0	0	0	0
11/01/2003 11:00:00	0	0	0	0	0	0	0	0	0	0	0	0	0
11/01/2003 12:00:00	0	0	0	0	0	0	0	0	0	0	0	0	0
11/01/2003 13:00:00	0	0	0	0	0	0	0	0	0	0	0	0	0
11/01/2003 14:00:00	0	0	0	0	0	0	0	0	0	0	0	0	0
11/01/2003 15:00:00	0	0	0	0	0	0	0	0	0	0	0	0	0
11/01/2003 16:00:00	0	0	0	0	0	0	0	0	0	0	0	0	0
11/01/2003 17:00:00	0	0	0	0	0	0	0	0	0	0	0	0	0
11/01/2003 18:00:00	0	0	0	0	0	0	0	0	0	0	0	0	0
11/01/2003 19:00:00	0	0	0	0	0	0	0	0	0	0	0	0	0
11/01/2003 20:00:00	0	0	0	0	0	0	0	0	0	0	0	0	0
11/01/2003 21:00:00	0	0	0	0	0	0	0	0	0	0	0	0	0
11/01/2003 22:00:00	0	0	0	0	0	0	0	0	0	0	0	0	0
11/01/2003 23:00:00	0	0	0	0	0	0	0	0	0	0	0	0	0
12/01/2003 00:00:00	0	0	0	0	0	0	0	0	0	0	0	0	0
12/01/2003 01:00:00	0	0	0	0	0	0	0	0	0	0	0	0	0
12/01/2003 02:00:00	0	0	0	0	0	0	0	0	0	0	0	0	0
12/01/2003 03:00:00	0	0	0	0	0	0	0	0	0	0	0	0	0
12/01/2003 04:00:00	0	0	0	0	0	0	0	0	0	0	0	0	0
12/01/2003 05:00:00	0	0	0	0	0	0	0	0	0	0	0	0	0
12/01/2003 06:00:00	0	0	0	0	0	0	0	0	0	0	0	0	0
12/01/2003 07:00:00	0	0	0	0	0	0	0	0	0	0	0	0	0
12/01/2003 08:00:00	0	0	0	0	0	0	0	0	0	0	0	0	0
12/01/2003 09:00:00	0	0	0	0	0	0	0	0	0	0	0	0	0
12/01/2003 10:00:00	0	0	0	0	0	0	0	0	0	0	0	0	0
12/01/2003 11:00:00	0	0	0	0	0	0	0	0	0	0	0	0	0
12/01/2003 12:00:00	0	0	0	0	0	0	0	0	0	0	0	0	0
12/01/2003 13:00:00	0	0	0	0	0	0	0	0	0	0	0	0	0
12/01/2003 14:00:00	0	0	0	0	0	0	0	0	0	0	0	0	0
12/01/2003 15:00:00	0	0	0	0	0	0	0	0	0	0	0	0	0
12/01/2003 16:00:00	0	0	0	0	0	0	0	0	0	0	0	0	0
12/01/2003 17:00:00	0	0	0	0	0	0	0	0	0	0	0	0	0
12/01/2003 18:00:00	0	0	0	0	0	0	0	0	0	0	0	0	0
12/01/2003 19:00:00	0	0	0	0	0	0	0	0	0	0	0	0	0
12/01/2003 20:00:00	0	0	0	0	0	0	0	0	0	0	0	0	0
12/01/2003 21:00:00	0	0	0	0	0	0	0	0	0	0	0	0	0
12/01/2003 22:00:00	0	0	0	0	0	0	0	0	0	0	0	0	0
12/01/2003 23:00:00	0	0	0	0	0	0	0	0	0	0	0	0	0
13/01/2003 00:00:00	0	0	0	0	0	0	0	0	0	0	0	0	0
13/01/2003 01:00:00	0	0	0	0	0	0	0	0	0	0	0	0	0
13/01/2003 02:00:00	0	0	0	0	0	0	0	0	0	0	0	0	0
13/01/2003 03:00:00	0	0	0	0	0	0	0	0	0	0	0	0	0
13/01/2003 04:00:00	0	0	0	0	0	0	0	0	0	0	0	0	0
13/01/2003 05:00:00	0	0	0	0	0	0	0	0	0	0	0	0	0
13/01/2003 06:00:00	0	0	0	0	0	0	0	0	0	0	0	0	0
13/01/2003 07:00:00	0	0	0	0	0	0	0	0	0	0	0	0	0
13/01/2003 08:00:00	0	0	0	0	0	0	0	0	0	0	0	0	0
13/01/2003 09:00:00	0	0	0	0	0	0	0	0	0	0	0	0	0
13/01/2003 10:00:00	0	0	0	0	0	0	0	0	0	0	0	0	0
13/01/2003 11:00:00	0	0	0	0	0	0	0	0	0	0	0	0	0
13/01/2003 12:00:00	0	0	0	0	0	0	0	0	0	0	0	0	0
13/01/2003 13:00:00	0	0	0	0	0	0	0	0	0	0	0	0	0
13/01/2003 14:00:00	0	0	0	0	0	0	0	0	0	0	0	0	0
13/01/2003 15:00:00	0	0	0	0	0	0	0	0	0	0	0	0	0
13/01/2003 16:00:00	0	0	0	0	0	0	0	0	0	0	0	0	0
13/01/2003 17:00:00	0	0	0	0	0	0	0	0	0	0	0	0	0
13/01/2003 18:00:00	0	0	0	0	0	0	0	0	0	0	0	0	0
13/01/2003 19:00:00	0	0	0	0	0	0	0	0	0	0	0	0	0
13/01/2003 20:00:00	0	0	0	0	0	0	0	0	0	0	0	0	0
13/01/2003 21:00:00	0	0	0	0	0	0	0	0	0	0	0	0	0
13/01/2003 22:00:00	0	0	0	0	0	0	0	0	0	0	0	0	0
13/01/2003 23:00:00	0	0	0	0	0	0	0	0	0	0	0	0	0
14/01/2003 00:00:00	0	0	0	0	0	0	0	0	0	0	0	0	0
14/01/2003 01:00:00	0	0	0	0	0	0	0	0	0	0	0	0	0
14/01/2003 02:00:00	0	0	0	0	0	0	0	0	0	0	0	0	0
14/01/2003 03:00:00	0	0	0	0	0	0	0	0	0	0	0	0	0
14/01/2003 04:00:00	0	0	0	0	0	0	0	0	0	0	0	0	0
14/01/2003 05:00:00	0	0	0	0	0	0	0	0	0	0	0	0	0
14/01/2003 06:00:00	0	0	0	0	0	0	0	0	0	0	0	0	0
14/01/2003 07:00:00	0	0	0	0	0	0	0	0	0	0	0	0	0
14/01/2003 08:00:00	0	0	0	0	0	0	0	0	0	0	0	0	0
14/01/2003 09:00:00	0	0	0	0	0	0	0	0	0	0	0	0	0
14/01/2003 10:00:00	0	0	0	0	0	0	0	0	0	0	0	0	0
14/01/2003 11:00:00	0	0	0	0	0	0	0	0	0	0	0	0	0
14/01/2003 12:00:00	0	0	0	0	0	0	0	0	0	0	0	0	0
14/01/2003 13:00:00	0	0	0	0	0	0	0	0	0	0	0	0	0
14/01/2003 14:00:00	0	0	0	0	0	0	0	0	0	0	0	0	0
14/01/2003 15:00:00	0	0	0	0	0	0	0	0	0	0	0	0	0
14/01/2003 16:00:00	0	0	0	0	0	0	0	0	0	0	0	0	0
14/01/2003 17:00:00	0	0	0	0	0	0	0	0	0	0	0	0	0
14/01/2003 18:00:00	0	0	0	0	0	0	0	0	0	0	0	0	0
14/01/2003 19:00:00	0	0	0	0	0	0	0	0	0	0	0	0	0
14/01/2003 20:00:00	0	0	0	0	0	0	0	0	0	0	0	0	0
14/01/2003 21:00:00	0	0	0	0	0	0	0	0	0	0	0	0	0
14/01/2003 22:00:00	0	0	0	0	0	0	0	0	0	0	0	0	0
14/01/2003 23:00:00	0	0	0	0	0	0	0	0	0	0	0	0	0
15/01/2003 00:00:00	0	0	0	0	0	0	0	0	0	0	0	0	0
15/01/2003 01:00:00	0	0	0	0	0	0	0	0	0	0	0	0	0
15/01/2003 02:00:00	0	0	0	0	0	0	0	0	0	0	0	0	0
15/01/2003 03:00:00	0	0	0	0	0	0	0	0	0	0	0	0	0
15/01/2003 04:00:00	0	0	0	0	0	0	0	0	0	0	0	0	0
15/01/2003 05:00:00	0	0	0	0	0	0	0	0	0	0	0	0	0
15/01/2003 06:00:00	0	0	0	0	0	0	0	0	0	0	0	0	0
15/01/2003 07:00:00	0	0	0	0	0	0	0	0	0	0	0	0	0
15/01/2003 08:00:00	0	0	0	0	0	0	0	0	0	0	0	0	0
15/01/2003 09:00:00	0	0	0	0	0	0	0	0	0	0	0	0	0
15/01/2003 10:00:00	0	0	0	0	0	0	0	0	0	0	0	0	0
15/01/2003 11:00:00	0	0	0	0	0	0	0	0	0	0	0	0	0
15/01/2003 12:00:00	0	0	0	0	0	0	0	0	0	0	0	0	0
15/01/2003 13:00:00	0	0	0	0	0	0	0	0	0	0	0	0	0
15/01/2003 14:00:00	0	0	0	0	0	0	0	0	0	0	0	0	0
15/01/2003 15:00:00	0	0	0	0	0	0	0	0	0	0	0	0	0
15/01/2003 16:00:00	0	0	0	0	0	0	0	0	0	0	0	0	0
15/01/2003 17:00:00	0	0	0	0	0	0	0	0	0	0	0	0	0
15/01/2003 18:00:00	0	0	0	0	0	0	0	0	0	0	0	0	0
15/01/2003 19:00:00	0	0	0	0	0	0	0	0	0	0	0	0	0
15/01/2003 20:00:00	0	0	0	0	0	0	0	0	0	0	0	0	0
15/01/2003 21:00:00	0	0	0	0	0	0	0	0	0	0	0	0	0
15/01/2003 22:00:00	0	0	0	0	0	0	0	0	0	0	0	0	0
15/01/2003 23:00:00	0	0	0	0	0	0	0	0	0	0	0	0	0
16/01/2003 00:00:00	0	0	0	0	0	0	0	0	0	0	0	0	0
16/01/2003 01:00:00	0	0	0	0	0	0	0	0	0	0	0	0	0
16/01/2003 02:00:00	0	0	0	0	0	0	0	0	0	0	0	0	0
16/01/2003 03:00:00	0	0	0	0	0	0	0	0	0	0	0	0	0
16/01/2003 04:00:00	0	0	0	0	0	0	0	0	0	0	0	0	0
16/01/2003 05:00:00	0	0	0	0	0	0	0	0	0	0	0	0	0
16/01/2003 06:00:00	0	0	0	0	0	0	0	0	0	0	0	0	0
16/01/2003 07:00:00	0	0	0	0	0	0	0	0	0	0	0	0	0
16/01/2003 08:00:00	0	0	0	0	0	0	0	0	0	0	0	0	0
16/01/2003 09:00:00	0	0	0	0	0	0	0	0	0	0	0	0	0
16/01/2003 10:00:00	0	0	0	0	0	0	0	0	0	0	0	0	0
16/01/2003 11:00:00	0	0	0	0	0	0	0	0	0	0	0	0	0
16/01/2003 12:00:00	0	0	0	0	0	0	0	0	0	0	0	0	0
16/01/2003 13:00:00	0	0	0	0	0	0	0	0	0	0	0	0	0
16/01/2003 14:00:00	0	0	0	0	0	0	0	0	0	0	0	0	0
16/01/2003 15:00:00	0	0	0	0	0	0	0	0	0	0	0	0	0
16/01/2003 16:00:00	0	0	0	0	0	0	0	0	0	0	0	0	0
16/01/2003 17:00:00	0	0	0	0	0	0	0	0	0	0	0	0	0
16/01/2003 18:00:00	0	0	0	0	0	0	0	0	0	0	0	0	0
16/01/2003 19:00:00	0	0	0	0	0	0	0	0	0	0	0	0	0
16/01/2003 20:00:00	0	0	0	0	0	0	0	0	0	0	0	0	0
16/01/2003 21:00:00	0	0	0	0	0	0	0	0	0	0	0	0	0
16/01/2003 22:00:00	0	0	0	0	0	0	0	0	0	0	0	0	0
16/01/2003 23:00:00	0	0	0	0	0	0	0	0	0	0	0	0	0
17/01/2003 00:00:00	0	0	0	0	0	0	0	0	0	0	0	0	0
17/01/2003 01:00:00	0	0	0	0	0	0	0	0	0	0	0	0	0
17/01/2003 02:00:00	0	0	0	0	0	0	0	0	0	0	0	0	0
17/01/2003 03:00:00	0	0	0	0	0	0	0	0	0	0	0	0	0
17/01/2003 04:00:00	0	0	0	0	0	0	0	0	0	0	0	0	0
17/01/2003 05:00:00	0	0	0	0	0	0	0	0	0	0	0	0	0
17/01/2003 06:00:00	0	0	0	0	0	0	0	0	0	0	0	0	0
17/01/2003 07:00:00	0	0	0	0	0	0	0	0	0	0	0	0	0
17/01/2003 08:00:00	0	0	0	0	0	0	0	0	0	0	0	0	0
17/01/2003 09:00:00	0	0	0	0	0	0	0	0	0	0	0	0	0
17/01/2003 10:00:00	0	0	0	0	0	0	0	0	0	0	0	0	0
17/01/2003 11:00:00	0	0	0	0	0	0	0	0	0	0	0	0	0
17/01/2003 12:00:00	0	0	0	0	0	0	0	0	0	0	0	0	0
17/01/2003 13:00:00	0	0	0	0	0	0	0	0	0	0	0	0	0
17/01/2003 14:00:00	0	0	0	0	0	0	0	0	0	0	0	0	0
17/01/2003 15:00:00	0	0	0	0	0	0	0	0	0	0	0	0	0
17/01/2003 16:00:00	0	0	0	0	0	0	0	0	0	0	0	0	0
17/01/2003 17:00:00	0	0	0	0	0	0	0	0	0	0	0	0	0
17/01/2003 18:00:00	0	0	0	0	0	0	0	0	0	0	0	0	0
17/01/2003 19:00:00	0	0	0	0	0	0	0	0	0	0	0	0	0
17/01/2003 20:00:00	0	0	0	0	0	0	0	0	0	0	0	0	0
17/01/2003 21:00:00	0	0	0	0	0	0	0	0	0	0	0	0	0
17/01/2003 22:00:00	0	0	0	0	0	0	0	0	0	0	0	0	0
17/01/2003 23:00:00	0	0	0	0	0	0	0	0	0	0	0	0	0
18/01/2003 00:00:00	0	0	0	0	0	0	0	0	0	0	0	0	0
18/01/2003 01:00:00	0	0	0	0	0	0	0	0	0	0	0	0	0
18/01/2003 02:00:00	0	0	0	0	0	0	0	0	0	0	0	0	0
18/01/2003 03:00:00	0	0	0	0	0	0	0	0	0	0	0	0	0
18/01/2003 04:00:00	0	0	0	0	0	0	0	0	0	0	0	0	0
18/01/2003 05:00:00	0	0	0	0	0	0	0	0	0	0	0	0	0
18/01/2003 06:00:00	0	0	0	0	0	0	0	0	0	0	0	0	0
18/01/2003 07:00:00	0	0	0	0	0	0	0	0	0	0	0	0	0
18/01/2003 08:00:00	0	0	0	0	0	0	0	0	0	0	0	0	0
18/01/2003 09:00:00	0	0	0	0	0	0	0	0	0	0	0	0	0
18/01/2003 10:00:00	0	0	0	0	0	0	0	0	0	0	0	0	0
18/01/2003 11:00:00	0	0	0	0	0	0	0	0	0	0	0	0	0
18/01/2003 12:00:00	0	0	0	0	0	0	0	0	0	0	0	0	0
18/01/2003 13:00:00	0	0	0	0	0	0	0	0	0	0	0	0	0
18/01/2003 14:00:00	0	0	0	0	0	0	0	0	0	0	0	0	0
18/01/2003 15:00:00	0	0	0	0	0	0	0	0	0	0	0	0	0
18/01/2003 16:00:00	0	0	0	0	0	0	0	0	0	0	0	0	0
18/01/2003 17:00:00	0	0	0	0	0	0	0	0	0	0	0	0	0
18/01/2003 18:00:00	0	0	0	0	0	0	0	0	0	0	0	0	0
18/01/2003 19:00:00	0	0	0	0	0	0	0	0	0	0	0	0	0
18/01/2003 20:00:00	0	0	0	0	0	0	0	0	0	0	0	0	0
18/01/2003 21:00:00	0	0	0	0	0	0	0	0	0	0	0	0	0
18/01/2003 22:00:00	0	0	0	0	0	0	0	0	0	0	0	0	0
18/01/2003 23:00:00	0	0	0	0	0	0	0	0	0	0	0	0	0
19/01/2003 00:00:00	0	0	0	0	0	0	0	0	0	0	0	0	0
19/01/2003 01:00:00	0	0	0	0	0	0	0	0	0	0	0	0	0
19/01/2003 02:00:00	0	0	0	0	0	0	0	0	0	0	0	0	0
19/01/2003 03:00:00	0	0	0	0	0	0	0	0	0	0	0	0	0
19/01/2003 04:00:00	0	0	0	0	0	0	0	0	0	0	0	0	0
19/01/2003 05:00:00	0	0	0	0	0	0	0	0	0	0	0	0	0
19/01/2003 06:00:00	0	0	0	0	0	0	0	0	0	0	0	0	0
19/01/2003 07:00:00	0	0	0	0	0	0	0	0	0	0	0	0	0
19/01/2003 08:00:00	0	0	0	0	0	0	0	0	0	0	0	0	0
19/01/2003 09:00:00	0	0	0	0	0	0	0	0	0	0	0	0	0
19/01/2003 10:00:00	0	0	0	0	0	0	0	0	0	0	0	0	0
19/01/2003 11:00:00	0	0	0	0	0	0	0	0	0	0	0	0	0
19/01/2003 12:00:00	0	0	0	0	0	0	0	0	0	0	0	0	0
19/01/2003 13:00:00	0	0	0	0	0	0	0	0	0	0	0	0	0
19/01/2003 14:00:00	0	0	0	0	0	0	0	0	0	0	0	0	0
19/01/2003 15:00:00	0	0	0	0	0	0	0	0	0	0	0	0	0
19/01/2003 16:00:00	0	0	0	0	0	0	0	0	0	0	0	0	0
19/01/2003 17:00:00	0	0	0	0	0	0	0	0	0	0	0	0	0
19/01/2003 18:00:00	0	0	0	0	0	0	0	0	0	0	0	0	0
19/01/2003 19:00:00	0	0	0	0	0	0	0	0	0	0	0	0	0
19/01/2003 20:00:00	0	0	0	0	0	0	0	0	0	0	0	0	0
19/01/2003 21:00:00	0	0	0	0	0	0	0	0	0	0	0	0	0
19/01/2003 22:00:00	0	0	0	0	0	0	0	0	0	0	0	0	0
19/01/2003 23:00:00	0	0	0	0	0	0	0	0	0	0	0	0	0
20/01/2003 00:00:00	0	0	0	0	0	0	0	0	0	0	0	0	0
20/01/2003 01:00:00	0	0	0	0	0	0	0	0	0	0	0	0	0
20/01/2003 02:00:00	0	0	0	0	0	0	0	0	0	0	0	0	0
20/01/2003 03:00:00	0	0	0	0	0	0	0	0	0	0	0	0	0
20/01/2003 04:00:00	0	0	0	0	0	0	0	0	0	0	0	0	0
20/01/2003 05:00:00	0	0	0	0	0	0	0	0	0	0	0	0	0
20/01/2003 06:00:00	0	0	0	0	0	0	0	0	0	0	0	0	0
20/01/2003 07:00:00	0	0	0	0	0	0	0	0	0	0	0	0	0
20/01/2003 08:00:00	0	0	0	0	0	0	0	0	0	0	0	0	0
20/01/2003 09:00:00	0	0	0	0	0	0	0	0	0	0	0	0	0
20/01/2003 10:00:00	0	0	0	0	0	0	0	0	0	0	0	0	0
20/01/2003 11:00:00	0	0	0	0	0	0	0	0	0	0	0	0	0
20/01/2003 12:00:00	0	0	0	0	0	0	0	0	0	0	0	0	0
20/01/2003 13:00:00	0	0	0	0	0	0	0	0	0	0	0	0	0
20/01/2003 14:00:00	0	0	0	0	0	0	0	0	0	0	0	0	0
20/01/2003 15:00:00	0	0	0	0	0	0	0	0	0	0	0	0	0
20/01/2003 16:00:00	0	0	0	0	0	0	0	0	0	0	0	0	0
20/01/2003 17:00:00	0	0	0	0	0	0	0	0	0	0	0	0	0
20/01/2003 18:00:00	0	0	0	0	0	0	0	0	0	0	0	0	0
20/01/2003 19:00:00	0	0	0	0	0	0	0	0	0	0	0	0	0
20/01/2003 20:00:00	0	0	0	0	0	0	0	0	0	0	0	0	0
20/01/2003 21:00:00	0	0	0	0	0	0	0	0	0	0	0	0	0
20/01/2003 22:00:00	0	0	0	0	0	0	0	0	0	0	0	0	0
20/01/2003 23:00:00	0	0	0	0	0	0	0	0	0	0	0	0	0
21/01/2003 00:00:00	0.225	0.229166667	0.316666667	0.3375	0.45	0.458333333	0.325	0.4	0.2	0.266666667	0.279166667	0.404166667	0.1875
21/01/2003 01:00:00	0.225	0.229166667	0.316666667	0.3375	0.45	0.458333333	0.325	0.4	0.2	0.266666667	0.279166667	0.404166667	0.1875
21/01/2003 02:00:00	0.225	0.229166667	0.316666667	0.3375	0.45	0.458333333	0.325	0.4	0.2	0.266666667	0.279166667	0.404166667	0.1875
21/01/2003 03:00:00	0.225	0.229166667	0.316666667	0.3375	0.45	0.458333333	0.325	0.4	0.2	0.266666667	0.279166667	0.404166667	0.1875
21/01/2003 04:00:00	0.225	0.229166667	0.316666667	0.3375	0.45	0.458333333	0.325	0.4	0.2	0.266666667	0.279166667	0.404166667	0.1875
21/01/2003 05:00:00	0.225	0.229166667	0.316666667	0.3375	0.45	0.458333333	0.325	0.4	0.2	0.266666667	0.279166667	0.404166667	0.1875
21/01/2003 06:00:00	0.225	0.229166667	0.316666667	0.3375	0.45	0.458333333	0.325	0.4	0.2	0.266666667	0.279166667	0.404166667	0.1875
21/01/2003 07:00:00	0.225	0.229166667	0.316666667	0.3375	0.45	0.458333333	0.325	0.4	0.2	0.266666667	0.279166667	0.404166667	0.1875
21/01/2003 08:00:00	0.225	0.229166667	0.316666667	0.3375	0.45	0.458333333	0.325	0.4	0.2	0.266666667	0.279166667	0.404166667	0.1875
21/01/2003 09:00:00	0.225	0.229166667	0.316666667	0.3375	0.45	0.458333333	0.325	0.4	0.2	0.266666667	0.279166667	0.404166667	0.1875
21/01/2003 10:00:00	0.225	0.229166667	0.316666667	0.3375	0.45	0.458333333	0.325	0.4	0.2	0.266666667	0.279166667	0.404166667	0.1875
21/01/2003 11:00:00	0.225	0.229166667	0.316666667	0.3375	0.45	0.458333333	0.325	0.4	0.2	0.266666667	0.279166667	0.404166667	0.1875
21/01/2003 12:00:00	0.225	0.229166667	0.316666667	0.3375	0.45	0.458333333	0.325	0.4	0.2	0.266666667	0.279166667	0.404166667	0.1875
21/01/2003 13:00:00	0.225	0.229166667	0.316666667	0.3375	0.45	0.458333333	0.325	0.4	0.2	0.266666667	0.279166667	0.404166667	0.1875
21/01/2003 14:00:00	0.225	0.229166667	0.316666667	0.3375	0.45	0.458333333	0.325	0.4	0.2	0.266666667	0.279166667	0.404166667	0.1875
21/01/2003 15:00:00	0.225	0.229166667	0.316666667	0.3375	0.45	0.458333333	0.325	0.4	0.2	0.266666667	0.279166667	0.404166667	0.1875
21/01/2003 16:00:00	0.225	0.229166667	0.316666667	0.3375	0.45	0.458333333	0.325	0.4	0.2	0.266666667	0.279166667	0.404166667	0.1875
21/01/2003 17:00:00	0.225	0.229166667	0.316666667	0.3375	0.45	0.458333333	0.325	0.4	0.2	0.266666667	0.279166667	0.404166667	0.1875
21/01/2003 18:00:00	0.225	0.229166667	0.316666667	0.3375	0.45	0.458333333	0.325	0.4	0.2	0.266666667	0.279166667	0.404166667	0.1875
21/01/2003 19:00:00	0.225	0.229166667	0.316666667	0.3375	0.45	0.458333333	0.325	0.4	0.2	0.266666667	0.279166667	0.404166667	0.1875
21/01/2003 20:00:00	0.225	0.229166667	0.316666667	0.3375	0.45	0.458333333	0.325	0.4	0.2	0.266666667	0.279166667	0.404166667	0.1875
21/01/2003 21:00:00	0.225	0.229166667	0.316666667	0.3375	0.45	0.458333333	0.325	0.4	0.2	0.266666667	0.279166667	0.404166667	0.1875
21/01/2003 22:00:00	0.225	0.229166667	0.316666667	0.3375	0.45	0.458333333	0.325	0.4	0.2	0.266666667	0.279166667	0.404166667	0.1875
21/01/2003 23:00:00	0.225	0.229166667	0.316666667	0.3375	0.45	0.458333333	0.325	0.4	0.2	0.266666667	0.279166667	0.404166667	0.1875
22/01/2003 00:00:00	0	0	0	0	0	0	0	0	0	0	0	0	0
22/01/2003 01:00:00	0	0	0	0	0	0	0	0	0	0	0	0	0
22/01/2003 02:00:00	0	0	0	0	0	0	0	0	0	0	0	0	0
22/01/2003 03:00:00	0	0	0	0	0	0	0	0	0	0	0	0	0
22/01/2003 04:00:00	0	0	0	0	0	0	0	0	0	0	0	0	0
22/01/2003 05:00:00	0	0	0	0	0	0	0	0	0	0	0	0	0
22/01/2003 06:00:00	0	0	0	0	0	0	0	0	0	0	0	0	0
22/01/2003 07:00:00	0	0	0	0	0	0	0	0	0	0	0	0	0
22/01/2003 08:00:00	0	0	0	0	0	0	0	0	0	0	0	0	0
22/01/2003 09:00:00	0	0	0	0	0	0	0	0	0	0	0	0	0
22/01/2003 10:00:00	0	0	0	0	0	0	0	0	0	0	0	0	0
22/01/2003 11:00:00	0	0	0	0	0	0	0	0	0	0	0	0	0
22/01/2003 12:00:00	0	0	0	0	0	0	0	0	0	0	0	0	0
22/01/2003 13:00:00	0	0	0	0	0	0	0	0	0	0	0	0	0
22/01/2003 14:00:00	0	0	0	0	0	0	0	0	0	0	0	0	0
22/01/2003 15:00:00	0	0	0	0	0	0	0	0	0	0	0	0	0
22/01/2003 16:00:00	0	0	0	0	0	0	0	0	0	0	0	0	0
22/01/2003 17:00:00	0	0	0	0	0	0	0	0	0	0	0	0	0
22/01/2003 18:00:00	0	0	0	0	0	0	0	0	0	0	0	0	0
22/01/2003 19:00:00	0	0	0	0	0	0	0	0	0	0	0	0	0
22/01/2003 20:00:00	0	0	0	0	0	0	0	0	0	0	0	0	0
22/01/2003 21:00:00	0	0	0	0	0	0	0	0	0	0	0	0	0
22/01/2003 22:00:00	0	0	0	0	0	0	0	0	0	0	0	0	0
22/01/2003 23:00:00	0	0	0	0	0	0	0	0	0	0	0	0	0
23/01/2003 00:00:00	0	0	0	0	0	0	0	0	0	0	0	0	0
23/01/2003 01:00:00	0	0	0	0	0	0	0	0	0	0	0	0	0
23/01/2003 02:00:00	0	0	0	0	0	0	0	0	0	0	0	0	0
23/01/2003 03:00:00	0	0	0	0	0	0	0	0	0	0	0	0	0
23/01/2003 04:00:00	0	0	0	0	0	0	0	0	0	0	0	0	0
23/01/2003 05:00:00	0	0	0	0	0	0	0	0	0	0	0	0	0
23/01/2003 06:00:00	0	0	0	0	0	0	0	0	0	0	0	0	0
23/01/2003 07:00:00	0	0	0	0	0	0	0	0	0	0	0	0	0
23/01/2003 08:00:00	0	0	0	0	0	0	0	0	0	0	0	0	0
23/01/2003 09:00:00	0	0	0	0	0	0	0	0	0	0	0	0	0
23/01/2003 10:00:00	0	0	0	0	0	0	0	0	0	0	0	0	0
23/01/2003 11:00:00	0	0	0	0	0	0	0	0	0	0	0	0	0
23/01/2003 12:00:00	0	0	0	0	0	0	0	0	0	0	0	0	0
23/01/2003 13:00:00	0	0	0	0	0	0	0	0	0	0	0	0	0
23/01/2003 14:00:00	0	0	0	0	0	0	0	0	0	0	0	0	0
23/01/2003 15:00:00	0	0	0	0	0	0	0	0	0	0	0	0	0
23/01/2003 16:00:00	0	0	0	0	0	0	0	0	0	0	0	0	0
23/01/2003 17:00:00	0	0	0	0	0	0	0	0	0	0	0	0	0
23/01/2003 18:00:00	0	0	0	0	0	0	0	0	0	0	0	0	0
23/01/2003 19:00:00	0	0	0	0	0	0	0	0	0	0	0	0	0
23/01/2003 20:00:00	0	0	0	0	0	0	0	0	0	0	0	0	0
23/01/2003 21:00:00	0	0	0	0	0	0	0	0	0	0	0	0	0
23/01/2003 22:00:00	0	0	0	0	0	0	0	0	0	0	0	0	0
23/01/2003 23:00:00	0	0	0	0	0	0	0	0	0	0	0	0	0
24/01/2003 00:00:00	0.020833333	0	0	0.008333333	0.020833333	0	0.05	0.0375	0.025	0.033333333	0.054166667	0.033333333	0.104166667
24/01/2003 01:00:00	0.020833333	0	0	0.008333333	0.020833333	0	0.05	0.0375	0.025	0.033333333	0.054166667	0.033333333	0.104166667
24/01/2003 02:00:00	0.020833333	0	0	0.008333333	0.020833333	0	0.05	0.0375	0.025	0.033333333	0.054166667	0.033333333	0.104166667
24/01/2003 03:00:00	0.020833333	0	0	0.008333333	0.020833333	0	0.05	0.0375	0.025	0.033333333	0.054166667	0.033333333	0.104166667
24/01/2003 04:00:00	0.020833333	0	0	0.008333333	0.020833333	0	0.05	0.0375	0.025	0.033333333	0.054166667	0.033333333	0.104166667
24/01/2003 05:00:00	0.020833333	0	0	0.008333333	0.020833333	0	0.05	0.0375	0.025	0.033333333	0.054166667	0.033333333	0.104166667
24/01/2003 06:00:00	0.020833333	0	0	0.008333333	0.020833333	0	0.05	0.0375	0.025	0.033333333	0.054166667	0.033333333	0.104166667
24/01/2003 07:00:00	0.020833333	0	0	0.008333333	0.020833333	0	0.05	0.0375	0.025	0.033333333	0.054166667	0.033333333	0.104166667
24/01/2003 08:00:00	0.020833333	0	0	0.008333333	0.020833333	0	0.05	0.0375	0.025	0.033333333	0.054166667	0.033333333	0.104166667
24/01/2003 09:00:00	0.020833333	0	0	0.008333333	0.020833333	0	0.05	0.0375	0.025	0.033333333	0.054166667	0.033333333	0.104166667
24/01/2003 10:00:00	0.020833333	0	0	0.008333333	0.020833333	0	0.05	0.0375	0.025	0.033333333	0.054166667	0.033333333	0.104166667
24/01/2003 11:00:00	0.020833333	0	0	0.008333333	0.020833333	0	0.05	0.0375	0.025	0.033333333	0.054166667	0.033333333	0.104166667
24/01/2003 12:00:00	0.020833333	0	0	0.008333333	0.020833333	0	0.05	0.0375	0.025	0.033333333	0.054166667	0.033333333	0.104166667
24/01/2003 13:00:00	0.020833333	0	0	0.008333333	0.020833333	0	0.05	0.0375	0.025	0.033333333	0.054166667	0.033333333	0.104166667
24/01/2003 14:00:00	0.020833333	0	0	0.008333333	0.020833333	0	0.05	0.0375	0.025	0.033333333	0.054166667	0.033333333	0.104166667
24/01/2003 15:00:00	0.020833333	0	0	0.008333333	0.020833333	0	0.05	0.0375	0.025	0.033333333	0.054166667	0.033333333	0.104166667
24/01/2003 16:00:00	0.020833333	0	0	0.008333333	0.020833333	0	0.05	0.0375	0.025	0.033333333	0.054166667	0.033333333	0.104166667
24/01/2003 17:00:00	0.020833333	0	0	0.008333333	0.020833333	0	0.05	0.0375	0.025	0.033333333	0.054166667	0.033333333	0.104166667
24/01/2003 18:00:00	0.020833333	0	0	0.008333333	0.020833333	0	0.05	0.0375	0.025	0.033333333	0.054166667	0.033333333	0.104166667
24/01/2003 19:00:00	0.020833333	0	0	0.008333333	0.020833333	0	0.05	0.0375	0.025	0.033333333	0.054166667	0.033333333	0.104166667
24/01/2003 20:00:00	0.020833333	0	0	0.008333333	0.020833333	0	0.05	0.0375	0.025	0.033333333	0.054166667	0.033333333	0.104166667
24/01/2003 21:00:00	0.020833333	0	0	0.008333333	0.020833333	0	0.05	0.0375	0.025	0.033333333	0.054166667	0.033333333	0.104166667
24/01/2003 22:00:00	0.020833333	0	0	0.008333333	0.020833333	0	0.05	0.0375	0.025	0.033333333	0.054166667	0.033333333	0.104166667
24/01/2003 23:00:00	0.020833333	0	0	0.008333333	0.020833333	0	0.05	0.0375	0.025	0.033333333	0.054166667	0.033333333	0.104166667
25/01/2003 00:00:00	0.083333333	0.116666667	0.075	0.095833333	0.116666667	0.125	0.145833333	0.158333333	0.166666667	0.0875	0.283333333	0.1	0.229166667
25/01/2003 01:00:00	0.083333333	0.116666667	0.075	0.095833333	0.116666667	0.125	0.145833333	0.158333333	0.166666667	0.0875	0.283333333	0.1	0.229166667
25/01/2003 02:00:00	0.083333333	0.116666667	0.075	0.095833333	0.116666667	0.125	0.145833333	0.158333333	0.166666667	0.0875	0.283333333	0.1	0.229166667
25/01/2003 03:00:00	0.083333333	0.116666667	0.075	0.095833333	0.116666667	0.125	0.145833333	0.158333333	0.166666667	0.0875	0.283333333	0.1	0.229166667
25/01/2003 04:00:00	0.083333333	0.116666667	0.075	0.095833333	0.116666667	0.125	0.145833333	0.158333333	0.166666667	0.0875	0.283333333	0.1	0.229166667
25/01/2003 05:00:00	0.083333333	0.116666667	0.075	0.095833333	0.116666667	0.125	0.145833333	0.158333333	0.166666667	0.0875	0.283333333	0.1	0.229166667
25/01/2003 06:00:00	0.083333333	0.116666667	0.075	0.095833333	0.116666667	0.125	0.145833333	0.158333333	0.166666667	0.0875	0.283333333	0.1	0.229166667
25/01/2003 07:00:00	0.083333333	0.116666667	0.075	0.095833333	0.116666667	0.125	0.145833333	0.158333333	0.166666667	0.0875	0.283333333	0.1	0.229166667
25/01/2003 08:00:00	0.083333333	0.116666667	0.075	0.095833333	0.116666667	0.125	0.145833333	0.158333333	0.166666667	0.0875	0.283333333	0.1	0.229166667
25/01/2003 09:00:00	0.083333333	0.116666667	0.075	0.095833333	0.116666667	0.125	0.145833333	0.158333333	0.166666667	0.0875	0.283333333	0.1	0.229166667
25/01/2003 10:00:00	0.083333333	0.116666667	0.075	0.095833333	0.116666667	0.125	0.145833333	0.158333333	0.166666667	0.0875	0.283333333	0.1	0.229166667
25/01/2003 11:00:00	0.083333333	0.116666667	0.075	0.095833333	0.116666667	0.125	0.145833333	0.158333333	0.166666667	0.0875	0.283333333	0.1	0.229166667
25/01/2003 12:00:00	0.083333333	0.116666667	0.075	0.095833333	0.116666667	0.125	0.145833333	0.158333333	0.166666667	0.0875	0.283333333	0.1	0.229166667
25/01/2003 13:00:00	0.083333333	0.116666667	0.075	0.095833333	0.116666667	0.125	0.145833333	0.158333333	0.166666667	0.0875	0.283333333	0.1	0.229166667
25/01/2003 14:00:00	0.083333333	0.116666667	0.075	0.095833333	0.116666667	0.125	0.145833333	0.158333333	0.166666667	0.0875	0.283333333	0.1	0.229166667
25/01/2003 15:00:00	0.083333333	0.116666667	0.075	0.095833333	0.116666667	0.125	0.145833333	0.158333333	0.166666667	0.0875	0.283333333	0.1	0.229166667
25/01/2003 16:00:00	0.083333333	0.116666667	0.075	0.095833333	0.116666667	0.125	0.145833333	0.158333333	0.166666667	0.0875	0.283333333	0.1	0.229166667
25/01/2003 17:00:00	0.083333333	0.116666667	0.075	0.095833333	0.116666667	0.125	0.145833333	0.158333333	0.166666667	0.0875	0.283333333	0.1	0.229166667
25/01/2003 18:00:00	0.083333333	0.116666667	0.075	0.095833333	0.116666667	0.125	0.145833333	0.158333333	0.166666667	0.0875	0.283333333	0.1	0.229166667
25/01/2003 19:00:00	0.083333333	0.116666667	0.075	0.095833333	0.116666667	0.125	0.145833333	0.158333333	0.166666667	0.0875	0.283333333	0.1	0.229166667
25/01/2003 20:00:00	0.083333333	0.116666667	0.075	0.095833333	0.116666667	0.125	0.145833333	0.158333333	0.166666667	0.0875	0.283333333	0.1	0.229166667
25/01/2003 21:00:00	0.083333333	0.116666667	0.075	0.095833333	0.116666667	0.125	0.145833333	0.158333333	0.166666667	0.0875	0.283333333	0.1	0.229166667
25/01/2003 22:00:00	0.083333333	0.116666667	0.075	0.095833333	0.116666667	0.125	0.145833333	0.158333333	0.166666667	0.0875	0.283333333	0.1	0.229166667
25/01/2003 23:00:00	0.083333333	0.116666667	0.075	0.095833333	0.116666667	0.125	0.145833333	0.158333333	0.166666667	0.0875	0.283333333	0.1	0.229166667
26/01/2003 00:00:00	0.033333333	0	0	0.0125	0.008333333	0	0.058333333	0.033333333	0.0875	0.175	0.025	0.025	0.2125
26/01/2003 01:00:00	0.033333333	0	0	0.0125	0.008333333	0	0.058333333	0.033333333	0.0875	0.175	0.025	0.025	0.2125
26/01/2003 02:00:00	0.033333333	0	0	0.0125	0.008333333	0	0.058333333	0.033333333	0.0875	0.175	0.025	0.025	0.2125
26/01/2003 03:00:00	0.033333333	0	0	0.0125	0.008333333	0	0.058333333	0.033333333	0.0875	0.175	0.025	0.025	0.2125
26/01/2003 04:00:00	0.033333333	0	0	0.0125	0.008333333	0	0.058333333	0.033333333	0.0875	0.175	0.025	0.025	0.2125
26/01/2003 05:00:00	0.033333333	0	0	0.0125	0.008333333	0	0.058333333	0.033333333	0.0875	0.175	0.025	0.025	0.2125
26/01/2003 06:00:00	0.033333333	0	0	0.0125	0.008333333	0	0.058333333	0.033333333	0.0875	0.175	0.025	0.025	0.2125
26/01/2003 07:00:00	0.033333333	0	0	0.0125	0.008333333	0	0.058333333	0.033333333	0.0875	0.175	0.025	0.025	0.2125
26/01/2003 08:00:00	0.033333333	0	0	0.0125	0.008333333	0	0.058333333	0.033333333	0.0875	0.175	0.025	0.025	0.2125
26/01/2003 09:00:00	0.033333333	0	0	0.0125	0.008333333	0	0.058333333	0.033333333	0.0875	0.175	0.025	0.025	0.2125
26/01/2003 10:00:00	0.033333333	0	0	0.0125	0.008333333	0	0.058333333	0.033333333	0.0875	0.175	0.025	0.025	0.2125
26/01/2003 11:00:00	0.033333333	0	0	0.0125	0.008333333	0	0.058333333	0.033333333	0.0875	0.175	0.025	0.025	0.2125
26/01/2003 12:00:00	0.033333333	0	0	0.0125	0.008333333	0	0.058333333	0.033333333	0.0875	0.175	0.025	0.025	0.2125
26/01/2003 13:00:00	0.033333333	0	0	0.0125	0.008333333	0	0.058333333	0.033333333	0.0875	0.175	0.025	0.025	0.2125
26/01/2003 14:00:00	0.033333333	0	0	0.0125	0.008333333	0	0.058333333	0.033333333	0.0875	0.175	0.025	0.025	0.2125
26/01/2003 15:00:00	0.033333333	0	0	0.0125	0.008333333	0	0.058333333	0.033333333	0.0875	0.175	0.025	0.025	0.2125
26/01/2003 16:00:00	0.033333333	0	0	0.0125	0.008333333	0	0.058333333	0.033333333	0.0875	0.175	0.025	0.025	0.2125
26/01/2003 17:00:00	0.033333333	0	0	0.0125	0.008333333	0	0.058333333	0.033333333	0.0875	0.175	0.025	0.025	0.2125
26/01/2003 18:00:00	0.033333333	0	0	0.0125	0.008333333	0	0.058333333	0.033333333	0.0875	0.175	0.025	0.025	0.2125
26/01/2003 19:00:00	0.033333333	0	0	0.0125	0.008333333	0	0.058333333	0.033333333	0.0875	0.175	0.025	0.025	0.2125
26/01/2003 20:00:00	0.033333333	0	0	0.0125	0.008333333	0	0.058333333	0.033333333	0.0875	0.175	0.025	0.025	0.2125
26/01/2003 21:00:00	0.033333333	0	0	0.0125	0.008333333	0	0.058333333	0.033333333	0.0875	0.175	0.025	0.025	0.2125
26/01/2003 22:00:00	0.033333333	0	0	0.0125	0.008333333	0	0.058333333	0.033333333	0.0875	0.175	0.025	0.025	0.2125
26/01/2003 23:00:00	0.033333333	0	0	0.0125	0.008333333	0	0.058333333	0.033333333	0.0875	0.175	0.025	0.025	0.2125
27/01/2003 00:00:00	0	0	0	0	0	0	0	0	0	0	0	0	0
27/01/2003 01:00:00	0	0	0	0	0	0	0	0	0	0	0	0	0
27/01/2003 02:00:00	0	0	0	0	0	0	0	0	0	0	0	0	0
27/01/2003 03:00:00	0	0	0	0	0	0	0	0	0	0	0	0	0
27/01/2003 04:00:00	0	0	0	0	0	0	0	0	0	0	0	0	0
27/01/2003 05:00:00	0	0	0	0	0	0	0	0	0	0	0	0	0
27/01/2003 06:00:00	0	0	0	0	0	0	0	0	0	0	0	0	0
27/01/2003 07:00:00	0	0	0	0	0	0	0	0	0	0	0	0	0
27/01/2003 08:00:00	0	0	0	0	0	0	0	0	0	0	0	0	0
27/01/2003 09:00:00	0	0	0	0	0	0	0	0	0	0	0	0	0
27/01/2003 10:00:00	0	0	0	0	0	0	0	0	0	0	0	0	0
27/01/2003 11:00:00	0	0	0	0	0	0	0	0	0	0	0	0	0
27/01/2003 12:00:00	0	0	0	0	0	0	0	0	0	0	0	0	0
27/01/2003 13:00:00	0	0	0	0	0	0	0	0	0	0	0	0	0
27/01/2003 14:00:00	0	0	0	0	0	0	0	0	0	0	0	0	0
27/01/2003 15:00:00	0	0	0	0	0	0	0	0	0	0	0	0	0
27/01/2003 16:00:00	0	0	0	0	0	0	0	0	0	0	0	0	0
27/01/2003 17:00:00	0	0	0	0	0	0	0	0	0	0	0	0	0
27/01/2003 18:00:00	0	0	0	0	0	0	0	0	0	0	0	0	0
27/01/2003 19:00:00	0	0	0	0	0	0	0	0	0	0	0	0	0
27/01/2003 20:00:00	0	0	0	0	0	0	0	0	0	0	0	0	0
27/01/2003 21:00:00	0	0	0	0	0	0	0	0	0	0	0	0	0
27/01/2003 22:00:00	0	0	0	0	0	0	0	0	0	0	0	0	0
27/01/2003 23:00:00	0	0	0	0	0	0	0	0	0	0	0	0	0
28/01/2003 00:00:00	0	0	0	0	0	0	0	0	0	0	0	0	0
28/01/2003 01:00:00	0	0	0	0	0	0	0	0	0	0	0	0	0
28/01/2003 02:00:00	0	0	0	0	0	0	0	0	0	0	0	0	0
28/01/2003 03:00:00	0	0	0	0	0	0	0	0	0	0	0	0	0
28/01/2003 04:00:00	0	0	0	0	0	0	0	0	0	0	0	0	0
28/01/2003 05:00:00	0	0	0	0	0	0	0	0	0	0	0	0	0
28/01/2003 06:00:00	0	0	0	0	0	0	0	0	0	0	0	0	0
28/01/2003 07:00:00	0	0	0	0	0	0	0	0	0	0	0	0	0
28/01/2003 08:00:00	0	0	0	0	0	0	0	0	0	0	0	0	0
28/01/2003 09:00:00	0	0	0	0	0	0	0	0	0	0	0	0	0
28/01/2003 10:00:00	0	0	0	0	0	0	0	0	0	0	0	0	0
28/01/2003 11:00:00	0	0	0	0	0	0	0	0	0	0	0	0	0
28/01/2003 12:00:00	0	0	0	0	0	0	0	0	0	0	0	0	0
28/01/2003 13:00:00	0	0	0	0	0	0	0	0	0	0	0	0	0
28/01/2003 14:00:00	0	0	0	0	0	0	0	0	0	0	0	0	0
28/01/2003 15:00:00	0	0	0	0	0	0	0	0	0	0	0	0	0
28/01/2003 16:00:00	0	0	0	0	0	0	0	0	0	0	0	0	0
28/01/2003 17:00:00	0	0	0	0	0	0	0	0	0	0	0	0	0
28/01/2003 18:00:00	0	0	0	0	0	0	0	0	0	0	0	0	0
28/01/2003 19:00:00	0	0	0	0	0	0	0	0	0	0	0	0	0
28/01/2003 20:00:00	0	0	0	0	0	0	0	0	0	0	0	0	0
28/01/2003 21:00:00	0	0	0	0	0	0	0	0	0	0	0	0	0
28/01/2003 22:00:00	0	0	0	0	0	0	0	0	0	0	0	0	0
28/01/2003 23:00:00	0	0	0	0	0	0	0	0	0	0	0	0	0
29/01/2003 00:00:00	0	0	0	0	0	0	0	0	0	0	0	0	0
29/01/2003 01:00:00	0	0	0	0	0	0	0	0	0	0	0	0	0
29/01/2003 02:00:00	0	0	0	0	0	0	0	0	0	0	0	0	0
29/01/2003 03:00:00	0	0	0	0	0	0	0	0	0	0	0	0	0
29/01/2003 04:00:00	0	0	0	0	0	0	0	0	0	0	0	0	0
29/01/2003 05:00:00	0	0	0	0	0	0	0	0	0	0	0	0	0
29/01/2003 06:00:00	0	0	0	0	0	0	0	0	0	0	0	0	0
29/01/2003 07:00:00	0	0	0	0	0	0	0	0	0	0	0	0	0
29/01/2003 08:00:00	0	0	0	0	0	0	0	0	0	0	0	0	0
29/01/2003 09:00:00	0	0	0	0	0	0	0	0	0	0	0	0	0
29/01/2003 10:00:00	0	0	0	0	0	0	0	0	0	0	0	0	0
29/01/2003 11:00:00	0	0	0	0	0	0	0	0	0	0	0	0	0
29/01/2003 12:00:00	0	0	0	0	0	0	0	0	0	0	0	0	0
29/01/2003 13:00:00	0	0	0	0	0	0	0	0	0	0	0	0	0
29/01/2003 14:00:00	0	0	0	0	0	0	0	0	0	0	0	0	0
29/01/2003 15:00:00	0	0	0	0	0	0	0	0	0	0	0	0	0
29/01/2003 16:00:00	0	0	0	0	0	0	0	0	0	0	0	0	0
29/01/2003 17:00:00	0	0	0	0	0	0	0	0	0	0	0	0	0
29/01/2003 18:00:00	0	0	0	0	0	0	0	0	0	0	0	0	0
29/01/2003 19:00:00	0	0	0	0	0	0	0	0	0	0	0	0	0
29/01/2003 20:00:00	0	0	0	0	0	0	0	0	0	0	0	0	0
29/01/2003 21:00:00	0	0	0	0	0	0	0	0	0	0	0	0	0
29/01/2003 22:00:00	0	0	0	0	0	0	0	0	0	0	0	0	0
29/01/2003 23:00:00	0	0	0	0	0	0	0	0	0	0	0	0	0
30/01/2003 00:00:00	0.0625	0.041666667	0.0125	0.045833333	0.125	0.008333333	0.258333333	0.308333333	0.2625	0.283333333	0.2875	0.279166667	0.554166667
30/01/2003 01:00:00	0.0625	0.041666667	0.0125	0.045833333	0.125	0.008333333	0.258333333	0.308333333	0.2625	0.283333333	0.2875	0.279166667	0.554166667
30/01/2003 02:00:00	0.0625	0.041666667	0.0125	0.045833333	0.125	0.008333333	0.258333333	0.308333333	0.2625	0.283333333	0.2875	0.279166667	0.554166667
30/01/2003 03:00:00	0.0625	0.041666667	0.0125	0.045833333	0.125	0.008333333	0.258333333	0.308333333	0.2625	0.283333333	0.2875	0.279166667	0.554166667
30/01/2003 04:00:00	0.0625	0.041666667	0.0125	0.045833333	0.125	0.008333333	0.258333333	0.308333333	0.2625	0.283333333	0.2875	0.279166667	0.554166667
30/01/2003 05:00:00	0.0625	0.041666667	0.0125	0.045833333	0.125	0.008333333	0.258333333	0.308333333	0.2625	0.283333333	0.2875	0.279166667	0.554166667
30/01/2003 06:00:00	0.0625	0.041666667	0.0125	0.045833333	0.125	0.008333333	0.258333333	0.308333333	0.2625	0.283333333	0.2875	0.279166667	0.554166667
30/01/2003 07:00:00	0.0625	0.041666667	0.0125	0.045833333	0.125	0.008333333	0.258333333	0.308333333	0.2625	0.283333333	0.2875	0.279166667	0.554166667
30/01/2003 08:00:00	0.0625	0.041666667	0.0125	0.045833333	0.125	0.008333333	0.258333333	0.308333333	0.2625	0.283333333	0.2875	0.279166667	0.554166667
30/01/2003 09:00:00	0.0625	0.041666667	0.0125	0.045833333	0.125	0.008333333	0.258333333	0.308333333	0.2625	0.283333333	0.2875	0.279166667	0.554166667
30/01/2003 10:00:00	0.0625	0.041666667	0.0125	0.045833333	0.125	0.008333333	0.258333333	0.308333333	0.2625	0.283333333	0.2875	0.279166667	0.554166667
30/01/2003 11:00:00	0.0625	0.041666667	0.0125	0.045833333	0.125	0.008333333	0.258333333	0.308333333	0.2625	0.283333333	0.2875	0.279166667	0.554166667
30/01/2003 12:00:00	0.0625	0.041666667	0.0125	0.045833333	0.125	0.008333333	0.258333333	0.308333333	0.2625	0.283333333	0.2875	0.279166667	0.554166667
30/01/2003 13:00:00	0.0625	0.041666667	0.0125	0.045833333	0.125	0.008333333	0.258333333	0.308333333	0.2625	0.283333333	0.2875	0.279166667	0.554166667
30/01/2003 14:00:00	0.0625	0.041666667	0.0125	0.045833333	0.125	0.008333333	0.258333333	0.308333333	0.2625	0.283333333	0.2875	0.279166667	0.554166667
30/01/2003 15:00:00	0.0625	0.041666667	0.0125	0.045833333	0.125	0.008333333	0.258333333	0.308333333	0.2625	0.283333333	0.2875	0.279166667	0.554166667
30/01/2003 16:00:00	0.0625	0.041666667	0.0125	0.045833333	0.125	0.008333333	0.258333333	0.308333333	0.2625	0.283333333	0.2875	0.279166667	0.554166667
30/01/2003 17:00:00	0.0625	0.041666667	0.0125	0.045833333	0.125	0.008333333	0.258333333	0.308333333	0.2625	0.283333333	0.2875	0.279166667	0.554166667
30/01/2003 18:00:00	0.0625	0.041666667	0.0125	0.045833333	0.125	0.008333333	0.258333333	0.308333333	0.2625	0.283333333	0.2875	0.279166667	0.554166667
30/01/2003 19:00:00	0.0625	0.041666667	0.0125	0.045833333	0.125	0.008333333	0.258333333	0.308333333	0.2625	0.283333333	0.2875	0.279166667	0.554166667
30/01/2003 20:00:00	0.0625	0.041666667	0.0125	0.045833333	0.125	0.008333333	0.258333333	0.308333333	0.2625	0.283333333	0.2875	0.279166667	0.554166667
30/01/2003 21:00:00	0.0625	0.041666667	0.0125	0.045833333	0.125	0.008333333	0.258333333	0.308333333	0.2625	0.283333333	0.2875	0.279166667	0.554166667
30/01/2003 22:00:00	0.0625	0.041666667	0.0125	0.045833333	0.125	0.008333333	0.258333333	0.308333333	0.2625	0.283333333	0.2875	0.279166667	0.554166667
30/01/2003 23:00:00	0.0625	0.041666667	0.0125	0.045833333	0.125	0.008333333	0.258333333	0.308333333	0.2625	0.283333333	0.2875	0.279166667	0.554166667
31/01/2003 00:00:00	0.020833333	0.0125	0.029166667	0.033333333	0.033333333	0.095833333	0	0.020833333	0.0125	0.020833333	0.029166667	0.016666667	0.075
31/01/2003 01:00:00	0.020833333	0.0125	0.029166667	0.033333333	0.033333333	0.095833333	0	0.020833333	0.0125	0.020833333	0.029166667	0.016666667	0.075
31/01/2003 02:00:00	0.020833333	0.0125	0.029166667	0.033333333	0.033333333	0.095833333	0	0.020833333	0.0125	0.020833333	0.029166667	0.016666667	0.075
31/01/2003 03:00:00	0.020833333	0.0125	0.029166667	0.033333333	0.033333333	0.095833333	0	0.020833333	0.0125	0.020833333	0.029166667	0.016666667	0.075
31/01/2003 04:00:00	0.020833333	0.0125	0.029166667	0.033333333	0.033333333	0.095833333	0	0.020833333	0.0125	0.020833333	0.029166667	0.016666667	0.075
31/01/2003 05:00:00	0.020833333	0.0125	0.029166667	0.033333333	0.033333333	0.095833333	0	0.020833333	0.0125	0.020833333	0.029166667	0.016666667	0.075
31/01/2003 06:00:00	0.020833333	0.0125	0.029166667	0.033333333	0.033333333	0.095833333	0	0.020833333	0.0125	0.020833333	0.029166667	0.016666667	0.075
31/01/2003 07:00:00	0.020833333	0.0125	0.029166667	0.033333333	0.033333333	0.095833333	0	0.020833333	0.0125	0.020833333	0.029166667	0.016666667	0.075
31/01/2003 08:00:00	0.020833333	0.0125	0.029166667	0.033333333	0.033333333	0.095833333	0	0.020833333	0.0125	0.020833333	0.029166667	0.016666667	0.075
31/01/2003 09:00:00	0.020833333	0.0125	0.029166667	0.033333333	0.033333333	0.095833333	0	0.020833333	0.0125	0.020833333	0.029166667	0.016666667	0.075
31/01/2003 10:00:00	0.020833333	0.0125	0.029166667	0.033333333	0.033333333	0.095833333	0	0.020833333	0.0125	0.020833333	0.029166667	0.016666667	0.075
31/01/2003 11:00:00	0.020833333	0.0125	0.029166667	0.033333333	0.033333333	0.095833333	0	0.020833333	0.0125	0.020833333	0.029166667	0.016666667	0.075
31/01/2003 12:00:00	0.020833333	0.0125	0.029166667	0.033333333	0.033333333	0.095833333	0	0.020833333	0.0125	0.020833333	0.029166667	0.016666667	0.075
31/01/2003 13:00:00	0.020833333	0.0125	0.029166667	0.033333333	0.033333333	0.095833333	0	0.020833333	0.0125	0.020833333	0.029166667	0.016666667	0.075
31/01/2003 14:00:00	0.020833333	0.0125	0.029166667	0.033333333	0.033333333	0.095833333	0	0.020833333	0.0125	0.020833333	0.029166667	0.016666667	0.075
31/01/2003 15:00:00	0.020833333	0.0125	0.029166667	0.033333333	0.033333333	0.095833333	0	0.020833333	0.0125	0.020833333	0.029166667	0.016666667	0.075
31/01/2003 16:00:00	0.020833333	0.0125	0.029166667	0.033333333	0.033333333	0.095833333	0	0.020833333	0.0125	0.020833333	0.029166667	0.016666667	0.075
31/01/2003 17:00:00	0.020833333	0.0125	0.029166667	0.033333333	0.033333333	0.095833333	0	0.020833333	0.0125	0.020833333	0.029166667	0.016666667	0.075
31/01/2003 18:00:00	0.020833333	0.0125	0.029166667	0.033333333	0.033333333	0.095833333	0	0.020833333	0.0125	0.020833333	0.029166667	0.016666667	0.075
31/01/2003 19:00:00	0.020833333	0.0125	0.029166667	0.033333333	0.033333333	0.095833333	0	0.020833333	0.0125	0.020833333	0.029166667	0.016666667	0.075
31/01/2003 20:00:00	0.020833333	0.0125	0.029166667	0.033333333	0.033333333	0.095833333	0	0.020833333	0.0125	0.020833333	0.029166667	0.016666667	0.075
31/01/2003 21:00:00	0.020833333	0.0125	0.029166667	0.033333333	0.033333333	0.095833333	0	0.020833333	0.0125	0.020833333	0.029166667	0.016666667	0.075
31/01/2003 22:00:00	0.020833333	0.0125	0.029166667	0.033333333	0.033333333	0.095833333	0	0.020833333	0.0125	0.020833333	0.029166667	0.016666667	0.075
31/01/2003 23:00:00	0.020833333	0.0125	0.029166667	0.033333333	0.033333333	0.095833333	0	0.020833333	0.0125	0.020833333	0.029166667	0.016666667	0.075
01/02/2003 00:00:00	0	0	0	0	0	0	0	0	0	0	0	0	0
01/02/2003 01:00:00	0	0	0	0	0	0	0	0	0	0	0	0	0
01/02/2003 02:00:00	0	0	0	0	0	0	0	0	0	0	0	0	0
01/02/2003 03:00:00	0	0	0	0	0	0	0	0	0	0	0	0	0
01/02/2003 04:00:00	0	0	0	0	0	0	0	0	0	0	0	0	0
01/02/2003 05:00:00	0	0	0	0	0	0	0	0	0	0	0	0	0
01/02/2003 06:00:00	0	0	0	0	0	0	0	0	0	0	0	0	0
01/02/2003 07:00:00	0	0	0	0	0	0	0	0	0	0	0	0	0
01/02/2003 08:00:00	0	0	0	0	0	0	0	0	0	0	0	0	0
01/02/2003 09:00:00	0	0	0	0	0	0	0	0	0	0	0	0	0
01/02/2003 10:00:00	0	0	0	0	0	0	0	0	0	0	0	0	0
01/02/2003 11:00:00	0	0	0	0	0	0	0	0	0	0	0	0	0
01/02/2003 12:00:00	0	0	0	0	0	0	0	0	0	0	0	0	0
01/02/2003 13:00:00	0	0	0	0	0	0	0	0	0	0	0	0	0
01/02/2003 14:00:00	0	0	0	0	0	0	0	0	0	0	0	0	0
01/02/2003 15:00:00	0	0	0	0	0	0	0	0	0	0	0	0	0
01/02/2003 16:00:00	0	0	0	0	0	0	0	0	0	0	0	0	0
01/02/2003 17:00:00	0	0	0	0	0	0	0	0	0	0	0	0	0
01/02/2003 18:00:00	0	0	0	0	0	0	0	0	0	0	0	0	0
01/02/2003 19:00:00	0	0	0	0	0	0	0	0	0	0	0	0	0
01/02/2003 20:00:00	0	0	0	0	0	0	0	0	0	0	0	0	0
01/02/2003 21:00:00	0	0	0	0	0	0	0	0	0	0	0	0	0
01/02/2003 22:00:00	0	0	0	0	0	0	0	0	0	0	0	0	0
01/02/2003 23:00:00	0	0	0	0	0	0	0	0	0	0	0	0	0
02/02/2003 00:00:00	0	0	0	0	0	0	0	0	0	0	0	0	0
02/02/2003 01:00:00	0	0	0	0	0	0	0	0	0	0	0	0	0
02/02/2003 02:00:00	0	0	0	0	0	0	0	0	0	0	0	0	0
02/02/2003 03:00:00	0	0	0	0	0	0	0	0	0	0	0	0	0
02/02/2003 04:00:00	0	0	0	0	0	0	0	0	0	0	0	0	0
02/02/2003 05:00:00	0	0	0	0	0	0	0	0	0	0	0	0	0
02/02/2003 06:00:00	0	0	0	0	0	0	0	0	0	0	0	0	0
02/02/2003 07:00:00	0	0	0	0	0	0	0	0	0	0	0	0	0
02/02/2003 08:00:00	0	0	0	0	0	0	0	0	0	0	0	0	0
02/02/2003 09:00:00	0	0	0	0	0	0	0	0	0	0	0	0	0
02/02/2003 10:00:00	0	0	0	0	0	0	0	0	0	0	0	0	0
02/02/2003 11:00:00	0	0	0	0	0	0	0	0	0	0	0	0	0
02/02/2003 12:00:00	0	0	0	0	0	0	0	0	0	0	0	0	0
02/02/2003 13:00:00	0	0	0	0	0	0	0	0	0	0	0	0	0
02/02/2003 14:00:00	0	0	0	0	0	0	0	0	0	0	0	0	0
02/02/2003 15:00:00	0	0	0	0	0	0	0	0	0	0	0	0	0
02/02/2003 16:00:00	0	0	0	0	0	0	0	0	0	0	0	0	0
02/02/2003 17:00:00	0	0	0	0	0	0	0	0	0	0	0	0	0
02/02/2003 18:00:00	0	0	0	0	0	0	0	0	0	0	0	0	0
02/02/2003 19:00:00	0	0	0	0	0	0	0	0	0	0	0	0	0
02/02/2003 20:00:00	0	0	0	0	0	0	0	0	0	0	0	0	0
02/02/2003 21:00:00	0	0	0	0	0	0	0	0	0	0	0	0	0
02/02/2003 22:00:00	0	0	0	0	0	0	0	0	0	0	0	0	0
02/02/2003 23:00:00	0	0	0	0	0	0	0	0	0	0	0	0	0
03/02/2003 00:00:00	0	0	0	0	0	0	0	0	0	0	0	0	0
03/02/2003 01:00:00	0	0	0	0	0	0	0	0	0	0	0	0	0
03/02/2003 02:00:00	0	0	0	0	0	0	0	0	0	0	0	0	0
03/02/2003 03:00:00	0	0	0	0	0	0	0	0	0	0	0	0	0
03/02/2003 04:00:00	0	0	0	0	0	0	0	0	0	0	0	0	0
03/02/2003 05:00:00	0	0	0	0	0	0	0	0	0	0	0	0	0
03/02/2003 06:00:00	0	0	0	0	0	0	0	0	0	0	0	0	0
03/02/2003 07:00:00	0	0	0	0	0	0	0	0	0	0	0	0	0
03/02/2003 08:00:00	0	0	0	0	0	0	0	0	0	0	0	0	0
03/02/2003 09:00:00	0	0	0	0	0	0	0	0	0	0	0	0	0
03/02/2003 10:00:00	0	0	0	0	0	0	0	0	0	0	0	0	0
03/02/2003 11:00:00	0	0	0	0	0	0	0	0	0	0	0	0	0
03/02/2003 12:00:00	0	0	0	0	0	0	0	0	0	0	0	0	0
03/02/2003 13:00:00	0	0	0	0	0	0	0	0	0	0	0	0	0
03/02/2003 14:00:00	0	0	0	0	0	0	0	0	0	0	0	0	0
03/02/2003 15:00:00	0	0	0	0	0	0	0	0	0	0	0	0	0
03/02/2003 16:00:00	0	0	0	0	0	0	0	0	0	0	0	0	0
03/02/2003 17:00:00	0	0	0	0	0	0	0	0	0	0	0	0	0
03/02/2003 18:00:00	0	0	0	0	0	0	0	0	0	0	0	0	0
03/02/2003 19:00:00	0	0	0	0	0	0	0	0	0	0	0	0	0
03/02/2003 20:00:00	0	0	0	0	0	0	0	0	0	0	0	0	0
03/02/2003 21:00:00	0	0	0	0	0	0	0	0	0	0	0	0	0
03/02/2003 22:00:00	0	0	0	0	0	0	0	0	0	0	0	0	0
03/02/2003 23:00:00	0	0	0	0	0	0	0	0	0	0	0	0	0
04/02/2003 00:00:00	0	0	0	0	0	0	0	0	0	0	0	0	0
04/02/2003 01:00:00	0	0	0	0	0	0	0	0	0	0	0	0	0
04/02/2003 02:00:00	0	0	0	0	0	0	0	0	0	0	0	0	0
04/02/2003 03:00:00	0	0	0	0	0	0	0	0	0	0	0	0	0
04/02/2003 04:00:00	0	0	0	0	0	0	0	0	0	0	0	0	0
04/02/2003 05:00:00	0	0	0	0	0	0	0	0	0	0	0	0	0
04/02/2003 06:00:00	0	0	0	0	0	0	0	0	0	0	0	0	0
04/02/2003 07:00:00	0	0	0	0	0	0	0	0	0	0	0	0	0
04/02/2003 08:00:00	0	0	0	0	0	0	0	0	0	0	0	0	0
04/02/2003 09:00:00	0	0	0	0	0	0	0	0	0	0	0	0	0
04/02/2003 10:00:00	0	0	0	0	0	0	0	0	0	0	0	0	0
04/02/2003 11:00:00	0	0	0	0	0	0	0	0	0	0	0	0	0
04/02/2003 12:00:00	0	0	0	0	0	0	0	0	0	0	0	0	0
04/02/2003 13:00:00	0	0	0	0	0	0	0	0	0	0	0	0	0
04/02/2003 14:00:00	0	0	0	0	0	0	0	0	0	0	0	0	0
04/02/2003 15:00:00	0	0	0	0	0	0	0	0	0	0	0	0	0
04/02/2003 16:00:00	0	0	0	0	0	0	0	0	0	0	0	0	0
04/02/2003 17:00:00	0	0	0	0	0	0	0	0	0	0	0	0	0
04/02/2003 18:00:00	0	0	0	0	0	0	0	0	0	0	0	0	0
04/02/2003 19:00:00	0	0	0	0	0	0	0	0	0	0	0	0	0
04/02/2003 20:00:00	0	0	0	0	0	0	0	0	0	0	0	0	0
04/02/2003 21:00:00	0	0	0	0	0	0	0	0	0	0	0	0	0
04/02/2003 22:00:00	0	0	0	0	0	0	0	0	0	0	0	0	0
04/02/2003 23:00:00	0	0	0	0	0	0	0	0	0	0	0	0	0
05/02/2003 00:00:00	0	0	0	0	0	0	0	0	0	0	0	0	0
05/02/2003 01:00:00	0	0	0	0	0	0	0	0	0	0	0	0	0
05/02/2003 02:00:00	0	0	0	0	0	0	0	0	0	0	0	0	0
05/02/2003 03:00:00	0	0	0	0	0	0	0	0	0	0	0	0	0
05/02/2003 04:00:00	0	0	0	0	0	0	0	0	0	0	0	0	0
05/02/2003 05:00:00	0	0	0	0	0	0	0	0	0	0	0	0	0
05/02/2003 06:00:00	0	0	0	0	0	0	0	0	0	0	0	0	0
05/02/2003 07:00:00	0	0	0	0	0	0	0	0	0	0	0	0	0
05/02/2003 08:00:00	0	0	0	0	0	0	0	0	0	0	0	0	0
05/02/2003 09:00:00	0	0	0	0	0	0	0	0	0	0	0	0	0
05/02/2003 10:00:00	0	0	0	0	0	0	0	0	0	0	0	0	0
05/02/2003 11:00:00	0	0	0	0	0	0	0	0	0	0	0	0	0
05/02/2003 12:00:00	0	0	0	0	0	0	0	0	0	0	0	0	0
05/02/2003 13:00:00	0	0	0	0	0	0	0	0	0	0	0	0	0
05/02/2003 14:00:00	0	0	0	0	0	0	0	0	0	0	0	0	0
05/02/2003 15:00:00	0	0	0	0	0	0	0	0	0	0	0	0	0
05/02/2003 16:00:00	0	0	0	0	0	0	0	0	0	0	0	0	0
05/02/2003 17:00:00	0	0	0	0	0	0	0	0	0	0	0	0	0
05/02/2003 18:00:00	0	0	0	0	0	0	0	0	0	0	0	0	0
05/02/2003 19:00:00	0	0	0	0	0	0	0	0	0	0	0	0	0
05/02/2003 20:00:00	0	0	0	0	0	0	0	0	0	0	0	0	0
05/02/2003 21:00:00	0	0	0	0	0	0	0	0	0	0	0	0	0
05/02/2003 22:00:00	0	0	0	0	0	0	0	0	0	0	0	0	0
05/02/2003 23:00:00	0	0	0	0	0	0	0	0	0	0	0	0	0
06/02/2003 00:00:00	0	0	0	0	0	0	0	0	0	0	0	0	0
06/02/2003 01:00:00	0	0	0	0	0	0	0	0	0	0	0	0	0
06/02/2003 02:00:00	0	0	0	0	0	0	0	0	0	0	0	0	0
06/02/2003 03:00:00	0	0	0	0	0	0	0	0	0	0	0	0	0
06/02/2003 04:00:00	0	0	0	0	0	0	0	0	0	0	0	0	0
06/02/2003 05:00:00	0	0	0	0	0	0	0	0	0	0	0	0	0
06/02/2003 06:00:00	0	0	0	0	0	0	0	0	0	0	0	0	0
06/02/2003 07:00:00	0	0	0	0	0	0	0	0	0	0	0	0	0
06/02/2003 08:00:00	0	0	0	0	0	0	0	0	0	0	0	0	0
06/02/2003 09:00:00	0	0	0	0	0	0	0	0	0	0	0	0	0
06/02/2003 10:00:00	0	0	0	0	0	0	0	0	0	0	0	0	0
06/02/2003 11:00:00	0	0	0	0	0	0	0	0	0	0	0	0	0
06/02/2003 12:00:00	0	0	0	0	0	0	0	0	0	0	0	0	0
06/02/2003 13:00:00	0	0	0	0	0	0	0	0	0	0	0	0	0
06/02/2003 14:00:00	0	0	0	0	0	0	0	0	0	0	0	0	0
06/02/2003 15:00:00	0	0	0	0	0	0	0	0	0	0	0	0	0
06/02/2003 16:00:00	0	0	0	0	0	0	0	0	0	0	0	0	0
06/02/2003 17:00:00	0	0	0	0	0	0	0	0	0	0	0	0	0
06/02/2003 18:00:00	0	0	0	0	0	0	0	0	0	0	0	0	0
06/02/2003 19:00:00	0	0	0	0	0	0	0	0	0	0	0	0	0
06/02/2003 20:00:00	0	0	0	0	0	0	0	0	0	0	0	0	0
06/02/2003 21:00:00	0	0	0	0	0	0	0	0	0	0	0	0	0
06/02/2003 22:00:00	0	0	0	0	0	0	0	0	0	0	0	0	0
06/02/2003 23:00:00	0	0	0	0	0	0	0	0	0	0	0	0	0
07/02/2003 00:00:00	0.020833333	0	0	0.029166667	0.075	0	0.0375	0.095833333	0.020833333	0.016666667	0.308333333	0.120833333	0.095833333
07/02/2003 01:00:00	0.020833333	0	0	0.029166667	0.075	0	0.0375	0.095833333	0.020833333	0.016666667	0.308333333	0.120833333	0.095833333
07/02/2003 02:00:00	0.020833333	0	0	0.029166667	0.075	0	0.0375	0.095833333	0.020833333	0.016666667	0.308333333	0.120833333	0.095833333
07/02/2003 03:00:00	0.020833333	0	0	0.029166667	0.075	0	0.0375	0.095833333	0.020833333	0.016666667	0.308333333	0.120833333	0.095833333
07/02/2003 04:00:00	0.020833333	0	0	0.029166667	0.075	0	0.0375	0.095833333	0.020833333	0.016666667	0.308333333	0.120833333	0.095833333
07/02/2003 05:00:00	0.020833333	0	0	0.029166667	0.075	0	0.0375	0.095833333	0.020833333	0.016666667	0.308333333	0.120833333	0.095833333
07/02/2003 06:00:00	0.020833333	0	0	0.029166667	0.075	0	0.0375	0.095833333	0.020833333	0.016666667	0.308333333	0.120833333	0.095833333
07/02/2003 07:00:00	0.020833333	0	0	0.029166667	0.075	0	0.0375	0.095833333	0.020833333	0.016666667	0.308333333	0.120833333	0.095833333
07/02/2003 08:00:00	0.020833333	0	0	0.029166667	0.075	0	0.0375	0.095833333	0.020833333	0.016666667	0.308333333	0.120833333	0.095833333
07/02/2003 09:00:00	0.020833333	0	0	0.029166667	0.075	0	0.0375	0.095833333	0.020833333	0.016666667	0.308333333	0.120833333	0.095833333
07/02/2003 10:00:00	0.020833333	0	0	0.029166667	0.075	0	0.0375	0.095833333	0.020833333	0.016666667	0.308333333	0.120833333	0.095833333
07/02/2003 11:00:00	0.020833333	0	0	0.029166667	0.075	0	0.0375	0.095833333	0.020833333	0.016666667	0.308333333	0.120833333	0.095833333
07/02/2003 12:00:00	0.020833333	0	0	0.029166667	0.075	0	0.0375	0.095833333	0.020833333	0.016666667	0.308333333	0.120833333	0.095833333
07/02/2003 13:00:00	0.020833333	0	0	0.029166667	0.075	0	0.0375	0.095833333	0.020833333	0.016666667	0.308333333	0.120833333	0.095833333
07/02/2003 14:00:00	0.020833333	0	0	0.029166667	0.075	0	0.0375	0.095833333	0.020833333	0.016666667	0.308333333	0.120833333	0.095833333
07/02/2003 15:00:00	0.020833333	0	0	0.029166667	0.075	0	0.0375	0.095833333	0.020833333	0.016666667	0.308333333	0.120833333	0.095833333
07/02/2003 16:00:00	0.020833333	0	0	0.029166667	0.075	0	0.0375	0.095833333	0.020833333	0.016666667	0.308333333	0.120833333	0.095833333
07/02/2003 17:00:00	0.020833333	0	0	0.029166667	0.075	0	0.0375	0.095833333	0.020833333	0.016666667	0.308333333	0.120833333	0.095833333
07/02/2003 18:00:00	0.020833333	0	0	0.029166667	0.075	0	0.0375	0.095833333	0.020833333	0.016666667	0.308333333	0.120833333	0.095833333
07/02/2003 19:00:00	0.020833333	0	0	0.029166667	0.075	0	0.0375	0.095833333	0.020833333	0.016666667	0.308333333	0.120833333	0.095833333
07/02/2003 20:00:00	0.020833333	0	0	0.029166667	0.075	0	0.0375	0.095833333	0.020833333	0.016666667	0.308333333	0.120833333	0.095833333
07/02/2003 21:00:00	0.020833333	0	0	0.029166667	0.075	0	0.0375	0.095833333	0.020833333	0.016666667	0.308333333	0.120833333	0.095833333
07/02/2003 22:00:00	0.020833333	0	0	0.029166667	0.075	0	0.0375	0.095833333	0.020833333	0.016666667	0.308333333	0.120833333	0.095833333
07/02/2003 23:00:00	0.020833333	0	0	0.029166667	0.075	0	0.0375	0.095833333	0.020833333	0.016666667	0.308333333	0.120833333	0.095833333
08/02/2003 00:00:00	0.875	0.054166667	0.05	0.108333333	0.1625	0.3125	0.066666667	0.1875	0.145833333	0.175	0	0.004166667	0.041666667
08/02/2003 01:00:00	0.875	0.054166667	0.05	0.108333333	0.1625	0.3125	0.066666667	0.1875	0.145833333	0.175	0	0.004166667	0.041666667
08/02/2003 02:00:00	0.875	0.054166667	0.05	0.108333333	0.1625	0.3125	0.066666667	0.1875	0.145833333	0.175	0	0.004166667	0.041666667
08/02/2003 03:00:00	0.875	0.054166667	0.05	0.108333333	0.1625	0.3125	0.066666667	0.1875	0.145833333	0.175	0	0.004166667	0.041666667
08/02/2003 04:00:00	0.875	0.054166667	0.05	0.108333333	0.1625	0.3125	0.066666667	0.1875	0.145833333	0.175	0	0.004166667	0.041666667
08/02/2003 05:00:00	0.875	0.054166667	0.05	0.108333333	0.1625	0.3125	0.066666667	0.1875	0.145833333	0.175	0	0.004166667	0.041666667
08/02/2003 06:00:00	0.875	0.054166667	0.05	0.108333333	0.1625	0.3125	0.066666667	0.1875	0.145833333	0.175	0	0.004166667	0.041666667
08/02/2003 07:00:00	0.875	0.054166667	0.05	0.108333333	0.1625	0.3125	0.066666667	0.1875	0.145833333	0.175	0	0.004166667	0.041666667
08/02/2003 08:00:00	0.875	0.054166667	0.05	0.108333333	0.1625	0.3125	0.066666667	0.1875	0.145833333	0.175	0	0.004166667	0.041666667
08/02/2003 09:00:00	0.875	0.054166667	0.05	0.108333333	0.1625	0.3125	0.066666667	0.1875	0.145833333	0.175	0	0.004166667	0.041666667
08/02/2003 10:00:00	0.875	0.054166667	0.05	0.108333333	0.1625	0.3125	0.066666667	0.1875	0.145833333	0.175	0	0.004166667	0.041666667
08/02/2003 11:00:00	0.875	0.054166667	0.05	0.108333333	0.1625	0.3125	0.066666667	0.1875	0.145833333	0.175	0	0.004166667	0.041666667
08/02/2003 12:00:00	0.875	0.054166667	0.05	0.108333333	0.1625	0.3125	0.066666667	0.1875	0.145833333	0.175	0	0.004166667	0.041666667
08/02/2003 13:00:00	0.875	0.054166667	0.05	0.108333333	0.1625	0.3125	0.066666667	0.1875	0.145833333	0.175	0	0.004166667	0.041666667
08/02/2003 14:00:00	0.875	0.054166667	0.05	0.108333333	0.1625	0.3125	0.066666667	0.1875	0.145833333	0.175	0	0.004166667	0.041666667
08/02/2003 15:00:00	0.875	0.054166667	0.05	0.108333333	0.1625	0.3125	0.066666667	0.1875	0.145833333	0.175	0	0.004166667	0.041666667
08/02/2003 16:00:00	0.875	0.054166667	0.05	0.108333333	0.1625	0.3125	0.066666667	0.1875	0.145833333	0.175	0	0.004166667	0.041666667
08/02/2003 17:00:00	0.875	0.054166667	0.05	0.108333333	0.1625	0.3125	0.066666667	0.1875	0.145833333	0.175	0	0.004166667	0.041666667
08/02/2003 18:00:00	0.875	0.054166667	0.05	0.108333333	0.1625	0.3125	0.066666667	0.1875	0.145833333	0.175	0	0.004166667	0.041666667
08/02/2003 19:00:00	0.875	0.054166667	0.05	0.108333333	0.1625	0.3125	0.066666667	0.1875	0.145833333	0.175	0	0.004166667	0.041666667
08/02/2003 20:00:00	0.875	0.054166667	0.05	0.108333333	0.1625	0.3125	0.066666667	0.1875	0.145833333	0.175	0	0.004166667	0.041666667
08/02/2003 21:00:00	0.875	0.054166667	0.05	0.108333333	0.1625	0.3125	0.066666667	0.1875	0.145833333	0.175	0	0.004166667	0.041666667
08/02/2003 22:00:00	0.875	0.054166667	0.05	0.108333333	0.1625	0.3125	0.066666667	0.1875	0.145833333	0.175	0	0.004166667	0.041666667
08/02/2003 23:00:00	0.875	0.054166667	0.05	0.108333333	0.1625	0.3125	0.066666667	0.1875	0.145833333	0.175	0	0.004166667	0.041666667
09/02/2003 00:00:00	0.566666667	0.341666667	0.3375	0.804166667	0.741666667	0.541666667	0.741666667	0.883333333	0.966666667	1.020833333	1.2125	0.820833333	1.308333333
09/02/2003 01:00:00	0.566666667	0.341666667	0.3375	0.804166667	0.741666667	0.541666667	0.741666667	0.883333333	0.966666667	1.020833333	1.2125	0.820833333	1.308333333
09/02/2003 02:00:00	0.566666667	0.341666667	0.3375	0.804166667	0.741666667	0.541666667	0.741666667	0.883333333	0.966666667	1.020833333	1.2125	0.820833333	1.308333333
09/02/2003 03:00:00	0.566666667	0.341666667	0.3375	0.804166667	0.741666667	0.541666667	0.741666667	0.883333333	0.966666667	1.020833333	1.2125	0.820833333	1.308333333
09/02/2003 04:00:00	0.566666667	0.341666667	0.3375	0.804166667	0.741666667	0.541666667	0.741666667	0.883333333	0.966666667	1.020833333	1.2125	0.820833333	1.308333333
09/02/2003 05:00:00	0.566666667	0.341666667	0.3375	0.804166667	0.741666667	0.541666667	0.741666667	0.883333333	0.966666667	1.020833333	1.2125	0.820833333	1.308333333
09/02/2003 06:00:00	0.566666667	0.341666667	0.3375	0.804166667	0.741666667	0.541666667	0.741666667	0.883333333	0.966666667	1.020833333	1.2125	0.820833333	1.308333333
09/02/2003 07:00:00	0.566666667	0.341666667	0.3375	0.804166667	0.741666667	0.541666667	0.741666667	0.883333333	0.966666667	1.020833333	1.2125	0.820833333	1.308333333
09/02/2003 08:00:00	0.566666667	0.341666667	0.3375	0.804166667	0.741666667	0.541666667	0.741666667	0.883333333	0.966666667	1.020833333	1.2125	0.820833333	1.308333333
09/02/2003 09:00:00	0.566666667	0.341666667	0.3375	0.804166667	0.741666667	0.541666667	0.741666667	0.883333333	0.966666667	1.020833333	1.2125	0.820833333	1.308333333
09/02/2003 10:00:00	0.566666667	0.341666667	0.3375	0.804166667	0.741666667	0.541666667	0.741666667	0.883333333	0.966666667	1.020833333	1.2125	0.820833333	1.308333333
09/02/2003 11:00:00	0.566666667	0.341666667	0.3375	0.804166667	0.741666667	0.541666667	0.741666667	0.883333333	0.966666667	1.020833333	1.2125	0.820833333	1.308333333
09/02/2003 12:00:00	0.566666667	0.341666667	0.3375	0.804166667	0.741666667	0.541666667	0.741666667	0.883333333	0.966666667	1.020833333	1.2125	0.820833333	1.308333333
09/02/2003 13:00:00	0.566666667	0.341666667	0.3375	0.804166667	0.741666667	0.541666667	0.741666667	0.883333333	0.966666667	1.020833333	1.2125	0.820833333	1.308333333
09/02/2003 14:00:00	0.566666667	0.341666667	0.3375	0.804166667	0.741666667	0.541666667	0.741666667	0.883333333	0.966666667	1.020833333	1.2125	0.820833333	1.308333333
09/02/2003 15:00:00	0.566666667	0.341666667	0.3375	0.804166667	0.741666667	0.541666667	0.741666667	0.883333333	0.966666667	1.020833333	1.2125	0.820833333	1.308333333
09/02/2003 16:00:00	0.566666667	0.341666667	0.3375	0.804166667	0.741666667	0.541666667	0.741666667	0.883333333	0.966666667	1.020833333	1.2125	0.820833333	1.308333333
09/02/2003 17:00:00	0.566666667	0.341666667	0.3375	0.804166667	0.741666667	0.541666667	0.741666667	0.883333333	0.966666667	1.020833333	1.2125	0.820833333	1.308333333
09/02/2003 18:00:00	0.566666667	0.341666667	0.3375	0.804166667	0.741666667	0.541666667	0.741666667	0.883333333	0.966666667	1.020833333	1.2125	0.820833333	1.308333333
09/02/2003 19:00:00	0.566666667	0.341666667	0.3375	0.804166667	0.741666667	0.541666667	0.741666667	0.883333333	0.966666667	1.020833333	1.2125	0.820833333	1.308333333
09/02/2003 20:00:00	0.566666667	0.341666667	0.3375	0.804166667	0.741666667	0.541666667	0.741666667	0.883333333	0.966666667	1.020833333	1.2125	0.820833333	1.308333333
09/02/2003 21:00:00	0.566666667	0.341666667	0.3375	0.804166667	0.741666667	0.541666667	0.741666667	0.883333333	0.966666667	1.020833333	1.2125	0.820833333	1.308333333
09/02/2003 22:00:00	0.566666667	0.341666667	0.3375	0.804166667	0.741666667	0.541666667	0.741666667	0.883333333	0.966666667	1.020833333	1.2125	0.820833333	1.308333333
09/02/2003 23:00:00	0.566666667	0.341666667	0.3375	0.804166667	0.741666667	0.541666667	0.741666667	0.883333333	0.966666667	1.020833333	1.2125	0.820833333	1.308333333
10/02/2003 00:00:00	0.1	0.3625	0.129166667	0.504166667	0.408333333	0.458333333	0.7375	0.95	0.8	0.825	0.6125	0.841666667	0.5875
10/02/2003 01:00:00	0.1	0.3625	0.129166667	0.504166667	0.408333333	0.458333333	0.7375	0.95	0.8	0.825	0.6125	0.841666667	0.5875
10/02/2003 02:00:00	0.1	0.3625	0.129166667	0.504166667	0.408333333	0.458333333	0.7375	0.95	0.8	0.825	0.6125	0.841666667	0.5875
10/02/2003 03:00:00	0.1	0.3625	0.129166667	0.504166667	0.408333333	0.458333333	0.7375	0.95	0.8	0.825	0.6125	0.841666667	0.5875
10/02/2003 04:00:00	0.1	0.3625	0.129166667	0.504166667	0.408333333	0.458333333	0.7375	0.95	0.8	0.825	0.6125	0.841666667	0.5875
10/02/2003 05:00:00	0.1	0.3625	0.129166667	0.504166667	0.408333333	0.458333333	0.7375	0.95	0.8	0.825	0.6125	0.841666667	0.5875
10/02/2003 06:00:00	0.1	0.3625	0.129166667	0.504166667	0.408333333	0.458333333	0.7375	0.95	0.8	0.825	0.6125	0.841666667	0.5875
10/02/2003 07:00:00	0.1	0.3625	0.129166667	0.504166667	0.408333333	0.458333333	0.7375	0.95	0.8	0.825	0.6125	0.841666667	0.5875
10/02/2003 08:00:00	0.1	0.3625	0.129166667	0.504166667	0.408333333	0.458333333	0.7375	0.95	0.8	0.825	0.6125	0.841666667	0.5875
10/02/2003 09:00:00	0.1	0.3625	0.129166667	0.504166667	0.408333333	0.458333333	0.7375	0.95	0.8	0.825	0.6125	0.841666667	0.5875
10/02/2003 10:00:00	0.1	0.3625	0.129166667	0.504166667	0.408333333	0.458333333	0.7375	0.95	0.8	0.825	0.6125	0.841666667	0.5875
10/02/2003 11:00:00	0.1	0.3625	0.129166667	0.504166667	0.408333333	0.458333333	0.7375	0.95	0.8	0.825	0.6125	0.841666667	0.5875
10/02/2003 12:00:00	0.1	0.3625	0.129166667	0.504166667	0.408333333	0.458333333	0.7375	0.95	0.8	0.825	0.6125	0.841666667	0.5875
10/02/2003 13:00:00	0.1	0.3625	0.129166667	0.504166667	0.408333333	0.458333333	0.7375	0.95	0.8	0.825	0.6125	0.841666667	0.5875
10/02/2003 14:00:00	0.1	0.3625	0.129166667	0.504166667	0.408333333	0.458333333	0.7375	0.95	0.8	0.825	0.6125	0.841666667	0.5875
10/02/2003 15:00:00	0.1	0.3625	0.129166667	0.504166667	0.408333333	0.458333333	0.7375	0.95	0.8	0.825	0.6125	0.841666667	0.5875
10/02/2003 16:00:00	0.1	0.3625	0.129166667	0.504166667	0.408333333	0.458333333	0.7375	0.95	0.8	0.825	0.6125	0.841666667	0.5875
10/02/2003 17:00:00	0.1	0.3625	0.129166667	0.504166667	0.408333333	0.458333333	0.7375	0.95	0.8	0.825	0.6125	0.841666667	0.5875
10/02/2003 18:00:00	0.1	0.3625	0.129166667	0.504166667	0.408333333	0.458333333	0.7375	0.95	0.8	0.825	0.6125	0.841666667	0.5875
10/02/2003 19:00:00	0.1	0.3625	0.129166667	0.504166667	0.408333333	0.458333333	0.7375	0.95	0.8	0.825	0.6125	0.841666667	0.5875
10/02/2003 20:00:00	0.1	0.3625	0.129166667	0.504166667	0.408333333	0.458333333	0.7375	0.95	0.8	0.825	0.6125	0.841666667	0.5875
10/02/2003 21:00:00	0.1	0.3625	0.129166667	0.504166667	0.408333333	0.458333333	0.7375	0.95	0.8	0.825	0.6125	0.841666667	0.5875
10/02/2003 22:00:00	0.1	0.3625	0.129166667	0.504166667	0.408333333	0.458333333	0.7375	0.95	0.8	0.825	0.6125	0.841666667	0.5875
10/02/2003 23:00:00	0.1	0.3625	0.129166667	0.504166667	0.408333333	0.458333333	0.7375	0.95	0.8	0.825	0.6125	0.841666667	0.5875
11/02/2003 00:00:00	0	0	0	0	0	0	0	0	0	0	0	0	0
11/02/2003 01:00:00	0	0	0	0	0	0	0	0	0	0	0	0	0
11/02/2003 02:00:00	0	0	0	0	0	0	0	0	0	0	0	0	0
11/02/2003 03:00:00	0	0	0	0	0	0	0	0	0	0	0	0	0
11/02/2003 04:00:00	0	0	0	0	0	0	0	0	0	0	0	0	0
11/02/2003 05:00:00	0	0	0	0	0	0	0	0	0	0	0	0	0
11/02/2003 06:00:00	0	0	0	0	0	0	0	0	0	0	0	0	0
11/02/2003 07:00:00	0	0	0	0	0	0	0	0	0	0	0	0	0
11/02/2003 08:00:00	0	0	0	0	0	0	0	0	0	0	0	0	0
11/02/2003 09:00:00	0	0	0	0	0	0	0	0	0	0	0	0	0
11/02/2003 10:00:00	0	0	0	0	0	0	0	0	0	0	0	0	0
11/02/2003 11:00:00	0	0	0	0	0	0	0	0	0	0	0	0	0
11/02/2003 12:00:00	0	0	0	0	0	0	0	0	0	0	0	0	0
11/02/2003 13:00:00	0	0	0	0	0	0	0	0	0	0	0	0	0
11/02/2003 14:00:00	0	0	0	0	0	0	0	0	0	0	0	0	0
11/02/2003 15:00:00	0	0	0	0	0	0	0	0	0	0	0	0	0
11/02/2003 16:00:00	0	0	0	0	0	0	0	0	0	0	0	0	0
11/02/2003 17:00:00	0	0	0	0	0	0	0	0	0	0	0	0	0
11/02/2003 18:00:00	0	0	0	0	0	0	0	0	0	0	0	0	0
11/02/2003 19:00:00	0	0	0	0	0	0	0	0	0	0	0	0	0
11/02/2003 20:00:00	0	0	0	0	0	0	0	0	0	0	0	0	0
11/02/2003 21:00:00	0	0	0	0	0	0	0	0	0	0	0	0	0
11/02/2003 22:00:00	0	0	0	0	0	0	0	0	0	0	0	0	0
11/02/2003 23:00:00	0	0	0	0	0	0	0	0	0	0	0	0	0
12/02/2003 00:00:00	0	0	0	0	0	0	0	0	0	0	0	0	0
12/02/2003 01:00:00	0	0	0	0	0	0	0	0	0	0	0	0	0
12/02/2003 02:00:00	0	0	0	0	0	0	0	0	0	0	0	0	0
12/02/2003 03:00:00	0	0	0	0	0	0	0	0	0	0	0	0	0
12/02/2003 04:00:00	0	0	0	0	0	0	0	0	0	0	0	0	0
12/02/2003 05:00:00	0	0	0	0	0	0	0	0	0	0	0	0	0
12/02/2003 06:00:00	0	0	0	0	0	0	0	0	0	0	0	0	0
12/02/2003 07:00:00	0	0	0	0	0	0	0	0	0	0	0	0	0
12/02/2003 08:00:00	0	0	0	0	0	0	0	0	0	0	0	0	0
12/02/2003 09:00:00	0	0	0	0	0	0	0	0	0	0	0	0	0
12/02/2003 10:00:00	0	0	0	0	0	0	0	0	0	0	0	0	0
12/02/2003 11:00:00	0	0	0	0	0	0	0	0	0	0	0	0	0
12/02/2003 12:00:00	0	0	0	0	0	0	0	0	0	0	0	0	0
12/02/2003 13:00:00	0	0	0	0	0	0	0	0	0	0	0	0	0
12/02/2003 14:00:00	0	0	0	0	0	0	0	0	0	0	0	0	0
12/02/2003 15:00:00	0	0	0	0	0	0	0	0	0	0	0	0	0
12/02/2003 16:00:00	0	0	0	0	0	0	0	0	0	0	0	0	0
12/02/2003 17:00:00	0	0	0	0	0	0	0	0	0	0	0	0	0
12/02/2003 18:00:00	0	0	0	0	0	0	0	0	0	0	0	0	0
12/02/2003 19:00:00	0	0	0	0	0	0	0	0	0	0	0	0	0
12/02/2003 20:00:00	0	0	0	0	0	0	0	0	0	0	0	0	0
12/02/2003 21:00:00	0	0	0	0	0	0	0	0	0	0	0	0	0
12/02/2003 22:00:00	0	0	0	0	0	0	0	0	0	0	0	0	0
12/02/2003 23:00:00	0	0	0	0	0	0	0	0	0	0	0	0	0
13/02/2003 00:00:00	0.0125	0.025	0.104166667	0.05	0.045833333	0	0.075	0.0875	0.120833333	0.095833333	0.116666667	0.066666667	0.375
13/02/2003 01:00:00	0.0125	0.025	0.104166667	0.05	0.045833333	0	0.075	0.0875	0.120833333	0.095833333	0.116666667	0.066666667	0.375
13/02/2003 02:00:00	0.0125	0.025	0.104166667	0.05	0.045833333	0	0.075	0.0875	0.120833333	0.095833333	0.116666667	0.066666667	0.375
13/02/2003 03:00:00	0.0125	0.025	0.104166667	0.05	0.045833333	0	0.075	0.0875	0.120833333	0.095833333	0.116666667	0.066666667	0.375
13/02/2003 04:00:00	0.0125	0.025	0.104166667	0.05	0.045833333	0	0.075	0.0875	0.120833333	0.095833333	0.116666667	0.066666667	0.375
13/02/2003 05:00:00	0.0125	0.025	0.104166667	0.05	0.045833333	0	0.075	0.0875	0.120833333	0.095833333	0.116666667	0.066666667	0.375
13/02/2003 06:00:00	0.0125	0.025	0.104166667	0.05	0.045833333	0	0.075	0.0875	0.120833333	0.095833333	0.116666667	0.066666667	0.375
13/02/2003 07:00:00	0.0125	0.025	0.104166667	0.05	0.045833333	0	0.075	0.0875	0.120833333	0.095833333	0.116666667	0.066666667	0.375
13/02/2003 08:00:00	0.0125	0.025	0.104166667	0.05	0.045833333	0	0.075	0.0875	0.120833333	0.095833333	0.116666667	0.066666667	0.375
13/02/2003 09:00:00	0.0125	0.025	0.104166667	0.05	0.045833333	0	0.075	0.0875	0.120833333	0.095833333	0.116666667	0.066666667	0.375
13/02/2003 10:00:00	0.0125	0.025	0.104166667	0.05	0.045833333	0	0.075	0.0875	0.120833333	0.095833333	0.116666667	0.066666667	0.375
13/02/2003 11:00:00	0.0125	0.025	0.104166667	0.05	0.045833333	0	0.075	0.0875	0.120833333	0.095833333	0.116666667	0.066666667	0.375
13/02/2003 12:00:00	0.0125	0.025	0.104166667	0.05	0.045833333	0	0.075	0.0875	0.120833333	0.095833333	0.116666667	0.066666667	0.375
13/02/2003 13:00:00	0.0125	0.025	0.104166667	0.05	0.045833333	0	0.075	0.0875	0.120833333	0.095833333	0.116666667	0.066666667	0.375
13/02/2003 14:00:00	0.0125	0.025	0.104166667	0.05	0.045833333	0	0.075	0.0875	0.120833333	0.095833333	0.116666667	0.066666667	0.375
13/02/2003 15:00:00	0.0125	0.025	0.104166667	0.05	0.045833333	0	0.075	0.0875	0.120833333	0.095833333	0.116666667	0.066666667	0.375
13/02/2003 16:00:00	0.0125	0.025	0.104166667	0.05	0.045833333	0	0.075	0.0875	0.120833333	0.095833333	0.116666667	0.066666667	0.375
13/02/2003 17:00:00	0.0125	0.025	0.104166667	0.05	0.045833333	0	0.075	0.0875	0.120833333	0.095833333	0.116666667	0.066666667	0.375
13/02/2003 18:00:00	0.0125	0.025	0.104166667	0.05	0.045833333	0	0.075	0.0875	0.120833333	0.095833333	0.116666667	0.066666667	0.375
13/02/2003 19:00:00	0.0125	0.025	0.104166667	0.05	0.045833333	0	0.075	0.0875	0.120833333	0.095833333	0.116666667	0.066666667	0.375
13/02/2003 20:00:00	0.0125	0.025	0.104166667	0.05	0.045833333	0	0.075	0.0875	0.120833333	0.095833333	0.116666667	0.066666667	0.375
13/02/2003 21:00:00	0.0125	0.025	0.104166667	0.05	0.045833333	0	0.075	0.0875	0.120833333	0.095833333	0.116666667	0.066666667	0.375
13/02/2003 22:00:00	0.0125	0.025	0.104166667	0.05	0.045833333	0	0.075	0.0875	0.120833333	0.095833333	0.116666667	0.066666667	0.375
13/02/2003 23:00:00	0.0125	0.025	0.104166667	0.05	0.045833333	0	0.075	0.0875	0.120833333	0.095833333	0.116666667	0.066666667	0.375
14/02/2003 00:00:00	0.1375	0.1125	0.025	0.1125	0.108333333	0.108333333	0.095833333	0.083333333	0.095833333	0.054166667	0.066666667	0.079166667	0.104166667
14/02/2003 01:00:00	0.1375	0.1125	0.025	0.1125	0.108333333	0.108333333	0.095833333	0.083333333	0.095833333	0.054166667	0.066666667	0.079166667	0.104166667
14/02/2003 02:00:00	0.1375	0.1125	0.025	0.1125	0.108333333	0.108333333	0.095833333	0.083333333	0.095833333	0.054166667	0.066666667	0.079166667	0.104166667
14/02/2003 03:00:00	0.1375	0.1125	0.025	0.1125	0.108333333	0.108333333	0.095833333	0.083333333	0.095833333	0.054166667	0.066666667	0.079166667	0.104166667
14/02/2003 04:00:00	0.1375	0.1125	0.025	0.1125	0.108333333	0.108333333	0.095833333	0.083333333	0.095833333	0.054166667	0.066666667	0.079166667	0.104166667
14/02/2003 05:00:00	0.1375	0.1125	0.025	0.1125	0.108333333	0.108333333	0.095833333	0.083333333	0.095833333	0.054166667	0.066666667	0.079166667	0.104166667
14/02/2003 06:00:00	0.1375	0.1125	0.025	0.1125	0.108333333	0.108333333	0.095833333	0.083333333	0.095833333	0.054166667	0.066666667	0.079166667	0.104166667
14/02/2003 07:00:00	0.1375	0.1125	0.025	0.1125	0.108333333	0.108333333	0.095833333	0.083333333	0.095833333	0.054166667	0.066666667	0.079166667	0.104166667
14/02/2003 08:00:00	0.1375	0.1125	0.025	0.1125	0.108333333	0.108333333	0.095833333	0.083333333	0.095833333	0.054166667	0.066666667	0.079166667	0.104166667
14/02/2003 09:00:00	0.1375	0.1125	0.025	0.1125	0.108333333	0.108333333	0.095833333	0.083333333	0.095833333	0.054166667	0.066666667	0.079166667	0.104166667
14/02/2003 10:00:00	0.1375	0.1125	0.025	0.1125	0.108333333	0.108333333	0.095833333	0.083333333	0.095833333	0.054166667	0.066666667	0.079166667	0.104166667
14/02/2003 11:00:00	0.1375	0.1125	0.025	0.1125	0.108333333	0.108333333	0.095833333	0.083333333	0.095833333	0.054166667	0.066666667	0.079166667	0.104166667
14/02/2003 12:00:00	0.1375	0.1125	0.025	0.1125	0.108333333	0.108333333	0.095833333	0.083333333	0.095833333	0.054166667	0.066666667	0.079166667	0.104166667
14/02/2003 13:00:00	0.1375	0.1125	0.025	0.1125	0.108333333	0.108333333	0.095833333	0.083333333	0.095833333	0.054166667	0.066666667	0.079166667	0.104166667
14/02/2003 14:00:00	0.1375	0.1125	0.025	0.1125	0.108333333	0.108333333	0.095833333	0.083333333	0.095833333	0.054166667	0.066666667	0.079166667	0.104166667
14/02/2003 15:00:00	0.1375	0.1125	0.025	0.1125	0.108333333	0.108333333	0.095833333	0.083333333	0.095833333	0.054166667	0.066666667	0.079166667	0.104166667
14/02/2003 16:00:00	0.1375	0.1125	0.025	0.1125	0.108333333	0.108333333	0.095833333	0.083333333	0.095833333	0.054166667	0.066666667	0.079166667	0.104166667
14/02/2003 17:00:00	0.1375	0.1125	0.025	0.1125	0.108333333	0.108333333	0.095833333	0.083333333	0.095833333	0.054166667	0.066666667	0.079166667	0.104166667
14/02/2003 18:00:00	0.1375	0.1125	0.025	0.1125	0.108333333	0.108333333	0.095833333	0.083333333	0.095833333	0.054166667	0.066666667	0.079166667	0.104166667
14/02/2003 19:00:00	0.1375	0.1125	0.025	0.1125	0.108333333	0.108333333	0.095833333	0.083333333	0.095833333	0.054166667	0.066666667	0.079166667	0.104166667
14/02/2003 20:00:00	0.1375	0.1125	0.025	0.1125	0.108333333	0.108333333	0.095833333	0.083333333	0.095833333	0.054166667	0.066666667	0.079166667	0.104166667
14/02/2003 21:00:00	0.1375	0.1125	0.025	0.1125	0.108333333	0.108333333	0.095833333	0.083333333	0.095833333	0.054166667	0.066666667	0.079166667	0.104166667
14/02/2003 22:00:00	0.1375	0.1125	0.025	0.1125	0.108333333	0.108333333	0.095833333	0.083333333	0.095833333	0.054166667	0.066666667	0.079166667	0.104166667
14/02/2003 23:00:00	0.1375	0.1125	0.025	0.1125	0.108333333	0.108333333	0.095833333	0.083333333	0.095833333	0.054166667	0.066666667	0.079166667	0.104166667
15/02/2003 00:00:00	0	0	0	0	0	0	0	0	0.016666667	0.025	0.008333333	0.004166667	0
15/02/2003 01:00:00	0	0	0	0	0	0	0	0	0.016666667	0.025	0.008333333	0.004166667	0
15/02/2003 02:00:00	0	0	0	0	0	0	0	0	0.016666667	0.025	0.008333333	0.004166667	0
15/02/2003 03:00:00	0	0	0	0	0	0	0	0	0.016666667	0.025	0.008333333	0.004166667	0
15/02/2003 04:00:00	0	0	0	0	0	0	0	0	0.016666667	0.025	0.008333333	0.004166667	0
15/02/2003 05:00:00	0	0	0	0	0	0	0	0	0.016666667	0.025	0.008333333	0.004166667	0
15/02/2003 06:00:00	0	0	0	0	0	0	0	0	0.016666667	0.025	0.008333333	0.004166667	0
15/02/2003 07:00:00	0	0	0	0	0	0	0	0	0.016666667	0.025	0.008333333	0.004166667	0
15/02/2003 08:00:00	0	0	0	0	0	0	0	0	0.016666667	0.025	0.008333333	0.004166667	0
15/02/2003 09:00:00	0	0	0	0	0	0	0	0	0.016666667	0.025	0.008333333	0.004166667	0
15/02/2003 10:00:00	0	0	0	0	0	0	0	0	0.016666667	0.025	0.008333333	0.004166667	0
15/02/2003 11:00:00	0	0	0	0	0	0	0	0	0.016666667	0.025	0.008333333	0.004166667	0
15/02/2003 12:00:00	0	0	0	0	0	0	0	0	0.016666667	0.025	0.008333333	0.004166667	0
15/02/2003 13:00:00	0	0	0	0	0	0	0	0	0.016666667	0.025	0.008333333	0.004166667	0
15/02/2003 14:00:00	0	0	0	0	0	0	0	0	0.016666667	0.025	0.008333333	0.004166667	0
15/02/2003 15:00:00	0	0	0	0	0	0	0	0	0.016666667	0.025	0.008333333	0.004166667	0
15/02/2003 16:00:00	0	0	0	0	0	0	0	0	0.016666667	0.025	0.008333333	0.004166667	0
15/02/2003 17:00:00	0	0	0	0	0	0	0	0	0.016666667	0.025	0.008333333	0.004166667	0
15/02/2003 18:00:00	0	0	0	0	0	0	0	0	0.016666667	0.025	0.008333333	0.004166667	0
15/02/2003 19:00:00	0	0	0	0	0	0	0	0	0.016666667	0.025	0.008333333	0.004166667	0
15/02/2003 20:00:00	0	0	0	0	0	0	0	0	0.016666667	0.025	0.008333333	0.004166667	0
15/02/2003 21:00:00	0	0	0	0	0	0	0	0	0.016666667	0.025	0.008333333	0.004166667	0
15/02/2003 22:00:00	0	0	0	0	0	0	0	0	0.016666667	0.025	0.008333333	0.004166667	0
15/02/2003 23:00:00	0	0	0	0	0	0	0	0	0.016666667	0.025	0.008333333	0.004166667	0
16/02/2003 00:00:00	0	0	0	0	0	0	0	0	0	0	0	0	0
16/02/2003 01:00:00	0	0	0	0	0	0	0	0	0	0	0	0	0
16/02/2003 02:00:00	0	0	0	0	0	0	0	0	0	0	0	0	0
16/02/2003 03:00:00	0	0	0	0	0	0	0	0	0	0	0	0	0
16/02/2003 04:00:00	0	0	0	0	0	0	0	0	0	0	0	0	0
16/02/2003 05:00:00	0	0	0	0	0	0	0	0	0	0	0	0	0
16/02/2003 06:00:00	0	0	0	0	0	0	0	0	0	0	0	0	0
16/02/2003 07:00:00	0	0	0	0	0	0	0	0	0	0	0	0	0
16/02/2003 08:00:00	0	0	0	0	0	0	0	0	0	0	0	0	0
16/02/2003 09:00:00	0	0	0	0	0	0	0	0	0	0	0	0	0
16/02/2003 10:00:00	0	0	0	0	0	0	0	0	0	0	0	0	0
16/02/2003 11:00:00	0	0	0	0	0	0	0	0	0	0	0	0	0
16/02/2003 12:00:00	0	0	0	0	0	0	0	0	0	0	0	0	0
16/02/2003 13:00:00	0	0	0	0	0	0	0	0	0	0	0	0	0
16/02/2003 14:00:00	0	0	0	0	0	0	0	0	0	0	0	0	0
16/02/2003 15:00:00	0	0	0	0	0	0	0	0	0	0	0	0	0
16/02/2003 16:00:00	0	0	0	0	0	0	0	0	0	0	0	0	0
16/02/2003 17:00:00	0	0	0	0	0	0	0	0	0	0	0	0	0
16/02/2003 18:00:00	0	0	0	0	0	0	0	0	0	0	0	0	0
16/02/2003 19:00:00	0	0	0	0	0	0	0	0	0	0	0	0	0
16/02/2003 20:00:00	0	0	0	0	0	0	0	0	0	0	0	0	0
16/02/2003 21:00:00	0	0	0	0	0	0	0	0	0	0	0	0	0
16/02/2003 22:00:00	0	0	0	0	0	0	0	0	0	0	0	0	0
16/02/2003 23:00:00	0	0	0	0	0	0	0	0	0	0	0	0	0
17/02/2003 00:00:00	0	0	0	0	0	0	0	0	0	0	0	0	0
17/02/2003 01:00:00	0	0	0	0	0	0	0	0	0	0	0	0	0
17/02/2003 02:00:00	0	0	0	0	0	0	0	0	0	0	0	0	0
17/02/2003 03:00:00	0	0	0	0	0	0	0	0	0	0	0	0	0
17/02/2003 04:00:00	0	0	0	0	0	0	0	0	0	0	0	0	0
17/02/2003 05:00:00	0	0	0	0	0	0	0	0	0	0	0	0	0
17/02/2003 06:00:00	0	0	0	0	0	0	0	0	0	0	0	0	0
17/02/2003 07:00:00	0	0	0	0	0	0	0	0	0	0	0	0	0
17/02/2003 08:00:00	0	0	0	0	0	0	0	0	0	0	0	0	0
17/02/2003 09:00:00	0	0	0	0	0	0	0	0	0	0	0	0	0
17/02/2003 10:00:00	0	0	0	0	0	0	0	0	0	0	0	0	0
17/02/2003 11:00:00	0	0	0	0	0	0	0	0	0	0	0	0	0
17/02/2003 12:00:00	0	0	0	0	0	0	0	0	0	0	0	0	0
17/02/2003 13:00:00	0	0	0	0	0	0	0	0	0	0	0	0	0
17/02/2003 14:00:00	0	0	0	0	0	0	0	0	0	0	0	0	0
17/02/2003 15:00:00	0	0	0	0	0	0	0	0	0	0	0	0	0
17/02/2003 16:00:00	0	0	0	0	0	0	0	0	0	0	0	0	0
17/02/2003 17:00:00	0	0	0	0	0	0	0	0	0	0	0	0	0
17/02/2003 18:00:00	0	0	0	0	0	0	0	0	0	0	0	0	0
17/02/2003 19:00:00	0	0	0	0	0	0	0	0	0	0	0	0	0
17/02/2003 20:00:00	0	0	0	0	0	0	0	0	0	0	0	0	0
17/02/2003 21:00:00	0	0	0	0	0	0	0	0	0	0	0	0	0
17/02/2003 22:00:00	0	0	0	0	0	0	0	0	0	0	0	0	0
17/02/2003 23:00:00	0	0	0	0	0	0	0	0	0	0	0	0	0
18/02/2003 00:00:00	0	0	0	0	0	0	0	0	0	0	0	0	0
18/02/2003 01:00:00	0	0	0	0	0	0	0	0	0	0	0	0	0
18/02/2003 02:00:00	0	0	0	0	0	0	0	0	0	0	0	0	0
18/02/2003 03:00:00	0	0	0	0	0	0	0	0	0	0	0	0	0
18/02/2003 04:00:00	0	0	0	0	0	0	0	0	0	0	0	0	0
18/02/2003 05:00:00	0	0	0	0	0	0	0	0	0	0	0	0	0
18/02/2003 06:00:00	0	0	0	0	0	0	0	0	0	0	0	0	0
18/02/2003 07:00:00	0	0	0	0	0	0	0	0	0	0	0	0	0
18/02/2003 08:00:00	0	0	0	0	0	0	0	0	0	0	0	0	0
18/02/2003 09:00:00	0	0	0	0	0	0	0	0	0	0	0	0	0
18/02/2003 10:00:00	0	0	0	0	0	0	0	0	0	0	0	0	0
18/02/2003 11:00:00	0	0	0	0	0	0	0	0	0	0	0	0	0
18/02/2003 12:00:00	0	0	0	0	0	0	0	0	0	0	0	0	0
18/02/2003 13:00:00	0	0	0	0	0	0	0	0	0	0	0	0	0
18/02/2003 14:00:00	0	0	0	0	0	0	0	0	0	0	0	0	0
18/02/2003 15:00:00	0	0	0	0	0	0	0	0	0	0	0	0	0
18/02/2003 16:00:00	0	0	0	0	0	0	0	0	0	0	0	0	0
18/02/2003 17:00:00	0	0	0	0	0	0	0	0	0	0	0	0	0
18/02/2003 18:00:00	0	0	0	0	0	0	0	0	0	0	0	0	0
18/02/2003 19:00:00	0	0	0	0	0	0	0	0	0	0	0	0	0
18/02/2003 20:00:00	0	0	0	0	0	0	0	0	0	0	0	0	0
18/02/2003 21:00:00	0	0	0	0	0	0	0	0	0	0	0	0	0
18/02/2003 22:00:00	0	0	0	0	0	0	0	0	0	0	0	0	0
18/02/2003 23:00:00	0	0	0	0	0	0	0	0	0	0	0	0	0
19/02/2003 00:00:00	0	0	0	0	0	0	0	0	0	0	0	0	0
19/02/2003 01:00:00	0	0	0	0	0	0	0	0	0	0	0	0	0
19/02/2003 02:00:00	0	0	0	0	0	0	0	0	0	0	0	0	0
19/02/2003 03:00:00	0	0	0	0	0	0	0	0	0	0	0	0	0
19/02/2003 04:00:00	0	0	0	0	0	0	0	0	0	0	0	0	0
19/02/2003 05:00:00	0	0	0	0	0	0	0	0	0	0	0	0	0
19/02/2003 06:00:00	0	0	0	0	0	0	0	0	0	0	0	0	0
19/02/2003 07:00:00	0	0	0	0	0	0	0	0	0	0	0	0	0
19/02/2003 08:00:00	0	0	0	0	0	0	0	0	0	0	0	0	0
19/02/2003 09:00:00	0	0	0	0	0	0	0	0	0	0	0	0	0
19/02/2003 10:00:00	0	0	0	0	0	0	0	0	0	0	0	0	0
19/02/2003 11:00:00	0	0	0	0	0	0	0	0	0	0	0	0	0
19/02/2003 12:00:00	0	0	0	0	0	0	0	0	0	0	0	0	0
19/02/2003 13:00:00	0	0	0	0	0	0	0	0	0	0	0	0	0
19/02/2003 14:00:00	0	0	0	0	0	0	0	0	0	0	0	0	0
19/02/2003 15:00:00	0	0	0	0	0	0	0	0	0	0	0	0	0
19/02/2003 16:00:00	0	0	0	0	0	0	0	0	0	0	0	0	0
19/02/2003 17:00:00	0	0	0	0	0	0	0	0	0	0	0	0	0
19/02/2003 18:00:00	0	0	0	0	0	0	0	0	0	0	0	0	0
19/02/2003 19:00:00	0	0	0	0	0	0	0	0	0	0	0	0	0
19/02/2003 20:00:00	0	0	0	0	0	0	0	0	0	0	0	0	0
19/02/2003 21:00:00	0	0	0	0	0	0	0	0	0	0	0	0	0
19/02/2003 22:00:00	0	0	0	0	0	0	0	0	0	0	0	0	0
19/02/2003 23:00:00	0	0	0	0	0	0	0	0	0	0	0	0	0
20/02/2003 00:00:00	0.316666667	0.025	0.0625	0.0625	0.0625	0	0.120833333	0.141666667	0.025	0.016666667	0	0	0
20/02/2003 01:00:00	0.316666667	0.025	0.0625	0.0625	0.0625	0	0.120833333	0.141666667	0.025	0.016666667	0	0	0
20/02/2003 02:00:00	0.316666667	0.025	0.0625	0.0625	0.0625	0	0.120833333	0.141666667	0.025	0.016666667	0	0	0
20/02/2003 03:00:00	0.316666667	0.025	0.0625	0.0625	0.0625	0	0.120833333	0.141666667	0.025	0.016666667	0	0	0
20/02/2003 04:00:00	0.316666667	0.025	0.0625	0.0625	0.0625	0	0.120833333	0.141666667	0.025	0.016666667	0	0	0
20/02/2003 05:00:00	0.316666667	0.025	0.0625	0.0625	0.0625	0	0.120833333	0.141666667	0.025	0.016666667	0	0	0
20/02/2003 06:00:00	0.316666667	0.025	0.0625	0.0625	0.0625	0	0.120833333	0.141666667	0.025	0.016666667	0	0	0
20/02/2003 07:00:00	0.316666667	0.025	0.0625	0.0625	0.0625	0	0.120833333	0.141666667	0.025	0.016666667	0	0	0
20/02/2003 08:00:00	0.316666667	0.025	0.0625	0.0625	0.0625	0	0.120833333	0.141666667	0.025	0.016666667	0	0	0
20/02/2003 09:00:00	0.316666667	0.025	0.0625	0.0625	0.0625	0	0.120833333	0.141666667	0.025	0.016666667	0	0	0
20/02/2003 10:00:00	0.316666667	0.025	0.0625	0.0625	0.0625	0	0.120833333	0.141666667	0.025	0.016666667	0	0	0
20/02/2003 11:00:00	0.316666667	0.025	0.0625	0.0625	0.0625	0	0.120833333	0.141666667	0.025	0.016666667	0	0	0
20/02/2003 12:00:00	0.316666667	0.025	0.0625	0.0625	0.0625	0	0.120833333	0.141666667	0.025	0.016666667	0	0	0
20/02/2003 13:00:00	0.316666667	0.025	0.0625	0.0625	0.0625	0	0.120833333	0.141666667	0.025	0.016666667	0	0	0
20/02/2003 14:00:00	0.316666667	0.025	0.0625	0.0625	0.0625	0	0.120833333	0.141666667	0.025	0.016666667	0	0	0
20/02/2003 15:00:00	0.316666667	0.025	0.0625	0.0625	0.0625	0	0.120833333	0.141666667	0.025	0.016666667	0	0	0
20/02/2003 16:00:00	0.316666667	0.025	0.0625	0.0625	0.0625	0	0.120833333	0.141666667	0.025	0.016666667	0	0	0
20/02/2003 17:00:00	0.316666667	0.025	0.0625	0.0625	0.0625	0	0.120833333	0.141666667	0.025	0.016666667	0	0	0
20/02/2003 18:00:00	0.316666667	0.025	0.0625	0.0625	0.0625	0	0.120833333	0.141666667	0.025	0.016666667	0	0	0
20/02/2003 19:00:00	0.316666667	0.025	0.0625	0.0625	0.0625	0	0.120833333	0.141666667	0.025	0.016666667	0	0	0
20/02/2003 20:00:00	0.316666667	0.025	0.0625	0.0625	0.0625	0	0.120833333	0.141666667	0.025	0.016666667	0	0	0
20/02/2003 21:00:00	0.316666667	0.025	0.0625	0.0625	0.0625	0	0.120833333	0.141666667	0.025	0.016666667	0	0	0
20/02/2003 22:00:00	0.316666667	0.025	0.0625	0.0625	0.0625	0	0.120833333	0.141666667	0.025	0.016666667	0	0	0
20/02/2003 23:00:00	0.316666667	0.025	0.0625	0.0625	0.0625	0	0.120833333	0.141666667	0.025	0.016666667	0	0	0
21/02/2003 00:00:00	0.325	0.075	0.191666667	0.404166667	0.2375	0.258333333	0.320833333	0.304166667	0.204166667	0.104166667	0.15	0.091666667	0.229166667
21/02/2003 01:00:00	0.325	0.075	0.191666667	0.404166667	0.2375	0.258333333	0.320833333	0.304166667	0.204166667	0.104166667	0.15	0.091666667	0.229166667
21/02/2003 02:00:00	0.325	0.075	0.191666667	0.404166667	0.2375	0.258333333	0.320833333	0.304166667	0.204166667	0.104166667	0.15	0.091666667	0.229166667
21/02/2003 03:00:00	0.325	0.075	0.191666667	0.404166667	0.2375	0.258333333	0.320833333	0.304166667	0.204166667	0.104166667	0.15	0.091666667	0.229166667
21/02/2003 04:00:00	0.325	0.075	0.191666667	0.404166667	0.2375	0.258333333	0.320833333	0.304166667	0.204166667	0.104166667	0.15	0.091666667	0.229166667
21/02/2003 05:00:00	0.325	0.075	0.191666667	0.404166667	0.2375	0.258333333	0.320833333	0.304166667	0.204166667	0.104166667	0.15	0.091666667	0.229166667
21/02/2003 06:00:00	0.325	0.075	0.191666667	0.404166667	0.2375	0.258333333	0.320833333	0.304166667	0.204166667	0.104166667	0.15	0.091666667	0.229166667
21/02/2003 07:00:00	0.325	0.075	0.191666667	0.404166667	0.2375	0.258333333	0.320833333	0.304166667	0.204166667	0.104166667	0.15	0.091666667	0.229166667
21/02/2003 08:00:00	0.325	0.075	0.191666667	0.404166667	0.2375	0.258333333	0.320833333	0.304166667	0.204166667	0.104166667	0.15	0.091666667	0.229166667
21/02/2003 09:00:00	0.325	0.075	0.191666667	0.404166667	0.2375	0.258333333	0.320833333	0.304166667	0.204166667	0.104166667	0.15	0.091666667	0.229166667
21/02/2003 10:00:00	0.325	0.075	0.191666667	0.404166667	0.2375	0.258333333	0.320833333	0.304166667	0.204166667	0.104166667	0.15	0.091666667	0.229166667
21/02/2003 11:00:00	0.325	0.075	0.191666667	0.404166667	0.2375	0.258333333	0.320833333	0.304166667	0.204166667	0.104166667	0.15	0.091666667	0.229166667
21/02/2003 12:00:00	0.325	0.075	0.191666667	0.404166667	0.2375	0.258333333	0.320833333	0.304166667	0.204166667	0.104166667	0.15	0.091666667	0.229166667
21/02/2003 13:00:00	0.325	0.075	0.191666667	0.404166667	0.2375	0.258333333	0.320833333	0.304166667	0.204166667	0.104166667	0.15	0.091666667	0.229166667
21/02/2003 14:00:00	0.325	0.075	0.191666667	0.404166667	0.2375	0.258333333	0.320833333	0.304166667	0.204166667	0.104166667	0.15	0.091666667	0.229166667
21/02/2003 15:00:00	0.325	0.075	0.191666667	0.404166667	0.2375	0.258333333	0.320833333	0.304166667	0.204166667	0.104166667	0.15	0.091666667	0.229166667
21/02/2003 16:00:00	0.325	0.075	0.191666667	0.404166667	0.2375	0.258333333	0.320833333	0.304166667	0.204166667	0.104166667	0.15	0.091666667	0.229166667
21/02/2003 17:00:00	0.325	0.075	0.191666667	0.404166667	0.2375	0.258333333	0.320833333	0.304166667	0.204166667	0.104166667	0.15	0.091666667	0.229166667
21/02/2003 18:00:00	0.325	0.075	0.191666667	0.404166667	0.2375	0.258333333	0.320833333	0.304166667	0.204166667	0.104166667	0.15	0.091666667	0.229166667
21/02/2003 19:00:00	0.325	0.075	0.191666667	0.404166667	0.2375	0.258333333	0.320833333	0.304166667	0.204166667	0.104166667	0.15	0.091666667	0.229166667
21/02/2003 20:00:00	0.325	0.075	0.191666667	0.404166667	0.2375	0.258333333	0.320833333	0.304166667	0.204166667	0.104166667	0.15	0.091666667	0.229166667
21/02/2003 21:00:00	0.325	0.075	0.191666667	0.404166667	0.2375	0.258333333	0.320833333	0.304166667	0.204166667	0.104166667	0.15	0.091666667	0.229166667
21/02/2003 22:00:00	0.325	0.075	0.191666667	0.404166667	0.2375	0.258333333	0.320833333	0.304166667	0.204166667	0.104166667	0.15	0.091666667	0.229166667
21/02/2003 23:00:00	0.325	0.075	0.191666667	0.404166667	0.2375	0.258333333	0.320833333	0.304166667	0.204166667	0.104166667	0.15	0.091666667	0.229166667
22/02/2003 00:00:00	0.0625	0.008333333	0.020833333	0.083333333	0.066666667	0	0	0	0.045833333	0.0375	0	0.008333333	0
22/02/2003 01:00:00	0.0625	0.008333333	0.020833333	0.083333333	0.066666667	0	0	0	0.045833333	0.0375	0	0.008333333	0
22/02/2003 02:00:00	0.0625	0.008333333	0.020833333	0.083333333	0.066666667	0	0	0	0.045833333	0.0375	0	0.008333333	0
22/02/2003 03:00:00	0.0625	0.008333333	0.020833333	0.083333333	0.066666667	0	0	0	0.045833333	0.0375	0	0.008333333	0
22/02/2003 04:00:00	0.0625	0.008333333	0.020833333	0.083333333	0.066666667	0	0	0	0.045833333	0.0375	0	0.008333333	0
22/02/2003 05:00:00	0.0625	0.008333333	0.020833333	0.083333333	0.066666667	0	0	0	0.045833333	0.0375	0	0.008333333	0
22/02/2003 06:00:00	0.0625	0.008333333	0.020833333	0.083333333	0.066666667	0	0	0	0.045833333	0.0375	0	0.008333333	0
22/02/2003 07:00:00	0.0625	0.008333333	0.020833333	0.083333333	0.066666667	0	0	0	0.045833333	0.0375	0	0.008333333	0
22/02/2003 08:00:00	0.0625	0.008333333	0.020833333	0.083333333	0.066666667	0	0	0	0.045833333	0.0375	0	0.008333333	0
22/02/2003 09:00:00	0.0625	0.008333333	0.020833333	0.083333333	0.066666667	0	0	0	0.045833333	0.0375	0	0.008333333	0
22/02/2003 10:00:00	0.0625	0.008333333	0.020833333	0.083333333	0.066666667	0	0	0	0.045833333	0.0375	0	0.008333333	0
22/02/2003 11:00:00	0.0625	0.008333333	0.020833333	0.083333333	0.066666667	0	0	0	0.045833333	0.0375	0	0.008333333	0
22/02/2003 12:00:00	0.0625	0.008333333	0.020833333	0.083333333	0.066666667	0	0	0	0.045833333	0.0375	0	0.008333333	0
22/02/2003 13:00:00	0.0625	0.008333333	0.020833333	0.083333333	0.066666667	0	0	0	0.045833333	0.0375	0	0.008333333	0
22/02/2003 14:00:00	0.0625	0.008333333	0.020833333	0.083333333	0.066666667	0	0	0	0.045833333	0.0375	0	0.008333333	0
22/02/2003 15:00:00	0.0625	0.008333333	0.020833333	0.083333333	0.066666667	0	0	0	0.045833333	0.0375	0	0.008333333	0
22/02/2003 16:00:00	0.0625	0.008333333	0.020833333	0.083333333	0.066666667	0	0	0	0.045833333	0.0375	0	0.008333333	0
22/02/2003 17:00:00	0.0625	0.008333333	0.020833333	0.083333333	0.066666667	0	0	0	0.045833333	0.0375	0	0.008333333	0
22/02/2003 18:00:00	0.0625	0.008333333	0.020833333	0.083333333	0.066666667	0	0	0	0.045833333	0.0375	0	0.008333333	0
22/02/2003 19:00:00	0.0625	0.008333333	0.020833333	0.083333333	0.066666667	0	0	0	0.045833333	0.0375	0	0.008333333	0
22/02/2003 20:00:00	0.0625	0.008333333	0.020833333	0.083333333	0.066666667	0	0	0	0.045833333	0.0375	0	0.008333333	0
22/02/2003 21:00:00	0.0625	0.008333333	0.020833333	0.083333333	0.066666667	0	0	0	0.045833333	0.0375	0	0.008333333	0
22/02/2003 22:00:00	0.0625	0.008333333	0.020833333	0.083333333	0.066666667	0	0	0	0.045833333	0.0375	0	0.008333333	0
22/02/2003 23:00:00	0.0625	0.008333333	0.020833333	0.083333333	0.066666667	0	0	0	0.045833333	0.0375	0	0.008333333	0
23/02/2003 00:00:00	0	0	0	0	0	0	0	0	0	0	0	0	0
23/02/2003 01:00:00	0	0	0	0	0	0	0	0	0	0	0	0	0
23/02/2003 02:00:00	0	0	0	0	0	0	0	0	0	0	0	0	0
23/02/2003 03:00:00	0	0	0	0	0	0	0	0	0	0	0	0	0
23/02/2003 04:00:00	0	0	0	0	0	0	0	0	0	0	0	0	0
23/02/2003 05:00:00	0	0	0	0	0	0	0	0	0	0	0	0	0
23/02/2003 06:00:00	0	0	0	0	0	0	0	0	0	0	0	0	0
23/02/2003 07:00:00	0	0	0	0	0	0	0	0	0	0	0	0	0
23/02/2003 08:00:00	0	0	0	0	0	0	0	0	0	0	0	0	0
23/02/2003 09:00:00	0	0	0	0	0	0	0	0	0	0	0	0	0
23/02/2003 10:00:00	0	0	0	0	0	0	0	0	0	0	0	0	0
23/02/2003 11:00:00	0	0	0	0	0	0	0	0	0	0	0	0	0
23/02/2003 12:00:00	0	0	0	0	0	0	0	0	0	0	0	0	0
23/02/2003 13:00:00	0	0	0	0	0	0	0	0	0	0	0	0	0
23/02/2003 14:00:00	0	0	0	0	0	0	0	0	0	0	0	0	0
23/02/2003 15:00:00	0	0	0	0	0	0	0	0	0	0	0	0	0
23/02/2003 16:00:00	0	0	0	0	0	0	0	0	0	0	0	0	0
23/02/2003 17:00:00	0	0	0	0	0	0	0	0	0	0	0	0	0
23/02/2003 18:00:00	0	0	0	0	0	0	0	0	0	0	0	0	0
23/02/2003 19:00:00	0	0	0	0	0	0	0	0	0	0	0	0	0
23/02/2003 20:00:00	0	0	0	0	0	0	0	0	0	0	0	0	0
23/02/2003 21:00:00	0	0	0	0	0	0	0	0	0	0	0	0	0
23/02/2003 22:00:00	0	0	0	0	0	0	0	0	0	0	0	0	0
23/02/2003 23:00:00	0	0	0	0	0	0	0	0	0	0	0	0	0
24/02/2003 00:00:00	0	0.029166667	0.041666667	0	0.016666667	0	0.066666667	0.029166667	0.075	0.195833333	0.045833333	0.016666667	0.145833333
24/02/2003 01:00:00	0	0.029166667	0.041666667	0	0.016666667	0	0.066666667	0.029166667	0.075	0.195833333	0.045833333	0.016666667	0.145833333
24/02/2003 02:00:00	0	0.029166667	0.041666667	0	0.016666667	0	0.066666667	0.029166667	0.075	0.195833333	0.045833333	0.016666667	0.145833333
24/02/2003 03:00:00	0	0.029166667	0.041666667	0	0.016666667	0	0.066666667	0.029166667	0.075	0.195833333	0.045833333	0.016666667	0.145833333
24/02/2003 04:00:00	0	0.029166667	0.041666667	0	0.016666667	0	0.066666667	0.029166667	0.075	0.195833333	0.045833333	0.016666667	0.145833333
24/02/2003 05:00:00	0	0.029166667	0.041666667	0	0.016666667	0	0.066666667	0.029166667	0.075	0.195833333	0.045833333	0.016666667	0.145833333
24/02/2003 06:00:00	0	0.029166667	0.041666667	0	0.016666667	0	0.066666667	0.029166667	0.075	0.195833333	0.045833333	0.016666667	0.145833333
24/02/2003 07:00:00	0	0.029166667	0.041666667	0	0.016666667	0	0.066666667	0.029166667	0.075	0.195833333	0.045833333	0.016666667	0.145833333
24/02/2003 08:00:00	0	0.029166667	0.041666667	0	0.016666667	0	0.066666667	0.029166667	0.075	0.195833333	0.045833333	0.016666667	0.145833333
24/02/2003 09:00:00	0	0.029166667	0.041666667	0	0.016666667	0	0.066666667	0.029166667	0.075	0.195833333	0.045833333	0.016666667	0.145833333
24/02/2003 10:00:00	0	0.029166667	0.041666667	0	0.016666667	0	0.066666667	0.029166667	0.075	0.195833333	0.045833333	0.016666667	0.145833333
24/02/2003 11:00:00	0	0.029166667	0.041666667	0	0.016666667	0	0.066666667	0.029166667	0.075	0.195833333	0.045833333	0.016666667	0.145833333
24/02/2003 12:00:00	0	0.029166667	0.041666667	0	0.016666667	0	0.066666667	0.029166667	0.075	0.195833333	0.045833333	0.016666667	0.145833333
24/02/2003 13:00:00	0	0.029166667	0.041666667	0	0.016666667	0	0.066666667	0.029166667	0.075	0.195833333	0.045833333	0.016666667	0.145833333
24/02/2003 14:00:00	0	0.029166667	0.041666667	0	0.016666667	0	0.066666667	0.029166667	0.075	0.195833333	0.045833333	0.016666667	0.145833333
24/02/2003 15:00:00	0	0.029166667	0.041666667	0	0.016666667	0	0.066666667	0.029166667	0.075	0.195833333	0.045833333	0.016666667	0.145833333
24/02/2003 16:00:00	0	0.029166667	0.041666667	0	0.016666667	0	0.066666667	0.029166667	0.075	0.195833333	0.045833333	0.016666667	0.145833333
24/02/2003 17:00:00	0	0.029166667	0.041666667	0	0.016666667	0	0.066666667	0.029166667	0.075	0.195833333	0.045833333	0.016666667	0.145833333
24/02/2003 18:00:00	0	0.029166667	0.041666667	0	0.016666667	0	0.066666667	0.029166667	0.075	0.195833333	0.045833333	0.016666667	0.145833333
24/02/2003 19:00:00	0	0.029166667	0.041666667	0	0.016666667	0	0.066666667	0.029166667	0.075	0.195833333	0.045833333	0.016666667	0.145833333
24/02/2003 20:00:00	0	0.029166667	0.041666667	0	0.016666667	0	0.066666667	0.029166667	0.075	0.195833333	0.045833333	0.016666667	0.145833333
24/02/2003 21:00:00	0	0.029166667	0.041666667	0	0.016666667	0	0.066666667	0.029166667	0.075	0.195833333	0.045833333	0.016666667	0.145833333
24/02/2003 22:00:00	0	0.029166667	0.041666667	0	0.016666667	0	0.066666667	0.029166667	0.075	0.195833333	0.045833333	0.016666667	0.145833333
24/02/2003 23:00:00	0	0.029166667	0.041666667	0	0.016666667	0	0.066666667	0.029166667	0.075	0.195833333	0.045833333	0.016666667	0.145833333
25/02/2003 00:00:00	0.4375	0.154166667	0.775	0.5	1.041666667	0.825	0.570833333	0.570833333	0.229166667	0.445833333	0.579166667	0.5125	0.245833333
25/02/2003 01:00:00	0.4375	0.154166667	0.775	0.5	1.041666667	0.825	0.570833333	0.570833333	0.229166667	0.445833333	0.579166667	0.5125	0.245833333
25/02/2003 02:00:00	0.4375	0.154166667	0.775	0.5	1.041666667	0.825	0.570833333	0.570833333	0.229166667	0.445833333	0.579166667	0.5125	0.245833333
25/02/2003 03:00:00	0.4375	0.154166667	0.775	0.5	1.041666667	0.825	0.570833333	0.570833333	0.229166667	0.445833333	0.579166667	0.5125	0.245833333
25/02/2003 04:00:00	0.4375	0.154166667	0.775	0.5	1.041666667	0.825	0.570833333	0.570833333	0.229166667	0.445833333	0.579166667	0.5125	0.245833333
25/02/2003 05:00:00	0.4375	0.154166667	0.775	0.5	1.041666667	0.825	0.570833333	0.570833333	0.229166667	0.445833333	0.579166667	0.5125	0.245833333
25/02/2003 06:00:00	0.4375	0.154166667	0.775	0.5	1.041666667	0.825	0.570833333	0.570833333	0.229166667	0.445833333	0.579166667	0.5125	0.245833333
25/02/2003 07:00:00	0.4375	0.154166667	0.775	0.5	1.041666667	0.825	0.570833333	0.570833333	0.229166667	0.445833333	0.579166667	0.5125	0.245833333
25/02/2003 08:00:00	0.4375	0.154166667	0.775	0.5	1.041666667	0.825	0.570833333	0.570833333	0.229166667	0.445833333	0.579166667	0.5125	0.245833333
25/02/2003 09:00:00	0.4375	0.154166667	0.775	0.5	1.041666667	0.825	0.570833333	0.570833333	0.229166667	0.445833333	0.579166667	0.5125	0.245833333
25/02/2003 10:00:00	0.4375	0.154166667	0.775	0.5	1.041666667	0.825	0.570833333	0.570833333	0.229166667	0.445833333	0.579166667	0.5125	0.245833333
25/02/2003 11:00:00	0.4375	0.154166667	0.775	0.5	1.041666667	0.825	0.570833333	0.570833333	0.229166667	0.445833333	0.579166667	0.5125	0.245833333
25/02/2003 12:00:00	0.4375	0.154166667	0.775	0.5	1.041666667	0.825	0.570833333	0.570833333	0.229166667	0.445833333	0.579166667	0.5125	0.245833333
25/02/2003 13:00:00	0.4375	0.154166667	0.775	0.5	1.041666667	0.825	0.570833333	0.570833333	0.229166667	0.445833333	0.579166667	0.5125	0.245833333
25/02/2003 14:00:00	0.4375	0.154166667	0.775	0.5	1.041666667	0.825	0.570833333	0.570833333	0.229166667	0.445833333	0.579166667	0.5125	0.245833333
25/02/2003 15:00:00	0.4375	0.154166667	0.775	0.5	1.041666667	0.825	0.570833333	0.570833333	0.229166667	0.445833333	0.579166667	0.5125	0.245833333
25/02/2003 16:00:00	0.4375	0.154166667	0.775	0.5	1.041666667	0.825	0.570833333	0.570833333	0.229166667	0.445833333	0.579166667	0.5125	0.245833333
25/02/2003 17:00:00	0.4375	0.154166667	0.775	0.5	1.041666667	0.825	0.570833333	0.570833333	0.229166667	0.445833333	0.579166667	0.5125	0.245833333
25/02/2003 18:00:00	0.4375	0.154166667	0.775	0.5	1.041666667	0.825	0.570833333	0.570833333	0.229166667	0.445833333	0.579166667	0.5125	0.245833333
25/02/2003 19:00:00	0.4375	0.154166667	0.775	0.5	1.041666667	0.825	0.570833333	0.570833333	0.229166667	0.445833333	0.579166667	0.5125	0.245833333
25/02/2003 20:00:00	0.4375	0.154166667	0.775	0.5	1.041666667	0.825	0.570833333	0.570833333	0.229166667	0.445833333	0.579166667	0.5125	0.245833333
25/02/2003 21:00:00	0.4375	0.154166667	0.775	0.5	1.041666667	0.825	0.570833333	0.570833333	0.229166667	0.445833333	0.579166667	0.5125	0.245833333
25/02/2003 22:00:00	0.4375	0.154166667	0.775	0.5	1.041666667	0.825	0.570833333	0.570833333	0.229166667	0.445833333	0.579166667	0.5125	0.245833333
25/02/2003 23:00:00	0.4375	0.154166667	0.775	0.5	1.041666667	0.825	0.570833333	0.570833333	0.229166667	0.445833333	0.579166667	0.5125	0.245833333
26/02/2003 00:00:00	0	0	0	0	0	0	0.029166667	0.008333333	0	0	0.008333333	0	0
26/02/2003 01:00:00	0	0	0	0	0	0	0.029166667	0.008333333	0	0	0.008333333	0	0
26/02/2003 02:00:00	0	0	0	0	0	0	0.029166667	0.008333333	0	0	0.008333333	0	0
26/02/2003 03:00:00	0	0	0	0	0	0	0.029166667	0.008333333	0	0	0.008333333	0	0
26/02/2003 04:00:00	0	0	0	0	0	0	0.029166667	0.008333333	0	0	0.008333333	0	0
26/02/2003 05:00:00	0	0	0	0	0	0	0.029166667	0.008333333	0	0	0.008333333	0	0
26/02/2003 06:00:00	0	0	0	0	0	0	0.029166667	0.008333333	0	0	0.008333333	0	0
26/02/2003 07:00:00	0	0	0	0	0	0	0.029166667	0.008333333	0	0	0.008333333	0	0
26/02/2003 08:00:00	0	0	0	0	0	0	0.029166667	0.008333333	0	0	0.008333333	0	0
26/02/2003 09:00:00	0	0	0	0	0	0	0.029166667	0.008333333	0	0	0.008333333	0	0
26/02/2003 10:00:00	0	0	0	0	0	0	0.029166667	0.008333333	0	0	0.008333333	0	0
26/02/2003 11:00:00	0	0	0	0	0	0	0.029166667	0.008333333	0	0	0.008333333	0	0
26/02/2003 12:00:00	0	0	0	0	0	0	0.029166667	0.008333333	0	0	0.008333333	0	0
26/02/2003 13:00:00	0	0	0	0	0	0	0.029166667	0.008333333	0	0	0.008333333	0	0
26/02/2003 14:00:00	0	0	0	0	0	0	0.029166667	0.008333333	0	0	0.008333333	0	0
26/02/2003 15:00:00	0	0	0	0	0	0	0.029166667	0.008333333	0	0	0.008333333	0	0
26/02/2003 16:00:00	0	0	0	0	0	0	0.029166667	0.008333333	0	0	0.008333333	0	0
26/02/2003 17:00:00	0	0	0	0	0	0	0.029166667	0.008333333	0	0	0.008333333	0	0
26/02/2003 18:00:00	0	0	0	0	0	0	0.029166667	0.008333333	0	0	0.008333333	0	0
26/02/2003 19:00:00	0	0	0	0	0	0	0.029166667	0.008333333	0	0	0.008333333	0	0
26/02/2003 20:00:00	0	0	0	0	0	0	0.029166667	0.008333333	0	0	0.008333333	0	0
26/02/2003 21:00:00	0	0	0	0	0	0	0.029166667	0.008333333	0	0	0.008333333	0	0
26/02/2003 22:00:00	0	0	0	0	0	0	0.029166667	0.008333333	0	0	0.008333333	0	0
26/02/2003 23:00:00	0	0	0	0	0	0	0.029166667	0.008333333	0	0	0.008333333	0	0
27/02/2003 00:00:00	0.291666667	0.133333333	0.15	0.179166667	0.195833333	0.195833333	0.366666667	0.283333333	0.375	0.441666667	0.25	0.179166667	0.291666667
27/02/2003 01:00:00	0.291666667	0.133333333	0.15	0.179166667	0.195833333	0.195833333	0.366666667	0.283333333	0.375	0.441666667	0.25	0.179166667	0.291666667
27/02/2003 02:00:00	0.291666667	0.133333333	0.15	0.179166667	0.195833333	0.195833333	0.366666667	0.283333333	0.375	0.441666667	0.25	0.179166667	0.291666667
27/02/2003 03:00:00	0.291666667	0.133333333	0.15	0.179166667	0.195833333	0.195833333	0.366666667	0.283333333	0.375	0.441666667	0.25	0.179166667	0.291666667
27/02/2003 04:00:00	0.291666667	0.133333333	0.15	0.179166667	0.195833333	0.195833333	0.366666667	0.283333333	0.375	0.441666667	0.25	0.179166667	0.291666667
27/02/2003 05:00:00	0.291666667	0.133333333	0.15	0.179166667	0.195833333	0.195833333	0.366666667	0.283333333	0.375	0.441666667	0.25	0.179166667	0.291666667
27/02/2003 06:00:00	0.291666667	0.133333333	0.15	0.179166667	0.195833333	0.195833333	0.366666667	0.283333333	0.375	0.441666667	0.25	0.179166667	0.291666667
27/02/2003 07:00:00	0.291666667	0.133333333	0.15	0.179166667	0.195833333	0.195833333	0.366666667	0.283333333	0.375	0.441666667	0.25	0.179166667	0.291666667
27/02/2003 08:00:00	0.291666667	0.133333333	0.15	0.179166667	0.195833333	0.195833333	0.366666667	0.283333333	0.375	0.441666667	0.25	0.179166667	0.291666667
27/02/2003 09:00:00	0.291666667	0.133333333	0.15	0.179166667	0.195833333	0.195833333	0.366666667	0.283333333	0.375	0.441666667	0.25	0.179166667	0.291666667
27/02/2003 10:00:00	0.291666667	0.133333333	0.15	0.179166667	0.195833333	0.195833333	0.366666667	0.283333333	0.375	0.441666667	0.25	0.179166667	0.291666667
27/02/2003 11:00:00	0.291666667	0.133333333	0.15	0.179166667	0.195833333	0.195833333	0.366666667	0.283333333	0.375	0.441666667	0.25	0.179166667	0.291666667
27/02/2003 12:00:00	0.291666667	0.133333333	0.15	0.179166667	0.195833333	0.195833333	0.366666667	0.283333333	0.375	0.441666667	0.25	0.179166667	0.291666667
27/02/2003 13:00:00	0.291666667	0.133333333	0.15	0.179166667	0.195833333	0.195833333	0.366666667	0.283333333	0.375	0.441666667	0.25	0.179166667	0.291666667
27/02/2003 14:00:00	0.291666667	0.133333333	0.15	0.179166667	0.195833333	0.195833333	0.366666667	0.283333333	0.375	0.441666667	0.25	0.179166667	0.291666667
27/02/2003 15:00:00	0.291666667	0.133333333	0.15	0.179166667	0.195833333	0.195833333	0.366666667	0.283333333	0.375	0.441666667	0.25	0.179166667	0.291666667
27/02/2003 16:00:00	0.291666667	0.133333333	0.15	0.179166667	0.195833333	0.195833333	0.366666667	0.283333333	0.375	0.441666667	0.25	0.179166667	0.291666667
27/02/2003 17:00:00	0.291666667	0.133333333	0.15	0.179166667	0.195833333	0.195833333	0.366666667	0.283333333	0.375	0.441666667	0.25	0.179166667	0.291666667
27/02/2003 18:00:00	0.291666667	0.133333333	0.15	0.179166667	0.195833333	0.195833333	0.366666667	0.283333333	0.375	0.441666667	0.25	0.179166667	0.291666667
27/02/2003 19:00:00	0.291666667	0.133333333	0.15	0.179166667	0.195833333	0.195833333	0.366666667	0.283333333	0.375	0.441666667	0.25	0.179166667	0.291666667
27/02/2003 20:00:00	0.291666667	0.133333333	0.15	0.179166667	0.195833333	0.195833333	0.366666667	0.283333333	0.375	0.441666667	0.25	0.179166667	0.291666667
27/02/2003 21:00:00	0.291666667	0.133333333	0.15	0.179166667	0.195833333	0.195833333	0.366666667	0.283333333	0.375	0.441666667	0.25	0.179166667	0.291666667
27/02/2003 22:00:00	0.291666667	0.133333333	0.15	0.179166667	0.195833333	0.195833333	0.366666667	0.283333333	0.375	0.441666667	0.25	0.179166667	0.291666667
27/02/2003 23:00:00	0.291666667	0.133333333	0.15	0.179166667	0.195833333	0.195833333	0.366666667	0.283333333	0.375	0.441666667	0.25	0.179166667	0.291666667
28/02/2003 00:00:00	0	0	0.029166667	0	0.0875	0	0.1375	0.1375	0.2625	0.091666667	0.291666667	0.108333333	0.291666667
28/02/2003 01:00:00	0	0	0.029166667	0	0.0875	0	0.1375	0.1375	0.2625	0.091666667	0.291666667	0.108333333	0.291666667
28/02/2003 02:00:00	0	0	0.029166667	0	0.0875	0	0.1375	0.1375	0.2625	0.091666667	0.291666667	0.108333333	0.291666667
28/02/2003 03:00:00	0	0	0.029166667	0	0.0875	0	0.1375	0.1375	0.2625	0.091666667	0.291666667	0.108333333	0.291666667
28/02/2003 04:00:00	0	0	0.029166667	0	0.0875	0	0.1375	0.1375	0.2625	0.091666667	0.291666667	0.108333333	0.291666667
28/02/2003 05:00:00	0	0	0.029166667	0	0.0875	0	0.1375	0.1375	0.2625	0.091666667	0.291666667	0.108333333	0.291666667
28/02/2003 06:00:00	0	0	0.029166667	0	0.0875	0	0.1375	0.1375	0.2625	0.091666667	0.291666667	0.108333333	0.291666667
28/02/2003 07:00:00	0	0	0.029166667	0	0.0875	0	0.1375	0.1375	0.2625	0.091666667	0.291666667	0.108333333	0.291666667
28/02/2003 08:00:00	0	0	0.029166667	0	0.0875	0	0.1375	0.1375	0.2625	0.091666667	0.291666667	0.108333333	0.291666667
28/02/2003 09:00:00	0	0	0.029166667	0	0.0875	0	0.1375	0.1375	0.2625	0.091666667	0.291666667	0.108333333	0.291666667
28/02/2003 10:00:00	0	0	0.029166667	0	0.0875	0	0.1375	0.1375	0.2625	0.091666667	0.291666667	0.108333333	0.291666667
28/02/2003 11:00:00	0	0	0.029166667	0	0.0875	0	0.1375	0.1375	0.2625	0.091666667	0.291666667	0.108333333	0.291666667
28/02/2003 12:00:00	0	0	0.029166667	0	0.0875	0	0.1375	0.1375	0.2625	0.091666667	0.291666667	0.108333333	0.291666667
28/02/2003 13:00:00	0	0	0.029166667	0	0.0875	0	0.1375	0.1375	0.2625	0.091666667	0.291666667	0.108333333	0.291666667
28/02/2003 14:00:00	0	0	0.029166667	0	0.0875	0	0.1375	0.1375	0.2625	0.091666667	0.291666667	0.108333333	0.291666667
28/02/2003 15:00:00	0	0	0.029166667	0	0.0875	0	0.1375	0.1375	0.2625	0.091666667	0.291666667	0.108333333	0.291666667
28/02/2003 16:00:00	0	0	0.029166667	0	0.0875	0	0.1375	0.1375	0.2625	0.091666667	0.291666667	0.108333333	0.291666667
28/02/2003 17:00:00	0	0	0.029166667	0	0.0875	0	0.1375	0.1375	0.2625	0.091666667	0.291666667	0.108333333	0.291666667
28/02/2003 18:00:00	0	0	0.029166667	0	0.0875	0	0.1375	0.1375	0.2625	0.091666667	0.291666667	0.108333333	0.291666667
28/02/2003 19:00:00	0	0	0.029166667	0	0.0875	0	0.1375	0.1375	0.2625	0.091666667	0.291666667	0.108333333	0.291666667
28/02/2003 20:00:00	0	0	0.029166667	0	0.0875	0	0.1375	0.1375	0.2625	0.091666667	0.291666667	0.108333333	0.291666667
28/02/2003 21:00:00	0	0	0.029166667	0	0.0875	0	0.1375	0.1375	0.2625	0.091666667	0.291666667	0.108333333	0.291666667
28/02/2003 22:00:00	0	0	0.029166667	0	0.0875	0	0.1375	0.1375	0.2625	0.091666667	0.291666667	0.108333333	0.291666667
28/02/2003 23:00:00	0	0	0.029166667	0	0.0875	0	0.1375	0.1375	0.2625	0.091666667	0.291666667	0.108333333	0.291666667
01/03/2003 00:00:00	0	0	0.091666667	0	0	0	0	0	0.020833333	0	0	0	0
01/03/2003 01:00:00	0	0	0.091666667	0	0	0	0	0	0.020833333	0	0	0	0
01/03/2003 02:00:00	0	0	0.091666667	0	0	0	0	0	0.020833333	0	0	0	0
01/03/2003 03:00:00	0	0	0.091666667	0	0	0	0	0	0.020833333	0	0	0	0
01/03/2003 04:00:00	0	0	0.091666667	0	0	0	0	0	0.020833333	0	0	0	0
01/03/2003 05:00:00	0	0	0.091666667	0	0	0	0	0	0.020833333	0	0	0	0
01/03/2003 06:00:00	0	0	0.091666667	0	0	0	0	0	0.020833333	0	0	0	0
01/03/2003 07:00:00	0	0	0.091666667	0	0	0	0	0	0.020833333	0	0	0	0
01/03/2003 08:00:00	0	0	0.091666667	0	0	0	0	0	0.020833333	0	0	0	0
01/03/2003 09:00:00	0	0	0.091666667	0	0	0	0	0	0.020833333	0	0	0	0
01/03/2003 10:00:00	0	0	0.091666667	0	0	0	0	0	0.020833333	0	0	0	0
01/03/2003 11:00:00	0	0	0.091666667	0	0	0	0	0	0.020833333	0	0	0	0
01/03/2003 12:00:00	0	0	0.091666667	0	0	0	0	0	0.020833333	0	0	0	0
01/03/2003 13:00:00	0	0	0.091666667	0	0	0	0	0	0.020833333	0	0	0	0
01/03/2003 14:00:00	0	0	0.091666667	0	0	0	0	0	0.020833333	0	0	0	0
01/03/2003 15:00:00	0	0	0.091666667	0	0	0	0	0	0.020833333	0	0	0	0
01/03/2003 16:00:00	0	0	0.091666667	0	0	0	0	0	0.020833333	0	0	0	0
01/03/2003 17:00:00	0	0	0.091666667	0	0	0	0	0	0.020833333	0	0	0	0
01/03/2003 18:00:00	0	0	0.091666667	0	0	0	0	0	0.020833333	0	0	0	0
01/03/2003 19:00:00	0	0	0.091666667	0	0	0	0	0	0.020833333	0	0	0	0
01/03/2003 20:00:00	0	0	0.091666667	0	0	0	0	0	0.020833333	0	0	0	0
01/03/2003 21:00:00	0	0	0.091666667	0	0	0	0	0	0.020833333	0	0	0	0
01/03/2003 22:00:00	0	0	0.091666667	0	0	0	0	0	0.020833333	0	0	0	0
01/03/2003 23:00:00	0	0	0.091666667	0	0	0	0	0	0.020833333	0	0	0	0
02/03/2003 00:00:00	0.066666667	0.2125	0	0.133333333	0.066666667	0.0625	0.054166667	0.079166667	0.233333333	0.179166667	0.229166667	0.141666667	0.383333333
02/03/2003 01:00:00	0.066666667	0.2125	0	0.133333333	0.066666667	0.0625	0.054166667	0.079166667	0.233333333	0.179166667	0.229166667	0.141666667	0.383333333
02/03/2003 02:00:00	0.066666667	0.2125	0	0.133333333	0.066666667	0.0625	0.054166667	0.079166667	0.233333333	0.179166667	0.229166667	0.141666667	0.383333333
02/03/2003 03:00:00	0.066666667	0.2125	0	0.133333333	0.066666667	0.0625	0.054166667	0.079166667	0.233333333	0.179166667	0.229166667	0.141666667	0.383333333
02/03/2003 04:00:00	0.066666667	0.2125	0	0.133333333	0.066666667	0.0625	0.054166667	0.079166667	0.233333333	0.179166667	0.229166667	0.141666667	0.383333333
02/03/2003 05:00:00	0.066666667	0.2125	0	0.133333333	0.066666667	0.0625	0.054166667	0.079166667	0.233333333	0.179166667	0.229166667	0.141666667	0.383333333
02/03/2003 06:00:00	0.066666667	0.2125	0	0.133333333	0.066666667	0.0625	0.054166667	0.079166667	0.233333333	0.179166667	0.229166667	0.141666667	0.383333333
02/03/2003 07:00:00	0.066666667	0.2125	0	0.133333333	0.066666667	0.0625	0.054166667	0.079166667	0.233333333	0.179166667	0.229166667	0.141666667	0.383333333
02/03/2003 08:00:00	0.066666667	0.2125	0	0.133333333	0.066666667	0.0625	0.054166667	0.079166667	0.233333333	0.179166667	0.229166667	0.141666667	0.383333333
02/03/2003 09:00:00	0.066666667	0.2125	0	0.133333333	0.066666667	0.0625	0.054166667	0.079166667	0.233333333	0.179166667	0.229166667	0.141666667	0.383333333
02/03/2003 10:00:00	0.066666667	0.2125	0	0.133333333	0.066666667	0.0625	0.054166667	0.079166667	0.233333333	0.179166667	0.229166667	0.141666667	0.383333333
02/03/2003 11:00:00	0.066666667	0.2125	0	0.133333333	0.066666667	0.0625	0.054166667	0.079166667	0.233333333	0.179166667	0.229166667	0.141666667	0.383333333
02/03/2003 12:00:00	0.066666667	0.2125	0	0.133333333	0.066666667	0.0625	0.054166667	0.079166667	0.233333333	0.179166667	0.229166667	0.141666667	0.383333333
02/03/2003 13:00:00	0.066666667	0.2125	0	0.133333333	0.066666667	0.0625	0.054166667	0.079166667	0.233333333	0.179166667	0.229166667	0.141666667	0.383333333
02/03/2003 14:00:00	0.066666667	0.2125	0	0.133333333	0.066666667	0.0625	0.054166667	0.079166667	0.233333333	0.179166667	0.229166667	0.141666667	0.383333333
02/03/2003 15:00:00	0.066666667	0.2125	0	0.133333333	0.066666667	0.0625	0.054166667	0.079166667	0.233333333	0.179166667	0.229166667	0.141666667	0.383333333
02/03/2003 16:00:00	0.066666667	0.2125	0	0.133333333	0.066666667	0.0625	0.054166667	0.079166667	0.233333333	0.179166667	0.229166667	0.141666667	0.383333333
02/03/2003 17:00:00	0.066666667	0.2125	0	0.133333333	0.066666667	0.0625	0.054166667	0.079166667	0.233333333	0.179166667	0.229166667	0.141666667	0.383333333
02/03/2003 18:00:00	0.066666667	0.2125	0	0.133333333	0.066666667	0.0625	0.054166667	0.079166667	0.233333333	0.179166667	0.229166667	0.141666667	0.383333333
02/03/2003 19:00:00	0.066666667	0.2125	0	0.133333333	0.066666667	0.0625	0.054166667	0.079166667	0.233333333	0.179166667	0.229166667	0.141666667	0.383333333
02/03/2003 20:00:00	0.066666667	0.2125	0	0.133333333	0.066666667	0.0625	0.054166667	0.079166667	0.233333333	0.179166667	0.229166667	0.141666667	0.383333333
02/03/2003 21:00:00	0.066666667	0.2125	0	0.133333333	0.066666667	0.0625	0.054166667	0.079166667	0.233333333	0.179166667	0.229166667	0.141666667	0.383333333
02/03/2003 22:00:00	0.066666667	0.2125	0	0.133333333	0.066666667	0.0625	0.054166667	0.079166667	0.233333333	0.179166667	0.229166667	0.141666667	0.383333333
02/03/2003 23:00:00	0.066666667	0.2125	0	0.133333333	0.066666667	0.0625	0.054166667	0.079166667	0.233333333	0.179166667	0.229166667	0.141666667	0.383333333
03/03/2003 00:00:00	0.1875	0.025	0.0625	0.054166667	0.104166667	0.05	0.120833333	0.120833333	0.016666667	0.075	0.116666667	0.1	0
03/03/2003 01:00:00	0.1875	0.025	0.0625	0.054166667	0.104166667	0.05	0.120833333	0.120833333	0.016666667	0.075	0.116666667	0.1	0
03/03/2003 02:00:00	0.1875	0.025	0.0625	0.054166667	0.104166667	0.05	0.120833333	0.120833333	0.016666667	0.075	0.116666667	0.1	0
03/03/2003 03:00:00	0.1875	0.025	0.0625	0.054166667	0.104166667	0.05	0.120833333	0.120833333	0.016666667	0.075	0.116666667	0.1	0
03/03/2003 04:00:00	0.1875	0.025	0.0625	0.054166667	0.104166667	0.05	0.120833333	0.120833333	0.016666667	0.075	0.116666667	0.1	0
03/03/2003 05:00:00	0.1875	0.025	0.0625	0.054166667	0.104166667	0.05	0.120833333	0.120833333	0.016666667	0.075	0.116666667	0.1	0
03/03/2003 06:00:00	0.1875	0.025	0.0625	0.054166667	0.104166667	0.05	0.120833333	0.120833333	0.016666667	0.075	0.116666667	0.1	0
03/03/2003 07:00:00	0.1875	0.025	0.0625	0.054166667	0.104166667	0.05	0.120833333	0.120833333	0.016666667	0.075	0.116666667	0.1	0
03/03/2003 08:00:00	0.1875	0.025	0.0625	0.054166667	0.104166667	0.05	0.120833333	0.120833333	0.016666667	0.075	0.116666667	0.1	0
03/03/2003 09:00:00	0.1875	0.025	0.0625	0.054166667	0.104166667	0.05	0.120833333	0.120833333	0.016666667	0.075	0.116666667	0.1	0
03/03/2003 10:00:00	0.1875	0.025	0.0625	0.054166667	0.104166667	0.05	0.120833333	0.120833333	0.016666667	0.075	0.116666667	0.1	0
03/03/2003 11:00:00	0.1875	0.025	0.0625	0.054166667	0.104166667	0.05	0.120833333	0.120833333	0.016666667	0.075	0.116666667	0.1	0
03/03/2003 12:00:00	0.1875	0.025	0.0625	0.054166667	0.104166667	0.05	0.120833333	0.120833333	0.016666667	0.075	0.116666667	0.1	0
03/03/2003 13:00:00	0.1875	0.025	0.0625	0.054166667	0.104166667	0.05	0.120833333	0.120833333	0.016666667	0.075	0.116666667	0.1	0
03/03/2003 14:00:00	0.1875	0.025	0.0625	0.054166667	0.104166667	0.05	0.120833333	0.120833333	0.016666667	0.075	0.116666667	0.1	0
03/03/2003 15:00:00	0.1875	0.025	0.0625	0.054166667	0.104166667	0.05	0.120833333	0.120833333	0.016666667	0.075	0.116666667	0.1	0
03/03/2003 16:00:00	0.1875	0.025	0.0625	0.054166667	0.104166667	0.05	0.120833333	0.120833333	0.016666667	0.075	0.116666667	0.1	0
03/03/2003 17:00:00	0.1875	0.025	0.0625	0.054166667	0.104166667	0.05	0.120833333	0.120833333	0.016666667	0.075	0.116666667	0.1	0
03/03/2003 18:00:00	0.1875	0.025	0.0625	0.054166667	0.104166667	0.05	0.120833333	0.120833333	0.016666667	0.075	0.116666667	0.1	0
03/03/2003 19:00:00	0.1875	0.025	0.0625	0.054166667	0.104166667	0.05	0.120833333	0.120833333	0.016666667	0.075	0.116666667	0.1	0
03/03/2003 20:00:00	0.1875	0.025	0.0625	0.054166667	0.104166667	0.05	0.120833333	0.120833333	0.016666667	0.075	0.116666667	0.1	0
03/03/2003 21:00:00	0.1875	0.025	0.0625	0.054166667	0.104166667	0.05	0.120833333	0.120833333	0.016666667	0.075	0.116666667	0.1	0
03/03/2003 22:00:00	0.1875	0.025	0.0625	0.054166667	0.104166667	0.05	0.120833333	0.120833333	0.016666667	0.075	0.116666667	0.1	0
03/03/2003 23:00:00	0.1875	0.025	0.0625	0.054166667	0.104166667	0.05	0.120833333	0.120833333	0.016666667	0.075	0.116666667	0.1	0
04/03/2003 00:00:00	0.683333333	0.329166667	0.504166667	0.5625	0.5125	0.495833333	0.55	0.508333333	0.566666667	0.525	0.466666667	0.454166667	0.504166667
04/03/2003 01:00:00	0.683333333	0.329166667	0.504166667	0.5625	0.5125	0.495833333	0.55	0.508333333	0.566666667	0.525	0.466666667	0.454166667	0.504166667
04/03/2003 02:00:00	0.683333333	0.329166667	0.504166667	0.5625	0.5125	0.495833333	0.55	0.508333333	0.566666667	0.525	0.466666667	0.454166667	0.504166667
04/03/2003 03:00:00	0.683333333	0.329166667	0.504166667	0.5625	0.5125	0.495833333	0.55	0.508333333	0.566666667	0.525	0.466666667	0.454166667	0.504166667
04/03/2003 04:00:00	0.683333333	0.329166667	0.504166667	0.5625	0.5125	0.495833333	0.55	0.508333333	0.566666667	0.525	0.466666667	0.454166667	0.504166667
04/03/2003 05:00:00	0.683333333	0.329166667	0.504166667	0.5625	0.5125	0.495833333	0.55	0.508333333	0.566666667	0.525	0.466666667	0.454166667	0.504166667
04/03/2003 06:00:00	0.683333333	0.329166667	0.504166667	0.5625	0.5125	0.495833333	0.55	0.508333333	0.566666667	0.525	0.466666667	0.454166667	0.504166667
04/03/2003 07:00:00	0.683333333	0.329166667	0.504166667	0.5625	0.5125	0.495833333	0.55	0.508333333	0.566666667	0.525	0.466666667	0.454166667	0.504166667
04/03/2003 08:00:00	0.683333333	0.329166667	0.504166667	0.5625	0.5125	0.495833333	0.55	0.508333333	0.566666667	0.525	0.466666667	0.454166667	0.504166667
04/03/2003 09:00:00	0.683333333	0.329166667	0.504166667	0.5625	0.5125	0.495833333	0.55	0.508333333	0.566666667	0.525	0.466666667	0.454166667	0.504166667
04/03/2003 10:00:00	0.683333333	0.329166667	0.504166667	0.5625	0.5125	0.495833333	0.55	0.508333333	0.566666667	0.525	0.466666667	0.454166667	0.504166667
04/03/2003 11:00:00	0.683333333	0.329166667	0.504166667	0.5625	0.5125	0.495833333	0.55	0.508333333	0.566666667	0.525	0.466666667	0.454166667	0.504166667
04/03/2003 12:00:00	0.683333333	0.329166667	0.504166667	0.5625	0.5125	0.495833333	0.55	0.508333333	0.566666667	0.525	0.466666667	0.454166667	0.504166667
04/03/2003 13:00:00	0.683333333	0.329166667	0.504166667	0.5625	0.5125	0.495833333	0.55	0.508333333	0.566666667	0.525	0.466666667	0.454166667	0.504166667
04/03/2003 14:00:00	0.683333333	0.329166667	0.504166667	0.5625	0.5125	0.495833333	0.55	0.508333333	0.566666667	0.525	0.466666667	0.454166667	0.504166667
04/03/2003 15:00:00	0.683333333	0.329166667	0.504166667	0.5625	0.5125	0.495833333	0.55	0.508333333	0.566666667	0.525	0.466666667	0.454166667	0.504166667
04/03/2003 16:00:00	0.683333333	0.329166667	0.504166667	0.5625	0.5125	0.495833333	0.55	0.508333333	0.566666667	0.525	0.466666667	0.454166667	0.504166667
04/03/2003 17:00:00	0.683333333	0.329166667	0.504166667	0.5625	0.5125	0.495833333	0.55	0.508333333	0.566666667	0.525	0.466666667	0.454166667	0.504166667
04/03/2003 18:00:00	0.683333333	0.329166667	0.504166667	0.5625	0.5125	0.495833333	0.55	0.508333333	0.566666667	0.525	0.466666667	0.454166667	0.504166667
04/03/2003 19:00:00	0.683333333	0.329166667	0.504166667	0.5625	0.5125	0.495833333	0.55	0.508333333	0.566666667	0.525	0.466666667	0.454166667	0.504166667
04/03/2003 20:00:00	0.683333333	0.329166667	0.504166667	0.5625	0.5125	0.495833333	0.55	0.508333333	0.566666667	0.525	0.466666667	0.454166667	0.504166667
04/03/2003 21:00:00	0.683333333	0.329166667	0.504166667	0.5625	0.5125	0.495833333	0.55	0.508333333	0.566666667	0.525	0.466666667	0.454166667	0.504166667
04/03/2003 22:00:00	0.683333333	0.329166667	0.504166667	0.5625	0.5125	0.495833333	0.55	0.508333333	0.566666667	0.525	0.466666667	0.454166667	0.504166667
04/03/2003 23:00:00	0.683333333	0.329166667	0.504166667	0.5625	0.5125	0.495833333	0.55	0.508333333	0.566666667	0.525	0.466666667	0.454166667	0.504166667
05/03/2003 00:00:00	0.108333333	0.075	0.054166667	0.179166667	0.1625	0.108333333	0.175	0.2125	0.2125	0.195833333	0.179166667	0.275	0.329166667
05/03/2003 01:00:00	0.108333333	0.075	0.054166667	0.179166667	0.1625	0.108333333	0.175	0.2125	0.2125	0.195833333	0.179166667	0.275	0.329166667
05/03/2003 02:00:00	0.108333333	0.075	0.054166667	0.179166667	0.1625	0.108333333	0.175	0.2125	0.2125	0.195833333	0.179166667	0.275	0.329166667
05/03/2003 03:00:00	0.108333333	0.075	0.054166667	0.179166667	0.1625	0.108333333	0.175	0.2125	0.2125	0.195833333	0.179166667	0.275	0.329166667
05/03/2003 04:00:00	0.108333333	0.075	0.054166667	0.179166667	0.1625	0.108333333	0.175	0.2125	0.2125	0.195833333	0.179166667	0.275	0.329166667
05/03/2003 05:00:00	0.108333333	0.075	0.054166667	0.179166667	0.1625	0.108333333	0.175	0.2125	0.2125	0.195833333	0.179166667	0.275	0.329166667
05/03/2003 06:00:00	0.108333333	0.075	0.054166667	0.179166667	0.1625	0.108333333	0.175	0.2125	0.2125	0.195833333	0.179166667	0.275	0.329166667
05/03/2003 07:00:00	0.108333333	0.075	0.054166667	0.179166667	0.1625	0.108333333	0.175	0.2125	0.2125	0.195833333	0.179166667	0.275	0.329166667
05/03/2003 08:00:00	0.108333333	0.075	0.054166667	0.179166667	0.1625	0.108333333	0.175	0.2125	0.2125	0.195833333	0.179166667	0.275	0.329166667
05/03/2003 09:00:00	0.108333333	0.075	0.054166667	0.179166667	0.1625	0.108333333	0.175	0.2125	0.2125	0.195833333	0.179166667	0.275	0.329166667
05/03/2003 10:00:00	0.108333333	0.075	0.054166667	0.179166667	0.1625	0.108333333	0.175	0.2125	0.2125	0.195833333	0.179166667	0.275	0.329166667
05/03/2003 11:00:00	0.108333333	0.075	0.054166667	0.179166667	0.1625	0.108333333	0.175	0.2125	0.2125	0.195833333	0.179166667	0.275	0.329166667
05/03/2003 12:00:00	0.108333333	0.075	0.054166667	0.179166667	0.1625	0.108333333	0.175	0.2125	0.2125	0.195833333	0.179166667	0.275	0.329166667
05/03/2003 13:00:00	0.108333333	0.075	0.054166667	0.179166667	0.1625	0.108333333	0.175	0.2125	0.2125	0.195833333	0.179166667	0.275	0.329166667
05/03/2003 14:00:00	0.108333333	0.075	0.054166667	0.179166667	0.1625	0.108333333	0.175	0.2125	0.2125	0.195833333	0.179166667	0.275	0.329166667
05/03/2003 15:00:00	0.108333333	0.075	0.054166667	0.179166667	0.1625	0.108333333	0.175	0.2125	0.2125	0.195833333	0.179166667	0.275	0.329166667
05/03/2003 16:00:00	0.108333333	0.075	0.054166667	0.179166667	0.1625	0.108333333	0.175	0.2125	0.2125	0.195833333	0.179166667	0.275	0.329166667
05/03/2003 17:00:00	0.108333333	0.075	0.054166667	0.179166667	0.1625	0.108333333	0.175	0.2125	0.2125	0.195833333	0.179166667	0.275	0.329166667
05/03/2003 18:00:00	0.108333333	0.075	0.054166667	0.179166667	0.1625	0.108333333	0.175	0.2125	0.2125	0.195833333	0.179166667	0.275	0.329166667
05/03/2003 19:00:00	0.108333333	0.075	0.054166667	0.179166667	0.1625	0.108333333	0.175	0.2125	0.2125	0.195833333	0.179166667	0.275	0.329166667
05/03/2003 20:00:00	0.108333333	0.075	0.054166667	0.179166667	0.1625	0.108333333	0.175	0.2125	0.2125	0.195833333	0.179166667	0.275	0.329166667
05/03/2003 21:00:00	0.108333333	0.075	0.054166667	0.179166667	0.1625	0.108333333	0.175	0.2125	0.2125	0.195833333	0.179166667	0.275	0.329166667
05/03/2003 22:00:00	0.108333333	0.075	0.054166667	0.179166667	0.1625	0.108333333	0.175	0.2125	0.2125	0.195833333	0.179166667	0.275	0.329166667
05/03/2003 23:00:00	0.108333333	0.075	0.054166667	0.179166667	0.1625	0.108333333	0.175	0.2125	0.2125	0.195833333	0.179166667	0.275	0.329166667
06/03/2003 00:00:00	0	0	0	0	0	0	0	0	0	0	0	0	0
06/03/2003 01:00:00	0	0	0	0	0	0	0	0	0	0	0	0	0
06/03/2003 02:00:00	0	0	0	0	0	0	0	0	0	0	0	0	0
06/03/2003 03:00:00	0	0	0	0	0	0	0	0	0	0	0	0	0
06/03/2003 04:00:00	0	0	0	0	0	0	0	0	0	0	0	0	0
06/03/2003 05:00:00	0	0	0	0	0	0	0	0	0	0	0	0	0
06/03/2003 06:00:00	0	0	0	0	0	0	0	0	0	0	0	0	0
06/03/2003 07:00:00	0	0	0	0	0	0	0	0	0	0	0	0	0
06/03/2003 08:00:00	0	0	0	0	0	0	0	0	0	0	0	0	0
06/03/2003 09:00:00	0	0	0	0	0	0	0	0	0	0	0	0	0
06/03/2003 10:00:00	0	0	0	0	0	0	0	0	0	0	0	0	0
06/03/2003 11:00:00	0	0	0	0	0	0	0	0	0	0	0	0	0
06/03/2003 12:00:00	0	0	0	0	0	0	0	0	0	0	0	0	0
06/03/2003 13:00:00	0	0	0	0	0	0	0	0	0	0	0	0	0
06/03/2003 14:00:00	0	0	0	0	0	0	0	0	0	0	0	0	0
06/03/2003 15:00:00	0	0	0	0	0	0	0	0	0	0	0	0	0
06/03/2003 16:00:00	0	0	0	0	0	0	0	0	0	0	0	0	0
06/03/2003 17:00:00	0	0	0	0	0	0	0	0	0	0	0	0	0
06/03/2003 18:00:00	0	0	0	0	0	0	0	0	0	0	0	0	0
06/03/2003 19:00:00	0	0	0	0	0	0	0	0	0	0	0	0	0
06/03/2003 20:00:00	0	0	0	0	0	0	0	0	0	0	0	0	0
06/03/2003 21:00:00	0	0	0	0	0	0	0	0	0	0	0	0	0
06/03/2003 22:00:00	0	0	0	0	0	0	0	0	0	0	0	0	0
06/03/2003 23:00:00	0	0	0	0	0	0	0	0	0	0	0	0	0
07/03/2003 00:00:00	0	0	0	0	0	0	0	0	0	0	0	0	0
07/03/2003 01:00:00	0	0	0	0	0	0	0	0	0	0	0	0	0
07/03/2003 02:00:00	0	0	0	0	0	0	0	0	0	0	0	0	0
07/03/2003 03:00:00	0	0	0	0	0	0	0	0	0	0	0	0	0
07/03/2003 04:00:00	0	0	0	0	0	0	0	0	0	0	0	0	0
07/03/2003 05:00:00	0	0	0	0	0	0	0	0	0	0	0	0	0
07/03/2003 06:00:00	0	0	0	0	0	0	0	0	0	0	0	0	0
07/03/2003 07:00:00	0	0	0	0	0	0	0	0	0	0	0	0	0
07/03/2003 08:00:00	0	0	0	0	0	0	0	0	0	0	0	0	0
07/03/2003 09:00:00	0	0	0	0	0	0	0	0	0	0	0	0	0
07/03/2003 10:00:00	0	0	0	0	0	0	0	0	0	0	0	0	0
07/03/2003 11:00:00	0	0	0	0	0	0	0	0	0	0	0	0	0
07/03/2003 12:00:00	0	0	0	0	0	0	0	0	0	0	0	0	0
07/03/2003 13:00:00	0	0	0	0	0	0	0	0	0	0	0	0	0
07/03/2003 14:00:00	0	0	0	0	0	0	0	0	0	0	0	0	0
07/03/2003 15:00:00	0	0	0	0	0	0	0	0	0	0	0	0	0
07/03/2003 16:00:00	0	0	0	0	0	0	0	0	0	0	0	0	0
07/03/2003 17:00:00	0	0	0	0	0	0	0	0	0	0	0	0	0
07/03/2003 18:00:00	0	0	0	0	0	0	0	0	0	0	0	0	0
07/03/2003 19:00:00	0	0	0	0	0	0	0	0	0	0	0	0	0
07/03/2003 20:00:00	0	0	0	0	0	0	0	0	0	0	0	0	0
07/03/2003 21:00:00	0	0	0	0	0	0	0	0	0	0	0	0	0
07/03/2003 22:00:00	0	0	0	0	0	0	0	0	0	0	0	0	0
07/03/2003 23:00:00	0	0	0	0	0	0	0	0	0	0	0	0	0
08/03/2003 00:00:00	0	0	0	0	0	0	0	0	0	0	0	0	0
08/03/2003 01:00:00	0	0	0	0	0	0	0	0	0	0	0	0	0
08/03/2003 02:00:00	0	0	0	0	0	0	0	0	0	0	0	0	0
08/03/2003 03:00:00	0	0	0	0	0	0	0	0	0	0	0	0	0
08/03/2003 04:00:00	0	0	0	0	0	0	0	0	0	0	0	0	0
08/03/2003 05:00:00	0	0	0	0	0	0	0	0	0	0	0	0	0
08/03/2003 06:00:00	0	0	0	0	0	0	0	0	0	0	0	0	0
08/03/2003 07:00:00	0	0	0	0	0	0	0	0	0	0	0	0	0
08/03/2003 08:00:00	0	0	0	0	0	0	0	0	0	0	0	0	0
08/03/2003 09:00:00	0	0	0	0	0	0	0	0	0	0	0	0	0
08/03/2003 10:00:00	0	0	0	0	0	0	0	0	0	0	0	0	0
08/03/2003 11:00:00	0	0	0	0	0	0	0	0	0	0	0	0	0
08/03/2003 12:00:00	0	0	0	0	0	0	0	0	0	0	0	0	0
08/03/2003 13:00:00	0	0	0	0	0	0	0	0	0	0	0	0	0
08/03/2003 14:00:00	0	0	0	0	0	0	0	0	0	0	0	0	0
08/03/2003 15:00:00	0	0	0	0	0	0	0	0	0	0	0	0	0
08/03/2003 16:00:00	0	0	0	0	0	0	0	0	0	0	0	0	0
08/03/2003 17:00:00	0	0	0	0	0	0	0	0	0	0	0	0	0
08/03/2003 18:00:00	0	0	0	0	0	0	0	0	0	0	0	0	0
08/03/2003 19:00:00	0	0	0	0	0	0	0	0	0	0	0	0	0
08/03/2003 20:00:00	0	0	0	0	0	0	0	0	0	0	0	0	0
08/03/2003 21:00:00	0	0	0	0	0	0	0	0	0	0	0	0	0
08/03/2003 22:00:00	0	0	0	0	0	0	0	0	0	0	0	0	0
08/03/2003 23:00:00	0	0	0	0	0	0	0	0	0	0	0	0	0
09/03/2003 00:00:00	0	0	0	0	0	0	0.008333333	0	0	0	0	0	0
09/03/2003 01:00:00	0	0	0	0	0	0	0.008333333	0	0	0	0	0	0
09/03/2003 02:00:00	0	0	0	0	0	0	0.008333333	0	0	0	0	0	0
09/03/2003 03:00:00	0	0	0	0	0	0	0.008333333	0	0	0	0	0	0
09/03/2003 04:00:00	0	0	0	0	0	0	0.008333333	0	0	0	0	0	0
09/03/2003 05:00:00	0	0	0	0	0	0	0.008333333	0	0	0	0	0	0
09/03/2003 06:00:00	0	0	0	0	0	0	0.008333333	0	0	0	0	0	0
09/03/2003 07:00:00	0	0	0	0	0	0	0.008333333	0	0	0	0	0	0
09/03/2003 08:00:00	0	0	0	0	0	0	0.008333333	0	0	0	0	0	0
09/03/2003 09:00:00	0	0	0	0	0	0	0.008333333	0	0	0	0	0	0
09/03/2003 10:00:00	0	0	0	0	0	0	0.008333333	0	0	0	0	0	0
09/03/2003 11:00:00	0	0	0	0	0	0	0.008333333	0	0	0	0	0	0
09/03/2003 12:00:00	0	0	0	0	0	0	0.008333333	0	0	0	0	0	0
09/03/2003 13:00:00	0	0	0	0	0	0	0.008333333	0	0	0	0	0	0
09/03/2003 14:00:00	0	0	0	0	0	0	0.008333333	0	0	0	0	0	0
09/03/2003 15:00:00	0	0	0	0	0	0	0.008333333	0	0	0	0	0	0
09/03/2003 16:00:00	0	0	0	0	0	0	0.008333333	0	0	0	0	0	0
09/03/2003 17:00:00	0	0	0	0	0	0	0.008333333	0	0	0	0	0	0
09/03/2003 18:00:00	0	0	0	0	0	0	0.008333333	0	0	0	0	0	0
09/03/2003 19:00:00	0	0	0	0	0	0	0.008333333	0	0	0	0	0	0
09/03/2003 20:00:00	0	0	0	0	0	0	0.008333333	0	0	0	0	0	0
09/03/2003 21:00:00	0	0	0	0	0	0	0.008333333	0	0	0	0	0	0
09/03/2003 22:00:00	0	0	0	0	0	0	0.008333333	0	0	0	0	0	0
09/03/2003 23:00:00	0	0	0	0	0	0	0.008333333	0	0	0	0	0	0
10/03/2003 00:00:00	0	0	0	0	0	0	0	0.029166667	0	0	0	0	0
10/03/2003 01:00:00	0	0	0	0	0	0	0	0.029166667	0	0	0	0	0
10/03/2003 02:00:00	0	0	0	0	0	0	0	0.029166667	0	0	0	0	0
10/03/2003 03:00:00	0	0	0	0	0	0	0	0.029166667	0	0	0	0	0
10/03/2003 04:00:00	0	0	0	0	0	0	0	0.029166667	0	0	0	0	0
10/03/2003 05:00:00	0	0	0	0	0	0	0	0.029166667	0	0	0	0	0
10/03/2003 06:00:00	0	0	0	0	0	0	0	0.029166667	0	0	0	0	0
10/03/2003 07:00:00	0	0	0	0	0	0	0	0.029166667	0	0	0	0	0
10/03/2003 08:00:00	0	0	0	0	0	0	0	0.029166667	0	0	0	0	0
10/03/2003 09:00:00	0	0	0	0	0	0	0	0.029166667	0	0	0	0	0
10/03/2003 10:00:00	0	0	0	0	0	0	0	0.029166667	0	0	0	0	0
10/03/2003 11:00:00	0	0	0	0	0	0	0	0.029166667	0	0	0	0	0
10/03/2003 12:00:00	0	0	0	0	0	0	0	0.029166667	0	0	0	0	0
10/03/2003 13:00:00	0	0	0	0	0	0	0	0.029166667	0	0	0	0	0
10/03/2003 14:00:00	0	0	0	0	0	0	0	0.029166667	0	0	0	0	0
10/03/2003 15:00:00	0	0	0	0	0	0	0	0.029166667	0	0	0	0	0
10/03/2003 16:00:00	0	0	0	0	0	0	0	0.029166667	0	0	0	0	0
10/03/2003 17:00:00	0	0	0	0	0	0	0	0.029166667	0	0	0	0	0
10/03/2003 18:00:00	0	0	0	0	0	0	0	0.029166667	0	0	0	0	0
10/03/2003 19:00:00	0	0	0	0	0	0	0	0.029166667	0	0	0	0	0
10/03/2003 20:00:00	0	0	0	0	0	0	0	0.029166667	0	0	0	0	0
10/03/2003 21:00:00	0	0	0	0	0	0	0	0.029166667	0	0	0	0	0
10/03/2003 22:00:00	0	0	0	0	0	0	0	0.029166667	0	0	0	0	0
10/03/2003 23:00:00	0	0	0	0	0	0	0	0.029166667	0	0	0	0	0
11/03/2003 00:00:00	0.016666667	0.016666667	0	0.0375	0.016666667	0	0	0.033333333	0.0375	0.0125	0.020833333	0.0125	0.025
11/03/2003 01:00:00	0.016666667	0.016666667	0	0.0375	0.016666667	0	0	0.033333333	0.0375	0.0125	0.020833333	0.0125	0.025
11/03/2003 02:00:00	0.016666667	0.016666667	0	0.0375	0.016666667	0	0	0.033333333	0.0375	0.0125	0.020833333	0.0125	0.025
11/03/2003 03:00:00	0.016666667	0.016666667	0	0.0375	0.016666667	0	0	0.033333333	0.0375	0.0125	0.020833333	0.0125	0.025
11/03/2003 04:00:00	0.016666667	0.016666667	0	0.0375	0.016666667	0	0	0.033333333	0.0375	0.0125	0.020833333	0.0125	0.025
11/03/2003 05:00:00	0.016666667	0.016666667	0	0.0375	0.016666667	0	0	0.033333333	0.0375	0.0125	0.020833333	0.0125	0.025
11/03/2003 06:00:00	0.016666667	0.016666667	0	0.0375	0.016666667	0	0	0.033333333	0.0375	0.0125	0.020833333	0.0125	0.025
11/03/2003 07:00:00	0.016666667	0.016666667	0	0.0375	0.016666667	0	0	0.033333333	0.0375	0.0125	0.020833333	0.0125	0.025
11/03/2003 08:00:00	0.016666667	0.016666667	0	0.0375	0.016666667	0	0	0.033333333	0.0375	0.0125	0.020833333	0.0125	0.025
11/03/2003 09:00:00	0.016666667	0.016666667	0	0.0375	0.016666667	0	0	0.033333333	0.0375	0.0125	0.020833333	0.0125	0.025
11/03/2003 10:00:00	0.016666667	0.016666667	0	0.0375	0.016666667	0	0	0.033333333	0.0375	0.0125	0.020833333	0.0125	0.025
11/03/2003 11:00:00	0.016666667	0.016666667	0	0.0375	0.016666667	0	0	0.033333333	0.0375	0.0125	0.020833333	0.0125	0.025
11/03/2003 12:00:00	0.016666667	0.016666667	0	0.0375	0.016666667	0	0	0.033333333	0.0375	0.0125	0.020833333	0.0125	0.025
11/03/2003 13:00:00	0.016666667	0.016666667	0	0.0375	0.016666667	0	0	0.033333333	0.0375	0.0125	0.020833333	0.0125	0.025
11/03/2003 14:00:00	0.016666667	0.016666667	0	0.0375	0.016666667	0	0	0.033333333	0.0375	0.0125	0.020833333	0.0125	0.025
11/03/2003 15:00:00	0.016666667	0.016666667	0	0.0375	0.016666667	0	0	0.033333333	0.0375	0.0125	0.020833333	0.0125	0.025
11/03/2003 16:00:00	0.016666667	0.016666667	0	0.0375	0.016666667	0	0	0.033333333	0.0375	0.0125	0.020833333	0.0125	0.025
11/03/2003 17:00:00	0.016666667	0.016666667	0	0.0375	0.016666667	0	0	0.033333333	0.0375	0.0125	0.020833333	0.0125	0.025
11/03/2003 18:00:00	0.016666667	0.016666667	0	0.0375	0.016666667	0	0	0.033333333	0.0375	0.0125	0.020833333	0.0125	0.025
11/03/2003 19:00:00	0.016666667	0.016666667	0	0.0375	0.016666667	0	0	0.033333333	0.0375	0.0125	0.020833333	0.0125	0.025
11/03/2003 20:00:00	0.016666667	0.016666667	0	0.0375	0.016666667	0	0	0.033333333	0.0375	0.0125	0.020833333	0.0125	0.025
11/03/2003 21:00:00	0.016666667	0.016666667	0	0.0375	0.016666667	0	0	0.033333333	0.0375	0.0125	0.020833333	0.0125	0.025
11/03/2003 22:00:00	0.016666667	0.016666667	0	0.0375	0.016666667	0	0	0.033333333	0.0375	0.0125	0.020833333	0.0125	0.025
11/03/2003 23:00:00	0.016666667	0.016666667	0	0.0375	0.016666667	0	0	0.033333333	0.0375	0.0125	0.020833333	0.0125	0.025
12/03/2003 00:00:00	0	0	0	0	0	0	0	0	0	0	0	0	0
12/03/2003 01:00:00	0	0	0	0	0	0	0	0	0	0	0	0	0
12/03/2003 02:00:00	0	0	0	0	0	0	0	0	0	0	0	0	0
12/03/2003 03:00:00	0	0	0	0	0	0	0	0	0	0	0	0	0
12/03/2003 04:00:00	0	0	0	0	0	0	0	0	0	0	0	0	0
12/03/2003 05:00:00	0	0	0	0	0	0	0	0	0	0	0	0	0
12/03/2003 06:00:00	0	0	0	0	0	0	0	0	0	0	0	0	0
12/03/2003 07:00:00	0	0	0	0	0	0	0	0	0	0	0	0	0
12/03/2003 08:00:00	0	0	0	0	0	0	0	0	0	0	0	0	0
12/03/2003 09:00:00	0	0	0	0	0	0	0	0	0	0	0	0	0
12/03/2003 10:00:00	0	0	0	0	0	0	0	0	0	0	0	0	0
12/03/2003 11:00:00	0	0	0	0	0	0	0	0	0	0	0	0	0
12/03/2003 12:00:00	0	0	0	0	0	0	0	0	0	0	0	0	0
12/03/2003 13:00:00	0	0	0	0	0	0	0	0	0	0	0	0	0
12/03/2003 14:00:00	0	0	0	0	0	0	0	0	0	0	0	0	0
12/03/2003 15:00:00	0	0	0	0	0	0	0	0	0	0	0	0	0
12/03/2003 16:00:00	0	0	0	0	0	0	0	0	0	0	0	0	0
12/03/2003 17:00:00	0	0	0	0	0	0	0	0	0	0	0	0	0
12/03/2003 18:00:00	0	0	0	0	0	0	0	0	0	0	0	0	0
12/03/2003 19:00:00	0	0	0	0	0	0	0	0	0	0	0	0	0
12/03/2003 20:00:00	0	0	0	0	0	0	0	0	0	0	0	0	0
12/03/2003 21:00:00	0	0	0	0	0	0	0	0	0	0	0	0	0
12/03/2003 22:00:00	0	0	0	0	0	0	0	0	0	0	0	0	0
12/03/2003 23:00:00	0	0	0	0	0	0	0	0	0	0	0	0	0
13/03/2003 00:00:00	0.929166667	0.645833333	0.154166667	0.695833333	0.870833333	0.720833333	1.2875	0.908333333	0.595833333	0.483333333	0.616666667	0.645833333	0.566666667
13/03/2003 01:00:00	0.929166667	0.645833333	0.154166667	0.695833333	0.870833333	0.720833333	1.2875	0.908333333	0.595833333	0.483333333	0.616666667	0.645833333	0.566666667
13/03/2003 02:00:00	0.929166667	0.645833333	0.154166667	0.695833333	0.870833333	0.720833333	1.2875	0.908333333	0.595833333	0.483333333	0.616666667	0.645833333	0.566666667
13/03/2003 03:00:00	0.929166667	0.645833333	0.154166667	0.695833333	0.870833333	0.720833333	1.2875	0.908333333	0.595833333	0.483333333	0.616666667	0.645833333	0.566666667
13/03/2003 04:00:00	0.929166667	0.645833333	0.154166667	0.695833333	0.870833333	0.720833333	1.2875	0.908333333	0.595833333	0.483333333	0.616666667	0.645833333	0.566666667
13/03/2003 05:00:00	0.929166667	0.645833333	0.154166667	0.695833333	0.870833333	0.720833333	1.2875	0.908333333	0.595833333	0.483333333	0.616666667	0.645833333	0.566666667
13/03/2003 06:00:00	0.929166667	0.645833333	0.154166667	0.695833333	0.870833333	0.720833333	1.2875	0.908333333	0.595833333	0.483333333	0.616666667	0.645833333	0.566666667
13/03/2003 07:00:00	0.929166667	0.645833333	0.154166667	0.695833333	0.870833333	0.720833333	1.2875	0.908333333	0.595833333	0.483333333	0.616666667	0.645833333	0.566666667
13/03/2003 08:00:00	0.929166667	0.645833333	0.154166667	0.695833333	0.870833333	0.720833333	1.2875	0.908333333	0.595833333	0.483333333	0.616666667	0.645833333	0.566666667
13/03/2003 09:00:00	0.929166667	0.645833333	0.154166667	0.695833333	0.870833333	0.720833333	1.2875	0.908333333	0.595833333	0.483333333	0.616666667	0.645833333	0.566666667
13/03/2003 10:00:00	0.929166667	0.645833333	0.154166667	0.695833333	0.870833333	0.720833333	1.2875	0.908333333	0.595833333	0.483333333	0.616666667	0.645833333	0.566666667
13/03/2003 11:00:00	0.929166667	0.645833333	0.154166667	0.695833333	0.870833333	0.720833333	1.2875	0.908333333	0.595833333	0.483333333	0.616666667	0.645833333	0.566666667
13/03/2003 12:00:00	0.929166667	0.645833333	0.154166667	0.695833333	0.870833333	0.720833333	1.2875	0.908333333	0.595833333	0.483333333	0.616666667	0.645833333	0.566666667
13/03/2003 13:00:00	0.929166667	0.645833333	0.154166667	0.695833333	0.870833333	0.720833333	1.2875	0.908333333	0.595833333	0.483333333	0.616666667	0.645833333	0.566666667
13/03/2003 14:00:00	0.929166667	0.645833333	0.154166667	0.695833333	0.870833333	0.720833333	1.2875	0.908333333	0.595833333	0.483333333	0.616666667	0.645833333	0.566666667
13/03/2003 15:00:00	0.929166667	0.645833333	0.154166667	0.695833333	0.870833333	0.720833333	1.2875	0.908333333	0.595833333	0.483333333	0.616666667	0.645833333	0.566666667
13/03/2003 16:00:00	0.929166667	0.645833333	0.154166667	0.695833333	0.870833333	0.720833333	1.2875	0.908333333	0.595833333	0.483333333	0.616666667	0.645833333	0.566666667
13/03/2003 17:00:00	0.929166667	0.645833333	0.154166667	0.695833333	0.870833333	0.720833333	1.2875	0.908333333	0.595833333	0.483333333	0.616666667	0.645833333	0.566666667
13/03/2003 18:00:00	0.929166667	0.645833333	0.154166667	0.695833333	0.870833333	0.720833333	1.2875	0.908333333	0.595833333	0.483333333	0.616666667	0.645833333	0.566666667
13/03/2003 19:00:00	0.929166667	0.645833333	0.154166667	0.695833333	0.870833333	0.720833333	1.2875	0.908333333	0.595833333	0.483333333	0.616666667	0.645833333	0.566666667
13/03/2003 20:00:00	0.929166667	0.645833333	0.154166667	0.695833333	0.870833333	0.720833333	1.2875	0.908333333	0.595833333	0.483333333	0.616666667	0.645833333	0.566666667
13/03/2003 21:00:00	0.929166667	0.645833333	0.154166667	0.695833333	0.870833333	0.720833333	1.2875	0.908333333	0.595833333	0.483333333	0.616666667	0.645833333	0.566666667
13/03/2003 22:00:00	0.929166667	0.645833333	0.154166667	0.695833333	0.870833333	0.720833333	1.2875	0.908333333	0.595833333	0.483333333	0.616666667	0.645833333	0.566666667
13/03/2003 23:00:00	0.929166667	0.645833333	0.154166667	0.695833333	0.870833333	0.720833333	1.2875	0.908333333	0.595833333	0.483333333	0.616666667	0.645833333	0.566666667
14/03/2003 00:00:00	0.145833333	0.466666667	0.091666667	0.608333333	0.741666667	0.75	0.804166667	0.8375	0.95	1.604166667	0.908333333	0.616666667	1.075
14/03/2003 01:00:00	0.145833333	0.466666667	0.091666667	0.608333333	0.741666667	0.75	0.804166667	0.8375	0.95	1.604166667	0.908333333	0.616666667	1.075
14/03/2003 02:00:00	0.145833333	0.466666667	0.091666667	0.608333333	0.741666667	0.75	0.804166667	0.8375	0.95	1.604166667	0.908333333	0.616666667	1.075
14/03/2003 03:00:00	0.145833333	0.466666667	0.091666667	0.608333333	0.741666667	0.75	0.804166667	0.8375	0.95	1.604166667	0.908333333	0.616666667	1.075
14/03/2003 04:00:00	0.145833333	0.466666667	0.091666667	0.608333333	0.741666667	0.75	0.804166667	0.8375	0.95	1.604166667	0.908333333	0.616666667	1.075
14/03/2003 05:00:00	0.145833333	0.466666667	0.091666667	0.608333333	0.741666667	0.75	0.804166667	0.8375	0.95	1.604166667	0.908333333	0.616666667	1.075
14/03/2003 06:00:00	0.145833333	0.466666667	0.091666667	0.608333333	0.741666667	0.75	0.804166667	0.8375	0.95	1.604166667	0.908333333	0.616666667	1.075
14/03/2003 07:00:00	0.145833333	0.466666667	0.091666667	0.608333333	0.741666667	0.75	0.804166667	0.8375	0.95	1.604166667	0.908333333	0.616666667	1.075
14/03/2003 08:00:00	0.145833333	0.466666667	0.091666667	0.608333333	0.741666667	0.75	0.804166667	0.8375	0.95	1.604166667	0.908333333	0.616666667	1.075
14/03/2003 09:00:00	0.145833333	0.466666667	0.091666667	0.608333333	0.741666667	0.75	0.804166667	0.8375	0.95	1.604166667	0.908333333	0.616666667	1.075
14/03/2003 10:00:00	0.145833333	0.466666667	0.091666667	0.608333333	0.741666667	0.75	0.804166667	0.8375	0.95	1.604166667	0.908333333	0.616666667	1.075
14/03/2003 11:00:00	0.145833333	0.466666667	0.091666667	0.608333333	0.741666667	0.75	0.804166667	0.8375	0.95	1.604166667	0.908333333	0.616666667	1.075
14/03/2003 12:00:00	0.145833333	0.466666667	0.091666667	0.608333333	0.741666667	0.75	0.804166667	0.8375	0.95	1.604166667	0.908333333	0.616666667	1.075
14/03/2003 13:00:00	0.145833333	0.466666667	0.091666667	0.608333333	0.741666667	0.75	0.804166667	0.8375	0.95	1.604166667	0.908333333	0.616666667	1.075
14/03/2003 14:00:00	0.145833333	0.466666667	0.091666667	0.608333333	0.741666667	0.75	0.804166667	0.8375	0.95	1.604166667	0.908333333	0.616666667	1.075
14/03/2003 15:00:00	0.145833333	0.466666667	0.091666667	0.608333333	0.741666667	0.75	0.804166667	0.8375	0.95	1.604166667	0.908333333	0.616666667	1.075
14/03/2003 16:00:00	0.145833333	0.466666667	0.091666667	0.608333333	0.741666667	0.75	0.804166667	0.8375	0.95	1.604166667	0.908333333	0.616666667	1.075
14/03/2003 17:00:00	0.145833333	0.466666667	0.091666667	0.608333333	0.741666667	0.75	0.804166667	0.8375	0.95	1.604166667	0.908333333	0.616666667	1.075
14/03/2003 18:00:00	0.145833333	0.466666667	0.091666667	0.608333333	0.741666667	0.75	0.804166667	0.8375	0.95	1.604166667	0.908333333	0.616666667	1.075
14/03/2003 19:00:00	0.145833333	0.466666667	0.091666667	0.608333333	0.741666667	0.75	0.804166667	0.8375	0.95	1.604166667	0.908333333	0.616666667	1.075
14/03/2003 20:00:00	0.145833333	0.466666667	0.091666667	0.608333333	0.741666667	0.75	0.804166667	0.8375	0.95	1.604166667	0.908333333	0.616666667	1.075
14/03/2003 21:00:00	0.145833333	0.466666667	0.091666667	0.608333333	0.741666667	0.75	0.804166667	0.8375	0.95	1.604166667	0.908333333	0.616666667	1.075
14/03/2003 22:00:00	0.145833333	0.466666667	0.091666667	0.608333333	0.741666667	0.75	0.804166667	0.8375	0.95	1.604166667	0.908333333	0.616666667	1.075
14/03/2003 23:00:00	0.145833333	0.466666667	0.091666667	0.608333333	0.741666667	0.75	0.804166667	0.8375	0.95	1.604166667	0.908333333	0.616666667	1.075
15/03/2003 00:00:00	0.158333333	0.141666667	0.1875	0.15	0.620833333	0.645833333	0.758333333	0.729166667	0.8125	0.716666667	0.6875	0.733333333	1.283333333
15/03/2003 01:00:00	0.158333333	0.141666667	0.1875	0.15	0.620833333	0.645833333	0.758333333	0.729166667	0.8125	0.716666667	0.6875	0.733333333	1.283333333
15/03/2003 02:00:00	0.158333333	0.141666667	0.1875	0.15	0.620833333	0.645833333	0.758333333	0.729166667	0.8125	0.716666667	0.6875	0.733333333	1.283333333
15/03/2003 03:00:00	0.158333333	0.141666667	0.1875	0.15	0.620833333	0.645833333	0.758333333	0.729166667	0.8125	0.716666667	0.6875	0.733333333	1.283333333
15/03/2003 04:00:00	0.158333333	0.141666667	0.1875	0.15	0.620833333	0.645833333	0.758333333	0.729166667	0.8125	0.716666667	0.6875	0.733333333	1.283333333
15/03/2003 05:00:00	0.158333333	0.141666667	0.1875	0.15	0.620833333	0.645833333	0.758333333	0.729166667	0.8125	0.716666667	0.6875	0.733333333	1.283333333
15/03/2003 06:00:00	0.158333333	0.141666667	0.1875	0.15	0.620833333	0.645833333	0.758333333	0.729166667	0.8125	0.716666667	0.6875	0.733333333	1.283333333
15/03/2003 07:00:00	0.158333333	0.141666667	0.1875	0.15	0.620833333	0.645833333	0.758333333	0.729166667	0.8125	0.716666667	0.6875	0.733333333	1.283333333
15/03/2003 08:00:00	0.158333333	0.141666667	0.1875	0.15	0.620833333	0.645833333	0.758333333	0.729166667	0.8125	0.716666667	0.6875	0.733333333	1.283333333
15/03/2003 09:00:00	0.158333333	0.141666667	0.1875	0.15	0.620833333	0.645833333	0.758333333	0.729166667	0.8125	0.716666667	0.6875	0.733333333	1.283333333
15/03/2003 10:00:00	0.158333333	0.141666667	0.1875	0.15	0.620833333	0.645833333	0.758333333	0.729166667	0.8125	0.716666667	0.6875	0.733333333	1.283333333
15/03/2003 11:00:00	0.158333333	0.141666667	0.1875	0.15	0.620833333	0.645833333	0.758333333	0.729166667	0.8125	0.716666667	0.6875	0.733333333	1.283333333
15/03/2003 12:00:00	0.158333333	0.141666667	0.1875	0.15	0.620833333	0.645833333	0.758333333	0.729166667	0.8125	0.716666667	0.6875	0.733333333	1.283333333
15/03/2003 13:00:00	0.158333333	0.141666667	0.1875	0.15	0.620833333	0.645833333	0.758333333	0.729166667	0.8125	0.716666667	0.6875	0.733333333	1.283333333
15/03/2003 14:00:00	0.158333333	0.141666667	0.1875	0.15	0.620833333	0.645833333	0.758333333	0.729166667	0.8125	0.716666667	0.6875	0.733333333	1.283333333
15/03/2003 15:00:00	0.158333333	0.141666667	0.1875	0.15	0.620833333	0.645833333	0.758333333	0.729166667	0.8125	0.716666667	0.6875	0.733333333	1.283333333
15/03/2003 16:00:00	0.158333333	0.141666667	0.1875	0.15	0.620833333	0.645833333	0.758333333	0.729166667	0.8125	0.716666667	0.6875	0.733333333	1.283333333
15/03/2003 17:00:00	0.158333333	0.141666667	0.1875	0.15	0.620833333	0.645833333	0.758333333	0.729166667	0.8125	0.716666667	0.6875	0.733333333	1.283333333
15/03/2003 18:00:00	0.158333333	0.141666667	0.1875	0.15	0.620833333	0.645833333	0.758333333	0.729166667	0.8125	0.716666667	0.6875	0.733333333	1.283333333
15/03/2003 19:00:00	0.158333333	0.141666667	0.1875	0.15	0.620833333	0.645833333	0.758333333	0.729166667	0.8125	0.716666667	0.6875	0.733333333	1.283333333
15/03/2003 20:00:00	0.158333333	0.141666667	0.1875	0.15	0.620833333	0.645833333	0.758333333	0.729166667	0.8125	0.716666667	0.6875	0.733333333	1.283333333
15/03/2003 21:00:00	0.158333333	0.141666667	0.1875	0.15	0.620833333	0.645833333	0.758333333	0.729166667	0.8125	0.716666667	0.6875	0.733333333	1.283333333
15/03/2003 22:00:00	0.158333333	0.141666667	0.1875	0.15	0.620833333	0.645833333	0.758333333	0.729166667	0.8125	0.716666667	0.6875	0.733333333	1.283333333
15/03/2003 23:00:00	0.158333333	0.141666667	0.1875	0.15	0.620833333	0.645833333	0.758333333	0.729166667	0.8125	0.716666667	0.6875	0.733333333	1.283333333
16/03/2003 00:00:00	0.279166667	0.245833333	0.2875	0.175	0.670833333	0.395833333	1.075	1.0625	0.258333333	0.283333333	0.654166667	0.958333333	0.183333333
16/03/2003 01:00:00	0.279166667	0.245833333	0.2875	0.175	0.670833333	0.395833333	1.075	1.0625	0.258333333	0.283333333	0.654166667	0.958333333	0.183333333
16/03/2003 02:00:00	0.279166667	0.245833333	0.2875	0.175	0.670833333	0.395833333	1.075	1.0625	0.258333333	0.283333333	0.654166667	0.958333333	0.183333333
16/03/2003 03:00:00	0.279166667	0.245833333	0.2875	0.175	0.670833333	0.395833333	1.075	1.0625	0.258333333	0.283333333	0.654166667	0.958333333	0.183333333
16/03/2003 04:00:00	0.279166667	0.245833333	0.2875	0.175	0.670833333	0.395833333	1.075	1.0625	0.258333333	0.283333333	0.654166667	0.958333333	0.183333333
16/03/2003 05:00:00	0.279166667	0.245833333	0.2875	0.175	0.670833333	0.395833333	1.075	1.0625	0.258333333	0.283333333	0.654166667	0.958333333	0.183333333
16/03/2003 06:00:00	0.279166667	0.245833333	0.2875	0.175	0.670833333	0.395833333	1.075	1.0625	0.258333333	0.283333333	0.654166667	0.958333333	0.183333333
16/03/2003 07:00:00	0.279166667	0.245833333	0.2875	0.175	0.670833333	0.395833333	1.075	1.0625	0.258333333	0.283333333	0.654166667	0.958333333	0.183333333
16/03/2003 08:00:00	0.279166667	0.245833333	0.2875	0.175	0.670833333	0.395833333	1.075	1.0625	0.258333333	0.283333333	0.654166667	0.958333333	0.183333333
16/03/2003 09:00:00	0.279166667	0.245833333	0.2875	0.175	0.670833333	0.395833333	1.075	1.0625	0.258333333	0.283333333	0.654166667	0.958333333	0.183333333
16/03/2003 10:00:00	0.279166667	0.245833333	0.2875	0.175	0.670833333	0.395833333	1.075	1.0625	0.258333333	0.283333333	0.654166667	0.958333333	0.183333333
16/03/2003 11:00:00	0.279166667	0.245833333	0.2875	0.175	0.670833333	0.395833333	1.075	1.0625	0.258333333	0.283333333	0.654166667	0.958333333	0.183333333
16/03/2003 12:00:00	0.279166667	0.245833333	0.2875	0.175	0.670833333	0.395833333	1.075	1.0625	0.258333333	0.283333333	0.654166667	0.958333333	0.183333333
16/03/2003 13:00:00	0.279166667	0.245833333	0.2875	0.175	0.670833333	0.395833333	1.075	1.0625	0.258333333	0.283333333	0.654166667	0.958333333	0.183333333
16/03/2003 14:00:00	0.279166667	0.245833333	0.2875	0.175	0.670833333	0.395833333	1.075	1.0625	0.258333333	0.283333333	0.654166667	0.958333333	0.183333333
16/03/2003 15:00:00	0.279166667	0.245833333	0.2875	0.175	0.670833333	0.395833333	1.075	1.0625	0.258333333	0.283333333	0.654166667	0.958333333	0.183333333
16/03/2003 16:00:00	0.279166667	0.245833333	0.2875	0.175	0.670833333	0.395833333	1.075	1.0625	0.258333333	0.283333333	0.654166667	0.958333333	0.183333333
16/03/2003 17:00:00	0.279166667	0.245833333	0.2875	0.175	0.670833333	0.395833333	1.075	1.0625	0.258333333	0.283333333	0.654166667	0.958333333	0.183333333
16/03/2003 18:00:00	0.279166667	0.245833333	0.2875	0.175	0.670833333	0.395833333	1.075	1.0625	0.258333333	0.283333333	0.654166667	0.958333333	0.183333333
16/03/2003 19:00:00	0.279166667	0.245833333	0.2875	0.175	0.670833333	0.395833333	1.075	1.0625	0.258333333	0.283333333	0.654166667	0.958333333	0.183333333
16/03/2003 20:00:00	0.279166667	0.245833333	0.2875	0.175	0.670833333	0.395833333	1.075	1.0625	0.258333333	0.283333333	0.654166667	0.958333333	0.183333333
16/03/2003 21:00:00	0.279166667	0.245833333	0.2875	0.175	0.670833333	0.395833333	1.075	1.0625	0.258333333	0.283333333	0.654166667	0.958333333	0.183333333
16/03/2003 22:00:00	0.279166667	0.245833333	0.2875	0.175	0.670833333	0.395833333	1.075	1.0625	0.258333333	0.283333333	0.654166667	0.958333333	0.183333333
16/03/2003 23:00:00	0.279166667	0.245833333	0.2875	0.175	0.670833333	0.395833333	1.075	1.0625	0.258333333	0.283333333	0.654166667	0.958333333	0.183333333
17/03/2003 00:00:00	0.158333333	0.216666667	0.254166667	0.2875	0.233333333	0.158333333	0.325	0.308333333	0.395833333	0.55	0.216666667	0.141666667	0.375
17/03/2003 01:00:00	0.158333333	0.216666667	0.254166667	0.2875	0.233333333	0.158333333	0.325	0.308333333	0.395833333	0.55	0.216666667	0.141666667	0.375
17/03/2003 02:00:00	0.158333333	0.216666667	0.254166667	0.2875	0.233333333	0.158333333	0.325	0.308333333	0.395833333	0.55	0.216666667	0.141666667	0.375
17/03/2003 03:00:00	0.158333333	0.216666667	0.254166667	0.2875	0.233333333	0.158333333	0.325	0.308333333	0.395833333	0.55	0.216666667	0.141666667	0.375
17/03/2003 04:00:00	0.158333333	0.216666667	0.254166667	0.2875	0.233333333	0.158333333	0.325	0.308333333	0.395833333	0.55	0.216666667	0.141666667	0.375
17/03/2003 05:00:00	0.158333333	0.216666667	0.254166667	0.2875	0.233333333	0.158333333	0.325	0.308333333	0.395833333	0.55	0.216666667	0.141666667	0.375
17/03/2003 06:00:00	0.158333333	0.216666667	0.254166667	0.2875	0.233333333	0.158333333	0.325	0.308333333	0.395833333	0.55	0.216666667	0.141666667	0.375
17/03/2003 07:00:00	0.158333333	0.216666667	0.254166667	0.2875	0.233333333	0.158333333	0.325	0.308333333	0.395833333	0.55	0.216666667	0.141666667	0.375
17/03/2003 08:00:00	0.158333333	0.216666667	0.254166667	0.2875	0.233333333	0.158333333	0.325	0.308333333	0.395833333	0.55	0.216666667	0.141666667	0.375
17/03/2003 09:00:00	0.158333333	0.216666667	0.254166667	0.2875	0.233333333	0.158333333	0.325	0.308333333	0.395833333	0.55	0.216666667	0.141666667	0.375
17/03/2003 10:00:00	0.158333333	0.216666667	0.254166667	0.2875	0.233333333	0.158333333	0.325	0.308333333	0.395833333	0.55	0.216666667	0.141666667	0.375
17/03/2003 11:00:00	0.158333333	0.216666667	0.254166667	0.2875	0.233333333	0.158333333	0.325	0.308333333	0.395833333	0.55	0.216666667	0.141666667	0.375
17/03/2003 12:00:00	0.158333333	0.216666667	0.254166667	0.2875	0.233333333	0.158333333	0.325	0.308333333	0.395833333	0.55	0.216666667	0.141666667	0.375
17/03/2003 13:00:00	0.158333333	0.216666667	0.254166667	0.2875	0.233333333	0.158333333	0.325	0.308333333	0.395833333	0.55	0.216666667	0.141666667	0.375
17/03/2003 14:00:00	0.158333333	0.216666667	0.254166667	0.2875	0.233333333	0.158333333	0.325	0.308333333	0.395833333	0.55	0.216666667	0.141666667	0.375
17/03/2003 15:00:00	0.158333333	0.216666667	0.254166667	0.2875	0.233333333	0.158333333	0.325	0.308333333	0.395833333	0.55	0.216666667	0.141666667	0.375
17/03/2003 16:00:00	0.158333333	0.216666667	0.254166667	0.2875	0.233333333	0.158333333	0.325	0.308333333	0.395833333	0.55	0.216666667	0.141666667	0.375
17/03/2003 17:00:00	0.158333333	0.216666667	0.254166667	0.2875	0.233333333	0.158333333	0.325	0.308333333	0.395833333	0.55	0.216666667	0.141666667	0.375
17/03/2003 18:00:00	0.158333333	0.216666667	0.254166667	0.2875	0.233333333	0.158333333	0.325	0.308333333	0.395833333	0.55	0.216666667	0.141666667	0.375
17/03/2003 19:00:00	0.158333333	0.216666667	0.254166667	0.2875	0.233333333	0.158333333	0.325	0.308333333	0.395833333	0.55	0.216666667	0.141666667	0.375
17/03/2003 20:00:00	0.158333333	0.216666667	0.254166667	0.2875	0.233333333	0.158333333	0.325	0.308333333	0.395833333	0.55	0.216666667	0.141666667	0.375
17/03/2003 21:00:00	0.158333333	0.216666667	0.254166667	0.2875	0.233333333	0.158333333	0.325	0.308333333	0.395833333	0.55	0.216666667	0.141666667	0.375
17/03/2003 22:00:00	0.158333333	0.216666667	0.254166667	0.2875	0.233333333	0.158333333	0.325	0.308333333	0.395833333	0.55	0.216666667	0.141666667	0.375
17/03/2003 23:00:00	0.158333333	0.216666667	0.254166667	0.2875	0.233333333	0.158333333	0.325	0.308333333	0.395833333	0.55	0.216666667	0.141666667	0.375
18/03/2003 00:00:00	0	0	0	0	0	0	0	0	0	0	0	0	0
18/03/2003 01:00:00	0	0	0	0	0	0	0	0	0	0	0	0	0
18/03/2003 02:00:00	0	0	0	0	0	0	0	0	0	0	0	0	0
18/03/2003 03:00:00	0	0	0	0	0	0	0	0	0	0	0	0	0
18/03/2003 04:00:00	0	0	0	0	0	0	0	0	0	0	0	0	0
18/03/2003 05:00:00	0	0	0	0	0	0	0	0	0	0	0	0	0
18/03/2003 06:00:00	0	0	0	0	0	0	0	0	0	0	0	0	0
18/03/2003 07:00:00	0	0	0	0	0	0	0	0	0	0	0	0	0
18/03/2003 08:00:00	0	0	0	0	0	0	0	0	0	0	0	0	0
18/03/2003 09:00:00	0	0	0	0	0	0	0	0	0	0	0	0	0
18/03/2003 10:00:00	0	0	0	0	0	0	0	0	0	0	0	0	0
18/03/2003 11:00:00	0	0	0	0	0	0	0	0	0	0	0	0	0
18/03/2003 12:00:00	0	0	0	0	0	0	0	0	0	0	0	0	0
18/03/2003 13:00:00	0	0	0	0	0	0	0	0	0	0	0	0	0
18/03/2003 14:00:00	0	0	0	0	0	0	0	0	0	0	0	0	0
18/03/2003 15:00:00	0	0	0	0	0	0	0	0	0	0	0	0	0
18/03/2003 16:00:00	0	0	0	0	0	0	0	0	0	0	0	0	0
18/03/2003 17:00:00	0	0	0	0	0	0	0	0	0	0	0	0	0
18/03/2003 18:00:00	0	0	0	0	0	0	0	0	0	0	0	0	0
18/03/2003 19:00:00	0	0	0	0	0	0	0	0	0	0	0	0	0
18/03/2003 20:00:00	0	0	0	0	0	0	0	0	0	0	0	0	0
18/03/2003 21:00:00	0	0	0	0	0	0	0	0	0	0	0	0	0
18/03/2003 22:00:00	0	0	0	0	0	0	0	0	0	0	0	0	0
18/03/2003 23:00:00	0	0	0	0	0	0	0	0	0	0	0	0	0
19/03/2003 00:00:00	0	0	0	0	0	0	0	0	0	0	0	0	0
19/03/2003 01:00:00	0	0	0	0	0	0	0	0	0	0	0	0	0
19/03/2003 02:00:00	0	0	0	0	0	0	0	0	0	0	0	0	0
19/03/2003 03:00:00	0	0	0	0	0	0	0	0	0	0	0	0	0
19/03/2003 04:00:00	0	0	0	0	0	0	0	0	0	0	0	0	0
19/03/2003 05:00:00	0	0	0	0	0	0	0	0	0	0	0	0	0
19/03/2003 06:00:00	0	0	0	0	0	0	0	0	0	0	0	0	0
19/03/2003 07:00:00	0	0	0	0	0	0	0	0	0	0	0	0	0
19/03/2003 08:00:00	0	0	0	0	0	0	0	0	0	0	0	0	0
19/03/2003 09:00:00	0	0	0	0	0	0	0	0	0	0	0	0	0
19/03/2003 10:00:00	0	0	0	0	0	0	0	0	0	0	0	0	0
19/03/2003 11:00:00	0	0	0	0	0	0	0	0	0	0	0	0	0
19/03/2003 12:00:00	0	0	0	0	0	0	0	0	0	0	0	0	0
19/03/2003 13:00:00	0	0	0	0	0	0	0	0	0	0	0	0	0
19/03/2003 14:00:00	0	0	0	0	0	0	0	0	0	0	0	0	0
19/03/2003 15:00:00	0	0	0	0	0	0	0	0	0	0	0	0	0
19/03/2003 16:00:00	0	0	0	0	0	0	0	0	0	0	0	0	0
19/03/2003 17:00:00	0	0	0	0	0	0	0	0	0	0	0	0	0
19/03/2003 18:00:00	0	0	0	0	0	0	0	0	0	0	0	0	0
19/03/2003 19:00:00	0	0	0	0	0	0	0	0	0	0	0	0	0
19/03/2003 20:00:00	0	0	0	0	0	0	0	0	0	0	0	0	0
19/03/2003 21:00:00	0	0	0	0	0	0	0	0	0	0	0	0	0
19/03/2003 22:00:00	0	0	0	0	0	0	0	0	0	0	0	0	0
19/03/2003 23:00:00	0	0	0	0	0	0	0	0	0	0	0	0	0
20/03/2003 00:00:00	0	0	0	0	0	0	0	0	0	0	0	0	0
20/03/2003 01:00:00	0	0	0	0	0	0	0	0	0	0	0	0	0
20/03/2003 02:00:00	0	0	0	0	0	0	0	0	0	0	0	0	0
20/03/2003 03:00:00	0	0	0	0	0	0	0	0	0	0	0	0	0
20/03/2003 04:00:00	0	0	0	0	0	0	0	0	0	0	0	0	0
20/03/2003 05:00:00	0	0	0	0	0	0	0	0	0	0	0	0	0
20/03/2003 06:00:00	0	0	0	0	0	0	0	0	0	0	0	0	0
20/03/2003 07:00:00	0	0	0	0	0	0	0	0	0	0	0	0	0
20/03/2003 08:00:00	0	0	0	0	0	0	0	0	0	0	0	0	0
20/03/2003 09:00:00	0	0	0	0	0	0	0	0	0	0	0	0	0
20/03/2003 10:00:00	0	0	0	0	0	0	0	0	0	0	0	0	0
20/03/2003 11:00:00	0	0	0	0	0	0	0	0	0	0	0	0	0
20/03/2003 12:00:00	0	0	0	0	0	0	0	0	0	0	0	0	0
20/03/2003 13:00:00	0	0	0	0	0	0	0	0	0	0	0	0	0
20/03/2003 14:00:00	0	0	0	0	0	0	0	0	0	0	0	0	0
20/03/2003 15:00:00	0	0	0	0	0	0	0	0	0	0	0	0	0
20/03/2003 16:00:00	0	0	0	0	0	0	0	0	0	0	0	0	0
20/03/2003 17:00:00	0	0	0	0	0	0	0	0	0	0	0	0	0
20/03/2003 18:00:00	0	0	0	0	0	0	0	0	0	0	0	0	0
20/03/2003 19:00:00	0	0	0	0	0	0	0	0	0	0	0	0	0
20/03/2003 20:00:00	0	0	0	0	0	0	0	0	0	0	0	0	0
20/03/2003 21:00:00	0	0	0	0	0	0	0	0	0	0	0	0	0
20/03/2003 22:00:00	0	0	0	0	0	0	0	0	0	0	0	0	0
20/03/2003 23:00:00	0	0	0	0	0	0	0	0	0	0	0	0	0
21/03/2003 00:00:00	0	0	0	0	0	0	0	0	0	0	0	0	0
21/03/2003 01:00:00	0	0	0	0	0	0	0	0	0	0	0	0	0
21/03/2003 02:00:00	0	0	0	0	0	0	0	0	0	0	0	0	0
21/03/2003 03:00:00	0	0	0	0	0	0	0	0	0	0	0	0	0
21/03/2003 04:00:00	0	0	0	0	0	0	0	0	0	0	0	0	0
21/03/2003 05:00:00	0	0	0	0	0	0	0	0	0	0	0	0	0
21/03/2003 06:00:00	0	0	0	0	0	0	0	0	0	0	0	0	0
21/03/2003 07:00:00	0	0	0	0	0	0	0	0	0	0	0	0	0
21/03/2003 08:00:00	0	0	0	0	0	0	0	0	0	0	0	0	0
21/03/2003 09:00:00	0	0	0	0	0	0	0	0	0	0	0	0	0
21/03/2003 10:00:00	0	0	0	0	0	0	0	0	0	0	0	0	0
21/03/2003 11:00:00	0	0	0	0	0	0	0	0	0	0	0	0	0
21/03/2003 12:00:00	0	0	0	0	0	0	0	0	0	0	0	0	0
21/03/2003 13:00:00	0	0	0	0	0	0	0	0	0	0	0	0	0
21/03/2003 14:00:00	0	0	0	0	0	0	0	0	0	0	0	0	0
21/03/2003 15:00:00	0	0	0	0	0	0	0	0	0	0	0	0	0
21/03/2003 16:00:00	0	0	0	0	0	0	0	0	0	0	0	0	0
21/03/2003 17:00:00	0	0	0	0	0	0	0	0	0	0	0	0	0
21/03/2003 18:00:00	0	0	0	0	0	0	0	0	0	0	0	0	0
21/03/2003 19:00:00	0	0	0	0	0	0	0	0	0	0	0	0	0
21/03/2003 20:00:00	0	0	0	0	0	0	0	0	0	0	0	0	0
21/03/2003 21:00:00	0	0	0	0	0	0	0	0	0	0	0	0	0
21/03/2003 22:00:00	0	0	0	0	0	0	0	0	0	0	0	0	0
21/03/2003 23:00:00	0	0	0	0	0	0	0	0	0	0	0	0	0
22/03/2003 00:00:00	0	0	0	0	0	0	0	0	0	0	0	0	0
22/03/2003 01:00:00	0	0	0	0	0	0	0	0	0	0	0	0	0
22/03/2003 02:00:00	0	0	0	0	0	0	0	0	0	0	0	0	0
22/03/2003 03:00:00	0	0	0	0	0	0	0	0	0	0	0	0	0
22/03/2003 04:00:00	0	0	0	0	0	0	0	0	0	0	0	0	0
22/03/2003 05:00:00	0	0	0	0	0	0	0	0	0	0	0	0	0
22/03/2003 06:00:00	0	0	0	0	0	0	0	0	0	0	0	0	0
22/03/2003 07:00:00	0	0	0	0	0	0	0	0	0	0	0	0	0
22/03/2003 08:00:00	0	0	0	0	0	0	0	0	0	0	0	0	0
22/03/2003 09:00:00	0	0	0	0	0	0	0	0	0	0	0	0	0
22/03/2003 10:00:00	0	0	0	0	0	0	0	0	0	0	0	0	0
22/03/2003 11:00:00	0	0	0	0	0	0	0	0	0	0	0	0	0
22/03/2003 12:00:00	0	0	0	0	0	0	0	0	0	0	0	0	0
22/03/2003 13:00:00	0	0	0	0	0	0	0	0	0	0	0	0	0
22/03/2003 14:00:00	0	0	0	0	0	0	0	0	0	0	0	0	0
22/03/2003 15:00:00	0	0	0	0	0	0	0	0	0	0	0	0	0
22/03/2003 16:00:00	0	0	0	0	0	0	0	0	0	0	0	0	0
22/03/2003 17:00:00	0	0	0	0	0	0	0	0	0	0	0	0	0
22/03/2003 18:00:00	0	0	0	0	0	0	0	0	0	0	0	0	0
22/03/2003 19:00:00	0	0	0	0	0	0	0	0	0	0	0	0	0
22/03/2003 20:00:00	0	0	0	0	0	0	0	0	0	0	0	0	0
22/03/2003 21:00:00	0	0	0	0	0	0	0	0	0	0	0	0	0
22/03/2003 22:00:00	0	0	0	0	0	0	0	0	0	0	0	0	0
22/03/2003 23:00:00	0	0	0	0	0	0	0	0	0	0	0	0	0
23/03/2003 00:00:00	0	0	0	0	0	0	0	0	0	0	0	0	0
23/03/2003 01:00:00	0	0	0	0	0	0	0	0	0	0	0	0	0
23/03/2003 02:00:00	0	0	0	0	0	0	0	0	0	0	0	0	0
23/03/2003 03:00:00	0	0	0	0	0	0	0	0	0	0	0	0	0
23/03/2003 04:00:00	0	0	0	0	0	0	0	0	0	0	0	0	0
23/03/2003 05:00:00	0	0	0	0	0	0	0	0	0	0	0	0	0
23/03/2003 06:00:00	0	0	0	0	0	0	0	0	0	0	0	0	0
23/03/2003 07:00:00	0	0	0	0	0	0	0	0	0	0	0	0	0
23/03/2003 08:00:00	0	0	0	0	0	0	0	0	0	0	0	0	0
23/03/2003 09:00:00	0	0	0	0	0	0	0	0	0	0	0	0	0
23/03/2003 10:00:00	0	0	0	0	0	0	0	0	0	0	0	0	0
23/03/2003 11:00:00	0	0	0	0	0	0	0	0	0	0	0	0	0
23/03/2003 12:00:00	0	0	0	0	0	0	0	0	0	0	0	0	0
23/03/2003 13:00:00	0	0	0	0	0	0	0	0	0	0	0	0	0
23/03/2003 14:00:00	0	0	0	0	0	0	0	0	0	0	0	0	0
23/03/2003 15:00:00	0	0	0	0	0	0	0	0	0	0	0	0	0
23/03/2003 16:00:00	0	0	0	0	0	0	0	0	0	0	0	0	0
23/03/2003 17:00:00	0	0	0	0	0	0	0	0	0	0	0	0	0
23/03/2003 18:00:00	0	0	0	0	0	0	0	0	0	0	0	0	0
23/03/2003 19:00:00	0	0	0	0	0	0	0	0	0	0	0	0	0
23/03/2003 20:00:00	0	0	0	0	0	0	0	0	0	0	0	0	0
23/03/2003 21:00:00	0	0	0	0	0	0	0	0	0	0	0	0	0
23/03/2003 22:00:00	0	0	0	0	0	0	0	0	0	0	0	0	0
23/03/2003 23:00:00	0	0	0	0	0	0	0	0	0	0	0	0	0
24/03/2003 00:00:00	0	0	0	0	0	0	0	0	0	0	0	0	0
24/03/2003 01:00:00	0	0	0	0	0	0	0	0	0	0	0	0	0
24/03/2003 02:00:00	0	0	0	0	0	0	0	0	0	0	0	0	0
24/03/2003 03:00:00	0	0	0	0	0	0	0	0	0	0	0	0	0
24/03/2003 04:00:00	0	0	0	0	0	0	0	0	0	0	0	0	0
24/03/2003 05:00:00	0	0	0	0	0	0	0	0	0	0	0	0	0
24/03/2003 06:00:00	0	0	0	0	0	0	0	0	0	0	0	0	0
24/03/2003 07:00:00	0	0	0	0	0	0	0	0	0	0	0	0	0
24/03/2003 08:00:00	0	0	0	0	0	0	0	0	0	0	0	0	0
24/03/2003 09:00:00	0	0	0	0	0	0	0	0	0	0	0	0	0
24/03/2003 10:00:00	0	0	0	0	0	0	0	0	0	0	0	0	0
24/03/2003 11:00:00	0	0	0	0	0	0	0	0	0	0	0	0	0
24/03/2003 12:00:00	0	0	0	0	0	0	0	0	0	0	0	0	0
24/03/2003 13:00:00	0	0	0	0	0	0	0	0	0	0	0	0	0
24/03/2003 14:00:00	0	0	0	0	0	0	0	0	0	0	0	0	0
24/03/2003 15:00:00	0	0	0	0	0	0	0	0	0	0	0	0	0
24/03/2003 16:00:00	0	0	0	0	0	0	0	0	0	0	0	0	0
24/03/2003 17:00:00	0	0	0	0	0	0	0	0	0	0	0	0	0
24/03/2003 18:00:00	0	0	0	0	0	0	0	0	0	0	0	0	0
24/03/2003 19:00:00	0	0	0	0	0	0	0	0	0	0	0	0	0
24/03/2003 20:00:00	0	0	0	0	0	0	0	0	0	0	0	0	0
24/03/2003 21:00:00	0	0	0	0	0	0	0	0	0	0	0	0	0
24/03/2003 22:00:00	0	0	0	0	0	0	0	0	0	0	0	0	0
24/03/2003 23:00:00	0	0	0	0	0	0	0	0	0	0	0	0	0
25/03/2003 00:00:00	0	0	0	0	0	0	0	0	0	0	0	0	0
25/03/2003 01:00:00	0	0	0	0	0	0	0	0	0	0	0	0	0
25/03/2003 02:00:00	0	0	0	0	0	0	0	0	0	0	0	0	0
25/03/2003 03:00:00	0	0	0	0	0	0	0	0	0	0	0	0	0
25/03/2003 04:00:00	0	0	0	0	0	0	0	0	0	0	0	0	0
25/03/2003 05:00:00	0	0	0	0	0	0	0	0	0	0	0	0	0
25/03/2003 06:00:00	0	0	0	0	0	0	0	0	0	0	0	0	0
[truncated: 6,761 more rows]
