# Supplementary material for: Flood Prediction in Ungauged Basins by Physical-Based TOPKAPI Model
Source: Hindawi journal article supplement (doi:10.1155/2019/4795853), 2019-09-05
Supplement: f1 [file 4795853.f1.zip › 4795853.f1/xxdpre_2004.csv]

time	50220150	50220550	50220700	50220850	50221900	50222450	50223650	50223900	50224350	50224650	50224750	50225350	50227850
01/01/2004 00:00:00	0	0	0	0	0	0	0	0	0	0	0	0	0
01/01/2004 01:00:00	0	0	0	0	0	0	0	0	0	0	0	0	0
01/01/2004 02:00:00	0	0	0	0	0	0	0	0	0	0	0	0	0
01/01/2004 03:00:00	0	0	0	0	0	0	0	0	0	0	0	0	0
01/01/2004 04:00:00	0	0	0	0	0	0	0	0	0	0	0	0	0
01/01/2004 05:00:00	0	0	0	0	0	0	0	0	0	0	0	0	0
01/01/2004 06:00:00	0	0	0	0	0	0	0	0	0	0	0	0	0
01/01/2004 07:00:00	0	0	0	0	0	0	0	0	0	0	0	0	0
01/01/2004 08:00:00	0	0	0	0	0	0	0	0	0	0	0	0	0
01/01/2004 09:00:00	0	0	0	0	0	0	0	0	0	0	0	0	0
01/01/2004 10:00:00	0	0	0	0	0	0	0	0	0	0	0	0	0
01/01/2004 11:00:00	0	0	0	0	0	0	0	0	0	0	0	0	0
01/01/2004 12:00:00	0	0	0	0	0	0	0	0	0	0	0	0	0
01/01/2004 13:00:00	0	0	0	0	0	0	0	0	0	0	0	0	0
01/01/2004 14:00:00	0	0	0	0	0	0	0	0	0	0	0	0	0
01/01/2004 15:00:00	0	0	0	0	0	0	0	0	0	0	0	0	0
01/01/2004 16:00:00	0	0	0	0	0	0	0	0	0	0	0	0	0
01/01/2004 17:00:00	0	0	0	0	0	0	0	0	0	0	0	0	0
01/01/2004 18:00:00	0	0	0	0	0	0	0	0	0	0	0	0	0
01/01/2004 19:00:00	0	0	0	0	0	0	0	0	0	0	0	0	0
01/01/2004 20:00:00	0	0	0	0	0	0	0	0	0	0	0	0	0
01/01/2004 21:00:00	0	0	0	0	0	0	0	0	0	0	0	0	0
01/01/2004 22:00:00	0	0	0	0	0	0	0	0	0	0	0	0	0
01/01/2004 23:00:00	0	0	0	0	0	0	0	0	0	0	0	0	0
02/01/2004 00:00:00	0	0	0	0	0	0	0	0	0	0	0	0	0
02/01/2004 01:00:00	0	0	0	0	0	0	0	0	0	0	0	0	0
02/01/2004 02:00:00	0	0	0	0	0	0	0	0	0	0	0	0	0
02/01/2004 03:00:00	0	0	0	0	0	0	0	0	0	0	0	0	0
02/01/2004 04:00:00	0	0	0	0	0	0	0	0	0	0	0	0	0
02/01/2004 05:00:00	0	0	0	0	0	0	0	0	0	0	0	0	0
02/01/2004 06:00:00	0	0	0	0	0	0	0	0	0	0	0	0	0
02/01/2004 07:00:00	0	0	0	0	0	0	0	0	0	0	0	0	0
02/01/2004 08:00:00	0	0	0	0	0	0	0	0	0	0	0	0	0
02/01/2004 09:00:00	0	0	0	0	0	0	0	0	0	0	0	0	0
02/01/2004 10:00:00	0	0	0	0	0	0	0	0	0	0	0	0	0
02/01/2004 11:00:00	0	0	0	0	0	0	0	0	0	0	0	0	0
02/01/2004 12:00:00	0	0	0	0	0	0	0	0	0	0	0	0	0
02/01/2004 13:00:00	0	0	0	0	0	0	0	0	0	0	0	0	0
02/01/2004 14:00:00	0	0	0	0	0	0	0	0	0	0	0	0	0
02/01/2004 15:00:00	0	0	0	0	0	0	0	0	0	0	0	0	0
02/01/2004 16:00:00	0	0	0	0	0	0	0	0	0	0	0	0	0
02/01/2004 17:00:00	0	0	0	0	0	0	0	0	0	0	0	0	0
02/01/2004 18:00:00	0	0	0	0	0	0	0	0	0	0	0	0	0
02/01/2004 19:00:00	0	0	0	0	0	0	0	0	0	0	0	0	0
02/01/2004 20:00:00	0	0	0	0	0	0	0	0	0	0	0	0	0
02/01/2004 21:00:00	0	0	0	0	0	0	0	0	0	0	0	0	0
02/01/2004 22:00:00	0	0	0	0	0	0	0	0	0	0	0	0	0
02/01/2004 23:00:00	0	0	0	0	0	0	0	0	0	0	0	0	0
03/01/2004 00:00:00	0	0	0	0	0	0	0	0	0	0	0	0	0
03/01/2004 01:00:00	0	0	0	0	0	0	0	0	0	0	0	0	0
03/01/2004 02:00:00	0	0	0	0	0	0	0	0	0	0	0	0	0
03/01/2004 03:00:00	0	0	0	0	0	0	0	0	0	0	0	0	0
03/01/2004 04:00:00	0	0	0	0	0	0	0	0	0	0	0	0	0
03/01/2004 05:00:00	0	0	0	0	0	0	0	0	0	0	0	0	0
03/01/2004 06:00:00	0	0	0	0	0	0	0	0	0	0	0	0	0
03/01/2004 07:00:00	0	0	0	0	0	0	0	0	0	0	0	0	0
03/01/2004 08:00:00	0	0	0	0	0	0	0	0	0	0	0	0	0
03/01/2004 09:00:00	0	0	0	0	0	0	0	0	0	0	0	0	0
03/01/2004 10:00:00	0	0	0	0	0	0	0	0	0	0	0	0	0
03/01/2004 11:00:00	0	0	0	0	0	0	0	0	0	0	0	0	0
03/01/2004 12:00:00	0	0	0	0	0	0	0	0	0	0	0	0	0
03/01/2004 13:00:00	0	0	0	0	0	0	0	0	0	0	0	0	0
03/01/2004 14:00:00	0	0	0	0	0	0	0	0	0	0	0	0	0
03/01/2004 15:00:00	0	0	0	0	0	0	0	0	0	0	0	0	0
03/01/2004 16:00:00	0	0	0	0	0	0	0	0	0	0	0	0	0
03/01/2004 17:00:00	0	0	0	0	0	0	0	0	0	0	0	0	0
03/01/2004 18:00:00	0	0	0	0	0	0	0	0	0	0	0	0	0
03/01/2004 19:00:00	0	0	0	0	0	0	0	0	0	0	0	0	0
03/01/2004 20:00:00	0	0	0	0	0	0	0	0	0	0	0	0	0
03/01/2004 21:00:00	0	0	0	0	0	0	0	0	0	0	0	0	0
03/01/2004 22:00:00	0	0	0	0	0	0	0	0	0	0	0	0	0
03/01/2004 23:00:00	0	0	0	0	0	0	0	0	0	0	0	0	0
04/01/2004 00:00:00	0	0	0	0	0	0	0	0	0	0	0	0	0
04/01/2004 01:00:00	0	0	0	0	0	0	0	0	0	0	0	0	0
04/01/2004 02:00:00	0	0	0	0	0	0	0	0	0	0	0	0	0
04/01/2004 03:00:00	0	0	0	0	0	0	0	0	0	0	0	0	0
04/01/2004 04:00:00	0	0	0	0	0	0	0	0	0	0	0	0	0
04/01/2004 05:00:00	0	0	0	0	0	0	0	0	0	0	0	0	0
04/01/2004 06:00:00	0	0	0	0	0	0	0	0	0	0	0	0	0
04/01/2004 07:00:00	0	0	0	0	0	0	0	0	0	0	0	0	0
04/01/2004 08:00:00	0	0	0	0	0	0	0	0	0	0	0	0	0
04/01/2004 09:00:00	0	0	0	0	0	0	0	0	0	0	0	0	0
04/01/2004 10:00:00	0	0	0	0	0	0	0	0	0	0	0	0	0
04/01/2004 11:00:00	0	0	0	0	0	0	0	0	0	0	0	0	0
04/01/2004 12:00:00	0	0	0	0	0	0	0	0	0	0	0	0	0
04/01/2004 13:00:00	0	0	0	0	0	0	0	0	0	0	0	0	0
04/01/2004 14:00:00	0	0	0	0	0	0	0	0	0	0	0	0	0
04/01/2004 15:00:00	0	0	0	0	0	0	0	0	0	0	0	0	0
04/01/2004 16:00:00	0	0	0	0	0	0	0	0	0	0	0	0	0
04/01/2004 17:00:00	0	0	0	0	0	0	0	0	0	0	0	0	0
04/01/2004 18:00:00	0	0	0	0	0	0	0	0	0	0	0	0	0
04/01/2004 19:00:00	0	0	0	0	0	0	0	0	0	0	0	0	0
04/01/2004 20:00:00	0	0	0	0	0	0	0	0	0	0	0	0	0
04/01/2004 21:00:00	0	0	0	0	0	0	0	0	0	0	0	0	0
04/01/2004 22:00:00	0	0	0	0	0	0	0	0	0	0	0	0	0
04/01/2004 23:00:00	0	0	0	0	0	0	0	0	0	0	0	0	0
05/01/2004 00:00:00	0	0	0	0	0	0	0	0	0	0	0	0	0
05/01/2004 01:00:00	0	0	0	0	0	0	0	0	0	0	0	0	0
05/01/2004 02:00:00	0	0	0	0	0	0	0	0	0	0	0	0	0
05/01/2004 03:00:00	0	0	0	0	0	0	0	0	0	0	0	0	0
05/01/2004 04:00:00	0	0	0	0	0	0	0	0	0	0	0	0	0
05/01/2004 05:00:00	0	0	0	0	0	0	0	0	0	0	0	0	0
05/01/2004 06:00:00	0	0	0	0	0	0	0	0	0	0	0	0	0
05/01/2004 07:00:00	0	0	0	0	0	0	0	0	0	0	0	0	0
05/01/2004 08:00:00	0	0	0	0	0	0	0	0	0	0	0	0	0
05/01/2004 09:00:00	0	0	0	0	0	0	0	0	0	0	0	0	0
05/01/2004 10:00:00	0	0	0	0	0	0	0	0	0	0	0	0	0
05/01/2004 11:00:00	0	0	0	0	0	0	0	0	0	0	0	0	0
05/01/2004 12:00:00	0	0	0	0	0	0	0	0	0	0	0	0	0
05/01/2004 13:00:00	0	0	0	0	0	0	0	0	0	0	0	0	0
05/01/2004 14:00:00	0	0	0	0	0	0	0	0	0	0	0	0	0
05/01/2004 15:00:00	0	0	0	0	0	0	0	0	0	0	0	0	0
05/01/2004 16:00:00	0	0	0	0	0	0	0	0	0	0	0	0	0
05/01/2004 17:00:00	0	0	0	0	0	0	0	0	0	0	0	0	0
05/01/2004 18:00:00	0	0	0	0	0	0	0	0	0	0	0	0	0
05/01/2004 19:00:00	0	0	0	0	0	0	0	0	0	0	0	0	0
05/01/2004 20:00:00	0	0	0	0	0	0	0	0	0	0	0	0	0
05/01/2004 21:00:00	0	0	0	0	0	0	0	0	0	0	0	0	0
05/01/2004 22:00:00	0	0	0	0	0	0	0	0	0	0	0	0	0
05/01/2004 23:00:00	0	0	0	0	0	0	0	0	0	0	0	0	0
06/01/2004 00:00:00	0	0	0	0	0	0	0	0	0	0	0	0	0
06/01/2004 01:00:00	0	0	0	0	0	0	0	0	0	0	0	0	0
06/01/2004 02:00:00	0	0	0	0	0	0	0	0	0	0	0	0	0
06/01/2004 03:00:00	0	0	0	0	0	0	0	0	0	0	0	0	0
06/01/2004 04:00:00	0	0	0	0	0	0	0	0	0	0	0	0	0
06/01/2004 05:00:00	0	0	0	0	0	0	0	0	0	0	0	0	0
06/01/2004 06:00:00	0	0	0	0	0	0	0	0	0	0	0	0	0
06/01/2004 07:00:00	0	0	0	0	0	0	0	0	0	0	0	0	0
06/01/2004 08:00:00	0	0	0	0	0	0	0	0	0	0	0	0	0
06/01/2004 09:00:00	0	0	0	0	0	0	0	0	0	0	0	0	0
06/01/2004 10:00:00	0	0	0	0	0	0	0	0	0	0	0	0	0
06/01/2004 11:00:00	0	0	0	0	0	0	0	0	0	0	0	0	0
06/01/2004 12:00:00	0	0	0	0	0	0	0	0	0	0	0	0	0
06/01/2004 13:00:00	0	0	0	0	0	0	0	0	0	0	0	0	0
06/01/2004 14:00:00	0	0	0	0	0	0	0	0	0	0	0	0	0
06/01/2004 15:00:00	0	0	0	0	0	0	0	0	0	0	0	0	0
06/01/2004 16:00:00	0	0	0	0	0	0	0	0	0	0	0	0	0
06/01/2004 17:00:00	0	0	0	0	0	0	0	0	0	0	0	0	0
06/01/2004 18:00:00	0	0	0	0	0	0	0	0	0	0	0	0	0
06/01/2004 19:00:00	0	0	0	0	0	0	0	0	0	0	0	0	0
06/01/2004 20:00:00	0	0	0	0	0	0	0	0	0	0	0	0	0
06/01/2004 21:00:00	0	0	0	0	0	0	0	0	0	0	0	0	0
06/01/2004 22:00:00	0	0	0	0	0	0	0	0	0	0	0	0	0
06/01/2004 23:00:00	0	0	0	0	0	0	0	0	0	0	0	0	0
07/01/2004 00:00:00	0.166666667	0.016666667	0.2	0.091666667	0.258333333	0.333333333	0.225	0.225	0.1	0.120833333	0.191666667	0.216666667	0.129166667
07/01/2004 01:00:00	0.166666667	0.016666667	0.2	0.091666667	0.258333333	0.333333333	0.225	0.225	0.1	0.120833333	0.191666667	0.216666667	0.129166667
07/01/2004 02:00:00	0.166666667	0.016666667	0.2	0.091666667	0.258333333	0.333333333	0.225	0.225	0.1	0.120833333	0.191666667	0.216666667	0.129166667
07/01/2004 03:00:00	0.166666667	0.016666667	0.2	0.091666667	0.258333333	0.333333333	0.225	0.225	0.1	0.120833333	0.191666667	0.216666667	0.129166667
07/01/2004 04:00:00	0.166666667	0.016666667	0.2	0.091666667	0.258333333	0.333333333	0.225	0.225	0.1	0.120833333	0.191666667	0.216666667	0.129166667
07/01/2004 05:00:00	0.166666667	0.016666667	0.2	0.091666667	0.258333333	0.333333333	0.225	0.225	0.1	0.120833333	0.191666667	0.216666667	0.129166667
07/01/2004 06:00:00	0.166666667	0.016666667	0.2	0.091666667	0.258333333	0.333333333	0.225	0.225	0.1	0.120833333	0.191666667	0.216666667	0.129166667
07/01/2004 07:00:00	0.166666667	0.016666667	0.2	0.091666667	0.258333333	0.333333333	0.225	0.225	0.1	0.120833333	0.191666667	0.216666667	0.129166667
07/01/2004 08:00:00	0.166666667	0.016666667	0.2	0.091666667	0.258333333	0.333333333	0.225	0.225	0.1	0.120833333	0.191666667	0.216666667	0.129166667
07/01/2004 09:00:00	0.166666667	0.016666667	0.2	0.091666667	0.258333333	0.333333333	0.225	0.225	0.1	0.120833333	0.191666667	0.216666667	0.129166667
07/01/2004 10:00:00	0.166666667	0.016666667	0.2	0.091666667	0.258333333	0.333333333	0.225	0.225	0.1	0.120833333	0.191666667	0.216666667	0.129166667
07/01/2004 11:00:00	0.166666667	0.016666667	0.2	0.091666667	0.258333333	0.333333333	0.225	0.225	0.1	0.120833333	0.191666667	0.216666667	0.129166667
07/01/2004 12:00:00	0.166666667	0.016666667	0.2	0.091666667	0.258333333	0.333333333	0.225	0.225	0.1	0.120833333	0.191666667	0.216666667	0.129166667
07/01/2004 13:00:00	0.166666667	0.016666667	0.2	0.091666667	0.258333333	0.333333333	0.225	0.225	0.1	0.120833333	0.191666667	0.216666667	0.129166667
07/01/2004 14:00:00	0.166666667	0.016666667	0.2	0.091666667	0.258333333	0.333333333	0.225	0.225	0.1	0.120833333	0.191666667	0.216666667	0.129166667
07/01/2004 15:00:00	0.166666667	0.016666667	0.2	0.091666667	0.258333333	0.333333333	0.225	0.225	0.1	0.120833333	0.191666667	0.216666667	0.129166667
07/01/2004 16:00:00	0.166666667	0.016666667	0.2	0.091666667	0.258333333	0.333333333	0.225	0.225	0.1	0.120833333	0.191666667	0.216666667	0.129166667
07/01/2004 17:00:00	0.166666667	0.016666667	0.2	0.091666667	0.258333333	0.333333333	0.225	0.225	0.1	0.120833333	0.191666667	0.216666667	0.129166667
07/01/2004 18:00:00	0.166666667	0.016666667	0.2	0.091666667	0.258333333	0.333333333	0.225	0.225	0.1	0.120833333	0.191666667	0.216666667	0.129166667
07/01/2004 19:00:00	0.166666667	0.016666667	0.2	0.091666667	0.258333333	0.333333333	0.225	0.225	0.1	0.120833333	0.191666667	0.216666667	0.129166667
07/01/2004 20:00:00	0.166666667	0.016666667	0.2	0.091666667	0.258333333	0.333333333	0.225	0.225	0.1	0.120833333	0.191666667	0.216666667	0.129166667
07/01/2004 21:00:00	0.166666667	0.016666667	0.2	0.091666667	0.258333333	0.333333333	0.225	0.225	0.1	0.120833333	0.191666667	0.216666667	0.129166667
07/01/2004 22:00:00	0.166666667	0.016666667	0.2	0.091666667	0.258333333	0.333333333	0.225	0.225	0.1	0.120833333	0.191666667	0.216666667	0.129166667
07/01/2004 23:00:00	0.166666667	0.016666667	0.2	0.091666667	0.258333333	0.333333333	0.225	0.225	0.1	0.120833333	0.191666667	0.216666667	0.129166667
08/01/2004 00:00:00	0	0	0	0	0	0	0	0	0.008333333	0.054166667	0	0	0
08/01/2004 01:00:00	0	0	0	0	0	0	0	0	0.008333333	0.054166667	0	0	0
08/01/2004 02:00:00	0	0	0	0	0	0	0	0	0.008333333	0.054166667	0	0	0
08/01/2004 03:00:00	0	0	0	0	0	0	0	0	0.008333333	0.054166667	0	0	0
08/01/2004 04:00:00	0	0	0	0	0	0	0	0	0.008333333	0.054166667	0	0	0
08/01/2004 05:00:00	0	0	0	0	0	0	0	0	0.008333333	0.054166667	0	0	0
08/01/2004 06:00:00	0	0	0	0	0	0	0	0	0.008333333	0.054166667	0	0	0
08/01/2004 07:00:00	0	0	0	0	0	0	0	0	0.008333333	0.054166667	0	0	0
08/01/2004 08:00:00	0	0	0	0	0	0	0	0	0.008333333	0.054166667	0	0	0
08/01/2004 09:00:00	0	0	0	0	0	0	0	0	0.008333333	0.054166667	0	0	0
08/01/2004 10:00:00	0	0	0	0	0	0	0	0	0.008333333	0.054166667	0	0	0
08/01/2004 11:00:00	0	0	0	0	0	0	0	0	0.008333333	0.054166667	0	0	0
08/01/2004 12:00:00	0	0	0	0	0	0	0	0	0.008333333	0.054166667	0	0	0
08/01/2004 13:00:00	0	0	0	0	0	0	0	0	0.008333333	0.054166667	0	0	0
08/01/2004 14:00:00	0	0	0	0	0	0	0	0	0.008333333	0.054166667	0	0	0
08/01/2004 15:00:00	0	0	0	0	0	0	0	0	0.008333333	0.054166667	0	0	0
08/01/2004 16:00:00	0	0	0	0	0	0	0	0	0.008333333	0.054166667	0	0	0
08/01/2004 17:00:00	0	0	0	0	0	0	0	0	0.008333333	0.054166667	0	0	0
08/01/2004 18:00:00	0	0	0	0	0	0	0	0	0.008333333	0.054166667	0	0	0
08/01/2004 19:00:00	0	0	0	0	0	0	0	0	0.008333333	0.054166667	0	0	0
08/01/2004 20:00:00	0	0	0	0	0	0	0	0	0.008333333	0.054166667	0	0	0
08/01/2004 21:00:00	0	0	0	0	0	0	0	0	0.008333333	0.054166667	0	0	0
08/01/2004 22:00:00	0	0	0	0	0	0	0	0	0.008333333	0.054166667	0	0	0
08/01/2004 23:00:00	0	0	0	0	0	0	0	0	0.008333333	0.054166667	0	0	0
09/01/2004 00:00:00	0.154166667	0.108333333	0.304166667	0.125	0.191666667	0.145833333	0.291666667	0.395833333	0.433333333	0.366666667	0.416666667	0.266666667	0.4625
09/01/2004 01:00:00	0.154166667	0.108333333	0.304166667	0.125	0.191666667	0.145833333	0.291666667	0.395833333	0.433333333	0.366666667	0.416666667	0.266666667	0.4625
09/01/2004 02:00:00	0.154166667	0.108333333	0.304166667	0.125	0.191666667	0.145833333	0.291666667	0.395833333	0.433333333	0.366666667	0.416666667	0.266666667	0.4625
09/01/2004 03:00:00	0.154166667	0.108333333	0.304166667	0.125	0.191666667	0.145833333	0.291666667	0.395833333	0.433333333	0.366666667	0.416666667	0.266666667	0.4625
09/01/2004 04:00:00	0.154166667	0.108333333	0.304166667	0.125	0.191666667	0.145833333	0.291666667	0.395833333	0.433333333	0.366666667	0.416666667	0.266666667	0.4625
09/01/2004 05:00:00	0.154166667	0.108333333	0.304166667	0.125	0.191666667	0.145833333	0.291666667	0.395833333	0.433333333	0.366666667	0.416666667	0.266666667	0.4625
09/01/2004 06:00:00	0.154166667	0.108333333	0.304166667	0.125	0.191666667	0.145833333	0.291666667	0.395833333	0.433333333	0.366666667	0.416666667	0.266666667	0.4625
09/01/2004 07:00:00	0.154166667	0.108333333	0.304166667	0.125	0.191666667	0.145833333	0.291666667	0.395833333	0.433333333	0.366666667	0.416666667	0.266666667	0.4625
09/01/2004 08:00:00	0.154166667	0.108333333	0.304166667	0.125	0.191666667	0.145833333	0.291666667	0.395833333	0.433333333	0.366666667	0.416666667	0.266666667	0.4625
09/01/2004 09:00:00	0.154166667	0.108333333	0.304166667	0.125	0.191666667	0.145833333	0.291666667	0.395833333	0.433333333	0.366666667	0.416666667	0.266666667	0.4625
09/01/2004 10:00:00	0.154166667	0.108333333	0.304166667	0.125	0.191666667	0.145833333	0.291666667	0.395833333	0.433333333	0.366666667	0.416666667	0.266666667	0.4625
09/01/2004 11:00:00	0.154166667	0.108333333	0.304166667	0.125	0.191666667	0.145833333	0.291666667	0.395833333	0.433333333	0.366666667	0.416666667	0.266666667	0.4625
09/01/2004 12:00:00	0.154166667	0.108333333	0.304166667	0.125	0.191666667	0.145833333	0.291666667	0.395833333	0.433333333	0.366666667	0.416666667	0.266666667	0.4625
09/01/2004 13:00:00	0.154166667	0.108333333	0.304166667	0.125	0.191666667	0.145833333	0.291666667	0.395833333	0.433333333	0.366666667	0.416666667	0.266666667	0.4625
09/01/2004 14:00:00	0.154166667	0.108333333	0.304166667	0.125	0.191666667	0.145833333	0.291666667	0.395833333	0.433333333	0.366666667	0.416666667	0.266666667	0.4625
09/01/2004 15:00:00	0.154166667	0.108333333	0.304166667	0.125	0.191666667	0.145833333	0.291666667	0.395833333	0.433333333	0.366666667	0.416666667	0.266666667	0.4625
09/01/2004 16:00:00	0.154166667	0.108333333	0.304166667	0.125	0.191666667	0.145833333	0.291666667	0.395833333	0.433333333	0.366666667	0.416666667	0.266666667	0.4625
09/01/2004 17:00:00	0.154166667	0.108333333	0.304166667	0.125	0.191666667	0.145833333	0.291666667	0.395833333	0.433333333	0.366666667	0.416666667	0.266666667	0.4625
09/01/2004 18:00:00	0.154166667	0.108333333	0.304166667	0.125	0.191666667	0.145833333	0.291666667	0.395833333	0.433333333	0.366666667	0.416666667	0.266666667	0.4625
09/01/2004 19:00:00	0.154166667	0.108333333	0.304166667	0.125	0.191666667	0.145833333	0.291666667	0.395833333	0.433333333	0.366666667	0.416666667	0.266666667	0.4625
09/01/2004 20:00:00	0.154166667	0.108333333	0.304166667	0.125	0.191666667	0.145833333	0.291666667	0.395833333	0.433333333	0.366666667	0.416666667	0.266666667	0.4625
09/01/2004 21:00:00	0.154166667	0.108333333	0.304166667	0.125	0.191666667	0.145833333	0.291666667	0.395833333	0.433333333	0.366666667	0.416666667	0.266666667	0.4625
09/01/2004 22:00:00	0.154166667	0.108333333	0.304166667	0.125	0.191666667	0.145833333	0.291666667	0.395833333	0.433333333	0.366666667	0.416666667	0.266666667	0.4625
09/01/2004 23:00:00	0.154166667	0.108333333	0.304166667	0.125	0.191666667	0.145833333	0.291666667	0.395833333	0.433333333	0.366666667	0.416666667	0.266666667	0.4625
10/01/2004 00:00:00	0.479166667	0.220833333	0.6125	0.366666667	0.6625	0.583333333	0.8	1.020833333	0.954166667	1.070833333	1.1375	1.058333333	0.641666667
10/01/2004 01:00:00	0.479166667	0.220833333	0.6125	0.366666667	0.6625	0.583333333	0.8	1.020833333	0.954166667	1.070833333	1.1375	1.058333333	0.641666667
10/01/2004 02:00:00	0.479166667	0.220833333	0.6125	0.366666667	0.6625	0.583333333	0.8	1.020833333	0.954166667	1.070833333	1.1375	1.058333333	0.641666667
10/01/2004 03:00:00	0.479166667	0.220833333	0.6125	0.366666667	0.6625	0.583333333	0.8	1.020833333	0.954166667	1.070833333	1.1375	1.058333333	0.641666667
10/01/2004 04:00:00	0.479166667	0.220833333	0.6125	0.366666667	0.6625	0.583333333	0.8	1.020833333	0.954166667	1.070833333	1.1375	1.058333333	0.641666667
10/01/2004 05:00:00	0.479166667	0.220833333	0.6125	0.366666667	0.6625	0.583333333	0.8	1.020833333	0.954166667	1.070833333	1.1375	1.058333333	0.641666667
10/01/2004 06:00:00	0.479166667	0.220833333	0.6125	0.366666667	0.6625	0.583333333	0.8	1.020833333	0.954166667	1.070833333	1.1375	1.058333333	0.641666667
10/01/2004 07:00:00	0.479166667	0.220833333	0.6125	0.366666667	0.6625	0.583333333	0.8	1.020833333	0.954166667	1.070833333	1.1375	1.058333333	0.641666667
10/01/2004 08:00:00	0.479166667	0.220833333	0.6125	0.366666667	0.6625	0.583333333	0.8	1.020833333	0.954166667	1.070833333	1.1375	1.058333333	0.641666667
10/01/2004 09:00:00	0.479166667	0.220833333	0.6125	0.366666667	0.6625	0.583333333	0.8	1.020833333	0.954166667	1.070833333	1.1375	1.058333333	0.641666667
10/01/2004 10:00:00	0.479166667	0.220833333	0.6125	0.366666667	0.6625	0.583333333	0.8	1.020833333	0.954166667	1.070833333	1.1375	1.058333333	0.641666667
10/01/2004 11:00:00	0.479166667	0.220833333	0.6125	0.366666667	0.6625	0.583333333	0.8	1.020833333	0.954166667	1.070833333	1.1375	1.058333333	0.641666667
10/01/2004 12:00:00	0.479166667	0.220833333	0.6125	0.366666667	0.6625	0.583333333	0.8	1.020833333	0.954166667	1.070833333	1.1375	1.058333333	0.641666667
10/01/2004 13:00:00	0.479166667	0.220833333	0.6125	0.366666667	0.6625	0.583333333	0.8	1.020833333	0.954166667	1.070833333	1.1375	1.058333333	0.641666667
10/01/2004 14:00:00	0.479166667	0.220833333	0.6125	0.366666667	0.6625	0.583333333	0.8	1.020833333	0.954166667	1.070833333	1.1375	1.058333333	0.641666667
10/01/2004 15:00:00	0.479166667	0.220833333	0.6125	0.366666667	0.6625	0.583333333	0.8	1.020833333	0.954166667	1.070833333	1.1375	1.058333333	0.641666667
10/01/2004 16:00:00	0.479166667	0.220833333	0.6125	0.366666667	0.6625	0.583333333	0.8	1.020833333	0.954166667	1.070833333	1.1375	1.058333333	0.641666667
10/01/2004 17:00:00	0.479166667	0.220833333	0.6125	0.366666667	0.6625	0.583333333	0.8	1.020833333	0.954166667	1.070833333	1.1375	1.058333333	0.641666667
10/01/2004 18:00:00	0.479166667	0.220833333	0.6125	0.366666667	0.6625	0.583333333	0.8	1.020833333	0.954166667	1.070833333	1.1375	1.058333333	0.641666667
10/01/2004 19:00:00	0.479166667	0.220833333	0.6125	0.366666667	0.6625	0.583333333	0.8	1.020833333	0.954166667	1.070833333	1.1375	1.058333333	0.641666667
10/01/2004 20:00:00	0.479166667	0.220833333	0.6125	0.366666667	0.6625	0.583333333	0.8	1.020833333	0.954166667	1.070833333	1.1375	1.058333333	0.641666667
10/01/2004 21:00:00	0.479166667	0.220833333	0.6125	0.366666667	0.6625	0.583333333	0.8	1.020833333	0.954166667	1.070833333	1.1375	1.058333333	0.641666667
10/01/2004 22:00:00	0.479166667	0.220833333	0.6125	0.366666667	0.6625	0.583333333	0.8	1.020833333	0.954166667	1.070833333	1.1375	1.058333333	0.641666667
10/01/2004 23:00:00	0.479166667	0.220833333	0.6125	0.366666667	0.6625	0.583333333	0.8	1.020833333	0.954166667	1.070833333	1.1375	1.058333333	0.641666667
11/01/2004 00:00:00	0	0	0	0	0	0	0	0	0	0	0	0	0
11/01/2004 01:00:00	0	0	0	0	0	0	0	0	0	0	0	0	0
11/01/2004 02:00:00	0	0	0	0	0	0	0	0	0	0	0	0	0
11/01/2004 03:00:00	0	0	0	0	0	0	0	0	0	0	0	0	0
11/01/2004 04:00:00	0	0	0	0	0	0	0	0	0	0	0	0	0
11/01/2004 05:00:00	0	0	0	0	0	0	0	0	0	0	0	0	0
11/01/2004 06:00:00	0	0	0	0	0	0	0	0	0	0	0	0	0
11/01/2004 07:00:00	0	0	0	0	0	0	0	0	0	0	0	0	0
11/01/2004 08:00:00	0	0	0	0	0	0	0	0	0	0	0	0	0
11/01/2004 09:00:00	0	0	0	0	0	0	0	0	0	0	0	0	0
11/01/2004 10:00:00	0	0	0	0	0	0	0	0	0	0	0	0	0
11/01/2004 11:00:00	0	0	0	0	0	0	0	0	0	0	0	0	0
11/01/2004 12:00:00	0	0	0	0	0	0	0	0	0	0	0	0	0
11/01/2004 13:00:00	0	0	0	0	0	0	0	0	0	0	0	0	0
11/01/2004 14:00:00	0	0	0	0	0	0	0	0	0	0	0	0	0
11/01/2004 15:00:00	0	0	0	0	0	0	0	0	0	0	0	0	0
11/01/2004 16:00:00	0	0	0	0	0	0	0	0	0	0	0	0	0
11/01/2004 17:00:00	0	0	0	0	0	0	0	0	0	0	0	0	0
11/01/2004 18:00:00	0	0	0	0	0	0	0	0	0	0	0	0	0
11/01/2004 19:00:00	0	0	0	0	0	0	0	0	0	0	0	0	0
11/01/2004 20:00:00	0	0	0	0	0	0	0	0	0	0	0	0	0
11/01/2004 21:00:00	0	0	0	0	0	0	0	0	0	0	0	0	0
11/01/2004 22:00:00	0	0	0	0	0	0	0	0	0	0	0	0	0
11/01/2004 23:00:00	0	0	0	0	0	0	0	0	0	0	0	0	0
12/01/2004 00:00:00	0	0	0	0	0	0	0	0	0	0	0	0	0
12/01/2004 01:00:00	0	0	0	0	0	0	0	0	0	0	0	0	0
12/01/2004 02:00:00	0	0	0	0	0	0	0	0	0	0	0	0	0
12/01/2004 03:00:00	0	0	0	0	0	0	0	0	0	0	0	0	0
12/01/2004 04:00:00	0	0	0	0	0	0	0	0	0	0	0	0	0
12/01/2004 05:00:00	0	0	0	0	0	0	0	0	0	0	0	0	0
12/01/2004 06:00:00	0	0	0	0	0	0	0	0	0	0	0	0	0
12/01/2004 07:00:00	0	0	0	0	0	0	0	0	0	0	0	0	0
12/01/2004 08:00:00	0	0	0	0	0	0	0	0	0	0	0	0	0
12/01/2004 09:00:00	0	0	0	0	0	0	0	0	0	0	0	0	0
12/01/2004 10:00:00	0	0	0	0	0	0	0	0	0	0	0	0	0
12/01/2004 11:00:00	0	0	0	0	0	0	0	0	0	0	0	0	0
12/01/2004 12:00:00	0	0	0	0	0	0	0	0	0	0	0	0	0
12/01/2004 13:00:00	0	0	0	0	0	0	0	0	0	0	0	0	0
12/01/2004 14:00:00	0	0	0	0	0	0	0	0	0	0	0	0	0
12/01/2004 15:00:00	0	0	0	0	0	0	0	0	0	0	0	0	0
12/01/2004 16:00:00	0	0	0	0	0	0	0	0	0	0	0	0	0
12/01/2004 17:00:00	0	0	0	0	0	0	0	0	0	0	0	0	0
12/01/2004 18:00:00	0	0	0	0	0	0	0	0	0	0	0	0	0
12/01/2004 19:00:00	0	0	0	0	0	0	0	0	0	0	0	0	0
12/01/2004 20:00:00	0	0	0	0	0	0	0	0	0	0	0	0	0
12/01/2004 21:00:00	0	0	0	0	0	0	0	0	0	0	0	0	0
12/01/2004 22:00:00	0	0	0	0	0	0	0	0	0	0	0	0	0
12/01/2004 23:00:00	0	0	0	0	0	0	0	0	0	0	0	0	0
13/01/2004 00:00:00	0	0	0	0.020833333	0.016666667	0	0	0	0	0	0	0	0
13/01/2004 01:00:00	0	0	0	0.020833333	0.016666667	0	0	0	0	0	0	0	0
13/01/2004 02:00:00	0	0	0	0.020833333	0.016666667	0	0	0	0	0	0	0	0
13/01/2004 03:00:00	0	0	0	0.020833333	0.016666667	0	0	0	0	0	0	0	0
13/01/2004 04:00:00	0	0	0	0.020833333	0.016666667	0	0	0	0	0	0	0	0
13/01/2004 05:00:00	0	0	0	0.020833333	0.016666667	0	0	0	0	0	0	0	0
13/01/2004 06:00:00	0	0	0	0.020833333	0.016666667	0	0	0	0	0	0	0	0
13/01/2004 07:00:00	0	0	0	0.020833333	0.016666667	0	0	0	0	0	0	0	0
13/01/2004 08:00:00	0	0	0	0.020833333	0.016666667	0	0	0	0	0	0	0	0
13/01/2004 09:00:00	0	0	0	0.020833333	0.016666667	0	0	0	0	0	0	0	0
13/01/2004 10:00:00	0	0	0	0.020833333	0.016666667	0	0	0	0	0	0	0	0
13/01/2004 11:00:00	0	0	0	0.020833333	0.016666667	0	0	0	0	0	0	0	0
13/01/2004 12:00:00	0	0	0	0.020833333	0.016666667	0	0	0	0	0	0	0	0
13/01/2004 13:00:00	0	0	0	0.020833333	0.016666667	0	0	0	0	0	0	0	0
13/01/2004 14:00:00	0	0	0	0.020833333	0.016666667	0	0	0	0	0	0	0	0
13/01/2004 15:00:00	0	0	0	0.020833333	0.016666667	0	0	0	0	0	0	0	0
13/01/2004 16:00:00	0	0	0	0.020833333	0.016666667	0	0	0	0	0	0	0	0
13/01/2004 17:00:00	0	0	0	0.020833333	0.016666667	0	0	0	0	0	0	0	0
13/01/2004 18:00:00	0	0	0	0.020833333	0.016666667	0	0	0	0	0	0	0	0
13/01/2004 19:00:00	0	0	0	0.020833333	0.016666667	0	0	0	0	0	0	0	0
13/01/2004 20:00:00	0	0	0	0.020833333	0.016666667	0	0	0	0	0	0	0	0
13/01/2004 21:00:00	0	0	0	0.020833333	0.016666667	0	0	0	0	0	0	0	0
13/01/2004 22:00:00	0	0	0	0.020833333	0.016666667	0	0	0	0	0	0	0	0
13/01/2004 23:00:00	0	0	0	0.020833333	0.016666667	0	0	0	0	0	0	0	0
14/01/2004 00:00:00	0.045833333	0.029166667	0.033333333	0.025	0.004166667	0	0.0125	0	0	0	0	0	0
14/01/2004 01:00:00	0.045833333	0.029166667	0.033333333	0.025	0.004166667	0	0.0125	0	0	0	0	0	0
14/01/2004 02:00:00	0.045833333	0.029166667	0.033333333	0.025	0.004166667	0	0.0125	0	0	0	0	0	0
14/01/2004 03:00:00	0.045833333	0.029166667	0.033333333	0.025	0.004166667	0	0.0125	0	0	0	0	0	0
14/01/2004 04:00:00	0.045833333	0.029166667	0.033333333	0.025	0.004166667	0	0.0125	0	0	0	0	0	0
14/01/2004 05:00:00	0.045833333	0.029166667	0.033333333	0.025	0.004166667	0	0.0125	0	0	0	0	0	0
14/01/2004 06:00:00	0.045833333	0.029166667	0.033333333	0.025	0.004166667	0	0.0125	0	0	0	0	0	0
14/01/2004 07:00:00	0.045833333	0.029166667	0.033333333	0.025	0.004166667	0	0.0125	0	0	0	0	0	0
14/01/2004 08:00:00	0.045833333	0.029166667	0.033333333	0.025	0.004166667	0	0.0125	0	0	0	0	0	0
14/01/2004 09:00:00	0.045833333	0.029166667	0.033333333	0.025	0.004166667	0	0.0125	0	0	0	0	0	0
14/01/2004 10:00:00	0.045833333	0.029166667	0.033333333	0.025	0.004166667	0	0.0125	0	0	0	0	0	0
14/01/2004 11:00:00	0.045833333	0.029166667	0.033333333	0.025	0.004166667	0	0.0125	0	0	0	0	0	0
14/01/2004 12:00:00	0.045833333	0.029166667	0.033333333	0.025	0.004166667	0	0.0125	0	0	0	0	0	0
14/01/2004 13:00:00	0.045833333	0.029166667	0.033333333	0.025	0.004166667	0	0.0125	0	0	0	0	0	0
14/01/2004 14:00:00	0.045833333	0.029166667	0.033333333	0.025	0.004166667	0	0.0125	0	0	0	0	0	0
14/01/2004 15:00:00	0.045833333	0.029166667	0.033333333	0.025	0.004166667	0	0.0125	0	0	0	0	0	0
14/01/2004 16:00:00	0.045833333	0.029166667	0.033333333	0.025	0.004166667	0	0.0125	0	0	0	0	0	0
14/01/2004 17:00:00	0.045833333	0.029166667	0.033333333	0.025	0.004166667	0	0.0125	0	0	0	0	0	0
14/01/2004 18:00:00	0.045833333	0.029166667	0.033333333	0.025	0.004166667	0	0.0125	0	0	0	0	0	0
14/01/2004 19:00:00	0.045833333	0.029166667	0.033333333	0.025	0.004166667	0	0.0125	0	0	0	0	0	0
14/01/2004 20:00:00	0.045833333	0.029166667	0.033333333	0.025	0.004166667	0	0.0125	0	0	0	0	0	0
14/01/2004 21:00:00	0.045833333	0.029166667	0.033333333	0.025	0.004166667	0	0.0125	0	0	0	0	0	0
14/01/2004 22:00:00	0.045833333	0.029166667	0.033333333	0.025	0.004166667	0	0.0125	0	0	0	0	0	0
14/01/2004 23:00:00	0.045833333	0.029166667	0.033333333	0.025	0.004166667	0	0.0125	0	0	0	0	0	0
15/01/2004 00:00:00	0.254166667	0.1125	0.2875	0.179166667	0.195833333	0.125	0.258333333	0.241666667	0.204166667	0.154166667	0.158333333	0.154166667	0.3375
15/01/2004 01:00:00	0.254166667	0.1125	0.2875	0.179166667	0.195833333	0.125	0.258333333	0.241666667	0.204166667	0.154166667	0.158333333	0.154166667	0.3375
15/01/2004 02:00:00	0.254166667	0.1125	0.2875	0.179166667	0.195833333	0.125	0.258333333	0.241666667	0.204166667	0.154166667	0.158333333	0.154166667	0.3375
15/01/2004 03:00:00	0.254166667	0.1125	0.2875	0.179166667	0.195833333	0.125	0.258333333	0.241666667	0.204166667	0.154166667	0.158333333	0.154166667	0.3375
15/01/2004 04:00:00	0.254166667	0.1125	0.2875	0.179166667	0.195833333	0.125	0.258333333	0.241666667	0.204166667	0.154166667	0.158333333	0.154166667	0.3375
15/01/2004 05:00:00	0.254166667	0.1125	0.2875	0.179166667	0.195833333	0.125	0.258333333	0.241666667	0.204166667	0.154166667	0.158333333	0.154166667	0.3375
15/01/2004 06:00:00	0.254166667	0.1125	0.2875	0.179166667	0.195833333	0.125	0.258333333	0.241666667	0.204166667	0.154166667	0.158333333	0.154166667	0.3375
15/01/2004 07:00:00	0.254166667	0.1125	0.2875	0.179166667	0.195833333	0.125	0.258333333	0.241666667	0.204166667	0.154166667	0.158333333	0.154166667	0.3375
15/01/2004 08:00:00	0.254166667	0.1125	0.2875	0.179166667	0.195833333	0.125	0.258333333	0.241666667	0.204166667	0.154166667	0.158333333	0.154166667	0.3375
15/01/2004 09:00:00	0.254166667	0.1125	0.2875	0.179166667	0.195833333	0.125	0.258333333	0.241666667	0.204166667	0.154166667	0.158333333	0.154166667	0.3375
15/01/2004 10:00:00	0.254166667	0.1125	0.2875	0.179166667	0.195833333	0.125	0.258333333	0.241666667	0.204166667	0.154166667	0.158333333	0.154166667	0.3375
15/01/2004 11:00:00	0.254166667	0.1125	0.2875	0.179166667	0.195833333	0.125	0.258333333	0.241666667	0.204166667	0.154166667	0.158333333	0.154166667	0.3375
15/01/2004 12:00:00	0.254166667	0.1125	0.2875	0.179166667	0.195833333	0.125	0.258333333	0.241666667	0.204166667	0.154166667	0.158333333	0.154166667	0.3375
15/01/2004 13:00:00	0.254166667	0.1125	0.2875	0.179166667	0.195833333	0.125	0.258333333	0.241666667	0.204166667	0.154166667	0.158333333	0.154166667	0.3375
15/01/2004 14:00:00	0.254166667	0.1125	0.2875	0.179166667	0.195833333	0.125	0.258333333	0.241666667	0.204166667	0.154166667	0.158333333	0.154166667	0.3375
15/01/2004 15:00:00	0.254166667	0.1125	0.2875	0.179166667	0.195833333	0.125	0.258333333	0.241666667	0.204166667	0.154166667	0.158333333	0.154166667	0.3375
15/01/2004 16:00:00	0.254166667	0.1125	0.2875	0.179166667	0.195833333	0.125	0.258333333	0.241666667	0.204166667	0.154166667	0.158333333	0.154166667	0.3375
15/01/2004 17:00:00	0.254166667	0.1125	0.2875	0.179166667	0.195833333	0.125	0.258333333	0.241666667	0.204166667	0.154166667	0.158333333	0.154166667	0.3375
15/01/2004 18:00:00	0.254166667	0.1125	0.2875	0.179166667	0.195833333	0.125	0.258333333	0.241666667	0.204166667	0.154166667	0.158333333	0.154166667	0.3375
15/01/2004 19:00:00	0.254166667	0.1125	0.2875	0.179166667	0.195833333	0.125	0.258333333	0.241666667	0.204166667	0.154166667	0.158333333	0.154166667	0.3375
15/01/2004 20:00:00	0.254166667	0.1125	0.2875	0.179166667	0.195833333	0.125	0.258333333	0.241666667	0.204166667	0.154166667	0.158333333	0.154166667	0.3375
15/01/2004 21:00:00	0.254166667	0.1125	0.2875	0.179166667	0.195833333	0.125	0.258333333	0.241666667	0.204166667	0.154166667	0.158333333	0.154166667	0.3375
15/01/2004 22:00:00	0.254166667	0.1125	0.2875	0.179166667	0.195833333	0.125	0.258333333	0.241666667	0.204166667	0.154166667	0.158333333	0.154166667	0.3375
15/01/2004 23:00:00	0.254166667	0.1125	0.2875	0.179166667	0.195833333	0.125	0.258333333	0.241666667	0.204166667	0.154166667	0.158333333	0.154166667	0.3375
16/01/2004 00:00:00	0	0	0.0125	0.008333333	0.008333333	0.145833333	0.033333333	0.004166667	0.016666667	0.0125	0.020833333	0.0125	0.008333333
16/01/2004 01:00:00	0	0	0.0125	0.008333333	0.008333333	0.145833333	0.033333333	0.004166667	0.016666667	0.0125	0.020833333	0.0125	0.008333333
16/01/2004 02:00:00	0	0	0.0125	0.008333333	0.008333333	0.145833333	0.033333333	0.004166667	0.016666667	0.0125	0.020833333	0.0125	0.008333333
16/01/2004 03:00:00	0	0	0.0125	0.008333333	0.008333333	0.145833333	0.033333333	0.004166667	0.016666667	0.0125	0.020833333	0.0125	0.008333333
16/01/2004 04:00:00	0	0	0.0125	0.008333333	0.008333333	0.145833333	0.033333333	0.004166667	0.016666667	0.0125	0.020833333	0.0125	0.008333333
16/01/2004 05:00:00	0	0	0.0125	0.008333333	0.008333333	0.145833333	0.033333333	0.004166667	0.016666667	0.0125	0.020833333	0.0125	0.008333333
16/01/2004 06:00:00	0	0	0.0125	0.008333333	0.008333333	0.145833333	0.033333333	0.004166667	0.016666667	0.0125	0.020833333	0.0125	0.008333333
16/01/2004 07:00:00	0	0	0.0125	0.008333333	0.008333333	0.145833333	0.033333333	0.004166667	0.016666667	0.0125	0.020833333	0.0125	0.008333333
16/01/2004 08:00:00	0	0	0.0125	0.008333333	0.008333333	0.145833333	0.033333333	0.004166667	0.016666667	0.0125	0.020833333	0.0125	0.008333333
16/01/2004 09:00:00	0	0	0.0125	0.008333333	0.008333333	0.145833333	0.033333333	0.004166667	0.016666667	0.0125	0.020833333	0.0125	0.008333333
16/01/2004 10:00:00	0	0	0.0125	0.008333333	0.008333333	0.145833333	0.033333333	0.004166667	0.016666667	0.0125	0.020833333	0.0125	0.008333333
16/01/2004 11:00:00	0	0	0.0125	0.008333333	0.008333333	0.145833333	0.033333333	0.004166667	0.016666667	0.0125	0.020833333	0.0125	0.008333333
16/01/2004 12:00:00	0	0	0.0125	0.008333333	0.008333333	0.145833333	0.033333333	0.004166667	0.016666667	0.0125	0.020833333	0.0125	0.008333333
16/01/2004 13:00:00	0	0	0.0125	0.008333333	0.008333333	0.145833333	0.033333333	0.004166667	0.016666667	0.0125	0.020833333	0.0125	0.008333333
16/01/2004 14:00:00	0	0	0.0125	0.008333333	0.008333333	0.145833333	0.033333333	0.004166667	0.016666667	0.0125	0.020833333	0.0125	0.008333333
16/01/2004 15:00:00	0	0	0.0125	0.008333333	0.008333333	0.145833333	0.033333333	0.004166667	0.016666667	0.0125	0.020833333	0.0125	0.008333333
16/01/2004 16:00:00	0	0	0.0125	0.008333333	0.008333333	0.145833333	0.033333333	0.004166667	0.016666667	0.0125	0.020833333	0.0125	0.008333333
16/01/2004 17:00:00	0	0	0.0125	0.008333333	0.008333333	0.145833333	0.033333333	0.004166667	0.016666667	0.0125	0.020833333	0.0125	0.008333333
16/01/2004 18:00:00	0	0	0.0125	0.008333333	0.008333333	0.145833333	0.033333333	0.004166667	0.016666667	0.0125	0.020833333	0.0125	0.008333333
16/01/2004 19:00:00	0	0	0.0125	0.008333333	0.008333333	0.145833333	0.033333333	0.004166667	0.016666667	0.0125	0.020833333	0.0125	0.008333333
16/01/2004 20:00:00	0	0	0.0125	0.008333333	0.008333333	0.145833333	0.033333333	0.004166667	0.016666667	0.0125	0.020833333	0.0125	0.008333333
16/01/2004 21:00:00	0	0	0.0125	0.008333333	0.008333333	0.145833333	0.033333333	0.004166667	0.016666667	0.0125	0.020833333	0.0125	0.008333333
16/01/2004 22:00:00	0	0	0.0125	0.008333333	0.008333333	0.145833333	0.033333333	0.004166667	0.016666667	0.0125	0.020833333	0.0125	0.008333333
16/01/2004 23:00:00	0	0	0.0125	0.008333333	0.008333333	0.145833333	0.033333333	0.004166667	0.016666667	0.0125	0.020833333	0.0125	0.008333333
17/01/2004 00:00:00	0	0	0	0	0.0125	0	0.05	0.020833333	0.020833333	0.025	0	0.016666667	0.016666667
17/01/2004 01:00:00	0	0	0	0	0.0125	0	0.05	0.020833333	0.020833333	0.025	0	0.016666667	0.016666667
17/01/2004 02:00:00	0	0	0	0	0.0125	0	0.05	0.020833333	0.020833333	0.025	0	0.016666667	0.016666667
17/01/2004 03:00:00	0	0	0	0	0.0125	0	0.05	0.020833333	0.020833333	0.025	0	0.016666667	0.016666667
17/01/2004 04:00:00	0	0	0	0	0.0125	0	0.05	0.020833333	0.020833333	0.025	0	0.016666667	0.016666667
17/01/2004 05:00:00	0	0	0	0	0.0125	0	0.05	0.020833333	0.020833333	0.025	0	0.016666667	0.016666667
17/01/2004 06:00:00	0	0	0	0	0.0125	0	0.05	0.020833333	0.020833333	0.025	0	0.016666667	0.016666667
17/01/2004 07:00:00	0	0	0	0	0.0125	0	0.05	0.020833333	0.020833333	0.025	0	0.016666667	0.016666667
17/01/2004 08:00:00	0	0	0	0	0.0125	0	0.05	0.020833333	0.020833333	0.025	0	0.016666667	0.016666667
17/01/2004 09:00:00	0	0	0	0	0.0125	0	0.05	0.020833333	0.020833333	0.025	0	0.016666667	0.016666667
17/01/2004 10:00:00	0	0	0	0	0.0125	0	0.05	0.020833333	0.020833333	0.025	0	0.016666667	0.016666667
17/01/2004 11:00:00	0	0	0	0	0.0125	0	0.05	0.020833333	0.020833333	0.025	0	0.016666667	0.016666667
17/01/2004 12:00:00	0	0	0	0	0.0125	0	0.05	0.020833333	0.020833333	0.025	0	0.016666667	0.016666667
17/01/2004 13:00:00	0	0	0	0	0.0125	0	0.05	0.020833333	0.020833333	0.025	0	0.016666667	0.016666667
17/01/2004 14:00:00	0	0	0	0	0.0125	0	0.05	0.020833333	0.020833333	0.025	0	0.016666667	0.016666667
17/01/2004 15:00:00	0	0	0	0	0.0125	0	0.05	0.020833333	0.020833333	0.025	0	0.016666667	0.016666667
17/01/2004 16:00:00	0	0	0	0	0.0125	0	0.05	0.020833333	0.020833333	0.025	0	0.016666667	0.016666667
17/01/2004 17:00:00	0	0	0	0	0.0125	0	0.05	0.020833333	0.020833333	0.025	0	0.016666667	0.016666667
17/01/2004 18:00:00	0	0	0	0	0.0125	0	0.05	0.020833333	0.020833333	0.025	0	0.016666667	0.016666667
17/01/2004 19:00:00	0	0	0	0	0.0125	0	0.05	0.020833333	0.020833333	0.025	0	0.016666667	0.016666667
17/01/2004 20:00:00	0	0	0	0	0.0125	0	0.05	0.020833333	0.020833333	0.025	0	0.016666667	0.016666667
17/01/2004 21:00:00	0	0	0	0	0.0125	0	0.05	0.020833333	0.020833333	0.025	0	0.016666667	0.016666667
17/01/2004 22:00:00	0	0	0	0	0.0125	0	0.05	0.020833333	0.020833333	0.025	0	0.016666667	0.016666667
17/01/2004 23:00:00	0	0	0	0	0.0125	0	0.05	0.020833333	0.020833333	0.025	0	0.016666667	0.016666667
18/01/2004 00:00:00	0	0	0	0	0	0	0	0	0	0	0	0	0
18/01/2004 01:00:00	0	0	0	0	0	0	0	0	0	0	0	0	0
18/01/2004 02:00:00	0	0	0	0	0	0	0	0	0	0	0	0	0
18/01/2004 03:00:00	0	0	0	0	0	0	0	0	0	0	0	0	0
18/01/2004 04:00:00	0	0	0	0	0	0	0	0	0	0	0	0	0
18/01/2004 05:00:00	0	0	0	0	0	0	0	0	0	0	0	0	0
18/01/2004 06:00:00	0	0	0	0	0	0	0	0	0	0	0	0	0
18/01/2004 07:00:00	0	0	0	0	0	0	0	0	0	0	0	0	0
18/01/2004 08:00:00	0	0	0	0	0	0	0	0	0	0	0	0	0
18/01/2004 09:00:00	0	0	0	0	0	0	0	0	0	0	0	0	0
18/01/2004 10:00:00	0	0	0	0	0	0	0	0	0	0	0	0	0
18/01/2004 11:00:00	0	0	0	0	0	0	0	0	0	0	0	0	0
18/01/2004 12:00:00	0	0	0	0	0	0	0	0	0	0	0	0	0
18/01/2004 13:00:00	0	0	0	0	0	0	0	0	0	0	0	0	0
18/01/2004 14:00:00	0	0	0	0	0	0	0	0	0	0	0	0	0
18/01/2004 15:00:00	0	0	0	0	0	0	0	0	0	0	0	0	0
18/01/2004 16:00:00	0	0	0	0	0	0	0	0	0	0	0	0	0
18/01/2004 17:00:00	0	0	0	0	0	0	0	0	0	0	0	0	0
18/01/2004 18:00:00	0	0	0	0	0	0	0	0	0	0	0	0	0
18/01/2004 19:00:00	0	0	0	0	0	0	0	0	0	0	0	0	0
18/01/2004 20:00:00	0	0	0	0	0	0	0	0	0	0	0	0	0
18/01/2004 21:00:00	0	0	0	0	0	0	0	0	0	0	0	0	0
18/01/2004 22:00:00	0	0	0	0	0	0	0	0	0	0	0	0	0
18/01/2004 23:00:00	0	0	0	0	0	0	0	0	0	0	0	0	0
19/01/2004 00:00:00	0	0	0	0	0	0	0	0	0	0	0	0	0
19/01/2004 01:00:00	0	0	0	0	0	0	0	0	0	0	0	0	0
19/01/2004 02:00:00	0	0	0	0	0	0	0	0	0	0	0	0	0
19/01/2004 03:00:00	0	0	0	0	0	0	0	0	0	0	0	0	0
19/01/2004 04:00:00	0	0	0	0	0	0	0	0	0	0	0	0	0
19/01/2004 05:00:00	0	0	0	0	0	0	0	0	0	0	0	0	0
19/01/2004 06:00:00	0	0	0	0	0	0	0	0	0	0	0	0	0
19/01/2004 07:00:00	0	0	0	0	0	0	0	0	0	0	0	0	0
19/01/2004 08:00:00	0	0	0	0	0	0	0	0	0	0	0	0	0
19/01/2004 09:00:00	0	0	0	0	0	0	0	0	0	0	0	0	0
19/01/2004 10:00:00	0	0	0	0	0	0	0	0	0	0	0	0	0
19/01/2004 11:00:00	0	0	0	0	0	0	0	0	0	0	0	0	0
19/01/2004 12:00:00	0	0	0	0	0	0	0	0	0	0	0	0	0
19/01/2004 13:00:00	0	0	0	0	0	0	0	0	0	0	0	0	0
19/01/2004 14:00:00	0	0	0	0	0	0	0	0	0	0	0	0	0
19/01/2004 15:00:00	0	0	0	0	0	0	0	0	0	0	0	0	0
19/01/2004 16:00:00	0	0	0	0	0	0	0	0	0	0	0	0	0
19/01/2004 17:00:00	0	0	0	0	0	0	0	0	0	0	0	0	0
19/01/2004 18:00:00	0	0	0	0	0	0	0	0	0	0	0	0	0
19/01/2004 19:00:00	0	0	0	0	0	0	0	0	0	0	0	0	0
19/01/2004 20:00:00	0	0	0	0	0	0	0	0	0	0	0	0	0
19/01/2004 21:00:00	0	0	0	0	0	0	0	0	0	0	0	0	0
19/01/2004 22:00:00	0	0	0	0	0	0	0	0	0	0	0	0	0
19/01/2004 23:00:00	0	0	0	0	0	0	0	0	0	0	0	0	0
20/01/2004 00:00:00	0	0	0	0	0	0	0	0	0	0	0	0	0
20/01/2004 01:00:00	0	0	0	0	0	0	0	0	0	0	0	0	0
20/01/2004 02:00:00	0	0	0	0	0	0	0	0	0	0	0	0	0
20/01/2004 03:00:00	0	0	0	0	0	0	0	0	0	0	0	0	0
20/01/2004 04:00:00	0	0	0	0	0	0	0	0	0	0	0	0	0
20/01/2004 05:00:00	0	0	0	0	0	0	0	0	0	0	0	0	0
20/01/2004 06:00:00	0	0	0	0	0	0	0	0	0	0	0	0	0
20/01/2004 07:00:00	0	0	0	0	0	0	0	0	0	0	0	0	0
20/01/2004 08:00:00	0	0	0	0	0	0	0	0	0	0	0	0	0
20/01/2004 09:00:00	0	0	0	0	0	0	0	0	0	0	0	0	0
20/01/2004 10:00:00	0	0	0	0	0	0	0	0	0	0	0	0	0
20/01/2004 11:00:00	0	0	0	0	0	0	0	0	0	0	0	0	0
20/01/2004 12:00:00	0	0	0	0	0	0	0	0	0	0	0	0	0
20/01/2004 13:00:00	0	0	0	0	0	0	0	0	0	0	0	0	0
20/01/2004 14:00:00	0	0	0	0	0	0	0	0	0	0	0	0	0
20/01/2004 15:00:00	0	0	0	0	0	0	0	0	0	0	0	0	0
20/01/2004 16:00:00	0	0	0	0	0	0	0	0	0	0	0	0	0
20/01/2004 17:00:00	0	0	0	0	0	0	0	0	0	0	0	0	0
20/01/2004 18:00:00	0	0	0	0	0	0	0	0	0	0	0	0	0
20/01/2004 19:00:00	0	0	0	0	0	0	0	0	0	0	0	0	0
20/01/2004 20:00:00	0	0	0	0	0	0	0	0	0	0	0	0	0
20/01/2004 21:00:00	0	0	0	0	0	0	0	0	0	0	0	0	0
20/01/2004 22:00:00	0	0	0	0	0	0	0	0	0	0	0	0	0
20/01/2004 23:00:00	0	0	0	0	0	0	0	0	0	0	0	0	0
21/01/2004 00:00:00	0	0	0	0	0	0	0	0	0	0	0	0	0
21/01/2004 01:00:00	0	0	0	0	0	0	0	0	0	0	0	0	0
21/01/2004 02:00:00	0	0	0	0	0	0	0	0	0	0	0	0	0
21/01/2004 03:00:00	0	0	0	0	0	0	0	0	0	0	0	0	0
21/01/2004 04:00:00	0	0	0	0	0	0	0	0	0	0	0	0	0
21/01/2004 05:00:00	0	0	0	0	0	0	0	0	0	0	0	0	0
21/01/2004 06:00:00	0	0	0	0	0	0	0	0	0	0	0	0	0
21/01/2004 07:00:00	0	0	0	0	0	0	0	0	0	0	0	0	0
21/01/2004 08:00:00	0	0	0	0	0	0	0	0	0	0	0	0	0
21/01/2004 09:00:00	0	0	0	0	0	0	0	0	0	0	0	0	0
21/01/2004 10:00:00	0	0	0	0	0	0	0	0	0	0	0	0	0
21/01/2004 11:00:00	0	0	0	0	0	0	0	0	0	0	0	0	0
21/01/2004 12:00:00	0	0	0	0	0	0	0	0	0	0	0	0	0
21/01/2004 13:00:00	0	0	0	0	0	0	0	0	0	0	0	0	0
21/01/2004 14:00:00	0	0	0	0	0	0	0	0	0	0	0	0	0
21/01/2004 15:00:00	0	0	0	0	0	0	0	0	0	0	0	0	0
21/01/2004 16:00:00	0	0	0	0	0	0	0	0	0	0	0	0	0
21/01/2004 17:00:00	0	0	0	0	0	0	0	0	0	0	0	0	0
21/01/2004 18:00:00	0	0	0	0	0	0	0	0	0	0	0	0	0
21/01/2004 19:00:00	0	0	0	0	0	0	0	0	0	0	0	0	0
21/01/2004 20:00:00	0	0	0	0	0	0	0	0	0	0	0	0	0
21/01/2004 21:00:00	0	0	0	0	0	0	0	0	0	0	0	0	0
21/01/2004 22:00:00	0	0	0	0	0	0	0	0	0	0	0	0	0
21/01/2004 23:00:00	0	0	0	0	0	0	0	0	0	0	0	0	0
22/01/2004 00:00:00	0	0	0	0	0	0	0	0	0	0	0	0	0
22/01/2004 01:00:00	0	0	0	0	0	0	0	0	0	0	0	0	0
22/01/2004 02:00:00	0	0	0	0	0	0	0	0	0	0	0	0	0
22/01/2004 03:00:00	0	0	0	0	0	0	0	0	0	0	0	0	0
22/01/2004 04:00:00	0	0	0	0	0	0	0	0	0	0	0	0	0
22/01/2004 05:00:00	0	0	0	0	0	0	0	0	0	0	0	0	0
22/01/2004 06:00:00	0	0	0	0	0	0	0	0	0	0	0	0	0
22/01/2004 07:00:00	0	0	0	0	0	0	0	0	0	0	0	0	0
22/01/2004 08:00:00	0	0	0	0	0	0	0	0	0	0	0	0	0
22/01/2004 09:00:00	0	0	0	0	0	0	0	0	0	0	0	0	0
22/01/2004 10:00:00	0	0	0	0	0	0	0	0	0	0	0	0	0
22/01/2004 11:00:00	0	0	0	0	0	0	0	0	0	0	0	0	0
22/01/2004 12:00:00	0	0	0	0	0	0	0	0	0	0	0	0	0
22/01/2004 13:00:00	0	0	0	0	0	0	0	0	0	0	0	0	0
22/01/2004 14:00:00	0	0	0	0	0	0	0	0	0	0	0	0	0
22/01/2004 15:00:00	0	0	0	0	0	0	0	0	0	0	0	0	0
22/01/2004 16:00:00	0	0	0	0	0	0	0	0	0	0	0	0	0
22/01/2004 17:00:00	0	0	0	0	0	0	0	0	0	0	0	0	0
22/01/2004 18:00:00	0	0	0	0	0	0	0	0	0	0	0	0	0
22/01/2004 19:00:00	0	0	0	0	0	0	0	0	0	0	0	0	0
22/01/2004 20:00:00	0	0	0	0	0	0	0	0	0	0	0	0	0
22/01/2004 21:00:00	0	0	0	0	0	0	0	0	0	0	0	0	0
22/01/2004 22:00:00	0	0	0	0	0	0	0	0	0	0	0	0	0
22/01/2004 23:00:00	0	0	0	0	0	0	0	0	0	0	0	0	0
23/01/2004 00:00:00	0	0	0	0	0	0	0	0	0	0	0	0	0
23/01/2004 01:00:00	0	0	0	0	0	0	0	0	0	0	0	0	0
23/01/2004 02:00:00	0	0	0	0	0	0	0	0	0	0	0	0	0
23/01/2004 03:00:00	0	0	0	0	0	0	0	0	0	0	0	0	0
23/01/2004 04:00:00	0	0	0	0	0	0	0	0	0	0	0	0	0
23/01/2004 05:00:00	0	0	0	0	0	0	0	0	0	0	0	0	0
23/01/2004 06:00:00	0	0	0	0	0	0	0	0	0	0	0	0	0
23/01/2004 07:00:00	0	0	0	0	0	0	0	0	0	0	0	0	0
23/01/2004 08:00:00	0	0	0	0	0	0	0	0	0	0	0	0	0
23/01/2004 09:00:00	0	0	0	0	0	0	0	0	0	0	0	0	0
23/01/2004 10:00:00	0	0	0	0	0	0	0	0	0	0	0	0	0
23/01/2004 11:00:00	0	0	0	0	0	0	0	0	0	0	0	0	0
23/01/2004 12:00:00	0	0	0	0	0	0	0	0	0	0	0	0	0
23/01/2004 13:00:00	0	0	0	0	0	0	0	0	0	0	0	0	0
23/01/2004 14:00:00	0	0	0	0	0	0	0	0	0	0	0	0	0
23/01/2004 15:00:00	0	0	0	0	0	0	0	0	0	0	0	0	0
23/01/2004 16:00:00	0	0	0	0	0	0	0	0	0	0	0	0	0
23/01/2004 17:00:00	0	0	0	0	0	0	0	0	0	0	0	0	0
23/01/2004 18:00:00	0	0	0	0	0	0	0	0	0	0	0	0	0
23/01/2004 19:00:00	0	0	0	0	0	0	0	0	0	0	0	0	0
23/01/2004 20:00:00	0	0	0	0	0	0	0	0	0	0	0	0	0
23/01/2004 21:00:00	0	0	0	0	0	0	0	0	0	0	0	0	0
23/01/2004 22:00:00	0	0	0	0	0	0	0	0	0	0	0	0	0
23/01/2004 23:00:00	0	0	0	0	0	0	0	0	0	0	0	0	0
24/01/2004 00:00:00	0	0	0	0	0	0	0	0	0	0	0	0	0
24/01/2004 01:00:00	0	0	0	0	0	0	0	0	0	0	0	0	0
24/01/2004 02:00:00	0	0	0	0	0	0	0	0	0	0	0	0	0
24/01/2004 03:00:00	0	0	0	0	0	0	0	0	0	0	0	0	0
24/01/2004 04:00:00	0	0	0	0	0	0	0	0	0	0	0	0	0
24/01/2004 05:00:00	0	0	0	0	0	0	0	0	0	0	0	0	0
24/01/2004 06:00:00	0	0	0	0	0	0	0	0	0	0	0	0	0
24/01/2004 07:00:00	0	0	0	0	0	0	0	0	0	0	0	0	0
24/01/2004 08:00:00	0	0	0	0	0	0	0	0	0	0	0	0	0
24/01/2004 09:00:00	0	0	0	0	0	0	0	0	0	0	0	0	0
24/01/2004 10:00:00	0	0	0	0	0	0	0	0	0	0	0	0	0
24/01/2004 11:00:00	0	0	0	0	0	0	0	0	0	0	0	0	0
24/01/2004 12:00:00	0	0	0	0	0	0	0	0	0	0	0	0	0
24/01/2004 13:00:00	0	0	0	0	0	0	0	0	0	0	0	0	0
24/01/2004 14:00:00	0	0	0	0	0	0	0	0	0	0	0	0	0
24/01/2004 15:00:00	0	0	0	0	0	0	0	0	0	0	0	0	0
24/01/2004 16:00:00	0	0	0	0	0	0	0	0	0	0	0	0	0
24/01/2004 17:00:00	0	0	0	0	0	0	0	0	0	0	0	0	0
24/01/2004 18:00:00	0	0	0	0	0	0	0	0	0	0	0	0	0
24/01/2004 19:00:00	0	0	0	0	0	0	0	0	0	0	0	0	0
24/01/2004 20:00:00	0	0	0	0	0	0	0	0	0	0	0	0	0
24/01/2004 21:00:00	0	0	0	0	0	0	0	0	0	0	0	0	0
24/01/2004 22:00:00	0	0	0	0	0	0	0	0	0	0	0	0	0
24/01/2004 23:00:00	0	0	0	0	0	0	0	0	0	0	0	0	0
25/01/2004 00:00:00	0	0	0	0	0	0	0	0	0	0	0	0	0
25/01/2004 01:00:00	0	0	0	0	0	0	0	0	0	0	0	0	0
25/01/2004 02:00:00	0	0	0	0	0	0	0	0	0	0	0	0	0
25/01/2004 03:00:00	0	0	0	0	0	0	0	0	0	0	0	0	0
25/01/2004 04:00:00	0	0	0	0	0	0	0	0	0	0	0	0	0
25/01/2004 05:00:00	0	0	0	0	0	0	0	0	0	0	0	0	0
25/01/2004 06:00:00	0	0	0	0	0	0	0	0	0	0	0	0	0
25/01/2004 07:00:00	0	0	0	0	0	0	0	0	0	0	0	0	0
25/01/2004 08:00:00	0	0	0	0	0	0	0	0	0	0	0	0	0
25/01/2004 09:00:00	0	0	0	0	0	0	0	0	0	0	0	0	0
25/01/2004 10:00:00	0	0	0	0	0	0	0	0	0	0	0	0	0
25/01/2004 11:00:00	0	0	0	0	0	0	0	0	0	0	0	0	0
25/01/2004 12:00:00	0	0	0	0	0	0	0	0	0	0	0	0	0
25/01/2004 13:00:00	0	0	0	0	0	0	0	0	0	0	0	0	0
25/01/2004 14:00:00	0	0	0	0	0	0	0	0	0	0	0	0	0
25/01/2004 15:00:00	0	0	0	0	0	0	0	0	0	0	0	0	0
25/01/2004 16:00:00	0	0	0	0	0	0	0	0	0	0	0	0	0
25/01/2004 17:00:00	0	0	0	0	0	0	0	0	0	0	0	0	0
25/01/2004 18:00:00	0	0	0	0	0	0	0	0	0	0	0	0	0
25/01/2004 19:00:00	0	0	0	0	0	0	0	0	0	0	0	0	0
25/01/2004 20:00:00	0	0	0	0	0	0	0	0	0	0	0	0	0
25/01/2004 21:00:00	0	0	0	0	0	0	0	0	0	0	0	0	0
25/01/2004 22:00:00	0	0	0	0	0	0	0	0	0	0	0	0	0
25/01/2004 23:00:00	0	0	0	0	0	0	0	0	0	0	0	0	0
26/01/2004 00:00:00	0	0	0	0	0	0	0	0	0	0	0	0	0
26/01/2004 01:00:00	0	0	0	0	0	0	0	0	0	0	0	0	0
26/01/2004 02:00:00	0	0	0	0	0	0	0	0	0	0	0	0	0
26/01/2004 03:00:00	0	0	0	0	0	0	0	0	0	0	0	0	0
26/01/2004 04:00:00	0	0	0	0	0	0	0	0	0	0	0	0	0
26/01/2004 05:00:00	0	0	0	0	0	0	0	0	0	0	0	0	0
26/01/2004 06:00:00	0	0	0	0	0	0	0	0	0	0	0	0	0
26/01/2004 07:00:00	0	0	0	0	0	0	0	0	0	0	0	0	0
26/01/2004 08:00:00	0	0	0	0	0	0	0	0	0	0	0	0	0
26/01/2004 09:00:00	0	0	0	0	0	0	0	0	0	0	0	0	0
26/01/2004 10:00:00	0	0	0	0	0	0	0	0	0	0	0	0	0
26/01/2004 11:00:00	0	0	0	0	0	0	0	0	0	0	0	0	0
26/01/2004 12:00:00	0	0	0	0	0	0	0	0	0	0	0	0	0
26/01/2004 13:00:00	0	0	0	0	0	0	0	0	0	0	0	0	0
26/01/2004 14:00:00	0	0	0	0	0	0	0	0	0	0	0	0	0
26/01/2004 15:00:00	0	0	0	0	0	0	0	0	0	0	0	0	0
26/01/2004 16:00:00	0	0	0	0	0	0	0	0	0	0	0	0	0
26/01/2004 17:00:00	0	0	0	0	0	0	0	0	0	0	0	0	0
26/01/2004 18:00:00	0	0	0	0	0	0	0	0	0	0	0	0	0
26/01/2004 19:00:00	0	0	0	0	0	0	0	0	0	0	0	0	0
26/01/2004 20:00:00	0	0	0	0	0	0	0	0	0	0	0	0	0
26/01/2004 21:00:00	0	0	0	0	0	0	0	0	0	0	0	0	0
26/01/2004 22:00:00	0	0	0	0	0	0	0	0	0	0	0	0	0
26/01/2004 23:00:00	0	0	0	0	0	0	0	0	0	0	0	0	0
27/01/2004 00:00:00	0	0	0	0	0	0	0	0	0	0	0	0	0
27/01/2004 01:00:00	0	0	0	0	0	0	0	0	0	0	0	0	0
27/01/2004 02:00:00	0	0	0	0	0	0	0	0	0	0	0	0	0
27/01/2004 03:00:00	0	0	0	0	0	0	0	0	0	0	0	0	0
27/01/2004 04:00:00	0	0	0	0	0	0	0	0	0	0	0	0	0
27/01/2004 05:00:00	0	0	0	0	0	0	0	0	0	0	0	0	0
27/01/2004 06:00:00	0	0	0	0	0	0	0	0	0	0	0	0	0
27/01/2004 07:00:00	0	0	0	0	0	0	0	0	0	0	0	0	0
27/01/2004 08:00:00	0	0	0	0	0	0	0	0	0	0	0	0	0
27/01/2004 09:00:00	0	0	0	0	0	0	0	0	0	0	0	0	0
27/01/2004 10:00:00	0	0	0	0	0	0	0	0	0	0	0	0	0
27/01/2004 11:00:00	0	0	0	0	0	0	0	0	0	0	0	0	0
27/01/2004 12:00:00	0	0	0	0	0	0	0	0	0	0	0	0	0
27/01/2004 13:00:00	0	0	0	0	0	0	0	0	0	0	0	0	0
27/01/2004 14:00:00	0	0	0	0	0	0	0	0	0	0	0	0	0
27/01/2004 15:00:00	0	0	0	0	0	0	0	0	0	0	0	0	0
27/01/2004 16:00:00	0	0	0	0	0	0	0	0	0	0	0	0	0
27/01/2004 17:00:00	0	0	0	0	0	0	0	0	0	0	0	0	0
27/01/2004 18:00:00	0	0	0	0	0	0	0	0	0	0	0	0	0
27/01/2004 19:00:00	0	0	0	0	0	0	0	0	0	0	0	0	0
27/01/2004 20:00:00	0	0	0	0	0	0	0	0	0	0	0	0	0
27/01/2004 21:00:00	0	0	0	0	0	0	0	0	0	0	0	0	0
27/01/2004 22:00:00	0	0	0	0	0	0	0	0	0	0	0	0	0
27/01/2004 23:00:00	0	0	0	0	0	0	0	0	0	0	0	0	0
28/01/2004 00:00:00	0	0	0	0	0	0	0	0	0	0	0	0	0
28/01/2004 01:00:00	0	0	0	0	0	0	0	0	0	0	0	0	0
28/01/2004 02:00:00	0	0	0	0	0	0	0	0	0	0	0	0	0
28/01/2004 03:00:00	0	0	0	0	0	0	0	0	0	0	0	0	0
28/01/2004 04:00:00	0	0	0	0	0	0	0	0	0	0	0	0	0
28/01/2004 05:00:00	0	0	0	0	0	0	0	0	0	0	0	0	0
28/01/2004 06:00:00	0	0	0	0	0	0	0	0	0	0	0	0	0
28/01/2004 07:00:00	0	0	0	0	0	0	0	0	0	0	0	0	0
28/01/2004 08:00:00	0	0	0	0	0	0	0	0	0	0	0	0	0
28/01/2004 09:00:00	0	0	0	0	0	0	0	0	0	0	0	0	0
28/01/2004 10:00:00	0	0	0	0	0	0	0	0	0	0	0	0	0
28/01/2004 11:00:00	0	0	0	0	0	0	0	0	0	0	0	0	0
28/01/2004 12:00:00	0	0	0	0	0	0	0	0	0	0	0	0	0
28/01/2004 13:00:00	0	0	0	0	0	0	0	0	0	0	0	0	0
28/01/2004 14:00:00	0	0	0	0	0	0	0	0	0	0	0	0	0
28/01/2004 15:00:00	0	0	0	0	0	0	0	0	0	0	0	0	0
28/01/2004 16:00:00	0	0	0	0	0	0	0	0	0	0	0	0	0
28/01/2004 17:00:00	0	0	0	0	0	0	0	0	0	0	0	0	0
28/01/2004 18:00:00	0	0	0	0	0	0	0	0	0	0	0	0	0
28/01/2004 19:00:00	0	0	0	0	0	0	0	0	0	0	0	0	0
28/01/2004 20:00:00	0	0	0	0	0	0	0	0	0	0	0	0	0
28/01/2004 21:00:00	0	0	0	0	0	0	0	0	0	0	0	0	0
28/01/2004 22:00:00	0	0	0	0	0	0	0	0	0	0	0	0	0
28/01/2004 23:00:00	0	0	0	0	0	0	0	0	0	0	0	0	0
29/01/2004 00:00:00	0	0	0	0	0	0	0	0	0.083333333	0	0	0	0
29/01/2004 01:00:00	0	0	0	0	0	0	0	0	0.083333333	0	0	0	0
29/01/2004 02:00:00	0	0	0	0	0	0	0	0	0.083333333	0	0	0	0
29/01/2004 03:00:00	0	0	0	0	0	0	0	0	0.083333333	0	0	0	0
29/01/2004 04:00:00	0	0	0	0	0	0	0	0	0.083333333	0	0	0	0
29/01/2004 05:00:00	0	0	0	0	0	0	0	0	0.083333333	0	0	0	0
29/01/2004 06:00:00	0	0	0	0	0	0	0	0	0.083333333	0	0	0	0
29/01/2004 07:00:00	0	0	0	0	0	0	0	0	0.083333333	0	0	0	0
29/01/2004 08:00:00	0	0	0	0	0	0	0	0	0.083333333	0	0	0	0
29/01/2004 09:00:00	0	0	0	0	0	0	0	0	0.083333333	0	0	0	0
29/01/2004 10:00:00	0	0	0	0	0	0	0	0	0.083333333	0	0	0	0
29/01/2004 11:00:00	0	0	0	0	0	0	0	0	0.083333333	0	0	0	0
29/01/2004 12:00:00	0	0	0	0	0	0	0	0	0.083333333	0	0	0	0
29/01/2004 13:00:00	0	0	0	0	0	0	0	0	0.083333333	0	0	0	0
29/01/2004 14:00:00	0	0	0	0	0	0	0	0	0.083333333	0	0	0	0
29/01/2004 15:00:00	0	0	0	0	0	0	0	0	0.083333333	0	0	0	0
29/01/2004 16:00:00	0	0	0	0	0	0	0	0	0.083333333	0	0	0	0
29/01/2004 17:00:00	0	0	0	0	0	0	0	0	0.083333333	0	0	0	0
29/01/2004 18:00:00	0	0	0	0	0	0	0	0	0.083333333	0	0	0	0
29/01/2004 19:00:00	0	0	0	0	0	0	0	0	0.083333333	0	0	0	0
29/01/2004 20:00:00	0	0	0	0	0	0	0	0	0.083333333	0	0	0	0
29/01/2004 21:00:00	0	0	0	0	0	0	0	0	0.083333333	0	0	0	0
29/01/2004 22:00:00	0	0	0	0	0	0	0	0	0.083333333	0	0	0	0
29/01/2004 23:00:00	0	0	0	0	0	0	0	0	0.083333333	0	0	0	0
30/01/2004 00:00:00	0	0	0	0	0	0	0	0	0	0	0	0	0
30/01/2004 01:00:00	0	0	0	0	0	0	0	0	0	0	0	0	0
30/01/2004 02:00:00	0	0	0	0	0	0	0	0	0	0	0	0	0
30/01/2004 03:00:00	0	0	0	0	0	0	0	0	0	0	0	0	0
30/01/2004 04:00:00	0	0	0	0	0	0	0	0	0	0	0	0	0
30/01/2004 05:00:00	0	0	0	0	0	0	0	0	0	0	0	0	0
30/01/2004 06:00:00	0	0	0	0	0	0	0	0	0	0	0	0	0
30/01/2004 07:00:00	0	0	0	0	0	0	0	0	0	0	0	0	0
30/01/2004 08:00:00	0	0	0	0	0	0	0	0	0	0	0	0	0
30/01/2004 09:00:00	0	0	0	0	0	0	0	0	0	0	0	0	0
30/01/2004 10:00:00	0	0	0	0	0	0	0	0	0	0	0	0	0
30/01/2004 11:00:00	0	0	0	0	0	0	0	0	0	0	0	0	0
30/01/2004 12:00:00	0	0	0	0	0	0	0	0	0	0	0	0	0
30/01/2004 13:00:00	0	0	0	0	0	0	0	0	0	0	0	0	0
30/01/2004 14:00:00	0	0	0	0	0	0	0	0	0	0	0	0	0
30/01/2004 15:00:00	0	0	0	0	0	0	0	0	0	0	0	0	0
30/01/2004 16:00:00	0	0	0	0	0	0	0	0	0	0	0	0	0
30/01/2004 17:00:00	0	0	0	0	0	0	0	0	0	0	0	0	0
30/01/2004 18:00:00	0	0	0	0	0	0	0	0	0	0	0	0	0
30/01/2004 19:00:00	0	0	0	0	0	0	0	0	0	0	0	0	0
30/01/2004 20:00:00	0	0	0	0	0	0	0	0	0	0	0	0	0
30/01/2004 21:00:00	0	0	0	0	0	0	0	0	0	0	0	0	0
30/01/2004 22:00:00	0	0	0	0	0	0	0	0	0	0	0	0	0
30/01/2004 23:00:00	0	0	0	0	0	0	0	0	0	0	0	0	0
31/01/2004 00:00:00	0	0	0	0	0	0	0	0	0	0	0	0	0
31/01/2004 01:00:00	0	0	0	0	0	0	0	0	0	0	0	0	0
31/01/2004 02:00:00	0	0	0	0	0	0	0	0	0	0	0	0	0
31/01/2004 03:00:00	0	0	0	0	0	0	0	0	0	0	0	0	0
31/01/2004 04:00:00	0	0	0	0	0	0	0	0	0	0	0	0	0
31/01/2004 05:00:00	0	0	0	0	0	0	0	0	0	0	0	0	0
31/01/2004 06:00:00	0	0	0	0	0	0	0	0	0	0	0	0	0
31/01/2004 07:00:00	0	0	0	0	0	0	0	0	0	0	0	0	0
31/01/2004 08:00:00	0	0	0	0	0	0	0	0	0	0	0	0	0
31/01/2004 09:00:00	0	0	0	0	0	0	0	0	0	0	0	0	0
31/01/2004 10:00:00	0	0	0	0	0	0	0	0	0	0	0	0	0
31/01/2004 11:00:00	0	0	0	0	0	0	0	0	0	0	0	0	0
31/01/2004 12:00:00	0	0	0	0	0	0	0	0	0	0	0	0	0
31/01/2004 13:00:00	0	0	0	0	0	0	0	0	0	0	0	0	0
31/01/2004 14:00:00	0	0	0	0	0	0	0	0	0	0	0	0	0
31/01/2004 15:00:00	0	0	0	0	0	0	0	0	0	0	0	0	0
31/01/2004 16:00:00	0	0	0	0	0	0	0	0	0	0	0	0	0
31/01/2004 17:00:00	0	0	0	0	0	0	0	0	0	0	0	0	0
31/01/2004 18:00:00	0	0	0	0	0	0	0	0	0	0	0	0	0
31/01/2004 19:00:00	0	0	0	0	0	0	0	0	0	0	0	0	0
31/01/2004 20:00:00	0	0	0	0	0	0	0	0	0	0	0	0	0
31/01/2004 21:00:00	0	0	0	0	0	0	0	0	0	0	0	0	0
31/01/2004 22:00:00	0	0	0	0	0	0	0	0	0	0	0	0	0
31/01/2004 23:00:00	0	0	0	0	0	0	0	0	0	0	0	0	0
01/02/2004 00:00:00	0	0	0	0	0	0	0	0	0	0	0	0	0
01/02/2004 01:00:00	0	0	0	0	0	0	0	0	0	0	0	0	0
01/02/2004 02:00:00	0	0	0	0	0	0	0	0	0	0	0	0	0
01/02/2004 03:00:00	0	0	0	0	0	0	0	0	0	0	0	0	0
01/02/2004 04:00:00	0	0	0	0	0	0	0	0	0	0	0	0	0
01/02/2004 05:00:00	0	0	0	0	0	0	0	0	0	0	0	0	0
01/02/2004 06:00:00	0	0	0	0	0	0	0	0	0	0	0	0	0
01/02/2004 07:00:00	0	0	0	0	0	0	0	0	0	0	0	0	0
01/02/2004 08:00:00	0	0	0	0	0	0	0	0	0	0	0	0	0
01/02/2004 09:00:00	0	0	0	0	0	0	0	0	0	0	0	0	0
01/02/2004 10:00:00	0	0	0	0	0	0	0	0	0	0	0	0	0
01/02/2004 11:00:00	0	0	0	0	0	0	0	0	0	0	0	0	0
01/02/2004 12:00:00	0	0	0	0	0	0	0	0	0	0	0	0	0
01/02/2004 13:00:00	0	0	0	0	0	0	0	0	0	0	0	0	0
01/02/2004 14:00:00	0	0	0	0	0	0	0	0	0	0	0	0	0
01/02/2004 15:00:00	0	0	0	0	0	0	0	0	0	0	0	0	0
01/02/2004 16:00:00	0	0	0	0	0	0	0	0	0	0	0	0	0
01/02/2004 17:00:00	0	0	0	0	0	0	0	0	0	0	0	0	0
01/02/2004 18:00:00	0	0	0	0	0	0	0	0	0	0	0	0	0
01/02/2004 19:00:00	0	0	0	0	0	0	0	0	0	0	0	0	0
01/02/2004 20:00:00	0	0	0	0	0	0	0	0	0	0	0	0	0
01/02/2004 21:00:00	0	0	0	0	0	0	0	0	0	0	0	0	0
01/02/2004 22:00:00	0	0	0	0	0	0	0	0	0	0	0	0	0
01/02/2004 23:00:00	0	0	0	0	0	0	0	0	0	0	0	0	0
02/02/2004 00:00:00	0	0	0	0	0	0	0	0	0	0	0	0	0
02/02/2004 01:00:00	0	0	0	0	0	0	0	0	0	0	0	0	0
02/02/2004 02:00:00	0	0	0	0	0	0	0	0	0	0	0	0	0
02/02/2004 03:00:00	0	0	0	0	0	0	0	0	0	0	0	0	0
02/02/2004 04:00:00	0	0	0	0	0	0	0	0	0	0	0	0	0
02/02/2004 05:00:00	0	0	0	0	0	0	0	0	0	0	0	0	0
02/02/2004 06:00:00	0	0	0	0	0	0	0	0	0	0	0	0	0
02/02/2004 07:00:00	0	0	0	0	0	0	0	0	0	0	0	0	0
02/02/2004 08:00:00	0	0	0	0	0	0	0	0	0	0	0	0	0
02/02/2004 09:00:00	0	0	0	0	0	0	0	0	0	0	0	0	0
02/02/2004 10:00:00	0	0	0	0	0	0	0	0	0	0	0	0	0
02/02/2004 11:00:00	0	0	0	0	0	0	0	0	0	0	0	0	0
02/02/2004 12:00:00	0	0	0	0	0	0	0	0	0	0	0	0	0
02/02/2004 13:00:00	0	0	0	0	0	0	0	0	0	0	0	0	0
02/02/2004 14:00:00	0	0	0	0	0	0	0	0	0	0	0	0	0
02/02/2004 15:00:00	0	0	0	0	0	0	0	0	0	0	0	0	0
02/02/2004 16:00:00	0	0	0	0	0	0	0	0	0	0	0	0	0
02/02/2004 17:00:00	0	0	0	0	0	0	0	0	0	0	0	0	0
02/02/2004 18:00:00	0	0	0	0	0	0	0	0	0	0	0	0	0
02/02/2004 19:00:00	0	0	0	0	0	0	0	0	0	0	0	0	0
02/02/2004 20:00:00	0	0	0	0	0	0	0	0	0	0	0	0	0
02/02/2004 21:00:00	0	0	0	0	0	0	0	0	0	0	0	0	0
02/02/2004 22:00:00	0	0	0	0	0	0	0	0	0	0	0	0	0
02/02/2004 23:00:00	0	0	0	0	0	0	0	0	0	0	0	0	0
03/02/2004 00:00:00	0	0	0	0	0	0	0	0	0	0	0	0	0
03/02/2004 01:00:00	0	0	0	0	0	0	0	0	0	0	0	0	0
03/02/2004 02:00:00	0	0	0	0	0	0	0	0	0	0	0	0	0
03/02/2004 03:00:00	0	0	0	0	0	0	0	0	0	0	0	0	0
03/02/2004 04:00:00	0	0	0	0	0	0	0	0	0	0	0	0	0
03/02/2004 05:00:00	0	0	0	0	0	0	0	0	0	0	0	0	0
03/02/2004 06:00:00	0	0	0	0	0	0	0	0	0	0	0	0	0
03/02/2004 07:00:00	0	0	0	0	0	0	0	0	0	0	0	0	0
03/02/2004 08:00:00	0	0	0	0	0	0	0	0	0	0	0	0	0
03/02/2004 09:00:00	0	0	0	0	0	0	0	0	0	0	0	0	0
03/02/2004 10:00:00	0	0	0	0	0	0	0	0	0	0	0	0	0
03/02/2004 11:00:00	0	0	0	0	0	0	0	0	0	0	0	0	0
03/02/2004 12:00:00	0	0	0	0	0	0	0	0	0	0	0	0	0
03/02/2004 13:00:00	0	0	0	0	0	0	0	0	0	0	0	0	0
03/02/2004 14:00:00	0	0	0	0	0	0	0	0	0	0	0	0	0
03/02/2004 15:00:00	0	0	0	0	0	0	0	0	0	0	0	0	0
03/02/2004 16:00:00	0	0	0	0	0	0	0	0	0	0	0	0	0
03/02/2004 17:00:00	0	0	0	0	0	0	0	0	0	0	0	0	0
03/02/2004 18:00:00	0	0	0	0	0	0	0	0	0	0	0	0	0
03/02/2004 19:00:00	0	0	0	0	0	0	0	0	0	0	0	0	0
03/02/2004 20:00:00	0	0	0	0	0	0	0	0	0	0	0	0	0
03/02/2004 21:00:00	0	0	0	0	0	0	0	0	0	0	0	0	0
03/02/2004 22:00:00	0	0	0	0	0	0	0	0	0	0	0	0	0
03/02/2004 23:00:00	0	0	0	0	0	0	0	0	0	0	0	0	0
04/02/2004 00:00:00	0	0	0	0	0	0	0	0	0	0	0	0	0
04/02/2004 01:00:00	0	0	0	0	0	0	0	0	0	0	0	0	0
04/02/2004 02:00:00	0	0	0	0	0	0	0	0	0	0	0	0	0
04/02/2004 03:00:00	0	0	0	0	0	0	0	0	0	0	0	0	0
04/02/2004 04:00:00	0	0	0	0	0	0	0	0	0	0	0	0	0
04/02/2004 05:00:00	0	0	0	0	0	0	0	0	0	0	0	0	0
04/02/2004 06:00:00	0	0	0	0	0	0	0	0	0	0	0	0	0
04/02/2004 07:00:00	0	0	0	0	0	0	0	0	0	0	0	0	0
04/02/2004 08:00:00	0	0	0	0	0	0	0	0	0	0	0	0	0
04/02/2004 09:00:00	0	0	0	0	0	0	0	0	0	0	0	0	0
04/02/2004 10:00:00	0	0	0	0	0	0	0	0	0	0	0	0	0
04/02/2004 11:00:00	0	0	0	0	0	0	0	0	0	0	0	0	0
04/02/2004 12:00:00	0	0	0	0	0	0	0	0	0	0	0	0	0
04/02/2004 13:00:00	0	0	0	0	0	0	0	0	0	0	0	0	0
04/02/2004 14:00:00	0	0	0	0	0	0	0	0	0	0	0	0	0
04/02/2004 15:00:00	0	0	0	0	0	0	0	0	0	0	0	0	0
04/02/2004 16:00:00	0	0	0	0	0	0	0	0	0	0	0	0	0
04/02/2004 17:00:00	0	0	0	0	0	0	0	0	0	0	0	0	0
04/02/2004 18:00:00	0	0	0	0	0	0	0	0	0	0	0	0	0
04/02/2004 19:00:00	0	0	0	0	0	0	0	0	0	0	0	0	0
04/02/2004 20:00:00	0	0	0	0	0	0	0	0	0	0	0	0	0
04/02/2004 21:00:00	0	0	0	0	0	0	0	0	0	0	0	0	0
04/02/2004 22:00:00	0	0	0	0	0	0	0	0	0	0	0	0	0
04/02/2004 23:00:00	0	0	0	0	0	0	0	0	0	0	0	0	0
05/02/2004 00:00:00	0	0	0	0	0	0	0	0	0	0	0	0	0
05/02/2004 01:00:00	0	0	0	0	0	0	0	0	0	0	0	0	0
05/02/2004 02:00:00	0	0	0	0	0	0	0	0	0	0	0	0	0
05/02/2004 03:00:00	0	0	0	0	0	0	0	0	0	0	0	0	0
05/02/2004 04:00:00	0	0	0	0	0	0	0	0	0	0	0	0	0
05/02/2004 05:00:00	0	0	0	0	0	0	0	0	0	0	0	0	0
05/02/2004 06:00:00	0	0	0	0	0	0	0	0	0	0	0	0	0
05/02/2004 07:00:00	0	0	0	0	0	0	0	0	0	0	0	0	0
05/02/2004 08:00:00	0	0	0	0	0	0	0	0	0	0	0	0	0
05/02/2004 09:00:00	0	0	0	0	0	0	0	0	0	0	0	0	0
05/02/2004 10:00:00	0	0	0	0	0	0	0	0	0	0	0	0	0
05/02/2004 11:00:00	0	0	0	0	0	0	0	0	0	0	0	0	0
05/02/2004 12:00:00	0	0	0	0	0	0	0	0	0	0	0	0	0
05/02/2004 13:00:00	0	0	0	0	0	0	0	0	0	0	0	0	0
05/02/2004 14:00:00	0	0	0	0	0	0	0	0	0	0	0	0	0
05/02/2004 15:00:00	0	0	0	0	0	0	0	0	0	0	0	0	0
05/02/2004 16:00:00	0	0	0	0	0	0	0	0	0	0	0	0	0
05/02/2004 17:00:00	0	0	0	0	0	0	0	0	0	0	0	0	0
05/02/2004 18:00:00	0	0	0	0	0	0	0	0	0	0	0	0	0
05/02/2004 19:00:00	0	0	0	0	0	0	0	0	0	0	0	0	0
05/02/2004 20:00:00	0	0	0	0	0	0	0	0	0	0	0	0	0
05/02/2004 21:00:00	0	0	0	0	0	0	0	0	0	0	0	0	0
05/02/2004 22:00:00	0	0	0	0	0	0	0	0	0	0	0	0	0
05/02/2004 23:00:00	0	0	0	0	0	0	0	0	0	0	0	0	0
06/02/2004 00:00:00	0	0	0	0	0	0	0	0	0	0	0	0	0
06/02/2004 01:00:00	0	0	0	0	0	0	0	0	0	0	0	0	0
06/02/2004 02:00:00	0	0	0	0	0	0	0	0	0	0	0	0	0
06/02/2004 03:00:00	0	0	0	0	0	0	0	0	0	0	0	0	0
06/02/2004 04:00:00	0	0	0	0	0	0	0	0	0	0	0	0	0
06/02/2004 05:00:00	0	0	0	0	0	0	0	0	0	0	0	0	0
06/02/2004 06:00:00	0	0	0	0	0	0	0	0	0	0	0	0	0
06/02/2004 07:00:00	0	0	0	0	0	0	0	0	0	0	0	0	0
06/02/2004 08:00:00	0	0	0	0	0	0	0	0	0	0	0	0	0
06/02/2004 09:00:00	0	0	0	0	0	0	0	0	0	0	0	0	0
06/02/2004 10:00:00	0	0	0	0	0	0	0	0	0	0	0	0	0
06/02/2004 11:00:00	0	0	0	0	0	0	0	0	0	0	0	0	0
06/02/2004 12:00:00	0	0	0	0	0	0	0	0	0	0	0	0	0
06/02/2004 13:00:00	0	0	0	0	0	0	0	0	0	0	0	0	0
06/02/2004 14:00:00	0	0	0	0	0	0	0	0	0	0	0	0	0
06/02/2004 15:00:00	0	0	0	0	0	0	0	0	0	0	0	0	0
06/02/2004 16:00:00	0	0	0	0	0	0	0	0	0	0	0	0	0
06/02/2004 17:00:00	0	0	0	0	0	0	0	0	0	0	0	0	0
06/02/2004 18:00:00	0	0	0	0	0	0	0	0	0	0	0	0	0
06/02/2004 19:00:00	0	0	0	0	0	0	0	0	0	0	0	0	0
06/02/2004 20:00:00	0	0	0	0	0	0	0	0	0	0	0	0	0
06/02/2004 21:00:00	0	0	0	0	0	0	0	0	0	0	0	0	0
06/02/2004 22:00:00	0	0	0	0	0	0	0	0	0	0	0	0	0
06/02/2004 23:00:00	0	0	0	0	0	0	0	0	0	0	0	0	0
07/02/2004 00:00:00	0	0	0	0	0	0	0	0	0	0	0	0	0
07/02/2004 01:00:00	0	0	0	0	0	0	0	0	0	0	0	0	0
07/02/2004 02:00:00	0	0	0	0	0	0	0	0	0	0	0	0	0
07/02/2004 03:00:00	0	0	0	0	0	0	0	0	0	0	0	0	0
07/02/2004 04:00:00	0	0	0	0	0	0	0	0	0	0	0	0	0
07/02/2004 05:00:00	0	0	0	0	0	0	0	0	0	0	0	0	0
07/02/2004 06:00:00	0	0	0	0	0	0	0	0	0	0	0	0	0
07/02/2004 07:00:00	0	0	0	0	0	0	0	0	0	0	0	0	0
07/02/2004 08:00:00	0	0	0	0	0	0	0	0	0	0	0	0	0
07/02/2004 09:00:00	0	0	0	0	0	0	0	0	0	0	0	0	0
07/02/2004 10:00:00	0	0	0	0	0	0	0	0	0	0	0	0	0
07/02/2004 11:00:00	0	0	0	0	0	0	0	0	0	0	0	0	0
07/02/2004 12:00:00	0	0	0	0	0	0	0	0	0	0	0	0	0
07/02/2004 13:00:00	0	0	0	0	0	0	0	0	0	0	0	0	0
07/02/2004 14:00:00	0	0	0	0	0	0	0	0	0	0	0	0	0
07/02/2004 15:00:00	0	0	0	0	0	0	0	0	0	0	0	0	0
07/02/2004 16:00:00	0	0	0	0	0	0	0	0	0	0	0	0	0
07/02/2004 17:00:00	0	0	0	0	0	0	0	0	0	0	0	0	0
07/02/2004 18:00:00	0	0	0	0	0	0	0	0	0	0	0	0	0
07/02/2004 19:00:00	0	0	0	0	0	0	0	0	0	0	0	0	0
07/02/2004 20:00:00	0	0	0	0	0	0	0	0	0	0	0	0	0
07/02/2004 21:00:00	0	0	0	0	0	0	0	0	0	0	0	0	0
07/02/2004 22:00:00	0	0	0	0	0	0	0	0	0	0	0	0	0
07/02/2004 23:00:00	0	0	0	0	0	0	0	0	0	0	0	0	0
08/02/2004 00:00:00	0	0	0	0	0	0	0	0	0	0	0	0	0
08/02/2004 01:00:00	0	0	0	0	0	0	0	0	0	0	0	0	0
08/02/2004 02:00:00	0	0	0	0	0	0	0	0	0	0	0	0	0
08/02/2004 03:00:00	0	0	0	0	0	0	0	0	0	0	0	0	0
08/02/2004 04:00:00	0	0	0	0	0	0	0	0	0	0	0	0	0
08/02/2004 05:00:00	0	0	0	0	0	0	0	0	0	0	0	0	0
08/02/2004 06:00:00	0	0	0	0	0	0	0	0	0	0	0	0	0
08/02/2004 07:00:00	0	0	0	0	0	0	0	0	0	0	0	0	0
08/02/2004 08:00:00	0	0	0	0	0	0	0	0	0	0	0	0	0
08/02/2004 09:00:00	0	0	0	0	0	0	0	0	0	0	0	0	0
08/02/2004 10:00:00	0	0	0	0	0	0	0	0	0	0	0	0	0
08/02/2004 11:00:00	0	0	0	0	0	0	0	0	0	0	0	0	0
08/02/2004 12:00:00	0	0	0	0	0	0	0	0	0	0	0	0	0
08/02/2004 13:00:00	0	0	0	0	0	0	0	0	0	0	0	0	0
08/02/2004 14:00:00	0	0	0	0	0	0	0	0	0	0	0	0	0
08/02/2004 15:00:00	0	0	0	0	0	0	0	0	0	0	0	0	0
08/02/2004 16:00:00	0	0	0	0	0	0	0	0	0	0	0	0	0
08/02/2004 17:00:00	0	0	0	0	0	0	0	0	0	0	0	0	0
08/02/2004 18:00:00	0	0	0	0	0	0	0	0	0	0	0	0	0
08/02/2004 19:00:00	0	0	0	0	0	0	0	0	0	0	0	0	0
08/02/2004 20:00:00	0	0	0	0	0	0	0	0	0	0	0	0	0
08/02/2004 21:00:00	0	0	0	0	0	0	0	0	0	0	0	0	0
08/02/2004 22:00:00	0	0	0	0	0	0	0	0	0	0	0	0	0
08/02/2004 23:00:00	0	0	0	0	0	0	0	0	0	0	0	0	0
09/02/2004 00:00:00	0	0	0	0	0	0	0	0	0	0	0	0	0
09/02/2004 01:00:00	0	0	0	0	0	0	0	0	0	0	0	0	0
09/02/2004 02:00:00	0	0	0	0	0	0	0	0	0	0	0	0	0
09/02/2004 03:00:00	0	0	0	0	0	0	0	0	0	0	0	0	0
09/02/2004 04:00:00	0	0	0	0	0	0	0	0	0	0	0	0	0
09/02/2004 05:00:00	0	0	0	0	0	0	0	0	0	0	0	0	0
09/02/2004 06:00:00	0	0	0	0	0	0	0	0	0	0	0	0	0
09/02/2004 07:00:00	0	0	0	0	0	0	0	0	0	0	0	0	0
09/02/2004 08:00:00	0	0	0	0	0	0	0	0	0	0	0	0	0
09/02/2004 09:00:00	0	0	0	0	0	0	0	0	0	0	0	0	0
09/02/2004 10:00:00	0	0	0	0	0	0	0	0	0	0	0	0	0
09/02/2004 11:00:00	0	0	0	0	0	0	0	0	0	0	0	0	0
09/02/2004 12:00:00	0	0	0	0	0	0	0	0	0	0	0	0	0
09/02/2004 13:00:00	0	0	0	0	0	0	0	0	0	0	0	0	0
09/02/2004 14:00:00	0	0	0	0	0	0	0	0	0	0	0	0	0
09/02/2004 15:00:00	0	0	0	0	0	0	0	0	0	0	0	0	0
09/02/2004 16:00:00	0	0	0	0	0	0	0	0	0	0	0	0	0
09/02/2004 17:00:00	0	0	0	0	0	0	0	0	0	0	0	0	0
09/02/2004 18:00:00	0	0	0	0	0	0	0	0	0	0	0	0	0
09/02/2004 19:00:00	0	0	0	0	0	0	0	0	0	0	0	0	0
09/02/2004 20:00:00	0	0	0	0	0	0	0	0	0	0	0	0	0
09/02/2004 21:00:00	0	0	0	0	0	0	0	0	0	0	0	0	0
09/02/2004 22:00:00	0	0	0	0	0	0	0	0	0	0	0	0	0
09/02/2004 23:00:00	0	0	0	0	0	0	0	0	0	0	0	0	0
10/02/2004 00:00:00	0	0	0	0	0	0	0	0	0	0	0	0	0
10/02/2004 01:00:00	0	0	0	0	0	0	0	0	0	0	0	0	0
10/02/2004 02:00:00	0	0	0	0	0	0	0	0	0	0	0	0	0
10/02/2004 03:00:00	0	0	0	0	0	0	0	0	0	0	0	0	0
10/02/2004 04:00:00	0	0	0	0	0	0	0	0	0	0	0	0	0
10/02/2004 05:00:00	0	0	0	0	0	0	0	0	0	0	0	0	0
10/02/2004 06:00:00	0	0	0	0	0	0	0	0	0	0	0	0	0
10/02/2004 07:00:00	0	0	0	0	0	0	0	0	0	0	0	0	0
10/02/2004 08:00:00	0	0	0	0	0	0	0	0	0	0	0	0	0
10/02/2004 09:00:00	0	0	0	0	0	0	0	0	0	0	0	0	0
10/02/2004 10:00:00	0	0	0	0	0	0	0	0	0	0	0	0	0
10/02/2004 11:00:00	0	0	0	0	0	0	0	0	0	0	0	0	0
10/02/2004 12:00:00	0	0	0	0	0	0	0	0	0	0	0	0	0
10/02/2004 13:00:00	0	0	0	0	0	0	0	0	0	0	0	0	0
10/02/2004 14:00:00	0	0	0	0	0	0	0	0	0	0	0	0	0
10/02/2004 15:00:00	0	0	0	0	0	0	0	0	0	0	0	0	0
10/02/2004 16:00:00	0	0	0	0	0	0	0	0	0	0	0	0	0
10/02/2004 17:00:00	0	0	0	0	0	0	0	0	0	0	0	0	0
10/02/2004 18:00:00	0	0	0	0	0	0	0	0	0	0	0	0	0
10/02/2004 19:00:00	0	0	0	0	0	0	0	0	0	0	0	0	0
10/02/2004 20:00:00	0	0	0	0	0	0	0	0	0	0	0	0	0
10/02/2004 21:00:00	0	0	0	0	0	0	0	0	0	0	0	0	0
10/02/2004 22:00:00	0	0	0	0	0	0	0	0	0	0	0	0	0
10/02/2004 23:00:00	0	0	0	0	0	0	0	0	0	0	0	0	0
11/02/2004 00:00:00	0	0	0	0	0	0	0	0	0	0	0	0	0
11/02/2004 01:00:00	0	0	0	0	0	0	0	0	0	0	0	0	0
11/02/2004 02:00:00	0	0	0	0	0	0	0	0	0	0	0	0	0
11/02/2004 03:00:00	0	0	0	0	0	0	0	0	0	0	0	0	0
11/02/2004 04:00:00	0	0	0	0	0	0	0	0	0	0	0	0	0
11/02/2004 05:00:00	0	0	0	0	0	0	0	0	0	0	0	0	0
11/02/2004 06:00:00	0	0	0	0	0	0	0	0	0	0	0	0	0
11/02/2004 07:00:00	0	0	0	0	0	0	0	0	0	0	0	0	0
11/02/2004 08:00:00	0	0	0	0	0	0	0	0	0	0	0	0	0
11/02/2004 09:00:00	0	0	0	0	0	0	0	0	0	0	0	0	0
11/02/2004 10:00:00	0	0	0	0	0	0	0	0	0	0	0	0	0
11/02/2004 11:00:00	0	0	0	0	0	0	0	0	0	0	0	0	0
11/02/2004 12:00:00	0	0	0	0	0	0	0	0	0	0	0	0	0
11/02/2004 13:00:00	0	0	0	0	0	0	0	0	0	0	0	0	0
11/02/2004 14:00:00	0	0	0	0	0	0	0	0	0	0	0	0	0
11/02/2004 15:00:00	0	0	0	0	0	0	0	0	0	0	0	0	0
11/02/2004 16:00:00	0	0	0	0	0	0	0	0	0	0	0	0	0
11/02/2004 17:00:00	0	0	0	0	0	0	0	0	0	0	0	0	0
11/02/2004 18:00:00	0	0	0	0	0	0	0	0	0	0	0	0	0
11/02/2004 19:00:00	0	0	0	0	0	0	0	0	0	0	0	0	0
11/02/2004 20:00:00	0	0	0	0	0	0	0	0	0	0	0	0	0
11/02/2004 21:00:00	0	0	0	0	0	0	0	0	0	0	0	0	0
11/02/2004 22:00:00	0	0	0	0	0	0	0	0	0	0	0	0	0
11/02/2004 23:00:00	0	0	0	0	0	0	0	0	0	0	0	0	0
12/02/2004 00:00:00	0	0	0	0	0	0	0	0	0	0	0	0	0
12/02/2004 01:00:00	0	0	0	0	0	0	0	0	0	0	0	0	0
12/02/2004 02:00:00	0	0	0	0	0	0	0	0	0	0	0	0	0
12/02/2004 03:00:00	0	0	0	0	0	0	0	0	0	0	0	0	0
12/02/2004 04:00:00	0	0	0	0	0	0	0	0	0	0	0	0	0
12/02/2004 05:00:00	0	0	0	0	0	0	0	0	0	0	0	0	0
12/02/2004 06:00:00	0	0	0	0	0	0	0	0	0	0	0	0	0
12/02/2004 07:00:00	0	0	0	0	0	0	0	0	0	0	0	0	0
12/02/2004 08:00:00	0	0	0	0	0	0	0	0	0	0	0	0	0
12/02/2004 09:00:00	0	0	0	0	0	0	0	0	0	0	0	0	0
12/02/2004 10:00:00	0	0	0	0	0	0	0	0	0	0	0	0	0
12/02/2004 11:00:00	0	0	0	0	0	0	0	0	0	0	0	0	0
12/02/2004 12:00:00	0	0	0	0	0	0	0	0	0	0	0	0	0
12/02/2004 13:00:00	0	0	0	0	0	0	0	0	0	0	0	0	0
12/02/2004 14:00:00	0	0	0	0	0	0	0	0	0	0	0	0	0
12/02/2004 15:00:00	0	0	0	0	0	0	0	0	0	0	0	0	0
12/02/2004 16:00:00	0	0	0	0	0	0	0	0	0	0	0	0	0
12/02/2004 17:00:00	0	0	0	0	0	0	0	0	0	0	0	0	0
12/02/2004 18:00:00	0	0	0	0	0	0	0	0	0	0	0	0	0
12/02/2004 19:00:00	0	0	0	0	0	0	0	0	0	0	0	0	0
12/02/2004 20:00:00	0	0	0	0	0	0	0	0	0	0	0	0	0
12/02/2004 21:00:00	0	0	0	0	0	0	0	0	0	0	0	0	0
12/02/2004 22:00:00	0	0	0	0	0	0	0	0	0	0	0	0	0
12/02/2004 23:00:00	0	0	0	0	0	0	0	0	0	0	0	0	0
13/02/2004 00:00:00	0	0	0	0	0	0	0	0	0	0	0	0	0
13/02/2004 01:00:00	0	0	0	0	0	0	0	0	0	0	0	0	0
13/02/2004 02:00:00	0	0	0	0	0	0	0	0	0	0	0	0	0
13/02/2004 03:00:00	0	0	0	0	0	0	0	0	0	0	0	0	0
13/02/2004 04:00:00	0	0	0	0	0	0	0	0	0	0	0	0	0
13/02/2004 05:00:00	0	0	0	0	0	0	0	0	0	0	0	0	0
13/02/2004 06:00:00	0	0	0	0	0	0	0	0	0	0	0	0	0
13/02/2004 07:00:00	0	0	0	0	0	0	0	0	0	0	0	0	0
13/02/2004 08:00:00	0	0	0	0	0	0	0	0	0	0	0	0	0
13/02/2004 09:00:00	0	0	0	0	0	0	0	0	0	0	0	0	0
13/02/2004 10:00:00	0	0	0	0	0	0	0	0	0	0	0	0	0
13/02/2004 11:00:00	0	0	0	0	0	0	0	0	0	0	0	0	0
13/02/2004 12:00:00	0	0	0	0	0	0	0	0	0	0	0	0	0
13/02/2004 13:00:00	0	0	0	0	0	0	0	0	0	0	0	0	0
13/02/2004 14:00:00	0	0	0	0	0	0	0	0	0	0	0	0	0
13/02/2004 15:00:00	0	0	0	0	0	0	0	0	0	0	0	0	0
13/02/2004 16:00:00	0	0	0	0	0	0	0	0	0	0	0	0	0
13/02/2004 17:00:00	0	0	0	0	0	0	0	0	0	0	0	0	0
13/02/2004 18:00:00	0	0	0	0	0	0	0	0	0	0	0	0	0
13/02/2004 19:00:00	0	0	0	0	0	0	0	0	0	0	0	0	0
13/02/2004 20:00:00	0	0	0	0	0	0	0	0	0	0	0	0	0
13/02/2004 21:00:00	0	0	0	0	0	0	0	0	0	0	0	0	0
13/02/2004 22:00:00	0	0	0	0	0	0	0	0	0	0	0	0	0
13/02/2004 23:00:00	0	0	0	0	0	0	0	0	0	0	0	0	0
14/02/2004 00:00:00	0	0	0	0	0	0	0	0	0	0	0	0	0
14/02/2004 01:00:00	0	0	0	0	0	0	0	0	0	0	0	0	0
14/02/2004 02:00:00	0	0	0	0	0	0	0	0	0	0	0	0	0
14/02/2004 03:00:00	0	0	0	0	0	0	0	0	0	0	0	0	0
14/02/2004 04:00:00	0	0	0	0	0	0	0	0	0	0	0	0	0
14/02/2004 05:00:00	0	0	0	0	0	0	0	0	0	0	0	0	0
14/02/2004 06:00:00	0	0	0	0	0	0	0	0	0	0	0	0	0
14/02/2004 07:00:00	0	0	0	0	0	0	0	0	0	0	0	0	0
14/02/2004 08:00:00	0	0	0	0	0	0	0	0	0	0	0	0	0
14/02/2004 09:00:00	0	0	0	0	0	0	0	0	0	0	0	0	0
14/02/2004 10:00:00	0	0	0	0	0	0	0	0	0	0	0	0	0
14/02/2004 11:00:00	0	0	0	0	0	0	0	0	0	0	0	0	0
14/02/2004 12:00:00	0	0	0	0	0	0	0	0	0	0	0	0	0
14/02/2004 13:00:00	0	0	0	0	0	0	0	0	0	0	0	0	0
14/02/2004 14:00:00	0	0	0	0	0	0	0	0	0	0	0	0	0
14/02/2004 15:00:00	0	0	0	0	0	0	0	0	0	0	0	0	0
14/02/2004 16:00:00	0	0	0	0	0	0	0	0	0	0	0	0	0
14/02/2004 17:00:00	0	0	0	0	0	0	0	0	0	0	0	0	0
14/02/2004 18:00:00	0	0	0	0	0	0	0	0	0	0	0	0	0
14/02/2004 19:00:00	0	0	0	0	0	0	0	0	0	0	0	0	0
14/02/2004 20:00:00	0	0	0	0	0	0	0	0	0	0	0	0	0
14/02/2004 21:00:00	0	0	0	0	0	0	0	0	0	0	0	0	0
14/02/2004 22:00:00	0	0	0	0	0	0	0	0	0	0	0	0	0
14/02/2004 23:00:00	0	0	0	0	0	0	0	0	0	0	0	0	0
15/02/2004 00:00:00	0	0	0	0	0	0	0	0	0	0	0	0	0
15/02/2004 01:00:00	0	0	0	0	0	0	0	0	0	0	0	0	0
15/02/2004 02:00:00	0	0	0	0	0	0	0	0	0	0	0	0	0
15/02/2004 03:00:00	0	0	0	0	0	0	0	0	0	0	0	0	0
15/02/2004 04:00:00	0	0	0	0	0	0	0	0	0	0	0	0	0
15/02/2004 05:00:00	0	0	0	0	0	0	0	0	0	0	0	0	0
15/02/2004 06:00:00	0	0	0	0	0	0	0	0	0	0	0	0	0
15/02/2004 07:00:00	0	0	0	0	0	0	0	0	0	0	0	0	0
15/02/2004 08:00:00	0	0	0	0	0	0	0	0	0	0	0	0	0
15/02/2004 09:00:00	0	0	0	0	0	0	0	0	0	0	0	0	0
15/02/2004 10:00:00	0	0	0	0	0	0	0	0	0	0	0	0	0
15/02/2004 11:00:00	0	0	0	0	0	0	0	0	0	0	0	0	0
15/02/2004 12:00:00	0	0	0	0	0	0	0	0	0	0	0	0	0
15/02/2004 13:00:00	0	0	0	0	0	0	0	0	0	0	0	0	0
15/02/2004 14:00:00	0	0	0	0	0	0	0	0	0	0	0	0	0
15/02/2004 15:00:00	0	0	0	0	0	0	0	0	0	0	0	0	0
15/02/2004 16:00:00	0	0	0	0	0	0	0	0	0	0	0	0	0
15/02/2004 17:00:00	0	0	0	0	0	0	0	0	0	0	0	0	0
15/02/2004 18:00:00	0	0	0	0	0	0	0	0	0	0	0	0	0
15/02/2004 19:00:00	0	0	0	0	0	0	0	0	0	0	0	0	0
15/02/2004 20:00:00	0	0	0	0	0	0	0	0	0	0	0	0	0
15/02/2004 21:00:00	0	0	0	0	0	0	0	0	0	0	0	0	0
15/02/2004 22:00:00	0	0	0	0	0	0	0	0	0	0	0	0	0
15/02/2004 23:00:00	0	0	0	0	0	0	0	0	0	0	0	0	0
16/02/2004 00:00:00	0	0	0	0	0	0	0	0.016666667	0	0	0.025	0.008333333	0.041666667
16/02/2004 01:00:00	0	0	0	0	0	0	0	0.016666667	0	0	0.025	0.008333333	0.041666667
16/02/2004 02:00:00	0	0	0	0	0	0	0	0.016666667	0	0	0.025	0.008333333	0.041666667
16/02/2004 03:00:00	0	0	0	0	0	0	0	0.016666667	0	0	0.025	0.008333333	0.041666667
16/02/2004 04:00:00	0	0	0	0	0	0	0	0.016666667	0	0	0.025	0.008333333	0.041666667
16/02/2004 05:00:00	0	0	0	0	0	0	0	0.016666667	0	0	0.025	0.008333333	0.041666667
16/02/2004 06:00:00	0	0	0	0	0	0	0	0.016666667	0	0	0.025	0.008333333	0.041666667
16/02/2004 07:00:00	0	0	0	0	0	0	0	0.016666667	0	0	0.025	0.008333333	0.041666667
16/02/2004 08:00:00	0	0	0	0	0	0	0	0.016666667	0	0	0.025	0.008333333	0.041666667
16/02/2004 09:00:00	0	0	0	0	0	0	0	0.016666667	0	0	0.025	0.008333333	0.041666667
16/02/2004 10:00:00	0	0	0	0	0	0	0	0.016666667	0	0	0.025	0.008333333	0.041666667
16/02/2004 11:00:00	0	0	0	0	0	0	0	0.016666667	0	0	0.025	0.008333333	0.041666667
16/02/2004 12:00:00	0	0	0	0	0	0	0	0.016666667	0	0	0.025	0.008333333	0.041666667
16/02/2004 13:00:00	0	0	0	0	0	0	0	0.016666667	0	0	0.025	0.008333333	0.041666667
16/02/2004 14:00:00	0	0	0	0	0	0	0	0.016666667	0	0	0.025	0.008333333	0.041666667
16/02/2004 15:00:00	0	0	0	0	0	0	0	0.016666667	0	0	0.025	0.008333333	0.041666667
16/02/2004 16:00:00	0	0	0	0	0	0	0	0.016666667	0	0	0.025	0.008333333	0.041666667
16/02/2004 17:00:00	0	0	0	0	0	0	0	0.016666667	0	0	0.025	0.008333333	0.041666667
16/02/2004 18:00:00	0	0	0	0	0	0	0	0.016666667	0	0	0.025	0.008333333	0.041666667
16/02/2004 19:00:00	0	0	0	0	0	0	0	0.016666667	0	0	0.025	0.008333333	0.041666667
16/02/2004 20:00:00	0	0	0	0	0	0	0	0.016666667	0	0	0.025	0.008333333	0.041666667
16/02/2004 21:00:00	0	0	0	0	0	0	0	0.016666667	0	0	0.025	0.008333333	0.041666667
16/02/2004 22:00:00	0	0	0	0	0	0	0	0.016666667	0	0	0.025	0.008333333	0.041666667
16/02/2004 23:00:00	0	0	0	0	0	0	0	0.016666667	0	0	0.025	0.008333333	0.041666667
17/02/2004 00:00:00	0	0	0	0	0	0	0	0	0	0	0	0	0
17/02/2004 01:00:00	0	0	0	0	0	0	0	0	0	0	0	0	0
17/02/2004 02:00:00	0	0	0	0	0	0	0	0	0	0	0	0	0
17/02/2004 03:00:00	0	0	0	0	0	0	0	0	0	0	0	0	0
17/02/2004 04:00:00	0	0	0	0	0	0	0	0	0	0	0	0	0
17/02/2004 05:00:00	0	0	0	0	0	0	0	0	0	0	0	0	0
17/02/2004 06:00:00	0	0	0	0	0	0	0	0	0	0	0	0	0
17/02/2004 07:00:00	0	0	0	0	0	0	0	0	0	0	0	0	0
17/02/2004 08:00:00	0	0	0	0	0	0	0	0	0	0	0	0	0
17/02/2004 09:00:00	0	0	0	0	0	0	0	0	0	0	0	0	0
17/02/2004 10:00:00	0	0	0	0	0	0	0	0	0	0	0	0	0
17/02/2004 11:00:00	0	0	0	0	0	0	0	0	0	0	0	0	0
17/02/2004 12:00:00	0	0	0	0	0	0	0	0	0	0	0	0	0
17/02/2004 13:00:00	0	0	0	0	0	0	0	0	0	0	0	0	0
17/02/2004 14:00:00	0	0	0	0	0	0	0	0	0	0	0	0	0
17/02/2004 15:00:00	0	0	0	0	0	0	0	0	0	0	0	0	0
17/02/2004 16:00:00	0	0	0	0	0	0	0	0	0	0	0	0	0
17/02/2004 17:00:00	0	0	0	0	0	0	0	0	0	0	0	0	0
17/02/2004 18:00:00	0	0	0	0	0	0	0	0	0	0	0	0	0
17/02/2004 19:00:00	0	0	0	0	0	0	0	0	0	0	0	0	0
17/02/2004 20:00:00	0	0	0	0	0	0	0	0	0	0	0	0	0
17/02/2004 21:00:00	0	0	0	0	0	0	0	0	0	0	0	0	0
17/02/2004 22:00:00	0	0	0	0	0	0	0	0	0	0	0	0	0
17/02/2004 23:00:00	0	0	0	0	0	0	0	0	0	0	0	0	0
18/02/2004 00:00:00	0	0	0	0	0	0	0	0	0	0	0	0	0
18/02/2004 01:00:00	0	0	0	0	0	0	0	0	0	0	0	0	0
18/02/2004 02:00:00	0	0	0	0	0	0	0	0	0	0	0	0	0
18/02/2004 03:00:00	0	0	0	0	0	0	0	0	0	0	0	0	0
18/02/2004 04:00:00	0	0	0	0	0	0	0	0	0	0	0	0	0
18/02/2004 05:00:00	0	0	0	0	0	0	0	0	0	0	0	0	0
18/02/2004 06:00:00	0	0	0	0	0	0	0	0	0	0	0	0	0
18/02/2004 07:00:00	0	0	0	0	0	0	0	0	0	0	0	0	0
18/02/2004 08:00:00	0	0	0	0	0	0	0	0	0	0	0	0	0
18/02/2004 09:00:00	0	0	0	0	0	0	0	0	0	0	0	0	0
18/02/2004 10:00:00	0	0	0	0	0	0	0	0	0	0	0	0	0
18/02/2004 11:00:00	0	0	0	0	0	0	0	0	0	0	0	0	0
18/02/2004 12:00:00	0	0	0	0	0	0	0	0	0	0	0	0	0
18/02/2004 13:00:00	0	0	0	0	0	0	0	0	0	0	0	0	0
18/02/2004 14:00:00	0	0	0	0	0	0	0	0	0	0	0	0	0
18/02/2004 15:00:00	0	0	0	0	0	0	0	0	0	0	0	0	0
18/02/2004 16:00:00	0	0	0	0	0	0	0	0	0	0	0	0	0
18/02/2004 17:00:00	0	0	0	0	0	0	0	0	0	0	0	0	0
18/02/2004 18:00:00	0	0	0	0	0	0	0	0	0	0	0	0	0
18/02/2004 19:00:00	0	0	0	0	0	0	0	0	0	0	0	0	0
18/02/2004 20:00:00	0	0	0	0	0	0	0	0	0	0	0	0	0
18/02/2004 21:00:00	0	0	0	0	0	0	0	0	0	0	0	0	0
18/02/2004 22:00:00	0	0	0	0	0	0	0	0	0	0	0	0	0
18/02/2004 23:00:00	0	0	0	0	0	0	0	0	0	0	0	0	0
19/02/2004 00:00:00	0	0	0	0	0	0	0	0	0	0	0	0	0
19/02/2004 01:00:00	0	0	0	0	0	0	0	0	0	0	0	0	0
19/02/2004 02:00:00	0	0	0	0	0	0	0	0	0	0	0	0	0
19/02/2004 03:00:00	0	0	0	0	0	0	0	0	0	0	0	0	0
19/02/2004 04:00:00	0	0	0	0	0	0	0	0	0	0	0	0	0
19/02/2004 05:00:00	0	0	0	0	0	0	0	0	0	0	0	0	0
19/02/2004 06:00:00	0	0	0	0	0	0	0	0	0	0	0	0	0
19/02/2004 07:00:00	0	0	0	0	0	0	0	0	0	0	0	0	0
19/02/2004 08:00:00	0	0	0	0	0	0	0	0	0	0	0	0	0
19/02/2004 09:00:00	0	0	0	0	0	0	0	0	0	0	0	0	0
19/02/2004 10:00:00	0	0	0	0	0	0	0	0	0	0	0	0	0
19/02/2004 11:00:00	0	0	0	0	0	0	0	0	0	0	0	0	0
19/02/2004 12:00:00	0	0	0	0	0	0	0	0	0	0	0	0	0
19/02/2004 13:00:00	0	0	0	0	0	0	0	0	0	0	0	0	0
19/02/2004 14:00:00	0	0	0	0	0	0	0	0	0	0	0	0	0
19/02/2004 15:00:00	0	0	0	0	0	0	0	0	0	0	0	0	0
19/02/2004 16:00:00	0	0	0	0	0	0	0	0	0	0	0	0	0
19/02/2004 17:00:00	0	0	0	0	0	0	0	0	0	0	0	0	0
19/02/2004 18:00:00	0	0	0	0	0	0	0	0	0	0	0	0	0
19/02/2004 19:00:00	0	0	0	0	0	0	0	0	0	0	0	0	0
19/02/2004 20:00:00	0	0	0	0	0	0	0	0	0	0	0	0	0
19/02/2004 21:00:00	0	0	0	0	0	0	0	0	0	0	0	0	0
19/02/2004 22:00:00	0	0	0	0	0	0	0	0	0	0	0	0	0
19/02/2004 23:00:00	0	0	0	0	0	0	0	0	0	0	0	0	0
20/02/2004 00:00:00	1.575	0.683333333	0.791666667	0.916666667	0.75	1.479166667	0.9125	1.658333333	1.208333333	1.2375	1.454166667	1.570833333	0.6
20/02/2004 01:00:00	1.575	0.683333333	0.791666667	0.916666667	0.75	1.479166667	0.9125	1.658333333	1.208333333	1.2375	1.454166667	1.570833333	0.6
20/02/2004 02:00:00	1.575	0.683333333	0.791666667	0.916666667	0.75	1.479166667	0.9125	1.658333333	1.208333333	1.2375	1.454166667	1.570833333	0.6
20/02/2004 03:00:00	1.575	0.683333333	0.791666667	0.916666667	0.75	1.479166667	0.9125	1.658333333	1.208333333	1.2375	1.454166667	1.570833333	0.6
20/02/2004 04:00:00	1.575	0.683333333	0.791666667	0.916666667	0.75	1.479166667	0.9125	1.658333333	1.208333333	1.2375	1.454166667	1.570833333	0.6
20/02/2004 05:00:00	1.575	0.683333333	0.791666667	0.916666667	0.75	1.479166667	0.9125	1.658333333	1.208333333	1.2375	1.454166667	1.570833333	0.6
20/02/2004 06:00:00	1.575	0.683333333	0.791666667	0.916666667	0.75	1.479166667	0.9125	1.658333333	1.208333333	1.2375	1.454166667	1.570833333	0.6
20/02/2004 07:00:00	1.575	0.683333333	0.791666667	0.916666667	0.75	1.479166667	0.9125	1.658333333	1.208333333	1.2375	1.454166667	1.570833333	0.6
20/02/2004 08:00:00	1.575	0.683333333	0.791666667	0.916666667	0.75	1.479166667	0.9125	1.658333333	1.208333333	1.2375	1.454166667	1.570833333	0.6
20/02/2004 09:00:00	1.575	0.683333333	0.791666667	0.916666667	0.75	1.479166667	0.9125	1.658333333	1.208333333	1.2375	1.454166667	1.570833333	0.6
20/02/2004 10:00:00	1.575	0.683333333	0.791666667	0.916666667	0.75	1.479166667	0.9125	1.658333333	1.208333333	1.2375	1.454166667	1.570833333	0.6
20/02/2004 11:00:00	1.575	0.683333333	0.791666667	0.916666667	0.75	1.479166667	0.9125	1.658333333	1.208333333	1.2375	1.454166667	1.570833333	0.6
20/02/2004 12:00:00	1.575	0.683333333	0.791666667	0.916666667	0.75	1.479166667	0.9125	1.658333333	1.208333333	1.2375	1.454166667	1.570833333	0.6
20/02/2004 13:00:00	1.575	0.683333333	0.791666667	0.916666667	0.75	1.479166667	0.9125	1.658333333	1.208333333	1.2375	1.454166667	1.570833333	0.6
20/02/2004 14:00:00	1.575	0.683333333	0.791666667	0.916666667	0.75	1.479166667	0.9125	1.658333333	1.208333333	1.2375	1.454166667	1.570833333	0.6
20/02/2004 15:00:00	1.575	0.683333333	0.791666667	0.916666667	0.75	1.479166667	0.9125	1.658333333	1.208333333	1.2375	1.454166667	1.570833333	0.6
20/02/2004 16:00:00	1.575	0.683333333	0.791666667	0.916666667	0.75	1.479166667	0.9125	1.658333333	1.208333333	1.2375	1.454166667	1.570833333	0.6
20/02/2004 17:00:00	1.575	0.683333333	0.791666667	0.916666667	0.75	1.479166667	0.9125	1.658333333	1.208333333	1.2375	1.454166667	1.570833333	0.6
20/02/2004 18:00:00	1.575	0.683333333	0.791666667	0.916666667	0.75	1.479166667	0.9125	1.658333333	1.208333333	1.2375	1.454166667	1.570833333	0.6
20/02/2004 19:00:00	1.575	0.683333333	0.791666667	0.916666667	0.75	1.479166667	0.9125	1.658333333	1.208333333	1.2375	1.454166667	1.570833333	0.6
20/02/2004 20:00:00	1.575	0.683333333	0.791666667	0.916666667	0.75	1.479166667	0.9125	1.658333333	1.208333333	1.2375	1.454166667	1.570833333	0.6
20/02/2004 21:00:00	1.575	0.683333333	0.791666667	0.916666667	0.75	1.479166667	0.9125	1.658333333	1.208333333	1.2375	1.454166667	1.570833333	0.6
20/02/2004 22:00:00	1.575	0.683333333	0.791666667	0.916666667	0.75	1.479166667	0.9125	1.658333333	1.208333333	1.2375	1.454166667	1.570833333	0.6
20/02/2004 23:00:00	1.575	0.683333333	0.791666667	0.916666667	0.75	1.479166667	0.9125	1.658333333	1.208333333	1.2375	1.454166667	1.570833333	0.6
21/02/2004 00:00:00	0	0	0.016666667	0	0.004166667	0	0.033333333	0.020833333	0.05	0.041666667	0	0	0.104166667
21/02/2004 01:00:00	0	0	0.016666667	0	0.004166667	0	0.033333333	0.020833333	0.05	0.041666667	0	0	0.104166667
21/02/2004 02:00:00	0	0	0.016666667	0	0.004166667	0	0.033333333	0.020833333	0.05	0.041666667	0	0	0.104166667
21/02/2004 03:00:00	0	0	0.016666667	0	0.004166667	0	0.033333333	0.020833333	0.05	0.041666667	0	0	0.104166667
21/02/2004 04:00:00	0	0	0.016666667	0	0.004166667	0	0.033333333	0.020833333	0.05	0.041666667	0	0	0.104166667
21/02/2004 05:00:00	0	0	0.016666667	0	0.004166667	0	0.033333333	0.020833333	0.05	0.041666667	0	0	0.104166667
21/02/2004 06:00:00	0	0	0.016666667	0	0.004166667	0	0.033333333	0.020833333	0.05	0.041666667	0	0	0.104166667
21/02/2004 07:00:00	0	0	0.016666667	0	0.004166667	0	0.033333333	0.020833333	0.05	0.041666667	0	0	0.104166667
21/02/2004 08:00:00	0	0	0.016666667	0	0.004166667	0	0.033333333	0.020833333	0.05	0.041666667	0	0	0.104166667
21/02/2004 09:00:00	0	0	0.016666667	0	0.004166667	0	0.033333333	0.020833333	0.05	0.041666667	0	0	0.104166667
21/02/2004 10:00:00	0	0	0.016666667	0	0.004166667	0	0.033333333	0.020833333	0.05	0.041666667	0	0	0.104166667
21/02/2004 11:00:00	0	0	0.016666667	0	0.004166667	0	0.033333333	0.020833333	0.05	0.041666667	0	0	0.104166667
21/02/2004 12:00:00	0	0	0.016666667	0	0.004166667	0	0.033333333	0.020833333	0.05	0.041666667	0	0	0.104166667
21/02/2004 13:00:00	0	0	0.016666667	0	0.004166667	0	0.033333333	0.020833333	0.05	0.041666667	0	0	0.104166667
21/02/2004 14:00:00	0	0	0.016666667	0	0.004166667	0	0.033333333	0.020833333	0.05	0.041666667	0	0	0.104166667
21/02/2004 15:00:00	0	0	0.016666667	0	0.004166667	0	0.033333333	0.020833333	0.05	0.041666667	0	0	0.104166667
21/02/2004 16:00:00	0	0	0.016666667	0	0.004166667	0	0.033333333	0.020833333	0.05	0.041666667	0	0	0.104166667
21/02/2004 17:00:00	0	0	0.016666667	0	0.004166667	0	0.033333333	0.020833333	0.05	0.041666667	0	0	0.104166667
21/02/2004 18:00:00	0	0	0.016666667	0	0.004166667	0	0.033333333	0.020833333	0.05	0.041666667	0	0	0.104166667
21/02/2004 19:00:00	0	0	0.016666667	0	0.004166667	0	0.033333333	0.020833333	0.05	0.041666667	0	0	0.104166667
21/02/2004 20:00:00	0	0	0.016666667	0	0.004166667	0	0.033333333	0.020833333	0.05	0.041666667	0	0	0.104166667
21/02/2004 21:00:00	0	0	0.016666667	0	0.004166667	0	0.033333333	0.020833333	0.05	0.041666667	0	0	0.104166667
21/02/2004 22:00:00	0	0	0.016666667	0	0.004166667	0	0.033333333	0.020833333	0.05	0.041666667	0	0	0.104166667
21/02/2004 23:00:00	0	0	0.016666667	0	0.004166667	0	0.033333333	0.020833333	0.05	0.041666667	0	0	0.104166667
22/02/2004 00:00:00	0	0	0	0	0	0	0	0	0	0	0	0	0
22/02/2004 01:00:00	0	0	0	0	0	0	0	0	0	0	0	0	0
22/02/2004 02:00:00	0	0	0	0	0	0	0	0	0	0	0	0	0
22/02/2004 03:00:00	0	0	0	0	0	0	0	0	0	0	0	0	0
22/02/2004 04:00:00	0	0	0	0	0	0	0	0	0	0	0	0	0
22/02/2004 05:00:00	0	0	0	0	0	0	0	0	0	0	0	0	0
22/02/2004 06:00:00	0	0	0	0	0	0	0	0	0	0	0	0	0
22/02/2004 07:00:00	0	0	0	0	0	0	0	0	0	0	0	0	0
22/02/2004 08:00:00	0	0	0	0	0	0	0	0	0	0	0	0	0
22/02/2004 09:00:00	0	0	0	0	0	0	0	0	0	0	0	0	0
22/02/2004 10:00:00	0	0	0	0	0	0	0	0	0	0	0	0	0
22/02/2004 11:00:00	0	0	0	0	0	0	0	0	0	0	0	0	0
22/02/2004 12:00:00	0	0	0	0	0	0	0	0	0	0	0	0	0
22/02/2004 13:00:00	0	0	0	0	0	0	0	0	0	0	0	0	0
22/02/2004 14:00:00	0	0	0	0	0	0	0	0	0	0	0	0	0
22/02/2004 15:00:00	0	0	0	0	0	0	0	0	0	0	0	0	0
22/02/2004 16:00:00	0	0	0	0	0	0	0	0	0	0	0	0	0
22/02/2004 17:00:00	0	0	0	0	0	0	0	0	0	0	0	0	0
22/02/2004 18:00:00	0	0	0	0	0	0	0	0	0	0	0	0	0
22/02/2004 19:00:00	0	0	0	0	0	0	0	0	0	0	0	0	0
22/02/2004 20:00:00	0	0	0	0	0	0	0	0	0	0	0	0	0
22/02/2004 21:00:00	0	0	0	0	0	0	0	0	0	0	0	0	0
22/02/2004 22:00:00	0	0	0	0	0	0	0	0	0	0	0	0	0
22/02/2004 23:00:00	0	0	0	0	0	0	0	0	0	0	0	0	0
23/02/2004 00:00:00	0	0	0	0	0	0	0	0	0	0	0	0	0
23/02/2004 01:00:00	0	0	0	0	0	0	0	0	0	0	0	0	0
23/02/2004 02:00:00	0	0	0	0	0	0	0	0	0	0	0	0	0
23/02/2004 03:00:00	0	0	0	0	0	0	0	0	0	0	0	0	0
23/02/2004 04:00:00	0	0	0	0	0	0	0	0	0	0	0	0	0
23/02/2004 05:00:00	0	0	0	0	0	0	0	0	0	0	0	0	0
23/02/2004 06:00:00	0	0	0	0	0	0	0	0	0	0	0	0	0
23/02/2004 07:00:00	0	0	0	0	0	0	0	0	0	0	0	0	0
23/02/2004 08:00:00	0	0	0	0	0	0	0	0	0	0	0	0	0
23/02/2004 09:00:00	0	0	0	0	0	0	0	0	0	0	0	0	0
23/02/2004 10:00:00	0	0	0	0	0	0	0	0	0	0	0	0	0
23/02/2004 11:00:00	0	0	0	0	0	0	0	0	0	0	0	0	0
23/02/2004 12:00:00	0	0	0	0	0	0	0	0	0	0	0	0	0
23/02/2004 13:00:00	0	0	0	0	0	0	0	0	0	0	0	0	0
23/02/2004 14:00:00	0	0	0	0	0	0	0	0	0	0	0	0	0
23/02/2004 15:00:00	0	0	0	0	0	0	0	0	0	0	0	0	0
23/02/2004 16:00:00	0	0	0	0	0	0	0	0	0	0	0	0	0
23/02/2004 17:00:00	0	0	0	0	0	0	0	0	0	0	0	0	0
23/02/2004 18:00:00	0	0	0	0	0	0	0	0	0	0	0	0	0
23/02/2004 19:00:00	0	0	0	0	0	0	0	0	0	0	0	0	0
23/02/2004 20:00:00	0	0	0	0	0	0	0	0	0	0	0	0	0
23/02/2004 21:00:00	0	0	0	0	0	0	0	0	0	0	0	0	0
23/02/2004 22:00:00	0	0	0	0	0	0	0	0	0	0	0	0	0
23/02/2004 23:00:00	0	0	0	0	0	0	0	0	0	0	0	0	0
24/02/2004 00:00:00	0	0	0	0	0	0	0	0	0	0	0	0	0
24/02/2004 01:00:00	0	0	0	0	0	0	0	0	0	0	0	0	0
24/02/2004 02:00:00	0	0	0	0	0	0	0	0	0	0	0	0	0
24/02/2004 03:00:00	0	0	0	0	0	0	0	0	0	0	0	0	0
24/02/2004 04:00:00	0	0	0	0	0	0	0	0	0	0	0	0	0
24/02/2004 05:00:00	0	0	0	0	0	0	0	0	0	0	0	0	0
24/02/2004 06:00:00	0	0	0	0	0	0	0	0	0	0	0	0	0
24/02/2004 07:00:00	0	0	0	0	0	0	0	0	0	0	0	0	0
24/02/2004 08:00:00	0	0	0	0	0	0	0	0	0	0	0	0	0
24/02/2004 09:00:00	0	0	0	0	0	0	0	0	0	0	0	0	0
24/02/2004 10:00:00	0	0	0	0	0	0	0	0	0	0	0	0	0
24/02/2004 11:00:00	0	0	0	0	0	0	0	0	0	0	0	0	0
24/02/2004 12:00:00	0	0	0	0	0	0	0	0	0	0	0	0	0
24/02/2004 13:00:00	0	0	0	0	0	0	0	0	0	0	0	0	0
24/02/2004 14:00:00	0	0	0	0	0	0	0	0	0	0	0	0	0
24/02/2004 15:00:00	0	0	0	0	0	0	0	0	0	0	0	0	0
24/02/2004 16:00:00	0	0	0	0	0	0	0	0	0	0	0	0	0
24/02/2004 17:00:00	0	0	0	0	0	0	0	0	0	0	0	0	0
24/02/2004 18:00:00	0	0	0	0	0	0	0	0	0	0	0	0	0
24/02/2004 19:00:00	0	0	0	0	0	0	0	0	0	0	0	0	0
24/02/2004 20:00:00	0	0	0	0	0	0	0	0	0	0	0	0	0
24/02/2004 21:00:00	0	0	0	0	0	0	0	0	0	0	0	0	0
24/02/2004 22:00:00	0	0	0	0	0	0	0	0	0	0	0	0	0
24/02/2004 23:00:00	0	0	0	0	0	0	0	0	0	0	0	0	0
25/02/2004 00:00:00	0	0	0	0	0	0	0	0	0	0	0	0	0
25/02/2004 01:00:00	0	0	0	0	0	0	0	0	0	0	0	0	0
25/02/2004 02:00:00	0	0	0	0	0	0	0	0	0	0	0	0	0
25/02/2004 03:00:00	0	0	0	0	0	0	0	0	0	0	0	0	0
25/02/2004 04:00:00	0	0	0	0	0	0	0	0	0	0	0	0	0
25/02/2004 05:00:00	0	0	0	0	0	0	0	0	0	0	0	0	0
25/02/2004 06:00:00	0	0	0	0	0	0	0	0	0	0	0	0	0
25/02/2004 07:00:00	0	0	0	0	0	0	0	0	0	0	0	0	0
25/02/2004 08:00:00	0	0	0	0	0	0	0	0	0	0	0	0	0
25/02/2004 09:00:00	0	0	0	0	0	0	0	0	0	0	0	0	0
25/02/2004 10:00:00	0	0	0	0	0	0	0	0	0	0	0	0	0
25/02/2004 11:00:00	0	0	0	0	0	0	0	0	0	0	0	0	0
25/02/2004 12:00:00	0	0	0	0	0	0	0	0	0	0	0	0	0
25/02/2004 13:00:00	0	0	0	0	0	0	0	0	0	0	0	0	0
25/02/2004 14:00:00	0	0	0	0	0	0	0	0	0	0	0	0	0
25/02/2004 15:00:00	0	0	0	0	0	0	0	0	0	0	0	0	0
25/02/2004 16:00:00	0	0	0	0	0	0	0	0	0	0	0	0	0
25/02/2004 17:00:00	0	0	0	0	0	0	0	0	0	0	0	0	0
25/02/2004 18:00:00	0	0	0	0	0	0	0	0	0	0	0	0	0
25/02/2004 19:00:00	0	0	0	0	0	0	0	0	0	0	0	0	0
25/02/2004 20:00:00	0	0	0	0	0	0	0	0	0	0	0	0	0
25/02/2004 21:00:00	0	0	0	0	0	0	0	0	0	0	0	0	0
25/02/2004 22:00:00	0	0	0	0	0	0	0	0	0	0	0	0	0
25/02/2004 23:00:00	0	0	0	0	0	0	0	0	0	0	0	0	0
26/02/2004 00:00:00	0	0	0	0	0	0	0	0	0	0	0	0.008333333	0
26/02/2004 01:00:00	0	0	0	0	0	0	0	0	0	0	0	0.008333333	0
26/02/2004 02:00:00	0	0	0	0	0	0	0	0	0	0	0	0.008333333	0
26/02/2004 03:00:00	0	0	0	0	0	0	0	0	0	0	0	0.008333333	0
26/02/2004 04:00:00	0	0	0	0	0	0	0	0	0	0	0	0.008333333	0
26/02/2004 05:00:00	0	0	0	0	0	0	0	0	0	0	0	0.008333333	0
26/02/2004 06:00:00	0	0	0	0	0	0	0	0	0	0	0	0.008333333	0
26/02/2004 07:00:00	0	0	0	0	0	0	0	0	0	0	0	0.008333333	0
26/02/2004 08:00:00	0	0	0	0	0	0	0	0	0	0	0	0.008333333	0
26/02/2004 09:00:00	0	0	0	0	0	0	0	0	0	0	0	0.008333333	0
26/02/2004 10:00:00	0	0	0	0	0	0	0	0	0	0	0	0.008333333	0
26/02/2004 11:00:00	0	0	0	0	0	0	0	0	0	0	0	0.008333333	0
26/02/2004 12:00:00	0	0	0	0	0	0	0	0	0	0	0	0.008333333	0
26/02/2004 13:00:00	0	0	0	0	0	0	0	0	0	0	0	0.008333333	0
26/02/2004 14:00:00	0	0	0	0	0	0	0	0	0	0	0	0.008333333	0
26/02/2004 15:00:00	0	0	0	0	0	0	0	0	0	0	0	0.008333333	0
26/02/2004 16:00:00	0	0	0	0	0	0	0	0	0	0	0	0.008333333	0
26/02/2004 17:00:00	0	0	0	0	0	0	0	0	0	0	0	0.008333333	0
26/02/2004 18:00:00	0	0	0	0	0	0	0	0	0	0	0	0.008333333	0
26/02/2004 19:00:00	0	0	0	0	0	0	0	0	0	0	0	0.008333333	0
26/02/2004 20:00:00	0	0	0	0	0	0	0	0	0	0	0	0.008333333	0
26/02/2004 21:00:00	0	0	0	0	0	0	0	0	0	0	0	0.008333333	0
26/02/2004 22:00:00	0	0	0	0	0	0	0	0	0	0	0	0.008333333	0
26/02/2004 23:00:00	0	0	0	0	0	0	0	0	0	0	0	0.008333333	0
27/02/2004 00:00:00	0	0.004166667	0	0.0125	0.0125	0	0	0.020833333	0	0	0	0	0.004166667
27/02/2004 01:00:00	0	0.004166667	0	0.0125	0.0125	0	0	0.020833333	0	0	0	0	0.004166667
27/02/2004 02:00:00	0	0.004166667	0	0.0125	0.0125	0	0	0.020833333	0	0	0	0	0.004166667
27/02/2004 03:00:00	0	0.004166667	0	0.0125	0.0125	0	0	0.020833333	0	0	0	0	0.004166667
27/02/2004 04:00:00	0	0.004166667	0	0.0125	0.0125	0	0	0.020833333	0	0	0	0	0.004166667
27/02/2004 05:00:00	0	0.004166667	0	0.0125	0.0125	0	0	0.020833333	0	0	0	0	0.004166667
27/02/2004 06:00:00	0	0.004166667	0	0.0125	0.0125	0	0	0.020833333	0	0	0	0	0.004166667
27/02/2004 07:00:00	0	0.004166667	0	0.0125	0.0125	0	0	0.020833333	0	0	0	0	0.004166667
27/02/2004 08:00:00	0	0.004166667	0	0.0125	0.0125	0	0	0.020833333	0	0	0	0	0.004166667
27/02/2004 09:00:00	0	0.004166667	0	0.0125	0.0125	0	0	0.020833333	0	0	0	0	0.004166667
27/02/2004 10:00:00	0	0.004166667	0	0.0125	0.0125	0	0	0.020833333	0	0	0	0	0.004166667
27/02/2004 11:00:00	0	0.004166667	0	0.0125	0.0125	0	0	0.020833333	0	0	0	0	0.004166667
27/02/2004 12:00:00	0	0.004166667	0	0.0125	0.0125	0	0	0.020833333	0	0	0	0	0.004166667
27/02/2004 13:00:00	0	0.004166667	0	0.0125	0.0125	0	0	0.020833333	0	0	0	0	0.004166667
27/02/2004 14:00:00	0	0.004166667	0	0.0125	0.0125	0	0	0.020833333	0	0	0	0	0.004166667
27/02/2004 15:00:00	0	0.004166667	0	0.0125	0.0125	0	0	0.020833333	0	0	0	0	0.004166667
27/02/2004 16:00:00	0	0.004166667	0	0.0125	0.0125	0	0	0.020833333	0	0	0	0	0.004166667
27/02/2004 17:00:00	0	0.004166667	0	0.0125	0.0125	0	0	0.020833333	0	0	0	0	0.004166667
27/02/2004 18:00:00	0	0.004166667	0	0.0125	0.0125	0	0	0.020833333	0	0	0	0	0.004166667
27/02/2004 19:00:00	0	0.004166667	0	0.0125	0.0125	0	0	0.020833333	0	0	0	0	0.004166667
27/02/2004 20:00:00	0	0.004166667	0	0.0125	0.0125	0	0	0.020833333	0	0	0	0	0.004166667
27/02/2004 21:00:00	0	0.004166667	0	0.0125	0.0125	0	0	0.020833333	0	0	0	0	0.004166667
27/02/2004 22:00:00	0	0.004166667	0	0.0125	0.0125	0	0	0.020833333	0	0	0	0	0.004166667
27/02/2004 23:00:00	0	0.004166667	0	0.0125	0.0125	0	0	0.020833333	0	0	0	0	0.004166667
28/02/2004 00:00:00	0	0	0	0	0	0	0	0	0	0	0	0	0.025
28/02/2004 01:00:00	0	0	0	0	0	0	0	0	0	0	0	0	0.025
28/02/2004 02:00:00	0	0	0	0	0	0	0	0	0	0	0	0	0.025
28/02/2004 03:00:00	0	0	0	0	0	0	0	0	0	0	0	0	0.025
28/02/2004 04:00:00	0	0	0	0	0	0	0	0	0	0	0	0	0.025
28/02/2004 05:00:00	0	0	0	0	0	0	0	0	0	0	0	0	0.025
28/02/2004 06:00:00	0	0	0	0	0	0	0	0	0	0	0	0	0.025
28/02/2004 07:00:00	0	0	0	0	0	0	0	0	0	0	0	0	0.025
28/02/2004 08:00:00	0	0	0	0	0	0	0	0	0	0	0	0	0.025
28/02/2004 09:00:00	0	0	0	0	0	0	0	0	0	0	0	0	0.025
28/02/2004 10:00:00	0	0	0	0	0	0	0	0	0	0	0	0	0.025
28/02/2004 11:00:00	0	0	0	0	0	0	0	0	0	0	0	0	0.025
28/02/2004 12:00:00	0	0	0	0	0	0	0	0	0	0	0	0	0.025
28/02/2004 13:00:00	0	0	0	0	0	0	0	0	0	0	0	0	0.025
28/02/2004 14:00:00	0	0	0	0	0	0	0	0	0	0	0	0	0.025
28/02/2004 15:00:00	0	0	0	0	0	0	0	0	0	0	0	0	0.025
28/02/2004 16:00:00	0	0	0	0	0	0	0	0	0	0	0	0	0.025
28/02/2004 17:00:00	0	0	0	0	0	0	0	0	0	0	0	0	0.025
28/02/2004 18:00:00	0	0	0	0	0	0	0	0	0	0	0	0	0.025
28/02/2004 19:00:00	0	0	0	0	0	0	0	0	0	0	0	0	0.025
28/02/2004 20:00:00	0	0	0	0	0	0	0	0	0	0	0	0	0.025
28/02/2004 21:00:00	0	0	0	0	0	0	0	0	0	0	0	0	0.025
28/02/2004 22:00:00	0	0	0	0	0	0	0	0	0	0	0	0	0.025
28/02/2004 23:00:00	0	0	0	0	0	0	0	0	0	0	0	0	0.025
29/02/2004 00:00:00	0	0	0	0	0	0	0	0.0125	0	0	0.0625	0.020833333	0.195833333
29/02/2004 01:00:00	0	0	0	0	0	0	0	0.0125	0	0	0.0625	0.020833333	0.195833333
29/02/2004 02:00:00	0	0	0	0	0	0	0	0.0125	0	0	0.0625	0.020833333	0.195833333
29/02/2004 03:00:00	0	0	0	0	0	0	0	0.0125	0	0	0.0625	0.020833333	0.195833333
29/02/2004 04:00:00	0	0	0	0	0	0	0	0.0125	0	0	0.0625	0.020833333	0.195833333
29/02/2004 05:00:00	0	0	0	0	0	0	0	0.0125	0	0	0.0625	0.020833333	0.195833333
29/02/2004 06:00:00	0	0	0	0	0	0	0	0.0125	0	0	0.0625	0.020833333	0.195833333
29/02/2004 07:00:00	0	0	0	0	0	0	0	0.0125	0	0	0.0625	0.020833333	0.195833333
29/02/2004 08:00:00	0	0	0	0	0	0	0	0.0125	0	0	0.0625	0.020833333	0.195833333
29/02/2004 09:00:00	0	0	0	0	0	0	0	0.0125	0	0	0.0625	0.020833333	0.195833333
29/02/2004 10:00:00	0	0	0	0	0	0	0	0.0125	0	0	0.0625	0.020833333	0.195833333
29/02/2004 11:00:00	0	0	0	0	0	0	0	0.0125	0	0	0.0625	0.020833333	0.195833333
29/02/2004 12:00:00	0	0	0	0	0	0	0	0.0125	0	0	0.0625	0.020833333	0.195833333
29/02/2004 13:00:00	0	0	0	0	0	0	0	0.0125	0	0	0.0625	0.020833333	0.195833333
29/02/2004 14:00:00	0	0	0	0	0	0	0	0.0125	0	0	0.0625	0.020833333	0.195833333
29/02/2004 15:00:00	0	0	0	0	0	0	0	0.0125	0	0	0.0625	0.020833333	0.195833333
29/02/2004 16:00:00	0	0	0	0	0	0	0	0.0125	0	0	0.0625	0.020833333	0.195833333
29/02/2004 17:00:00	0	0	0	0	0	0	0	0.0125	0	0	0.0625	0.020833333	0.195833333
29/02/2004 18:00:00	0	0	0	0	0	0	0	0.0125	0	0	0.0625	0.020833333	0.195833333
29/02/2004 19:00:00	0	0	0	0	0	0	0	0.0125	0	0	0.0625	0.020833333	0.195833333
29/02/2004 20:00:00	0	0	0	0	0	0	0	0.0125	0	0	0.0625	0.020833333	0.195833333
29/02/2004 21:00:00	0	0	0	0	0	0	0	0.0125	0	0	0.0625	0.020833333	0.195833333
29/02/2004 22:00:00	0	0	0	0	0	0	0	0.0125	0	0	0.0625	0.020833333	0.195833333
29/02/2004 23:00:00	0	0	0	0	0	0	0	0.0125	0	0	0.0625	0.020833333	0.195833333
01/03/2004 00:00:00	0	0	0	0	0	0	0	0	0	0	0	0	0
01/03/2004 01:00:00	0	0	0	0	0	0	0	0	0	0	0	0	0
01/03/2004 02:00:00	0	0	0	0	0	0	0	0	0	0	0	0	0
01/03/2004 03:00:00	0	0	0	0	0	0	0	0	0	0	0	0	0
01/03/2004 04:00:00	0	0	0	0	0	0	0	0	0	0	0	0	0
01/03/2004 05:00:00	0	0	0	0	0	0	0	0	0	0	0	0	0
01/03/2004 06:00:00	0	0	0	0	0	0	0	0	0	0	0	0	0
01/03/2004 07:00:00	0	0	0	0	0	0	0	0	0	0	0	0	0
01/03/2004 08:00:00	0	0	0	0	0	0	0	0	0	0	0	0	0
01/03/2004 09:00:00	0	0	0	0	0	0	0	0	0	0	0	0	0
01/03/2004 10:00:00	0	0	0	0	0	0	0	0	0	0	0	0	0
01/03/2004 11:00:00	0	0	0	0	0	0	0	0	0	0	0	0	0
01/03/2004 12:00:00	0	0	0	0	0	0	0	0	0	0	0	0	0
01/03/2004 13:00:00	0	0	0	0	0	0	0	0	0	0	0	0	0
01/03/2004 14:00:00	0	0	0	0	0	0	0	0	0	0	0	0	0
01/03/2004 15:00:00	0	0	0	0	0	0	0	0	0	0	0	0	0
01/03/2004 16:00:00	0	0	0	0	0	0	0	0	0	0	0	0	0
01/03/2004 17:00:00	0	0	0	0	0	0	0	0	0	0	0	0	0
01/03/2004 18:00:00	0	0	0	0	0	0	0	0	0	0	0	0	0
01/03/2004 19:00:00	0	0	0	0	0	0	0	0	0	0	0	0	0
01/03/2004 20:00:00	0	0	0	0	0	0	0	0	0	0	0	0	0
01/03/2004 21:00:00	0	0	0	0	0	0	0	0	0	0	0	0	0
01/03/2004 22:00:00	0	0	0	0	0	0	0	0	0	0	0	0	0
01/03/2004 23:00:00	0	0	0	0	0	0	0	0	0	0	0	0	0
02/03/2004 00:00:00	0	0	0	0	0	0	0	0	0	0	0	0	0
02/03/2004 01:00:00	0	0	0	0	0	0	0	0	0	0	0	0	0
02/03/2004 02:00:00	0	0	0	0	0	0	0	0	0	0	0	0	0
02/03/2004 03:00:00	0	0	0	0	0	0	0	0	0	0	0	0	0
02/03/2004 04:00:00	0	0	0	0	0	0	0	0	0	0	0	0	0
02/03/2004 05:00:00	0	0	0	0	0	0	0	0	0	0	0	0	0
02/03/2004 06:00:00	0	0	0	0	0	0	0	0	0	0	0	0	0
02/03/2004 07:00:00	0	0	0	0	0	0	0	0	0	0	0	0	0
02/03/2004 08:00:00	0	0	0	0	0	0	0	0	0	0	0	0	0
02/03/2004 09:00:00	0	0	0	0	0	0	0	0	0	0	0	0	0
02/03/2004 10:00:00	0	0	0	0	0	0	0	0	0	0	0	0	0
02/03/2004 11:00:00	0	0	0	0	0	0	0	0	0	0	0	0	0
02/03/2004 12:00:00	0	0	0	0	0	0	0	0	0	0	0	0	0
02/03/2004 13:00:00	0	0	0	0	0	0	0	0	0	0	0	0	0
02/03/2004 14:00:00	0	0	0	0	0	0	0	0	0	0	0	0	0
02/03/2004 15:00:00	0	0	0	0	0	0	0	0	0	0	0	0	0
02/03/2004 16:00:00	0	0	0	0	0	0	0	0	0	0	0	0	0
02/03/2004 17:00:00	0	0	0	0	0	0	0	0	0	0	0	0	0
02/03/2004 18:00:00	0	0	0	0	0	0	0	0	0	0	0	0	0
02/03/2004 19:00:00	0	0	0	0	0	0	0	0	0	0	0	0	0
02/03/2004 20:00:00	0	0	0	0	0	0	0	0	0	0	0	0	0
02/03/2004 21:00:00	0	0	0	0	0	0	0	0	0	0	0	0	0
02/03/2004 22:00:00	0	0	0	0	0	0	0	0	0	0	0	0	0
02/03/2004 23:00:00	0	0	0	0	0	0	0	0	0	0	0	0	0
03/03/2004 00:00:00	0	0	0	0	0	0	0	0	0	0	0	0	0
03/03/2004 01:00:00	0	0	0	0	0	0	0	0	0	0	0	0	0
03/03/2004 02:00:00	0	0	0	0	0	0	0	0	0	0	0	0	0
03/03/2004 03:00:00	0	0	0	0	0	0	0	0	0	0	0	0	0
03/03/2004 04:00:00	0	0	0	0	0	0	0	0	0	0	0	0	0
03/03/2004 05:00:00	0	0	0	0	0	0	0	0	0	0	0	0	0
03/03/2004 06:00:00	0	0	0	0	0	0	0	0	0	0	0	0	0
03/03/2004 07:00:00	0	0	0	0	0	0	0	0	0	0	0	0	0
03/03/2004 08:00:00	0	0	0	0	0	0	0	0	0	0	0	0	0
03/03/2004 09:00:00	0	0	0	0	0	0	0	0	0	0	0	0	0
03/03/2004 10:00:00	0	0	0	0	0	0	0	0	0	0	0	0	0
03/03/2004 11:00:00	0	0	0	0	0	0	0	0	0	0	0	0	0
03/03/2004 12:00:00	0	0	0	0	0	0	0	0	0	0	0	0	0
03/03/2004 13:00:00	0	0	0	0	0	0	0	0	0	0	0	0	0
03/03/2004 14:00:00	0	0	0	0	0	0	0	0	0	0	0	0	0
03/03/2004 15:00:00	0	0	0	0	0	0	0	0	0	0	0	0	0
03/03/2004 16:00:00	0	0	0	0	0	0	0	0	0	0	0	0	0
03/03/2004 17:00:00	0	0	0	0	0	0	0	0	0	0	0	0	0
03/03/2004 18:00:00	0	0	0	0	0	0	0	0	0	0	0	0	0
03/03/2004 19:00:00	0	0	0	0	0	0	0	0	0	0	0	0	0
03/03/2004 20:00:00	0	0	0	0	0	0	0	0	0	0	0	0	0
03/03/2004 21:00:00	0	0	0	0	0	0	0	0	0	0	0	0	0
03/03/2004 22:00:00	0	0	0	0	0	0	0	0	0	0	0	0	0
03/03/2004 23:00:00	0	0	0	0	0	0	0	0	0	0	0	0	0
04/03/2004 00:00:00	0	0	0	0	0	0	0	0	0	0	0	0	0
04/03/2004 01:00:00	0	0	0	0	0	0	0	0	0	0	0	0	0
04/03/2004 02:00:00	0	0	0	0	0	0	0	0	0	0	0	0	0
04/03/2004 03:00:00	0	0	0	0	0	0	0	0	0	0	0	0	0
04/03/2004 04:00:00	0	0	0	0	0	0	0	0	0	0	0	0	0
04/03/2004 05:00:00	0	0	0	0	0	0	0	0	0	0	0	0	0
04/03/2004 06:00:00	0	0	0	0	0	0	0	0	0	0	0	0	0
04/03/2004 07:00:00	0	0	0	0	0	0	0	0	0	0	0	0	0
04/03/2004 08:00:00	0	0	0	0	0	0	0	0	0	0	0	0	0
04/03/2004 09:00:00	0	0	0	0	0	0	0	0	0	0	0	0	0
04/03/2004 10:00:00	0	0	0	0	0	0	0	0	0	0	0	0	0
04/03/2004 11:00:00	0	0	0	0	0	0	0	0	0	0	0	0	0
04/03/2004 12:00:00	0	0	0	0	0	0	0	0	0	0	0	0	0
04/03/2004 13:00:00	0	0	0	0	0	0	0	0	0	0	0	0	0
04/03/2004 14:00:00	0	0	0	0	0	0	0	0	0	0	0	0	0
04/03/2004 15:00:00	0	0	0	0	0	0	0	0	0	0	0	0	0
04/03/2004 16:00:00	0	0	0	0	0	0	0	0	0	0	0	0	0
04/03/2004 17:00:00	0	0	0	0	0	0	0	0	0	0	0	0	0
04/03/2004 18:00:00	0	0	0	0	0	0	0	0	0	0	0	0	0
04/03/2004 19:00:00	0	0	0	0	0	0	0	0	0	0	0	0	0
04/03/2004 20:00:00	0	0	0	0	0	0	0	0	0	0	0	0	0
04/03/2004 21:00:00	0	0	0	0	0	0	0	0	0	0	0	0	0
04/03/2004 22:00:00	0	0	0	0	0	0	0	0	0	0	0	0	0
04/03/2004 23:00:00	0	0	0	0	0	0	0	0	0	0	0	0	0
05/03/2004 00:00:00	0	0	0	0	0	0	0	0	0	0	0	0	0
05/03/2004 01:00:00	0	0	0	0	0	0	0	0	0	0	0	0	0
05/03/2004 02:00:00	0	0	0	0	0	0	0	0	0	0	0	0	0
05/03/2004 03:00:00	0	0	0	0	0	0	0	0	0	0	0	0	0
05/03/2004 04:00:00	0	0	0	0	0	0	0	0	0	0	0	0	0
05/03/2004 05:00:00	0	0	0	0	0	0	0	0	0	0	0	0	0
05/03/2004 06:00:00	0	0	0	0	0	0	0	0	0	0	0	0	0
05/03/2004 07:00:00	0	0	0	0	0	0	0	0	0	0	0	0	0
05/03/2004 08:00:00	0	0	0	0	0	0	0	0	0	0	0	0	0
05/03/2004 09:00:00	0	0	0	0	0	0	0	0	0	0	0	0	0
05/03/2004 10:00:00	0	0	0	0	0	0	0	0	0	0	0	0	0
05/03/2004 11:00:00	0	0	0	0	0	0	0	0	0	0	0	0	0
05/03/2004 12:00:00	0	0	0	0	0	0	0	0	0	0	0	0	0
05/03/2004 13:00:00	0	0	0	0	0	0	0	0	0	0	0	0	0
05/03/2004 14:00:00	0	0	0	0	0	0	0	0	0	0	0	0	0
05/03/2004 15:00:00	0	0	0	0	0	0	0	0	0	0	0	0	0
05/03/2004 16:00:00	0	0	0	0	0	0	0	0	0	0	0	0	0
05/03/2004 17:00:00	0	0	0	0	0	0	0	0	0	0	0	0	0
05/03/2004 18:00:00	0	0	0	0	0	0	0	0	0	0	0	0	0
05/03/2004 19:00:00	0	0	0	0	0	0	0	0	0	0	0	0	0
05/03/2004 20:00:00	0	0	0	0	0	0	0	0	0	0	0	0	0
05/03/2004 21:00:00	0	0	0	0	0	0	0	0	0	0	0	0	0
05/03/2004 22:00:00	0	0	0	0	0	0	0	0	0	0	0	0	0
05/03/2004 23:00:00	0	0	0	0	0	0	0	0	0	0	0	0	0
06/03/2004 00:00:00	0	0	0	0	0	0	0	0	0	0	0	0	0
06/03/2004 01:00:00	0	0	0	0	0	0	0	0	0	0	0	0	0
06/03/2004 02:00:00	0	0	0	0	0	0	0	0	0	0	0	0	0
06/03/2004 03:00:00	0	0	0	0	0	0	0	0	0	0	0	0	0
06/03/2004 04:00:00	0	0	0	0	0	0	0	0	0	0	0	0	0
06/03/2004 05:00:00	0	0	0	0	0	0	0	0	0	0	0	0	0
06/03/2004 06:00:00	0	0	0	0	0	0	0	0	0	0	0	0	0
06/03/2004 07:00:00	0	0	0	0	0	0	0	0	0	0	0	0	0
06/03/2004 08:00:00	0	0	0	0	0	0	0	0	0	0	0	0	0
06/03/2004 09:00:00	0	0	0	0	0	0	0	0	0	0	0	0	0
06/03/2004 10:00:00	0	0	0	0	0	0	0	0	0	0	0	0	0
06/03/2004 11:00:00	0	0	0	0	0	0	0	0	0	0	0	0	0
06/03/2004 12:00:00	0	0	0	0	0	0	0	0	0	0	0	0	0
06/03/2004 13:00:00	0	0	0	0	0	0	0	0	0	0	0	0	0
06/03/2004 14:00:00	0	0	0	0	0	0	0	0	0	0	0	0	0
06/03/2004 15:00:00	0	0	0	0	0	0	0	0	0	0	0	0	0
06/03/2004 16:00:00	0	0	0	0	0	0	0	0	0	0	0	0	0
06/03/2004 17:00:00	0	0	0	0	0	0	0	0	0	0	0	0	0
06/03/2004 18:00:00	0	0	0	0	0	0	0	0	0	0	0	0	0
06/03/2004 19:00:00	0	0	0	0	0	0	0	0	0	0	0	0	0
06/03/2004 20:00:00	0	0	0	0	0	0	0	0	0	0	0	0	0
06/03/2004 21:00:00	0	0	0	0	0	0	0	0	0	0	0	0	0
06/03/2004 22:00:00	0	0	0	0	0	0	0	0	0	0	0	0	0
06/03/2004 23:00:00	0	0	0	0	0	0	0	0	0	0	0	0	0
07/03/2004 00:00:00	0	0	0	0	0	0	0	0	0	0	0	0	0
07/03/2004 01:00:00	0	0	0	0	0	0	0	0	0	0	0	0	0
07/03/2004 02:00:00	0	0	0	0	0	0	0	0	0	0	0	0	0
07/03/2004 03:00:00	0	0	0	0	0	0	0	0	0	0	0	0	0
07/03/2004 04:00:00	0	0	0	0	0	0	0	0	0	0	0	0	0
07/03/2004 05:00:00	0	0	0	0	0	0	0	0	0	0	0	0	0
07/03/2004 06:00:00	0	0	0	0	0	0	0	0	0	0	0	0	0
07/03/2004 07:00:00	0	0	0	0	0	0	0	0	0	0	0	0	0
07/03/2004 08:00:00	0	0	0	0	0	0	0	0	0	0	0	0	0
07/03/2004 09:00:00	0	0	0	0	0	0	0	0	0	0	0	0	0
07/03/2004 10:00:00	0	0	0	0	0	0	0	0	0	0	0	0	0
07/03/2004 11:00:00	0	0	0	0	0	0	0	0	0	0	0	0	0
07/03/2004 12:00:00	0	0	0	0	0	0	0	0	0	0	0	0	0
07/03/2004 13:00:00	0	0	0	0	0	0	0	0	0	0	0	0	0
07/03/2004 14:00:00	0	0	0	0	0	0	0	0	0	0	0	0	0
07/03/2004 15:00:00	0	0	0	0	0	0	0	0	0	0	0	0	0
07/03/2004 16:00:00	0	0	0	0	0	0	0	0	0	0	0	0	0
07/03/2004 17:00:00	0	0	0	0	0	0	0	0	0	0	0	0	0
07/03/2004 18:00:00	0	0	0	0	0	0	0	0	0	0	0	0	0
07/03/2004 19:00:00	0	0	0	0	0	0	0	0	0	0	0	0	0
07/03/2004 20:00:00	0	0	0	0	0	0	0	0	0	0	0	0	0
07/03/2004 21:00:00	0	0	0	0	0	0	0	0	0	0	0	0	0
07/03/2004 22:00:00	0	0	0	0	0	0	0	0	0	0	0	0	0
07/03/2004 23:00:00	0	0	0	0	0	0	0	0	0	0	0	0	0
08/03/2004 00:00:00	0	0	0	0	0	0	0	0	0	0	0	0	0
08/03/2004 01:00:00	0	0	0	0	0	0	0	0	0	0	0	0	0
08/03/2004 02:00:00	0	0	0	0	0	0	0	0	0	0	0	0	0
08/03/2004 03:00:00	0	0	0	0	0	0	0	0	0	0	0	0	0
08/03/2004 04:00:00	0	0	0	0	0	0	0	0	0	0	0	0	0
08/03/2004 05:00:00	0	0	0	0	0	0	0	0	0	0	0	0	0
08/03/2004 06:00:00	0	0	0	0	0	0	0	0	0	0	0	0	0
08/03/2004 07:00:00	0	0	0	0	0	0	0	0	0	0	0	0	0
08/03/2004 08:00:00	0	0	0	0	0	0	0	0	0	0	0	0	0
08/03/2004 09:00:00	0	0	0	0	0	0	0	0	0	0	0	0	0
08/03/2004 10:00:00	0	0	0	0	0	0	0	0	0	0	0	0	0
08/03/2004 11:00:00	0	0	0	0	0	0	0	0	0	0	0	0	0
08/03/2004 12:00:00	0	0	0	0	0	0	0	0	0	0	0	0	0
08/03/2004 13:00:00	0	0	0	0	0	0	0	0	0	0	0	0	0
08/03/2004 14:00:00	0	0	0	0	0	0	0	0	0	0	0	0	0
08/03/2004 15:00:00	0	0	0	0	0	0	0	0	0	0	0	0	0
08/03/2004 16:00:00	0	0	0	0	0	0	0	0	0	0	0	0	0
08/03/2004 17:00:00	0	0	0	0	0	0	0	0	0	0	0	0	0
08/03/2004 18:00:00	0	0	0	0	0	0	0	0	0	0	0	0	0
08/03/2004 19:00:00	0	0	0	0	0	0	0	0	0	0	0	0	0
08/03/2004 20:00:00	0	0	0	0	0	0	0	0	0	0	0	0	0
08/03/2004 21:00:00	0	0	0	0	0	0	0	0	0	0	0	0	0
08/03/2004 22:00:00	0	0	0	0	0	0	0	0	0	0	0	0	0
08/03/2004 23:00:00	0	0	0	0	0	0	0	0	0	0	0	0	0
09/03/2004 00:00:00	0	0	0	0	0	0	0	0	0	0	0	0	0
09/03/2004 01:00:00	0	0	0	0	0	0	0	0	0	0	0	0	0
09/03/2004 02:00:00	0	0	0	0	0	0	0	0	0	0	0	0	0
09/03/2004 03:00:00	0	0	0	0	0	0	0	0	0	0	0	0	0
09/03/2004 04:00:00	0	0	0	0	0	0	0	0	0	0	0	0	0
09/03/2004 05:00:00	0	0	0	0	0	0	0	0	0	0	0	0	0
09/03/2004 06:00:00	0	0	0	0	0	0	0	0	0	0	0	0	0
09/03/2004 07:00:00	0	0	0	0	0	0	0	0	0	0	0	0	0
09/03/2004 08:00:00	0	0	0	0	0	0	0	0	0	0	0	0	0
09/03/2004 09:00:00	0	0	0	0	0	0	0	0	0	0	0	0	0
09/03/2004 10:00:00	0	0	0	0	0	0	0	0	0	0	0	0	0
09/03/2004 11:00:00	0	0	0	0	0	0	0	0	0	0	0	0	0
09/03/2004 12:00:00	0	0	0	0	0	0	0	0	0	0	0	0	0
09/03/2004 13:00:00	0	0	0	0	0	0	0	0	0	0	0	0	0
09/03/2004 14:00:00	0	0	0	0	0	0	0	0	0	0	0	0	0
09/03/2004 15:00:00	0	0	0	0	0	0	0	0	0	0	0	0	0
09/03/2004 16:00:00	0	0	0	0	0	0	0	0	0	0	0	0	0
09/03/2004 17:00:00	0	0	0	0	0	0	0	0	0	0	0	0	0
09/03/2004 18:00:00	0	0	0	0	0	0	0	0	0	0	0	0	0
09/03/2004 19:00:00	0	0	0	0	0	0	0	0	0	0	0	0	0
09/03/2004 20:00:00	0	0	0	0	0	0	0	0	0	0	0	0	0
09/03/2004 21:00:00	0	0	0	0	0	0	0	0	0	0	0	0	0
09/03/2004 22:00:00	0	0	0	0	0	0	0	0	0	0	0	0	0
09/03/2004 23:00:00	0	0	0	0	0	0	0	0	0	0	0	0	0
10/03/2004 00:00:00	0	0	0	0	0	0	0	0	0	0	0	0	0
10/03/2004 01:00:00	0	0	0	0	0	0	0	0	0	0	0	0	0
10/03/2004 02:00:00	0	0	0	0	0	0	0	0	0	0	0	0	0
10/03/2004 03:00:00	0	0	0	0	0	0	0	0	0	0	0	0	0
10/03/2004 04:00:00	0	0	0	0	0	0	0	0	0	0	0	0	0
10/03/2004 05:00:00	0	0	0	0	0	0	0	0	0	0	0	0	0
10/03/2004 06:00:00	0	0	0	0	0	0	0	0	0	0	0	0	0
10/03/2004 07:00:00	0	0	0	0	0	0	0	0	0	0	0	0	0
10/03/2004 08:00:00	0	0	0	0	0	0	0	0	0	0	0	0	0
10/03/2004 09:00:00	0	0	0	0	0	0	0	0	0	0	0	0	0
10/03/2004 10:00:00	0	0	0	0	0	0	0	0	0	0	0	0	0
10/03/2004 11:00:00	0	0	0	0	0	0	0	0	0	0	0	0	0
10/03/2004 12:00:00	0	0	0	0	0	0	0	0	0	0	0	0	0
10/03/2004 13:00:00	0	0	0	0	0	0	0	0	0	0	0	0	0
10/03/2004 14:00:00	0	0	0	0	0	0	0	0	0	0	0	0	0
10/03/2004 15:00:00	0	0	0	0	0	0	0	0	0	0	0	0	0
10/03/2004 16:00:00	0	0	0	0	0	0	0	0	0	0	0	0	0
10/03/2004 17:00:00	0	0	0	0	0	0	0	0	0	0	0	0	0
10/03/2004 18:00:00	0	0	0	0	0	0	0	0	0	0	0	0	0
10/03/2004 19:00:00	0	0	0	0	0	0	0	0	0	0	0	0	0
10/03/2004 20:00:00	0	0	0	0	0	0	0	0	0	0	0	0	0
10/03/2004 21:00:00	0	0	0	0	0	0	0	0	0	0	0	0	0
10/03/2004 22:00:00	0	0	0	0	0	0	0	0	0	0	0	0	0
10/03/2004 23:00:00	0	0	0	0	0	0	0	0	0	0	0	0	0
11/03/2004 00:00:00	0.333333333	0.491666667	0.270833333	0.404166667	0.391666667	0.791666667	0.2875	0.329166667	0.158333333	0.208333333	0.291666667	0.275	0.195833333
11/03/2004 01:00:00	0.333333333	0.491666667	0.270833333	0.404166667	0.391666667	0.791666667	0.2875	0.329166667	0.158333333	0.208333333	0.291666667	0.275	0.195833333
11/03/2004 02:00:00	0.333333333	0.491666667	0.270833333	0.404166667	0.391666667	0.791666667	0.2875	0.329166667	0.158333333	0.208333333	0.291666667	0.275	0.195833333
11/03/2004 03:00:00	0.333333333	0.491666667	0.270833333	0.404166667	0.391666667	0.791666667	0.2875	0.329166667	0.158333333	0.208333333	0.291666667	0.275	0.195833333
11/03/2004 04:00:00	0.333333333	0.491666667	0.270833333	0.404166667	0.391666667	0.791666667	0.2875	0.329166667	0.158333333	0.208333333	0.291666667	0.275	0.195833333
11/03/2004 05:00:00	0.333333333	0.491666667	0.270833333	0.404166667	0.391666667	0.791666667	0.2875	0.329166667	0.158333333	0.208333333	0.291666667	0.275	0.195833333
11/03/2004 06:00:00	0.333333333	0.491666667	0.270833333	0.404166667	0.391666667	0.791666667	0.2875	0.329166667	0.158333333	0.208333333	0.291666667	0.275	0.195833333
11/03/2004 07:00:00	0.333333333	0.491666667	0.270833333	0.404166667	0.391666667	0.791666667	0.2875	0.329166667	0.158333333	0.208333333	0.291666667	0.275	0.195833333
11/03/2004 08:00:00	0.333333333	0.491666667	0.270833333	0.404166667	0.391666667	0.791666667	0.2875	0.329166667	0.158333333	0.208333333	0.291666667	0.275	0.195833333
11/03/2004 09:00:00	0.333333333	0.491666667	0.270833333	0.404166667	0.391666667	0.791666667	0.2875	0.329166667	0.158333333	0.208333333	0.291666667	0.275	0.195833333
11/03/2004 10:00:00	0.333333333	0.491666667	0.270833333	0.404166667	0.391666667	0.791666667	0.2875	0.329166667	0.158333333	0.208333333	0.291666667	0.275	0.195833333
11/03/2004 11:00:00	0.333333333	0.491666667	0.270833333	0.404166667	0.391666667	0.791666667	0.2875	0.329166667	0.158333333	0.208333333	0.291666667	0.275	0.195833333
11/03/2004 12:00:00	0.333333333	0.491666667	0.270833333	0.404166667	0.391666667	0.791666667	0.2875	0.329166667	0.158333333	0.208333333	0.291666667	0.275	0.195833333
11/03/2004 13:00:00	0.333333333	0.491666667	0.270833333	0.404166667	0.391666667	0.791666667	0.2875	0.329166667	0.158333333	0.208333333	0.291666667	0.275	0.195833333
11/03/2004 14:00:00	0.333333333	0.491666667	0.270833333	0.404166667	0.391666667	0.791666667	0.2875	0.329166667	0.158333333	0.208333333	0.291666667	0.275	0.195833333
11/03/2004 15:00:00	0.333333333	0.491666667	0.270833333	0.404166667	0.391666667	0.791666667	0.2875	0.329166667	0.158333333	0.208333333	0.291666667	0.275	0.195833333
11/03/2004 16:00:00	0.333333333	0.491666667	0.270833333	0.404166667	0.391666667	0.791666667	0.2875	0.329166667	0.158333333	0.208333333	0.291666667	0.275	0.195833333
11/03/2004 17:00:00	0.333333333	0.491666667	0.270833333	0.404166667	0.391666667	0.791666667	0.2875	0.329166667	0.158333333	0.208333333	0.291666667	0.275	0.195833333
11/03/2004 18:00:00	0.333333333	0.491666667	0.270833333	0.404166667	0.391666667	0.791666667	0.2875	0.329166667	0.158333333	0.208333333	0.291666667	0.275	0.195833333
11/03/2004 19:00:00	0.333333333	0.491666667	0.270833333	0.404166667	0.391666667	0.791666667	0.2875	0.329166667	0.158333333	0.208333333	0.291666667	0.275	0.195833333
11/03/2004 20:00:00	0.333333333	0.491666667	0.270833333	0.404166667	0.391666667	0.791666667	0.2875	0.329166667	0.158333333	0.208333333	0.291666667	0.275	0.195833333
11/03/2004 21:00:00	0.333333333	0.491666667	0.270833333	0.404166667	0.391666667	0.791666667	0.2875	0.329166667	0.158333333	0.208333333	0.291666667	0.275	0.195833333
11/03/2004 22:00:00	0.333333333	0.491666667	0.270833333	0.404166667	0.391666667	0.791666667	0.2875	0.329166667	0.158333333	0.208333333	0.291666667	0.275	0.195833333
11/03/2004 23:00:00	0.333333333	0.491666667	0.270833333	0.404166667	0.391666667	0.791666667	0.2875	0.329166667	0.158333333	0.208333333	0.291666667	0.275	0.195833333
12/03/2004 00:00:00	0	0	0	0	0	0	0	0	0	0	0	0	0
12/03/2004 01:00:00	0	0	0	0	0	0	0	0	0	0	0	0	0
12/03/2004 02:00:00	0	0	0	0	0	0	0	0	0	0	0	0	0
12/03/2004 03:00:00	0	0	0	0	0	0	0	0	0	0	0	0	0
12/03/2004 04:00:00	0	0	0	0	0	0	0	0	0	0	0	0	0
12/03/2004 05:00:00	0	0	0	0	0	0	0	0	0	0	0	0	0
12/03/2004 06:00:00	0	0	0	0	0	0	0	0	0	0	0	0	0
12/03/2004 07:00:00	0	0	0	0	0	0	0	0	0	0	0	0	0
12/03/2004 08:00:00	0	0	0	0	0	0	0	0	0	0	0	0	0
12/03/2004 09:00:00	0	0	0	0	0	0	0	0	0	0	0	0	0
12/03/2004 10:00:00	0	0	0	0	0	0	0	0	0	0	0	0	0
12/03/2004 11:00:00	0	0	0	0	0	0	0	0	0	0	0	0	0
12/03/2004 12:00:00	0	0	0	0	0	0	0	0	0	0	0	0	0
12/03/2004 13:00:00	0	0	0	0	0	0	0	0	0	0	0	0	0
12/03/2004 14:00:00	0	0	0	0	0	0	0	0	0	0	0	0	0
12/03/2004 15:00:00	0	0	0	0	0	0	0	0	0	0	0	0	0
12/03/2004 16:00:00	0	0	0	0	0	0	0	0	0	0	0	0	0
12/03/2004 17:00:00	0	0	0	0	0	0	0	0	0	0	0	0	0
12/03/2004 18:00:00	0	0	0	0	0	0	0	0	0	0	0	0	0
12/03/2004 19:00:00	0	0	0	0	0	0	0	0	0	0	0	0	0
12/03/2004 20:00:00	0	0	0	0	0	0	0	0	0	0	0	0	0
12/03/2004 21:00:00	0	0	0	0	0	0	0	0	0	0	0	0	0
12/03/2004 22:00:00	0	0	0	0	0	0	0	0	0	0	0	0	0
12/03/2004 23:00:00	0	0	0	0	0	0	0	0	0	0	0	0	0
13/03/2004 00:00:00	0	0	0	0	0	0	0	0	0	0	0	0	0
13/03/2004 01:00:00	0	0	0	0	0	0	0	0	0	0	0	0	0
13/03/2004 02:00:00	0	0	0	0	0	0	0	0	0	0	0	0	0
13/03/2004 03:00:00	0	0	0	0	0	0	0	0	0	0	0	0	0
13/03/2004 04:00:00	0	0	0	0	0	0	0	0	0	0	0	0	0
13/03/2004 05:00:00	0	0	0	0	0	0	0	0	0	0	0	0	0
13/03/2004 06:00:00	0	0	0	0	0	0	0	0	0	0	0	0	0
13/03/2004 07:00:00	0	0	0	0	0	0	0	0	0	0	0	0	0
13/03/2004 08:00:00	0	0	0	0	0	0	0	0	0	0	0	0	0
13/03/2004 09:00:00	0	0	0	0	0	0	0	0	0	0	0	0	0
13/03/2004 10:00:00	0	0	0	0	0	0	0	0	0	0	0	0	0
13/03/2004 11:00:00	0	0	0	0	0	0	0	0	0	0	0	0	0
13/03/2004 12:00:00	0	0	0	0	0	0	0	0	0	0	0	0	0
13/03/2004 13:00:00	0	0	0	0	0	0	0	0	0	0	0	0	0
13/03/2004 14:00:00	0	0	0	0	0	0	0	0	0	0	0	0	0
13/03/2004 15:00:00	0	0	0	0	0	0	0	0	0	0	0	0	0
13/03/2004 16:00:00	0	0	0	0	0	0	0	0	0	0	0	0	0
13/03/2004 17:00:00	0	0	0	0	0	0	0	0	0	0	0	0	0
13/03/2004 18:00:00	0	0	0	0	0	0	0	0	0	0	0	0	0
13/03/2004 19:00:00	0	0	0	0	0	0	0	0	0	0	0	0	0
13/03/2004 20:00:00	0	0	0	0	0	0	0	0	0	0	0	0	0
13/03/2004 21:00:00	0	0	0	0	0	0	0	0	0	0	0	0	0
13/03/2004 22:00:00	0	0	0	0	0	0	0	0	0	0	0	0	0
13/03/2004 23:00:00	0	0	0	0	0	0	0	0	0	0	0	0	0
14/03/2004 00:00:00	0	0	0	0	0	0	0	0	0	0	0	0	0
14/03/2004 01:00:00	0	0	0	0	0	0	0	0	0	0	0	0	0
14/03/2004 02:00:00	0	0	0	0	0	0	0	0	0	0	0	0	0
14/03/2004 03:00:00	0	0	0	0	0	0	0	0	0	0	0	0	0
14/03/2004 04:00:00	0	0	0	0	0	0	0	0	0	0	0	0	0
14/03/2004 05:00:00	0	0	0	0	0	0	0	0	0	0	0	0	0
14/03/2004 06:00:00	0	0	0	0	0	0	0	0	0	0	0	0	0
14/03/2004 07:00:00	0	0	0	0	0	0	0	0	0	0	0	0	0
14/03/2004 08:00:00	0	0	0	0	0	0	0	0	0	0	0	0	0
14/03/2004 09:00:00	0	0	0	0	0	0	0	0	0	0	0	0	0
14/03/2004 10:00:00	0	0	0	0	0	0	0	0	0	0	0	0	0
14/03/2004 11:00:00	0	0	0	0	0	0	0	0	0	0	0	0	0
14/03/2004 12:00:00	0	0	0	0	0	0	0	0	0	0	0	0	0
14/03/2004 13:00:00	0	0	0	0	0	0	0	0	0	0	0	0	0
14/03/2004 14:00:00	0	0	0	0	0	0	0	0	0	0	0	0	0
14/03/2004 15:00:00	0	0	0	0	0	0	0	0	0	0	0	0	0
14/03/2004 16:00:00	0	0	0	0	0	0	0	0	0	0	0	0	0
14/03/2004 17:00:00	0	0	0	0	0	0	0	0	0	0	0	0	0
14/03/2004 18:00:00	0	0	0	0	0	0	0	0	0	0	0	0	0
14/03/2004 19:00:00	0	0	0	0	0	0	0	0	0	0	0	0	0
14/03/2004 20:00:00	0	0	0	0	0	0	0	0	0	0	0	0	0
14/03/2004 21:00:00	0	0	0	0	0	0	0	0	0	0	0	0	0
14/03/2004 22:00:00	0	0	0	0	0	0	0	0	0	0	0	0	0
14/03/2004 23:00:00	0	0	0	0	0	0	0	0	0	0	0	0	0
15/03/2004 00:00:00	0	0	0	0	0	0	0	0	0	0	0	0	0
15/03/2004 01:00:00	0	0	0	0	0	0	0	0	0	0	0	0	0
15/03/2004 02:00:00	0	0	0	0	0	0	0	0	0	0	0	0	0
15/03/2004 03:00:00	0	0	0	0	0	0	0	0	0	0	0	0	0
15/03/2004 04:00:00	0	0	0	0	0	0	0	0	0	0	0	0	0
15/03/2004 05:00:00	0	0	0	0	0	0	0	0	0	0	0	0	0
15/03/2004 06:00:00	0	0	0	0	0	0	0	0	0	0	0	0	0
15/03/2004 07:00:00	0	0	0	0	0	0	0	0	0	0	0	0	0
15/03/2004 08:00:00	0	0	0	0	0	0	0	0	0	0	0	0	0
15/03/2004 09:00:00	0	0	0	0	0	0	0	0	0	0	0	0	0
15/03/2004 10:00:00	0	0	0	0	0	0	0	0	0	0	0	0	0
15/03/2004 11:00:00	0	0	0	0	0	0	0	0	0	0	0	0	0
15/03/2004 12:00:00	0	0	0	0	0	0	0	0	0	0	0	0	0
15/03/2004 13:00:00	0	0	0	0	0	0	0	0	0	0	0	0	0
15/03/2004 14:00:00	0	0	0	0	0	0	0	0	0	0	0	0	0
15/03/2004 15:00:00	0	0	0	0	0	0	0	0	0	0	0	0	0
15/03/2004 16:00:00	0	0	0	0	0	0	0	0	0	0	0	0	0
15/03/2004 17:00:00	0	0	0	0	0	0	0	0	0	0	0	0	0
15/03/2004 18:00:00	0	0	0	0	0	0	0	0	0	0	0	0	0
15/03/2004 19:00:00	0	0	0	0	0	0	0	0	0	0	0	0	0
15/03/2004 20:00:00	0	0	0	0	0	0	0	0	0	0	0	0	0
15/03/2004 21:00:00	0	0	0	0	0	0	0	0	0	0	0	0	0
15/03/2004 22:00:00	0	0	0	0	0	0	0	0	0	0	0	0	0
15/03/2004 23:00:00	0	0	0	0	0	0	0	0	0	0	0	0	0
16/03/2004 00:00:00	0	0	0	0	0	0	0	0	0	0	0.075	0	0.020833333
16/03/2004 01:00:00	0	0	0	0	0	0	0	0	0	0	0.075	0	0.020833333
16/03/2004 02:00:00	0	0	0	0	0	0	0	0	0	0	0.075	0	0.020833333
16/03/2004 03:00:00	0	0	0	0	0	0	0	0	0	0	0.075	0	0.020833333
16/03/2004 04:00:00	0	0	0	0	0	0	0	0	0	0	0.075	0	0.020833333
16/03/2004 05:00:00	0	0	0	0	0	0	0	0	0	0	0.075	0	0.020833333
16/03/2004 06:00:00	0	0	0	0	0	0	0	0	0	0	0.075	0	0.020833333
16/03/2004 07:00:00	0	0	0	0	0	0	0	0	0	0	0.075	0	0.020833333
16/03/2004 08:00:00	0	0	0	0	0	0	0	0	0	0	0.075	0	0.020833333
16/03/2004 09:00:00	0	0	0	0	0	0	0	0	0	0	0.075	0	0.020833333
16/03/2004 10:00:00	0	0	0	0	0	0	0	0	0	0	0.075	0	0.020833333
16/03/2004 11:00:00	0	0	0	0	0	0	0	0	0	0	0.075	0	0.020833333
16/03/2004 12:00:00	0	0	0	0	0	0	0	0	0	0	0.075	0	0.020833333
16/03/2004 13:00:00	0	0	0	0	0	0	0	0	0	0	0.075	0	0.020833333
16/03/2004 14:00:00	0	0	0	0	0	0	0	0	0	0	0.075	0	0.020833333
16/03/2004 15:00:00	0	0	0	0	0	0	0	0	0	0	0.075	0	0.020833333
16/03/2004 16:00:00	0	0	0	0	0	0	0	0	0	0	0.075	0	0.020833333
16/03/2004 17:00:00	0	0	0	0	0	0	0	0	0	0	0.075	0	0.020833333
16/03/2004 18:00:00	0	0	0	0	0	0	0	0	0	0	0.075	0	0.020833333
16/03/2004 19:00:00	0	0	0	0	0	0	0	0	0	0	0.075	0	0.020833333
16/03/2004 20:00:00	0	0	0	0	0	0	0	0	0	0	0.075	0	0.020833333
16/03/2004 21:00:00	0	0	0	0	0	0	0	0	0	0	0.075	0	0.020833333
16/03/2004 22:00:00	0	0	0	0	0	0	0	0	0	0	0.075	0	0.020833333
16/03/2004 23:00:00	0	0	0	0	0	0	0	0	0	0	0.075	0	0.020833333
17/03/2004 00:00:00	0	0	0	0	0	0	0	0	0	0	0	0	0
17/03/2004 01:00:00	0	0	0	0	0	0	0	0	0	0	0	0	0
17/03/2004 02:00:00	0	0	0	0	0	0	0	0	0	0	0	0	0
17/03/2004 03:00:00	0	0	0	0	0	0	0	0	0	0	0	0	0
17/03/2004 04:00:00	0	0	0	0	0	0	0	0	0	0	0	0	0
17/03/2004 05:00:00	0	0	0	0	0	0	0	0	0	0	0	0	0
17/03/2004 06:00:00	0	0	0	0	0	0	0	0	0	0	0	0	0
17/03/2004 07:00:00	0	0	0	0	0	0	0	0	0	0	0	0	0
17/03/2004 08:00:00	0	0	0	0	0	0	0	0	0	0	0	0	0
17/03/2004 09:00:00	0	0	0	0	0	0	0	0	0	0	0	0	0
17/03/2004 10:00:00	0	0	0	0	0	0	0	0	0	0	0	0	0
17/03/2004 11:00:00	0	0	0	0	0	0	0	0	0	0	0	0	0
17/03/2004 12:00:00	0	0	0	0	0	0	0	0	0	0	0	0	0
17/03/2004 13:00:00	0	0	0	0	0	0	0	0	0	0	0	0	0
17/03/2004 14:00:00	0	0	0	0	0	0	0	0	0	0	0	0	0
17/03/2004 15:00:00	0	0	0	0	0	0	0	0	0	0	0	0	0
17/03/2004 16:00:00	0	0	0	0	0	0	0	0	0	0	0	0	0
17/03/2004 17:00:00	0	0	0	0	0	0	0	0	0	0	0	0	0
17/03/2004 18:00:00	0	0	0	0	0	0	0	0	0	0	0	0	0
17/03/2004 19:00:00	0	0	0	0	0	0	0	0	0	0	0	0	0
17/03/2004 20:00:00	0	0	0	0	0	0	0	0	0	0	0	0	0
17/03/2004 21:00:00	0	0	0	0	0	0	0	0	0	0	0	0	0
17/03/2004 22:00:00	0	0	0	0	0	0	0	0	0	0	0	0	0
17/03/2004 23:00:00	0	0	0	0	0	0	0	0	0	0	0	0	0
18/03/2004 00:00:00	0	0	0	0	0	0	0	0	0	0	0	0	0
18/03/2004 01:00:00	0	0	0	0	0	0	0	0	0	0	0	0	0
18/03/2004 02:00:00	0	0	0	0	0	0	0	0	0	0	0	0	0
18/03/2004 03:00:00	0	0	0	0	0	0	0	0	0	0	0	0	0
18/03/2004 04:00:00	0	0	0	0	0	0	0	0	0	0	0	0	0
18/03/2004 05:00:00	0	0	0	0	0	0	0	0	0	0	0	0	0
18/03/2004 06:00:00	0	0	0	0	0	0	0	0	0	0	0	0	0
18/03/2004 07:00:00	0	0	0	0	0	0	0	0	0	0	0	0	0
18/03/2004 08:00:00	0	0	0	0	0	0	0	0	0	0	0	0	0
18/03/2004 09:00:00	0	0	0	0	0	0	0	0	0	0	0	0	0
18/03/2004 10:00:00	0	0	0	0	0	0	0	0	0	0	0	0	0
18/03/2004 11:00:00	0	0	0	0	0	0	0	0	0	0	0	0	0
18/03/2004 12:00:00	0	0	0	0	0	0	0	0	0	0	0	0	0
18/03/2004 13:00:00	0	0	0	0	0	0	0	0	0	0	0	0	0
18/03/2004 14:00:00	0	0	0	0	0	0	0	0	0	0	0	0	0
18/03/2004 15:00:00	0	0	0	0	0	0	0	0	0	0	0	0	0
18/03/2004 16:00:00	0	0	0	0	0	0	0	0	0	0	0	0	0
18/03/2004 17:00:00	0	0	0	0	0	0	0	0	0	0	0	0	0
18/03/2004 18:00:00	0	0	0	0	0	0	0	0	0	0	0	0	0
18/03/2004 19:00:00	0	0	0	0	0	0	0	0	0	0	0	0	0
18/03/2004 20:00:00	0	0	0	0	0	0	0	0	0	0	0	0	0
18/03/2004 21:00:00	0	0	0	0	0	0	0	0	0	0	0	0	0
18/03/2004 22:00:00	0	0	0	0	0	0	0	0	0	0	0	0	0
18/03/2004 23:00:00	0	0	0	0	0	0	0	0	0	0	0	0	0
19/03/2004 00:00:00	0.5875	0.429166667	0.9625	0.720833333	1.0625	0.729166667	0.820833333	0.858333333	0.833333333	0.529166667	0.708333333	0.695833333	0.35
19/03/2004 01:00:00	0.5875	0.429166667	0.9625	0.720833333	1.0625	0.729166667	0.820833333	0.858333333	0.833333333	0.529166667	0.708333333	0.695833333	0.35
19/03/2004 02:00:00	0.5875	0.429166667	0.9625	0.720833333	1.0625	0.729166667	0.820833333	0.858333333	0.833333333	0.529166667	0.708333333	0.695833333	0.35
19/03/2004 03:00:00	0.5875	0.429166667	0.9625	0.720833333	1.0625	0.729166667	0.820833333	0.858333333	0.833333333	0.529166667	0.708333333	0.695833333	0.35
19/03/2004 04:00:00	0.5875	0.429166667	0.9625	0.720833333	1.0625	0.729166667	0.820833333	0.858333333	0.833333333	0.529166667	0.708333333	0.695833333	0.35
19/03/2004 05:00:00	0.5875	0.429166667	0.9625	0.720833333	1.0625	0.729166667	0.820833333	0.858333333	0.833333333	0.529166667	0.708333333	0.695833333	0.35
19/03/2004 06:00:00	0.5875	0.429166667	0.9625	0.720833333	1.0625	0.729166667	0.820833333	0.858333333	0.833333333	0.529166667	0.708333333	0.695833333	0.35
19/03/2004 07:00:00	0.5875	0.429166667	0.9625	0.720833333	1.0625	0.729166667	0.820833333	0.858333333	0.833333333	0.529166667	0.708333333	0.695833333	0.35
19/03/2004 08:00:00	0.5875	0.429166667	0.9625	0.720833333	1.0625	0.729166667	0.820833333	0.858333333	0.833333333	0.529166667	0.708333333	0.695833333	0.35
19/03/2004 09:00:00	0.5875	0.429166667	0.9625	0.720833333	1.0625	0.729166667	0.820833333	0.858333333	0.833333333	0.529166667	0.708333333	0.695833333	0.35
19/03/2004 10:00:00	0.5875	0.429166667	0.9625	0.720833333	1.0625	0.729166667	0.820833333	0.858333333	0.833333333	0.529166667	0.708333333	0.695833333	0.35
19/03/2004 11:00:00	0.5875	0.429166667	0.9625	0.720833333	1.0625	0.729166667	0.820833333	0.858333333	0.833333333	0.529166667	0.708333333	0.695833333	0.35
19/03/2004 12:00:00	0.5875	0.429166667	0.9625	0.720833333	1.0625	0.729166667	0.820833333	0.858333333	0.833333333	0.529166667	0.708333333	0.695833333	0.35
19/03/2004 13:00:00	0.5875	0.429166667	0.9625	0.720833333	1.0625	0.729166667	0.820833333	0.858333333	0.833333333	0.529166667	0.708333333	0.695833333	0.35
19/03/2004 14:00:00	0.5875	0.429166667	0.9625	0.720833333	1.0625	0.729166667	0.820833333	0.858333333	0.833333333	0.529166667	0.708333333	0.695833333	0.35
19/03/2004 15:00:00	0.5875	0.429166667	0.9625	0.720833333	1.0625	0.729166667	0.820833333	0.858333333	0.833333333	0.529166667	0.708333333	0.695833333	0.35
19/03/2004 16:00:00	0.5875	0.429166667	0.9625	0.720833333	1.0625	0.729166667	0.820833333	0.858333333	0.833333333	0.529166667	0.708333333	0.695833333	0.35
19/03/2004 17:00:00	0.5875	0.429166667	0.9625	0.720833333	1.0625	0.729166667	0.820833333	0.858333333	0.833333333	0.529166667	0.708333333	0.695833333	0.35
19/03/2004 18:00:00	0.5875	0.429166667	0.9625	0.720833333	1.0625	0.729166667	0.820833333	0.858333333	0.833333333	0.529166667	0.708333333	0.695833333	0.35
19/03/2004 19:00:00	0.5875	0.429166667	0.9625	0.720833333	1.0625	0.729166667	0.820833333	0.858333333	0.833333333	0.529166667	0.708333333	0.695833333	0.35
19/03/2004 20:00:00	0.5875	0.429166667	0.9625	0.720833333	1.0625	0.729166667	0.820833333	0.858333333	0.833333333	0.529166667	0.708333333	0.695833333	0.35
19/03/2004 21:00:00	0.5875	0.429166667	0.9625	0.720833333	1.0625	0.729166667	0.820833333	0.858333333	0.833333333	0.529166667	0.708333333	0.695833333	0.35
19/03/2004 22:00:00	0.5875	0.429166667	0.9625	0.720833333	1.0625	0.729166667	0.820833333	0.858333333	0.833333333	0.529166667	0.708333333	0.695833333	0.35
19/03/2004 23:00:00	0.5875	0.429166667	0.9625	0.720833333	1.0625	0.729166667	0.820833333	0.858333333	0.833333333	0.529166667	0.708333333	0.695833333	0.35
20/03/2004 00:00:00	0.704166667	0.675	0.679166667	0.75	0.791666667	0.791666667	0.695833333	0.6875	0.775	0.845833333	0.770833333	0.55	0.9
20/03/2004 01:00:00	0.704166667	0.675	0.679166667	0.75	0.791666667	0.791666667	0.695833333	0.6875	0.775	0.845833333	0.770833333	0.55	0.9
20/03/2004 02:00:00	0.704166667	0.675	0.679166667	0.75	0.791666667	0.791666667	0.695833333	0.6875	0.775	0.845833333	0.770833333	0.55	0.9
20/03/2004 03:00:00	0.704166667	0.675	0.679166667	0.75	0.791666667	0.791666667	0.695833333	0.6875	0.775	0.845833333	0.770833333	0.55	0.9
20/03/2004 04:00:00	0.704166667	0.675	0.679166667	0.75	0.791666667	0.791666667	0.695833333	0.6875	0.775	0.845833333	0.770833333	0.55	0.9
20/03/2004 05:00:00	0.704166667	0.675	0.679166667	0.75	0.791666667	0.791666667	0.695833333	0.6875	0.775	0.845833333	0.770833333	0.55	0.9
20/03/2004 06:00:00	0.704166667	0.675	0.679166667	0.75	0.791666667	0.791666667	0.695833333	0.6875	0.775	0.845833333	0.770833333	0.55	0.9
20/03/2004 07:00:00	0.704166667	0.675	0.679166667	0.75	0.791666667	0.791666667	0.695833333	0.6875	0.775	0.845833333	0.770833333	0.55	0.9
20/03/2004 08:00:00	0.704166667	0.675	0.679166667	0.75	0.791666667	0.791666667	0.695833333	0.6875	0.775	0.845833333	0.770833333	0.55	0.9
20/03/2004 09:00:00	0.704166667	0.675	0.679166667	0.75	0.791666667	0.791666667	0.695833333	0.6875	0.775	0.845833333	0.770833333	0.55	0.9
20/03/2004 10:00:00	0.704166667	0.675	0.679166667	0.75	0.791666667	0.791666667	0.695833333	0.6875	0.775	0.845833333	0.770833333	0.55	0.9
20/03/2004 11:00:00	0.704166667	0.675	0.679166667	0.75	0.791666667	0.791666667	0.695833333	0.6875	0.775	0.845833333	0.770833333	0.55	0.9
20/03/2004 12:00:00	0.704166667	0.675	0.679166667	0.75	0.791666667	0.791666667	0.695833333	0.6875	0.775	0.845833333	0.770833333	0.55	0.9
20/03/2004 13:00:00	0.704166667	0.675	0.679166667	0.75	0.791666667	0.791666667	0.695833333	0.6875	0.775	0.845833333	0.770833333	0.55	0.9
20/03/2004 14:00:00	0.704166667	0.675	0.679166667	0.75	0.791666667	0.791666667	0.695833333	0.6875	0.775	0.845833333	0.770833333	0.55	0.9
20/03/2004 15:00:00	0.704166667	0.675	0.679166667	0.75	0.791666667	0.791666667	0.695833333	0.6875	0.775	0.845833333	0.770833333	0.55	0.9
20/03/2004 16:00:00	0.704166667	0.675	0.679166667	0.75	0.791666667	0.791666667	0.695833333	0.6875	0.775	0.845833333	0.770833333	0.55	0.9
20/03/2004 17:00:00	0.704166667	0.675	0.679166667	0.75	0.791666667	0.791666667	0.695833333	0.6875	0.775	0.845833333	0.770833333	0.55	0.9
20/03/2004 18:00:00	0.704166667	0.675	0.679166667	0.75	0.791666667	0.791666667	0.695833333	0.6875	0.775	0.845833333	0.770833333	0.55	0.9
20/03/2004 19:00:00	0.704166667	0.675	0.679166667	0.75	0.791666667	0.791666667	0.695833333	0.6875	0.775	0.845833333	0.770833333	0.55	0.9
20/03/2004 20:00:00	0.704166667	0.675	0.679166667	0.75	0.791666667	0.791666667	0.695833333	0.6875	0.775	0.845833333	0.770833333	0.55	0.9
20/03/2004 21:00:00	0.704166667	0.675	0.679166667	0.75	0.791666667	0.791666667	0.695833333	0.6875	0.775	0.845833333	0.770833333	0.55	0.9
20/03/2004 22:00:00	0.704166667	0.675	0.679166667	0.75	0.791666667	0.791666667	0.695833333	0.6875	0.775	0.845833333	0.770833333	0.55	0.9
20/03/2004 23:00:00	0.704166667	0.675	0.679166667	0.75	0.791666667	0.791666667	0.695833333	0.6875	0.775	0.845833333	0.770833333	0.55	0.9
21/03/2004 00:00:00	0	0	0	0	0.008333333	0	0	0	0	0	0	0	0
21/03/2004 01:00:00	0	0	0	0	0.008333333	0	0	0	0	0	0	0	0
21/03/2004 02:00:00	0	0	0	0	0.008333333	0	0	0	0	0	0	0	0
21/03/2004 03:00:00	0	0	0	0	0.008333333	0	0	0	0	0	0	0	0
21/03/2004 04:00:00	0	0	0	0	0.008333333	0	0	0	0	0	0	0	0
21/03/2004 05:00:00	0	0	0	0	0.008333333	0	0	0	0	0	0	0	0
21/03/2004 06:00:00	0	0	0	0	0.008333333	0	0	0	0	0	0	0	0
21/03/2004 07:00:00	0	0	0	0	0.008333333	0	0	0	0	0	0	0	0
21/03/2004 08:00:00	0	0	0	0	0.008333333	0	0	0	0	0	0	0	0
21/03/2004 09:00:00	0	0	0	0	0.008333333	0	0	0	0	0	0	0	0
21/03/2004 10:00:00	0	0	0	0	0.008333333	0	0	0	0	0	0	0	0
21/03/2004 11:00:00	0	0	0	0	0.008333333	0	0	0	0	0	0	0	0
21/03/2004 12:00:00	0	0	0	0	0.008333333	0	0	0	0	0	0	0	0
21/03/2004 13:00:00	0	0	0	0	0.008333333	0	0	0	0	0	0	0	0
21/03/2004 14:00:00	0	0	0	0	0.008333333	0	0	0	0	0	0	0	0
21/03/2004 15:00:00	0	0	0	0	0.008333333	0	0	0	0	0	0	0	0
21/03/2004 16:00:00	0	0	0	0	0.008333333	0	0	0	0	0	0	0	0
21/03/2004 17:00:00	0	0	0	0	0.008333333	0	0	0	0	0	0	0	0
21/03/2004 18:00:00	0	0	0	0	0.008333333	0	0	0	0	0	0	0	0
21/03/2004 19:00:00	0	0	0	0	0.008333333	0	0	0	0	0	0	0	0
21/03/2004 20:00:00	0	0	0	0	0.008333333	0	0	0	0	0	0	0	0
21/03/2004 21:00:00	0	0	0	0	0.008333333	0	0	0	0	0	0	0	0
21/03/2004 22:00:00	0	0	0	0	0.008333333	0	0	0	0	0	0	0	0
21/03/2004 23:00:00	0	0	0	0	0.008333333	0	0	0	0	0	0	0	0
22/03/2004 00:00:00	0	0	0	0	0	0	0	0	0	0	0	0	0
22/03/2004 01:00:00	0	0	0	0	0	0	0	0	0	0	0	0	0
22/03/2004 02:00:00	0	0	0	0	0	0	0	0	0	0	0	0	0
22/03/2004 03:00:00	0	0	0	0	0	0	0	0	0	0	0	0	0
22/03/2004 04:00:00	0	0	0	0	0	0	0	0	0	0	0	0	0
22/03/2004 05:00:00	0	0	0	0	0	0	0	0	0	0	0	0	0
22/03/2004 06:00:00	0	0	0	0	0	0	0	0	0	0	0	0	0
22/03/2004 07:00:00	0	0	0	0	0	0	0	0	0	0	0	0	0
22/03/2004 08:00:00	0	0	0	0	0	0	0	0	0	0	0	0	0
22/03/2004 09:00:00	0	0	0	0	0	0	0	0	0	0	0	0	0
22/03/2004 10:00:00	0	0	0	0	0	0	0	0	0	0	0	0	0
22/03/2004 11:00:00	0	0	0	0	0	0	0	0	0	0	0	0	0
22/03/2004 12:00:00	0	0	0	0	0	0	0	0	0	0	0	0	0
22/03/2004 13:00:00	0	0	0	0	0	0	0	0	0	0	0	0	0
22/03/2004 14:00:00	0	0	0	0	0	0	0	0	0	0	0	0	0
22/03/2004 15:00:00	0	0	0	0	0	0	0	0	0	0	0	0	0
22/03/2004 16:00:00	0	0	0	0	0	0	0	0	0	0	0	0	0
22/03/2004 17:00:00	0	0	0	0	0	0	0	0	0	0	0	0	0
22/03/2004 18:00:00	0	0	0	0	0	0	0	0	0	0	0	0	0
22/03/2004 19:00:00	0	0	0	0	0	0	0	0	0	0	0	0	0
22/03/2004 20:00:00	0	0	0	0	0	0	0	0	0	0	0	0	0
22/03/2004 21:00:00	0	0	0	0	0	0	0	0	0	0	0	0	0
22/03/2004 22:00:00	0	0	0	0	0	0	0	0	0	0	0	0	0
22/03/2004 23:00:00	0	0	0	0	0	0	0	0	0	0	0	0	0
23/03/2004 00:00:00	0	0	0	0	0	0	0	0	0	0	0	0	0
23/03/2004 01:00:00	0	0	0	0	0	0	0	0	0	0	0	0	0
23/03/2004 02:00:00	0	0	0	0	0	0	0	0	0	0	0	0	0
23/03/2004 03:00:00	0	0	0	0	0	0	0	0	0	0	0	0	0
23/03/2004 04:00:00	0	0	0	0	0	0	0	0	0	0	0	0	0
23/03/2004 05:00:00	0	0	0	0	0	0	0	0	0	0	0	0	0
23/03/2004 06:00:00	0	0	0	0	0	0	0	0	0	0	0	0	0
23/03/2004 07:00:00	0	0	0	0	0	0	0	0	0	0	0	0	0
23/03/2004 08:00:00	0	0	0	0	0	0	0	0	0	0	0	0	0
23/03/2004 09:00:00	0	0	0	0	0	0	0	0	0	0	0	0	0
23/03/2004 10:00:00	0	0	0	0	0	0	0	0	0	0	0	0	0
23/03/2004 11:00:00	0	0	0	0	0	0	0	0	0	0	0	0	0
23/03/2004 12:00:00	0	0	0	0	0	0	0	0	0	0	0	0	0
23/03/2004 13:00:00	0	0	0	0	0	0	0	0	0	0	0	0	0
23/03/2004 14:00:00	0	0	0	0	0	0	0	0	0	0	0	0	0
23/03/2004 15:00:00	0	0	0	0	0	0	0	0	0	0	0	0	0
23/03/2004 16:00:00	0	0	0	0	0	0	0	0	0	0	0	0	0
23/03/2004 17:00:00	0	0	0	0	0	0	0	0	0	0	0	0	0
23/03/2004 18:00:00	0	0	0	0	0	0	0	0	0	0	0	0	0
23/03/2004 19:00:00	0	0	0	0	0	0	0	0	0	0	0	0	0
23/03/2004 20:00:00	0	0	0	0	0	0	0	0	0	0	0	0	0
23/03/2004 21:00:00	0	0	0	0	0	0	0	0	0	0	0	0	0
23/03/2004 22:00:00	0	0	0	0	0	0	0	0	0	0	0	0	0
23/03/2004 23:00:00	0	0	0	0	0	0	0	0	0	0	0	0	0
24/03/2004 00:00:00	0.408333333	0.183333333	0.6	0.283333333	0.395833333	0.270833333	0.55	0.5375	0.35	0.420833333	0.666666667	0.4125	0.204166667
24/03/2004 01:00:00	0.408333333	0.183333333	0.6	0.283333333	0.395833333	0.270833333	0.55	0.5375	0.35	0.420833333	0.666666667	0.4125	0.204166667
24/03/2004 02:00:00	0.408333333	0.183333333	0.6	0.283333333	0.395833333	0.270833333	0.55	0.5375	0.35	0.420833333	0.666666667	0.4125	0.204166667
24/03/2004 03:00:00	0.408333333	0.183333333	0.6	0.283333333	0.395833333	0.270833333	0.55	0.5375	0.35	0.420833333	0.666666667	0.4125	0.204166667
24/03/2004 04:00:00	0.408333333	0.183333333	0.6	0.283333333	0.395833333	0.270833333	0.55	0.5375	0.35	0.420833333	0.666666667	0.4125	0.204166667
24/03/2004 05:00:00	0.408333333	0.183333333	0.6	0.283333333	0.395833333	0.270833333	0.55	0.5375	0.35	0.420833333	0.666666667	0.4125	0.204166667
24/03/2004 06:00:00	0.408333333	0.183333333	0.6	0.283333333	0.395833333	0.270833333	0.55	0.5375	0.35	0.420833333	0.666666667	0.4125	0.204166667
[truncated: 6,785 more rows]
