# Supplementary material for: Flood Prediction in Ungauged Basins by Physical-Based TOPKAPI Model
Source: Hindawi journal article supplement (doi:10.1155/2019/4795853), 2019-09-05
Supplement: f1 [file 4795853.f1.zip › 4795853.f1/xxdpre_2005.csv]

time	50220150	50220550	50220700	50220850	50221900	50222450	50223650	50223900	50224350	50224650	50224750	50225350	50227850
01/01/2005 00:00:00	0	0	0	0	0	0	0	0	0	0	0	0	0
01/01/2005 01:00:00	0	0	0	0	0	0	0	0	0	0	0	0	0
01/01/2005 02:00:00	0	0	0	0	0	0	0	0	0	0	0	0	0
01/01/2005 03:00:00	0	0	0	0	0	0	0	0	0	0	0	0	0
01/01/2005 04:00:00	0	0	0	0	0	0	0	0	0	0	0	0	0
01/01/2005 05:00:00	0	0	0	0	0	0	0	0	0	0	0	0	0
01/01/2005 06:00:00	0	0	0	0	0	0	0	0	0	0	0	0	0
01/01/2005 07:00:00	0	0	0	0	0	0	0	0	0	0	0	0	0
01/01/2005 08:00:00	0	0	0	0	0	0	0	0	0	0	0	0	0
01/01/2005 09:00:00	0	0	0	0	0	0	0	0	0	0	0	0	0
01/01/2005 10:00:00	0	0	0	0	0	0	0	0	0	0	0	0	0
01/01/2005 11:00:00	0	0	0	0	0	0	0	0	0	0	0	0	0
01/01/2005 12:00:00	0	0	0	0	0	0	0	0	0	0	0	0	0
01/01/2005 13:00:00	0	0	0	0	0	0	0	0	0	0	0	0	0
01/01/2005 14:00:00	0	0	0	0	0	0	0	0	0	0	0	0	0
01/01/2005 15:00:00	0	0	0	0	0	0	0	0	0	0	0	0	0
01/01/2005 16:00:00	0	0	0	0	0	0	0	0	0	0	0	0	0
01/01/2005 17:00:00	0	0	0	0	0	0	0	0	0	0	0	0	0
01/01/2005 18:00:00	0	0	0	0	0	0	0	0	0	0	0	0	0
01/01/2005 19:00:00	0	0	0	0	0	0	0	0	0	0	0	0	0
01/01/2005 20:00:00	0	0	0	0	0	0	0	0	0	0	0	0	0
01/01/2005 21:00:00	0	0	0	0	0	0	0	0	0	0	0	0	0
01/01/2005 22:00:00	0	0	0	0	0	0	0	0	0	0	0	0	0
01/01/2005 23:00:00	0	0	0	0	0	0	0	0	0	0	0	0	0
02/01/2005 00:00:00	0	0	0	0	0	0	0	0	0	0	0	0	0
02/01/2005 01:00:00	0	0	0	0	0	0	0	0	0	0	0	0	0
02/01/2005 02:00:00	0	0	0	0	0	0	0	0	0	0	0	0	0
02/01/2005 03:00:00	0	0	0	0	0	0	0	0	0	0	0	0	0
02/01/2005 04:00:00	0	0	0	0	0	0	0	0	0	0	0	0	0
02/01/2005 05:00:00	0	0	0	0	0	0	0	0	0	0	0	0	0
02/01/2005 06:00:00	0	0	0	0	0	0	0	0	0	0	0	0	0
02/01/2005 07:00:00	0	0	0	0	0	0	0	0	0	0	0	0	0
02/01/2005 08:00:00	0	0	0	0	0	0	0	0	0	0	0	0	0
02/01/2005 09:00:00	0	0	0	0	0	0	0	0	0	0	0	0	0
02/01/2005 10:00:00	0	0	0	0	0	0	0	0	0	0	0	0	0
02/01/2005 11:00:00	0	0	0	0	0	0	0	0	0	0	0	0	0
02/01/2005 12:00:00	0	0	0	0	0	0	0	0	0	0	0	0	0
02/01/2005 13:00:00	0	0	0	0	0	0	0	0	0	0	0	0	0
02/01/2005 14:00:00	0	0	0	0	0	0	0	0	0	0	0	0	0
02/01/2005 15:00:00	0	0	0	0	0	0	0	0	0	0	0	0	0
02/01/2005 16:00:00	0	0	0	0	0	0	0	0	0	0	0	0	0
02/01/2005 17:00:00	0	0	0	0	0	0	0	0	0	0	0	0	0
02/01/2005 18:00:00	0	0	0	0	0	0	0	0	0	0	0	0	0
02/01/2005 19:00:00	0	0	0	0	0	0	0	0	0	0	0	0	0
02/01/2005 20:00:00	0	0	0	0	0	0	0	0	0	0	0	0	0
02/01/2005 21:00:00	0	0	0	0	0	0	0	0	0	0	0	0	0
02/01/2005 22:00:00	0	0	0	0	0	0	0	0	0	0	0	0	0
02/01/2005 23:00:00	0	0	0	0	0	0	0	0	0	0	0	0	0
03/01/2005 00:00:00	0	0	0	0	0	0	0	0	0	0	0	0	0
03/01/2005 01:00:00	0	0	0	0	0	0	0	0	0	0	0	0	0
03/01/2005 02:00:00	0	0	0	0	0	0	0	0	0	0	0	0	0
03/01/2005 03:00:00	0	0	0	0	0	0	0	0	0	0	0	0	0
03/01/2005 04:00:00	0	0	0	0	0	0	0	0	0	0	0	0	0
03/01/2005 05:00:00	0	0	0	0	0	0	0	0	0	0	0	0	0
03/01/2005 06:00:00	0	0	0	0	0	0	0	0	0	0	0	0	0
03/01/2005 07:00:00	0	0	0	0	0	0	0	0	0	0	0	0	0
03/01/2005 08:00:00	0	0	0	0	0	0	0	0	0	0	0	0	0
03/01/2005 09:00:00	0	0	0	0	0	0	0	0	0	0	0	0	0
03/01/2005 10:00:00	0	0	0	0	0	0	0	0	0	0	0	0	0
03/01/2005 11:00:00	0	0	0	0	0	0	0	0	0	0	0	0	0
03/01/2005 12:00:00	0	0	0	0	0	0	0	0	0	0	0	0	0
03/01/2005 13:00:00	0	0	0	0	0	0	0	0	0	0	0	0	0
03/01/2005 14:00:00	0	0	0	0	0	0	0	0	0	0	0	0	0
03/01/2005 15:00:00	0	0	0	0	0	0	0	0	0	0	0	0	0
03/01/2005 16:00:00	0	0	0	0	0	0	0	0	0	0	0	0	0
03/01/2005 17:00:00	0	0	0	0	0	0	0	0	0	0	0	0	0
03/01/2005 18:00:00	0	0	0	0	0	0	0	0	0	0	0	0	0
03/01/2005 19:00:00	0	0	0	0	0	0	0	0	0	0	0	0	0
03/01/2005 20:00:00	0	0	0	0	0	0	0	0	0	0	0	0	0
03/01/2005 21:00:00	0	0	0	0	0	0	0	0	0	0	0	0	0
03/01/2005 22:00:00	0	0	0	0	0	0	0	0	0	0	0	0	0
03/01/2005 23:00:00	0	0	0	0	0	0	0	0	0	0	0	0	0
04/01/2005 00:00:00	0	0	0	0	0	0	0	0	0	0	0	0	0
04/01/2005 01:00:00	0	0	0	0	0	0	0	0	0	0	0	0	0
04/01/2005 02:00:00	0	0	0	0	0	0	0	0	0	0	0	0	0
04/01/2005 03:00:00	0	0	0	0	0	0	0	0	0	0	0	0	0
04/01/2005 04:00:00	0	0	0	0	0	0	0	0	0	0	0	0	0
04/01/2005 05:00:00	0	0	0	0	0	0	0	0	0	0	0	0	0
04/01/2005 06:00:00	0	0	0	0	0	0	0	0	0	0	0	0	0
04/01/2005 07:00:00	0	0	0	0	0	0	0	0	0	0	0	0	0
04/01/2005 08:00:00	0	0	0	0	0	0	0	0	0	0	0	0	0
04/01/2005 09:00:00	0	0	0	0	0	0	0	0	0	0	0	0	0
04/01/2005 10:00:00	0	0	0	0	0	0	0	0	0	0	0	0	0
04/01/2005 11:00:00	0	0	0	0	0	0	0	0	0	0	0	0	0
04/01/2005 12:00:00	0	0	0	0	0	0	0	0	0	0	0	0	0
04/01/2005 13:00:00	0	0	0	0	0	0	0	0	0	0	0	0	0
04/01/2005 14:00:00	0	0	0	0	0	0	0	0	0	0	0	0	0
04/01/2005 15:00:00	0	0	0	0	0	0	0	0	0	0	0	0	0
04/01/2005 16:00:00	0	0	0	0	0	0	0	0	0	0	0	0	0
04/01/2005 17:00:00	0	0	0	0	0	0	0	0	0	0	0	0	0
04/01/2005 18:00:00	0	0	0	0	0	0	0	0	0	0	0	0	0
04/01/2005 19:00:00	0	0	0	0	0	0	0	0	0	0	0	0	0
04/01/2005 20:00:00	0	0	0	0	0	0	0	0	0	0	0	0	0
04/01/2005 21:00:00	0	0	0	0	0	0	0	0	0	0	0	0	0
04/01/2005 22:00:00	0	0	0	0	0	0	0	0	0	0	0	0	0
04/01/2005 23:00:00	0	0	0	0	0	0	0	0	0	0	0	0	0
05/01/2005 00:00:00	0	0	0	0	0	0	0	0	0	0	0	0	0
05/01/2005 01:00:00	0	0	0	0	0	0	0	0	0	0	0	0	0
05/01/2005 02:00:00	0	0	0	0	0	0	0	0	0	0	0	0	0
05/01/2005 03:00:00	0	0	0	0	0	0	0	0	0	0	0	0	0
05/01/2005 04:00:00	0	0	0	0	0	0	0	0	0	0	0	0	0
05/01/2005 05:00:00	0	0	0	0	0	0	0	0	0	0	0	0	0
05/01/2005 06:00:00	0	0	0	0	0	0	0	0	0	0	0	0	0
05/01/2005 07:00:00	0	0	0	0	0	0	0	0	0	0	0	0	0
05/01/2005 08:00:00	0	0	0	0	0	0	0	0	0	0	0	0	0
05/01/2005 09:00:00	0	0	0	0	0	0	0	0	0	0	0	0	0
05/01/2005 10:00:00	0	0	0	0	0	0	0	0	0	0	0	0	0
05/01/2005 11:00:00	0	0	0	0	0	0	0	0	0	0	0	0	0
05/01/2005 12:00:00	0	0	0	0	0	0	0	0	0	0	0	0	0
05/01/2005 13:00:00	0	0	0	0	0	0	0	0	0	0	0	0	0
05/01/2005 14:00:00	0	0	0	0	0	0	0	0	0	0	0	0	0
05/01/2005 15:00:00	0	0	0	0	0	0	0	0	0	0	0	0	0
05/01/2005 16:00:00	0	0	0	0	0	0	0	0	0	0	0	0	0
05/01/2005 17:00:00	0	0	0	0	0	0	0	0	0	0	0	0	0
05/01/2005 18:00:00	0	0	0	0	0	0	0	0	0	0	0	0	0
05/01/2005 19:00:00	0	0	0	0	0	0	0	0	0	0	0	0	0
05/01/2005 20:00:00	0	0	0	0	0	0	0	0	0	0	0	0	0
05/01/2005 21:00:00	0	0	0	0	0	0	0	0	0	0	0	0	0
05/01/2005 22:00:00	0	0	0	0	0	0	0	0	0	0	0	0	0
05/01/2005 23:00:00	0	0	0	0	0	0	0	0	0	0	0	0	0
06/01/2005 00:00:00	0	0	0	0	0	0	0	0	0	0	0	0	0
06/01/2005 01:00:00	0	0	0	0	0	0	0	0	0	0	0	0	0
06/01/2005 02:00:00	0	0	0	0	0	0	0	0	0	0	0	0	0
06/01/2005 03:00:00	0	0	0	0	0	0	0	0	0	0	0	0	0
06/01/2005 04:00:00	0	0	0	0	0	0	0	0	0	0	0	0	0
06/01/2005 05:00:00	0	0	0	0	0	0	0	0	0	0	0	0	0
06/01/2005 06:00:00	0	0	0	0	0	0	0	0	0	0	0	0	0
06/01/2005 07:00:00	0	0	0	0	0	0	0	0	0	0	0	0	0
06/01/2005 08:00:00	0	0	0	0	0	0	0	0	0	0	0	0	0
06/01/2005 09:00:00	0	0	0	0	0	0	0	0	0	0	0	0	0
06/01/2005 10:00:00	0	0	0	0	0	0	0	0	0	0	0	0	0
06/01/2005 11:00:00	0	0	0	0	0	0	0	0	0	0	0	0	0
06/01/2005 12:00:00	0	0	0	0	0	0	0	0	0	0	0	0	0
06/01/2005 13:00:00	0	0	0	0	0	0	0	0	0	0	0	0	0
06/01/2005 14:00:00	0	0	0	0	0	0	0	0	0	0	0	0	0
06/01/2005 15:00:00	0	0	0	0	0	0	0	0	0	0	0	0	0
06/01/2005 16:00:00	0	0	0	0	0	0	0	0	0	0	0	0	0
06/01/2005 17:00:00	0	0	0	0	0	0	0	0	0	0	0	0	0
06/01/2005 18:00:00	0	0	0	0	0	0	0	0	0	0	0	0	0
06/01/2005 19:00:00	0	0	0	0	0	0	0	0	0	0	0	0	0
06/01/2005 20:00:00	0	0	0	0	0	0	0	0	0	0	0	0	0
06/01/2005 21:00:00	0	0	0	0	0	0	0	0	0	0	0	0	0
06/01/2005 22:00:00	0	0	0	0	0	0	0	0	0	0	0	0	0
06/01/2005 23:00:00	0	0	0	0	0	0	0	0	0	0	0	0	0
07/01/2005 00:00:00	0	0	0	0	0	0	0	0	0	0	0	0	0
07/01/2005 01:00:00	0	0	0	0	0	0	0	0	0	0	0	0	0
07/01/2005 02:00:00	0	0	0	0	0	0	0	0	0	0	0	0	0
07/01/2005 03:00:00	0	0	0	0	0	0	0	0	0	0	0	0	0
07/01/2005 04:00:00	0	0	0	0	0	0	0	0	0	0	0	0	0
07/01/2005 05:00:00	0	0	0	0	0	0	0	0	0	0	0	0	0
07/01/2005 06:00:00	0	0	0	0	0	0	0	0	0	0	0	0	0
07/01/2005 07:00:00	0	0	0	0	0	0	0	0	0	0	0	0	0
07/01/2005 08:00:00	0	0	0	0	0	0	0	0	0	0	0	0	0
07/01/2005 09:00:00	0	0	0	0	0	0	0	0	0	0	0	0	0
07/01/2005 10:00:00	0	0	0	0	0	0	0	0	0	0	0	0	0
07/01/2005 11:00:00	0	0	0	0	0	0	0	0	0	0	0	0	0
07/01/2005 12:00:00	0	0	0	0	0	0	0	0	0	0	0	0	0
07/01/2005 13:00:00	0	0	0	0	0	0	0	0	0	0	0	0	0
07/01/2005 14:00:00	0	0	0	0	0	0	0	0	0	0	0	0	0
07/01/2005 15:00:00	0	0	0	0	0	0	0	0	0	0	0	0	0
07/01/2005 16:00:00	0	0	0	0	0	0	0	0	0	0	0	0	0
07/01/2005 17:00:00	0	0	0	0	0	0	0	0	0	0	0	0	0
07/01/2005 18:00:00	0	0	0	0	0	0	0	0	0	0	0	0	0
07/01/2005 19:00:00	0	0	0	0	0	0	0	0	0	0	0	0	0
07/01/2005 20:00:00	0	0	0	0	0	0	0	0	0	0	0	0	0
07/01/2005 21:00:00	0	0	0	0	0	0	0	0	0	0	0	0	0
07/01/2005 22:00:00	0	0	0	0	0	0	0	0	0	0	0	0	0
07/01/2005 23:00:00	0	0	0	0	0	0	0	0	0	0	0	0	0
08/01/2005 00:00:00	0	0	0	0	0	0	0	0	0	0	0	0	0
08/01/2005 01:00:00	0	0	0	0	0	0	0	0	0	0	0	0	0
08/01/2005 02:00:00	0	0	0	0	0	0	0	0	0	0	0	0	0
08/01/2005 03:00:00	0	0	0	0	0	0	0	0	0	0	0	0	0
08/01/2005 04:00:00	0	0	0	0	0	0	0	0	0	0	0	0	0
08/01/2005 05:00:00	0	0	0	0	0	0	0	0	0	0	0	0	0
08/01/2005 06:00:00	0	0	0	0	0	0	0	0	0	0	0	0	0
08/01/2005 07:00:00	0	0	0	0	0	0	0	0	0	0	0	0	0
08/01/2005 08:00:00	0	0	0	0	0	0	0	0	0	0	0	0	0
08/01/2005 09:00:00	0	0	0	0	0	0	0	0	0	0	0	0	0
08/01/2005 10:00:00	0	0	0	0	0	0	0	0	0	0	0	0	0
08/01/2005 11:00:00	0	0	0	0	0	0	0	0	0	0	0	0	0
08/01/2005 12:00:00	0	0	0	0	0	0	0	0	0	0	0	0	0
08/01/2005 13:00:00	0	0	0	0	0	0	0	0	0	0	0	0	0
08/01/2005 14:00:00	0	0	0	0	0	0	0	0	0	0	0	0	0
08/01/2005 15:00:00	0	0	0	0	0	0	0	0	0	0	0	0	0
08/01/2005 16:00:00	0	0	0	0	0	0	0	0	0	0	0	0	0
08/01/2005 17:00:00	0	0	0	0	0	0	0	0	0	0	0	0	0
08/01/2005 18:00:00	0	0	0	0	0	0	0	0	0	0	0	0	0
08/01/2005 19:00:00	0	0	0	0	0	0	0	0	0	0	0	0	0
08/01/2005 20:00:00	0	0	0	0	0	0	0	0	0	0	0	0	0
08/01/2005 21:00:00	0	0	0	0	0	0	0	0	0	0	0	0	0
08/01/2005 22:00:00	0	0	0	0	0	0	0	0	0	0	0	0	0
08/01/2005 23:00:00	0	0	0	0	0	0	0	0	0	0	0	0	0
09/01/2005 00:00:00	0	0	0	0	0	0	0	0	0	0	0	0	0
09/01/2005 01:00:00	0	0	0	0	0	0	0	0	0	0	0	0	0
09/01/2005 02:00:00	0	0	0	0	0	0	0	0	0	0	0	0	0
09/01/2005 03:00:00	0	0	0	0	0	0	0	0	0	0	0	0	0
09/01/2005 04:00:00	0	0	0	0	0	0	0	0	0	0	0	0	0
09/01/2005 05:00:00	0	0	0	0	0	0	0	0	0	0	0	0	0
09/01/2005 06:00:00	0	0	0	0	0	0	0	0	0	0	0	0	0
09/01/2005 07:00:00	0	0	0	0	0	0	0	0	0	0	0	0	0
09/01/2005 08:00:00	0	0	0	0	0	0	0	0	0	0	0	0	0
09/01/2005 09:00:00	0	0	0	0	0	0	0	0	0	0	0	0	0
09/01/2005 10:00:00	0	0	0	0	0	0	0	0	0	0	0	0	0
09/01/2005 11:00:00	0	0	0	0	0	0	0	0	0	0	0	0	0
09/01/2005 12:00:00	0	0	0	0	0	0	0	0	0	0	0	0	0
09/01/2005 13:00:00	0	0	0	0	0	0	0	0	0	0	0	0	0
09/01/2005 14:00:00	0	0	0	0	0	0	0	0	0	0	0	0	0
09/01/2005 15:00:00	0	0	0	0	0	0	0	0	0	0	0	0	0
09/01/2005 16:00:00	0	0	0	0	0	0	0	0	0	0	0	0	0
09/01/2005 17:00:00	0	0	0	0	0	0	0	0	0	0	0	0	0
09/01/2005 18:00:00	0	0	0	0	0	0	0	0	0	0	0	0	0
09/01/2005 19:00:00	0	0	0	0	0	0	0	0	0	0	0	0	0
09/01/2005 20:00:00	0	0	0	0	0	0	0	0	0	0	0	0	0
09/01/2005 21:00:00	0	0	0	0	0	0	0	0	0	0	0	0	0
09/01/2005 22:00:00	0	0	0	0	0	0	0	0	0	0	0	0	0
09/01/2005 23:00:00	0	0	0	0	0	0	0	0	0	0	0	0	0
10/01/2005 00:00:00	0	0	0	0	0	0	0	0	0	0	0	0	0
10/01/2005 01:00:00	0	0	0	0	0	0	0	0	0	0	0	0	0
10/01/2005 02:00:00	0	0	0	0	0	0	0	0	0	0	0	0	0
10/01/2005 03:00:00	0	0	0	0	0	0	0	0	0	0	0	0	0
10/01/2005 04:00:00	0	0	0	0	0	0	0	0	0	0	0	0	0
10/01/2005 05:00:00	0	0	0	0	0	0	0	0	0	0	0	0	0
10/01/2005 06:00:00	0	0	0	0	0	0	0	0	0	0	0	0	0
10/01/2005 07:00:00	0	0	0	0	0	0	0	0	0	0	0	0	0
10/01/2005 08:00:00	0	0	0	0	0	0	0	0	0	0	0	0	0
10/01/2005 09:00:00	0	0	0	0	0	0	0	0	0	0	0	0	0
10/01/2005 10:00:00	0	0	0	0	0	0	0	0	0	0	0	0	0
10/01/2005 11:00:00	0	0	0	0	0	0	0	0	0	0	0	0	0
10/01/2005 12:00:00	0	0	0	0	0	0	0	0	0	0	0	0	0
10/01/2005 13:00:00	0	0	0	0	0	0	0	0	0	0	0	0	0
10/01/2005 14:00:00	0	0	0	0	0	0	0	0	0	0	0	0	0
10/01/2005 15:00:00	0	0	0	0	0	0	0	0	0	0	0	0	0
10/01/2005 16:00:00	0	0	0	0	0	0	0	0	0	0	0	0	0
10/01/2005 17:00:00	0	0	0	0	0	0	0	0	0	0	0	0	0
10/01/2005 18:00:00	0	0	0	0	0	0	0	0	0	0	0	0	0
10/01/2005 19:00:00	0	0	0	0	0	0	0	0	0	0	0	0	0
10/01/2005 20:00:00	0	0	0	0	0	0	0	0	0	0	0	0	0
10/01/2005 21:00:00	0	0	0	0	0	0	0	0	0	0	0	0	0
10/01/2005 22:00:00	0	0	0	0	0	0	0	0	0	0	0	0	0
10/01/2005 23:00:00	0	0	0	0	0	0	0	0	0	0	0	0	0
11/01/2005 00:00:00	0	0	0	0	0	0	0	0	0	0	0	0	0
11/01/2005 01:00:00	0	0	0	0	0	0	0	0	0	0	0	0	0
11/01/2005 02:00:00	0	0	0	0	0	0	0	0	0	0	0	0	0
11/01/2005 03:00:00	0	0	0	0	0	0	0	0	0	0	0	0	0
11/01/2005 04:00:00	0	0	0	0	0	0	0	0	0	0	0	0	0
11/01/2005 05:00:00	0	0	0	0	0	0	0	0	0	0	0	0	0
11/01/2005 06:00:00	0	0	0	0	0	0	0	0	0	0	0	0	0
11/01/2005 07:00:00	0	0	0	0	0	0	0	0	0	0	0	0	0
11/01/2005 08:00:00	0	0	0	0	0	0	0	0	0	0	0	0	0
11/01/2005 09:00:00	0	0	0	0	0	0	0	0	0	0	0	0	0
11/01/2005 10:00:00	0	0	0	0	0	0	0	0	0	0	0	0	0
11/01/2005 11:00:00	0	0	0	0	0	0	0	0	0	0	0	0	0
11/01/2005 12:00:00	0	0	0	0	0	0	0	0	0	0	0	0	0
11/01/2005 13:00:00	0	0	0	0	0	0	0	0	0	0	0	0	0
11/01/2005 14:00:00	0	0	0	0	0	0	0	0	0	0	0	0	0
11/01/2005 15:00:00	0	0	0	0	0	0	0	0	0	0	0	0	0
11/01/2005 16:00:00	0	0	0	0	0	0	0	0	0	0	0	0	0
11/01/2005 17:00:00	0	0	0	0	0	0	0	0	0	0	0	0	0
11/01/2005 18:00:00	0	0	0	0	0	0	0	0	0	0	0	0	0
11/01/2005 19:00:00	0	0	0	0	0	0	0	0	0	0	0	0	0
11/01/2005 20:00:00	0	0	0	0	0	0	0	0	0	0	0	0	0
11/01/2005 21:00:00	0	0	0	0	0	0	0	0	0	0	0	0	0
11/01/2005 22:00:00	0	0	0	0	0	0	0	0	0	0	0	0	0
11/01/2005 23:00:00	0	0	0	0	0	0	0	0	0	0	0	0	0
12/01/2005 00:00:00	0	0	0	0	0	0	0	0	0	0	0	0	0
12/01/2005 01:00:00	0	0	0	0	0	0	0	0	0	0	0	0	0
12/01/2005 02:00:00	0	0	0	0	0	0	0	0	0	0	0	0	0
12/01/2005 03:00:00	0	0	0	0	0	0	0	0	0	0	0	0	0
12/01/2005 04:00:00	0	0	0	0	0	0	0	0	0	0	0	0	0
12/01/2005 05:00:00	0	0	0	0	0	0	0	0	0	0	0	0	0
12/01/2005 06:00:00	0	0	0	0	0	0	0	0	0	0	0	0	0
12/01/2005 07:00:00	0	0	0	0	0	0	0	0	0	0	0	0	0
12/01/2005 08:00:00	0	0	0	0	0	0	0	0	0	0	0	0	0
12/01/2005 09:00:00	0	0	0	0	0	0	0	0	0	0	0	0	0
12/01/2005 10:00:00	0	0	0	0	0	0	0	0	0	0	0	0	0
12/01/2005 11:00:00	0	0	0	0	0	0	0	0	0	0	0	0	0
12/01/2005 12:00:00	0	0	0	0	0	0	0	0	0	0	0	0	0
12/01/2005 13:00:00	0	0	0	0	0	0	0	0	0	0	0	0	0
12/01/2005 14:00:00	0	0	0	0	0	0	0	0	0	0	0	0	0
12/01/2005 15:00:00	0	0	0	0	0	0	0	0	0	0	0	0	0
12/01/2005 16:00:00	0	0	0	0	0	0	0	0	0	0	0	0	0
12/01/2005 17:00:00	0	0	0	0	0	0	0	0	0	0	0	0	0
12/01/2005 18:00:00	0	0	0	0	0	0	0	0	0	0	0	0	0
12/01/2005 19:00:00	0	0	0	0	0	0	0	0	0	0	0	0	0
12/01/2005 20:00:00	0	0	0	0	0	0	0	0	0	0	0	0	0
12/01/2005 21:00:00	0	0	0	0	0	0	0	0	0	0	0	0	0
12/01/2005 22:00:00	0	0	0	0	0	0	0	0	0	0	0	0	0
12/01/2005 23:00:00	0	0	0	0	0	0	0	0	0	0	0	0	0
13/01/2005 00:00:00	0	0	0	0	0	0	0	0	0	0	0	0	0
13/01/2005 01:00:00	0	0	0	0	0	0	0	0	0	0	0	0	0
13/01/2005 02:00:00	0	0	0	0	0	0	0	0	0	0	0	0	0
13/01/2005 03:00:00	0	0	0	0	0	0	0	0	0	0	0	0	0
13/01/2005 04:00:00	0	0	0	0	0	0	0	0	0	0	0	0	0
13/01/2005 05:00:00	0	0	0	0	0	0	0	0	0	0	0	0	0
13/01/2005 06:00:00	0	0	0	0	0	0	0	0	0	0	0	0	0
13/01/2005 07:00:00	0	0	0	0	0	0	0	0	0	0	0	0	0
13/01/2005 08:00:00	0	0	0	0	0	0	0	0	0	0	0	0	0
13/01/2005 09:00:00	0	0	0	0	0	0	0	0	0	0	0	0	0
13/01/2005 10:00:00	0	0	0	0	0	0	0	0	0	0	0	0	0
13/01/2005 11:00:00	0	0	0	0	0	0	0	0	0	0	0	0	0
13/01/2005 12:00:00	0	0	0	0	0	0	0	0	0	0	0	0	0
13/01/2005 13:00:00	0	0	0	0	0	0	0	0	0	0	0	0	0
13/01/2005 14:00:00	0	0	0	0	0	0	0	0	0	0	0	0	0
13/01/2005 15:00:00	0	0	0	0	0	0	0	0	0	0	0	0	0
13/01/2005 16:00:00	0	0	0	0	0	0	0	0	0	0	0	0	0
13/01/2005 17:00:00	0	0	0	0	0	0	0	0	0	0	0	0	0
13/01/2005 18:00:00	0	0	0	0	0	0	0	0	0	0	0	0	0
13/01/2005 19:00:00	0	0	0	0	0	0	0	0	0	0	0	0	0
13/01/2005 20:00:00	0	0	0	0	0	0	0	0	0	0	0	0	0
13/01/2005 21:00:00	0	0	0	0	0	0	0	0	0	0	0	0	0
13/01/2005 22:00:00	0	0	0	0	0	0	0	0	0	0	0	0	0
13/01/2005 23:00:00	0	0	0	0	0	0	0	0	0	0	0	0	0
14/01/2005 00:00:00	0	0	0	0	0	0	0	0	0	0	0	0	0
14/01/2005 01:00:00	0	0	0	0	0	0	0	0	0	0	0	0	0
14/01/2005 02:00:00	0	0	0	0	0	0	0	0	0	0	0	0	0
14/01/2005 03:00:00	0	0	0	0	0	0	0	0	0	0	0	0	0
14/01/2005 04:00:00	0	0	0	0	0	0	0	0	0	0	0	0	0
14/01/2005 05:00:00	0	0	0	0	0	0	0	0	0	0	0	0	0
14/01/2005 06:00:00	0	0	0	0	0	0	0	0	0	0	0	0	0
14/01/2005 07:00:00	0	0	0	0	0	0	0	0	0	0	0	0	0
14/01/2005 08:00:00	0	0	0	0	0	0	0	0	0	0	0	0	0
14/01/2005 09:00:00	0	0	0	0	0	0	0	0	0	0	0	0	0
14/01/2005 10:00:00	0	0	0	0	0	0	0	0	0	0	0	0	0
14/01/2005 11:00:00	0	0	0	0	0	0	0	0	0	0	0	0	0
14/01/2005 12:00:00	0	0	0	0	0	0	0	0	0	0	0	0	0
14/01/2005 13:00:00	0	0	0	0	0	0	0	0	0	0	0	0	0
14/01/2005 14:00:00	0	0	0	0	0	0	0	0	0	0	0	0	0
14/01/2005 15:00:00	0	0	0	0	0	0	0	0	0	0	0	0	0
14/01/2005 16:00:00	0	0	0	0	0	0	0	0	0	0	0	0	0
14/01/2005 17:00:00	0	0	0	0	0	0	0	0	0	0	0	0	0
14/01/2005 18:00:00	0	0	0	0	0	0	0	0	0	0	0	0	0
14/01/2005 19:00:00	0	0	0	0	0	0	0	0	0	0	0	0	0
14/01/2005 20:00:00	0	0	0	0	0	0	0	0	0	0	0	0	0
14/01/2005 21:00:00	0	0	0	0	0	0	0	0	0	0	0	0	0
14/01/2005 22:00:00	0	0	0	0	0	0	0	0	0	0	0	0	0
14/01/2005 23:00:00	0	0	0	0	0	0	0	0	0	0	0	0	0
15/01/2005 00:00:00	0	0	0	0	0	0	0	0	0	0	0	0	0
15/01/2005 01:00:00	0	0	0	0	0	0	0	0	0	0	0	0	0
15/01/2005 02:00:00	0	0	0	0	0	0	0	0	0	0	0	0	0
15/01/2005 03:00:00	0	0	0	0	0	0	0	0	0	0	0	0	0
15/01/2005 04:00:00	0	0	0	0	0	0	0	0	0	0	0	0	0
15/01/2005 05:00:00	0	0	0	0	0	0	0	0	0	0	0	0	0
15/01/2005 06:00:00	0	0	0	0	0	0	0	0	0	0	0	0	0
15/01/2005 07:00:00	0	0	0	0	0	0	0	0	0	0	0	0	0
15/01/2005 08:00:00	0	0	0	0	0	0	0	0	0	0	0	0	0
15/01/2005 09:00:00	0	0	0	0	0	0	0	0	0	0	0	0	0
15/01/2005 10:00:00	0	0	0	0	0	0	0	0	0	0	0	0	0
15/01/2005 11:00:00	0	0	0	0	0	0	0	0	0	0	0	0	0
15/01/2005 12:00:00	0	0	0	0	0	0	0	0	0	0	0	0	0
15/01/2005 13:00:00	0	0	0	0	0	0	0	0	0	0	0	0	0
15/01/2005 14:00:00	0	0	0	0	0	0	0	0	0	0	0	0	0
15/01/2005 15:00:00	0	0	0	0	0	0	0	0	0	0	0	0	0
15/01/2005 16:00:00	0	0	0	0	0	0	0	0	0	0	0	0	0
15/01/2005 17:00:00	0	0	0	0	0	0	0	0	0	0	0	0	0
15/01/2005 18:00:00	0	0	0	0	0	0	0	0	0	0	0	0	0
15/01/2005 19:00:00	0	0	0	0	0	0	0	0	0	0	0	0	0
15/01/2005 20:00:00	0	0	0	0	0	0	0	0	0	0	0	0	0
15/01/2005 21:00:00	0	0	0	0	0	0	0	0	0	0	0	0	0
15/01/2005 22:00:00	0	0	0	0	0	0	0	0	0	0	0	0	0
15/01/2005 23:00:00	0	0	0	0	0	0	0	0	0	0	0	0	0
16/01/2005 00:00:00	0	0	0	0	0	0	0	0	0	0	0	0	0
16/01/2005 01:00:00	0	0	0	0	0	0	0	0	0	0	0	0	0
16/01/2005 02:00:00	0	0	0	0	0	0	0	0	0	0	0	0	0
16/01/2005 03:00:00	0	0	0	0	0	0	0	0	0	0	0	0	0
16/01/2005 04:00:00	0	0	0	0	0	0	0	0	0	0	0	0	0
16/01/2005 05:00:00	0	0	0	0	0	0	0	0	0	0	0	0	0
16/01/2005 06:00:00	0	0	0	0	0	0	0	0	0	0	0	0	0
16/01/2005 07:00:00	0	0	0	0	0	0	0	0	0	0	0	0	0
16/01/2005 08:00:00	0	0	0	0	0	0	0	0	0	0	0	0	0
16/01/2005 09:00:00	0	0	0	0	0	0	0	0	0	0	0	0	0
16/01/2005 10:00:00	0	0	0	0	0	0	0	0	0	0	0	0	0
16/01/2005 11:00:00	0	0	0	0	0	0	0	0	0	0	0	0	0
16/01/2005 12:00:00	0	0	0	0	0	0	0	0	0	0	0	0	0
16/01/2005 13:00:00	0	0	0	0	0	0	0	0	0	0	0	0	0
16/01/2005 14:00:00	0	0	0	0	0	0	0	0	0	0	0	0	0
16/01/2005 15:00:00	0	0	0	0	0	0	0	0	0	0	0	0	0
16/01/2005 16:00:00	0	0	0	0	0	0	0	0	0	0	0	0	0
16/01/2005 17:00:00	0	0	0	0	0	0	0	0	0	0	0	0	0
16/01/2005 18:00:00	0	0	0	0	0	0	0	0	0	0	0	0	0
16/01/2005 19:00:00	0	0	0	0	0	0	0	0	0	0	0	0	0
16/01/2005 20:00:00	0	0	0	0	0	0	0	0	0	0	0	0	0
16/01/2005 21:00:00	0	0	0	0	0	0	0	0	0	0	0	0	0
16/01/2005 22:00:00	0	0	0	0	0	0	0	0	0	0	0	0	0
16/01/2005 23:00:00	0	0	0	0	0	0	0	0	0	0	0	0	0
17/01/2005 00:00:00	0	0	0	0	0	0	0	0	0	0	0	0	0
17/01/2005 01:00:00	0	0	0	0	0	0	0	0	0	0	0	0	0
17/01/2005 02:00:00	0	0	0	0	0	0	0	0	0	0	0	0	0
17/01/2005 03:00:00	0	0	0	0	0	0	0	0	0	0	0	0	0
17/01/2005 04:00:00	0	0	0	0	0	0	0	0	0	0	0	0	0
17/01/2005 05:00:00	0	0	0	0	0	0	0	0	0	0	0	0	0
17/01/2005 06:00:00	0	0	0	0	0	0	0	0	0	0	0	0	0
17/01/2005 07:00:00	0	0	0	0	0	0	0	0	0	0	0	0	0
17/01/2005 08:00:00	0	0	0	0	0	0	0	0	0	0	0	0	0
17/01/2005 09:00:00	0	0	0	0	0	0	0	0	0	0	0	0	0
17/01/2005 10:00:00	0	0	0	0	0	0	0	0	0	0	0	0	0
17/01/2005 11:00:00	0	0	0	0	0	0	0	0	0	0	0	0	0
17/01/2005 12:00:00	0	0	0	0	0	0	0	0	0	0	0	0	0
17/01/2005 13:00:00	0	0	0	0	0	0	0	0	0	0	0	0	0
17/01/2005 14:00:00	0	0	0	0	0	0	0	0	0	0	0	0	0
17/01/2005 15:00:00	0	0	0	0	0	0	0	0	0	0	0	0	0
17/01/2005 16:00:00	0	0	0	0	0	0	0	0	0	0	0	0	0
17/01/2005 17:00:00	0	0	0	0	0	0	0	0	0	0	0	0	0
17/01/2005 18:00:00	0	0	0	0	0	0	0	0	0	0	0	0	0
17/01/2005 19:00:00	0	0	0	0	0	0	0	0	0	0	0	0	0
17/01/2005 20:00:00	0	0	0	0	0	0	0	0	0	0	0	0	0
17/01/2005 21:00:00	0	0	0	0	0	0	0	0	0	0	0	0	0
17/01/2005 22:00:00	0	0	0	0	0	0	0	0	0	0	0	0	0
17/01/2005 23:00:00	0	0	0	0	0	0	0	0	0	0	0	0	0
18/01/2005 00:00:00	0	0	0	0	0	0	0	0	0	0	0	0	0
18/01/2005 01:00:00	0	0	0	0	0	0	0	0	0	0	0	0	0
18/01/2005 02:00:00	0	0	0	0	0	0	0	0	0	0	0	0	0
18/01/2005 03:00:00	0	0	0	0	0	0	0	0	0	0	0	0	0
18/01/2005 04:00:00	0	0	0	0	0	0	0	0	0	0	0	0	0
18/01/2005 05:00:00	0	0	0	0	0	0	0	0	0	0	0	0	0
18/01/2005 06:00:00	0	0	0	0	0	0	0	0	0	0	0	0	0
18/01/2005 07:00:00	0	0	0	0	0	0	0	0	0	0	0	0	0
18/01/2005 08:00:00	0	0	0	0	0	0	0	0	0	0	0	0	0
18/01/2005 09:00:00	0	0	0	0	0	0	0	0	0	0	0	0	0
18/01/2005 10:00:00	0	0	0	0	0	0	0	0	0	0	0	0	0
18/01/2005 11:00:00	0	0	0	0	0	0	0	0	0	0	0	0	0
18/01/2005 12:00:00	0	0	0	0	0	0	0	0	0	0	0	0	0
18/01/2005 13:00:00	0	0	0	0	0	0	0	0	0	0	0	0	0
18/01/2005 14:00:00	0	0	0	0	0	0	0	0	0	0	0	0	0
18/01/2005 15:00:00	0	0	0	0	0	0	0	0	0	0	0	0	0
18/01/2005 16:00:00	0	0	0	0	0	0	0	0	0	0	0	0	0
18/01/2005 17:00:00	0	0	0	0	0	0	0	0	0	0	0	0	0
18/01/2005 18:00:00	0	0	0	0	0	0	0	0	0	0	0	0	0
18/01/2005 19:00:00	0	0	0	0	0	0	0	0	0	0	0	0	0
18/01/2005 20:00:00	0	0	0	0	0	0	0	0	0	0	0	0	0
18/01/2005 21:00:00	0	0	0	0	0	0	0	0	0	0	0	0	0
18/01/2005 22:00:00	0	0	0	0	0	0	0	0	0	0	0	0	0
18/01/2005 23:00:00	0	0	0	0	0	0	0	0	0	0	0	0	0
19/01/2005 00:00:00	0	0	0	0	0	0	0	0	0	0	0	0	0
19/01/2005 01:00:00	0	0	0	0	0	0	0	0	0	0	0	0	0
19/01/2005 02:00:00	0	0	0	0	0	0	0	0	0	0	0	0	0
19/01/2005 03:00:00	0	0	0	0	0	0	0	0	0	0	0	0	0
19/01/2005 04:00:00	0	0	0	0	0	0	0	0	0	0	0	0	0
19/01/2005 05:00:00	0	0	0	0	0	0	0	0	0	0	0	0	0
19/01/2005 06:00:00	0	0	0	0	0	0	0	0	0	0	0	0	0
19/01/2005 07:00:00	0	0	0	0	0	0	0	0	0	0	0	0	0
19/01/2005 08:00:00	0	0	0	0	0	0	0	0	0	0	0	0	0
19/01/2005 09:00:00	0	0	0	0	0	0	0	0	0	0	0	0	0
19/01/2005 10:00:00	0	0	0	0	0	0	0	0	0	0	0	0	0
19/01/2005 11:00:00	0	0	0	0	0	0	0	0	0	0	0	0	0
19/01/2005 12:00:00	0	0	0	0	0	0	0	0	0	0	0	0	0
19/01/2005 13:00:00	0	0	0	0	0	0	0	0	0	0	0	0	0
19/01/2005 14:00:00	0	0	0	0	0	0	0	0	0	0	0	0	0
19/01/2005 15:00:00	0	0	0	0	0	0	0	0	0	0	0	0	0
19/01/2005 16:00:00	0	0	0	0	0	0	0	0	0	0	0	0	0
19/01/2005 17:00:00	0	0	0	0	0	0	0	0	0	0	0	0	0
19/01/2005 18:00:00	0	0	0	0	0	0	0	0	0	0	0	0	0
19/01/2005 19:00:00	0	0	0	0	0	0	0	0	0	0	0	0	0
19/01/2005 20:00:00	0	0	0	0	0	0	0	0	0	0	0	0	0
19/01/2005 21:00:00	0	0	0	0	0	0	0	0	0	0	0	0	0
19/01/2005 22:00:00	0	0	0	0	0	0	0	0	0	0	0	0	0
19/01/2005 23:00:00	0	0	0	0	0	0	0	0	0	0	0	0	0
20/01/2005 00:00:00	0	0	0	0	0	0	0	0	0	0	0	0	0
20/01/2005 01:00:00	0	0	0	0	0	0	0	0	0	0	0	0	0
20/01/2005 02:00:00	0	0	0	0	0	0	0	0	0	0	0	0	0
20/01/2005 03:00:00	0	0	0	0	0	0	0	0	0	0	0	0	0
20/01/2005 04:00:00	0	0	0	0	0	0	0	0	0	0	0	0	0
20/01/2005 05:00:00	0	0	0	0	0	0	0	0	0	0	0	0	0
20/01/2005 06:00:00	0	0	0	0	0	0	0	0	0	0	0	0	0
20/01/2005 07:00:00	0	0	0	0	0	0	0	0	0	0	0	0	0
20/01/2005 08:00:00	0	0	0	0	0	0	0	0	0	0	0	0	0
20/01/2005 09:00:00	0	0	0	0	0	0	0	0	0	0	0	0	0
20/01/2005 10:00:00	0	0	0	0	0	0	0	0	0	0	0	0	0
20/01/2005 11:00:00	0	0	0	0	0	0	0	0	0	0	0	0	0
20/01/2005 12:00:00	0	0	0	0	0	0	0	0	0	0	0	0	0
20/01/2005 13:00:00	0	0	0	0	0	0	0	0	0	0	0	0	0
20/01/2005 14:00:00	0	0	0	0	0	0	0	0	0	0	0	0	0
20/01/2005 15:00:00	0	0	0	0	0	0	0	0	0	0	0	0	0
20/01/2005 16:00:00	0	0	0	0	0	0	0	0	0	0	0	0	0
20/01/2005 17:00:00	0	0	0	0	0	0	0	0	0	0	0	0	0
20/01/2005 18:00:00	0	0	0	0	0	0	0	0	0	0	0	0	0
20/01/2005 19:00:00	0	0	0	0	0	0	0	0	0	0	0	0	0
20/01/2005 20:00:00	0	0	0	0	0	0	0	0	0	0	0	0	0
20/01/2005 21:00:00	0	0	0	0	0	0	0	0	0	0	0	0	0
20/01/2005 22:00:00	0	0	0	0	0	0	0	0	0	0	0	0	0
20/01/2005 23:00:00	0	0	0	0	0	0	0	0	0	0	0	0	0
21/01/2005 00:00:00	0	0	0	0	0	0	0	0	0.008333333	0.008333333	0.004166667	0	0.029166667
21/01/2005 01:00:00	0	0	0	0	0	0	0	0	0.008333333	0.008333333	0.004166667	0	0.029166667
21/01/2005 02:00:00	0	0	0	0	0	0	0	0	0.008333333	0.008333333	0.004166667	0	0.029166667
21/01/2005 03:00:00	0	0	0	0	0	0	0	0	0.008333333	0.008333333	0.004166667	0	0.029166667
21/01/2005 04:00:00	0	0	0	0	0	0	0	0	0.008333333	0.008333333	0.004166667	0	0.029166667
21/01/2005 05:00:00	0	0	0	0	0	0	0	0	0.008333333	0.008333333	0.004166667	0	0.029166667
21/01/2005 06:00:00	0	0	0	0	0	0	0	0	0.008333333	0.008333333	0.004166667	0	0.029166667
21/01/2005 07:00:00	0	0	0	0	0	0	0	0	0.008333333	0.008333333	0.004166667	0	0.029166667
21/01/2005 08:00:00	0	0	0	0	0	0	0	0	0.008333333	0.008333333	0.004166667	0	0.029166667
21/01/2005 09:00:00	0	0	0	0	0	0	0	0	0.008333333	0.008333333	0.004166667	0	0.029166667
21/01/2005 10:00:00	0	0	0	0	0	0	0	0	0.008333333	0.008333333	0.004166667	0	0.029166667
21/01/2005 11:00:00	0	0	0	0	0	0	0	0	0.008333333	0.008333333	0.004166667	0	0.029166667
21/01/2005 12:00:00	0	0	0	0	0	0	0	0	0.008333333	0.008333333	0.004166667	0	0.029166667
21/01/2005 13:00:00	0	0	0	0	0	0	0	0	0.008333333	0.008333333	0.004166667	0	0.029166667
21/01/2005 14:00:00	0	0	0	0	0	0	0	0	0.008333333	0.008333333	0.004166667	0	0.029166667
21/01/2005 15:00:00	0	0	0	0	0	0	0	0	0.008333333	0.008333333	0.004166667	0	0.029166667
21/01/2005 16:00:00	0	0	0	0	0	0	0	0	0.008333333	0.008333333	0.004166667	0	0.029166667
21/01/2005 17:00:00	0	0	0	0	0	0	0	0	0.008333333	0.008333333	0.004166667	0	0.029166667
21/01/2005 18:00:00	0	0	0	0	0	0	0	0	0.008333333	0.008333333	0.004166667	0	0.029166667
21/01/2005 19:00:00	0	0	0	0	0	0	0	0	0.008333333	0.008333333	0.004166667	0	0.029166667
21/01/2005 20:00:00	0	0	0	0	0	0	0	0	0.008333333	0.008333333	0.004166667	0	0.029166667
21/01/2005 21:00:00	0	0	0	0	0	0	0	0	0.008333333	0.008333333	0.004166667	0	0.029166667
21/01/2005 22:00:00	0	0	0	0	0	0	0	0	0.008333333	0.008333333	0.004166667	0	0.029166667
21/01/2005 23:00:00	0	0	0	0	0	0	0	0	0.008333333	0.008333333	0.004166667	0	0.029166667
22/01/2005 00:00:00	0	0	0	0	0	0	0	0	0	0	0	0	0
22/01/2005 01:00:00	0	0	0	0	0	0	0	0	0	0	0	0	0
22/01/2005 02:00:00	0	0	0	0	0	0	0	0	0	0	0	0	0
22/01/2005 03:00:00	0	0	0	0	0	0	0	0	0	0	0	0	0
22/01/2005 04:00:00	0	0	0	0	0	0	0	0	0	0	0	0	0
22/01/2005 05:00:00	0	0	0	0	0	0	0	0	0	0	0	0	0
22/01/2005 06:00:00	0	0	0	0	0	0	0	0	0	0	0	0	0
22/01/2005 07:00:00	0	0	0	0	0	0	0	0	0	0	0	0	0
22/01/2005 08:00:00	0	0	0	0	0	0	0	0	0	0	0	0	0
22/01/2005 09:00:00	0	0	0	0	0	0	0	0	0	0	0	0	0
22/01/2005 10:00:00	0	0	0	0	0	0	0	0	0	0	0	0	0
22/01/2005 11:00:00	0	0	0	0	0	0	0	0	0	0	0	0	0
22/01/2005 12:00:00	0	0	0	0	0	0	0	0	0	0	0	0	0
22/01/2005 13:00:00	0	0	0	0	0	0	0	0	0	0	0	0	0
22/01/2005 14:00:00	0	0	0	0	0	0	0	0	0	0	0	0	0
22/01/2005 15:00:00	0	0	0	0	0	0	0	0	0	0	0	0	0
22/01/2005 16:00:00	0	0	0	0	0	0	0	0	0	0	0	0	0
22/01/2005 17:00:00	0	0	0	0	0	0	0	0	0	0	0	0	0
22/01/2005 18:00:00	0	0	0	0	0	0	0	0	0	0	0	0	0
22/01/2005 19:00:00	0	0	0	0	0	0	0	0	0	0	0	0	0
22/01/2005 20:00:00	0	0	0	0	0	0	0	0	0	0	0	0	0
22/01/2005 21:00:00	0	0	0	0	0	0	0	0	0	0	0	0	0
22/01/2005 22:00:00	0	0	0	0	0	0	0	0	0	0	0	0	0
22/01/2005 23:00:00	0	0	0	0	0	0	0	0	0	0	0	0	0
23/01/2005 00:00:00	0.083333333	0.041666667	0.008333333	0.058333333	0.0375	0.029166667	0.045833333	0.0375	0.016666667	0.045833333	0.029166667	0.045833333	0.075
23/01/2005 01:00:00	0.083333333	0.041666667	0.008333333	0.058333333	0.0375	0.029166667	0.045833333	0.0375	0.016666667	0.045833333	0.029166667	0.045833333	0.075
23/01/2005 02:00:00	0.083333333	0.041666667	0.008333333	0.058333333	0.0375	0.029166667	0.045833333	0.0375	0.016666667	0.045833333	0.029166667	0.045833333	0.075
23/01/2005 03:00:00	0.083333333	0.041666667	0.008333333	0.058333333	0.0375	0.029166667	0.045833333	0.0375	0.016666667	0.045833333	0.029166667	0.045833333	0.075
23/01/2005 04:00:00	0.083333333	0.041666667	0.008333333	0.058333333	0.0375	0.029166667	0.045833333	0.0375	0.016666667	0.045833333	0.029166667	0.045833333	0.075
23/01/2005 05:00:00	0.083333333	0.041666667	0.008333333	0.058333333	0.0375	0.029166667	0.045833333	0.0375	0.016666667	0.045833333	0.029166667	0.045833333	0.075
23/01/2005 06:00:00	0.083333333	0.041666667	0.008333333	0.058333333	0.0375	0.029166667	0.045833333	0.0375	0.016666667	0.045833333	0.029166667	0.045833333	0.075
23/01/2005 07:00:00	0.083333333	0.041666667	0.008333333	0.058333333	0.0375	0.029166667	0.045833333	0.0375	0.016666667	0.045833333	0.029166667	0.045833333	0.075
23/01/2005 08:00:00	0.083333333	0.041666667	0.008333333	0.058333333	0.0375	0.029166667	0.045833333	0.0375	0.016666667	0.045833333	0.029166667	0.045833333	0.075
23/01/2005 09:00:00	0.083333333	0.041666667	0.008333333	0.058333333	0.0375	0.029166667	0.045833333	0.0375	0.016666667	0.045833333	0.029166667	0.045833333	0.075
23/01/2005 10:00:00	0.083333333	0.041666667	0.008333333	0.058333333	0.0375	0.029166667	0.045833333	0.0375	0.016666667	0.045833333	0.029166667	0.045833333	0.075
23/01/2005 11:00:00	0.083333333	0.041666667	0.008333333	0.058333333	0.0375	0.029166667	0.045833333	0.0375	0.016666667	0.045833333	0.029166667	0.045833333	0.075
23/01/2005 12:00:00	0.083333333	0.041666667	0.008333333	0.058333333	0.0375	0.029166667	0.045833333	0.0375	0.016666667	0.045833333	0.029166667	0.045833333	0.075
23/01/2005 13:00:00	0.083333333	0.041666667	0.008333333	0.058333333	0.0375	0.029166667	0.045833333	0.0375	0.016666667	0.045833333	0.029166667	0.045833333	0.075
23/01/2005 14:00:00	0.083333333	0.041666667	0.008333333	0.058333333	0.0375	0.029166667	0.045833333	0.0375	0.016666667	0.045833333	0.029166667	0.045833333	0.075
23/01/2005 15:00:00	0.083333333	0.041666667	0.008333333	0.058333333	0.0375	0.029166667	0.045833333	0.0375	0.016666667	0.045833333	0.029166667	0.045833333	0.075
23/01/2005 16:00:00	0.083333333	0.041666667	0.008333333	0.058333333	0.0375	0.029166667	0.045833333	0.0375	0.016666667	0.045833333	0.029166667	0.045833333	0.075
23/01/2005 17:00:00	0.083333333	0.041666667	0.008333333	0.058333333	0.0375	0.029166667	0.045833333	0.0375	0.016666667	0.045833333	0.029166667	0.045833333	0.075
23/01/2005 18:00:00	0.083333333	0.041666667	0.008333333	0.058333333	0.0375	0.029166667	0.045833333	0.0375	0.016666667	0.045833333	0.029166667	0.045833333	0.075
23/01/2005 19:00:00	0.083333333	0.041666667	0.008333333	0.058333333	0.0375	0.029166667	0.045833333	0.0375	0.016666667	0.045833333	0.029166667	0.045833333	0.075
23/01/2005 20:00:00	0.083333333	0.041666667	0.008333333	0.058333333	0.0375	0.029166667	0.045833333	0.0375	0.016666667	0.045833333	0.029166667	0.045833333	0.075
23/01/2005 21:00:00	0.083333333	0.041666667	0.008333333	0.058333333	0.0375	0.029166667	0.045833333	0.0375	0.016666667	0.045833333	0.029166667	0.045833333	0.075
23/01/2005 22:00:00	0.083333333	0.041666667	0.008333333	0.058333333	0.0375	0.029166667	0.045833333	0.0375	0.016666667	0.045833333	0.029166667	0.045833333	0.075
23/01/2005 23:00:00	0.083333333	0.041666667	0.008333333	0.058333333	0.0375	0.029166667	0.045833333	0.0375	0.016666667	0.045833333	0.029166667	0.045833333	0.075
24/01/2005 00:00:00	0.479166667	0.295833333	0.333333333	0.320833333	0.320833333	0.2625	0.4	0.4125	0.3	0.320833333	0.454166667	0.391666667	0.620833333
24/01/2005 01:00:00	0.479166667	0.295833333	0.333333333	0.320833333	0.320833333	0.2625	0.4	0.4125	0.3	0.320833333	0.454166667	0.391666667	0.620833333
24/01/2005 02:00:00	0.479166667	0.295833333	0.333333333	0.320833333	0.320833333	0.2625	0.4	0.4125	0.3	0.320833333	0.454166667	0.391666667	0.620833333
24/01/2005 03:00:00	0.479166667	0.295833333	0.333333333	0.320833333	0.320833333	0.2625	0.4	0.4125	0.3	0.320833333	0.454166667	0.391666667	0.620833333
24/01/2005 04:00:00	0.479166667	0.295833333	0.333333333	0.320833333	0.320833333	0.2625	0.4	0.4125	0.3	0.320833333	0.454166667	0.391666667	0.620833333
24/01/2005 05:00:00	0.479166667	0.295833333	0.333333333	0.320833333	0.320833333	0.2625	0.4	0.4125	0.3	0.320833333	0.454166667	0.391666667	0.620833333
24/01/2005 06:00:00	0.479166667	0.295833333	0.333333333	0.320833333	0.320833333	0.2625	0.4	0.4125	0.3	0.320833333	0.454166667	0.391666667	0.620833333
24/01/2005 07:00:00	0.479166667	0.295833333	0.333333333	0.320833333	0.320833333	0.2625	0.4	0.4125	0.3	0.320833333	0.454166667	0.391666667	0.620833333
24/01/2005 08:00:00	0.479166667	0.295833333	0.333333333	0.320833333	0.320833333	0.2625	0.4	0.4125	0.3	0.320833333	0.454166667	0.391666667	0.620833333
24/01/2005 09:00:00	0.479166667	0.295833333	0.333333333	0.320833333	0.320833333	0.2625	0.4	0.4125	0.3	0.320833333	0.454166667	0.391666667	0.620833333
24/01/2005 10:00:00	0.479166667	0.295833333	0.333333333	0.320833333	0.320833333	0.2625	0.4	0.4125	0.3	0.320833333	0.454166667	0.391666667	0.620833333
24/01/2005 11:00:00	0.479166667	0.295833333	0.333333333	0.320833333	0.320833333	0.2625	0.4	0.4125	0.3	0.320833333	0.454166667	0.391666667	0.620833333
24/01/2005 12:00:00	0.479166667	0.295833333	0.333333333	0.320833333	0.320833333	0.2625	0.4	0.4125	0.3	0.320833333	0.454166667	0.391666667	0.620833333
24/01/2005 13:00:00	0.479166667	0.295833333	0.333333333	0.320833333	0.320833333	0.2625	0.4	0.4125	0.3	0.320833333	0.454166667	0.391666667	0.620833333
24/01/2005 14:00:00	0.479166667	0.295833333	0.333333333	0.320833333	0.320833333	0.2625	0.4	0.4125	0.3	0.320833333	0.454166667	0.391666667	0.620833333
24/01/2005 15:00:00	0.479166667	0.295833333	0.333333333	0.320833333	0.320833333	0.2625	0.4	0.4125	0.3	0.320833333	0.454166667	0.391666667	0.620833333
24/01/2005 16:00:00	0.479166667	0.295833333	0.333333333	0.320833333	0.320833333	0.2625	0.4	0.4125	0.3	0.320833333	0.454166667	0.391666667	0.620833333
24/01/2005 17:00:00	0.479166667	0.295833333	0.333333333	0.320833333	0.320833333	0.2625	0.4	0.4125	0.3	0.320833333	0.454166667	0.391666667	0.620833333
24/01/2005 18:00:00	0.479166667	0.295833333	0.333333333	0.320833333	0.320833333	0.2625	0.4	0.4125	0.3	0.320833333	0.454166667	0.391666667	0.620833333
24/01/2005 19:00:00	0.479166667	0.295833333	0.333333333	0.320833333	0.320833333	0.2625	0.4	0.4125	0.3	0.320833333	0.454166667	0.391666667	0.620833333
24/01/2005 20:00:00	0.479166667	0.295833333	0.333333333	0.320833333	0.320833333	0.2625	0.4	0.4125	0.3	0.320833333	0.454166667	0.391666667	0.620833333
24/01/2005 21:00:00	0.479166667	0.295833333	0.333333333	0.320833333	0.320833333	0.2625	0.4	0.4125	0.3	0.320833333	0.454166667	0.391666667	0.620833333
24/01/2005 22:00:00	0.479166667	0.295833333	0.333333333	0.320833333	0.320833333	0.2625	0.4	0.4125	0.3	0.320833333	0.454166667	0.391666667	0.620833333
24/01/2005 23:00:00	0.479166667	0.295833333	0.333333333	0.320833333	0.320833333	0.2625	0.4	0.4125	0.3	0.320833333	0.454166667	0.391666667	0.620833333
25/01/2005 00:00:00	0	0	0	0	0	0	0.016666667	0	0.016666667	0.0125	0.004166667	0.0125	0.025
25/01/2005 01:00:00	0	0	0	0	0	0	0.016666667	0	0.016666667	0.0125	0.004166667	0.0125	0.025
25/01/2005 02:00:00	0	0	0	0	0	0	0.016666667	0	0.016666667	0.0125	0.004166667	0.0125	0.025
25/01/2005 03:00:00	0	0	0	0	0	0	0.016666667	0	0.016666667	0.0125	0.004166667	0.0125	0.025
25/01/2005 04:00:00	0	0	0	0	0	0	0.016666667	0	0.016666667	0.0125	0.004166667	0.0125	0.025
25/01/2005 05:00:00	0	0	0	0	0	0	0.016666667	0	0.016666667	0.0125	0.004166667	0.0125	0.025
25/01/2005 06:00:00	0	0	0	0	0	0	0.016666667	0	0.016666667	0.0125	0.004166667	0.0125	0.025
25/01/2005 07:00:00	0	0	0	0	0	0	0.016666667	0	0.016666667	0.0125	0.004166667	0.0125	0.025
25/01/2005 08:00:00	0	0	0	0	0	0	0.016666667	0	0.016666667	0.0125	0.004166667	0.0125	0.025
25/01/2005 09:00:00	0	0	0	0	0	0	0.016666667	0	0.016666667	0.0125	0.004166667	0.0125	0.025
25/01/2005 10:00:00	0	0	0	0	0	0	0.016666667	0	0.016666667	0.0125	0.004166667	0.0125	0.025
25/01/2005 11:00:00	0	0	0	0	0	0	0.016666667	0	0.016666667	0.0125	0.004166667	0.0125	0.025
25/01/2005 12:00:00	0	0	0	0	0	0	0.016666667	0	0.016666667	0.0125	0.004166667	0.0125	0.025
25/01/2005 13:00:00	0	0	0	0	0	0	0.016666667	0	0.016666667	0.0125	0.004166667	0.0125	0.025
25/01/2005 14:00:00	0	0	0	0	0	0	0.016666667	0	0.016666667	0.0125	0.004166667	0.0125	0.025
25/01/2005 15:00:00	0	0	0	0	0	0	0.016666667	0	0.016666667	0.0125	0.004166667	0.0125	0.025
25/01/2005 16:00:00	0	0	0	0	0	0	0.016666667	0	0.016666667	0.0125	0.004166667	0.0125	0.025
25/01/2005 17:00:00	0	0	0	0	0	0	0.016666667	0	0.016666667	0.0125	0.004166667	0.0125	0.025
25/01/2005 18:00:00	0	0	0	0	0	0	0.016666667	0	0.016666667	0.0125	0.004166667	0.0125	0.025
25/01/2005 19:00:00	0	0	0	0	0	0	0.016666667	0	0.016666667	0.0125	0.004166667	0.0125	0.025
25/01/2005 20:00:00	0	0	0	0	0	0	0.016666667	0	0.016666667	0.0125	0.004166667	0.0125	0.025
25/01/2005 21:00:00	0	0	0	0	0	0	0.016666667	0	0.016666667	0.0125	0.004166667	0.0125	0.025
25/01/2005 22:00:00	0	0	0	0	0	0	0.016666667	0	0.016666667	0.0125	0.004166667	0.0125	0.025
25/01/2005 23:00:00	0	0	0	0	0	0	0.016666667	0	0.016666667	0.0125	0.004166667	0.0125	0.025
26/01/2005 00:00:00	0.041666667	0.058333333	0.029166667	0.029166667	0.0125	0.008333333	0.05	0.075	0.070833333	0.045833333	0.029166667	0.054166667	0.204166667
26/01/2005 01:00:00	0.041666667	0.058333333	0.029166667	0.029166667	0.0125	0.008333333	0.05	0.075	0.070833333	0.045833333	0.029166667	0.054166667	0.204166667
26/01/2005 02:00:00	0.041666667	0.058333333	0.029166667	0.029166667	0.0125	0.008333333	0.05	0.075	0.070833333	0.045833333	0.029166667	0.054166667	0.204166667
26/01/2005 03:00:00	0.041666667	0.058333333	0.029166667	0.029166667	0.0125	0.008333333	0.05	0.075	0.070833333	0.045833333	0.029166667	0.054166667	0.204166667
26/01/2005 04:00:00	0.041666667	0.058333333	0.029166667	0.029166667	0.0125	0.008333333	0.05	0.075	0.070833333	0.045833333	0.029166667	0.054166667	0.204166667
26/01/2005 05:00:00	0.041666667	0.058333333	0.029166667	0.029166667	0.0125	0.008333333	0.05	0.075	0.070833333	0.045833333	0.029166667	0.054166667	0.204166667
26/01/2005 06:00:00	0.041666667	0.058333333	0.029166667	0.029166667	0.0125	0.008333333	0.05	0.075	0.070833333	0.045833333	0.029166667	0.054166667	0.204166667
26/01/2005 07:00:00	0.041666667	0.058333333	0.029166667	0.029166667	0.0125	0.008333333	0.05	0.075	0.070833333	0.045833333	0.029166667	0.054166667	0.204166667
26/01/2005 08:00:00	0.041666667	0.058333333	0.029166667	0.029166667	0.0125	0.008333333	0.05	0.075	0.070833333	0.045833333	0.029166667	0.054166667	0.204166667
26/01/2005 09:00:00	0.041666667	0.058333333	0.029166667	0.029166667	0.0125	0.008333333	0.05	0.075	0.070833333	0.045833333	0.029166667	0.054166667	0.204166667
26/01/2005 10:00:00	0.041666667	0.058333333	0.029166667	0.029166667	0.0125	0.008333333	0.05	0.075	0.070833333	0.045833333	0.029166667	0.054166667	0.204166667
26/01/2005 11:00:00	0.041666667	0.058333333	0.029166667	0.029166667	0.0125	0.008333333	0.05	0.075	0.070833333	0.045833333	0.029166667	0.054166667	0.204166667
26/01/2005 12:00:00	0.041666667	0.058333333	0.029166667	0.029166667	0.0125	0.008333333	0.05	0.075	0.070833333	0.045833333	0.029166667	0.054166667	0.204166667
26/01/2005 13:00:00	0.041666667	0.058333333	0.029166667	0.029166667	0.0125	0.008333333	0.05	0.075	0.070833333	0.045833333	0.029166667	0.054166667	0.204166667
26/01/2005 14:00:00	0.041666667	0.058333333	0.029166667	0.029166667	0.0125	0.008333333	0.05	0.075	0.070833333	0.045833333	0.029166667	0.054166667	0.204166667
26/01/2005 15:00:00	0.041666667	0.058333333	0.029166667	0.029166667	0.0125	0.008333333	0.05	0.075	0.070833333	0.045833333	0.029166667	0.054166667	0.204166667
26/01/2005 16:00:00	0.041666667	0.058333333	0.029166667	0.029166667	0.0125	0.008333333	0.05	0.075	0.070833333	0.045833333	0.029166667	0.054166667	0.204166667
26/01/2005 17:00:00	0.041666667	0.058333333	0.029166667	0.029166667	0.0125	0.008333333	0.05	0.075	0.070833333	0.045833333	0.029166667	0.054166667	0.204166667
26/01/2005 18:00:00	0.041666667	0.058333333	0.029166667	0.029166667	0.0125	0.008333333	0.05	0.075	0.070833333	0.045833333	0.029166667	0.054166667	0.204166667
26/01/2005 19:00:00	0.041666667	0.058333333	0.029166667	0.029166667	0.0125	0.008333333	0.05	0.075	0.070833333	0.045833333	0.029166667	0.054166667	0.204166667
26/01/2005 20:00:00	0.041666667	0.058333333	0.029166667	0.029166667	0.0125	0.008333333	0.05	0.075	0.070833333	0.045833333	0.029166667	0.054166667	0.204166667
26/01/2005 21:00:00	0.041666667	0.058333333	0.029166667	0.029166667	0.0125	0.008333333	0.05	0.075	0.070833333	0.045833333	0.029166667	0.054166667	0.204166667
26/01/2005 22:00:00	0.041666667	0.058333333	0.029166667	0.029166667	0.0125	0.008333333	0.05	0.075	0.070833333	0.045833333	0.029166667	0.054166667	0.204166667
26/01/2005 23:00:00	0.041666667	0.058333333	0.029166667	0.029166667	0.0125	0.008333333	0.05	0.075	0.070833333	0.045833333	0.029166667	0.054166667	0.204166667
27/01/2005 00:00:00	0	0	0	0	0	0	0	0	0	0	0	0	0
27/01/2005 01:00:00	0	0	0	0	0	0	0	0	0	0	0	0	0
27/01/2005 02:00:00	0	0	0	0	0	0	0	0	0	0	0	0	0
27/01/2005 03:00:00	0	0	0	0	0	0	0	0	0	0	0	0	0
27/01/2005 04:00:00	0	0	0	0	0	0	0	0	0	0	0	0	0
27/01/2005 05:00:00	0	0	0	0	0	0	0	0	0	0	0	0	0
27/01/2005 06:00:00	0	0	0	0	0	0	0	0	0	0	0	0	0
27/01/2005 07:00:00	0	0	0	0	0	0	0	0	0	0	0	0	0
27/01/2005 08:00:00	0	0	0	0	0	0	0	0	0	0	0	0	0
27/01/2005 09:00:00	0	0	0	0	0	0	0	0	0	0	0	0	0
27/01/2005 10:00:00	0	0	0	0	0	0	0	0	0	0	0	0	0
27/01/2005 11:00:00	0	0	0	0	0	0	0	0	0	0	0	0	0
27/01/2005 12:00:00	0	0	0	0	0	0	0	0	0	0	0	0	0
27/01/2005 13:00:00	0	0	0	0	0	0	0	0	0	0	0	0	0
27/01/2005 14:00:00	0	0	0	0	0	0	0	0	0	0	0	0	0
27/01/2005 15:00:00	0	0	0	0	0	0	0	0	0	0	0	0	0
27/01/2005 16:00:00	0	0	0	0	0	0	0	0	0	0	0	0	0
27/01/2005 17:00:00	0	0	0	0	0	0	0	0	0	0	0	0	0
27/01/2005 18:00:00	0	0	0	0	0	0	0	0	0	0	0	0	0
27/01/2005 19:00:00	0	0	0	0	0	0	0	0	0	0	0	0	0
27/01/2005 20:00:00	0	0	0	0	0	0	0	0	0	0	0	0	0
27/01/2005 21:00:00	0	0	0	0	0	0	0	0	0	0	0	0	0
27/01/2005 22:00:00	0	0	0	0	0	0	0	0	0	0	0	0	0
27/01/2005 23:00:00	0	0	0	0	0	0	0	0	0	0	0	0	0
28/01/2005 00:00:00	0	0	0	0	0	0	0	0	0	0	0	0	0
28/01/2005 01:00:00	0	0	0	0	0	0	0	0	0	0	0	0	0
28/01/2005 02:00:00	0	0	0	0	0	0	0	0	0	0	0	0	0
28/01/2005 03:00:00	0	0	0	0	0	0	0	0	0	0	0	0	0
28/01/2005 04:00:00	0	0	0	0	0	0	0	0	0	0	0	0	0
28/01/2005 05:00:00	0	0	0	0	0	0	0	0	0	0	0	0	0
28/01/2005 06:00:00	0	0	0	0	0	0	0	0	0	0	0	0	0
28/01/2005 07:00:00	0	0	0	0	0	0	0	0	0	0	0	0	0
28/01/2005 08:00:00	0	0	0	0	0	0	0	0	0	0	0	0	0
28/01/2005 09:00:00	0	0	0	0	0	0	0	0	0	0	0	0	0
28/01/2005 10:00:00	0	0	0	0	0	0	0	0	0	0	0	0	0
28/01/2005 11:00:00	0	0	0	0	0	0	0	0	0	0	0	0	0
28/01/2005 12:00:00	0	0	0	0	0	0	0	0	0	0	0	0	0
28/01/2005 13:00:00	0	0	0	0	0	0	0	0	0	0	0	0	0
28/01/2005 14:00:00	0	0	0	0	0	0	0	0	0	0	0	0	0
28/01/2005 15:00:00	0	0	0	0	0	0	0	0	0	0	0	0	0
28/01/2005 16:00:00	0	0	0	0	0	0	0	0	0	0	0	0	0
28/01/2005 17:00:00	0	0	0	0	0	0	0	0	0	0	0	0	0
28/01/2005 18:00:00	0	0	0	0	0	0	0	0	0	0	0	0	0
28/01/2005 19:00:00	0	0	0	0	0	0	0	0	0	0	0	0	0
28/01/2005 20:00:00	0	0	0	0	0	0	0	0	0	0	0	0	0
28/01/2005 21:00:00	0	0	0	0	0	0	0	0	0	0	0	0	0
28/01/2005 22:00:00	0	0	0	0	0	0	0	0	0	0	0	0	0
28/01/2005 23:00:00	0	0	0	0	0	0	0	0	0	0	0	0	0
29/01/2005 00:00:00	0	0	0	0	0	0	0	0	0	0	0	0	0.004166667
29/01/2005 01:00:00	0	0	0	0	0	0	0	0	0	0	0	0	0.004166667
29/01/2005 02:00:00	0	0	0	0	0	0	0	0	0	0	0	0	0.004166667
29/01/2005 03:00:00	0	0	0	0	0	0	0	0	0	0	0	0	0.004166667
29/01/2005 04:00:00	0	0	0	0	0	0	0	0	0	0	0	0	0.004166667
29/01/2005 05:00:00	0	0	0	0	0	0	0	0	0	0	0	0	0.004166667
29/01/2005 06:00:00	0	0	0	0	0	0	0	0	0	0	0	0	0.004166667
29/01/2005 07:00:00	0	0	0	0	0	0	0	0	0	0	0	0	0.004166667
29/01/2005 08:00:00	0	0	0	0	0	0	0	0	0	0	0	0	0.004166667
29/01/2005 09:00:00	0	0	0	0	0	0	0	0	0	0	0	0	0.004166667
29/01/2005 10:00:00	0	0	0	0	0	0	0	0	0	0	0	0	0.004166667
29/01/2005 11:00:00	0	0	0	0	0	0	0	0	0	0	0	0	0.004166667
29/01/2005 12:00:00	0	0	0	0	0	0	0	0	0	0	0	0	0.004166667
29/01/2005 13:00:00	0	0	0	0	0	0	0	0	0	0	0	0	0.004166667
29/01/2005 14:00:00	0	0	0	0	0	0	0	0	0	0	0	0	0.004166667
29/01/2005 15:00:00	0	0	0	0	0	0	0	0	0	0	0	0	0.004166667
29/01/2005 16:00:00	0	0	0	0	0	0	0	0	0	0	0	0	0.004166667
29/01/2005 17:00:00	0	0	0	0	0	0	0	0	0	0	0	0	0.004166667
29/01/2005 18:00:00	0	0	0	0	0	0	0	0	0	0	0	0	0.004166667
29/01/2005 19:00:00	0	0	0	0	0	0	0	0	0	0	0	0	0.004166667
29/01/2005 20:00:00	0	0	0	0	0	0	0	0	0	0	0	0	0.004166667
29/01/2005 21:00:00	0	0	0	0	0	0	0	0	0	0	0	0	0.004166667
29/01/2005 22:00:00	0	0	0	0	0	0	0	0	0	0	0	0	0.004166667
29/01/2005 23:00:00	0	0	0	0	0	0	0	0	0	0	0	0	0.004166667
30/01/2005 00:00:00	0	0	0	0	0	0	0	0	0	0	0	0	0
30/01/2005 01:00:00	0	0	0	0	0	0	0	0	0	0	0	0	0
30/01/2005 02:00:00	0	0	0	0	0	0	0	0	0	0	0	0	0
30/01/2005 03:00:00	0	0	0	0	0	0	0	0	0	0	0	0	0
30/01/2005 04:00:00	0	0	0	0	0	0	0	0	0	0	0	0	0
30/01/2005 05:00:00	0	0	0	0	0	0	0	0	0	0	0	0	0
30/01/2005 06:00:00	0	0	0	0	0	0	0	0	0	0	0	0	0
30/01/2005 07:00:00	0	0	0	0	0	0	0	0	0	0	0	0	0
30/01/2005 08:00:00	0	0	0	0	0	0	0	0	0	0	0	0	0
30/01/2005 09:00:00	0	0	0	0	0	0	0	0	0	0	0	0	0
30/01/2005 10:00:00	0	0	0	0	0	0	0	0	0	0	0	0	0
30/01/2005 11:00:00	0	0	0	0	0	0	0	0	0	0	0	0	0
30/01/2005 12:00:00	0	0	0	0	0	0	0	0	0	0	0	0	0
30/01/2005 13:00:00	0	0	0	0	0	0	0	0	0	0	0	0	0
30/01/2005 14:00:00	0	0	0	0	0	0	0	0	0	0	0	0	0
30/01/2005 15:00:00	0	0	0	0	0	0	0	0	0	0	0	0	0
30/01/2005 16:00:00	0	0	0	0	0	0	0	0	0	0	0	0	0
30/01/2005 17:00:00	0	0	0	0	0	0	0	0	0	0	0	0	0
30/01/2005 18:00:00	0	0	0	0	0	0	0	0	0	0	0	0	0
30/01/2005 19:00:00	0	0	0	0	0	0	0	0	0	0	0	0	0
30/01/2005 20:00:00	0	0	0	0	0	0	0	0	0	0	0	0	0
30/01/2005 21:00:00	0	0	0	0	0	0	0	0	0	0	0	0	0
30/01/2005 22:00:00	0	0	0	0	0	0	0	0	0	0	0	0	0
30/01/2005 23:00:00	0	0	0	0	0	0	0	0	0	0	0	0	0
31/01/2005 00:00:00	0	0	0	0	0	0	0	0	0	0	0	0	0
31/01/2005 01:00:00	0	0	0	0	0	0	0	0	0	0	0	0	0
31/01/2005 02:00:00	0	0	0	0	0	0	0	0	0	0	0	0	0
31/01/2005 03:00:00	0	0	0	0	0	0	0	0	0	0	0	0	0
31/01/2005 04:00:00	0	0	0	0	0	0	0	0	0	0	0	0	0
31/01/2005 05:00:00	0	0	0	0	0	0	0	0	0	0	0	0	0
31/01/2005 06:00:00	0	0	0	0	0	0	0	0	0	0	0	0	0
31/01/2005 07:00:00	0	0	0	0	0	0	0	0	0	0	0	0	0
31/01/2005 08:00:00	0	0	0	0	0	0	0	0	0	0	0	0	0
31/01/2005 09:00:00	0	0	0	0	0	0	0	0	0	0	0	0	0
31/01/2005 10:00:00	0	0	0	0	0	0	0	0	0	0	0	0	0
31/01/2005 11:00:00	0	0	0	0	0	0	0	0	0	0	0	0	0
31/01/2005 12:00:00	0	0	0	0	0	0	0	0	0	0	0	0	0
31/01/2005 13:00:00	0	0	0	0	0	0	0	0	0	0	0	0	0
31/01/2005 14:00:00	0	0	0	0	0	0	0	0	0	0	0	0	0
31/01/2005 15:00:00	0	0	0	0	0	0	0	0	0	0	0	0	0
31/01/2005 16:00:00	0	0	0	0	0	0	0	0	0	0	0	0	0
31/01/2005 17:00:00	0	0	0	0	0	0	0	0	0	0	0	0	0
31/01/2005 18:00:00	0	0	0	0	0	0	0	0	0	0	0	0	0
31/01/2005 19:00:00	0	0	0	0	0	0	0	0	0	0	0	0	0
31/01/2005 20:00:00	0	0	0	0	0	0	0	0	0	0	0	0	0
31/01/2005 21:00:00	0	0	0	0	0	0	0	0	0	0	0	0	0
31/01/2005 22:00:00	0	0	0	0	0	0	0	0	0	0	0	0	0
31/01/2005 23:00:00	0	0	0	0	0	0	0	0	0	0	0	0	0
01/02/2005 00:00:00	0	0	0	0	0	0	0	0	0	0	0	0	0
01/02/2005 01:00:00	0	0	0	0	0	0	0	0	0	0	0	0	0
01/02/2005 02:00:00	0	0	0	0	0	0	0	0	0	0	0	0	0
01/02/2005 03:00:00	0	0	0	0	0	0	0	0	0	0	0	0	0
01/02/2005 04:00:00	0	0	0	0	0	0	0	0	0	0	0	0	0
01/02/2005 05:00:00	0	0	0	0	0	0	0	0	0	0	0	0	0
01/02/2005 06:00:00	0	0	0	0	0	0	0	0	0	0	0	0	0
01/02/2005 07:00:00	0	0	0	0	0	0	0	0	0	0	0	0	0
01/02/2005 08:00:00	0	0	0	0	0	0	0	0	0	0	0	0	0
01/02/2005 09:00:00	0	0	0	0	0	0	0	0	0	0	0	0	0
01/02/2005 10:00:00	0	0	0	0	0	0	0	0	0	0	0	0	0
01/02/2005 11:00:00	0	0	0	0	0	0	0	0	0	0	0	0	0
01/02/2005 12:00:00	0	0	0	0	0	0	0	0	0	0	0	0	0
01/02/2005 13:00:00	0	0	0	0	0	0	0	0	0	0	0	0	0
01/02/2005 14:00:00	0	0	0	0	0	0	0	0	0	0	0	0	0
01/02/2005 15:00:00	0	0	0	0	0	0	0	0	0	0	0	0	0
01/02/2005 16:00:00	0	0	0	0	0	0	0	0	0	0	0	0	0
01/02/2005 17:00:00	0	0	0	0	0	0	0	0	0	0	0	0	0
01/02/2005 18:00:00	0	0	0	0	0	0	0	0	0	0	0	0	0
01/02/2005 19:00:00	0	0	0	0	0	0	0	0	0	0	0	0	0
01/02/2005 20:00:00	0	0	0	0	0	0	0	0	0	0	0	0	0
01/02/2005 21:00:00	0	0	0	0	0	0	0	0	0	0	0	0	0
01/02/2005 22:00:00	0	0	0	0	0	0	0	0	0	0	0	0	0
01/02/2005 23:00:00	0	0	0	0	0	0	0	0	0	0	0	0	0
02/02/2005 00:00:00	0	0	0	0	0	0	0	0	0	0	0	0	0
02/02/2005 01:00:00	0	0	0	0	0	0	0	0	0	0	0	0	0
02/02/2005 02:00:00	0	0	0	0	0	0	0	0	0	0	0	0	0
02/02/2005 03:00:00	0	0	0	0	0	0	0	0	0	0	0	0	0
02/02/2005 04:00:00	0	0	0	0	0	0	0	0	0	0	0	0	0
02/02/2005 05:00:00	0	0	0	0	0	0	0	0	0	0	0	0	0
02/02/2005 06:00:00	0	0	0	0	0	0	0	0	0	0	0	0	0
02/02/2005 07:00:00	0	0	0	0	0	0	0	0	0	0	0	0	0
02/02/2005 08:00:00	0	0	0	0	0	0	0	0	0	0	0	0	0
02/02/2005 09:00:00	0	0	0	0	0	0	0	0	0	0	0	0	0
02/02/2005 10:00:00	0	0	0	0	0	0	0	0	0	0	0	0	0
02/02/2005 11:00:00	0	0	0	0	0	0	0	0	0	0	0	0	0
02/02/2005 12:00:00	0	0	0	0	0	0	0	0	0	0	0	0	0
02/02/2005 13:00:00	0	0	0	0	0	0	0	0	0	0	0	0	0
02/02/2005 14:00:00	0	0	0	0	0	0	0	0	0	0	0	0	0
02/02/2005 15:00:00	0	0	0	0	0	0	0	0	0	0	0	0	0
02/02/2005 16:00:00	0	0	0	0	0	0	0	0	0	0	0	0	0
02/02/2005 17:00:00	0	0	0	0	0	0	0	0	0	0	0	0	0
02/02/2005 18:00:00	0	0	0	0	0	0	0	0	0	0	0	0	0
02/02/2005 19:00:00	0	0	0	0	0	0	0	0	0	0	0	0	0
02/02/2005 20:00:00	0	0	0	0	0	0	0	0	0	0	0	0	0
02/02/2005 21:00:00	0	0	0	0	0	0	0	0	0	0	0	0	0
02/02/2005 22:00:00	0	0	0	0	0	0	0	0	0	0	0	0	0
02/02/2005 23:00:00	0	0	0	0	0	0	0	0	0	0	0	0	0
03/02/2005 00:00:00	0	0	0	0	0	0	0	0	0	0	0	0	0
03/02/2005 01:00:00	0	0	0	0	0	0	0	0	0	0	0	0	0
03/02/2005 02:00:00	0	0	0	0	0	0	0	0	0	0	0	0	0
03/02/2005 03:00:00	0	0	0	0	0	0	0	0	0	0	0	0	0
03/02/2005 04:00:00	0	0	0	0	0	0	0	0	0	0	0	0	0
03/02/2005 05:00:00	0	0	0	0	0	0	0	0	0	0	0	0	0
03/02/2005 06:00:00	0	0	0	0	0	0	0	0	0	0	0	0	0
03/02/2005 07:00:00	0	0	0	0	0	0	0	0	0	0	0	0	0
03/02/2005 08:00:00	0	0	0	0	0	0	0	0	0	0	0	0	0
03/02/2005 09:00:00	0	0	0	0	0	0	0	0	0	0	0	0	0
03/02/2005 10:00:00	0	0	0	0	0	0	0	0	0	0	0	0	0
03/02/2005 11:00:00	0	0	0	0	0	0	0	0	0	0	0	0	0
03/02/2005 12:00:00	0	0	0	0	0	0	0	0	0	0	0	0	0
03/02/2005 13:00:00	0	0	0	0	0	0	0	0	0	0	0	0	0
03/02/2005 14:00:00	0	0	0	0	0	0	0	0	0	0	0	0	0
03/02/2005 15:00:00	0	0	0	0	0	0	0	0	0	0	0	0	0
03/02/2005 16:00:00	0	0	0	0	0	0	0	0	0	0	0	0	0
03/02/2005 17:00:00	0	0	0	0	0	0	0	0	0	0	0	0	0
03/02/2005 18:00:00	0	0	0	0	0	0	0	0	0	0	0	0	0
03/02/2005 19:00:00	0	0	0	0	0	0	0	0	0	0	0	0	0
03/02/2005 20:00:00	0	0	0	0	0	0	0	0	0	0	0	0	0
03/02/2005 21:00:00	0	0	0	0	0	0	0	0	0	0	0	0	0
03/02/2005 22:00:00	0	0	0	0	0	0	0	0	0	0	0	0	0
03/02/2005 23:00:00	0	0	0	0	0	0	0	0	0	0	0	0	0
04/02/2005 00:00:00	0	0	0	0	0	0	0	0	0	0	0	0	0
04/02/2005 01:00:00	0	0	0	0	0	0	0	0	0	0	0	0	0
04/02/2005 02:00:00	0	0	0	0	0	0	0	0	0	0	0	0	0
04/02/2005 03:00:00	0	0	0	0	0	0	0	0	0	0	0	0	0
04/02/2005 04:00:00	0	0	0	0	0	0	0	0	0	0	0	0	0
04/02/2005 05:00:00	0	0	0	0	0	0	0	0	0	0	0	0	0
04/02/2005 06:00:00	0	0	0	0	0	0	0	0	0	0	0	0	0
04/02/2005 07:00:00	0	0	0	0	0	0	0	0	0	0	0	0	0
04/02/2005 08:00:00	0	0	0	0	0	0	0	0	0	0	0	0	0
04/02/2005 09:00:00	0	0	0	0	0	0	0	0	0	0	0	0	0
04/02/2005 10:00:00	0	0	0	0	0	0	0	0	0	0	0	0	0
04/02/2005 11:00:00	0	0	0	0	0	0	0	0	0	0	0	0	0
04/02/2005 12:00:00	0	0	0	0	0	0	0	0	0	0	0	0	0
04/02/2005 13:00:00	0	0	0	0	0	0	0	0	0	0	0	0	0
04/02/2005 14:00:00	0	0	0	0	0	0	0	0	0	0	0	0	0
04/02/2005 15:00:00	0	0	0	0	0	0	0	0	0	0	0	0	0
04/02/2005 16:00:00	0	0	0	0	0	0	0	0	0	0	0	0	0
04/02/2005 17:00:00	0	0	0	0	0	0	0	0	0	0	0	0	0
04/02/2005 18:00:00	0	0	0	0	0	0	0	0	0	0	0	0	0
04/02/2005 19:00:00	0	0	0	0	0	0	0	0	0	0	0	0	0
04/02/2005 20:00:00	0	0	0	0	0	0	0	0	0	0	0	0	0
04/02/2005 21:00:00	0	0	0	0	0	0	0	0	0	0	0	0	0
04/02/2005 22:00:00	0	0	0	0	0	0	0	0	0	0	0	0	0
04/02/2005 23:00:00	0	0	0	0	0	0	0	0	0	0	0	0	0
05/02/2005 00:00:00	0.1125	0.025	0	0.025	0.041666667	0	0.1	0.166666667	0.254166667	0.179166667	0.095833333	0.1125	0.120833333
05/02/2005 01:00:00	0.1125	0.025	0	0.025	0.041666667	0	0.1	0.166666667	0.254166667	0.179166667	0.095833333	0.1125	0.120833333
05/02/2005 02:00:00	0.1125	0.025	0	0.025	0.041666667	0	0.1	0.166666667	0.254166667	0.179166667	0.095833333	0.1125	0.120833333
05/02/2005 03:00:00	0.1125	0.025	0	0.025	0.041666667	0	0.1	0.166666667	0.254166667	0.179166667	0.095833333	0.1125	0.120833333
05/02/2005 04:00:00	0.1125	0.025	0	0.025	0.041666667	0	0.1	0.166666667	0.254166667	0.179166667	0.095833333	0.1125	0.120833333
05/02/2005 05:00:00	0.1125	0.025	0	0.025	0.041666667	0	0.1	0.166666667	0.254166667	0.179166667	0.095833333	0.1125	0.120833333
05/02/2005 06:00:00	0.1125	0.025	0	0.025	0.041666667	0	0.1	0.166666667	0.254166667	0.179166667	0.095833333	0.1125	0.120833333
05/02/2005 07:00:00	0.1125	0.025	0	0.025	0.041666667	0	0.1	0.166666667	0.254166667	0.179166667	0.095833333	0.1125	0.120833333
05/02/2005 08:00:00	0.1125	0.025	0	0.025	0.041666667	0	0.1	0.166666667	0.254166667	0.179166667	0.095833333	0.1125	0.120833333
05/02/2005 09:00:00	0.1125	0.025	0	0.025	0.041666667	0	0.1	0.166666667	0.254166667	0.179166667	0.095833333	0.1125	0.120833333
05/02/2005 10:00:00	0.1125	0.025	0	0.025	0.041666667	0	0.1	0.166666667	0.254166667	0.179166667	0.095833333	0.1125	0.120833333
05/02/2005 11:00:00	0.1125	0.025	0	0.025	0.041666667	0	0.1	0.166666667	0.254166667	0.179166667	0.095833333	0.1125	0.120833333
05/02/2005 12:00:00	0.1125	0.025	0	0.025	0.041666667	0	0.1	0.166666667	0.254166667	0.179166667	0.095833333	0.1125	0.120833333
05/02/2005 13:00:00	0.1125	0.025	0	0.025	0.041666667	0	0.1	0.166666667	0.254166667	0.179166667	0.095833333	0.1125	0.120833333
05/02/2005 14:00:00	0.1125	0.025	0	0.025	0.041666667	0	0.1	0.166666667	0.254166667	0.179166667	0.095833333	0.1125	0.120833333
05/02/2005 15:00:00	0.1125	0.025	0	0.025	0.041666667	0	0.1	0.166666667	0.254166667	0.179166667	0.095833333	0.1125	0.120833333
05/02/2005 16:00:00	0.1125	0.025	0	0.025	0.041666667	0	0.1	0.166666667	0.254166667	0.179166667	0.095833333	0.1125	0.120833333
05/02/2005 17:00:00	0.1125	0.025	0	0.025	0.041666667	0	0.1	0.166666667	0.254166667	0.179166667	0.095833333	0.1125	0.120833333
05/02/2005 18:00:00	0.1125	0.025	0	0.025	0.041666667	0	0.1	0.166666667	0.254166667	0.179166667	0.095833333	0.1125	0.120833333
05/02/2005 19:00:00	0.1125	0.025	0	0.025	0.041666667	0	0.1	0.166666667	0.254166667	0.179166667	0.095833333	0.1125	0.120833333
05/02/2005 20:00:00	0.1125	0.025	0	0.025	0.041666667	0	0.1	0.166666667	0.254166667	0.179166667	0.095833333	0.1125	0.120833333
05/02/2005 21:00:00	0.1125	0.025	0	0.025	0.041666667	0	0.1	0.166666667	0.254166667	0.179166667	0.095833333	0.1125	0.120833333
05/02/2005 22:00:00	0.1125	0.025	0	0.025	0.041666667	0	0.1	0.166666667	0.254166667	0.179166667	0.095833333	0.1125	0.120833333
05/02/2005 23:00:00	0.1125	0.025	0	0.025	0.041666667	0	0.1	0.166666667	0.254166667	0.179166667	0.095833333	0.1125	0.120833333
06/02/2005 00:00:00	0.0625	0.016666667	0.279166667	0.054166667	0.020833333	0.104166667	0.0625	0.0625	0.133333333	0.054166667	0.154166667	0.095833333	0.120833333
06/02/2005 01:00:00	0.0625	0.016666667	0.279166667	0.054166667	0.020833333	0.104166667	0.0625	0.0625	0.133333333	0.054166667	0.154166667	0.095833333	0.120833333
06/02/2005 02:00:00	0.0625	0.016666667	0.279166667	0.054166667	0.020833333	0.104166667	0.0625	0.0625	0.133333333	0.054166667	0.154166667	0.095833333	0.120833333
06/02/2005 03:00:00	0.0625	0.016666667	0.279166667	0.054166667	0.020833333	0.104166667	0.0625	0.0625	0.133333333	0.054166667	0.154166667	0.095833333	0.120833333
06/02/2005 04:00:00	0.0625	0.016666667	0.279166667	0.054166667	0.020833333	0.104166667	0.0625	0.0625	0.133333333	0.054166667	0.154166667	0.095833333	0.120833333
06/02/2005 05:00:00	0.0625	0.016666667	0.279166667	0.054166667	0.020833333	0.104166667	0.0625	0.0625	0.133333333	0.054166667	0.154166667	0.095833333	0.120833333
06/02/2005 06:00:00	0.0625	0.016666667	0.279166667	0.054166667	0.020833333	0.104166667	0.0625	0.0625	0.133333333	0.054166667	0.154166667	0.095833333	0.120833333
06/02/2005 07:00:00	0.0625	0.016666667	0.279166667	0.054166667	0.020833333	0.104166667	0.0625	0.0625	0.133333333	0.054166667	0.154166667	0.095833333	0.120833333
06/02/2005 08:00:00	0.0625	0.016666667	0.279166667	0.054166667	0.020833333	0.104166667	0.0625	0.0625	0.133333333	0.054166667	0.154166667	0.095833333	0.120833333
06/02/2005 09:00:00	0.0625	0.016666667	0.279166667	0.054166667	0.020833333	0.104166667	0.0625	0.0625	0.133333333	0.054166667	0.154166667	0.095833333	0.120833333
06/02/2005 10:00:00	0.0625	0.016666667	0.279166667	0.054166667	0.020833333	0.104166667	0.0625	0.0625	0.133333333	0.054166667	0.154166667	0.095833333	0.120833333
06/02/2005 11:00:00	0.0625	0.016666667	0.279166667	0.054166667	0.020833333	0.104166667	0.0625	0.0625	0.133333333	0.054166667	0.154166667	0.095833333	0.120833333
06/02/2005 12:00:00	0.0625	0.016666667	0.279166667	0.054166667	0.020833333	0.104166667	0.0625	0.0625	0.133333333	0.054166667	0.154166667	0.095833333	0.120833333
06/02/2005 13:00:00	0.0625	0.016666667	0.279166667	0.054166667	0.020833333	0.104166667	0.0625	0.0625	0.133333333	0.054166667	0.154166667	0.095833333	0.120833333
06/02/2005 14:00:00	0.0625	0.016666667	0.279166667	0.054166667	0.020833333	0.104166667	0.0625	0.0625	0.133333333	0.054166667	0.154166667	0.095833333	0.120833333
06/02/2005 15:00:00	0.0625	0.016666667	0.279166667	0.054166667	0.020833333	0.104166667	0.0625	0.0625	0.133333333	0.054166667	0.154166667	0.095833333	0.120833333
06/02/2005 16:00:00	0.0625	0.016666667	0.279166667	0.054166667	0.020833333	0.104166667	0.0625	0.0625	0.133333333	0.054166667	0.154166667	0.095833333	0.120833333
06/02/2005 17:00:00	0.0625	0.016666667	0.279166667	0.054166667	0.020833333	0.104166667	0.0625	0.0625	0.133333333	0.054166667	0.154166667	0.095833333	0.120833333
06/02/2005 18:00:00	0.0625	0.016666667	0.279166667	0.054166667	0.020833333	0.104166667	0.0625	0.0625	0.133333333	0.054166667	0.154166667	0.095833333	0.120833333
06/02/2005 19:00:00	0.0625	0.016666667	0.279166667	0.054166667	0.020833333	0.104166667	0.0625	0.0625	0.133333333	0.054166667	0.154166667	0.095833333	0.120833333
06/02/2005 20:00:00	0.0625	0.016666667	0.279166667	0.054166667	0.020833333	0.104166667	0.0625	0.0625	0.133333333	0.054166667	0.154166667	0.095833333	0.120833333
06/02/2005 21:00:00	0.0625	0.016666667	0.279166667	0.054166667	0.020833333	0.104166667	0.0625	0.0625	0.133333333	0.054166667	0.154166667	0.095833333	0.120833333
06/02/2005 22:00:00	0.0625	0.016666667	0.279166667	0.054166667	0.020833333	0.104166667	0.0625	0.0625	0.133333333	0.054166667	0.154166667	0.095833333	0.120833333
06/02/2005 23:00:00	0.0625	0.016666667	0.279166667	0.054166667	0.020833333	0.104166667	0.0625	0.0625	0.133333333	0.054166667	0.154166667	0.095833333	0.120833333
07/02/2005 00:00:00	0.075	0.008333333	0.008333333	0.008333333	0.008333333	0	0.008333333	0	0.083333333	0.033333333	0.05	0.020833333	0.058333333
07/02/2005 01:00:00	0.075	0.008333333	0.008333333	0.008333333	0.008333333	0	0.008333333	0	0.083333333	0.033333333	0.05	0.020833333	0.058333333
07/02/2005 02:00:00	0.075	0.008333333	0.008333333	0.008333333	0.008333333	0	0.008333333	0	0.083333333	0.033333333	0.05	0.020833333	0.058333333
07/02/2005 03:00:00	0.075	0.008333333	0.008333333	0.008333333	0.008333333	0	0.008333333	0	0.083333333	0.033333333	0.05	0.020833333	0.058333333
07/02/2005 04:00:00	0.075	0.008333333	0.008333333	0.008333333	0.008333333	0	0.008333333	0	0.083333333	0.033333333	0.05	0.020833333	0.058333333
07/02/2005 05:00:00	0.075	0.008333333	0.008333333	0.008333333	0.008333333	0	0.008333333	0	0.083333333	0.033333333	0.05	0.020833333	0.058333333
07/02/2005 06:00:00	0.075	0.008333333	0.008333333	0.008333333	0.008333333	0	0.008333333	0	0.083333333	0.033333333	0.05	0.020833333	0.058333333
07/02/2005 07:00:00	0.075	0.008333333	0.008333333	0.008333333	0.008333333	0	0.008333333	0	0.083333333	0.033333333	0.05	0.020833333	0.058333333
07/02/2005 08:00:00	0.075	0.008333333	0.008333333	0.008333333	0.008333333	0	0.008333333	0	0.083333333	0.033333333	0.05	0.020833333	0.058333333
07/02/2005 09:00:00	0.075	0.008333333	0.008333333	0.008333333	0.008333333	0	0.008333333	0	0.083333333	0.033333333	0.05	0.020833333	0.058333333
07/02/2005 10:00:00	0.075	0.008333333	0.008333333	0.008333333	0.008333333	0	0.008333333	0	0.083333333	0.033333333	0.05	0.020833333	0.058333333
07/02/2005 11:00:00	0.075	0.008333333	0.008333333	0.008333333	0.008333333	0	0.008333333	0	0.083333333	0.033333333	0.05	0.020833333	0.058333333
07/02/2005 12:00:00	0.075	0.008333333	0.008333333	0.008333333	0.008333333	0	0.008333333	0	0.083333333	0.033333333	0.05	0.020833333	0.058333333
07/02/2005 13:00:00	0.075	0.008333333	0.008333333	0.008333333	0.008333333	0	0.008333333	0	0.083333333	0.033333333	0.05	0.020833333	0.058333333
07/02/2005 14:00:00	0.075	0.008333333	0.008333333	0.008333333	0.008333333	0	0.008333333	0	0.083333333	0.033333333	0.05	0.020833333	0.058333333
07/02/2005 15:00:00	0.075	0.008333333	0.008333333	0.008333333	0.008333333	0	0.008333333	0	0.083333333	0.033333333	0.05	0.020833333	0.058333333
07/02/2005 16:00:00	0.075	0.008333333	0.008333333	0.008333333	0.008333333	0	0.008333333	0	0.083333333	0.033333333	0.05	0.020833333	0.058333333
07/02/2005 17:00:00	0.075	0.008333333	0.008333333	0.008333333	0.008333333	0	0.008333333	0	0.083333333	0.033333333	0.05	0.020833333	0.058333333
07/02/2005 18:00:00	0.075	0.008333333	0.008333333	0.008333333	0.008333333	0	0.008333333	0	0.083333333	0.033333333	0.05	0.020833333	0.058333333
07/02/2005 19:00:00	0.075	0.008333333	0.008333333	0.008333333	0.008333333	0	0.008333333	0	0.083333333	0.033333333	0.05	0.020833333	0.058333333
07/02/2005 20:00:00	0.075	0.008333333	0.008333333	0.008333333	0.008333333	0	0.008333333	0	0.083333333	0.033333333	0.05	0.020833333	0.058333333
07/02/2005 21:00:00	0.075	0.008333333	0.008333333	0.008333333	0.008333333	0	0.008333333	0	0.083333333	0.033333333	0.05	0.020833333	0.058333333
07/02/2005 22:00:00	0.075	0.008333333	0.008333333	0.008333333	0.008333333	0	0.008333333	0	0.083333333	0.033333333	0.05	0.020833333	0.058333333
07/02/2005 23:00:00	0.075	0.008333333	0.008333333	0.008333333	0.008333333	0	0.008333333	0	0.083333333	0.033333333	0.05	0.020833333	0.058333333
08/02/2005 00:00:00	0.041666667	0.070833333	0.125	0.175	0.333333333	0.375	0.270833333	0.283333333	0.229166667	0.145833333	0.125	0.183333333	0.1125
08/02/2005 01:00:00	0.041666667	0.070833333	0.125	0.175	0.333333333	0.375	0.270833333	0.283333333	0.229166667	0.145833333	0.125	0.183333333	0.1125
08/02/2005 02:00:00	0.041666667	0.070833333	0.125	0.175	0.333333333	0.375	0.270833333	0.283333333	0.229166667	0.145833333	0.125	0.183333333	0.1125
08/02/2005 03:00:00	0.041666667	0.070833333	0.125	0.175	0.333333333	0.375	0.270833333	0.283333333	0.229166667	0.145833333	0.125	0.183333333	0.1125
08/02/2005 04:00:00	0.041666667	0.070833333	0.125	0.175	0.333333333	0.375	0.270833333	0.283333333	0.229166667	0.145833333	0.125	0.183333333	0.1125
08/02/2005 05:00:00	0.041666667	0.070833333	0.125	0.175	0.333333333	0.375	0.270833333	0.283333333	0.229166667	0.145833333	0.125	0.183333333	0.1125
08/02/2005 06:00:00	0.041666667	0.070833333	0.125	0.175	0.333333333	0.375	0.270833333	0.283333333	0.229166667	0.145833333	0.125	0.183333333	0.1125
08/02/2005 07:00:00	0.041666667	0.070833333	0.125	0.175	0.333333333	0.375	0.270833333	0.283333333	0.229166667	0.145833333	0.125	0.183333333	0.1125
08/02/2005 08:00:00	0.041666667	0.070833333	0.125	0.175	0.333333333	0.375	0.270833333	0.283333333	0.229166667	0.145833333	0.125	0.183333333	0.1125
08/02/2005 09:00:00	0.041666667	0.070833333	0.125	0.175	0.333333333	0.375	0.270833333	0.283333333	0.229166667	0.145833333	0.125	0.183333333	0.1125
08/02/2005 10:00:00	0.041666667	0.070833333	0.125	0.175	0.333333333	0.375	0.270833333	0.283333333	0.229166667	0.145833333	0.125	0.183333333	0.1125
08/02/2005 11:00:00	0.041666667	0.070833333	0.125	0.175	0.333333333	0.375	0.270833333	0.283333333	0.229166667	0.145833333	0.125	0.183333333	0.1125
08/02/2005 12:00:00	0.041666667	0.070833333	0.125	0.175	0.333333333	0.375	0.270833333	0.283333333	0.229166667	0.145833333	0.125	0.183333333	0.1125
08/02/2005 13:00:00	0.041666667	0.070833333	0.125	0.175	0.333333333	0.375	0.270833333	0.283333333	0.229166667	0.145833333	0.125	0.183333333	0.1125
08/02/2005 14:00:00	0.041666667	0.070833333	0.125	0.175	0.333333333	0.375	0.270833333	0.283333333	0.229166667	0.145833333	0.125	0.183333333	0.1125
08/02/2005 15:00:00	0.041666667	0.070833333	0.125	0.175	0.333333333	0.375	0.270833333	0.283333333	0.229166667	0.145833333	0.125	0.183333333	0.1125
08/02/2005 16:00:00	0.041666667	0.070833333	0.125	0.175	0.333333333	0.375	0.270833333	0.283333333	0.229166667	0.145833333	0.125	0.183333333	0.1125
08/02/2005 17:00:00	0.041666667	0.070833333	0.125	0.175	0.333333333	0.375	0.270833333	0.283333333	0.229166667	0.145833333	0.125	0.183333333	0.1125
08/02/2005 18:00:00	0.041666667	0.070833333	0.125	0.175	0.333333333	0.375	0.270833333	0.283333333	0.229166667	0.145833333	0.125	0.183333333	0.1125
08/02/2005 19:00:00	0.041666667	0.070833333	0.125	0.175	0.333333333	0.375	0.270833333	0.283333333	0.229166667	0.145833333	0.125	0.183333333	0.1125
08/02/2005 20:00:00	0.041666667	0.070833333	0.125	0.175	0.333333333	0.375	0.270833333	0.283333333	0.229166667	0.145833333	0.125	0.183333333	0.1125
08/02/2005 21:00:00	0.041666667	0.070833333	0.125	0.175	0.333333333	0.375	0.270833333	0.283333333	0.229166667	0.145833333	0.125	0.183333333	0.1125
08/02/2005 22:00:00	0.041666667	0.070833333	0.125	0.175	0.333333333	0.375	0.270833333	0.283333333	0.229166667	0.145833333	0.125	0.183333333	0.1125
08/02/2005 23:00:00	0.041666667	0.070833333	0.125	0.175	0.333333333	0.375	0.270833333	0.283333333	0.229166667	0.145833333	0.125	0.183333333	0.1125
09/02/2005 00:00:00	0	0	0.020833333	0	0	0	0.091666667	0.091666667	0.191666667	0.116666667	0.179166667	0.175	0.204166667
09/02/2005 01:00:00	0	0	0.020833333	0	0	0	0.091666667	0.091666667	0.191666667	0.116666667	0.179166667	0.175	0.204166667
09/02/2005 02:00:00	0	0	0.020833333	0	0	0	0.091666667	0.091666667	0.191666667	0.116666667	0.179166667	0.175	0.204166667
09/02/2005 03:00:00	0	0	0.020833333	0	0	0	0.091666667	0.091666667	0.191666667	0.116666667	0.179166667	0.175	0.204166667
09/02/2005 04:00:00	0	0	0.020833333	0	0	0	0.091666667	0.091666667	0.191666667	0.116666667	0.179166667	0.175	0.204166667
09/02/2005 05:00:00	0	0	0.020833333	0	0	0	0.091666667	0.091666667	0.191666667	0.116666667	0.179166667	0.175	0.204166667
09/02/2005 06:00:00	0	0	0.020833333	0	0	0	0.091666667	0.091666667	0.191666667	0.116666667	0.179166667	0.175	0.204166667
09/02/2005 07:00:00	0	0	0.020833333	0	0	0	0.091666667	0.091666667	0.191666667	0.116666667	0.179166667	0.175	0.204166667
09/02/2005 08:00:00	0	0	0.020833333	0	0	0	0.091666667	0.091666667	0.191666667	0.116666667	0.179166667	0.175	0.204166667
09/02/2005 09:00:00	0	0	0.020833333	0	0	0	0.091666667	0.091666667	0.191666667	0.116666667	0.179166667	0.175	0.204166667
09/02/2005 10:00:00	0	0	0.020833333	0	0	0	0.091666667	0.091666667	0.191666667	0.116666667	0.179166667	0.175	0.204166667
09/02/2005 11:00:00	0	0	0.020833333	0	0	0	0.091666667	0.091666667	0.191666667	0.116666667	0.179166667	0.175	0.204166667
09/02/2005 12:00:00	0	0	0.020833333	0	0	0	0.091666667	0.091666667	0.191666667	0.116666667	0.179166667	0.175	0.204166667
09/02/2005 13:00:00	0	0	0.020833333	0	0	0	0.091666667	0.091666667	0.191666667	0.116666667	0.179166667	0.175	0.204166667
09/02/2005 14:00:00	0	0	0.020833333	0	0	0	0.091666667	0.091666667	0.191666667	0.116666667	0.179166667	0.175	0.204166667
09/02/2005 15:00:00	0	0	0.020833333	0	0	0	0.091666667	0.091666667	0.191666667	0.116666667	0.179166667	0.175	0.204166667
09/02/2005 16:00:00	0	0	0.020833333	0	0	0	0.091666667	0.091666667	0.191666667	0.116666667	0.179166667	0.175	0.204166667
09/02/2005 17:00:00	0	0	0.020833333	0	0	0	0.091666667	0.091666667	0.191666667	0.116666667	0.179166667	0.175	0.204166667
09/02/2005 18:00:00	0	0	0.020833333	0	0	0	0.091666667	0.091666667	0.191666667	0.116666667	0.179166667	0.175	0.204166667
09/02/2005 19:00:00	0	0	0.020833333	0	0	0	0.091666667	0.091666667	0.191666667	0.116666667	0.179166667	0.175	0.204166667
09/02/2005 20:00:00	0	0	0.020833333	0	0	0	0.091666667	0.091666667	0.191666667	0.116666667	0.179166667	0.175	0.204166667
09/02/2005 21:00:00	0	0	0.020833333	0	0	0	0.091666667	0.091666667	0.191666667	0.116666667	0.179166667	0.175	0.204166667
09/02/2005 22:00:00	0	0	0.020833333	0	0	0	0.091666667	0.091666667	0.191666667	0.116666667	0.179166667	0.175	0.204166667
09/02/2005 23:00:00	0	0	0.020833333	0	0	0	0.091666667	0.091666667	0.191666667	0.116666667	0.179166667	0.175	0.204166667
10/02/2005 00:00:00	0	0	0.016666667	0	0	0	0	0	0	0	0	0	0
10/02/2005 01:00:00	0	0	0.016666667	0	0	0	0	0	0	0	0	0	0
10/02/2005 02:00:00	0	0	0.016666667	0	0	0	0	0	0	0	0	0	0
10/02/2005 03:00:00	0	0	0.016666667	0	0	0	0	0	0	0	0	0	0
10/02/2005 04:00:00	0	0	0.016666667	0	0	0	0	0	0	0	0	0	0
10/02/2005 05:00:00	0	0	0.016666667	0	0	0	0	0	0	0	0	0	0
10/02/2005 06:00:00	0	0	0.016666667	0	0	0	0	0	0	0	0	0	0
10/02/2005 07:00:00	0	0	0.016666667	0	0	0	0	0	0	0	0	0	0
10/02/2005 08:00:00	0	0	0.016666667	0	0	0	0	0	0	0	0	0	0
10/02/2005 09:00:00	0	0	0.016666667	0	0	0	0	0	0	0	0	0	0
10/02/2005 10:00:00	0	0	0.016666667	0	0	0	0	0	0	0	0	0	0
10/02/2005 11:00:00	0	0	0.016666667	0	0	0	0	0	0	0	0	0	0
10/02/2005 12:00:00	0	0	0.016666667	0	0	0	0	0	0	0	0	0	0
10/02/2005 13:00:00	0	0	0.016666667	0	0	0	0	0	0	0	0	0	0
10/02/2005 14:00:00	0	0	0.016666667	0	0	0	0	0	0	0	0	0	0
10/02/2005 15:00:00	0	0	0.016666667	0	0	0	0	0	0	0	0	0	0
10/02/2005 16:00:00	0	0	0.016666667	0	0	0	0	0	0	0	0	0	0
10/02/2005 17:00:00	0	0	0.016666667	0	0	0	0	0	0	0	0	0	0
10/02/2005 18:00:00	0	0	0.016666667	0	0	0	0	0	0	0	0	0	0
10/02/2005 19:00:00	0	0	0.016666667	0	0	0	0	0	0	0	0	0	0
10/02/2005 20:00:00	0	0	0.016666667	0	0	0	0	0	0	0	0	0	0
10/02/2005 21:00:00	0	0	0.016666667	0	0	0	0	0	0	0	0	0	0
10/02/2005 22:00:00	0	0	0.016666667	0	0	0	0	0	0	0	0	0	0
10/02/2005 23:00:00	0	0	0.016666667	0	0	0	0	0	0	0	0	0	0
11/02/2005 00:00:00	0.345833333	0.191666667	0.254166667	0.25	0.254166667	0.3125	0.370833333	0.2875	0.3375	0.229166667	0.241666667	0.216666667	0.220833333
11/02/2005 01:00:00	0.345833333	0.191666667	0.254166667	0.25	0.254166667	0.3125	0.370833333	0.2875	0.3375	0.229166667	0.241666667	0.216666667	0.220833333
11/02/2005 02:00:00	0.345833333	0.191666667	0.254166667	0.25	0.254166667	0.3125	0.370833333	0.2875	0.3375	0.229166667	0.241666667	0.216666667	0.220833333
11/02/2005 03:00:00	0.345833333	0.191666667	0.254166667	0.25	0.254166667	0.3125	0.370833333	0.2875	0.3375	0.229166667	0.241666667	0.216666667	0.220833333
11/02/2005 04:00:00	0.345833333	0.191666667	0.254166667	0.25	0.254166667	0.3125	0.370833333	0.2875	0.3375	0.229166667	0.241666667	0.216666667	0.220833333
11/02/2005 05:00:00	0.345833333	0.191666667	0.254166667	0.25	0.254166667	0.3125	0.370833333	0.2875	0.3375	0.229166667	0.241666667	0.216666667	0.220833333
11/02/2005 06:00:00	0.345833333	0.191666667	0.254166667	0.25	0.254166667	0.3125	0.370833333	0.2875	0.3375	0.229166667	0.241666667	0.216666667	0.220833333
11/02/2005 07:00:00	0.345833333	0.191666667	0.254166667	0.25	0.254166667	0.3125	0.370833333	0.2875	0.3375	0.229166667	0.241666667	0.216666667	0.220833333
11/02/2005 08:00:00	0.345833333	0.191666667	0.254166667	0.25	0.254166667	0.3125	0.370833333	0.2875	0.3375	0.229166667	0.241666667	0.216666667	0.220833333
11/02/2005 09:00:00	0.345833333	0.191666667	0.254166667	0.25	0.254166667	0.3125	0.370833333	0.2875	0.3375	0.229166667	0.241666667	0.216666667	0.220833333
11/02/2005 10:00:00	0.345833333	0.191666667	0.254166667	0.25	0.254166667	0.3125	0.370833333	0.2875	0.3375	0.229166667	0.241666667	0.216666667	0.220833333
11/02/2005 11:00:00	0.345833333	0.191666667	0.254166667	0.25	0.254166667	0.3125	0.370833333	0.2875	0.3375	0.229166667	0.241666667	0.216666667	0.220833333
11/02/2005 12:00:00	0.345833333	0.191666667	0.254166667	0.25	0.254166667	0.3125	0.370833333	0.2875	0.3375	0.229166667	0.241666667	0.216666667	0.220833333
11/02/2005 13:00:00	0.345833333	0.191666667	0.254166667	0.25	0.254166667	0.3125	0.370833333	0.2875	0.3375	0.229166667	0.241666667	0.216666667	0.220833333
11/02/2005 14:00:00	0.345833333	0.191666667	0.254166667	0.25	0.254166667	0.3125	0.370833333	0.2875	0.3375	0.229166667	0.241666667	0.216666667	0.220833333
11/02/2005 15:00:00	0.345833333	0.191666667	0.254166667	0.25	0.254166667	0.3125	0.370833333	0.2875	0.3375	0.229166667	0.241666667	0.216666667	0.220833333
11/02/2005 16:00:00	0.345833333	0.191666667	0.254166667	0.25	0.254166667	0.3125	0.370833333	0.2875	0.3375	0.229166667	0.241666667	0.216666667	0.220833333
11/02/2005 17:00:00	0.345833333	0.191666667	0.254166667	0.25	0.254166667	0.3125	0.370833333	0.2875	0.3375	0.229166667	0.241666667	0.216666667	0.220833333
11/02/2005 18:00:00	0.345833333	0.191666667	0.254166667	0.25	0.254166667	0.3125	0.370833333	0.2875	0.3375	0.229166667	0.241666667	0.216666667	0.220833333
11/02/2005 19:00:00	0.345833333	0.191666667	0.254166667	0.25	0.254166667	0.3125	0.370833333	0.2875	0.3375	0.229166667	0.241666667	0.216666667	0.220833333
11/02/2005 20:00:00	0.345833333	0.191666667	0.254166667	0.25	0.254166667	0.3125	0.370833333	0.2875	0.3375	0.229166667	0.241666667	0.216666667	0.220833333
11/02/2005 21:00:00	0.345833333	0.191666667	0.254166667	0.25	0.254166667	0.3125	0.370833333	0.2875	0.3375	0.229166667	0.241666667	0.216666667	0.220833333
11/02/2005 22:00:00	0.345833333	0.191666667	0.254166667	0.25	0.254166667	0.3125	0.370833333	0.2875	0.3375	0.229166667	0.241666667	0.216666667	0.220833333
11/02/2005 23:00:00	0.345833333	0.191666667	0.254166667	0.25	0.254166667	0.3125	0.370833333	0.2875	0.3375	0.229166667	0.241666667	0.216666667	0.220833333
12/02/2005 00:00:00	0	0	0	0	0	0	0.0125	0	0.008333333	0	0.004166667	0	0
12/02/2005 01:00:00	0	0	0	0	0	0	0.0125	0	0.008333333	0	0.004166667	0	0
12/02/2005 02:00:00	0	0	0	0	0	0	0.0125	0	0.008333333	0	0.004166667	0	0
12/02/2005 03:00:00	0	0	0	0	0	0	0.0125	0	0.008333333	0	0.004166667	0	0
12/02/2005 04:00:00	0	0	0	0	0	0	0.0125	0	0.008333333	0	0.004166667	0	0
12/02/2005 05:00:00	0	0	0	0	0	0	0.0125	0	0.008333333	0	0.004166667	0	0
12/02/2005 06:00:00	0	0	0	0	0	0	0.0125	0	0.008333333	0	0.004166667	0	0
12/02/2005 07:00:00	0	0	0	0	0	0	0.0125	0	0.008333333	0	0.004166667	0	0
12/02/2005 08:00:00	0	0	0	0	0	0	0.0125	0	0.008333333	0	0.004166667	0	0
12/02/2005 09:00:00	0	0	0	0	0	0	0.0125	0	0.008333333	0	0.004166667	0	0
12/02/2005 10:00:00	0	0	0	0	0	0	0.0125	0	0.008333333	0	0.004166667	0	0
12/02/2005 11:00:00	0	0	0	0	0	0	0.0125	0	0.008333333	0	0.004166667	0	0
12/02/2005 12:00:00	0	0	0	0	0	0	0.0125	0	0.008333333	0	0.004166667	0	0
12/02/2005 13:00:00	0	0	0	0	0	0	0.0125	0	0.008333333	0	0.004166667	0	0
12/02/2005 14:00:00	0	0	0	0	0	0	0.0125	0	0.008333333	0	0.004166667	0	0
12/02/2005 15:00:00	0	0	0	0	0	0	0.0125	0	0.008333333	0	0.004166667	0	0
12/02/2005 16:00:00	0	0	0	0	0	0	0.0125	0	0.008333333	0	0.004166667	0	0
12/02/2005 17:00:00	0	0	0	0	0	0	0.0125	0	0.008333333	0	0.004166667	0	0
12/02/2005 18:00:00	0	0	0	0	0	0	0.0125	0	0.008333333	0	0.004166667	0	0
12/02/2005 19:00:00	0	0	0	0	0	0	0.0125	0	0.008333333	0	0.004166667	0	0
12/02/2005 20:00:00	0	0	0	0	0	0	0.0125	0	0.008333333	0	0.004166667	0	0
12/02/2005 21:00:00	0	0	0	0	0	0	0.0125	0	0.008333333	0	0.004166667	0	0
12/02/2005 22:00:00	0	0	0	0	0	0	0.0125	0	0.008333333	0	0.004166667	0	0
12/02/2005 23:00:00	0	0	0	0	0	0	0.0125	0	0.008333333	0	0.004166667	0	0
13/02/2005 00:00:00	0.125	0.141666667	0.120833333	0.1125	0.175	0.1875	0.079166667	0.204166667	0.266666667	0.241666667	0.2125	0.225	0.470833333
13/02/2005 01:00:00	0.125	0.141666667	0.120833333	0.1125	0.175	0.1875	0.079166667	0.204166667	0.266666667	0.241666667	0.2125	0.225	0.470833333
13/02/2005 02:00:00	0.125	0.141666667	0.120833333	0.1125	0.175	0.1875	0.079166667	0.204166667	0.266666667	0.241666667	0.2125	0.225	0.470833333
13/02/2005 03:00:00	0.125	0.141666667	0.120833333	0.1125	0.175	0.1875	0.079166667	0.204166667	0.266666667	0.241666667	0.2125	0.225	0.470833333
13/02/2005 04:00:00	0.125	0.141666667	0.120833333	0.1125	0.175	0.1875	0.079166667	0.204166667	0.266666667	0.241666667	0.2125	0.225	0.470833333
13/02/2005 05:00:00	0.125	0.141666667	0.120833333	0.1125	0.175	0.1875	0.079166667	0.204166667	0.266666667	0.241666667	0.2125	0.225	0.470833333
13/02/2005 06:00:00	0.125	0.141666667	0.120833333	0.1125	0.175	0.1875	0.079166667	0.204166667	0.266666667	0.241666667	0.2125	0.225	0.470833333
13/02/2005 07:00:00	0.125	0.141666667	0.120833333	0.1125	0.175	0.1875	0.079166667	0.204166667	0.266666667	0.241666667	0.2125	0.225	0.470833333
13/02/2005 08:00:00	0.125	0.141666667	0.120833333	0.1125	0.175	0.1875	0.079166667	0.204166667	0.266666667	0.241666667	0.2125	0.225	0.470833333
13/02/2005 09:00:00	0.125	0.141666667	0.120833333	0.1125	0.175	0.1875	0.079166667	0.204166667	0.266666667	0.241666667	0.2125	0.225	0.470833333
13/02/2005 10:00:00	0.125	0.141666667	0.120833333	0.1125	0.175	0.1875	0.079166667	0.204166667	0.266666667	0.241666667	0.2125	0.225	0.470833333
13/02/2005 11:00:00	0.125	0.141666667	0.120833333	0.1125	0.175	0.1875	0.079166667	0.204166667	0.266666667	0.241666667	0.2125	0.225	0.470833333
13/02/2005 12:00:00	0.125	0.141666667	0.120833333	0.1125	0.175	0.1875	0.079166667	0.204166667	0.266666667	0.241666667	0.2125	0.225	0.470833333
13/02/2005 13:00:00	0.125	0.141666667	0.120833333	0.1125	0.175	0.1875	0.079166667	0.204166667	0.266666667	0.241666667	0.2125	0.225	0.470833333
13/02/2005 14:00:00	0.125	0.141666667	0.120833333	0.1125	0.175	0.1875	0.079166667	0.204166667	0.266666667	0.241666667	0.2125	0.225	0.470833333
13/02/2005 15:00:00	0.125	0.141666667	0.120833333	0.1125	0.175	0.1875	0.079166667	0.204166667	0.266666667	0.241666667	0.2125	0.225	0.470833333
13/02/2005 16:00:00	0.125	0.141666667	0.120833333	0.1125	0.175	0.1875	0.079166667	0.204166667	0.266666667	0.241666667	0.2125	0.225	0.470833333
13/02/2005 17:00:00	0.125	0.141666667	0.120833333	0.1125	0.175	0.1875	0.079166667	0.204166667	0.266666667	0.241666667	0.2125	0.225	0.470833333
13/02/2005 18:00:00	0.125	0.141666667	0.120833333	0.1125	0.175	0.1875	0.079166667	0.204166667	0.266666667	0.241666667	0.2125	0.225	0.470833333
13/02/2005 19:00:00	0.125	0.141666667	0.120833333	0.1125	0.175	0.1875	0.079166667	0.204166667	0.266666667	0.241666667	0.2125	0.225	0.470833333
13/02/2005 20:00:00	0.125	0.141666667	0.120833333	0.1125	0.175	0.1875	0.079166667	0.204166667	0.266666667	0.241666667	0.2125	0.225	0.470833333
13/02/2005 21:00:00	0.125	0.141666667	0.120833333	0.1125	0.175	0.1875	0.079166667	0.204166667	0.266666667	0.241666667	0.2125	0.225	0.470833333
13/02/2005 22:00:00	0.125	0.141666667	0.120833333	0.1125	0.175	0.1875	0.079166667	0.204166667	0.266666667	0.241666667	0.2125	0.225	0.470833333
13/02/2005 23:00:00	0.125	0.141666667	0.120833333	0.1125	0.175	0.1875	0.079166667	0.204166667	0.266666667	0.241666667	0.2125	0.225	0.470833333
14/02/2005 00:00:00	0.4375	0.179166667	0.070833333	0.383333333	0.379166667	0.291666667	0.708333333	0.583333333	0.804166667	0.675	0.741666667	0.55	0.995833333
14/02/2005 01:00:00	0.4375	0.179166667	0.070833333	0.383333333	0.379166667	0.291666667	0.708333333	0.583333333	0.804166667	0.675	0.741666667	0.55	0.995833333
14/02/2005 02:00:00	0.4375	0.179166667	0.070833333	0.383333333	0.379166667	0.291666667	0.708333333	0.583333333	0.804166667	0.675	0.741666667	0.55	0.995833333
14/02/2005 03:00:00	0.4375	0.179166667	0.070833333	0.383333333	0.379166667	0.291666667	0.708333333	0.583333333	0.804166667	0.675	0.741666667	0.55	0.995833333
14/02/2005 04:00:00	0.4375	0.179166667	0.070833333	0.383333333	0.379166667	0.291666667	0.708333333	0.583333333	0.804166667	0.675	0.741666667	0.55	0.995833333
14/02/2005 05:00:00	0.4375	0.179166667	0.070833333	0.383333333	0.379166667	0.291666667	0.708333333	0.583333333	0.804166667	0.675	0.741666667	0.55	0.995833333
14/02/2005 06:00:00	0.4375	0.179166667	0.070833333	0.383333333	0.379166667	0.291666667	0.708333333	0.583333333	0.804166667	0.675	0.741666667	0.55	0.995833333
14/02/2005 07:00:00	0.4375	0.179166667	0.070833333	0.383333333	0.379166667	0.291666667	0.708333333	0.583333333	0.804166667	0.675	0.741666667	0.55	0.995833333
14/02/2005 08:00:00	0.4375	0.179166667	0.070833333	0.383333333	0.379166667	0.291666667	0.708333333	0.583333333	0.804166667	0.675	0.741666667	0.55	0.995833333
14/02/2005 09:00:00	0.4375	0.179166667	0.070833333	0.383333333	0.379166667	0.291666667	0.708333333	0.583333333	0.804166667	0.675	0.741666667	0.55	0.995833333
14/02/2005 10:00:00	0.4375	0.179166667	0.070833333	0.383333333	0.379166667	0.291666667	0.708333333	0.583333333	0.804166667	0.675	0.741666667	0.55	0.995833333
14/02/2005 11:00:00	0.4375	0.179166667	0.070833333	0.383333333	0.379166667	0.291666667	0.708333333	0.583333333	0.804166667	0.675	0.741666667	0.55	0.995833333
14/02/2005 12:00:00	0.4375	0.179166667	0.070833333	0.383333333	0.379166667	0.291666667	0.708333333	0.583333333	0.804166667	0.675	0.741666667	0.55	0.995833333
14/02/2005 13:00:00	0.4375	0.179166667	0.070833333	0.383333333	0.379166667	0.291666667	0.708333333	0.583333333	0.804166667	0.675	0.741666667	0.55	0.995833333
14/02/2005 14:00:00	0.4375	0.179166667	0.070833333	0.383333333	0.379166667	0.291666667	0.708333333	0.583333333	0.804166667	0.675	0.741666667	0.55	0.995833333
14/02/2005 15:00:00	0.4375	0.179166667	0.070833333	0.383333333	0.379166667	0.291666667	0.708333333	0.583333333	0.804166667	0.675	0.741666667	0.55	0.995833333
14/02/2005 16:00:00	0.4375	0.179166667	0.070833333	0.383333333	0.379166667	0.291666667	0.708333333	0.583333333	0.804166667	0.675	0.741666667	0.55	0.995833333
14/02/2005 17:00:00	0.4375	0.179166667	0.070833333	0.383333333	0.379166667	0.291666667	0.708333333	0.583333333	0.804166667	0.675	0.741666667	0.55	0.995833333
14/02/2005 18:00:00	0.4375	0.179166667	0.070833333	0.383333333	0.379166667	0.291666667	0.708333333	0.583333333	0.804166667	0.675	0.741666667	0.55	0.995833333
14/02/2005 19:00:00	0.4375	0.179166667	0.070833333	0.383333333	0.379166667	0.291666667	0.708333333	0.583333333	0.804166667	0.675	0.741666667	0.55	0.995833333
14/02/2005 20:00:00	0.4375	0.179166667	0.070833333	0.383333333	0.379166667	0.291666667	0.708333333	0.583333333	0.804166667	0.675	0.741666667	0.55	0.995833333
14/02/2005 21:00:00	0.4375	0.179166667	0.070833333	0.383333333	0.379166667	0.291666667	0.708333333	0.583333333	0.804166667	0.675	0.741666667	0.55	0.995833333
14/02/2005 22:00:00	0.4375	0.179166667	0.070833333	0.383333333	0.379166667	0.291666667	0.708333333	0.583333333	0.804166667	0.675	0.741666667	0.55	0.995833333
14/02/2005 23:00:00	0.4375	0.179166667	0.070833333	0.383333333	0.379166667	0.291666667	0.708333333	0.583333333	0.804166667	0.675	0.741666667	0.55	0.995833333
15/02/2005 00:00:00	0	0.008333333	0	0.054166667	0.066666667	0.041666667	0	0.041666667	0.041666667	0.075	0.041666667	0.066666667	0.054166667
15/02/2005 01:00:00	0	0.008333333	0	0.054166667	0.066666667	0.041666667	0	0.041666667	0.041666667	0.075	0.041666667	0.066666667	0.054166667
15/02/2005 02:00:00	0	0.008333333	0	0.054166667	0.066666667	0.041666667	0	0.041666667	0.041666667	0.075	0.041666667	0.066666667	0.054166667
15/02/2005 03:00:00	0	0.008333333	0	0.054166667	0.066666667	0.041666667	0	0.041666667	0.041666667	0.075	0.041666667	0.066666667	0.054166667
15/02/2005 04:00:00	0	0.008333333	0	0.054166667	0.066666667	0.041666667	0	0.041666667	0.041666667	0.075	0.041666667	0.066666667	0.054166667
15/02/2005 05:00:00	0	0.008333333	0	0.054166667	0.066666667	0.041666667	0	0.041666667	0.041666667	0.075	0.041666667	0.066666667	0.054166667
15/02/2005 06:00:00	0	0.008333333	0	0.054166667	0.066666667	0.041666667	0	0.041666667	0.041666667	0.075	0.041666667	0.066666667	0.054166667
15/02/2005 07:00:00	0	0.008333333	0	0.054166667	0.066666667	0.041666667	0	0.041666667	0.041666667	0.075	0.041666667	0.066666667	0.054166667
15/02/2005 08:00:00	0	0.008333333	0	0.054166667	0.066666667	0.041666667	0	0.041666667	0.041666667	0.075	0.041666667	0.066666667	0.054166667
15/02/2005 09:00:00	0	0.008333333	0	0.054166667	0.066666667	0.041666667	0	0.041666667	0.041666667	0.075	0.041666667	0.066666667	0.054166667
15/02/2005 10:00:00	0	0.008333333	0	0.054166667	0.066666667	0.041666667	0	0.041666667	0.041666667	0.075	0.041666667	0.066666667	0.054166667
15/02/2005 11:00:00	0	0.008333333	0	0.054166667	0.066666667	0.041666667	0	0.041666667	0.041666667	0.075	0.041666667	0.066666667	0.054166667
15/02/2005 12:00:00	0	0.008333333	0	0.054166667	0.066666667	0.041666667	0	0.041666667	0.041666667	0.075	0.041666667	0.066666667	0.054166667
15/02/2005 13:00:00	0	0.008333333	0	0.054166667	0.066666667	0.041666667	0	0.041666667	0.041666667	0.075	0.041666667	0.066666667	0.054166667
15/02/2005 14:00:00	0	0.008333333	0	0.054166667	0.066666667	0.041666667	0	0.041666667	0.041666667	0.075	0.041666667	0.066666667	0.054166667
15/02/2005 15:00:00	0	0.008333333	0	0.054166667	0.066666667	0.041666667	0	0.041666667	0.041666667	0.075	0.041666667	0.066666667	0.054166667
15/02/2005 16:00:00	0	0.008333333	0	0.054166667	0.066666667	0.041666667	0	0.041666667	0.041666667	0.075	0.041666667	0.066666667	0.054166667
15/02/2005 17:00:00	0	0.008333333	0	0.054166667	0.066666667	0.041666667	0	0.041666667	0.041666667	0.075	0.041666667	0.066666667	0.054166667
15/02/2005 18:00:00	0	0.008333333	0	0.054166667	0.066666667	0.041666667	0	0.041666667	0.041666667	0.075	0.041666667	0.066666667	0.054166667
15/02/2005 19:00:00	0	0.008333333	0	0.054166667	0.066666667	0.041666667	0	0.041666667	0.041666667	0.075	0.041666667	0.066666667	0.054166667
15/02/2005 20:00:00	0	0.008333333	0	0.054166667	0.066666667	0.041666667	0	0.041666667	0.041666667	0.075	0.041666667	0.066666667	0.054166667
15/02/2005 21:00:00	0	0.008333333	0	0.054166667	0.066666667	0.041666667	0	0.041666667	0.041666667	0.075	0.041666667	0.066666667	0.054166667
15/02/2005 22:00:00	0	0.008333333	0	0.054166667	0.066666667	0.041666667	0	0.041666667	0.041666667	0.075	0.041666667	0.066666667	0.054166667
15/02/2005 23:00:00	0	0.008333333	0	0.054166667	0.066666667	0.041666667	0	0.041666667	0.041666667	0.075	0.041666667	0.066666667	0.054166667
16/02/2005 00:00:00	0.0625	0	0	0.0125	0	0	0	0	0.008333333	0	0	0	0.045833333
16/02/2005 01:00:00	0.0625	0	0	0.0125	0	0	0	0	0.008333333	0	0	0	0.045833333
16/02/2005 02:00:00	0.0625	0	0	0.0125	0	0	0	0	0.008333333	0	0	0	0.045833333
16/02/2005 03:00:00	0.0625	0	0	0.0125	0	0	0	0	0.008333333	0	0	0	0.045833333
16/02/2005 04:00:00	0.0625	0	0	0.0125	0	0	0	0	0.008333333	0	0	0	0.045833333
16/02/2005 05:00:00	0.0625	0	0	0.0125	0	0	0	0	0.008333333	0	0	0	0.045833333
16/02/2005 06:00:00	0.0625	0	0	0.0125	0	0	0	0	0.008333333	0	0	0	0.045833333
16/02/2005 07:00:00	0.0625	0	0	0.0125	0	0	0	0	0.008333333	0	0	0	0.045833333
16/02/2005 08:00:00	0.0625	0	0	0.0125	0	0	0	0	0.008333333	0	0	0	0.045833333
16/02/2005 09:00:00	0.0625	0	0	0.0125	0	0	0	0	0.008333333	0	0	0	0.045833333
16/02/2005 10:00:00	0.0625	0	0	0.0125	0	0	0	0	0.008333333	0	0	0	0.045833333
16/02/2005 11:00:00	0.0625	0	0	0.0125	0	0	0	0	0.008333333	0	0	0	0.045833333
16/02/2005 12:00:00	0.0625	0	0	0.0125	0	0	0	0	0.008333333	0	0	0	0.045833333
16/02/2005 13:00:00	0.0625	0	0	0.0125	0	0	0	0	0.008333333	0	0	0	0.045833333
16/02/2005 14:00:00	0.0625	0	0	0.0125	0	0	0	0	0.008333333	0	0	0	0.045833333
16/02/2005 15:00:00	0.0625	0	0	0.0125	0	0	0	0	0.008333333	0	0	0	0.045833333
16/02/2005 16:00:00	0.0625	0	0	0.0125	0	0	0	0	0.008333333	0	0	0	0.045833333
16/02/2005 17:00:00	0.0625	0	0	0.0125	0	0	0	0	0.008333333	0	0	0	0.045833333
16/02/2005 18:00:00	0.0625	0	0	0.0125	0	0	0	0	0.008333333	0	0	0	0.045833333
16/02/2005 19:00:00	0.0625	0	0	0.0125	0	0	0	0	0.008333333	0	0	0	0.045833333
16/02/2005 20:00:00	0.0625	0	0	0.0125	0	0	0	0	0.008333333	0	0	0	0.045833333
16/02/2005 21:00:00	0.0625	0	0	0.0125	0	0	0	0	0.008333333	0	0	0	0.045833333
16/02/2005 22:00:00	0.0625	0	0	0.0125	0	0	0	0	0.008333333	0	0	0	0.045833333
16/02/2005 23:00:00	0.0625	0	0	0.0125	0	0	0	0	0.008333333	0	0	0	0.045833333
17/02/2005 00:00:00	0.041666667	0.045833333	0.079166667	0.016666667	0.05	0.020833333	0.125	0.079166667	0.133333333	0.2	0.079166667	0.075	0.233333333
17/02/2005 01:00:00	0.041666667	0.045833333	0.079166667	0.016666667	0.05	0.020833333	0.125	0.079166667	0.133333333	0.2	0.079166667	0.075	0.233333333
17/02/2005 02:00:00	0.041666667	0.045833333	0.079166667	0.016666667	0.05	0.020833333	0.125	0.079166667	0.133333333	0.2	0.079166667	0.075	0.233333333
17/02/2005 03:00:00	0.041666667	0.045833333	0.079166667	0.016666667	0.05	0.020833333	0.125	0.079166667	0.133333333	0.2	0.079166667	0.075	0.233333333
17/02/2005 04:00:00	0.041666667	0.045833333	0.079166667	0.016666667	0.05	0.020833333	0.125	0.079166667	0.133333333	0.2	0.079166667	0.075	0.233333333
17/02/2005 05:00:00	0.041666667	0.045833333	0.079166667	0.016666667	0.05	0.020833333	0.125	0.079166667	0.133333333	0.2	0.079166667	0.075	0.233333333
17/02/2005 06:00:00	0.041666667	0.045833333	0.079166667	0.016666667	0.05	0.020833333	0.125	0.079166667	0.133333333	0.2	0.079166667	0.075	0.233333333
17/02/2005 07:00:00	0.041666667	0.045833333	0.079166667	0.016666667	0.05	0.020833333	0.125	0.079166667	0.133333333	0.2	0.079166667	0.075	0.233333333
17/02/2005 08:00:00	0.041666667	0.045833333	0.079166667	0.016666667	0.05	0.020833333	0.125	0.079166667	0.133333333	0.2	0.079166667	0.075	0.233333333
17/02/2005 09:00:00	0.041666667	0.045833333	0.079166667	0.016666667	0.05	0.020833333	0.125	0.079166667	0.133333333	0.2	0.079166667	0.075	0.233333333
17/02/2005 10:00:00	0.041666667	0.045833333	0.079166667	0.016666667	0.05	0.020833333	0.125	0.079166667	0.133333333	0.2	0.079166667	0.075	0.233333333
17/02/2005 11:00:00	0.041666667	0.045833333	0.079166667	0.016666667	0.05	0.020833333	0.125	0.079166667	0.133333333	0.2	0.079166667	0.075	0.233333333
17/02/2005 12:00:00	0.041666667	0.045833333	0.079166667	0.016666667	0.05	0.020833333	0.125	0.079166667	0.133333333	0.2	0.079166667	0.075	0.233333333
17/02/2005 13:00:00	0.041666667	0.045833333	0.079166667	0.016666667	0.05	0.020833333	0.125	0.079166667	0.133333333	0.2	0.079166667	0.075	0.233333333
17/02/2005 14:00:00	0.041666667	0.045833333	0.079166667	0.016666667	0.05	0.020833333	0.125	0.079166667	0.133333333	0.2	0.079166667	0.075	0.233333333
17/02/2005 15:00:00	0.041666667	0.045833333	0.079166667	0.016666667	0.05	0.020833333	0.125	0.079166667	0.133333333	0.2	0.079166667	0.075	0.233333333
17/02/2005 16:00:00	0.041666667	0.045833333	0.079166667	0.016666667	0.05	0.020833333	0.125	0.079166667	0.133333333	0.2	0.079166667	0.075	0.233333333
17/02/2005 17:00:00	0.041666667	0.045833333	0.079166667	0.016666667	0.05	0.020833333	0.125	0.079166667	0.133333333	0.2	0.079166667	0.075	0.233333333
17/02/2005 18:00:00	0.041666667	0.045833333	0.079166667	0.016666667	0.05	0.020833333	0.125	0.079166667	0.133333333	0.2	0.079166667	0.075	0.233333333
17/02/2005 19:00:00	0.041666667	0.045833333	0.079166667	0.016666667	0.05	0.020833333	0.125	0.079166667	0.133333333	0.2	0.079166667	0.075	0.233333333
17/02/2005 20:00:00	0.041666667	0.045833333	0.079166667	0.016666667	0.05	0.020833333	0.125	0.079166667	0.133333333	0.2	0.079166667	0.075	0.233333333
17/02/2005 21:00:00	0.041666667	0.045833333	0.079166667	0.016666667	0.05	0.020833333	0.125	0.079166667	0.133333333	0.2	0.079166667	0.075	0.233333333
17/02/2005 22:00:00	0.041666667	0.045833333	0.079166667	0.016666667	0.05	0.020833333	0.125	0.079166667	0.133333333	0.2	0.079166667	0.075	0.233333333
17/02/2005 23:00:00	0.041666667	0.045833333	0.079166667	0.016666667	0.05	0.020833333	0.125	0.079166667	0.133333333	0.2	0.079166667	0.075	0.233333333
18/02/2005 00:00:00	0	0	0	0	0	0	0	0	0	0	0	0	0.016666667
18/02/2005 01:00:00	0	0	0	0	0	0	0	0	0	0	0	0	0.016666667
18/02/2005 02:00:00	0	0	0	0	0	0	0	0	0	0	0	0	0.016666667
18/02/2005 03:00:00	0	0	0	0	0	0	0	0	0	0	0	0	0.016666667
18/02/2005 04:00:00	0	0	0	0	0	0	0	0	0	0	0	0	0.016666667
18/02/2005 05:00:00	0	0	0	0	0	0	0	0	0	0	0	0	0.016666667
18/02/2005 06:00:00	0	0	0	0	0	0	0	0	0	0	0	0	0.016666667
18/02/2005 07:00:00	0	0	0	0	0	0	0	0	0	0	0	0	0.016666667
18/02/2005 08:00:00	0	0	0	0	0	0	0	0	0	0	0	0	0.016666667
18/02/2005 09:00:00	0	0	0	0	0	0	0	0	0	0	0	0	0.016666667
18/02/2005 10:00:00	0	0	0	0	0	0	0	0	0	0	0	0	0.016666667
18/02/2005 11:00:00	0	0	0	0	0	0	0	0	0	0	0	0	0.016666667
18/02/2005 12:00:00	0	0	0	0	0	0	0	0	0	0	0	0	0.016666667
18/02/2005 13:00:00	0	0	0	0	0	0	0	0	0	0	0	0	0.016666667
18/02/2005 14:00:00	0	0	0	0	0	0	0	0	0	0	0	0	0.016666667
18/02/2005 15:00:00	0	0	0	0	0	0	0	0	0	0	0	0	0.016666667
18/02/2005 16:00:00	0	0	0	0	0	0	0	0	0	0	0	0	0.016666667
18/02/2005 17:00:00	0	0	0	0	0	0	0	0	0	0	0	0	0.016666667
18/02/2005 18:00:00	0	0	0	0	0	0	0	0	0	0	0	0	0.016666667
18/02/2005 19:00:00	0	0	0	0	0	0	0	0	0	0	0	0	0.016666667
18/02/2005 20:00:00	0	0	0	0	0	0	0	0	0	0	0	0	0.016666667
18/02/2005 21:00:00	0	0	0	0	0	0	0	0	0	0	0	0	0.016666667
18/02/2005 22:00:00	0	0	0	0	0	0	0	0	0	0	0	0	0.016666667
18/02/2005 23:00:00	0	0	0	0	0	0	0	0	0	0	0	0	0.016666667
19/02/2005 00:00:00	0	0	0	0	0	0	0	0	0	0	0	0	0
19/02/2005 01:00:00	0	0	0	0	0	0	0	0	0	0	0	0	0
19/02/2005 02:00:00	0	0	0	0	0	0	0	0	0	0	0	0	0
19/02/2005 03:00:00	0	0	0	0	0	0	0	0	0	0	0	0	0
19/02/2005 04:00:00	0	0	0	0	0	0	0	0	0	0	0	0	0
19/02/2005 05:00:00	0	0	0	0	0	0	0	0	0	0	0	0	0
19/02/2005 06:00:00	0	0	0	0	0	0	0	0	0	0	0	0	0
19/02/2005 07:00:00	0	0	0	0	0	0	0	0	0	0	0	0	0
19/02/2005 08:00:00	0	0	0	0	0	0	0	0	0	0	0	0	0
19/02/2005 09:00:00	0	0	0	0	0	0	0	0	0	0	0	0	0
19/02/2005 10:00:00	0	0	0	0	0	0	0	0	0	0	0	0	0
19/02/2005 11:00:00	0	0	0	0	0	0	0	0	0	0	0	0	0
19/02/2005 12:00:00	0	0	0	0	0	0	0	0	0	0	0	0	0
19/02/2005 13:00:00	0	0	0	0	0	0	0	0	0	0	0	0	0
19/02/2005 14:00:00	0	0	0	0	0	0	0	0	0	0	0	0	0
19/02/2005 15:00:00	0	0	0	0	0	0	0	0	0	0	0	0	0
19/02/2005 16:00:00	0	0	0	0	0	0	0	0	0	0	0	0	0
19/02/2005 17:00:00	0	0	0	0	0	0	0	0	0	0	0	0	0
19/02/2005 18:00:00	0	0	0	0	0	0	0	0	0	0	0	0	0
19/02/2005 19:00:00	0	0	0	0	0	0	0	0	0	0	0	0	0
19/02/2005 20:00:00	0	0	0	0	0	0	0	0	0	0	0	0	0
19/02/2005 21:00:00	0	0	0	0	0	0	0	0	0	0	0	0	0
19/02/2005 22:00:00	0	0	0	0	0	0	0	0	0	0	0	0	0
19/02/2005 23:00:00	0	0	0	0	0	0	0	0	0	0	0	0	0
20/02/2005 00:00:00	0	0	0	0	0	0	0	0	0	0	0	0	0
20/02/2005 01:00:00	0	0	0	0	0	0	0	0	0	0	0	0	0
20/02/2005 02:00:00	0	0	0	0	0	0	0	0	0	0	0	0	0
20/02/2005 03:00:00	0	0	0	0	0	0	0	0	0	0	0	0	0
20/02/2005 04:00:00	0	0	0	0	0	0	0	0	0	0	0	0	0
20/02/2005 05:00:00	0	0	0	0	0	0	0	0	0	0	0	0	0
20/02/2005 06:00:00	0	0	0	0	0	0	0	0	0	0	0	0	0
20/02/2005 07:00:00	0	0	0	0	0	0	0	0	0	0	0	0	0
20/02/2005 08:00:00	0	0	0	0	0	0	0	0	0	0	0	0	0
20/02/2005 09:00:00	0	0	0	0	0	0	0	0	0	0	0	0	0
20/02/2005 10:00:00	0	0	0	0	0	0	0	0	0	0	0	0	0
20/02/2005 11:00:00	0	0	0	0	0	0	0	0	0	0	0	0	0
20/02/2005 12:00:00	0	0	0	0	0	0	0	0	0	0	0	0	0
20/02/2005 13:00:00	0	0	0	0	0	0	0	0	0	0	0	0	0
20/02/2005 14:00:00	0	0	0	0	0	0	0	0	0	0	0	0	0
20/02/2005 15:00:00	0	0	0	0	0	0	0	0	0	0	0	0	0
20/02/2005 16:00:00	0	0	0	0	0	0	0	0	0	0	0	0	0
20/02/2005 17:00:00	0	0	0	0	0	0	0	0	0	0	0	0	0
20/02/2005 18:00:00	0	0	0	0	0	0	0	0	0	0	0	0	0
20/02/2005 19:00:00	0	0	0	0	0	0	0	0	0	0	0	0	0
20/02/2005 20:00:00	0	0	0	0	0	0	0	0	0	0	0	0	0
20/02/2005 21:00:00	0	0	0	0	0	0	0	0	0	0	0	0	0
20/02/2005 22:00:00	0	0	0	0	0	0	0	0	0	0	0	0	0
20/02/2005 23:00:00	0	0	0	0	0	0	0	0	0	0	0	0	0
21/02/2005 00:00:00	0	0	0	0	0	0	0	0	0	0	0	0	0
21/02/2005 01:00:00	0	0	0	0	0	0	0	0	0	0	0	0	0
21/02/2005 02:00:00	0	0	0	0	0	0	0	0	0	0	0	0	0
21/02/2005 03:00:00	0	0	0	0	0	0	0	0	0	0	0	0	0
21/02/2005 04:00:00	0	0	0	0	0	0	0	0	0	0	0	0	0
21/02/2005 05:00:00	0	0	0	0	0	0	0	0	0	0	0	0	0
21/02/2005 06:00:00	0	0	0	0	0	0	0	0	0	0	0	0	0
21/02/2005 07:00:00	0	0	0	0	0	0	0	0	0	0	0	0	0
21/02/2005 08:00:00	0	0	0	0	0	0	0	0	0	0	0	0	0
21/02/2005 09:00:00	0	0	0	0	0	0	0	0	0	0	0	0	0
21/02/2005 10:00:00	0	0	0	0	0	0	0	0	0	0	0	0	0
21/02/2005 11:00:00	0	0	0	0	0	0	0	0	0	0	0	0	0
21/02/2005 12:00:00	0	0	0	0	0	0	0	0	0	0	0	0	0
21/02/2005 13:00:00	0	0	0	0	0	0	0	0	0	0	0	0	0
21/02/2005 14:00:00	0	0	0	0	0	0	0	0	0	0	0	0	0
21/02/2005 15:00:00	0	0	0	0	0	0	0	0	0	0	0	0	0
21/02/2005 16:00:00	0	0	0	0	0	0	0	0	0	0	0	0	0
21/02/2005 17:00:00	0	0	0	0	0	0	0	0	0	0	0	0	0
21/02/2005 18:00:00	0	0	0	0	0	0	0	0	0	0	0	0	0
21/02/2005 19:00:00	0	0	0	0	0	0	0	0	0	0	0	0	0
21/02/2005 20:00:00	0	0	0	0	0	0	0	0	0	0	0	0	0
21/02/2005 21:00:00	0	0	0	0	0	0	0	0	0	0	0	0	0
21/02/2005 22:00:00	0	0	0	0	0	0	0	0	0	0	0	0	0
21/02/2005 23:00:00	0	0	0	0	0	0	0	0	0	0	0	0	0
22/02/2005 00:00:00	0	0	0	0	0	0	0	0	0	0	0	0	0
22/02/2005 01:00:00	0	0	0	0	0	0	0	0	0	0	0	0	0
22/02/2005 02:00:00	0	0	0	0	0	0	0	0	0	0	0	0	0
22/02/2005 03:00:00	0	0	0	0	0	0	0	0	0	0	0	0	0
22/02/2005 04:00:00	0	0	0	0	0	0	0	0	0	0	0	0	0
22/02/2005 05:00:00	0	0	0	0	0	0	0	0	0	0	0	0	0
22/02/2005 06:00:00	0	0	0	0	0	0	0	0	0	0	0	0	0
22/02/2005 07:00:00	0	0	0	0	0	0	0	0	0	0	0	0	0
22/02/2005 08:00:00	0	0	0	0	0	0	0	0	0	0	0	0	0
22/02/2005 09:00:00	0	0	0	0	0	0	0	0	0	0	0	0	0
22/02/2005 10:00:00	0	0	0	0	0	0	0	0	0	0	0	0	0
22/02/2005 11:00:00	0	0	0	0	0	0	0	0	0	0	0	0	0
22/02/2005 12:00:00	0	0	0	0	0	0	0	0	0	0	0	0	0
22/02/2005 13:00:00	0	0	0	0	0	0	0	0	0	0	0	0	0
22/02/2005 14:00:00	0	0	0	0	0	0	0	0	0	0	0	0	0
22/02/2005 15:00:00	0	0	0	0	0	0	0	0	0	0	0	0	0
22/02/2005 16:00:00	0	0	0	0	0	0	0	0	0	0	0	0	0
22/02/2005 17:00:00	0	0	0	0	0	0	0	0	0	0	0	0	0
22/02/2005 18:00:00	0	0	0	0	0	0	0	0	0	0	0	0	0
22/02/2005 19:00:00	0	0	0	0	0	0	0	0	0	0	0	0	0
22/02/2005 20:00:00	0	0	0	0	0	0	0	0	0	0	0	0	0
22/02/2005 21:00:00	0	0	0	0	0	0	0	0	0	0	0	0	0
22/02/2005 22:00:00	0	0	0	0	0	0	0	0	0	0	0	0	0
22/02/2005 23:00:00	0	0	0	0	0	0	0	0	0	0	0	0	0
23/02/2005 00:00:00	0.0625	0	0.0625	0.079166667	0.083333333	0.095833333	0.204166667	0.2	0.254166667	0.204166667	0.2	0.15	0.204166667
23/02/2005 01:00:00	0.0625	0	0.0625	0.079166667	0.083333333	0.095833333	0.204166667	0.2	0.254166667	0.204166667	0.2	0.15	0.204166667
23/02/2005 02:00:00	0.0625	0	0.0625	0.079166667	0.083333333	0.095833333	0.204166667	0.2	0.254166667	0.204166667	0.2	0.15	0.204166667
23/02/2005 03:00:00	0.0625	0	0.0625	0.079166667	0.083333333	0.095833333	0.204166667	0.2	0.254166667	0.204166667	0.2	0.15	0.204166667
23/02/2005 04:00:00	0.0625	0	0.0625	0.079166667	0.083333333	0.095833333	0.204166667	0.2	0.254166667	0.204166667	0.2	0.15	0.204166667
23/02/2005 05:00:00	0.0625	0	0.0625	0.079166667	0.083333333	0.095833333	0.204166667	0.2	0.254166667	0.204166667	0.2	0.15	0.204166667
23/02/2005 06:00:00	0.0625	0	0.0625	0.079166667	0.083333333	0.095833333	0.204166667	0.2	0.254166667	0.204166667	0.2	0.15	0.204166667
23/02/2005 07:00:00	0.0625	0	0.0625	0.079166667	0.083333333	0.095833333	0.204166667	0.2	0.254166667	0.204166667	0.2	0.15	0.204166667
23/02/2005 08:00:00	0.0625	0	0.0625	0.079166667	0.083333333	0.095833333	0.204166667	0.2	0.254166667	0.204166667	0.2	0.15	0.204166667
23/02/2005 09:00:00	0.0625	0	0.0625	0.079166667	0.083333333	0.095833333	0.204166667	0.2	0.254166667	0.204166667	0.2	0.15	0.204166667
23/02/2005 10:00:00	0.0625	0	0.0625	0.079166667	0.083333333	0.095833333	0.204166667	0.2	0.254166667	0.204166667	0.2	0.15	0.204166667
23/02/2005 11:00:00	0.0625	0	0.0625	0.079166667	0.083333333	0.095833333	0.204166667	0.2	0.254166667	0.204166667	0.2	0.15	0.204166667
23/02/2005 12:00:00	0.0625	0	0.0625	0.079166667	0.083333333	0.095833333	0.204166667	0.2	0.254166667	0.204166667	0.2	0.15	0.204166667
23/02/2005 13:00:00	0.0625	0	0.0625	0.079166667	0.083333333	0.095833333	0.204166667	0.2	0.254166667	0.204166667	0.2	0.15	0.204166667
23/02/2005 14:00:00	0.0625	0	0.0625	0.079166667	0.083333333	0.095833333	0.204166667	0.2	0.254166667	0.204166667	0.2	0.15	0.204166667
23/02/2005 15:00:00	0.0625	0	0.0625	0.079166667	0.083333333	0.095833333	0.204166667	0.2	0.254166667	0.204166667	0.2	0.15	0.204166667
23/02/2005 16:00:00	0.0625	0	0.0625	0.079166667	0.083333333	0.095833333	0.204166667	0.2	0.254166667	0.204166667	0.2	0.15	0.204166667
23/02/2005 17:00:00	0.0625	0	0.0625	0.079166667	0.083333333	0.095833333	0.204166667	0.2	0.254166667	0.204166667	0.2	0.15	0.204166667
23/02/2005 18:00:00	0.0625	0	0.0625	0.079166667	0.083333333	0.095833333	0.204166667	0.2	0.254166667	0.204166667	0.2	0.15	0.204166667
23/02/2005 19:00:00	0.0625	0	0.0625	0.079166667	0.083333333	0.095833333	0.204166667	0.2	0.254166667	0.204166667	0.2	0.15	0.204166667
23/02/2005 20:00:00	0.0625	0	0.0625	0.079166667	0.083333333	0.095833333	0.204166667	0.2	0.254166667	0.204166667	0.2	0.15	0.204166667
23/02/2005 21:00:00	0.0625	0	0.0625	0.079166667	0.083333333	0.095833333	0.204166667	0.2	0.254166667	0.204166667	0.2	0.15	0.204166667
23/02/2005 22:00:00	0.0625	0	0.0625	0.079166667	0.083333333	0.095833333	0.204166667	0.2	0.254166667	0.204166667	0.2	0.15	0.204166667
23/02/2005 23:00:00	0.0625	0	0.0625	0.079166667	0.083333333	0.095833333	0.204166667	0.2	0.254166667	0.204166667	0.2	0.15	0.204166667
24/02/2005 00:00:00	0	0	0	0	0	0	0	0	0.016666667	0	0	0	0.054166667
24/02/2005 01:00:00	0	0	0	0	0	0	0	0	0.016666667	0	0	0	0.054166667
24/02/2005 02:00:00	0	0	0	0	0	0	0	0	0.016666667	0	0	0	0.054166667
24/02/2005 03:00:00	0	0	0	0	0	0	0	0	0.016666667	0	0	0	0.054166667
24/02/2005 04:00:00	0	0	0	0	0	0	0	0	0.016666667	0	0	0	0.054166667
24/02/2005 05:00:00	0	0	0	0	0	0	0	0	0.016666667	0	0	0	0.054166667
24/02/2005 06:00:00	0	0	0	0	0	0	0	0	0.016666667	0	0	0	0.054166667
24/02/2005 07:00:00	0	0	0	0	0	0	0	0	0.016666667	0	0	0	0.054166667
24/02/2005 08:00:00	0	0	0	0	0	0	0	0	0.016666667	0	0	0	0.054166667
24/02/2005 09:00:00	0	0	0	0	0	0	0	0	0.016666667	0	0	0	0.054166667
24/02/2005 10:00:00	0	0	0	0	0	0	0	0	0.016666667	0	0	0	0.054166667
24/02/2005 11:00:00	0	0	0	0	0	0	0	0	0.016666667	0	0	0	0.054166667
24/02/2005 12:00:00	0	0	0	0	0	0	0	0	0.016666667	0	0	0	0.054166667
24/02/2005 13:00:00	0	0	0	0	0	0	0	0	0.016666667	0	0	0	0.054166667
24/02/2005 14:00:00	0	0	0	0	0	0	0	0	0.016666667	0	0	0	0.054166667
24/02/2005 15:00:00	0	0	0	0	0	0	0	0	0.016666667	0	0	0	0.054166667
24/02/2005 16:00:00	0	0	0	0	0	0	0	0	0.016666667	0	0	0	0.054166667
24/02/2005 17:00:00	0	0	0	0	0	0	0	0	0.016666667	0	0	0	0.054166667
24/02/2005 18:00:00	0	0	0	0	0	0	0	0	0.016666667	0	0	0	0.054166667
24/02/2005 19:00:00	0	0	0	0	0	0	0	0	0.016666667	0	0	0	0.054166667
24/02/2005 20:00:00	0	0	0	0	0	0	0	0	0.016666667	0	0	0	0.054166667
24/02/2005 21:00:00	0	0	0	0	0	0	0	0	0.016666667	0	0	0	0.054166667
24/02/2005 22:00:00	0	0	0	0	0	0	0	0	0.016666667	0	0	0	0.054166667
24/02/2005 23:00:00	0	0	0	0	0	0	0	0	0.016666667	0	0	0	0.054166667
25/02/2005 00:00:00	0	0	0	0	0	0	0	0	0.0625	0	0.004166667	0	0.070833333
25/02/2005 01:00:00	0	0	0	0	0	0	0	0	0.0625	0	0.004166667	0	0.070833333
25/02/2005 02:00:00	0	0	0	0	0	0	0	0	0.0625	0	0.004166667	0	0.070833333
25/02/2005 03:00:00	0	0	0	0	0	0	0	0	0.0625	0	0.004166667	0	0.070833333
25/02/2005 04:00:00	0	0	0	0	0	0	0	0	0.0625	0	0.004166667	0	0.070833333
25/02/2005 05:00:00	0	0	0	0	0	0	0	0	0.0625	0	0.004166667	0	0.070833333
25/02/2005 06:00:00	0	0	0	0	0	0	0	0	0.0625	0	0.004166667	0	0.070833333
25/02/2005 07:00:00	0	0	0	0	0	0	0	0	0.0625	0	0.004166667	0	0.070833333
25/02/2005 08:00:00	0	0	0	0	0	0	0	0	0.0625	0	0.004166667	0	0.070833333
25/02/2005 09:00:00	0	0	0	0	0	0	0	0	0.0625	0	0.004166667	0	0.070833333
25/02/2005 10:00:00	0	0	0	0	0	0	0	0	0.0625	0	0.004166667	0	0.070833333
25/02/2005 11:00:00	0	0	0	0	0	0	0	0	0.0625	0	0.004166667	0	0.070833333
25/02/2005 12:00:00	0	0	0	0	0	0	0	0	0.0625	0	0.004166667	0	0.070833333
25/02/2005 13:00:00	0	0	0	0	0	0	0	0	0.0625	0	0.004166667	0	0.070833333
25/02/2005 14:00:00	0	0	0	0	0	0	0	0	0.0625	0	0.004166667	0	0.070833333
25/02/2005 15:00:00	0	0	0	0	0	0	0	0	0.0625	0	0.004166667	0	0.070833333
25/02/2005 16:00:00	0	0	0	0	0	0	0	0	0.0625	0	0.004166667	0	0.070833333
25/02/2005 17:00:00	0	0	0	0	0	0	0	0	0.0625	0	0.004166667	0	0.070833333
25/02/2005 18:00:00	0	0	0	0	0	0	0	0	0.0625	0	0.004166667	0	0.070833333
25/02/2005 19:00:00	0	0	0	0	0	0	0	0	0.0625	0	0.004166667	0	0.070833333
25/02/2005 20:00:00	0	0	0	0	0	0	0	0	0.0625	0	0.004166667	0	0.070833333
25/02/2005 21:00:00	0	0	0	0	0	0	0	0	0.0625	0	0.004166667	0	0.070833333
25/02/2005 22:00:00	0	0	0	0	0	0	0	0	0.0625	0	0.004166667	0	0.070833333
25/02/2005 23:00:00	0	0	0	0	0	0	0	0	0.0625	0	0.004166667	0	0.070833333
26/02/2005 00:00:00	0	0	0	0	0	0	0	0	0	0	0	0	0
26/02/2005 01:00:00	0	0	0	0	0	0	0	0	0	0	0	0	0
26/02/2005 02:00:00	0	0	0	0	0	0	0	0	0	0	0	0	0
26/02/2005 03:00:00	0	0	0	0	0	0	0	0	0	0	0	0	0
26/02/2005 04:00:00	0	0	0	0	0	0	0	0	0	0	0	0	0
26/02/2005 05:00:00	0	0	0	0	0	0	0	0	0	0	0	0	0
26/02/2005 06:00:00	0	0	0	0	0	0	0	0	0	0	0	0	0
26/02/2005 07:00:00	0	0	0	0	0	0	0	0	0	0	0	0	0
26/02/2005 08:00:00	0	0	0	0	0	0	0	0	0	0	0	0	0
26/02/2005 09:00:00	0	0	0	0	0	0	0	0	0	0	0	0	0
26/02/2005 10:00:00	0	0	0	0	0	0	0	0	0	0	0	0	0
26/02/2005 11:00:00	0	0	0	0	0	0	0	0	0	0	0	0	0
26/02/2005 12:00:00	0	0	0	0	0	0	0	0	0	0	0	0	0
26/02/2005 13:00:00	0	0	0	0	0	0	0	0	0	0	0	0	0
26/02/2005 14:00:00	0	0	0	0	0	0	0	0	0	0	0	0	0
26/02/2005 15:00:00	0	0	0	0	0	0	0	0	0	0	0	0	0
26/02/2005 16:00:00	0	0	0	0	0	0	0	0	0	0	0	0	0
26/02/2005 17:00:00	0	0	0	0	0	0	0	0	0	0	0	0	0
26/02/2005 18:00:00	0	0	0	0	0	0	0	0	0	0	0	0	0
26/02/2005 19:00:00	0	0	0	0	0	0	0	0	0	0	0	0	0
26/02/2005 20:00:00	0	0	0	0	0	0	0	0	0	0	0	0	0
26/02/2005 21:00:00	0	0	0	0	0	0	0	0	0	0	0	0	0
26/02/2005 22:00:00	0	0	0	0	0	0	0	0	0	0	0	0	0
26/02/2005 23:00:00	0	0	0	0	0	0	0	0	0	0	0	0	0
27/02/2005 00:00:00	0	0	0	0	0	0	0	0	0	0	0	0	0
27/02/2005 01:00:00	0	0	0	0	0	0	0	0	0	0	0	0	0
27/02/2005 02:00:00	0	0	0	0	0	0	0	0	0	0	0	0	0
27/02/2005 03:00:00	0	0	0	0	0	0	0	0	0	0	0	0	0
27/02/2005 04:00:00	0	0	0	0	0	0	0	0	0	0	0	0	0
27/02/2005 05:00:00	0	0	0	0	0	0	0	0	0	0	0	0	0
27/02/2005 06:00:00	0	0	0	0	0	0	0	0	0	0	0	0	0
27/02/2005 07:00:00	0	0	0	0	0	0	0	0	0	0	0	0	0
27/02/2005 08:00:00	0	0	0	0	0	0	0	0	0	0	0	0	0
27/02/2005 09:00:00	0	0	0	0	0	0	0	0	0	0	0	0	0
27/02/2005 10:00:00	0	0	0	0	0	0	0	0	0	0	0	0	0
27/02/2005 11:00:00	0	0	0	0	0	0	0	0	0	0	0	0	0
27/02/2005 12:00:00	0	0	0	0	0	0	0	0	0	0	0	0	0
27/02/2005 13:00:00	0	0	0	0	0	0	0	0	0	0	0	0	0
27/02/2005 14:00:00	0	0	0	0	0	0	0	0	0	0	0	0	0
27/02/2005 15:00:00	0	0	0	0	0	0	0	0	0	0	0	0	0
27/02/2005 16:00:00	0	0	0	0	0	0	0	0	0	0	0	0	0
27/02/2005 17:00:00	0	0	0	0	0	0	0	0	0	0	0	0	0
27/02/2005 18:00:00	0	0	0	0	0	0	0	0	0	0	0	0	0
27/02/2005 19:00:00	0	0	0	0	0	0	0	0	0	0	0	0	0
27/02/2005 20:00:00	0	0	0	0	0	0	0	0	0	0	0	0	0
27/02/2005 21:00:00	0	0	0	0	0	0	0	0	0	0	0	0	0
27/02/2005 22:00:00	0	0	0	0	0	0	0	0	0	0	0	0	0
27/02/2005 23:00:00	0	0	0	0	0	0	0	0	0	0	0	0	0
28/02/2005 00:00:00	0	0	0	0	0	0	0	0	0	0	0	0	0
28/02/2005 01:00:00	0	0	0	0	0	0	0	0	0	0	0	0	0
28/02/2005 02:00:00	0	0	0	0	0	0	0	0	0	0	0	0	0
28/02/2005 03:00:00	0	0	0	0	0	0	0	0	0	0	0	0	0
28/02/2005 04:00:00	0	0	0	0	0	0	0	0	0	0	0	0	0
28/02/2005 05:00:00	0	0	0	0	0	0	0	0	0	0	0	0	0
28/02/2005 06:00:00	0	0	0	0	0	0	0	0	0	0	0	0	0
28/02/2005 07:00:00	0	0	0	0	0	0	0	0	0	0	0	0	0
28/02/2005 08:00:00	0	0	0	0	0	0	0	0	0	0	0	0	0
28/02/2005 09:00:00	0	0	0	0	0	0	0	0	0	0	0	0	0
28/02/2005 10:00:00	0	0	0	0	0	0	0	0	0	0	0	0	0
28/02/2005 11:00:00	0	0	0	0	0	0	0	0	0	0	0	0	0
28/02/2005 12:00:00	0	0	0	0	0	0	0	0	0	0	0	0	0
28/02/2005 13:00:00	0	0	0	0	0	0	0	0	0	0	0	0	0
28/02/2005 14:00:00	0	0	0	0	0	0	0	0	0	0	0	0	0
28/02/2005 15:00:00	0	0	0	0	0	0	0	0	0	0	0	0	0
28/02/2005 16:00:00	0	0	0	0	0	0	0	0	0	0	0	0	0
28/02/2005 17:00:00	0	0	0	0	0	0	0	0	0	0	0	0	0
28/02/2005 18:00:00	0	0	0	0	0	0	0	0	0	0	0	0	0
28/02/2005 19:00:00	0	0	0	0	0	0	0	0	0	0	0	0	0
28/02/2005 20:00:00	0	0	0	0	0	0	0	0	0	0	0	0	0
28/02/2005 21:00:00	0	0	0	0	0	0	0	0	0	0	0	0	0
28/02/2005 22:00:00	0	0	0	0	0	0	0	0	0	0	0	0	0
28/02/2005 23:00:00	0	0	0	0	0	0	0	0	0	0	0	0	0
01/03/2005 00:00:00	0	0	0	0	0	0	0	0	0	0	0	0	0
01/03/2005 01:00:00	0	0	0	0	0	0	0	0	0	0	0	0	0
01/03/2005 02:00:00	0	0	0	0	0	0	0	0	0	0	0	0	0
01/03/2005 03:00:00	0	0	0	0	0	0	0	0	0	0	0	0	0
01/03/2005 04:00:00	0	0	0	0	0	0	0	0	0	0	0	0	0
01/03/2005 05:00:00	0	0	0	0	0	0	0	0	0	0	0	0	0
01/03/2005 06:00:00	0	0	0	0	0	0	0	0	0	0	0	0	0
01/03/2005 07:00:00	0	0	0	0	0	0	0	0	0	0	0	0	0
01/03/2005 08:00:00	0	0	0	0	0	0	0	0	0	0	0	0	0
01/03/2005 09:00:00	0	0	0	0	0	0	0	0	0	0	0	0	0
01/03/2005 10:00:00	0	0	0	0	0	0	0	0	0	0	0	0	0
01/03/2005 11:00:00	0	0	0	0	0	0	0	0	0	0	0	0	0
01/03/2005 12:00:00	0	0	0	0	0	0	0	0	0	0	0	0	0
01/03/2005 13:00:00	0	0	0	0	0	0	0	0	0	0	0	0	0
01/03/2005 14:00:00	0	0	0	0	0	0	0	0	0	0	0	0	0
01/03/2005 15:00:00	0	0	0	0	0	0	0	0	0	0	0	0	0
01/03/2005 16:00:00	0	0	0	0	0	0	0	0	0	0	0	0	0
01/03/2005 17:00:00	0	0	0	0	0	0	0	0	0	0	0	0	0
01/03/2005 18:00:00	0	0	0	0	0	0	0	0	0	0	0	0	0
01/03/2005 19:00:00	0	0	0	0	0	0	0	0	0	0	0	0	0
01/03/2005 20:00:00	0	0	0	0	0	0	0	0	0	0	0	0	0
01/03/2005 21:00:00	0	0	0	0	0	0	0	0	0	0	0	0	0
01/03/2005 22:00:00	0	0	0	0	0	0	0	0	0	0	0	0	0
01/03/2005 23:00:00	0	0	0	0	0	0	0	0	0	0	0	0	0
02/03/2005 00:00:00	0	0	0	0	0	0	0	0	0	0	0	0	0
02/03/2005 01:00:00	0	0	0	0	0	0	0	0	0	0	0	0	0
02/03/2005 02:00:00	0	0	0	0	0	0	0	0	0	0	0	0	0
02/03/2005 03:00:00	0	0	0	0	0	0	0	0	0	0	0	0	0
02/03/2005 04:00:00	0	0	0	0	0	0	0	0	0	0	0	0	0
02/03/2005 05:00:00	0	0	0	0	0	0	0	0	0	0	0	0	0
02/03/2005 06:00:00	0	0	0	0	0	0	0	0	0	0	0	0	0
02/03/2005 07:00:00	0	0	0	0	0	0	0	0	0	0	0	0	0
02/03/2005 08:00:00	0	0	0	0	0	0	0	0	0	0	0	0	0
02/03/2005 09:00:00	0	0	0	0	0	0	0	0	0	0	0	0	0
02/03/2005 10:00:00	0	0	0	0	0	0	0	0	0	0	0	0	0
02/03/2005 11:00:00	0	0	0	0	0	0	0	0	0	0	0	0	0
02/03/2005 12:00:00	0	0	0	0	0	0	0	0	0	0	0	0	0
02/03/2005 13:00:00	0	0	0	0	0	0	0	0	0	0	0	0	0
02/03/2005 14:00:00	0	0	0	0	0	0	0	0	0	0	0	0	0
02/03/2005 15:00:00	0	0	0	0	0	0	0	0	0	0	0	0	0
02/03/2005 16:00:00	0	0	0	0	0	0	0	0	0	0	0	0	0
02/03/2005 17:00:00	0	0	0	0	0	0	0	0	0	0	0	0	0
02/03/2005 18:00:00	0	0	0	0	0	0	0	0	0	0	0	0	0
02/03/2005 19:00:00	0	0	0	0	0	0	0	0	0	0	0	0	0
02/03/2005 20:00:00	0	0	0	0	0	0	0	0	0	0	0	0	0
02/03/2005 21:00:00	0	0	0	0	0	0	0	0	0	0	0	0	0
02/03/2005 22:00:00	0	0	0	0	0	0	0	0	0	0	0	0	0
02/03/2005 23:00:00	0	0	0	0	0	0	0	0	0	0	0	0	0
03/03/2005 00:00:00	0	0	0	0	0	0	0	0	0	0	0	0	0
03/03/2005 01:00:00	0	0	0	0	0	0	0	0	0	0	0	0	0
03/03/2005 02:00:00	0	0	0	0	0	0	0	0	0	0	0	0	0
03/03/2005 03:00:00	0	0	0	0	0	0	0	0	0	0	0	0	0
03/03/2005 04:00:00	0	0	0	0	0	0	0	0	0	0	0	0	0
03/03/2005 05:00:00	0	0	0	0	0	0	0	0	0	0	0	0	0
03/03/2005 06:00:00	0	0	0	0	0	0	0	0	0	0	0	0	0
03/03/2005 07:00:00	0	0	0	0	0	0	0	0	0	0	0	0	0
03/03/2005 08:00:00	0	0	0	0	0	0	0	0	0	0	0	0	0
03/03/2005 09:00:00	0	0	0	0	0	0	0	0	0	0	0	0	0
03/03/2005 10:00:00	0	0	0	0	0	0	0	0	0	0	0	0	0
03/03/2005 11:00:00	0	0	0	0	0	0	0	0	0	0	0	0	0
03/03/2005 12:00:00	0	0	0	0	0	0	0	0	0	0	0	0	0
03/03/2005 13:00:00	0	0	0	0	0	0	0	0	0	0	0	0	0
03/03/2005 14:00:00	0	0	0	0	0	0	0	0	0	0	0	0	0
03/03/2005 15:00:00	0	0	0	0	0	0	0	0	0	0	0	0	0
03/03/2005 16:00:00	0	0	0	0	0	0	0	0	0	0	0	0	0
03/03/2005 17:00:00	0	0	0	0	0	0	0	0	0	0	0	0	0
03/03/2005 18:00:00	0	0	0	0	0	0	0	0	0	0	0	0	0
03/03/2005 19:00:00	0	0	0	0	0	0	0	0	0	0	0	0	0
03/03/2005 20:00:00	0	0	0	0	0	0	0	0	0	0	0	0	0
03/03/2005 21:00:00	0	0	0	0	0	0	0	0	0	0	0	0	0
03/03/2005 22:00:00	0	0	0	0	0	0	0	0	0	0	0	0	0
03/03/2005 23:00:00	0	0	0	0	0	0	0	0	0	0	0	0	0
04/03/2005 00:00:00	0	0	0	0	0	0	0	0	0	0	0	0	0
04/03/2005 01:00:00	0	0	0	0	0	0	0	0	0	0	0	0	0
04/03/2005 02:00:00	0	0	0	0	0	0	0	0	0	0	0	0	0
04/03/2005 03:00:00	0	0	0	0	0	0	0	0	0	0	0	0	0
04/03/2005 04:00:00	0	0	0	0	0	0	0	0	0	0	0	0	0
04/03/2005 05:00:00	0	0	0	0	0	0	0	0	0	0	0	0	0
04/03/2005 06:00:00	0	0	0	0	0	0	0	0	0	0	0	0	0
04/03/2005 07:00:00	0	0	0	0	0	0	0	0	0	0	0	0	0
04/03/2005 08:00:00	0	0	0	0	0	0	0	0	0	0	0	0	0
04/03/2005 09:00:00	0	0	0	0	0	0	0	0	0	0	0	0	0
04/03/2005 10:00:00	0	0	0	0	0	0	0	0	0	0	0	0	0
04/03/2005 11:00:00	0	0	0	0	0	0	0	0	0	0	0	0	0
04/03/2005 12:00:00	0	0	0	0	0	0	0	0	0	0	0	0	0
04/03/2005 13:00:00	0	0	0	0	0	0	0	0	0	0	0	0	0
04/03/2005 14:00:00	0	0	0	0	0	0	0	0	0	0	0	0	0
04/03/2005 15:00:00	0	0	0	0	0	0	0	0	0	0	0	0	0
04/03/2005 16:00:00	0	0	0	0	0	0	0	0	0	0	0	0	0
04/03/2005 17:00:00	0	0	0	0	0	0	0	0	0	0	0	0	0
04/03/2005 18:00:00	0	0	0	0	0	0	0	0	0	0	0	0	0
04/03/2005 19:00:00	0	0	0	0	0	0	0	0	0	0	0	0	0
04/03/2005 20:00:00	0	0	0	0	0	0	0	0	0	0	0	0	0
04/03/2005 21:00:00	0	0	0	0	0	0	0	0	0	0	0	0	0
04/03/2005 22:00:00	0	0	0	0	0	0	0	0	0	0	0	0	0
04/03/2005 23:00:00	0	0	0	0	0	0	0	0	0	0	0	0	0
05/03/2005 00:00:00	0	0	0	0	0	0	0	0	0	0	0	0	0
05/03/2005 01:00:00	0	0	0	0	0	0	0	0	0	0	0	0	0
05/03/2005 02:00:00	0	0	0	0	0	0	0	0	0	0	0	0	0
05/03/2005 03:00:00	0	0	0	0	0	0	0	0	0	0	0	0	0
05/03/2005 04:00:00	0	0	0	0	0	0	0	0	0	0	0	0	0
05/03/2005 05:00:00	0	0	0	0	0	0	0	0	0	0	0	0	0
05/03/2005 06:00:00	0	0	0	0	0	0	0	0	0	0	0	0	0
05/03/2005 07:00:00	0	0	0	0	0	0	0	0	0	0	0	0	0
05/03/2005 08:00:00	0	0	0	0	0	0	0	0	0	0	0	0	0
05/03/2005 09:00:00	0	0	0	0	0	0	0	0	0	0	0	0	0
05/03/2005 10:00:00	0	0	0	0	0	0	0	0	0	0	0	0	0
05/03/2005 11:00:00	0	0	0	0	0	0	0	0	0	0	0	0	0
05/03/2005 12:00:00	0	0	0	0	0	0	0	0	0	0	0	0	0
05/03/2005 13:00:00	0	0	0	0	0	0	0	0	0	0	0	0	0
05/03/2005 14:00:00	0	0	0	0	0	0	0	0	0	0	0	0	0
05/03/2005 15:00:00	0	0	0	0	0	0	0	0	0	0	0	0	0
05/03/2005 16:00:00	0	0	0	0	0	0	0	0	0	0	0	0	0
05/03/2005 17:00:00	0	0	0	0	0	0	0	0	0	0	0	0	0
05/03/2005 18:00:00	0	0	0	0	0	0	0	0	0	0	0	0	0
05/03/2005 19:00:00	0	0	0	0	0	0	0	0	0	0	0	0	0
05/03/2005 20:00:00	0	0	0	0	0	0	0	0	0	0	0	0	0
05/03/2005 21:00:00	0	0	0	0	0	0	0	0	0	0	0	0	0
05/03/2005 22:00:00	0	0	0	0	0	0	0	0	0	0	0	0	0
05/03/2005 23:00:00	0	0	0	0	0	0	0	0	0	0	0	0	0
06/03/2005 00:00:00	0	0	0	0	0	0	0	0	0	0	0	0	0
06/03/2005 01:00:00	0	0	0	0	0	0	0	0	0	0	0	0	0
06/03/2005 02:00:00	0	0	0	0	0	0	0	0	0	0	0	0	0
06/03/2005 03:00:00	0	0	0	0	0	0	0	0	0	0	0	0	0
06/03/2005 04:00:00	0	0	0	0	0	0	0	0	0	0	0	0	0
06/03/2005 05:00:00	0	0	0	0	0	0	0	0	0	0	0	0	0
06/03/2005 06:00:00	0	0	0	0	0	0	0	0	0	0	0	0	0
06/03/2005 07:00:00	0	0	0	0	0	0	0	0	0	0	0	0	0
06/03/2005 08:00:00	0	0	0	0	0	0	0	0	0	0	0	0	0
06/03/2005 09:00:00	0	0	0	0	0	0	0	0	0	0	0	0	0
06/03/2005 10:00:00	0	0	0	0	0	0	0	0	0	0	0	0	0
06/03/2005 11:00:00	0	0	0	0	0	0	0	0	0	0	0	0	0
06/03/2005 12:00:00	0	0	0	0	0	0	0	0	0	0	0	0	0
06/03/2005 13:00:00	0	0	0	0	0	0	0	0	0	0	0	0	0
06/03/2005 14:00:00	0	0	0	0	0	0	0	0	0	0	0	0	0
06/03/2005 15:00:00	0	0	0	0	0	0	0	0	0	0	0	0	0
06/03/2005 16:00:00	0	0	0	0	0	0	0	0	0	0	0	0	0
06/03/2005 17:00:00	0	0	0	0	0	0	0	0	0	0	0	0	0
06/03/2005 18:00:00	0	0	0	0	0	0	0	0	0	0	0	0	0
06/03/2005 19:00:00	0	0	0	0	0	0	0	0	0	0	0	0	0
06/03/2005 20:00:00	0	0	0	0	0	0	0	0	0	0	0	0	0
06/03/2005 21:00:00	0	0	0	0	0	0	0	0	0	0	0	0	0
06/03/2005 22:00:00	0	0	0	0	0	0	0	0	0	0	0	0	0
06/03/2005 23:00:00	0	0	0	0	0	0	0	0	0	0	0	0	0
07/03/2005 00:00:00	0	0	0	0	0	0	0	0	0	0	0	0	0
07/03/2005 01:00:00	0	0	0	0	0	0	0	0	0	0	0	0	0
07/03/2005 02:00:00	0	0	0	0	0	0	0	0	0	0	0	0	0
07/03/2005 03:00:00	0	0	0	0	0	0	0	0	0	0	0	0	0
07/03/2005 04:00:00	0	0	0	0	0	0	0	0	0	0	0	0	0
07/03/2005 05:00:00	0	0	0	0	0	0	0	0	0	0	0	0	0
07/03/2005 06:00:00	0	0	0	0	0	0	0	0	0	0	0	0	0
07/03/2005 07:00:00	0	0	0	0	0	0	0	0	0	0	0	0	0
07/03/2005 08:00:00	0	0	0	0	0	0	0	0	0	0	0	0	0
07/03/2005 09:00:00	0	0	0	0	0	0	0	0	0	0	0	0	0
07/03/2005 10:00:00	0	0	0	0	0	0	0	0	0	0	0	0	0
07/03/2005 11:00:00	0	0	0	0	0	0	0	0	0	0	0	0	0
07/03/2005 12:00:00	0	0	0	0	0	0	0	0	0	0	0	0	0
07/03/2005 13:00:00	0	0	0	0	0	0	0	0	0	0	0	0	0
07/03/2005 14:00:00	0	0	0	0	0	0	0	0	0	0	0	0	0
07/03/2005 15:00:00	0	0	0	0	0	0	0	0	0	0	0	0	0
07/03/2005 16:00:00	0	0	0	0	0	0	0	0	0	0	0	0	0
07/03/2005 17:00:00	0	0	0	0	0	0	0	0	0	0	0	0	0
07/03/2005 18:00:00	0	0	0	0	0	0	0	0	0	0	0	0	0
07/03/2005 19:00:00	0	0	0	0	0	0	0	0	0	0	0	0	0
07/03/2005 20:00:00	0	0	0	0	0	0	0	0	0	0	0	0	0
07/03/2005 21:00:00	0	0	0	0	0	0	0	0	0	0	0	0	0
07/03/2005 22:00:00	0	0	0	0	0	0	0	0	0	0	0	0	0
07/03/2005 23:00:00	0	0	0	0	0	0	0	0	0	0	0	0	0
08/03/2005 00:00:00	0	0	0	0	0	0	0	0	0	0	0	0	0
08/03/2005 01:00:00	0	0	0	0	0	0	0	0	0	0	0	0	0
08/03/2005 02:00:00	0	0	0	0	0	0	0	0	0	0	0	0	0
08/03/2005 03:00:00	0	0	0	0	0	0	0	0	0	0	0	0	0
08/03/2005 04:00:00	0	0	0	0	0	0	0	0	0	0	0	0	0
08/03/2005 05:00:00	0	0	0	0	0	0	0	0	0	0	0	0	0
08/03/2005 06:00:00	0	0	0	0	0	0	0	0	0	0	0	0	0
08/03/2005 07:00:00	0	0	0	0	0	0	0	0	0	0	0	0	0
08/03/2005 08:00:00	0	0	0	0	0	0	0	0	0	0	0	0	0
08/03/2005 09:00:00	0	0	0	0	0	0	0	0	0	0	0	0	0
08/03/2005 10:00:00	0	0	0	0	0	0	0	0	0	0	0	0	0
08/03/2005 11:00:00	0	0	0	0	0	0	0	0	0	0	0	0	0
08/03/2005 12:00:00	0	0	0	0	0	0	0	0	0	0	0	0	0
08/03/2005 13:00:00	0	0	0	0	0	0	0	0	0	0	0	0	0
08/03/2005 14:00:00	0	0	0	0	0	0	0	0	0	0	0	0	0
08/03/2005 15:00:00	0	0	0	0	0	0	0	0	0	0	0	0	0
08/03/2005 16:00:00	0	0	0	0	0	0	0	0	0	0	0	0	0
08/03/2005 17:00:00	0	0	0	0	0	0	0	0	0	0	0	0	0
08/03/2005 18:00:00	0	0	0	0	0	0	0	0	0	0	0	0	0
08/03/2005 19:00:00	0	0	0	0	0	0	0	0	0	0	0	0	0
08/03/2005 20:00:00	0	0	0	0	0	0	0	0	0	0	0	0	0
08/03/2005 21:00:00	0	0	0	0	0	0	0	0	0	0	0	0	0
08/03/2005 22:00:00	0	0	0	0	0	0	0	0	0	0	0	0	0
08/03/2005 23:00:00	0	0	0	0	0	0	0	0	0	0	0	0	0
09/03/2005 00:00:00	0	0	0	0	0	0	0	0	0	0	0	0	0
09/03/2005 01:00:00	0	0	0	0	0	0	0	0	0	0	0	0	0
09/03/2005 02:00:00	0	0	0	0	0	0	0	0	0	0	0	0	0
09/03/2005 03:00:00	0	0	0	0	0	0	0	0	0	0	0	0	0
09/03/2005 04:00:00	0	0	0	0	0	0	0	0	0	0	0	0	0
09/03/2005 05:00:00	0	0	0	0	0	0	0	0	0	0	0	0	0
09/03/2005 06:00:00	0	0	0	0	0	0	0	0	0	0	0	0	0
09/03/2005 07:00:00	0	0	0	0	0	0	0	0	0	0	0	0	0
09/03/2005 08:00:00	0	0	0	0	0	0	0	0	0	0	0	0	0
09/03/2005 09:00:00	0	0	0	0	0	0	0	0	0	0	0	0	0
09/03/2005 10:00:00	0	0	0	0	0	0	0	0	0	0	0	0	0
09/03/2005 11:00:00	0	0	0	0	0	0	0	0	0	0	0	0	0
09/03/2005 12:00:00	0	0	0	0	0	0	0	0	0	0	0	0	0
09/03/2005 13:00:00	0	0	0	0	0	0	0	0	0	0	0	0	0
09/03/2005 14:00:00	0	0	0	0	0	0	0	0	0	0	0	0	0
09/03/2005 15:00:00	0	0	0	0	0	0	0	0	0	0	0	0	0
09/03/2005 16:00:00	0	0	0	0	0	0	0	0	0	0	0	0	0
09/03/2005 17:00:00	0	0	0	0	0	0	0	0	0	0	0	0	0
09/03/2005 18:00:00	0	0	0	0	0	0	0	0	0	0	0	0	0
09/03/2005 19:00:00	0	0	0	0	0	0	0	0	0	0	0	0	0
09/03/2005 20:00:00	0	0	0	0	0	0	0	0	0	0	0	0	0
09/03/2005 21:00:00	0	0	0	0	0	0	0	0	0	0	0	0	0
09/03/2005 22:00:00	0	0	0	0	0	0	0	0	0	0	0	0	0
09/03/2005 23:00:00	0	0	0	0	0	0	0	0	0	0	0	0	0
10/03/2005 00:00:00	0.145833333	0.025	0.129166667	0.129166667	0	0	0.083333333	0.079166667	0	0	0.004166667	0	0
10/03/2005 01:00:00	0.145833333	0.025	0.129166667	0.129166667	0	0	0.083333333	0.079166667	0	0	0.004166667	0	0
10/03/2005 02:00:00	0.145833333	0.025	0.129166667	0.129166667	0	0	0.083333333	0.079166667	0	0	0.004166667	0	0
10/03/2005 03:00:00	0.145833333	0.025	0.129166667	0.129166667	0	0	0.083333333	0.079166667	0	0	0.004166667	0	0
10/03/2005 04:00:00	0.145833333	0.025	0.129166667	0.129166667	0	0	0.083333333	0.079166667	0	0	0.004166667	0	0
10/03/2005 05:00:00	0.145833333	0.025	0.129166667	0.129166667	0	0	0.083333333	0.079166667	0	0	0.004166667	0	0
10/03/2005 06:00:00	0.145833333	0.025	0.129166667	0.129166667	0	0	0.083333333	0.079166667	0	0	0.004166667	0	0
10/03/2005 07:00:00	0.145833333	0.025	0.129166667	0.129166667	0	0	0.083333333	0.079166667	0	0	0.004166667	0	0
10/03/2005 08:00:00	0.145833333	0.025	0.129166667	0.129166667	0	0	0.083333333	0.079166667	0	0	0.004166667	0	0
10/03/2005 09:00:00	0.145833333	0.025	0.129166667	0.129166667	0	0	0.083333333	0.079166667	0	0	0.004166667	0	0
10/03/2005 10:00:00	0.145833333	0.025	0.129166667	0.129166667	0	0	0.083333333	0.079166667	0	0	0.004166667	0	0
10/03/2005 11:00:00	0.145833333	0.025	0.129166667	0.129166667	0	0	0.083333333	0.079166667	0	0	0.004166667	0	0
10/03/2005 12:00:00	0.145833333	0.025	0.129166667	0.129166667	0	0	0.083333333	0.079166667	0	0	0.004166667	0	0
10/03/2005 13:00:00	0.145833333	0.025	0.129166667	0.129166667	0	0	0.083333333	0.079166667	0	0	0.004166667	0	0
10/03/2005 14:00:00	0.145833333	0.025	0.129166667	0.129166667	0	0	0.083333333	0.079166667	0	0	0.004166667	0	0
10/03/2005 15:00:00	0.145833333	0.025	0.129166667	0.129166667	0	0	0.083333333	0.079166667	0	0	0.004166667	0	0
10/03/2005 16:00:00	0.145833333	0.025	0.129166667	0.129166667	0	0	0.083333333	0.079166667	0	0	0.004166667	0	0
10/03/2005 17:00:00	0.145833333	0.025	0.129166667	0.129166667	0	0	0.083333333	0.079166667	0	0	0.004166667	0	0
10/03/2005 18:00:00	0.145833333	0.025	0.129166667	0.129166667	0	0	0.083333333	0.079166667	0	0	0.004166667	0	0
10/03/2005 19:00:00	0.145833333	0.025	0.129166667	0.129166667	0	0	0.083333333	0.079166667	0	0	0.004166667	0	0
10/03/2005 20:00:00	0.145833333	0.025	0.129166667	0.129166667	0	0	0.083333333	0.079166667	0	0	0.004166667	0	0
10/03/2005 21:00:00	0.145833333	0.025	0.129166667	0.129166667	0	0	0.083333333	0.079166667	0	0	0.004166667	0	0
10/03/2005 22:00:00	0.145833333	0.025	0.129166667	0.129166667	0	0	0.083333333	0.079166667	0	0	0.004166667	0	0
10/03/2005 23:00:00	0.145833333	0.025	0.129166667	0.129166667	0	0	0.083333333	0.079166667	0	0	0.004166667	0	0
11/03/2005 00:00:00	0.5625	0.3875	0.504166667	0.529166667	0.3875	0.395833333	0.5375	0.525	0.504166667	0.483333333	0.445833333	0.545833333	0.491666667
11/03/2005 01:00:00	0.5625	0.3875	0.504166667	0.529166667	0.3875	0.395833333	0.5375	0.525	0.504166667	0.483333333	0.445833333	0.545833333	0.491666667
11/03/2005 02:00:00	0.5625	0.3875	0.504166667	0.529166667	0.3875	0.395833333	0.5375	0.525	0.504166667	0.483333333	0.445833333	0.545833333	0.491666667
11/03/2005 03:00:00	0.5625	0.3875	0.504166667	0.529166667	0.3875	0.395833333	0.5375	0.525	0.504166667	0.483333333	0.445833333	0.545833333	0.491666667
11/03/2005 04:00:00	0.5625	0.3875	0.504166667	0.529166667	0.3875	0.395833333	0.5375	0.525	0.504166667	0.483333333	0.445833333	0.545833333	0.491666667
11/03/2005 05:00:00	0.5625	0.3875	0.504166667	0.529166667	0.3875	0.395833333	0.5375	0.525	0.504166667	0.483333333	0.445833333	0.545833333	0.491666667
11/03/2005 06:00:00	0.5625	0.3875	0.504166667	0.529166667	0.3875	0.395833333	0.5375	0.525	0.504166667	0.483333333	0.445833333	0.545833333	0.491666667
11/03/2005 07:00:00	0.5625	0.3875	0.504166667	0.529166667	0.3875	0.395833333	0.5375	0.525	0.504166667	0.483333333	0.445833333	0.545833333	0.491666667
11/03/2005 08:00:00	0.5625	0.3875	0.504166667	0.529166667	0.3875	0.395833333	0.5375	0.525	0.504166667	0.483333333	0.445833333	0.545833333	0.491666667
11/03/2005 09:00:00	0.5625	0.3875	0.504166667	0.529166667	0.3875	0.395833333	0.5375	0.525	0.504166667	0.483333333	0.445833333	0.545833333	0.491666667
11/03/2005 10:00:00	0.5625	0.3875	0.504166667	0.529166667	0.3875	0.395833333	0.5375	0.525	0.504166667	0.483333333	0.445833333	0.545833333	0.491666667
11/03/2005 11:00:00	0.5625	0.3875	0.504166667	0.529166667	0.3875	0.395833333	0.5375	0.525	0.504166667	0.483333333	0.445833333	0.545833333	0.491666667
11/03/2005 12:00:00	0.5625	0.3875	0.504166667	0.529166667	0.3875	0.395833333	0.5375	0.525	0.504166667	0.483333333	0.445833333	0.545833333	0.491666667
11/03/2005 13:00:00	0.5625	0.3875	0.504166667	0.529166667	0.3875	0.395833333	0.5375	0.525	0.504166667	0.483333333	0.445833333	0.545833333	0.491666667
11/03/2005 14:00:00	0.5625	0.3875	0.504166667	0.529166667	0.3875	0.395833333	0.5375	0.525	0.504166667	0.483333333	0.445833333	0.545833333	0.491666667
11/03/2005 15:00:00	0.5625	0.3875	0.504166667	0.529166667	0.3875	0.395833333	0.5375	0.525	0.504166667	0.483333333	0.445833333	0.545833333	0.491666667
11/03/2005 16:00:00	0.5625	0.3875	0.504166667	0.529166667	0.3875	0.395833333	0.5375	0.525	0.504166667	0.483333333	0.445833333	0.545833333	0.491666667
11/03/2005 17:00:00	0.5625	0.3875	0.504166667	0.529166667	0.3875	0.395833333	0.5375	0.525	0.504166667	0.483333333	0.445833333	0.545833333	0.491666667
11/03/2005 18:00:00	0.5625	0.3875	0.504166667	0.529166667	0.3875	0.395833333	0.5375	0.525	0.504166667	0.483333333	0.445833333	0.545833333	0.491666667
11/03/2005 19:00:00	0.5625	0.3875	0.504166667	0.529166667	0.3875	0.395833333	0.5375	0.525	0.504166667	0.483333333	0.445833333	0.545833333	0.491666667
11/03/2005 20:00:00	0.5625	0.3875	0.504166667	0.529166667	0.3875	0.395833333	0.5375	0.525	0.504166667	0.483333333	0.445833333	0.545833333	0.491666667
11/03/2005 21:00:00	0.5625	0.3875	0.504166667	0.529166667	0.3875	0.395833333	0.5375	0.525	0.504166667	0.483333333	0.445833333	0.545833333	0.491666667
11/03/2005 22:00:00	0.5625	0.3875	0.504166667	0.529166667	0.3875	0.395833333	0.5375	0.525	0.504166667	0.483333333	0.445833333	0.545833333	0.491666667
11/03/2005 23:00:00	0.5625	0.3875	0.504166667	0.529166667	0.3875	0.395833333	0.5375	0.525	0.504166667	0.483333333	0.445833333	0.545833333	0.491666667
12/03/2005 00:00:00	0	0	0	0	0	0	0	0	0	0	0	0	0
12/03/2005 01:00:00	0	0	0	0	0	0	0	0	0	0	0	0	0
12/03/2005 02:00:00	0	0	0	0	0	0	0	0	0	0	0	0	0
12/03/2005 03:00:00	0	0	0	0	0	0	0	0	0	0	0	0	0
12/03/2005 04:00:00	0	0	0	0	0	0	0	0	0	0	0	0	0
12/03/2005 05:00:00	0	0	0	0	0	0	0	0	0	0	0	0	0
12/03/2005 06:00:00	0	0	0	0	0	0	0	0	0	0	0	0	0
12/03/2005 07:00:00	0	0	0	0	0	0	0	0	0	0	0	0	0
12/03/2005 08:00:00	0	0	0	0	0	0	0	0	0	0	0	0	0
12/03/2005 09:00:00	0	0	0	0	0	0	0	0	0	0	0	0	0
12/03/2005 10:00:00	0	0	0	0	0	0	0	0	0	0	0	0	0
12/03/2005 11:00:00	0	0	0	0	0	0	0	0	0	0	0	0	0
12/03/2005 12:00:00	0	0	0	0	0	0	0	0	0	0	0	0	0
12/03/2005 13:00:00	0	0	0	0	0	0	0	0	0	0	0	0	0
12/03/2005 14:00:00	0	0	0	0	0	0	0	0	0	0	0	0	0
12/03/2005 15:00:00	0	0	0	0	0	0	0	0	0	0	0	0	0
12/03/2005 16:00:00	0	0	0	0	0	0	0	0	0	0	0	0	0
12/03/2005 17:00:00	0	0	0	0	0	0	0	0	0	0	0	0	0
12/03/2005 18:00:00	0	0	0	0	0	0	0	0	0	0	0	0	0
12/03/2005 19:00:00	0	0	0	0	0	0	0	0	0	0	0	0	0
12/03/2005 20:00:00	0	0	0	0	0	0	0	0	0	0	0	0	0
12/03/2005 21:00:00	0	0	0	0	0	0	0	0	0	0	0	0	0
12/03/2005 22:00:00	0	0	0	0	0	0	0	0	0	0	0	0	0
12/03/2005 23:00:00	0	0	0	0	0	0	0	0	0	0	0	0	0
13/03/2005 00:00:00	0	0	0	0	0	0	0	0	0	0	0	0	0
13/03/2005 01:00:00	0	0	0	0	0	0	0	0	0	0	0	0	0
13/03/2005 02:00:00	0	0	0	0	0	0	0	0	0	0	0	0	0
13/03/2005 03:00:00	0	0	0	0	0	0	0	0	0	0	0	0	0
13/03/2005 04:00:00	0	0	0	0	0	0	0	0	0	0	0	0	0
13/03/2005 05:00:00	0	0	0	0	0	0	0	0	0	0	0	0	0
13/03/2005 06:00:00	0	0	0	0	0	0	0	0	0	0	0	0	0
13/03/2005 07:00:00	0	0	0	0	0	0	0	0	0	0	0	0	0
13/03/2005 08:00:00	0	0	0	0	0	0	0	0	0	0	0	0	0
13/03/2005 09:00:00	0	0	0	0	0	0	0	0	0	0	0	0	0
13/03/2005 10:00:00	0	0	0	0	0	0	0	0	0	0	0	0	0
13/03/2005 11:00:00	0	0	0	0	0	0	0	0	0	0	0	0	0
13/03/2005 12:00:00	0	0	0	0	0	0	0	0	0	0	0	0	0
13/03/2005 13:00:00	0	0	0	0	0	0	0	0	0	0	0	0	0
13/03/2005 14:00:00	0	0	0	0	0	0	0	0	0	0	0	0	0
13/03/2005 15:00:00	0	0	0	0	0	0	0	0	0	0	0	0	0
13/03/2005 16:00:00	0	0	0	0	0	0	0	0	0	0	0	0	0
13/03/2005 17:00:00	0	0	0	0	0	0	0	0	0	0	0	0	0
13/03/2005 18:00:00	0	0	0	0	0	0	0	0	0	0	0	0	0
13/03/2005 19:00:00	0	0	0	0	0	0	0	0	0	0	0	0	0
13/03/2005 20:00:00	0	0	0	0	0	0	0	0	0	0	0	0	0
13/03/2005 21:00:00	0	0	0	0	0	0	0	0	0	0	0	0	0
13/03/2005 22:00:00	0	0	0	0	0	0	0	0	0	0	0	0	0
13/03/2005 23:00:00	0	0	0	0	0	0	0	0	0	0	0	0	0
14/03/2005 00:00:00	0.104166667	0.066666667	0.216666667	0.1375	0.1	0.045833333	0.054166667	0.025	0.020833333	0.029166667	0	0.020833333	0
14/03/2005 01:00:00	0.104166667	0.066666667	0.216666667	0.1375	0.1	0.045833333	0.054166667	0.025	0.020833333	0.029166667	0	0.020833333	0
14/03/2005 02:00:00	0.104166667	0.066666667	0.216666667	0.1375	0.1	0.045833333	0.054166667	0.025	0.020833333	0.029166667	0	0.020833333	0
14/03/2005 03:00:00	0.104166667	0.066666667	0.216666667	0.1375	0.1	0.045833333	0.054166667	0.025	0.020833333	0.029166667	0	0.020833333	0
14/03/2005 04:00:00	0.104166667	0.066666667	0.216666667	0.1375	0.1	0.045833333	0.054166667	0.025	0.020833333	0.029166667	0	0.020833333	0
14/03/2005 05:00:00	0.104166667	0.066666667	0.216666667	0.1375	0.1	0.045833333	0.054166667	0.025	0.020833333	0.029166667	0	0.020833333	0
14/03/2005 06:00:00	0.104166667	0.066666667	0.216666667	0.1375	0.1	0.045833333	0.054166667	0.025	0.020833333	0.029166667	0	0.020833333	0
14/03/2005 07:00:00	0.104166667	0.066666667	0.216666667	0.1375	0.1	0.045833333	0.054166667	0.025	0.020833333	0.029166667	0	0.020833333	0
14/03/2005 08:00:00	0.104166667	0.066666667	0.216666667	0.1375	0.1	0.045833333	0.054166667	0.025	0.020833333	0.029166667	0	0.020833333	0
14/03/2005 09:00:00	0.104166667	0.066666667	0.216666667	0.1375	0.1	0.045833333	0.054166667	0.025	0.020833333	0.029166667	0	0.020833333	0
14/03/2005 10:00:00	0.104166667	0.066666667	0.216666667	0.1375	0.1	0.045833333	0.054166667	0.025	0.020833333	0.029166667	0	0.020833333	0
14/03/2005 11:00:00	0.104166667	0.066666667	0.216666667	0.1375	0.1	0.045833333	0.054166667	0.025	0.020833333	0.029166667	0	0.020833333	0
14/03/2005 12:00:00	0.104166667	0.066666667	0.216666667	0.1375	0.1	0.045833333	0.054166667	0.025	0.020833333	0.029166667	0	0.020833333	0
14/03/2005 13:00:00	0.104166667	0.066666667	0.216666667	0.1375	0.1	0.045833333	0.054166667	0.025	0.020833333	0.029166667	0	0.020833333	0
14/03/2005 14:00:00	0.104166667	0.066666667	0.216666667	0.1375	0.1	0.045833333	0.054166667	0.025	0.020833333	0.029166667	0	0.020833333	0
14/03/2005 15:00:00	0.104166667	0.066666667	0.216666667	0.1375	0.1	0.045833333	0.054166667	0.025	0.020833333	0.029166667	0	0.020833333	0
14/03/2005 16:00:00	0.104166667	0.066666667	0.216666667	0.1375	0.1	0.045833333	0.054166667	0.025	0.020833333	0.029166667	0	0.020833333	0
14/03/2005 17:00:00	0.104166667	0.066666667	0.216666667	0.1375	0.1	0.045833333	0.054166667	0.025	0.020833333	0.029166667	0	0.020833333	0
14/03/2005 18:00:00	0.104166667	0.066666667	0.216666667	0.1375	0.1	0.045833333	0.054166667	0.025	0.020833333	0.029166667	0	0.020833333	0
14/03/2005 19:00:00	0.104166667	0.066666667	0.216666667	0.1375	0.1	0.045833333	0.054166667	0.025	0.020833333	0.029166667	0	0.020833333	0
14/03/2005 20:00:00	0.104166667	0.066666667	0.216666667	0.1375	0.1	0.045833333	0.054166667	0.025	0.020833333	0.029166667	0	0.020833333	0
14/03/2005 21:00:00	0.104166667	0.066666667	0.216666667	0.1375	0.1	0.045833333	0.054166667	0.025	0.020833333	0.029166667	0	0.020833333	0
14/03/2005 22:00:00	0.104166667	0.066666667	0.216666667	0.1375	0.1	0.045833333	0.054166667	0.025	0.020833333	0.029166667	0	0.020833333	0
14/03/2005 23:00:00	0.104166667	0.066666667	0.216666667	0.1375	0.1	0.045833333	0.054166667	0.025	0.020833333	0.029166667	0	0.020833333	0
15/03/2005 00:00:00	0	0	0	0	0	0	0	0	0	0	0	0	0
15/03/2005 01:00:00	0	0	0	0	0	0	0	0	0	0	0	0	0
15/03/2005 02:00:00	0	0	0	0	0	0	0	0	0	0	0	0	0
15/03/2005 03:00:00	0	0	0	0	0	0	0	0	0	0	0	0	0
15/03/2005 04:00:00	0	0	0	0	0	0	0	0	0	0	0	0	0
15/03/2005 05:00:00	0	0	0	0	0	0	0	0	0	0	0	0	0
15/03/2005 06:00:00	0	0	0	0	0	0	0	0	0	0	0	0	0
15/03/2005 07:00:00	0	0	0	0	0	0	0	0	0	0	0	0	0
15/03/2005 08:00:00	0	0	0	0	0	0	0	0	0	0	0	0	0
15/03/2005 09:00:00	0	0	0	0	0	0	0	0	0	0	0	0	0
15/03/2005 10:00:00	0	0	0	0	0	0	0	0	0	0	0	0	0
15/03/2005 11:00:00	0	0	0	0	0	0	0	0	0	0	0	0	0
15/03/2005 12:00:00	0	0	0	0	0	0	0	0	0	0	0	0	0
15/03/2005 13:00:00	0	0	0	0	0	0	0	0	0	0	0	0	0
15/03/2005 14:00:00	0	0	0	0	0	0	0	0	0	0	0	0	0
15/03/2005 15:00:00	0	0	0	0	0	0	0	0	0	0	0	0	0
15/03/2005 16:00:00	0	0	0	0	0	0	0	0	0	0	0	0	0
15/03/2005 17:00:00	0	0	0	0	0	0	0	0	0	0	0	0	0
15/03/2005 18:00:00	0	0	0	0	0	0	0	0	0	0	0	0	0
15/03/2005 19:00:00	0	0	0	0	0	0	0	0	0	0	0	0	0
15/03/2005 20:00:00	0	0	0	0	0	0	0	0	0	0	0	0	0
15/03/2005 21:00:00	0	0	0	0	0	0	0	0	0	0	0	0	0
15/03/2005 22:00:00	0	0	0	0	0	0	0	0	0	0	0	0	0
15/03/2005 23:00:00	0	0	0	0	0	0	0	0	0	0	0	0	0
16/03/2005 00:00:00	0	0	0	0	0.0625	0.045833333	0	0.029166667	0.025	0.041666667	0.045833333	0.016666667	0.2
16/03/2005 01:00:00	0	0	0	0	0.0625	0.045833333	0	0.029166667	0.025	0.041666667	0.045833333	0.016666667	0.2
16/03/2005 02:00:00	0	0	0	0	0.0625	0.045833333	0	0.029166667	0.025	0.041666667	0.045833333	0.016666667	0.2
16/03/2005 03:00:00	0	0	0	0	0.0625	0.045833333	0	0.029166667	0.025	0.041666667	0.045833333	0.016666667	0.2
16/03/2005 04:00:00	0	0	0	0	0.0625	0.045833333	0	0.029166667	0.025	0.041666667	0.045833333	0.016666667	0.2
16/03/2005 05:00:00	0	0	0	0	0.0625	0.045833333	0	0.029166667	0.025	0.041666667	0.045833333	0.016666667	0.2
16/03/2005 06:00:00	0	0	0	0	0.0625	0.045833333	0	0.029166667	0.025	0.041666667	0.045833333	0.016666667	0.2
16/03/2005 07:00:00	0	0	0	0	0.0625	0.045833333	0	0.029166667	0.025	0.041666667	0.045833333	0.016666667	0.2
16/03/2005 08:00:00	0	0	0	0	0.0625	0.045833333	0	0.029166667	0.025	0.041666667	0.045833333	0.016666667	0.2
16/03/2005 09:00:00	0	0	0	0	0.0625	0.045833333	0	0.029166667	0.025	0.041666667	0.045833333	0.016666667	0.2
16/03/2005 10:00:00	0	0	0	0	0.0625	0.045833333	0	0.029166667	0.025	0.041666667	0.045833333	0.016666667	0.2
16/03/2005 11:00:00	0	0	0	0	0.0625	0.045833333	0	0.029166667	0.025	0.041666667	0.045833333	0.016666667	0.2
16/03/2005 12:00:00	0	0	0	0	0.0625	0.045833333	0	0.029166667	0.025	0.041666667	0.045833333	0.016666667	0.2
16/03/2005 13:00:00	0	0	0	0	0.0625	0.045833333	0	0.029166667	0.025	0.041666667	0.045833333	0.016666667	0.2
16/03/2005 14:00:00	0	0	0	0	0.0625	0.045833333	0	0.029166667	0.025	0.041666667	0.045833333	0.016666667	0.2
16/03/2005 15:00:00	0	0	0	0	0.0625	0.045833333	0	0.029166667	0.025	0.041666667	0.045833333	0.016666667	0.2
16/03/2005 16:00:00	0	0	0	0	0.0625	0.045833333	0	0.029166667	0.025	0.041666667	0.045833333	0.016666667	0.2
16/03/2005 17:00:00	0	0	0	0	0.0625	0.045833333	0	0.029166667	0.025	0.041666667	0.045833333	0.016666667	0.2
16/03/2005 18:00:00	0	0	0	0	0.0625	0.045833333	0	0.029166667	0.025	0.041666667	0.045833333	0.016666667	0.2
16/03/2005 19:00:00	0	0	0	0	0.0625	0.045833333	0	0.029166667	0.025	0.041666667	0.045833333	0.016666667	0.2
16/03/2005 20:00:00	0	0	0	0	0.0625	0.045833333	0	0.029166667	0.025	0.041666667	0.045833333	0.016666667	0.2
16/03/2005 21:00:00	0	0	0	0	0.0625	0.045833333	0	0.029166667	0.025	0.041666667	0.045833333	0.016666667	0.2
16/03/2005 22:00:00	0	0	0	0	0.0625	0.045833333	0	0.029166667	0.025	0.041666667	0.045833333	0.016666667	0.2
16/03/2005 23:00:00	0	0	0	0	0.0625	0.045833333	0	0.029166667	0.025	0.041666667	0.045833333	0.016666667	0.2
17/03/2005 00:00:00	0	0	0	0	0	0	0	0	0	0	0	0	0
17/03/2005 01:00:00	0	0	0	0	0	0	0	0	0	0	0	0	0
17/03/2005 02:00:00	0	0	0	0	0	0	0	0	0	0	0	0	0
17/03/2005 03:00:00	0	0	0	0	0	0	0	0	0	0	0	0	0
17/03/2005 04:00:00	0	0	0	0	0	0	0	0	0	0	0	0	0
17/03/2005 05:00:00	0	0	0	0	0	0	0	0	0	0	0	0	0
17/03/2005 06:00:00	0	0	0	0	0	0	0	0	0	0	0	0	0
17/03/2005 07:00:00	0	0	0	0	0	0	0	0	0	0	0	0	0
17/03/2005 08:00:00	0	0	0	0	0	0	0	0	0	0	0	0	0
17/03/2005 09:00:00	0	0	0	0	0	0	0	0	0	0	0	0	0
17/03/2005 10:00:00	0	0	0	0	0	0	0	0	0	0	0	0	0
17/03/2005 11:00:00	0	0	0	0	0	0	0	0	0	0	0	0	0
17/03/2005 12:00:00	0	0	0	0	0	0	0	0	0	0	0	0	0
17/03/2005 13:00:00	0	0	0	0	0	0	0	0	0	0	0	0	0
17/03/2005 14:00:00	0	0	0	0	0	0	0	0	0	0	0	0	0
17/03/2005 15:00:00	0	0	0	0	0	0	0	0	0	0	0	0	0
17/03/2005 16:00:00	0	0	0	0	0	0	0	0	0	0	0	0	0
17/03/2005 17:00:00	0	0	0	0	0	0	0	0	0	0	0	0	0
17/03/2005 18:00:00	0	0	0	0	0	0	0	0	0	0	0	0	0
17/03/2005 19:00:00	0	0	0	0	0	0	0	0	0	0	0	0	0
17/03/2005 20:00:00	0	0	0	0	0	0	0	0	0	0	0	0	0
17/03/2005 21:00:00	0	0	0	0	0	0	0	0	0	0	0	0	0
17/03/2005 22:00:00	0	0	0	0	0	0	0	0	0	0	0	0	0
17/03/2005 23:00:00	0	0	0	0	0	0	0	0	0	0	0	0	0
18/03/2005 00:00:00	0	0	0	0	0	0	0	0	0	0	0	0	0
18/03/2005 01:00:00	0	0	0	0	0	0	0	0	0	0	0	0	0
18/03/2005 02:00:00	0	0	0	0	0	0	0	0	0	0	0	0	0
18/03/2005 03:00:00	0	0	0	0	0	0	0	0	0	0	0	0	0
18/03/2005 04:00:00	0	0	0	0	0	0	0	0	0	0	0	0	0
18/03/2005 05:00:00	0	0	0	0	0	0	0	0	0	0	0	0	0
18/03/2005 06:00:00	0	0	0	0	0	0	0	0	0	0	0	0	0
18/03/2005 07:00:00	0	0	0	0	0	0	0	0	0	0	0	0	0
18/03/2005 08:00:00	0	0	0	0	0	0	0	0	0	0	0	0	0
18/03/2005 09:00:00	0	0	0	0	0	0	0	0	0	0	0	0	0
18/03/2005 10:00:00	0	0	0	0	0	0	0	0	0	0	0	0	0
18/03/2005 11:00:00	0	0	0	0	0	0	0	0	0	0	0	0	0
18/03/2005 12:00:00	0	0	0	0	0	0	0	0	0	0	0	0	0
18/03/2005 13:00:00	0	0	0	0	0	0	0	0	0	0	0	0	0
18/03/2005 14:00:00	0	0	0	0	0	0	0	0	0	0	0	0	0
18/03/2005 15:00:00	0	0	0	0	0	0	0	0	0	0	0	0	0
18/03/2005 16:00:00	0	0	0	0	0	0	0	0	0	0	0	0	0
18/03/2005 17:00:00	0	0	0	0	0	0	0	0	0	0	0	0	0
18/03/2005 18:00:00	0	0	0	0	0	0	0	0	0	0	0	0	0
18/03/2005 19:00:00	0	0	0	0	0	0	0	0	0	0	0	0	0
18/03/2005 20:00:00	0	0	0	0	0	0	0	0	0	0	0	0	0
18/03/2005 21:00:00	0	0	0	0	0	0	0	0	0	0	0	0	0
18/03/2005 22:00:00	0	0	0	0	0	0	0	0	0	0	0	0	0
18/03/2005 23:00:00	0	0	0	0	0	0	0	0	0	0	0	0	0
19/03/2005 00:00:00	0	0	0	0	0	0	0	0	0	0	0	0	0
19/03/2005 01:00:00	0	0	0	0	0	0	0	0	0	0	0	0	0
19/03/2005 02:00:00	0	0	0	0	0	0	0	0	0	0	0	0	0
19/03/2005 03:00:00	0	0	0	0	0	0	0	0	0	0	0	0	0
19/03/2005 04:00:00	0	0	0	0	0	0	0	0	0	0	0	0	0
19/03/2005 05:00:00	0	0	0	0	0	0	0	0	0	0	0	0	0
19/03/2005 06:00:00	0	0	0	0	0	0	0	0	0	0	0	0	0
19/03/2005 07:00:00	0	0	0	0	0	0	0	0	0	0	0	0	0
19/03/2005 08:00:00	0	0	0	0	0	0	0	0	0	0	0	0	0
19/03/2005 09:00:00	0	0	0	0	0	0	0	0	0	0	0	0	0
19/03/2005 10:00:00	0	0	0	0	0	0	0	0	0	0	0	0	0
19/03/2005 11:00:00	0	0	0	0	0	0	0	0	0	0	0	0	0
19/03/2005 12:00:00	0	0	0	0	0	0	0	0	0	0	0	0	0
19/03/2005 13:00:00	0	0	0	0	0	0	0	0	0	0	0	0	0
19/03/2005 14:00:00	0	0	0	0	0	0	0	0	0	0	0	0	0
19/03/2005 15:00:00	0	0	0	0	0	0	0	0	0	0	0	0	0
19/03/2005 16:00:00	0	0	0	0	0	0	0	0	0	0	0	0	0
19/03/2005 17:00:00	0	0	0	0	0	0	0	0	0	0	0	0	0
19/03/2005 18:00:00	0	0	0	0	0	0	0	0	0	0	0	0	0
19/03/2005 19:00:00	0	0	0	0	0	0	0	0	0	0	0	0	0
19/03/2005 20:00:00	0	0	0	0	0	0	0	0	0	0	0	0	0
19/03/2005 21:00:00	0	0	0	0	0	0	0	0	0	0	0	0	0
19/03/2005 22:00:00	0	0	0	0	0	0	0	0	0	0	0	0	0
19/03/2005 23:00:00	0	0	0	0	0	0	0	0	0	0	0	0	0
20/03/2005 00:00:00	0.520833333	0.304166667	1.045833333	0.458333333	0.8625	0.445833333	0.6	0.441666667	0.329166667	0.308333333	0.1125	0.258333333	0.241666667
20/03/2005 01:00:00	0.520833333	0.304166667	1.045833333	0.458333333	0.8625	0.445833333	0.6	0.441666667	0.329166667	0.308333333	0.1125	0.258333333	0.241666667
20/03/2005 02:00:00	0.520833333	0.304166667	1.045833333	0.458333333	0.8625	0.445833333	0.6	0.441666667	0.329166667	0.308333333	0.1125	0.258333333	0.241666667
20/03/2005 03:00:00	0.520833333	0.304166667	1.045833333	0.458333333	0.8625	0.445833333	0.6	0.441666667	0.329166667	0.308333333	0.1125	0.258333333	0.241666667
20/03/2005 04:00:00	0.520833333	0.304166667	1.045833333	0.458333333	0.8625	0.445833333	0.6	0.441666667	0.329166667	0.308333333	0.1125	0.258333333	0.241666667
20/03/2005 05:00:00	0.520833333	0.304166667	1.045833333	0.458333333	0.8625	0.445833333	0.6	0.441666667	0.329166667	0.308333333	0.1125	0.258333333	0.241666667
20/03/2005 06:00:00	0.520833333	0.304166667	1.045833333	0.458333333	0.8625	0.445833333	0.6	0.441666667	0.329166667	0.308333333	0.1125	0.258333333	0.241666667
20/03/2005 07:00:00	0.520833333	0.304166667	1.045833333	0.458333333	0.8625	0.445833333	0.6	0.441666667	0.329166667	0.308333333	0.1125	0.258333333	0.241666667
20/03/2005 08:00:00	0.520833333	0.304166667	1.045833333	0.458333333	0.8625	0.445833333	0.6	0.441666667	0.329166667	0.308333333	0.1125	0.258333333	0.241666667
20/03/2005 09:00:00	0.520833333	0.304166667	1.045833333	0.458333333	0.8625	0.445833333	0.6	0.441666667	0.329166667	0.308333333	0.1125	0.258333333	0.241666667
20/03/2005 10:00:00	0.520833333	0.304166667	1.045833333	0.458333333	0.8625	0.445833333	0.6	0.441666667	0.329166667	0.308333333	0.1125	0.258333333	0.241666667
20/03/2005 11:00:00	0.520833333	0.304166667	1.045833333	0.458333333	0.8625	0.445833333	0.6	0.441666667	0.329166667	0.308333333	0.1125	0.258333333	0.241666667
20/03/2005 12:00:00	0.520833333	0.304166667	1.045833333	0.458333333	0.8625	0.445833333	0.6	0.441666667	0.329166667	0.308333333	0.1125	0.258333333	0.241666667
20/03/2005 13:00:00	0.520833333	0.304166667	1.045833333	0.458333333	0.8625	0.445833333	0.6	0.441666667	0.329166667	0.308333333	0.1125	0.258333333	0.241666667
20/03/2005 14:00:00	0.520833333	0.304166667	1.045833333	0.458333333	0.8625	0.445833333	0.6	0.441666667	0.329166667	0.308333333	0.1125	0.258333333	0.241666667
20/03/2005 15:00:00	0.520833333	0.304166667	1.045833333	0.458333333	0.8625	0.445833333	0.6	0.441666667	0.329166667	0.308333333	0.1125	0.258333333	0.241666667
20/03/2005 16:00:00	0.520833333	0.304166667	1.045833333	0.458333333	0.8625	0.445833333	0.6	0.441666667	0.329166667	0.308333333	0.1125	0.258333333	0.241666667
20/03/2005 17:00:00	0.520833333	0.304166667	1.045833333	0.458333333	0.8625	0.445833333	0.6	0.441666667	0.329166667	0.308333333	0.1125	0.258333333	0.241666667
20/03/2005 18:00:00	0.520833333	0.304166667	1.045833333	0.458333333	0.8625	0.445833333	0.6	0.441666667	0.329166667	0.308333333	0.1125	0.258333333	0.241666667
20/03/2005 19:00:00	0.520833333	0.304166667	1.045833333	0.458333333	0.8625	0.445833333	0.6	0.441666667	0.329166667	0.308333333	0.1125	0.258333333	0.241666667
20/03/2005 20:00:00	0.520833333	0.304166667	1.045833333	0.458333333	0.8625	0.445833333	0.6	0.441666667	0.329166667	0.308333333	0.1125	0.258333333	0.241666667
20/03/2005 21:00:00	0.520833333	0.304166667	1.045833333	0.458333333	0.8625	0.445833333	0.6	0.441666667	0.329166667	0.308333333	0.1125	0.258333333	0.241666667
20/03/2005 22:00:00	0.520833333	0.304166667	1.045833333	0.458333333	0.8625	0.445833333	0.6	0.441666667	0.329166667	0.308333333	0.1125	0.258333333	0.241666667
20/03/2005 23:00:00	0.520833333	0.304166667	1.045833333	0.458333333	0.8625	0.445833333	0.6	0.441666667	0.329166667	0.308333333	0.1125	0.258333333	0.241666667
21/03/2005 00:00:00	0.645833333	0.4125	0.120833333	0.75	0.75	0.583333333	0.804166667	1.0375	0.875	0.854166667	1.141666667	0.883333333	0.916666667
21/03/2005 01:00:00	0.645833333	0.4125	0.120833333	0.75	0.75	0.583333333	0.804166667	1.0375	0.875	0.854166667	1.141666667	0.883333333	0.916666667
21/03/2005 02:00:00	0.645833333	0.4125	0.120833333	0.75	0.75	0.583333333	0.804166667	1.0375	0.875	0.854166667	1.141666667	0.883333333	0.916666667
21/03/2005 03:00:00	0.645833333	0.4125	0.120833333	0.75	0.75	0.583333333	0.804166667	1.0375	0.875	0.854166667	1.141666667	0.883333333	0.916666667
21/03/2005 04:00:00	0.645833333	0.4125	0.120833333	0.75	0.75	0.583333333	0.804166667	1.0375	0.875	0.854166667	1.141666667	0.883333333	0.916666667
21/03/2005 05:00:00	0.645833333	0.4125	0.120833333	0.75	0.75	0.583333333	0.804166667	1.0375	0.875	0.854166667	1.141666667	0.883333333	0.916666667
21/03/2005 06:00:00	0.645833333	0.4125	0.120833333	0.75	0.75	0.583333333	0.804166667	1.0375	0.875	0.854166667	1.141666667	0.883333333	0.916666667
21/03/2005 07:00:00	0.645833333	0.4125	0.120833333	0.75	0.75	0.583333333	0.804166667	1.0375	0.875	0.854166667	1.141666667	0.883333333	0.916666667
21/03/2005 08:00:00	0.645833333	0.4125	0.120833333	0.75	0.75	0.583333333	0.804166667	1.0375	0.875	0.854166667	1.141666667	0.883333333	0.916666667
21/03/2005 09:00:00	0.645833333	0.4125	0.120833333	0.75	0.75	0.583333333	0.804166667	1.0375	0.875	0.854166667	1.141666667	0.883333333	0.916666667
21/03/2005 10:00:00	0.645833333	0.4125	0.120833333	0.75	0.75	0.583333333	0.804166667	1.0375	0.875	0.854166667	1.141666667	0.883333333	0.916666667
21/03/2005 11:00:00	0.645833333	0.4125	0.120833333	0.75	0.75	0.583333333	0.804166667	1.0375	0.875	0.854166667	1.141666667	0.883333333	0.916666667
21/03/2005 12:00:00	0.645833333	0.4125	0.120833333	0.75	0.75	0.583333333	0.804166667	1.0375	0.875	0.854166667	1.141666667	0.883333333	0.916666667
21/03/2005 13:00:00	0.645833333	0.4125	0.120833333	0.75	0.75	0.583333333	0.804166667	1.0375	0.875	0.854166667	1.141666667	0.883333333	0.916666667
21/03/2005 14:00:00	0.645833333	0.4125	0.120833333	0.75	0.75	0.583333333	0.804166667	1.0375	0.875	0.854166667	1.141666667	0.883333333	0.916666667
21/03/2005 15:00:00	0.645833333	0.4125	0.120833333	0.75	0.75	0.583333333	0.804166667	1.0375	0.875	0.854166667	1.141666667	0.883333333	0.916666667
21/03/2005 16:00:00	0.645833333	0.4125	0.120833333	0.75	0.75	0.583333333	0.804166667	1.0375	0.875	0.854166667	1.141666667	0.883333333	0.916666667
21/03/2005 17:00:00	0.645833333	0.4125	0.120833333	0.75	0.75	0.583333333	0.804166667	1.0375	0.875	0.854166667	1.141666667	0.883333333	0.916666667
21/03/2005 18:00:00	0.645833333	0.4125	0.120833333	0.75	0.75	0.583333333	0.804166667	1.0375	0.875	0.854166667	1.141666667	0.883333333	0.916666667
21/03/2005 19:00:00	0.645833333	0.4125	0.120833333	0.75	0.75	0.583333333	0.804166667	1.0375	0.875	0.854166667	1.141666667	0.883333333	0.916666667
21/03/2005 20:00:00	0.645833333	0.4125	0.120833333	0.75	0.75	0.583333333	0.804166667	1.0375	0.875	0.854166667	1.141666667	0.883333333	0.916666667
21/03/2005 21:00:00	0.645833333	0.4125	0.120833333	0.75	0.75	0.583333333	0.804166667	1.0375	0.875	0.854166667	1.141666667	0.883333333	0.916666667
21/03/2005 22:00:00	0.645833333	0.4125	0.120833333	0.75	0.75	0.583333333	0.804166667	1.0375	0.875	0.854166667	1.141666667	0.883333333	0.916666667
21/03/2005 23:00:00	0.645833333	0.4125	0.120833333	0.75	0.75	0.583333333	0.804166667	1.0375	0.875	0.854166667	1.141666667	0.883333333	0.916666667
22/03/2005 00:00:00	0	0	0	0	0	0	0	0	0	0	0	0	0.129166667
22/03/2005 01:00:00	0	0	0	0	0	0	0	0	0	0	0	0	0.129166667
22/03/2005 02:00:00	0	0	0	0	0	0	0	0	0	0	0	0	0.129166667
22/03/2005 03:00:00	0	0	0	0	0	0	0	0	0	0	0	0	0.129166667
22/03/2005 04:00:00	0	0	0	0	0	0	0	0	0	0	0	0	0.129166667
22/03/2005 05:00:00	0	0	0	0	0	0	0	0	0	0	0	0	0.129166667
22/03/2005 06:00:00	0	0	0	0	0	0	0	0	0	0	0	0	0.129166667
22/03/2005 07:00:00	0	0	0	0	0	0	0	0	0	0	0	0	0.129166667
22/03/2005 08:00:00	0	0	0	0	0	0	0	0	0	0	0	0	0.129166667
22/03/2005 09:00:00	0	0	0	0	0	0	0	0	0	0	0	0	0.129166667
22/03/2005 10:00:00	0	0	0	0	0	0	0	0	0	0	0	0	0.129166667
22/03/2005 11:00:00	0	0	0	0	0	0	0	0	0	0	0	0	0.129166667
22/03/2005 12:00:00	0	0	0	0	0	0	0	0	0	0	0	0	0.129166667
22/03/2005 13:00:00	0	0	0	0	0	0	0	0	0	0	0	0	0.129166667
22/03/2005 14:00:00	0	0	0	0	0	0	0	0	0	0	0	0	0.129166667
22/03/2005 15:00:00	0	0	0	0	0	0	0	0	0	0	0	0	0.129166667
22/03/2005 16:00:00	0	0	0	0	0	0	0	0	0	0	0	0	0.129166667
22/03/2005 17:00:00	0	0	0	0	0	0	0	0	0	0	0	0	0.129166667
22/03/2005 18:00:00	0	0	0	0	0	0	0	0	0	0	0	0	0.129166667
22/03/2005 19:00:00	0	0	0	0	0	0	0	0	0	0	0	0	0.129166667
22/03/2005 20:00:00	0	0	0	0	0	0	0	0	0	0	0	0	0.129166667
22/03/2005 21:00:00	0	0	0	0	0	0	0	0	0	0	0	0	0.129166667
22/03/2005 22:00:00	0	0	0	0	0	0	0	0	0	0	0	0	0.129166667
22/03/2005 23:00:00	0	0	0	0	0	0	0	0	0	0	0	0	0.129166667
23/03/2005 00:00:00	0	0	0	0	0	0	0	0	0	0	0	0	0
23/03/2005 01:00:00	0	0	0	0	0	0	0	0	0	0	0	0	0
23/03/2005 02:00:00	0	0	0	0	0	0	0	0	0	0	0	0	0
23/03/2005 03:00:00	0	0	0	0	0	0	0	0	0	0	0	0	0
23/03/2005 04:00:00	0	0	0	0	0	0	0	0	0	0	0	0	0
23/03/2005 05:00:00	0	0	0	0	0	0	0	0	0	0	0	0	0
23/03/2005 06:00:00	0	0	0	0	0	0	0	0	0	0	0	0	0
23/03/2005 07:00:00	0	0	0	0	0	0	0	0	0	0	0	0	0
23/03/2005 08:00:00	0	0	0	0	0	0	0	0	0	0	0	0	0
23/03/2005 09:00:00	0	0	0	0	0	0	0	0	0	0	0	0	0
23/03/2005 10:00:00	0	0	0	0	0	0	0	0	0	0	0	0	0
23/03/2005 11:00:00	0	0	0	0	0	0	0	0	0	0	0	0	0
23/03/2005 12:00:00	0	0	0	0	0	0	0	0	0	0	0	0	0
23/03/2005 13:00:00	0	0	0	0	0	0	0	0	0	0	0	0	0
23/03/2005 14:00:00	0	0	0	0	0	0	0	0	0	0	0	0	0
23/03/2005 15:00:00	0	0	0	0	0	0	0	0	0	0	0	0	0
23/03/2005 16:00:00	0	0	0	0	0	0	0	0	0	0	0	0	0
23/03/2005 17:00:00	0	0	0	0	0	0	0	0	0	0	0	0	0
23/03/2005 18:00:00	0	0	0	0	0	0	0	0	0	0	0	0	0
23/03/2005 19:00:00	0	0	0	0	0	0	0	0	0	0	0	0	0
23/03/2005 20:00:00	0	0	0	0	0	0	0	0	0	0	0	0	0
23/03/2005 21:00:00	0	0	0	0	0	0	0	0	0	0	0	0	0
23/03/2005 22:00:00	0	0	0	0	0	0	0	0	0	0	0	0	0
23/03/2005 23:00:00	0	0	0	0	0	0	0	0	0	0	0	0	0
24/03/2005 00:00:00	0	0	0	0	0	0	0	0	0	0	0	0	0
24/03/2005 01:00:00	0	0	0	0	0	0	0	0	0	0	0	0	0
24/03/2005 02:00:00	0	0	0	0	0	0	0	0	0	0	0	0	0
24/03/2005 03:00:00	0	0	0	0	0	0	0	0	0	0	0	0	0
24/03/2005 04:00:00	0	0	0	0	0	0	0	0	0	0	0	0	0
24/03/2005 05:00:00	0	0	0	0	0	0	0	0	0	0	0	0	0
24/03/2005 06:00:00	0	0	0	0	0	0	0	0	0	0	0	0	0
24/03/2005 07:00:00	0	0	0	0	0	0	0	0	0	0	0	0	0
24/03/2005 08:00:00	0	0	0	0	0	0	0	0	0	0	0	0	0
24/03/2005 09:00:00	0	0	0	0	0	0	0	0	0	0	0	0	0
24/03/2005 10:00:00	0	0	0	0	0	0	0	0	0	0	0	0	0
24/03/2005 11:00:00	0	0	0	0	0	0	0	0	0	0	0	0	0
24/03/2005 12:00:00	0	0	0	0	0	0	0	0	0	0	0	0	0
24/03/2005 13:00:00	0	0	0	0	0	0	0	0	0	0	0	0	0
24/03/2005 14:00:00	0	0	0	0	0	0	0	0	0	0	0	0	0
24/03/2005 15:00:00	0	0	0	0	0	0	0	0	0	0	0	0	0
24/03/2005 16:00:00	0	0	0	0	0	0	0	0	0	0	0	0	0
24/03/2005 17:00:00	0	0	0	0	0	0	0	0	0	0	0	0	0
24/03/2005 18:00:00	0	0	0	0	0	0	0	0	0	0	0	0	0
24/03/2005 19:00:00	0	0	0	0	0	0	0	0	0	0	0	0	0
24/03/2005 20:00:00	0	0	0	0	0	0	0	0	0	0	0	0	0
24/03/2005 21:00:00	0	0	0	0	0	0	0	0	0	0	0	0	0
24/03/2005 22:00:00	0	0	0	0	0	0	0	0	0	0	0	0	0
24/03/2005 23:00:00	0	0	0	0	0	0	0	0	0	0	0	0	0
25/03/2005 00:00:00	0.041666667	0.0875	0.670833333	0.066666667	0.0625	0.033333333	0.095833333	0.045833333	0	0	0	0	0.029166667
25/03/2005 01:00:00	0.041666667	0.0875	0.670833333	0.066666667	0.0625	0.033333333	0.095833333	0.045833333	0	0	0	0	0.029166667
25/03/2005 02:00:00	0.041666667	0.0875	0.670833333	0.066666667	0.0625	0.033333333	0.095833333	0.045833333	0	0	0	0	0.029166667
25/03/2005 03:00:00	0.041666667	0.0875	0.670833333	0.066666667	0.0625	0.033333333	0.095833333	0.045833333	0	0	0	0	0.029166667
25/03/2005 04:00:00	0.041666667	0.0875	0.670833333	0.066666667	0.0625	0.033333333	0.095833333	0.045833333	0	0	0	0	0.029166667
25/03/2005 05:00:00	0.041666667	0.0875	0.670833333	0.066666667	0.0625	0.033333333	0.095833333	0.045833333	0	0	0	0	0.029166667
25/03/2005 06:00:00	0.041666667	0.0875	0.670833333	0.066666667	0.0625	0.033333333	0.095833333	0.045833333	0	0	0	0	0.029166667
[truncated: 6,761 more rows]
