# Supplementary material for: Flood Prediction in Ungauged Basins by Physical-Based TOPKAPI Model
Source: Hindawi journal article supplement (doi:10.1155/2019/4795853), 2019-09-05
Supplement: f1 [file 4795853.f1.zip › 4795853.f1/xxdpre_2006.csv]

time	50220150	50220550	50220700	50220850	50221900	50222450	50223650	50223900	50224350	50224650	50224750	50225350	50227850
01/01/2006 00:00:00	0	0	0	0	0	0	0	0	0	0	0	0	0
01/01/2006 01:00:00	0	0	0	0	0	0	0	0	0	0	0	0	0
01/01/2006 02:00:00	0	0	0	0	0	0	0	0	0	0	0	0	0
01/01/2006 03:00:00	0	0	0	0	0	0	0	0	0	0	0	0	0
01/01/2006 04:00:00	0	0	0	0	0	0	0	0	0	0	0	0	0
01/01/2006 05:00:00	0	0	0	0	0	0	0	0	0	0	0	0	0
01/01/2006 06:00:00	0	0	0	0	0	0	0	0	0	0	0	0	0
01/01/2006 07:00:00	0	0	0	0	0	0	0	0	0	0	0	0	0
01/01/2006 08:00:00	0	0	0	0	0	0	0	0	0	0	0	0	0
01/01/2006 09:00:00	0	0	0	0	0	0	0	0	0	0	0	0	0
01/01/2006 10:00:00	0	0	0	0	0	0	0	0	0	0	0	0	0
01/01/2006 11:00:00	0	0	0	0	0	0	0	0	0	0	0	0	0
01/01/2006 12:00:00	0	0	0	0	0	0	0	0	0	0	0	0	0
01/01/2006 13:00:00	0	0	0	0	0	0	0	0	0	0	0	0	0
01/01/2006 14:00:00	0	0	0	0	0	0	0	0	0	0	0	0	0
01/01/2006 15:00:00	0	0	0	0	0	0	0	0	0	0	0	0	0
01/01/2006 16:00:00	0	0	0	0	0	0	0	0	0	0	0	0	0
01/01/2006 17:00:00	0	0	0	0	0	0	0	0	0	0	0	0	0
01/01/2006 18:00:00	0	0	0	0	0	0	0	0	0	0	0	0	0
01/01/2006 19:00:00	0	0	0	0	0	0	0	0	0	0	0	0	0
01/01/2006 20:00:00	0	0	0	0	0	0	0	0	0	0	0	0	0
01/01/2006 21:00:00	0	0	0	0	0	0	0	0	0	0	0	0	0
01/01/2006 22:00:00	0	0	0	0	0	0	0	0	0	0	0	0	0
01/01/2006 23:00:00	0	0	0	0	0	0	0	0	0	0	0	0	0
02/01/2006 00:00:00	0	0	0	0	0	0	0	0	0	0	0	0	0.004166667
02/01/2006 01:00:00	0	0	0	0	0	0	0	0	0	0	0	0	0.004166667
02/01/2006 02:00:00	0	0	0	0	0	0	0	0	0	0	0	0	0.004166667
02/01/2006 03:00:00	0	0	0	0	0	0	0	0	0	0	0	0	0.004166667
02/01/2006 04:00:00	0	0	0	0	0	0	0	0	0	0	0	0	0.004166667
02/01/2006 05:00:00	0	0	0	0	0	0	0	0	0	0	0	0	0.004166667
02/01/2006 06:00:00	0	0	0	0	0	0	0	0	0	0	0	0	0.004166667
02/01/2006 07:00:00	0	0	0	0	0	0	0	0	0	0	0	0	0.004166667
02/01/2006 08:00:00	0	0	0	0	0	0	0	0	0	0	0	0	0.004166667
02/01/2006 09:00:00	0	0	0	0	0	0	0	0	0	0	0	0	0.004166667
02/01/2006 10:00:00	0	0	0	0	0	0	0	0	0	0	0	0	0.004166667
02/01/2006 11:00:00	0	0	0	0	0	0	0	0	0	0	0	0	0.004166667
02/01/2006 12:00:00	0	0	0	0	0	0	0	0	0	0	0	0	0.004166667
02/01/2006 13:00:00	0	0	0	0	0	0	0	0	0	0	0	0	0.004166667
02/01/2006 14:00:00	0	0	0	0	0	0	0	0	0	0	0	0	0.004166667
02/01/2006 15:00:00	0	0	0	0	0	0	0	0	0	0	0	0	0.004166667
02/01/2006 16:00:00	0	0	0	0	0	0	0	0	0	0	0	0	0.004166667
02/01/2006 17:00:00	0	0	0	0	0	0	0	0	0	0	0	0	0.004166667
02/01/2006 18:00:00	0	0	0	0	0	0	0	0	0	0	0	0	0.004166667
02/01/2006 19:00:00	0	0	0	0	0	0	0	0	0	0	0	0	0.004166667
02/01/2006 20:00:00	0	0	0	0	0	0	0	0	0	0	0	0	0.004166667
02/01/2006 21:00:00	0	0	0	0	0	0	0	0	0	0	0	0	0.004166667
02/01/2006 22:00:00	0	0	0	0	0	0	0	0	0	0	0	0	0.004166667
02/01/2006 23:00:00	0	0	0	0	0	0	0	0	0	0	0	0	0.004166667
03/01/2006 00:00:00	0.254166667	0.079166667	0.408333333	0.195833333	0.275	0.158333333	0.2125	0.158333333	0.366666667	0.308333333	0.325	0.095833333	0.2
03/01/2006 01:00:00	0.254166667	0.079166667	0.408333333	0.195833333	0.275	0.158333333	0.2125	0.158333333	0.366666667	0.308333333	0.325	0.095833333	0.2
03/01/2006 02:00:00	0.254166667	0.079166667	0.408333333	0.195833333	0.275	0.158333333	0.2125	0.158333333	0.366666667	0.308333333	0.325	0.095833333	0.2
03/01/2006 03:00:00	0.254166667	0.079166667	0.408333333	0.195833333	0.275	0.158333333	0.2125	0.158333333	0.366666667	0.308333333	0.325	0.095833333	0.2
03/01/2006 04:00:00	0.254166667	0.079166667	0.408333333	0.195833333	0.275	0.158333333	0.2125	0.158333333	0.366666667	0.308333333	0.325	0.095833333	0.2
03/01/2006 05:00:00	0.254166667	0.079166667	0.408333333	0.195833333	0.275	0.158333333	0.2125	0.158333333	0.366666667	0.308333333	0.325	0.095833333	0.2
03/01/2006 06:00:00	0.254166667	0.079166667	0.408333333	0.195833333	0.275	0.158333333	0.2125	0.158333333	0.366666667	0.308333333	0.325	0.095833333	0.2
03/01/2006 07:00:00	0.254166667	0.079166667	0.408333333	0.195833333	0.275	0.158333333	0.2125	0.158333333	0.366666667	0.308333333	0.325	0.095833333	0.2
03/01/2006 08:00:00	0.254166667	0.079166667	0.408333333	0.195833333	0.275	0.158333333	0.2125	0.158333333	0.366666667	0.308333333	0.325	0.095833333	0.2
03/01/2006 09:00:00	0.254166667	0.079166667	0.408333333	0.195833333	0.275	0.158333333	0.2125	0.158333333	0.366666667	0.308333333	0.325	0.095833333	0.2
03/01/2006 10:00:00	0.254166667	0.079166667	0.408333333	0.195833333	0.275	0.158333333	0.2125	0.158333333	0.366666667	0.308333333	0.325	0.095833333	0.2
03/01/2006 11:00:00	0.254166667	0.079166667	0.408333333	0.195833333	0.275	0.158333333	0.2125	0.158333333	0.366666667	0.308333333	0.325	0.095833333	0.2
03/01/2006 12:00:00	0.254166667	0.079166667	0.408333333	0.195833333	0.275	0.158333333	0.2125	0.158333333	0.366666667	0.308333333	0.325	0.095833333	0.2
03/01/2006 13:00:00	0.254166667	0.079166667	0.408333333	0.195833333	0.275	0.158333333	0.2125	0.158333333	0.366666667	0.308333333	0.325	0.095833333	0.2
03/01/2006 14:00:00	0.254166667	0.079166667	0.408333333	0.195833333	0.275	0.158333333	0.2125	0.158333333	0.366666667	0.308333333	0.325	0.095833333	0.2
03/01/2006 15:00:00	0.254166667	0.079166667	0.408333333	0.195833333	0.275	0.158333333	0.2125	0.158333333	0.366666667	0.308333333	0.325	0.095833333	0.2
03/01/2006 16:00:00	0.254166667	0.079166667	0.408333333	0.195833333	0.275	0.158333333	0.2125	0.158333333	0.366666667	0.308333333	0.325	0.095833333	0.2
03/01/2006 17:00:00	0.254166667	0.079166667	0.408333333	0.195833333	0.275	0.158333333	0.2125	0.158333333	0.366666667	0.308333333	0.325	0.095833333	0.2
03/01/2006 18:00:00	0.254166667	0.079166667	0.408333333	0.195833333	0.275	0.158333333	0.2125	0.158333333	0.366666667	0.308333333	0.325	0.095833333	0.2
03/01/2006 19:00:00	0.254166667	0.079166667	0.408333333	0.195833333	0.275	0.158333333	0.2125	0.158333333	0.366666667	0.308333333	0.325	0.095833333	0.2
03/01/2006 20:00:00	0.254166667	0.079166667	0.408333333	0.195833333	0.275	0.158333333	0.2125	0.158333333	0.366666667	0.308333333	0.325	0.095833333	0.2
03/01/2006 21:00:00	0.254166667	0.079166667	0.408333333	0.195833333	0.275	0.158333333	0.2125	0.158333333	0.366666667	0.308333333	0.325	0.095833333	0.2
03/01/2006 22:00:00	0.254166667	0.079166667	0.408333333	0.195833333	0.275	0.158333333	0.2125	0.158333333	0.366666667	0.308333333	0.325	0.095833333	0.2
03/01/2006 23:00:00	0.254166667	0.079166667	0.408333333	0.195833333	0.275	0.158333333	0.2125	0.158333333	0.366666667	0.308333333	0.325	0.095833333	0.2
04/01/2006 00:00:00	0.341666667	0.0875	0.520833333	0.075	0.216666667	0.104166667	0.266666667	0	0.375	0.2875	0.329166667	0.2375	0.479166667
04/01/2006 01:00:00	0.341666667	0.0875	0.520833333	0.075	0.216666667	0.104166667	0.266666667	0	0.375	0.2875	0.329166667	0.2375	0.479166667
04/01/2006 02:00:00	0.341666667	0.0875	0.520833333	0.075	0.216666667	0.104166667	0.266666667	0	0.375	0.2875	0.329166667	0.2375	0.479166667
04/01/2006 03:00:00	0.341666667	0.0875	0.520833333	0.075	0.216666667	0.104166667	0.266666667	0	0.375	0.2875	0.329166667	0.2375	0.479166667
04/01/2006 04:00:00	0.341666667	0.0875	0.520833333	0.075	0.216666667	0.104166667	0.266666667	0	0.375	0.2875	0.329166667	0.2375	0.479166667
04/01/2006 05:00:00	0.341666667	0.0875	0.520833333	0.075	0.216666667	0.104166667	0.266666667	0	0.375	0.2875	0.329166667	0.2375	0.479166667
04/01/2006 06:00:00	0.341666667	0.0875	0.520833333	0.075	0.216666667	0.104166667	0.266666667	0	0.375	0.2875	0.329166667	0.2375	0.479166667
04/01/2006 07:00:00	0.341666667	0.0875	0.520833333	0.075	0.216666667	0.104166667	0.266666667	0	0.375	0.2875	0.329166667	0.2375	0.479166667
04/01/2006 08:00:00	0.341666667	0.0875	0.520833333	0.075	0.216666667	0.104166667	0.266666667	0	0.375	0.2875	0.329166667	0.2375	0.479166667
04/01/2006 09:00:00	0.341666667	0.0875	0.520833333	0.075	0.216666667	0.104166667	0.266666667	0	0.375	0.2875	0.329166667	0.2375	0.479166667
04/01/2006 10:00:00	0.341666667	0.0875	0.520833333	0.075	0.216666667	0.104166667	0.266666667	0	0.375	0.2875	0.329166667	0.2375	0.479166667
04/01/2006 11:00:00	0.341666667	0.0875	0.520833333	0.075	0.216666667	0.104166667	0.266666667	0	0.375	0.2875	0.329166667	0.2375	0.479166667
04/01/2006 12:00:00	0.341666667	0.0875	0.520833333	0.075	0.216666667	0.104166667	0.266666667	0	0.375	0.2875	0.329166667	0.2375	0.479166667
04/01/2006 13:00:00	0.341666667	0.0875	0.520833333	0.075	0.216666667	0.104166667	0.266666667	0	0.375	0.2875	0.329166667	0.2375	0.479166667
04/01/2006 14:00:00	0.341666667	0.0875	0.520833333	0.075	0.216666667	0.104166667	0.266666667	0	0.375	0.2875	0.329166667	0.2375	0.479166667
04/01/2006 15:00:00	0.341666667	0.0875	0.520833333	0.075	0.216666667	0.104166667	0.266666667	0	0.375	0.2875	0.329166667	0.2375	0.479166667
04/01/2006 16:00:00	0.341666667	0.0875	0.520833333	0.075	0.216666667	0.104166667	0.266666667	0	0.375	0.2875	0.329166667	0.2375	0.479166667
04/01/2006 17:00:00	0.341666667	0.0875	0.520833333	0.075	0.216666667	0.104166667	0.266666667	0	0.375	0.2875	0.329166667	0.2375	0.479166667
04/01/2006 18:00:00	0.341666667	0.0875	0.520833333	0.075	0.216666667	0.104166667	0.266666667	0	0.375	0.2875	0.329166667	0.2375	0.479166667
04/01/2006 19:00:00	0.341666667	0.0875	0.520833333	0.075	0.216666667	0.104166667	0.266666667	0	0.375	0.2875	0.329166667	0.2375	0.479166667
04/01/2006 20:00:00	0.341666667	0.0875	0.520833333	0.075	0.216666667	0.104166667	0.266666667	0	0.375	0.2875	0.329166667	0.2375	0.479166667
04/01/2006 21:00:00	0.341666667	0.0875	0.520833333	0.075	0.216666667	0.104166667	0.266666667	0	0.375	0.2875	0.329166667	0.2375	0.479166667
04/01/2006 22:00:00	0.341666667	0.0875	0.520833333	0.075	0.216666667	0.104166667	0.266666667	0	0.375	0.2875	0.329166667	0.2375	0.479166667
04/01/2006 23:00:00	0.341666667	0.0875	0.520833333	0.075	0.216666667	0.104166667	0.266666667	0	0.375	0.2875	0.329166667	0.2375	0.479166667
05/01/2006 00:00:00	0	0	0	0	0	0	0	0	0	0	0	0	0
05/01/2006 01:00:00	0	0	0	0	0	0	0	0	0	0	0	0	0
05/01/2006 02:00:00	0	0	0	0	0	0	0	0	0	0	0	0	0
05/01/2006 03:00:00	0	0	0	0	0	0	0	0	0	0	0	0	0
05/01/2006 04:00:00	0	0	0	0	0	0	0	0	0	0	0	0	0
05/01/2006 05:00:00	0	0	0	0	0	0	0	0	0	0	0	0	0
05/01/2006 06:00:00	0	0	0	0	0	0	0	0	0	0	0	0	0
05/01/2006 07:00:00	0	0	0	0	0	0	0	0	0	0	0	0	0
05/01/2006 08:00:00	0	0	0	0	0	0	0	0	0	0	0	0	0
05/01/2006 09:00:00	0	0	0	0	0	0	0	0	0	0	0	0	0
05/01/2006 10:00:00	0	0	0	0	0	0	0	0	0	0	0	0	0
05/01/2006 11:00:00	0	0	0	0	0	0	0	0	0	0	0	0	0
05/01/2006 12:00:00	0	0	0	0	0	0	0	0	0	0	0	0	0
05/01/2006 13:00:00	0	0	0	0	0	0	0	0	0	0	0	0	0
05/01/2006 14:00:00	0	0	0	0	0	0	0	0	0	0	0	0	0
05/01/2006 15:00:00	0	0	0	0	0	0	0	0	0	0	0	0	0
05/01/2006 16:00:00	0	0	0	0	0	0	0	0	0	0	0	0	0
05/01/2006 17:00:00	0	0	0	0	0	0	0	0	0	0	0	0	0
05/01/2006 18:00:00	0	0	0	0	0	0	0	0	0	0	0	0	0
05/01/2006 19:00:00	0	0	0	0	0	0	0	0	0	0	0	0	0
05/01/2006 20:00:00	0	0	0	0	0	0	0	0	0	0	0	0	0
05/01/2006 21:00:00	0	0	0	0	0	0	0	0	0	0	0	0	0
05/01/2006 22:00:00	0	0	0	0	0	0	0	0	0	0	0	0	0
05/01/2006 23:00:00	0	0	0	0	0	0	0	0	0	0	0	0	0
06/01/2006 00:00:00	0	0	0	0	0	0	0	0	0	0	0	0	0
06/01/2006 01:00:00	0	0	0	0	0	0	0	0	0	0	0	0	0
06/01/2006 02:00:00	0	0	0	0	0	0	0	0	0	0	0	0	0
06/01/2006 03:00:00	0	0	0	0	0	0	0	0	0	0	0	0	0
06/01/2006 04:00:00	0	0	0	0	0	0	0	0	0	0	0	0	0
06/01/2006 05:00:00	0	0	0	0	0	0	0	0	0	0	0	0	0
06/01/2006 06:00:00	0	0	0	0	0	0	0	0	0	0	0	0	0
06/01/2006 07:00:00	0	0	0	0	0	0	0	0	0	0	0	0	0
06/01/2006 08:00:00	0	0	0	0	0	0	0	0	0	0	0	0	0
06/01/2006 09:00:00	0	0	0	0	0	0	0	0	0	0	0	0	0
06/01/2006 10:00:00	0	0	0	0	0	0	0	0	0	0	0	0	0
06/01/2006 11:00:00	0	0	0	0	0	0	0	0	0	0	0	0	0
06/01/2006 12:00:00	0	0	0	0	0	0	0	0	0	0	0	0	0
06/01/2006 13:00:00	0	0	0	0	0	0	0	0	0	0	0	0	0
06/01/2006 14:00:00	0	0	0	0	0	0	0	0	0	0	0	0	0
06/01/2006 15:00:00	0	0	0	0	0	0	0	0	0	0	0	0	0
06/01/2006 16:00:00	0	0	0	0	0	0	0	0	0	0	0	0	0
06/01/2006 17:00:00	0	0	0	0	0	0	0	0	0	0	0	0	0
06/01/2006 18:00:00	0	0	0	0	0	0	0	0	0	0	0	0	0
06/01/2006 19:00:00	0	0	0	0	0	0	0	0	0	0	0	0	0
06/01/2006 20:00:00	0	0	0	0	0	0	0	0	0	0	0	0	0
06/01/2006 21:00:00	0	0	0	0	0	0	0	0	0	0	0	0	0
06/01/2006 22:00:00	0	0	0	0	0	0	0	0	0	0	0	0	0
06/01/2006 23:00:00	0	0	0	0	0	0	0	0	0	0	0	0	0
07/01/2006 00:00:00	0	0	0	0	0	0	0	0	0	0	0	0	0
07/01/2006 01:00:00	0	0	0	0	0	0	0	0	0	0	0	0	0
07/01/2006 02:00:00	0	0	0	0	0	0	0	0	0	0	0	0	0
07/01/2006 03:00:00	0	0	0	0	0	0	0	0	0	0	0	0	0
07/01/2006 04:00:00	0	0	0	0	0	0	0	0	0	0	0	0	0
07/01/2006 05:00:00	0	0	0	0	0	0	0	0	0	0	0	0	0
07/01/2006 06:00:00	0	0	0	0	0	0	0	0	0	0	0	0	0
07/01/2006 07:00:00	0	0	0	0	0	0	0	0	0	0	0	0	0
07/01/2006 08:00:00	0	0	0	0	0	0	0	0	0	0	0	0	0
07/01/2006 09:00:00	0	0	0	0	0	0	0	0	0	0	0	0	0
07/01/2006 10:00:00	0	0	0	0	0	0	0	0	0	0	0	0	0
07/01/2006 11:00:00	0	0	0	0	0	0	0	0	0	0	0	0	0
07/01/2006 12:00:00	0	0	0	0	0	0	0	0	0	0	0	0	0
07/01/2006 13:00:00	0	0	0	0	0	0	0	0	0	0	0	0	0
07/01/2006 14:00:00	0	0	0	0	0	0	0	0	0	0	0	0	0
07/01/2006 15:00:00	0	0	0	0	0	0	0	0	0	0	0	0	0
07/01/2006 16:00:00	0	0	0	0	0	0	0	0	0	0	0	0	0
07/01/2006 17:00:00	0	0	0	0	0	0	0	0	0	0	0	0	0
07/01/2006 18:00:00	0	0	0	0	0	0	0	0	0	0	0	0	0
07/01/2006 19:00:00	0	0	0	0	0	0	0	0	0	0	0	0	0
07/01/2006 20:00:00	0	0	0	0	0	0	0	0	0	0	0	0	0
07/01/2006 21:00:00	0	0	0	0	0	0	0	0	0	0	0	0	0
07/01/2006 22:00:00	0	0	0	0	0	0	0	0	0	0	0	0	0
07/01/2006 23:00:00	0	0	0	0	0	0	0	0	0	0	0	0	0
08/01/2006 00:00:00	0	0	0	0	0	0	0	0	0	0	0	0	0
08/01/2006 01:00:00	0	0	0	0	0	0	0	0	0	0	0	0	0
08/01/2006 02:00:00	0	0	0	0	0	0	0	0	0	0	0	0	0
08/01/2006 03:00:00	0	0	0	0	0	0	0	0	0	0	0	0	0
08/01/2006 04:00:00	0	0	0	0	0	0	0	0	0	0	0	0	0
08/01/2006 05:00:00	0	0	0	0	0	0	0	0	0	0	0	0	0
08/01/2006 06:00:00	0	0	0	0	0	0	0	0	0	0	0	0	0
08/01/2006 07:00:00	0	0	0	0	0	0	0	0	0	0	0	0	0
08/01/2006 08:00:00	0	0	0	0	0	0	0	0	0	0	0	0	0
08/01/2006 09:00:00	0	0	0	0	0	0	0	0	0	0	0	0	0
08/01/2006 10:00:00	0	0	0	0	0	0	0	0	0	0	0	0	0
08/01/2006 11:00:00	0	0	0	0	0	0	0	0	0	0	0	0	0
08/01/2006 12:00:00	0	0	0	0	0	0	0	0	0	0	0	0	0
08/01/2006 13:00:00	0	0	0	0	0	0	0	0	0	0	0	0	0
08/01/2006 14:00:00	0	0	0	0	0	0	0	0	0	0	0	0	0
08/01/2006 15:00:00	0	0	0	0	0	0	0	0	0	0	0	0	0
08/01/2006 16:00:00	0	0	0	0	0	0	0	0	0	0	0	0	0
08/01/2006 17:00:00	0	0	0	0	0	0	0	0	0	0	0	0	0
08/01/2006 18:00:00	0	0	0	0	0	0	0	0	0	0	0	0	0
08/01/2006 19:00:00	0	0	0	0	0	0	0	0	0	0	0	0	0
08/01/2006 20:00:00	0	0	0	0	0	0	0	0	0	0	0	0	0
08/01/2006 21:00:00	0	0	0	0	0	0	0	0	0	0	0	0	0
08/01/2006 22:00:00	0	0	0	0	0	0	0	0	0	0	0	0	0
08/01/2006 23:00:00	0	0	0	0	0	0	0	0	0	0	0	0	0
09/01/2006 00:00:00	0	0	0	0	0	0	0	0	0	0	0	0	0
09/01/2006 01:00:00	0	0	0	0	0	0	0	0	0	0	0	0	0
09/01/2006 02:00:00	0	0	0	0	0	0	0	0	0	0	0	0	0
09/01/2006 03:00:00	0	0	0	0	0	0	0	0	0	0	0	0	0
09/01/2006 04:00:00	0	0	0	0	0	0	0	0	0	0	0	0	0
09/01/2006 05:00:00	0	0	0	0	0	0	0	0	0	0	0	0	0
09/01/2006 06:00:00	0	0	0	0	0	0	0	0	0	0	0	0	0
09/01/2006 07:00:00	0	0	0	0	0	0	0	0	0	0	0	0	0
09/01/2006 08:00:00	0	0	0	0	0	0	0	0	0	0	0	0	0
09/01/2006 09:00:00	0	0	0	0	0	0	0	0	0	0	0	0	0
09/01/2006 10:00:00	0	0	0	0	0	0	0	0	0	0	0	0	0
09/01/2006 11:00:00	0	0	0	0	0	0	0	0	0	0	0	0	0
09/01/2006 12:00:00	0	0	0	0	0	0	0	0	0	0	0	0	0
09/01/2006 13:00:00	0	0	0	0	0	0	0	0	0	0	0	0	0
09/01/2006 14:00:00	0	0	0	0	0	0	0	0	0	0	0	0	0
09/01/2006 15:00:00	0	0	0	0	0	0	0	0	0	0	0	0	0
09/01/2006 16:00:00	0	0	0	0	0	0	0	0	0	0	0	0	0
09/01/2006 17:00:00	0	0	0	0	0	0	0	0	0	0	0	0	0
09/01/2006 18:00:00	0	0	0	0	0	0	0	0	0	0	0	0	0
09/01/2006 19:00:00	0	0	0	0	0	0	0	0	0	0	0	0	0
09/01/2006 20:00:00	0	0	0	0	0	0	0	0	0	0	0	0	0
09/01/2006 21:00:00	0	0	0	0	0	0	0	0	0	0	0	0	0
09/01/2006 22:00:00	0	0	0	0	0	0	0	0	0	0	0	0	0
09/01/2006 23:00:00	0	0	0	0	0	0	0	0	0	0	0	0	0
10/01/2006 00:00:00	0	0	0	0	0	0	0	0	0	0	0	0	0
10/01/2006 01:00:00	0	0	0	0	0	0	0	0	0	0	0	0	0
10/01/2006 02:00:00	0	0	0	0	0	0	0	0	0	0	0	0	0
10/01/2006 03:00:00	0	0	0	0	0	0	0	0	0	0	0	0	0
10/01/2006 04:00:00	0	0	0	0	0	0	0	0	0	0	0	0	0
10/01/2006 05:00:00	0	0	0	0	0	0	0	0	0	0	0	0	0
10/01/2006 06:00:00	0	0	0	0	0	0	0	0	0	0	0	0	0
10/01/2006 07:00:00	0	0	0	0	0	0	0	0	0	0	0	0	0
10/01/2006 08:00:00	0	0	0	0	0	0	0	0	0	0	0	0	0
10/01/2006 09:00:00	0	0	0	0	0	0	0	0	0	0	0	0	0
10/01/2006 10:00:00	0	0	0	0	0	0	0	0	0	0	0	0	0
10/01/2006 11:00:00	0	0	0	0	0	0	0	0	0	0	0	0	0
10/01/2006 12:00:00	0	0	0	0	0	0	0	0	0	0	0	0	0
10/01/2006 13:00:00	0	0	0	0	0	0	0	0	0	0	0	0	0
10/01/2006 14:00:00	0	0	0	0	0	0	0	0	0	0	0	0	0
10/01/2006 15:00:00	0	0	0	0	0	0	0	0	0	0	0	0	0
10/01/2006 16:00:00	0	0	0	0	0	0	0	0	0	0	0	0	0
10/01/2006 17:00:00	0	0	0	0	0	0	0	0	0	0	0	0	0
10/01/2006 18:00:00	0	0	0	0	0	0	0	0	0	0	0	0	0
10/01/2006 19:00:00	0	0	0	0	0	0	0	0	0	0	0	0	0
10/01/2006 20:00:00	0	0	0	0	0	0	0	0	0	0	0	0	0
10/01/2006 21:00:00	0	0	0	0	0	0	0	0	0	0	0	0	0
10/01/2006 22:00:00	0	0	0	0	0	0	0	0	0	0	0	0	0
10/01/2006 23:00:00	0	0	0	0	0	0	0	0	0	0	0	0	0
11/01/2006 00:00:00	0	0	0	0	0	0	0	0	0	0	0	0	0
11/01/2006 01:00:00	0	0	0	0	0	0	0	0	0	0	0	0	0
11/01/2006 02:00:00	0	0	0	0	0	0	0	0	0	0	0	0	0
11/01/2006 03:00:00	0	0	0	0	0	0	0	0	0	0	0	0	0
11/01/2006 04:00:00	0	0	0	0	0	0	0	0	0	0	0	0	0
11/01/2006 05:00:00	0	0	0	0	0	0	0	0	0	0	0	0	0
11/01/2006 06:00:00	0	0	0	0	0	0	0	0	0	0	0	0	0
11/01/2006 07:00:00	0	0	0	0	0	0	0	0	0	0	0	0	0
11/01/2006 08:00:00	0	0	0	0	0	0	0	0	0	0	0	0	0
11/01/2006 09:00:00	0	0	0	0	0	0	0	0	0	0	0	0	0
11/01/2006 10:00:00	0	0	0	0	0	0	0	0	0	0	0	0	0
11/01/2006 11:00:00	0	0	0	0	0	0	0	0	0	0	0	0	0
11/01/2006 12:00:00	0	0	0	0	0	0	0	0	0	0	0	0	0
11/01/2006 13:00:00	0	0	0	0	0	0	0	0	0	0	0	0	0
11/01/2006 14:00:00	0	0	0	0	0	0	0	0	0	0	0	0	0
11/01/2006 15:00:00	0	0	0	0	0	0	0	0	0	0	0	0	0
11/01/2006 16:00:00	0	0	0	0	0	0	0	0	0	0	0	0	0
11/01/2006 17:00:00	0	0	0	0	0	0	0	0	0	0	0	0	0
11/01/2006 18:00:00	0	0	0	0	0	0	0	0	0	0	0	0	0
11/01/2006 19:00:00	0	0	0	0	0	0	0	0	0	0	0	0	0
11/01/2006 20:00:00	0	0	0	0	0	0	0	0	0	0	0	0	0
11/01/2006 21:00:00	0	0	0	0	0	0	0	0	0	0	0	0	0
11/01/2006 22:00:00	0	0	0	0	0	0	0	0	0	0	0	0	0
11/01/2006 23:00:00	0	0	0	0	0	0	0	0	0	0	0	0	0
12/01/2006 00:00:00	0	0	0	0	0	0	0	0	0	0	0	0	0
12/01/2006 01:00:00	0	0	0	0	0	0	0	0	0	0	0	0	0
12/01/2006 02:00:00	0	0	0	0	0	0	0	0	0	0	0	0	0
12/01/2006 03:00:00	0	0	0	0	0	0	0	0	0	0	0	0	0
12/01/2006 04:00:00	0	0	0	0	0	0	0	0	0	0	0	0	0
12/01/2006 05:00:00	0	0	0	0	0	0	0	0	0	0	0	0	0
12/01/2006 06:00:00	0	0	0	0	0	0	0	0	0	0	0	0	0
12/01/2006 07:00:00	0	0	0	0	0	0	0	0	0	0	0	0	0
12/01/2006 08:00:00	0	0	0	0	0	0	0	0	0	0	0	0	0
12/01/2006 09:00:00	0	0	0	0	0	0	0	0	0	0	0	0	0
12/01/2006 10:00:00	0	0	0	0	0	0	0	0	0	0	0	0	0
12/01/2006 11:00:00	0	0	0	0	0	0	0	0	0	0	0	0	0
12/01/2006 12:00:00	0	0	0	0	0	0	0	0	0	0	0	0	0
12/01/2006 13:00:00	0	0	0	0	0	0	0	0	0	0	0	0	0
12/01/2006 14:00:00	0	0	0	0	0	0	0	0	0	0	0	0	0
12/01/2006 15:00:00	0	0	0	0	0	0	0	0	0	0	0	0	0
12/01/2006 16:00:00	0	0	0	0	0	0	0	0	0	0	0	0	0
12/01/2006 17:00:00	0	0	0	0	0	0	0	0	0	0	0	0	0
12/01/2006 18:00:00	0	0	0	0	0	0	0	0	0	0	0	0	0
12/01/2006 19:00:00	0	0	0	0	0	0	0	0	0	0	0	0	0
12/01/2006 20:00:00	0	0	0	0	0	0	0	0	0	0	0	0	0
12/01/2006 21:00:00	0	0	0	0	0	0	0	0	0	0	0	0	0
12/01/2006 22:00:00	0	0	0	0	0	0	0	0	0	0	0	0	0
12/01/2006 23:00:00	0	0	0	0	0	0	0	0	0	0	0	0	0
13/01/2006 00:00:00	0	0	0	0	0	0	0	0	0	0	0	0	0.008333333
13/01/2006 01:00:00	0	0	0	0	0	0	0	0	0	0	0	0	0.008333333
13/01/2006 02:00:00	0	0	0	0	0	0	0	0	0	0	0	0	0.008333333
13/01/2006 03:00:00	0	0	0	0	0	0	0	0	0	0	0	0	0.008333333
13/01/2006 04:00:00	0	0	0	0	0	0	0	0	0	0	0	0	0.008333333
13/01/2006 05:00:00	0	0	0	0	0	0	0	0	0	0	0	0	0.008333333
13/01/2006 06:00:00	0	0	0	0	0	0	0	0	0	0	0	0	0.008333333
13/01/2006 07:00:00	0	0	0	0	0	0	0	0	0	0	0	0	0.008333333
13/01/2006 08:00:00	0	0	0	0	0	0	0	0	0	0	0	0	0.008333333
13/01/2006 09:00:00	0	0	0	0	0	0	0	0	0	0	0	0	0.008333333
13/01/2006 10:00:00	0	0	0	0	0	0	0	0	0	0	0	0	0.008333333
13/01/2006 11:00:00	0	0	0	0	0	0	0	0	0	0	0	0	0.008333333
13/01/2006 12:00:00	0	0	0	0	0	0	0	0	0	0	0	0	0.008333333
13/01/2006 13:00:00	0	0	0	0	0	0	0	0	0	0	0	0	0.008333333
13/01/2006 14:00:00	0	0	0	0	0	0	0	0	0	0	0	0	0.008333333
13/01/2006 15:00:00	0	0	0	0	0	0	0	0	0	0	0	0	0.008333333
13/01/2006 16:00:00	0	0	0	0	0	0	0	0	0	0	0	0	0.008333333
13/01/2006 17:00:00	0	0	0	0	0	0	0	0	0	0	0	0	0.008333333
13/01/2006 18:00:00	0	0	0	0	0	0	0	0	0	0	0	0	0.008333333
13/01/2006 19:00:00	0	0	0	0	0	0	0	0	0	0	0	0	0.008333333
13/01/2006 20:00:00	0	0	0	0	0	0	0	0	0	0	0	0	0.008333333
13/01/2006 21:00:00	0	0	0	0	0	0	0	0	0	0	0	0	0.008333333
13/01/2006 22:00:00	0	0	0	0	0	0	0	0	0	0	0	0	0.008333333
13/01/2006 23:00:00	0	0	0	0	0	0	0	0	0	0	0	0	0.008333333
14/01/2006 00:00:00	0	0	0	0	0.0125	0	0.016666667	0.008333333	0	0	0.0125	0	0.020833333
14/01/2006 01:00:00	0	0	0	0	0.0125	0	0.016666667	0.008333333	0	0	0.0125	0	0.020833333
14/01/2006 02:00:00	0	0	0	0	0.0125	0	0.016666667	0.008333333	0	0	0.0125	0	0.020833333
14/01/2006 03:00:00	0	0	0	0	0.0125	0	0.016666667	0.008333333	0	0	0.0125	0	0.020833333
14/01/2006 04:00:00	0	0	0	0	0.0125	0	0.016666667	0.008333333	0	0	0.0125	0	0.020833333
14/01/2006 05:00:00	0	0	0	0	0.0125	0	0.016666667	0.008333333	0	0	0.0125	0	0.020833333
14/01/2006 06:00:00	0	0	0	0	0.0125	0	0.016666667	0.008333333	0	0	0.0125	0	0.020833333
14/01/2006 07:00:00	0	0	0	0	0.0125	0	0.016666667	0.008333333	0	0	0.0125	0	0.020833333
14/01/2006 08:00:00	0	0	0	0	0.0125	0	0.016666667	0.008333333	0	0	0.0125	0	0.020833333
14/01/2006 09:00:00	0	0	0	0	0.0125	0	0.016666667	0.008333333	0	0	0.0125	0	0.020833333
14/01/2006 10:00:00	0	0	0	0	0.0125	0	0.016666667	0.008333333	0	0	0.0125	0	0.020833333
14/01/2006 11:00:00	0	0	0	0	0.0125	0	0.016666667	0.008333333	0	0	0.0125	0	0.020833333
14/01/2006 12:00:00	0	0	0	0	0.0125	0	0.016666667	0.008333333	0	0	0.0125	0	0.020833333
14/01/2006 13:00:00	0	0	0	0	0.0125	0	0.016666667	0.008333333	0	0	0.0125	0	0.020833333
14/01/2006 14:00:00	0	0	0	0	0.0125	0	0.016666667	0.008333333	0	0	0.0125	0	0.020833333
14/01/2006 15:00:00	0	0	0	0	0.0125	0	0.016666667	0.008333333	0	0	0.0125	0	0.020833333
14/01/2006 16:00:00	0	0	0	0	0.0125	0	0.016666667	0.008333333	0	0	0.0125	0	0.020833333
14/01/2006 17:00:00	0	0	0	0	0.0125	0	0.016666667	0.008333333	0	0	0.0125	0	0.020833333
14/01/2006 18:00:00	0	0	0	0	0.0125	0	0.016666667	0.008333333	0	0	0.0125	0	0.020833333
14/01/2006 19:00:00	0	0	0	0	0.0125	0	0.016666667	0.008333333	0	0	0.0125	0	0.020833333
14/01/2006 20:00:00	0	0	0	0	0.0125	0	0.016666667	0.008333333	0	0	0.0125	0	0.020833333
14/01/2006 21:00:00	0	0	0	0	0.0125	0	0.016666667	0.008333333	0	0	0.0125	0	0.020833333
14/01/2006 22:00:00	0	0	0	0	0.0125	0	0.016666667	0.008333333	0	0	0.0125	0	0.020833333
14/01/2006 23:00:00	0	0	0	0	0.0125	0	0.016666667	0.008333333	0	0	0.0125	0	0.020833333
15/01/2006 00:00:00	0	0	0	0	0	0	0	0	0	0	0	0	0.020833333
15/01/2006 01:00:00	0	0	0	0	0	0	0	0	0	0	0	0	0.020833333
15/01/2006 02:00:00	0	0	0	0	0	0	0	0	0	0	0	0	0.020833333
15/01/2006 03:00:00	0	0	0	0	0	0	0	0	0	0	0	0	0.020833333
15/01/2006 04:00:00	0	0	0	0	0	0	0	0	0	0	0	0	0.020833333
15/01/2006 05:00:00	0	0	0	0	0	0	0	0	0	0	0	0	0.020833333
15/01/2006 06:00:00	0	0	0	0	0	0	0	0	0	0	0	0	0.020833333
15/01/2006 07:00:00	0	0	0	0	0	0	0	0	0	0	0	0	0.020833333
15/01/2006 08:00:00	0	0	0	0	0	0	0	0	0	0	0	0	0.020833333
15/01/2006 09:00:00	0	0	0	0	0	0	0	0	0	0	0	0	0.020833333
15/01/2006 10:00:00	0	0	0	0	0	0	0	0	0	0	0	0	0.020833333
15/01/2006 11:00:00	0	0	0	0	0	0	0	0	0	0	0	0	0.020833333
15/01/2006 12:00:00	0	0	0	0	0	0	0	0	0	0	0	0	0.020833333
15/01/2006 13:00:00	0	0	0	0	0	0	0	0	0	0	0	0	0.020833333
15/01/2006 14:00:00	0	0	0	0	0	0	0	0	0	0	0	0	0.020833333
15/01/2006 15:00:00	0	0	0	0	0	0	0	0	0	0	0	0	0.020833333
15/01/2006 16:00:00	0	0	0	0	0	0	0	0	0	0	0	0	0.020833333
15/01/2006 17:00:00	0	0	0	0	0	0	0	0	0	0	0	0	0.020833333
15/01/2006 18:00:00	0	0	0	0	0	0	0	0	0	0	0	0	0.020833333
15/01/2006 19:00:00	0	0	0	0	0	0	0	0	0	0	0	0	0.020833333
15/01/2006 20:00:00	0	0	0	0	0	0	0	0	0	0	0	0	0.020833333
15/01/2006 21:00:00	0	0	0	0	0	0	0	0	0	0	0	0	0.020833333
15/01/2006 22:00:00	0	0	0	0	0	0	0	0	0	0	0	0	0.020833333
15/01/2006 23:00:00	0	0	0	0	0	0	0	0	0	0	0	0	0.020833333
16/01/2006 00:00:00	0.083333333	0.095833333	0.175	0.120833333	0.066666667	0.104166667	0.1375	0.25	0.354166667	0.3	0.233333333	0.175	0.233333333
16/01/2006 01:00:00	0.083333333	0.095833333	0.175	0.120833333	0.066666667	0.104166667	0.1375	0.25	0.354166667	0.3	0.233333333	0.175	0.233333333
16/01/2006 02:00:00	0.083333333	0.095833333	0.175	0.120833333	0.066666667	0.104166667	0.1375	0.25	0.354166667	0.3	0.233333333	0.175	0.233333333
16/01/2006 03:00:00	0.083333333	0.095833333	0.175	0.120833333	0.066666667	0.104166667	0.1375	0.25	0.354166667	0.3	0.233333333	0.175	0.233333333
16/01/2006 04:00:00	0.083333333	0.095833333	0.175	0.120833333	0.066666667	0.104166667	0.1375	0.25	0.354166667	0.3	0.233333333	0.175	0.233333333
16/01/2006 05:00:00	0.083333333	0.095833333	0.175	0.120833333	0.066666667	0.104166667	0.1375	0.25	0.354166667	0.3	0.233333333	0.175	0.233333333
16/01/2006 06:00:00	0.083333333	0.095833333	0.175	0.120833333	0.066666667	0.104166667	0.1375	0.25	0.354166667	0.3	0.233333333	0.175	0.233333333
16/01/2006 07:00:00	0.083333333	0.095833333	0.175	0.120833333	0.066666667	0.104166667	0.1375	0.25	0.354166667	0.3	0.233333333	0.175	0.233333333
16/01/2006 08:00:00	0.083333333	0.095833333	0.175	0.120833333	0.066666667	0.104166667	0.1375	0.25	0.354166667	0.3	0.233333333	0.175	0.233333333
16/01/2006 09:00:00	0.083333333	0.095833333	0.175	0.120833333	0.066666667	0.104166667	0.1375	0.25	0.354166667	0.3	0.233333333	0.175	0.233333333
16/01/2006 10:00:00	0.083333333	0.095833333	0.175	0.120833333	0.066666667	0.104166667	0.1375	0.25	0.354166667	0.3	0.233333333	0.175	0.233333333
16/01/2006 11:00:00	0.083333333	0.095833333	0.175	0.120833333	0.066666667	0.104166667	0.1375	0.25	0.354166667	0.3	0.233333333	0.175	0.233333333
16/01/2006 12:00:00	0.083333333	0.095833333	0.175	0.120833333	0.066666667	0.104166667	0.1375	0.25	0.354166667	0.3	0.233333333	0.175	0.233333333
16/01/2006 13:00:00	0.083333333	0.095833333	0.175	0.120833333	0.066666667	0.104166667	0.1375	0.25	0.354166667	0.3	0.233333333	0.175	0.233333333
16/01/2006 14:00:00	0.083333333	0.095833333	0.175	0.120833333	0.066666667	0.104166667	0.1375	0.25	0.354166667	0.3	0.233333333	0.175	0.233333333
16/01/2006 15:00:00	0.083333333	0.095833333	0.175	0.120833333	0.066666667	0.104166667	0.1375	0.25	0.354166667	0.3	0.233333333	0.175	0.233333333
16/01/2006 16:00:00	0.083333333	0.095833333	0.175	0.120833333	0.066666667	0.104166667	0.1375	0.25	0.354166667	0.3	0.233333333	0.175	0.233333333
16/01/2006 17:00:00	0.083333333	0.095833333	0.175	0.120833333	0.066666667	0.104166667	0.1375	0.25	0.354166667	0.3	0.233333333	0.175	0.233333333
16/01/2006 18:00:00	0.083333333	0.095833333	0.175	0.120833333	0.066666667	0.104166667	0.1375	0.25	0.354166667	0.3	0.233333333	0.175	0.233333333
16/01/2006 19:00:00	0.083333333	0.095833333	0.175	0.120833333	0.066666667	0.104166667	0.1375	0.25	0.354166667	0.3	0.233333333	0.175	0.233333333
16/01/2006 20:00:00	0.083333333	0.095833333	0.175	0.120833333	0.066666667	0.104166667	0.1375	0.25	0.354166667	0.3	0.233333333	0.175	0.233333333
16/01/2006 21:00:00	0.083333333	0.095833333	0.175	0.120833333	0.066666667	0.104166667	0.1375	0.25	0.354166667	0.3	0.233333333	0.175	0.233333333
16/01/2006 22:00:00	0.083333333	0.095833333	0.175	0.120833333	0.066666667	0.104166667	0.1375	0.25	0.354166667	0.3	0.233333333	0.175	0.233333333
16/01/2006 23:00:00	0.083333333	0.095833333	0.175	0.120833333	0.066666667	0.104166667	0.1375	0.25	0.354166667	0.3	0.233333333	0.175	0.233333333
17/01/2006 00:00:00	0.291666667	0.045833333	0.4375	0.125	0.233333333	0.195833333	0.379166667	0.425	0.5125	0.370833333	0.304166667	0.529166667	0.3
17/01/2006 01:00:00	0.291666667	0.045833333	0.4375	0.125	0.233333333	0.195833333	0.379166667	0.425	0.5125	0.370833333	0.304166667	0.529166667	0.3
17/01/2006 02:00:00	0.291666667	0.045833333	0.4375	0.125	0.233333333	0.195833333	0.379166667	0.425	0.5125	0.370833333	0.304166667	0.529166667	0.3
17/01/2006 03:00:00	0.291666667	0.045833333	0.4375	0.125	0.233333333	0.195833333	0.379166667	0.425	0.5125	0.370833333	0.304166667	0.529166667	0.3
17/01/2006 04:00:00	0.291666667	0.045833333	0.4375	0.125	0.233333333	0.195833333	0.379166667	0.425	0.5125	0.370833333	0.304166667	0.529166667	0.3
17/01/2006 05:00:00	0.291666667	0.045833333	0.4375	0.125	0.233333333	0.195833333	0.379166667	0.425	0.5125	0.370833333	0.304166667	0.529166667	0.3
17/01/2006 06:00:00	0.291666667	0.045833333	0.4375	0.125	0.233333333	0.195833333	0.379166667	0.425	0.5125	0.370833333	0.304166667	0.529166667	0.3
17/01/2006 07:00:00	0.291666667	0.045833333	0.4375	0.125	0.233333333	0.195833333	0.379166667	0.425	0.5125	0.370833333	0.304166667	0.529166667	0.3
17/01/2006 08:00:00	0.291666667	0.045833333	0.4375	0.125	0.233333333	0.195833333	0.379166667	0.425	0.5125	0.370833333	0.304166667	0.529166667	0.3
17/01/2006 09:00:00	0.291666667	0.045833333	0.4375	0.125	0.233333333	0.195833333	0.379166667	0.425	0.5125	0.370833333	0.304166667	0.529166667	0.3
17/01/2006 10:00:00	0.291666667	0.045833333	0.4375	0.125	0.233333333	0.195833333	0.379166667	0.425	0.5125	0.370833333	0.304166667	0.529166667	0.3
17/01/2006 11:00:00	0.291666667	0.045833333	0.4375	0.125	0.233333333	0.195833333	0.379166667	0.425	0.5125	0.370833333	0.304166667	0.529166667	0.3
17/01/2006 12:00:00	0.291666667	0.045833333	0.4375	0.125	0.233333333	0.195833333	0.379166667	0.425	0.5125	0.370833333	0.304166667	0.529166667	0.3
17/01/2006 13:00:00	0.291666667	0.045833333	0.4375	0.125	0.233333333	0.195833333	0.379166667	0.425	0.5125	0.370833333	0.304166667	0.529166667	0.3
17/01/2006 14:00:00	0.291666667	0.045833333	0.4375	0.125	0.233333333	0.195833333	0.379166667	0.425	0.5125	0.370833333	0.304166667	0.529166667	0.3
17/01/2006 15:00:00	0.291666667	0.045833333	0.4375	0.125	0.233333333	0.195833333	0.379166667	0.425	0.5125	0.370833333	0.304166667	0.529166667	0.3
17/01/2006 16:00:00	0.291666667	0.045833333	0.4375	0.125	0.233333333	0.195833333	0.379166667	0.425	0.5125	0.370833333	0.304166667	0.529166667	0.3
17/01/2006 17:00:00	0.291666667	0.045833333	0.4375	0.125	0.233333333	0.195833333	0.379166667	0.425	0.5125	0.370833333	0.304166667	0.529166667	0.3
17/01/2006 18:00:00	0.291666667	0.045833333	0.4375	0.125	0.233333333	0.195833333	0.379166667	0.425	0.5125	0.370833333	0.304166667	0.529166667	0.3
17/01/2006 19:00:00	0.291666667	0.045833333	0.4375	0.125	0.233333333	0.195833333	0.379166667	0.425	0.5125	0.370833333	0.304166667	0.529166667	0.3
17/01/2006 20:00:00	0.291666667	0.045833333	0.4375	0.125	0.233333333	0.195833333	0.379166667	0.425	0.5125	0.370833333	0.304166667	0.529166667	0.3
17/01/2006 21:00:00	0.291666667	0.045833333	0.4375	0.125	0.233333333	0.195833333	0.379166667	0.425	0.5125	0.370833333	0.304166667	0.529166667	0.3
17/01/2006 22:00:00	0.291666667	0.045833333	0.4375	0.125	0.233333333	0.195833333	0.379166667	0.425	0.5125	0.370833333	0.304166667	0.529166667	0.3
17/01/2006 23:00:00	0.291666667	0.045833333	0.4375	0.125	0.233333333	0.195833333	0.379166667	0.425	0.5125	0.370833333	0.304166667	0.529166667	0.3
18/01/2006 00:00:00	1.166666667	0.558333333	1.0625	0.679166667	0.929166667	0.75	0.925	1.095833333	1.120833333	0.9	0.795833333	0.895833333	1.3625
18/01/2006 01:00:00	1.166666667	0.558333333	1.0625	0.679166667	0.929166667	0.75	0.925	1.095833333	1.120833333	0.9	0.795833333	0.895833333	1.3625
18/01/2006 02:00:00	1.166666667	0.558333333	1.0625	0.679166667	0.929166667	0.75	0.925	1.095833333	1.120833333	0.9	0.795833333	0.895833333	1.3625
18/01/2006 03:00:00	1.166666667	0.558333333	1.0625	0.679166667	0.929166667	0.75	0.925	1.095833333	1.120833333	0.9	0.795833333	0.895833333	1.3625
18/01/2006 04:00:00	1.166666667	0.558333333	1.0625	0.679166667	0.929166667	0.75	0.925	1.095833333	1.120833333	0.9	0.795833333	0.895833333	1.3625
18/01/2006 05:00:00	1.166666667	0.558333333	1.0625	0.679166667	0.929166667	0.75	0.925	1.095833333	1.120833333	0.9	0.795833333	0.895833333	1.3625
18/01/2006 06:00:00	1.166666667	0.558333333	1.0625	0.679166667	0.929166667	0.75	0.925	1.095833333	1.120833333	0.9	0.795833333	0.895833333	1.3625
18/01/2006 07:00:00	1.166666667	0.558333333	1.0625	0.679166667	0.929166667	0.75	0.925	1.095833333	1.120833333	0.9	0.795833333	0.895833333	1.3625
18/01/2006 08:00:00	1.166666667	0.558333333	1.0625	0.679166667	0.929166667	0.75	0.925	1.095833333	1.120833333	0.9	0.795833333	0.895833333	1.3625
18/01/2006 09:00:00	1.166666667	0.558333333	1.0625	0.679166667	0.929166667	0.75	0.925	1.095833333	1.120833333	0.9	0.795833333	0.895833333	1.3625
18/01/2006 10:00:00	1.166666667	0.558333333	1.0625	0.679166667	0.929166667	0.75	0.925	1.095833333	1.120833333	0.9	0.795833333	0.895833333	1.3625
18/01/2006 11:00:00	1.166666667	0.558333333	1.0625	0.679166667	0.929166667	0.75	0.925	1.095833333	1.120833333	0.9	0.795833333	0.895833333	1.3625
18/01/2006 12:00:00	1.166666667	0.558333333	1.0625	0.679166667	0.929166667	0.75	0.925	1.095833333	1.120833333	0.9	0.795833333	0.895833333	1.3625
18/01/2006 13:00:00	1.166666667	0.558333333	1.0625	0.679166667	0.929166667	0.75	0.925	1.095833333	1.120833333	0.9	0.795833333	0.895833333	1.3625
18/01/2006 14:00:00	1.166666667	0.558333333	1.0625	0.679166667	0.929166667	0.75	0.925	1.095833333	1.120833333	0.9	0.795833333	0.895833333	1.3625
18/01/2006 15:00:00	1.166666667	0.558333333	1.0625	0.679166667	0.929166667	0.75	0.925	1.095833333	1.120833333	0.9	0.795833333	0.895833333	1.3625
18/01/2006 16:00:00	1.166666667	0.558333333	1.0625	0.679166667	0.929166667	0.75	0.925	1.095833333	1.120833333	0.9	0.795833333	0.895833333	1.3625
18/01/2006 17:00:00	1.166666667	0.558333333	1.0625	0.679166667	0.929166667	0.75	0.925	1.095833333	1.120833333	0.9	0.795833333	0.895833333	1.3625
18/01/2006 18:00:00	1.166666667	0.558333333	1.0625	0.679166667	0.929166667	0.75	0.925	1.095833333	1.120833333	0.9	0.795833333	0.895833333	1.3625
18/01/2006 19:00:00	1.166666667	0.558333333	1.0625	0.679166667	0.929166667	0.75	0.925	1.095833333	1.120833333	0.9	0.795833333	0.895833333	1.3625
18/01/2006 20:00:00	1.166666667	0.558333333	1.0625	0.679166667	0.929166667	0.75	0.925	1.095833333	1.120833333	0.9	0.795833333	0.895833333	1.3625
18/01/2006 21:00:00	1.166666667	0.558333333	1.0625	0.679166667	0.929166667	0.75	0.925	1.095833333	1.120833333	0.9	0.795833333	0.895833333	1.3625
18/01/2006 22:00:00	1.166666667	0.558333333	1.0625	0.679166667	0.929166667	0.75	0.925	1.095833333	1.120833333	0.9	0.795833333	0.895833333	1.3625
18/01/2006 23:00:00	1.166666667	0.558333333	1.0625	0.679166667	0.929166667	0.75	0.925	1.095833333	1.120833333	0.9	0.795833333	0.895833333	1.3625
19/01/2006 00:00:00	0.1625	0.016666667	0.05	0.083333333	0.229166667	0.175	0.2875	0.275	0.15	0.1	0.145833333	0.225	0.091666667
19/01/2006 01:00:00	0.1625	0.016666667	0.05	0.083333333	0.229166667	0.175	0.2875	0.275	0.15	0.1	0.145833333	0.225	0.091666667
19/01/2006 02:00:00	0.1625	0.016666667	0.05	0.083333333	0.229166667	0.175	0.2875	0.275	0.15	0.1	0.145833333	0.225	0.091666667
19/01/2006 03:00:00	0.1625	0.016666667	0.05	0.083333333	0.229166667	0.175	0.2875	0.275	0.15	0.1	0.145833333	0.225	0.091666667
19/01/2006 04:00:00	0.1625	0.016666667	0.05	0.083333333	0.229166667	0.175	0.2875	0.275	0.15	0.1	0.145833333	0.225	0.091666667
19/01/2006 05:00:00	0.1625	0.016666667	0.05	0.083333333	0.229166667	0.175	0.2875	0.275	0.15	0.1	0.145833333	0.225	0.091666667
19/01/2006 06:00:00	0.1625	0.016666667	0.05	0.083333333	0.229166667	0.175	0.2875	0.275	0.15	0.1	0.145833333	0.225	0.091666667
19/01/2006 07:00:00	0.1625	0.016666667	0.05	0.083333333	0.229166667	0.175	0.2875	0.275	0.15	0.1	0.145833333	0.225	0.091666667
19/01/2006 08:00:00	0.1625	0.016666667	0.05	0.083333333	0.229166667	0.175	0.2875	0.275	0.15	0.1	0.145833333	0.225	0.091666667
19/01/2006 09:00:00	0.1625	0.016666667	0.05	0.083333333	0.229166667	0.175	0.2875	0.275	0.15	0.1	0.145833333	0.225	0.091666667
19/01/2006 10:00:00	0.1625	0.016666667	0.05	0.083333333	0.229166667	0.175	0.2875	0.275	0.15	0.1	0.145833333	0.225	0.091666667
19/01/2006 11:00:00	0.1625	0.016666667	0.05	0.083333333	0.229166667	0.175	0.2875	0.275	0.15	0.1	0.145833333	0.225	0.091666667
19/01/2006 12:00:00	0.1625	0.016666667	0.05	0.083333333	0.229166667	0.175	0.2875	0.275	0.15	0.1	0.145833333	0.225	0.091666667
19/01/2006 13:00:00	0.1625	0.016666667	0.05	0.083333333	0.229166667	0.175	0.2875	0.275	0.15	0.1	0.145833333	0.225	0.091666667
19/01/2006 14:00:00	0.1625	0.016666667	0.05	0.083333333	0.229166667	0.175	0.2875	0.275	0.15	0.1	0.145833333	0.225	0.091666667
19/01/2006 15:00:00	0.1625	0.016666667	0.05	0.083333333	0.229166667	0.175	0.2875	0.275	0.15	0.1	0.145833333	0.225	0.091666667
19/01/2006 16:00:00	0.1625	0.016666667	0.05	0.083333333	0.229166667	0.175	0.2875	0.275	0.15	0.1	0.145833333	0.225	0.091666667
19/01/2006 17:00:00	0.1625	0.016666667	0.05	0.083333333	0.229166667	0.175	0.2875	0.275	0.15	0.1	0.145833333	0.225	0.091666667
19/01/2006 18:00:00	0.1625	0.016666667	0.05	0.083333333	0.229166667	0.175	0.2875	0.275	0.15	0.1	0.145833333	0.225	0.091666667
19/01/2006 19:00:00	0.1625	0.016666667	0.05	0.083333333	0.229166667	0.175	0.2875	0.275	0.15	0.1	0.145833333	0.225	0.091666667
19/01/2006 20:00:00	0.1625	0.016666667	0.05	0.083333333	0.229166667	0.175	0.2875	0.275	0.15	0.1	0.145833333	0.225	0.091666667
19/01/2006 21:00:00	0.1625	0.016666667	0.05	0.083333333	0.229166667	0.175	0.2875	0.275	0.15	0.1	0.145833333	0.225	0.091666667
19/01/2006 22:00:00	0.1625	0.016666667	0.05	0.083333333	0.229166667	0.175	0.2875	0.275	0.15	0.1	0.145833333	0.225	0.091666667
19/01/2006 23:00:00	0.1625	0.016666667	0.05	0.083333333	0.229166667	0.175	0.2875	0.275	0.15	0.1	0.145833333	0.225	0.091666667
20/01/2006 00:00:00	0	0	0	0	0	0	0.016666667	0	0.033333333	0.033333333	0.0625	0.0125	0.041666667
20/01/2006 01:00:00	0	0	0	0	0	0	0.016666667	0	0.033333333	0.033333333	0.0625	0.0125	0.041666667
20/01/2006 02:00:00	0	0	0	0	0	0	0.016666667	0	0.033333333	0.033333333	0.0625	0.0125	0.041666667
20/01/2006 03:00:00	0	0	0	0	0	0	0.016666667	0	0.033333333	0.033333333	0.0625	0.0125	0.041666667
20/01/2006 04:00:00	0	0	0	0	0	0	0.016666667	0	0.033333333	0.033333333	0.0625	0.0125	0.041666667
20/01/2006 05:00:00	0	0	0	0	0	0	0.016666667	0	0.033333333	0.033333333	0.0625	0.0125	0.041666667
20/01/2006 06:00:00	0	0	0	0	0	0	0.016666667	0	0.033333333	0.033333333	0.0625	0.0125	0.041666667
20/01/2006 07:00:00	0	0	0	0	0	0	0.016666667	0	0.033333333	0.033333333	0.0625	0.0125	0.041666667
20/01/2006 08:00:00	0	0	0	0	0	0	0.016666667	0	0.033333333	0.033333333	0.0625	0.0125	0.041666667
20/01/2006 09:00:00	0	0	0	0	0	0	0.016666667	0	0.033333333	0.033333333	0.0625	0.0125	0.041666667
20/01/2006 10:00:00	0	0	0	0	0	0	0.016666667	0	0.033333333	0.033333333	0.0625	0.0125	0.041666667
20/01/2006 11:00:00	0	0	0	0	0	0	0.016666667	0	0.033333333	0.033333333	0.0625	0.0125	0.041666667
20/01/2006 12:00:00	0	0	0	0	0	0	0.016666667	0	0.033333333	0.033333333	0.0625	0.0125	0.041666667
20/01/2006 13:00:00	0	0	0	0	0	0	0.016666667	0	0.033333333	0.033333333	0.0625	0.0125	0.041666667
20/01/2006 14:00:00	0	0	0	0	0	0	0.016666667	0	0.033333333	0.033333333	0.0625	0.0125	0.041666667
20/01/2006 15:00:00	0	0	0	0	0	0	0.016666667	0	0.033333333	0.033333333	0.0625	0.0125	0.041666667
20/01/2006 16:00:00	0	0	0	0	0	0	0.016666667	0	0.033333333	0.033333333	0.0625	0.0125	0.041666667
20/01/2006 17:00:00	0	0	0	0	0	0	0.016666667	0	0.033333333	0.033333333	0.0625	0.0125	0.041666667
20/01/2006 18:00:00	0	0	0	0	0	0	0.016666667	0	0.033333333	0.033333333	0.0625	0.0125	0.041666667
20/01/2006 19:00:00	0	0	0	0	0	0	0.016666667	0	0.033333333	0.033333333	0.0625	0.0125	0.041666667
20/01/2006 20:00:00	0	0	0	0	0	0	0.016666667	0	0.033333333	0.033333333	0.0625	0.0125	0.041666667
20/01/2006 21:00:00	0	0	0	0	0	0	0.016666667	0	0.033333333	0.033333333	0.0625	0.0125	0.041666667
20/01/2006 22:00:00	0	0	0	0	0	0	0.016666667	0	0.033333333	0.033333333	0.0625	0.0125	0.041666667
20/01/2006 23:00:00	0	0	0	0	0	0	0.016666667	0	0.033333333	0.033333333	0.0625	0.0125	0.041666667
21/01/2006 00:00:00	0	0	0	0	0	0	0	0	0	0	0	0	0
21/01/2006 01:00:00	0	0	0	0	0	0	0	0	0	0	0	0	0
21/01/2006 02:00:00	0	0	0	0	0	0	0	0	0	0	0	0	0
21/01/2006 03:00:00	0	0	0	0	0	0	0	0	0	0	0	0	0
21/01/2006 04:00:00	0	0	0	0	0	0	0	0	0	0	0	0	0
21/01/2006 05:00:00	0	0	0	0	0	0	0	0	0	0	0	0	0
21/01/2006 06:00:00	0	0	0	0	0	0	0	0	0	0	0	0	0
21/01/2006 07:00:00	0	0	0	0	0	0	0	0	0	0	0	0	0
21/01/2006 08:00:00	0	0	0	0	0	0	0	0	0	0	0	0	0
21/01/2006 09:00:00	0	0	0	0	0	0	0	0	0	0	0	0	0
21/01/2006 10:00:00	0	0	0	0	0	0	0	0	0	0	0	0	0
21/01/2006 11:00:00	0	0	0	0	0	0	0	0	0	0	0	0	0
21/01/2006 12:00:00	0	0	0	0	0	0	0	0	0	0	0	0	0
21/01/2006 13:00:00	0	0	0	0	0	0	0	0	0	0	0	0	0
21/01/2006 14:00:00	0	0	0	0	0	0	0	0	0	0	0	0	0
21/01/2006 15:00:00	0	0	0	0	0	0	0	0	0	0	0	0	0
21/01/2006 16:00:00	0	0	0	0	0	0	0	0	0	0	0	0	0
21/01/2006 17:00:00	0	0	0	0	0	0	0	0	0	0	0	0	0
21/01/2006 18:00:00	0	0	0	0	0	0	0	0	0	0	0	0	0
21/01/2006 19:00:00	0	0	0	0	0	0	0	0	0	0	0	0	0
21/01/2006 20:00:00	0	0	0	0	0	0	0	0	0	0	0	0	0
21/01/2006 21:00:00	0	0	0	0	0	0	0	0	0	0	0	0	0
21/01/2006 22:00:00	0	0	0	0	0	0	0	0	0	0	0	0	0
21/01/2006 23:00:00	0	0	0	0	0	0	0	0	0	0	0	0	0
22/01/2006 00:00:00	0	0	0	0	0	0	0	0	0	0	0	0	0
22/01/2006 01:00:00	0	0	0	0	0	0	0	0	0	0	0	0	0
22/01/2006 02:00:00	0	0	0	0	0	0	0	0	0	0	0	0	0
22/01/2006 03:00:00	0	0	0	0	0	0	0	0	0	0	0	0	0
22/01/2006 04:00:00	0	0	0	0	0	0	0	0	0	0	0	0	0
22/01/2006 05:00:00	0	0	0	0	0	0	0	0	0	0	0	0	0
22/01/2006 06:00:00	0	0	0	0	0	0	0	0	0	0	0	0	0
22/01/2006 07:00:00	0	0	0	0	0	0	0	0	0	0	0	0	0
22/01/2006 08:00:00	0	0	0	0	0	0	0	0	0	0	0	0	0
22/01/2006 09:00:00	0	0	0	0	0	0	0	0	0	0	0	0	0
22/01/2006 10:00:00	0	0	0	0	0	0	0	0	0	0	0	0	0
22/01/2006 11:00:00	0	0	0	0	0	0	0	0	0	0	0	0	0
22/01/2006 12:00:00	0	0	0	0	0	0	0	0	0	0	0	0	0
22/01/2006 13:00:00	0	0	0	0	0	0	0	0	0	0	0	0	0
22/01/2006 14:00:00	0	0	0	0	0	0	0	0	0	0	0	0	0
22/01/2006 15:00:00	0	0	0	0	0	0	0	0	0	0	0	0	0
22/01/2006 16:00:00	0	0	0	0	0	0	0	0	0	0	0	0	0
22/01/2006 17:00:00	0	0	0	0	0	0	0	0	0	0	0	0	0
22/01/2006 18:00:00	0	0	0	0	0	0	0	0	0	0	0	0	0
22/01/2006 19:00:00	0	0	0	0	0	0	0	0	0	0	0	0	0
22/01/2006 20:00:00	0	0	0	0	0	0	0	0	0	0	0	0	0
22/01/2006 21:00:00	0	0	0	0	0	0	0	0	0	0	0	0	0
22/01/2006 22:00:00	0	0	0	0	0	0	0	0	0	0	0	0	0
22/01/2006 23:00:00	0	0	0	0	0	0	0	0	0	0	0	0	0
23/01/2006 00:00:00	0	0	0	0	0	0	0	0	0	0	0	0	0
23/01/2006 01:00:00	0	0	0	0	0	0	0	0	0	0	0	0	0
23/01/2006 02:00:00	0	0	0	0	0	0	0	0	0	0	0	0	0
23/01/2006 03:00:00	0	0	0	0	0	0	0	0	0	0	0	0	0
23/01/2006 04:00:00	0	0	0	0	0	0	0	0	0	0	0	0	0
23/01/2006 05:00:00	0	0	0	0	0	0	0	0	0	0	0	0	0
23/01/2006 06:00:00	0	0	0	0	0	0	0	0	0	0	0	0	0
23/01/2006 07:00:00	0	0	0	0	0	0	0	0	0	0	0	0	0
23/01/2006 08:00:00	0	0	0	0	0	0	0	0	0	0	0	0	0
23/01/2006 09:00:00	0	0	0	0	0	0	0	0	0	0	0	0	0
23/01/2006 10:00:00	0	0	0	0	0	0	0	0	0	0	0	0	0
23/01/2006 11:00:00	0	0	0	0	0	0	0	0	0	0	0	0	0
23/01/2006 12:00:00	0	0	0	0	0	0	0	0	0	0	0	0	0
23/01/2006 13:00:00	0	0	0	0	0	0	0	0	0	0	0	0	0
23/01/2006 14:00:00	0	0	0	0	0	0	0	0	0	0	0	0	0
23/01/2006 15:00:00	0	0	0	0	0	0	0	0	0	0	0	0	0
23/01/2006 16:00:00	0	0	0	0	0	0	0	0	0	0	0	0	0
23/01/2006 17:00:00	0	0	0	0	0	0	0	0	0	0	0	0	0
23/01/2006 18:00:00	0	0	0	0	0	0	0	0	0	0	0	0	0
23/01/2006 19:00:00	0	0	0	0	0	0	0	0	0	0	0	0	0
23/01/2006 20:00:00	0	0	0	0	0	0	0	0	0	0	0	0	0
23/01/2006 21:00:00	0	0	0	0	0	0	0	0	0	0	0	0	0
23/01/2006 22:00:00	0	0	0	0	0	0	0	0	0	0	0	0	0
23/01/2006 23:00:00	0	0	0	0	0	0	0	0	0	0	0	0	0
24/01/2006 00:00:00	0	0	0	0	0	0	0	0	0	0	0	0	0
24/01/2006 01:00:00	0	0	0	0	0	0	0	0	0	0	0	0	0
24/01/2006 02:00:00	0	0	0	0	0	0	0	0	0	0	0	0	0
24/01/2006 03:00:00	0	0	0	0	0	0	0	0	0	0	0	0	0
24/01/2006 04:00:00	0	0	0	0	0	0	0	0	0	0	0	0	0
24/01/2006 05:00:00	0	0	0	0	0	0	0	0	0	0	0	0	0
24/01/2006 06:00:00	0	0	0	0	0	0	0	0	0	0	0	0	0
24/01/2006 07:00:00	0	0	0	0	0	0	0	0	0	0	0	0	0
24/01/2006 08:00:00	0	0	0	0	0	0	0	0	0	0	0	0	0
24/01/2006 09:00:00	0	0	0	0	0	0	0	0	0	0	0	0	0
24/01/2006 10:00:00	0	0	0	0	0	0	0	0	0	0	0	0	0
24/01/2006 11:00:00	0	0	0	0	0	0	0	0	0	0	0	0	0
24/01/2006 12:00:00	0	0	0	0	0	0	0	0	0	0	0	0	0
24/01/2006 13:00:00	0	0	0	0	0	0	0	0	0	0	0	0	0
24/01/2006 14:00:00	0	0	0	0	0	0	0	0	0	0	0	0	0
24/01/2006 15:00:00	0	0	0	0	0	0	0	0	0	0	0	0	0
24/01/2006 16:00:00	0	0	0	0	0	0	0	0	0	0	0	0	0
24/01/2006 17:00:00	0	0	0	0	0	0	0	0	0	0	0	0	0
24/01/2006 18:00:00	0	0	0	0	0	0	0	0	0	0	0	0	0
24/01/2006 19:00:00	0	0	0	0	0	0	0	0	0	0	0	0	0
24/01/2006 20:00:00	0	0	0	0	0	0	0	0	0	0	0	0	0
24/01/2006 21:00:00	0	0	0	0	0	0	0	0	0	0	0	0	0
24/01/2006 22:00:00	0	0	0	0	0	0	0	0	0	0	0	0	0
24/01/2006 23:00:00	0	0	0	0	0	0	0	0	0	0	0	0	0
25/01/2006 00:00:00	0	0	0	0	0	0	0	0	0	0	0	0	0
25/01/2006 01:00:00	0	0	0	0	0	0	0	0	0	0	0	0	0
25/01/2006 02:00:00	0	0	0	0	0	0	0	0	0	0	0	0	0
25/01/2006 03:00:00	0	0	0	0	0	0	0	0	0	0	0	0	0
25/01/2006 04:00:00	0	0	0	0	0	0	0	0	0	0	0	0	0
25/01/2006 05:00:00	0	0	0	0	0	0	0	0	0	0	0	0	0
25/01/2006 06:00:00	0	0	0	0	0	0	0	0	0	0	0	0	0
25/01/2006 07:00:00	0	0	0	0	0	0	0	0	0	0	0	0	0
25/01/2006 08:00:00	0	0	0	0	0	0	0	0	0	0	0	0	0
25/01/2006 09:00:00	0	0	0	0	0	0	0	0	0	0	0	0	0
25/01/2006 10:00:00	0	0	0	0	0	0	0	0	0	0	0	0	0
25/01/2006 11:00:00	0	0	0	0	0	0	0	0	0	0	0	0	0
25/01/2006 12:00:00	0	0	0	0	0	0	0	0	0	0	0	0	0
25/01/2006 13:00:00	0	0	0	0	0	0	0	0	0	0	0	0	0
25/01/2006 14:00:00	0	0	0	0	0	0	0	0	0	0	0	0	0
25/01/2006 15:00:00	0	0	0	0	0	0	0	0	0	0	0	0	0
25/01/2006 16:00:00	0	0	0	0	0	0	0	0	0	0	0	0	0
25/01/2006 17:00:00	0	0	0	0	0	0	0	0	0	0	0	0	0
25/01/2006 18:00:00	0	0	0	0	0	0	0	0	0	0	0	0	0
25/01/2006 19:00:00	0	0	0	0	0	0	0	0	0	0	0	0	0
25/01/2006 20:00:00	0	0	0	0	0	0	0	0	0	0	0	0	0
25/01/2006 21:00:00	0	0	0	0	0	0	0	0	0	0	0	0	0
25/01/2006 22:00:00	0	0	0	0	0	0	0	0	0	0	0	0	0
25/01/2006 23:00:00	0	0	0	0	0	0	0	0	0	0	0	0	0
26/01/2006 00:00:00	0	0	0	0	0	0	0	0	0	0	0	0	0
26/01/2006 01:00:00	0	0	0	0	0	0	0	0	0	0	0	0	0
26/01/2006 02:00:00	0	0	0	0	0	0	0	0	0	0	0	0	0
26/01/2006 03:00:00	0	0	0	0	0	0	0	0	0	0	0	0	0
26/01/2006 04:00:00	0	0	0	0	0	0	0	0	0	0	0	0	0
26/01/2006 05:00:00	0	0	0	0	0	0	0	0	0	0	0	0	0
26/01/2006 06:00:00	0	0	0	0	0	0	0	0	0	0	0	0	0
26/01/2006 07:00:00	0	0	0	0	0	0	0	0	0	0	0	0	0
26/01/2006 08:00:00	0	0	0	0	0	0	0	0	0	0	0	0	0
26/01/2006 09:00:00	0	0	0	0	0	0	0	0	0	0	0	0	0
26/01/2006 10:00:00	0	0	0	0	0	0	0	0	0	0	0	0	0
26/01/2006 11:00:00	0	0	0	0	0	0	0	0	0	0	0	0	0
26/01/2006 12:00:00	0	0	0	0	0	0	0	0	0	0	0	0	0
26/01/2006 13:00:00	0	0	0	0	0	0	0	0	0	0	0	0	0
26/01/2006 14:00:00	0	0	0	0	0	0	0	0	0	0	0	0	0
26/01/2006 15:00:00	0	0	0	0	0	0	0	0	0	0	0	0	0
26/01/2006 16:00:00	0	0	0	0	0	0	0	0	0	0	0	0	0
26/01/2006 17:00:00	0	0	0	0	0	0	0	0	0	0	0	0	0
26/01/2006 18:00:00	0	0	0	0	0	0	0	0	0	0	0	0	0
26/01/2006 19:00:00	0	0	0	0	0	0	0	0	0	0	0	0	0
26/01/2006 20:00:00	0	0	0	0	0	0	0	0	0	0	0	0	0
26/01/2006 21:00:00	0	0	0	0	0	0	0	0	0	0	0	0	0
26/01/2006 22:00:00	0	0	0	0	0	0	0	0	0	0	0	0	0
26/01/2006 23:00:00	0	0	0	0	0	0	0	0	0	0	0	0	0
27/01/2006 00:00:00	0	0	0	0	0	0	0	0	0	0	0	0	0
27/01/2006 01:00:00	0	0	0	0	0	0	0	0	0	0	0	0	0
27/01/2006 02:00:00	0	0	0	0	0	0	0	0	0	0	0	0	0
27/01/2006 03:00:00	0	0	0	0	0	0	0	0	0	0	0	0	0
27/01/2006 04:00:00	0	0	0	0	0	0	0	0	0	0	0	0	0
27/01/2006 05:00:00	0	0	0	0	0	0	0	0	0	0	0	0	0
27/01/2006 06:00:00	0	0	0	0	0	0	0	0	0	0	0	0	0
27/01/2006 07:00:00	0	0	0	0	0	0	0	0	0	0	0	0	0
27/01/2006 08:00:00	0	0	0	0	0	0	0	0	0	0	0	0	0
27/01/2006 09:00:00	0	0	0	0	0	0	0	0	0	0	0	0	0
27/01/2006 10:00:00	0	0	0	0	0	0	0	0	0	0	0	0	0
27/01/2006 11:00:00	0	0	0	0	0	0	0	0	0	0	0	0	0
27/01/2006 12:00:00	0	0	0	0	0	0	0	0	0	0	0	0	0
27/01/2006 13:00:00	0	0	0	0	0	0	0	0	0	0	0	0	0
27/01/2006 14:00:00	0	0	0	0	0	0	0	0	0	0	0	0	0
27/01/2006 15:00:00	0	0	0	0	0	0	0	0	0	0	0	0	0
27/01/2006 16:00:00	0	0	0	0	0	0	0	0	0	0	0	0	0
27/01/2006 17:00:00	0	0	0	0	0	0	0	0	0	0	0	0	0
27/01/2006 18:00:00	0	0	0	0	0	0	0	0	0	0	0	0	0
27/01/2006 19:00:00	0	0	0	0	0	0	0	0	0	0	0	0	0
27/01/2006 20:00:00	0	0	0	0	0	0	0	0	0	0	0	0	0
27/01/2006 21:00:00	0	0	0	0	0	0	0	0	0	0	0	0	0
27/01/2006 22:00:00	0	0	0	0	0	0	0	0	0	0	0	0	0
27/01/2006 23:00:00	0	0	0	0	0	0	0	0	0	0	0	0	0
28/01/2006 00:00:00	0	0	0	0	0	0	0	0	0	0	0	0	0
28/01/2006 01:00:00	0	0	0	0	0	0	0	0	0	0	0	0	0
28/01/2006 02:00:00	0	0	0	0	0	0	0	0	0	0	0	0	0
28/01/2006 03:00:00	0	0	0	0	0	0	0	0	0	0	0	0	0
28/01/2006 04:00:00	0	0	0	0	0	0	0	0	0	0	0	0	0
28/01/2006 05:00:00	0	0	0	0	0	0	0	0	0	0	0	0	0
28/01/2006 06:00:00	0	0	0	0	0	0	0	0	0	0	0	0	0
28/01/2006 07:00:00	0	0	0	0	0	0	0	0	0	0	0	0	0
28/01/2006 08:00:00	0	0	0	0	0	0	0	0	0	0	0	0	0
28/01/2006 09:00:00	0	0	0	0	0	0	0	0	0	0	0	0	0
28/01/2006 10:00:00	0	0	0	0	0	0	0	0	0	0	0	0	0
28/01/2006 11:00:00	0	0	0	0	0	0	0	0	0	0	0	0	0
28/01/2006 12:00:00	0	0	0	0	0	0	0	0	0	0	0	0	0
28/01/2006 13:00:00	0	0	0	0	0	0	0	0	0	0	0	0	0
28/01/2006 14:00:00	0	0	0	0	0	0	0	0	0	0	0	0	0
28/01/2006 15:00:00	0	0	0	0	0	0	0	0	0	0	0	0	0
28/01/2006 16:00:00	0	0	0	0	0	0	0	0	0	0	0	0	0
28/01/2006 17:00:00	0	0	0	0	0	0	0	0	0	0	0	0	0
28/01/2006 18:00:00	0	0	0	0	0	0	0	0	0	0	0	0	0
28/01/2006 19:00:00	0	0	0	0	0	0	0	0	0	0	0	0	0
28/01/2006 20:00:00	0	0	0	0	0	0	0	0	0	0	0	0	0
28/01/2006 21:00:00	0	0	0	0	0	0	0	0	0	0	0	0	0
28/01/2006 22:00:00	0	0	0	0	0	0	0	0	0	0	0	0	0
28/01/2006 23:00:00	0	0	0	0	0	0	0	0	0	0	0	0	0
29/01/2006 00:00:00	0	0	0	0	0	0	0.008333333	0.016666667	0.020833333	0.008333333	0.004166667	0	0.029166667
29/01/2006 01:00:00	0	0	0	0	0	0	0.008333333	0.016666667	0.020833333	0.008333333	0.004166667	0	0.029166667
29/01/2006 02:00:00	0	0	0	0	0	0	0.008333333	0.016666667	0.020833333	0.008333333	0.004166667	0	0.029166667
29/01/2006 03:00:00	0	0	0	0	0	0	0.008333333	0.016666667	0.020833333	0.008333333	0.004166667	0	0.029166667
29/01/2006 04:00:00	0	0	0	0	0	0	0.008333333	0.016666667	0.020833333	0.008333333	0.004166667	0	0.029166667
29/01/2006 05:00:00	0	0	0	0	0	0	0.008333333	0.016666667	0.020833333	0.008333333	0.004166667	0	0.029166667
29/01/2006 06:00:00	0	0	0	0	0	0	0.008333333	0.016666667	0.020833333	0.008333333	0.004166667	0	0.029166667
29/01/2006 07:00:00	0	0	0	0	0	0	0.008333333	0.016666667	0.020833333	0.008333333	0.004166667	0	0.029166667
29/01/2006 08:00:00	0	0	0	0	0	0	0.008333333	0.016666667	0.020833333	0.008333333	0.004166667	0	0.029166667
29/01/2006 09:00:00	0	0	0	0	0	0	0.008333333	0.016666667	0.020833333	0.008333333	0.004166667	0	0.029166667
29/01/2006 10:00:00	0	0	0	0	0	0	0.008333333	0.016666667	0.020833333	0.008333333	0.004166667	0	0.029166667
29/01/2006 11:00:00	0	0	0	0	0	0	0.008333333	0.016666667	0.020833333	0.008333333	0.004166667	0	0.029166667
29/01/2006 12:00:00	0	0	0	0	0	0	0.008333333	0.016666667	0.020833333	0.008333333	0.004166667	0	0.029166667
29/01/2006 13:00:00	0	0	0	0	0	0	0.008333333	0.016666667	0.020833333	0.008333333	0.004166667	0	0.029166667
29/01/2006 14:00:00	0	0	0	0	0	0	0.008333333	0.016666667	0.020833333	0.008333333	0.004166667	0	0.029166667
29/01/2006 15:00:00	0	0	0	0	0	0	0.008333333	0.016666667	0.020833333	0.008333333	0.004166667	0	0.029166667
29/01/2006 16:00:00	0	0	0	0	0	0	0.008333333	0.016666667	0.020833333	0.008333333	0.004166667	0	0.029166667
29/01/2006 17:00:00	0	0	0	0	0	0	0.008333333	0.016666667	0.020833333	0.008333333	0.004166667	0	0.029166667
29/01/2006 18:00:00	0	0	0	0	0	0	0.008333333	0.016666667	0.020833333	0.008333333	0.004166667	0	0.029166667
29/01/2006 19:00:00	0	0	0	0	0	0	0.008333333	0.016666667	0.020833333	0.008333333	0.004166667	0	0.029166667
29/01/2006 20:00:00	0	0	0	0	0	0	0.008333333	0.016666667	0.020833333	0.008333333	0.004166667	0	0.029166667
29/01/2006 21:00:00	0	0	0	0	0	0	0.008333333	0.016666667	0.020833333	0.008333333	0.004166667	0	0.029166667
29/01/2006 22:00:00	0	0	0	0	0	0	0.008333333	0.016666667	0.020833333	0.008333333	0.004166667	0	0.029166667
29/01/2006 23:00:00	0	0	0	0	0	0	0.008333333	0.016666667	0.020833333	0.008333333	0.004166667	0	0.029166667
30/01/2006 00:00:00	0.0375	0.033333333	0.083333333	0.025	0.004166667	0.008333333	0.045833333	0.008333333	0.020833333	0.016666667	0.020833333	0.016666667	0.070833333
30/01/2006 01:00:00	0.0375	0.033333333	0.083333333	0.025	0.004166667	0.008333333	0.045833333	0.008333333	0.020833333	0.016666667	0.020833333	0.016666667	0.070833333
30/01/2006 02:00:00	0.0375	0.033333333	0.083333333	0.025	0.004166667	0.008333333	0.045833333	0.008333333	0.020833333	0.016666667	0.020833333	0.016666667	0.070833333
30/01/2006 03:00:00	0.0375	0.033333333	0.083333333	0.025	0.004166667	0.008333333	0.045833333	0.008333333	0.020833333	0.016666667	0.020833333	0.016666667	0.070833333
30/01/2006 04:00:00	0.0375	0.033333333	0.083333333	0.025	0.004166667	0.008333333	0.045833333	0.008333333	0.020833333	0.016666667	0.020833333	0.016666667	0.070833333
30/01/2006 05:00:00	0.0375	0.033333333	0.083333333	0.025	0.004166667	0.008333333	0.045833333	0.008333333	0.020833333	0.016666667	0.020833333	0.016666667	0.070833333
30/01/2006 06:00:00	0.0375	0.033333333	0.083333333	0.025	0.004166667	0.008333333	0.045833333	0.008333333	0.020833333	0.016666667	0.020833333	0.016666667	0.070833333
30/01/2006 07:00:00	0.0375	0.033333333	0.083333333	0.025	0.004166667	0.008333333	0.045833333	0.008333333	0.020833333	0.016666667	0.020833333	0.016666667	0.070833333
30/01/2006 08:00:00	0.0375	0.033333333	0.083333333	0.025	0.004166667	0.008333333	0.045833333	0.008333333	0.020833333	0.016666667	0.020833333	0.016666667	0.070833333
30/01/2006 09:00:00	0.0375	0.033333333	0.083333333	0.025	0.004166667	0.008333333	0.045833333	0.008333333	0.020833333	0.016666667	0.020833333	0.016666667	0.070833333
30/01/2006 10:00:00	0.0375	0.033333333	0.083333333	0.025	0.004166667	0.008333333	0.045833333	0.008333333	0.020833333	0.016666667	0.020833333	0.016666667	0.070833333
30/01/2006 11:00:00	0.0375	0.033333333	0.083333333	0.025	0.004166667	0.008333333	0.045833333	0.008333333	0.020833333	0.016666667	0.020833333	0.016666667	0.070833333
30/01/2006 12:00:00	0.0375	0.033333333	0.083333333	0.025	0.004166667	0.008333333	0.045833333	0.008333333	0.020833333	0.016666667	0.020833333	0.016666667	0.070833333
30/01/2006 13:00:00	0.0375	0.033333333	0.083333333	0.025	0.004166667	0.008333333	0.045833333	0.008333333	0.020833333	0.016666667	0.020833333	0.016666667	0.070833333
30/01/2006 14:00:00	0.0375	0.033333333	0.083333333	0.025	0.004166667	0.008333333	0.045833333	0.008333333	0.020833333	0.016666667	0.020833333	0.016666667	0.070833333
30/01/2006 15:00:00	0.0375	0.033333333	0.083333333	0.025	0.004166667	0.008333333	0.045833333	0.008333333	0.020833333	0.016666667	0.020833333	0.016666667	0.070833333
30/01/2006 16:00:00	0.0375	0.033333333	0.083333333	0.025	0.004166667	0.008333333	0.045833333	0.008333333	0.020833333	0.016666667	0.020833333	0.016666667	0.070833333
30/01/2006 17:00:00	0.0375	0.033333333	0.083333333	0.025	0.004166667	0.008333333	0.045833333	0.008333333	0.020833333	0.016666667	0.020833333	0.016666667	0.070833333
30/01/2006 18:00:00	0.0375	0.033333333	0.083333333	0.025	0.004166667	0.008333333	0.045833333	0.008333333	0.020833333	0.016666667	0.020833333	0.016666667	0.070833333
30/01/2006 19:00:00	0.0375	0.033333333	0.083333333	0.025	0.004166667	0.008333333	0.045833333	0.008333333	0.020833333	0.016666667	0.020833333	0.016666667	0.070833333
30/01/2006 20:00:00	0.0375	0.033333333	0.083333333	0.025	0.004166667	0.008333333	0.045833333	0.008333333	0.020833333	0.016666667	0.020833333	0.016666667	0.070833333
30/01/2006 21:00:00	0.0375	0.033333333	0.083333333	0.025	0.004166667	0.008333333	0.045833333	0.008333333	0.020833333	0.016666667	0.020833333	0.016666667	0.070833333
30/01/2006 22:00:00	0.0375	0.033333333	0.083333333	0.025	0.004166667	0.008333333	0.045833333	0.008333333	0.020833333	0.016666667	0.020833333	0.016666667	0.070833333
30/01/2006 23:00:00	0.0375	0.033333333	0.083333333	0.025	0.004166667	0.008333333	0.045833333	0.008333333	0.020833333	0.016666667	0.020833333	0.016666667	0.070833333
31/01/2006 00:00:00	0	0	0	0	0	0	0	0	0	0	0	0	0
31/01/2006 01:00:00	0	0	0	0	0	0	0	0	0	0	0	0	0
31/01/2006 02:00:00	0	0	0	0	0	0	0	0	0	0	0	0	0
31/01/2006 03:00:00	0	0	0	0	0	0	0	0	0	0	0	0	0
31/01/2006 04:00:00	0	0	0	0	0	0	0	0	0	0	0	0	0
31/01/2006 05:00:00	0	0	0	0	0	0	0	0	0	0	0	0	0
31/01/2006 06:00:00	0	0	0	0	0	0	0	0	0	0	0	0	0
31/01/2006 07:00:00	0	0	0	0	0	0	0	0	0	0	0	0	0
31/01/2006 08:00:00	0	0	0	0	0	0	0	0	0	0	0	0	0
31/01/2006 09:00:00	0	0	0	0	0	0	0	0	0	0	0	0	0
31/01/2006 10:00:00	0	0	0	0	0	0	0	0	0	0	0	0	0
31/01/2006 11:00:00	0	0	0	0	0	0	0	0	0	0	0	0	0
31/01/2006 12:00:00	0	0	0	0	0	0	0	0	0	0	0	0	0
31/01/2006 13:00:00	0	0	0	0	0	0	0	0	0	0	0	0	0
31/01/2006 14:00:00	0	0	0	0	0	0	0	0	0	0	0	0	0
31/01/2006 15:00:00	0	0	0	0	0	0	0	0	0	0	0	0	0
31/01/2006 16:00:00	0	0	0	0	0	0	0	0	0	0	0	0	0
31/01/2006 17:00:00	0	0	0	0	0	0	0	0	0	0	0	0	0
31/01/2006 18:00:00	0	0	0	0	0	0	0	0	0	0	0	0	0
31/01/2006 19:00:00	0	0	0	0	0	0	0	0	0	0	0	0	0
31/01/2006 20:00:00	0	0	0	0	0	0	0	0	0	0	0	0	0
31/01/2006 21:00:00	0	0	0	0	0	0	0	0	0	0	0	0	0
31/01/2006 22:00:00	0	0	0	0	0	0	0	0	0	0	0	0	0
31/01/2006 23:00:00	0	0	0	0	0	0	0	0	0	0	0	0	0
01/02/2006 00:00:00	0.05	0.045833333	0.033333333	0.020833333	0.008333333	0.15	0.025	0.016666667	0.008333333	0.008333333	0.016666667	0.029166667	0.008333333
01/02/2006 01:00:00	0.05	0.045833333	0.033333333	0.020833333	0.008333333	0.15	0.025	0.016666667	0.008333333	0.008333333	0.016666667	0.029166667	0.008333333
01/02/2006 02:00:00	0.05	0.045833333	0.033333333	0.020833333	0.008333333	0.15	0.025	0.016666667	0.008333333	0.008333333	0.016666667	0.029166667	0.008333333
01/02/2006 03:00:00	0.05	0.045833333	0.033333333	0.020833333	0.008333333	0.15	0.025	0.016666667	0.008333333	0.008333333	0.016666667	0.029166667	0.008333333
01/02/2006 04:00:00	0.05	0.045833333	0.033333333	0.020833333	0.008333333	0.15	0.025	0.016666667	0.008333333	0.008333333	0.016666667	0.029166667	0.008333333
01/02/2006 05:00:00	0.05	0.045833333	0.033333333	0.020833333	0.008333333	0.15	0.025	0.016666667	0.008333333	0.008333333	0.016666667	0.029166667	0.008333333
01/02/2006 06:00:00	0.05	0.045833333	0.033333333	0.020833333	0.008333333	0.15	0.025	0.016666667	0.008333333	0.008333333	0.016666667	0.029166667	0.008333333
01/02/2006 07:00:00	0.05	0.045833333	0.033333333	0.020833333	0.008333333	0.15	0.025	0.016666667	0.008333333	0.008333333	0.016666667	0.029166667	0.008333333
01/02/2006 08:00:00	0.05	0.045833333	0.033333333	0.020833333	0.008333333	0.15	0.025	0.016666667	0.008333333	0.008333333	0.016666667	0.029166667	0.008333333
01/02/2006 09:00:00	0.05	0.045833333	0.033333333	0.020833333	0.008333333	0.15	0.025	0.016666667	0.008333333	0.008333333	0.016666667	0.029166667	0.008333333
01/02/2006 10:00:00	0.05	0.045833333	0.033333333	0.020833333	0.008333333	0.15	0.025	0.016666667	0.008333333	0.008333333	0.016666667	0.029166667	0.008333333
01/02/2006 11:00:00	0.05	0.045833333	0.033333333	0.020833333	0.008333333	0.15	0.025	0.016666667	0.008333333	0.008333333	0.016666667	0.029166667	0.008333333
01/02/2006 12:00:00	0.05	0.045833333	0.033333333	0.020833333	0.008333333	0.15	0.025	0.016666667	0.008333333	0.008333333	0.016666667	0.029166667	0.008333333
01/02/2006 13:00:00	0.05	0.045833333	0.033333333	0.020833333	0.008333333	0.15	0.025	0.016666667	0.008333333	0.008333333	0.016666667	0.029166667	0.008333333
01/02/2006 14:00:00	0.05	0.045833333	0.033333333	0.020833333	0.008333333	0.15	0.025	0.016666667	0.008333333	0.008333333	0.016666667	0.029166667	0.008333333
01/02/2006 15:00:00	0.05	0.045833333	0.033333333	0.020833333	0.008333333	0.15	0.025	0.016666667	0.008333333	0.008333333	0.016666667	0.029166667	0.008333333
01/02/2006 16:00:00	0.05	0.045833333	0.033333333	0.020833333	0.008333333	0.15	0.025	0.016666667	0.008333333	0.008333333	0.016666667	0.029166667	0.008333333
01/02/2006 17:00:00	0.05	0.045833333	0.033333333	0.020833333	0.008333333	0.15	0.025	0.016666667	0.008333333	0.008333333	0.016666667	0.029166667	0.008333333
01/02/2006 18:00:00	0.05	0.045833333	0.033333333	0.020833333	0.008333333	0.15	0.025	0.016666667	0.008333333	0.008333333	0.016666667	0.029166667	0.008333333
01/02/2006 19:00:00	0.05	0.045833333	0.033333333	0.020833333	0.008333333	0.15	0.025	0.016666667	0.008333333	0.008333333	0.016666667	0.029166667	0.008333333
01/02/2006 20:00:00	0.05	0.045833333	0.033333333	0.020833333	0.008333333	0.15	0.025	0.016666667	0.008333333	0.008333333	0.016666667	0.029166667	0.008333333
01/02/2006 21:00:00	0.05	0.045833333	0.033333333	0.020833333	0.008333333	0.15	0.025	0.016666667	0.008333333	0.008333333	0.016666667	0.029166667	0.008333333
01/02/2006 22:00:00	0.05	0.045833333	0.033333333	0.020833333	0.008333333	0.15	0.025	0.016666667	0.008333333	0.008333333	0.016666667	0.029166667	0.008333333
01/02/2006 23:00:00	0.05	0.045833333	0.033333333	0.020833333	0.008333333	0.15	0.025	0.016666667	0.008333333	0.008333333	0.016666667	0.029166667	0.008333333
02/02/2006 00:00:00	0.0625	0.025	0.108333333	0.0625	0.1125	0.075	0.225	0.166666667	0.304166667	0.275	0.183333333	0.220833333	0.354166667
02/02/2006 01:00:00	0.0625	0.025	0.108333333	0.0625	0.1125	0.075	0.225	0.166666667	0.304166667	0.275	0.183333333	0.220833333	0.354166667
02/02/2006 02:00:00	0.0625	0.025	0.108333333	0.0625	0.1125	0.075	0.225	0.166666667	0.304166667	0.275	0.183333333	0.220833333	0.354166667
02/02/2006 03:00:00	0.0625	0.025	0.108333333	0.0625	0.1125	0.075	0.225	0.166666667	0.304166667	0.275	0.183333333	0.220833333	0.354166667
02/02/2006 04:00:00	0.0625	0.025	0.108333333	0.0625	0.1125	0.075	0.225	0.166666667	0.304166667	0.275	0.183333333	0.220833333	0.354166667
02/02/2006 05:00:00	0.0625	0.025	0.108333333	0.0625	0.1125	0.075	0.225	0.166666667	0.304166667	0.275	0.183333333	0.220833333	0.354166667
02/02/2006 06:00:00	0.0625	0.025	0.108333333	0.0625	0.1125	0.075	0.225	0.166666667	0.304166667	0.275	0.183333333	0.220833333	0.354166667
02/02/2006 07:00:00	0.0625	0.025	0.108333333	0.0625	0.1125	0.075	0.225	0.166666667	0.304166667	0.275	0.183333333	0.220833333	0.354166667
02/02/2006 08:00:00	0.0625	0.025	0.108333333	0.0625	0.1125	0.075	0.225	0.166666667	0.304166667	0.275	0.183333333	0.220833333	0.354166667
02/02/2006 09:00:00	0.0625	0.025	0.108333333	0.0625	0.1125	0.075	0.225	0.166666667	0.304166667	0.275	0.183333333	0.220833333	0.354166667
02/02/2006 10:00:00	0.0625	0.025	0.108333333	0.0625	0.1125	0.075	0.225	0.166666667	0.304166667	0.275	0.183333333	0.220833333	0.354166667
02/02/2006 11:00:00	0.0625	0.025	0.108333333	0.0625	0.1125	0.075	0.225	0.166666667	0.304166667	0.275	0.183333333	0.220833333	0.354166667
02/02/2006 12:00:00	0.0625	0.025	0.108333333	0.0625	0.1125	0.075	0.225	0.166666667	0.304166667	0.275	0.183333333	0.220833333	0.354166667
02/02/2006 13:00:00	0.0625	0.025	0.108333333	0.0625	0.1125	0.075	0.225	0.166666667	0.304166667	0.275	0.183333333	0.220833333	0.354166667
02/02/2006 14:00:00	0.0625	0.025	0.108333333	0.0625	0.1125	0.075	0.225	0.166666667	0.304166667	0.275	0.183333333	0.220833333	0.354166667
02/02/2006 15:00:00	0.0625	0.025	0.108333333	0.0625	0.1125	0.075	0.225	0.166666667	0.304166667	0.275	0.183333333	0.220833333	0.354166667
02/02/2006 16:00:00	0.0625	0.025	0.108333333	0.0625	0.1125	0.075	0.225	0.166666667	0.304166667	0.275	0.183333333	0.220833333	0.354166667
02/02/2006 17:00:00	0.0625	0.025	0.108333333	0.0625	0.1125	0.075	0.225	0.166666667	0.304166667	0.275	0.183333333	0.220833333	0.354166667
02/02/2006 18:00:00	0.0625	0.025	0.108333333	0.0625	0.1125	0.075	0.225	0.166666667	0.304166667	0.275	0.183333333	0.220833333	0.354166667
02/02/2006 19:00:00	0.0625	0.025	0.108333333	0.0625	0.1125	0.075	0.225	0.166666667	0.304166667	0.275	0.183333333	0.220833333	0.354166667
02/02/2006 20:00:00	0.0625	0.025	0.108333333	0.0625	0.1125	0.075	0.225	0.166666667	0.304166667	0.275	0.183333333	0.220833333	0.354166667
02/02/2006 21:00:00	0.0625	0.025	0.108333333	0.0625	0.1125	0.075	0.225	0.166666667	0.304166667	0.275	0.183333333	0.220833333	0.354166667
02/02/2006 22:00:00	0.0625	0.025	0.108333333	0.0625	0.1125	0.075	0.225	0.166666667	0.304166667	0.275	0.183333333	0.220833333	0.354166667
02/02/2006 23:00:00	0.0625	0.025	0.108333333	0.0625	0.1125	0.075	0.225	0.166666667	0.304166667	0.275	0.183333333	0.220833333	0.354166667
03/02/2006 00:00:00	0	0	0	0	0	0	0	0	0	0	0	0	0
03/02/2006 01:00:00	0	0	0	0	0	0	0	0	0	0	0	0	0
03/02/2006 02:00:00	0	0	0	0	0	0	0	0	0	0	0	0	0
03/02/2006 03:00:00	0	0	0	0	0	0	0	0	0	0	0	0	0
03/02/2006 04:00:00	0	0	0	0	0	0	0	0	0	0	0	0	0
03/02/2006 05:00:00	0	0	0	0	0	0	0	0	0	0	0	0	0
03/02/2006 06:00:00	0	0	0	0	0	0	0	0	0	0	0	0	0
03/02/2006 07:00:00	0	0	0	0	0	0	0	0	0	0	0	0	0
03/02/2006 08:00:00	0	0	0	0	0	0	0	0	0	0	0	0	0
03/02/2006 09:00:00	0	0	0	0	0	0	0	0	0	0	0	0	0
03/02/2006 10:00:00	0	0	0	0	0	0	0	0	0	0	0	0	0
03/02/2006 11:00:00	0	0	0	0	0	0	0	0	0	0	0	0	0
03/02/2006 12:00:00	0	0	0	0	0	0	0	0	0	0	0	0	0
03/02/2006 13:00:00	0	0	0	0	0	0	0	0	0	0	0	0	0
03/02/2006 14:00:00	0	0	0	0	0	0	0	0	0	0	0	0	0
03/02/2006 15:00:00	0	0	0	0	0	0	0	0	0	0	0	0	0
03/02/2006 16:00:00	0	0	0	0	0	0	0	0	0	0	0	0	0
03/02/2006 17:00:00	0	0	0	0	0	0	0	0	0	0	0	0	0
03/02/2006 18:00:00	0	0	0	0	0	0	0	0	0	0	0	0	0
03/02/2006 19:00:00	0	0	0	0	0	0	0	0	0	0	0	0	0
03/02/2006 20:00:00	0	0	0	0	0	0	0	0	0	0	0	0	0
03/02/2006 21:00:00	0	0	0	0	0	0	0	0	0	0	0	0	0
03/02/2006 22:00:00	0	0	0	0	0	0	0	0	0	0	0	0	0
03/02/2006 23:00:00	0	0	0	0	0	0	0	0	0	0	0	0	0
04/02/2006 00:00:00	0.266666667	0.320833333	0.266666667	0.2125	0.245833333	0.320833333	0.220833333	0.291666667	0.291666667	0.308333333	0.291666667	0.229166667	0.441666667
04/02/2006 01:00:00	0.266666667	0.320833333	0.266666667	0.2125	0.245833333	0.320833333	0.220833333	0.291666667	0.291666667	0.308333333	0.291666667	0.229166667	0.441666667
04/02/2006 02:00:00	0.266666667	0.320833333	0.266666667	0.2125	0.245833333	0.320833333	0.220833333	0.291666667	0.291666667	0.308333333	0.291666667	0.229166667	0.441666667
04/02/2006 03:00:00	0.266666667	0.320833333	0.266666667	0.2125	0.245833333	0.320833333	0.220833333	0.291666667	0.291666667	0.308333333	0.291666667	0.229166667	0.441666667
04/02/2006 04:00:00	0.266666667	0.320833333	0.266666667	0.2125	0.245833333	0.320833333	0.220833333	0.291666667	0.291666667	0.308333333	0.291666667	0.229166667	0.441666667
04/02/2006 05:00:00	0.266666667	0.320833333	0.266666667	0.2125	0.245833333	0.320833333	0.220833333	0.291666667	0.291666667	0.308333333	0.291666667	0.229166667	0.441666667
04/02/2006 06:00:00	0.266666667	0.320833333	0.266666667	0.2125	0.245833333	0.320833333	0.220833333	0.291666667	0.291666667	0.308333333	0.291666667	0.229166667	0.441666667
04/02/2006 07:00:00	0.266666667	0.320833333	0.266666667	0.2125	0.245833333	0.320833333	0.220833333	0.291666667	0.291666667	0.308333333	0.291666667	0.229166667	0.441666667
04/02/2006 08:00:00	0.266666667	0.320833333	0.266666667	0.2125	0.245833333	0.320833333	0.220833333	0.291666667	0.291666667	0.308333333	0.291666667	0.229166667	0.441666667
04/02/2006 09:00:00	0.266666667	0.320833333	0.266666667	0.2125	0.245833333	0.320833333	0.220833333	0.291666667	0.291666667	0.308333333	0.291666667	0.229166667	0.441666667
04/02/2006 10:00:00	0.266666667	0.320833333	0.266666667	0.2125	0.245833333	0.320833333	0.220833333	0.291666667	0.291666667	0.308333333	0.291666667	0.229166667	0.441666667
04/02/2006 11:00:00	0.266666667	0.320833333	0.266666667	0.2125	0.245833333	0.320833333	0.220833333	0.291666667	0.291666667	0.308333333	0.291666667	0.229166667	0.441666667
04/02/2006 12:00:00	0.266666667	0.320833333	0.266666667	0.2125	0.245833333	0.320833333	0.220833333	0.291666667	0.291666667	0.308333333	0.291666667	0.229166667	0.441666667
04/02/2006 13:00:00	0.266666667	0.320833333	0.266666667	0.2125	0.245833333	0.320833333	0.220833333	0.291666667	0.291666667	0.308333333	0.291666667	0.229166667	0.441666667
04/02/2006 14:00:00	0.266666667	0.320833333	0.266666667	0.2125	0.245833333	0.320833333	0.220833333	0.291666667	0.291666667	0.308333333	0.291666667	0.229166667	0.441666667
04/02/2006 15:00:00	0.266666667	0.320833333	0.266666667	0.2125	0.245833333	0.320833333	0.220833333	0.291666667	0.291666667	0.308333333	0.291666667	0.229166667	0.441666667
04/02/2006 16:00:00	0.266666667	0.320833333	0.266666667	0.2125	0.245833333	0.320833333	0.220833333	0.291666667	0.291666667	0.308333333	0.291666667	0.229166667	0.441666667
04/02/2006 17:00:00	0.266666667	0.320833333	0.266666667	0.2125	0.245833333	0.320833333	0.220833333	0.291666667	0.291666667	0.308333333	0.291666667	0.229166667	0.441666667
04/02/2006 18:00:00	0.266666667	0.320833333	0.266666667	0.2125	0.245833333	0.320833333	0.220833333	0.291666667	0.291666667	0.308333333	0.291666667	0.229166667	0.441666667
04/02/2006 19:00:00	0.266666667	0.320833333	0.266666667	0.2125	0.245833333	0.320833333	0.220833333	0.291666667	0.291666667	0.308333333	0.291666667	0.229166667	0.441666667
04/02/2006 20:00:00	0.266666667	0.320833333	0.266666667	0.2125	0.245833333	0.320833333	0.220833333	0.291666667	0.291666667	0.308333333	0.291666667	0.229166667	0.441666667
04/02/2006 21:00:00	0.266666667	0.320833333	0.266666667	0.2125	0.245833333	0.320833333	0.220833333	0.291666667	0.291666667	0.308333333	0.291666667	0.229166667	0.441666667
04/02/2006 22:00:00	0.266666667	0.320833333	0.266666667	0.2125	0.245833333	0.320833333	0.220833333	0.291666667	0.291666667	0.308333333	0.291666667	0.229166667	0.441666667
04/02/2006 23:00:00	0.266666667	0.320833333	0.266666667	0.2125	0.245833333	0.320833333	0.220833333	0.291666667	0.291666667	0.308333333	0.291666667	0.229166667	0.441666667
05/02/2006 00:00:00	0.0625	0.016666667	0.033333333	0.05	0.0875	0.216666667	0.1	0.104166667	0.070833333	0.05	0.054166667	0.066666667	0.125
05/02/2006 01:00:00	0.0625	0.016666667	0.033333333	0.05	0.0875	0.216666667	0.1	0.104166667	0.070833333	0.05	0.054166667	0.066666667	0.125
05/02/2006 02:00:00	0.0625	0.016666667	0.033333333	0.05	0.0875	0.216666667	0.1	0.104166667	0.070833333	0.05	0.054166667	0.066666667	0.125
05/02/2006 03:00:00	0.0625	0.016666667	0.033333333	0.05	0.0875	0.216666667	0.1	0.104166667	0.070833333	0.05	0.054166667	0.066666667	0.125
05/02/2006 04:00:00	0.0625	0.016666667	0.033333333	0.05	0.0875	0.216666667	0.1	0.104166667	0.070833333	0.05	0.054166667	0.066666667	0.125
05/02/2006 05:00:00	0.0625	0.016666667	0.033333333	0.05	0.0875	0.216666667	0.1	0.104166667	0.070833333	0.05	0.054166667	0.066666667	0.125
05/02/2006 06:00:00	0.0625	0.016666667	0.033333333	0.05	0.0875	0.216666667	0.1	0.104166667	0.070833333	0.05	0.054166667	0.066666667	0.125
05/02/2006 07:00:00	0.0625	0.016666667	0.033333333	0.05	0.0875	0.216666667	0.1	0.104166667	0.070833333	0.05	0.054166667	0.066666667	0.125
05/02/2006 08:00:00	0.0625	0.016666667	0.033333333	0.05	0.0875	0.216666667	0.1	0.104166667	0.070833333	0.05	0.054166667	0.066666667	0.125
05/02/2006 09:00:00	0.0625	0.016666667	0.033333333	0.05	0.0875	0.216666667	0.1	0.104166667	0.070833333	0.05	0.054166667	0.066666667	0.125
05/02/2006 10:00:00	0.0625	0.016666667	0.033333333	0.05	0.0875	0.216666667	0.1	0.104166667	0.070833333	0.05	0.054166667	0.066666667	0.125
05/02/2006 11:00:00	0.0625	0.016666667	0.033333333	0.05	0.0875	0.216666667	0.1	0.104166667	0.070833333	0.05	0.054166667	0.066666667	0.125
05/02/2006 12:00:00	0.0625	0.016666667	0.033333333	0.05	0.0875	0.216666667	0.1	0.104166667	0.070833333	0.05	0.054166667	0.066666667	0.125
05/02/2006 13:00:00	0.0625	0.016666667	0.033333333	0.05	0.0875	0.216666667	0.1	0.104166667	0.070833333	0.05	0.054166667	0.066666667	0.125
05/02/2006 14:00:00	0.0625	0.016666667	0.033333333	0.05	0.0875	0.216666667	0.1	0.104166667	0.070833333	0.05	0.054166667	0.066666667	0.125
05/02/2006 15:00:00	0.0625	0.016666667	0.033333333	0.05	0.0875	0.216666667	0.1	0.104166667	0.070833333	0.05	0.054166667	0.066666667	0.125
05/02/2006 16:00:00	0.0625	0.016666667	0.033333333	0.05	0.0875	0.216666667	0.1	0.104166667	0.070833333	0.05	0.054166667	0.066666667	0.125
05/02/2006 17:00:00	0.0625	0.016666667	0.033333333	0.05	0.0875	0.216666667	0.1	0.104166667	0.070833333	0.05	0.054166667	0.066666667	0.125
05/02/2006 18:00:00	0.0625	0.016666667	0.033333333	0.05	0.0875	0.216666667	0.1	0.104166667	0.070833333	0.05	0.054166667	0.066666667	0.125
05/02/2006 19:00:00	0.0625	0.016666667	0.033333333	0.05	0.0875	0.216666667	0.1	0.104166667	0.070833333	0.05	0.054166667	0.066666667	0.125
05/02/2006 20:00:00	0.0625	0.016666667	0.033333333	0.05	0.0875	0.216666667	0.1	0.104166667	0.070833333	0.05	0.054166667	0.066666667	0.125
05/02/2006 21:00:00	0.0625	0.016666667	0.033333333	0.05	0.0875	0.216666667	0.1	0.104166667	0.070833333	0.05	0.054166667	0.066666667	0.125
05/02/2006 22:00:00	0.0625	0.016666667	0.033333333	0.05	0.0875	0.216666667	0.1	0.104166667	0.070833333	0.05	0.054166667	0.066666667	0.125
05/02/2006 23:00:00	0.0625	0.016666667	0.033333333	0.05	0.0875	0.216666667	0.1	0.104166667	0.070833333	0.05	0.054166667	0.066666667	0.125
06/02/2006 00:00:00	0	0	0	0	0	0	0	0	0	0	0	0	0
06/02/2006 01:00:00	0	0	0	0	0	0	0	0	0	0	0	0	0
06/02/2006 02:00:00	0	0	0	0	0	0	0	0	0	0	0	0	0
06/02/2006 03:00:00	0	0	0	0	0	0	0	0	0	0	0	0	0
06/02/2006 04:00:00	0	0	0	0	0	0	0	0	0	0	0	0	0
06/02/2006 05:00:00	0	0	0	0	0	0	0	0	0	0	0	0	0
06/02/2006 06:00:00	0	0	0	0	0	0	0	0	0	0	0	0	0
06/02/2006 07:00:00	0	0	0	0	0	0	0	0	0	0	0	0	0
06/02/2006 08:00:00	0	0	0	0	0	0	0	0	0	0	0	0	0
06/02/2006 09:00:00	0	0	0	0	0	0	0	0	0	0	0	0	0
06/02/2006 10:00:00	0	0	0	0	0	0	0	0	0	0	0	0	0
06/02/2006 11:00:00	0	0	0	0	0	0	0	0	0	0	0	0	0
06/02/2006 12:00:00	0	0	0	0	0	0	0	0	0	0	0	0	0
06/02/2006 13:00:00	0	0	0	0	0	0	0	0	0	0	0	0	0
06/02/2006 14:00:00	0	0	0	0	0	0	0	0	0	0	0	0	0
06/02/2006 15:00:00	0	0	0	0	0	0	0	0	0	0	0	0	0
06/02/2006 16:00:00	0	0	0	0	0	0	0	0	0	0	0	0	0
06/02/2006 17:00:00	0	0	0	0	0	0	0	0	0	0	0	0	0
06/02/2006 18:00:00	0	0	0	0	0	0	0	0	0	0	0	0	0
06/02/2006 19:00:00	0	0	0	0	0	0	0	0	0	0	0	0	0
06/02/2006 20:00:00	0	0	0	0	0	0	0	0	0	0	0	0	0
06/02/2006 21:00:00	0	0	0	0	0	0	0	0	0	0	0	0	0
06/02/2006 22:00:00	0	0	0	0	0	0	0	0	0	0	0	0	0
06/02/2006 23:00:00	0	0	0	0	0	0	0	0	0	0	0	0	0
07/02/2006 00:00:00	0	0	0	0	0	0	0	0	0	0	0	0	0
07/02/2006 01:00:00	0	0	0	0	0	0	0	0	0	0	0	0	0
07/02/2006 02:00:00	0	0	0	0	0	0	0	0	0	0	0	0	0
07/02/2006 03:00:00	0	0	0	0	0	0	0	0	0	0	0	0	0
07/02/2006 04:00:00	0	0	0	0	0	0	0	0	0	0	0	0	0
07/02/2006 05:00:00	0	0	0	0	0	0	0	0	0	0	0	0	0
07/02/2006 06:00:00	0	0	0	0	0	0	0	0	0	0	0	0	0
07/02/2006 07:00:00	0	0	0	0	0	0	0	0	0	0	0	0	0
07/02/2006 08:00:00	0	0	0	0	0	0	0	0	0	0	0	0	0
07/02/2006 09:00:00	0	0	0	0	0	0	0	0	0	0	0	0	0
07/02/2006 10:00:00	0	0	0	0	0	0	0	0	0	0	0	0	0
07/02/2006 11:00:00	0	0	0	0	0	0	0	0	0	0	0	0	0
07/02/2006 12:00:00	0	0	0	0	0	0	0	0	0	0	0	0	0
07/02/2006 13:00:00	0	0	0	0	0	0	0	0	0	0	0	0	0
07/02/2006 14:00:00	0	0	0	0	0	0	0	0	0	0	0	0	0
07/02/2006 15:00:00	0	0	0	0	0	0	0	0	0	0	0	0	0
07/02/2006 16:00:00	0	0	0	0	0	0	0	0	0	0	0	0	0
07/02/2006 17:00:00	0	0	0	0	0	0	0	0	0	0	0	0	0
07/02/2006 18:00:00	0	0	0	0	0	0	0	0	0	0	0	0	0
07/02/2006 19:00:00	0	0	0	0	0	0	0	0	0	0	0	0	0
07/02/2006 20:00:00	0	0	0	0	0	0	0	0	0	0	0	0	0
07/02/2006 21:00:00	0	0	0	0	0	0	0	0	0	0	0	0	0
07/02/2006 22:00:00	0	0	0	0	0	0	0	0	0	0	0	0	0
07/02/2006 23:00:00	0	0	0	0	0	0	0	0	0	0	0	0	0
08/02/2006 00:00:00	0.179166667	0.141666667	0.120833333	0.091666667	0.0625	0.033333333	0.0375	0.033333333	0.045833333	0.0375	0.008333333	0.041666667	0.045833333
08/02/2006 01:00:00	0.179166667	0.141666667	0.120833333	0.091666667	0.0625	0.033333333	0.0375	0.033333333	0.045833333	0.0375	0.008333333	0.041666667	0.045833333
08/02/2006 02:00:00	0.179166667	0.141666667	0.120833333	0.091666667	0.0625	0.033333333	0.0375	0.033333333	0.045833333	0.0375	0.008333333	0.041666667	0.045833333
08/02/2006 03:00:00	0.179166667	0.141666667	0.120833333	0.091666667	0.0625	0.033333333	0.0375	0.033333333	0.045833333	0.0375	0.008333333	0.041666667	0.045833333
08/02/2006 04:00:00	0.179166667	0.141666667	0.120833333	0.091666667	0.0625	0.033333333	0.0375	0.033333333	0.045833333	0.0375	0.008333333	0.041666667	0.045833333
08/02/2006 05:00:00	0.179166667	0.141666667	0.120833333	0.091666667	0.0625	0.033333333	0.0375	0.033333333	0.045833333	0.0375	0.008333333	0.041666667	0.045833333
08/02/2006 06:00:00	0.179166667	0.141666667	0.120833333	0.091666667	0.0625	0.033333333	0.0375	0.033333333	0.045833333	0.0375	0.008333333	0.041666667	0.045833333
08/02/2006 07:00:00	0.179166667	0.141666667	0.120833333	0.091666667	0.0625	0.033333333	0.0375	0.033333333	0.045833333	0.0375	0.008333333	0.041666667	0.045833333
08/02/2006 08:00:00	0.179166667	0.141666667	0.120833333	0.091666667	0.0625	0.033333333	0.0375	0.033333333	0.045833333	0.0375	0.008333333	0.041666667	0.045833333
08/02/2006 09:00:00	0.179166667	0.141666667	0.120833333	0.091666667	0.0625	0.033333333	0.0375	0.033333333	0.045833333	0.0375	0.008333333	0.041666667	0.045833333
08/02/2006 10:00:00	0.179166667	0.141666667	0.120833333	0.091666667	0.0625	0.033333333	0.0375	0.033333333	0.045833333	0.0375	0.008333333	0.041666667	0.045833333
08/02/2006 11:00:00	0.179166667	0.141666667	0.120833333	0.091666667	0.0625	0.033333333	0.0375	0.033333333	0.045833333	0.0375	0.008333333	0.041666667	0.045833333
08/02/2006 12:00:00	0.179166667	0.141666667	0.120833333	0.091666667	0.0625	0.033333333	0.0375	0.033333333	0.045833333	0.0375	0.008333333	0.041666667	0.045833333
08/02/2006 13:00:00	0.179166667	0.141666667	0.120833333	0.091666667	0.0625	0.033333333	0.0375	0.033333333	0.045833333	0.0375	0.008333333	0.041666667	0.045833333
08/02/2006 14:00:00	0.179166667	0.141666667	0.120833333	0.091666667	0.0625	0.033333333	0.0375	0.033333333	0.045833333	0.0375	0.008333333	0.041666667	0.045833333
08/02/2006 15:00:00	0.179166667	0.141666667	0.120833333	0.091666667	0.0625	0.033333333	0.0375	0.033333333	0.045833333	0.0375	0.008333333	0.041666667	0.045833333
08/02/2006 16:00:00	0.179166667	0.141666667	0.120833333	0.091666667	0.0625	0.033333333	0.0375	0.033333333	0.045833333	0.0375	0.008333333	0.041666667	0.045833333
08/02/2006 17:00:00	0.179166667	0.141666667	0.120833333	0.091666667	0.0625	0.033333333	0.0375	0.033333333	0.045833333	0.0375	0.008333333	0.041666667	0.045833333
08/02/2006 18:00:00	0.179166667	0.141666667	0.120833333	0.091666667	0.0625	0.033333333	0.0375	0.033333333	0.045833333	0.0375	0.008333333	0.041666667	0.045833333
08/02/2006 19:00:00	0.179166667	0.141666667	0.120833333	0.091666667	0.0625	0.033333333	0.0375	0.033333333	0.045833333	0.0375	0.008333333	0.041666667	0.045833333
08/02/2006 20:00:00	0.179166667	0.141666667	0.120833333	0.091666667	0.0625	0.033333333	0.0375	0.033333333	0.045833333	0.0375	0.008333333	0.041666667	0.045833333
08/02/2006 21:00:00	0.179166667	0.141666667	0.120833333	0.091666667	0.0625	0.033333333	0.0375	0.033333333	0.045833333	0.0375	0.008333333	0.041666667	0.045833333
08/02/2006 22:00:00	0.179166667	0.141666667	0.120833333	0.091666667	0.0625	0.033333333	0.0375	0.033333333	0.045833333	0.0375	0.008333333	0.041666667	0.045833333
08/02/2006 23:00:00	0.179166667	0.141666667	0.120833333	0.091666667	0.0625	0.033333333	0.0375	0.033333333	0.045833333	0.0375	0.008333333	0.041666667	0.045833333
09/02/2006 00:00:00	0	0	0	0	0	0	0	0	0	0	0	0	0
09/02/2006 01:00:00	0	0	0	0	0	0	0	0	0	0	0	0	0
09/02/2006 02:00:00	0	0	0	0	0	0	0	0	0	0	0	0	0
09/02/2006 03:00:00	0	0	0	0	0	0	0	0	0	0	0	0	0
09/02/2006 04:00:00	0	0	0	0	0	0	0	0	0	0	0	0	0
09/02/2006 05:00:00	0	0	0	0	0	0	0	0	0	0	0	0	0
09/02/2006 06:00:00	0	0	0	0	0	0	0	0	0	0	0	0	0
09/02/2006 07:00:00	0	0	0	0	0	0	0	0	0	0	0	0	0
09/02/2006 08:00:00	0	0	0	0	0	0	0	0	0	0	0	0	0
09/02/2006 09:00:00	0	0	0	0	0	0	0	0	0	0	0	0	0
09/02/2006 10:00:00	0	0	0	0	0	0	0	0	0	0	0	0	0
09/02/2006 11:00:00	0	0	0	0	0	0	0	0	0	0	0	0	0
09/02/2006 12:00:00	0	0	0	0	0	0	0	0	0	0	0	0	0
09/02/2006 13:00:00	0	0	0	0	0	0	0	0	0	0	0	0	0
09/02/2006 14:00:00	0	0	0	0	0	0	0	0	0	0	0	0	0
09/02/2006 15:00:00	0	0	0	0	0	0	0	0	0	0	0	0	0
09/02/2006 16:00:00	0	0	0	0	0	0	0	0	0	0	0	0	0
09/02/2006 17:00:00	0	0	0	0	0	0	0	0	0	0	0	0	0
09/02/2006 18:00:00	0	0	0	0	0	0	0	0	0	0	0	0	0
09/02/2006 19:00:00	0	0	0	0	0	0	0	0	0	0	0	0	0
09/02/2006 20:00:00	0	0	0	0	0	0	0	0	0	0	0	0	0
09/02/2006 21:00:00	0	0	0	0	0	0	0	0	0	0	0	0	0
09/02/2006 22:00:00	0	0	0	0	0	0	0	0	0	0	0	0	0
09/02/2006 23:00:00	0	0	0	0	0	0	0	0	0	0	0	0	0
10/02/2006 00:00:00	0	0	0	0	0	0	0	0	0	0	0	0	0
10/02/2006 01:00:00	0	0	0	0	0	0	0	0	0	0	0	0	0
10/02/2006 02:00:00	0	0	0	0	0	0	0	0	0	0	0	0	0
10/02/2006 03:00:00	0	0	0	0	0	0	0	0	0	0	0	0	0
10/02/2006 04:00:00	0	0	0	0	0	0	0	0	0	0	0	0	0
10/02/2006 05:00:00	0	0	0	0	0	0	0	0	0	0	0	0	0
10/02/2006 06:00:00	0	0	0	0	0	0	0	0	0	0	0	0	0
10/02/2006 07:00:00	0	0	0	0	0	0	0	0	0	0	0	0	0
10/02/2006 08:00:00	0	0	0	0	0	0	0	0	0	0	0	0	0
10/02/2006 09:00:00	0	0	0	0	0	0	0	0	0	0	0	0	0
10/02/2006 10:00:00	0	0	0	0	0	0	0	0	0	0	0	0	0
10/02/2006 11:00:00	0	0	0	0	0	0	0	0	0	0	0	0	0
10/02/2006 12:00:00	0	0	0	0	0	0	0	0	0	0	0	0	0
10/02/2006 13:00:00	0	0	0	0	0	0	0	0	0	0	0	0	0
10/02/2006 14:00:00	0	0	0	0	0	0	0	0	0	0	0	0	0
10/02/2006 15:00:00	0	0	0	0	0	0	0	0	0	0	0	0	0
10/02/2006 16:00:00	0	0	0	0	0	0	0	0	0	0	0	0	0
10/02/2006 17:00:00	0	0	0	0	0	0	0	0	0	0	0	0	0
10/02/2006 18:00:00	0	0	0	0	0	0	0	0	0	0	0	0	0
10/02/2006 19:00:00	0	0	0	0	0	0	0	0	0	0	0	0	0
10/02/2006 20:00:00	0	0	0	0	0	0	0	0	0	0	0	0	0
10/02/2006 21:00:00	0	0	0	0	0	0	0	0	0	0	0	0	0
10/02/2006 22:00:00	0	0	0	0	0	0	0	0	0	0	0	0	0
10/02/2006 23:00:00	0	0	0	0	0	0	0	0	0	0	0	0	0
11/02/2006 00:00:00	0	0	0	0	0	0	0	0	0	0	0	0	0
11/02/2006 01:00:00	0	0	0	0	0	0	0	0	0	0	0	0	0
11/02/2006 02:00:00	0	0	0	0	0	0	0	0	0	0	0	0	0
11/02/2006 03:00:00	0	0	0	0	0	0	0	0	0	0	0	0	0
11/02/2006 04:00:00	0	0	0	0	0	0	0	0	0	0	0	0	0
11/02/2006 05:00:00	0	0	0	0	0	0	0	0	0	0	0	0	0
11/02/2006 06:00:00	0	0	0	0	0	0	0	0	0	0	0	0	0
11/02/2006 07:00:00	0	0	0	0	0	0	0	0	0	0	0	0	0
11/02/2006 08:00:00	0	0	0	0	0	0	0	0	0	0	0	0	0
11/02/2006 09:00:00	0	0	0	0	0	0	0	0	0	0	0	0	0
11/02/2006 10:00:00	0	0	0	0	0	0	0	0	0	0	0	0	0
11/02/2006 11:00:00	0	0	0	0	0	0	0	0	0	0	0	0	0
11/02/2006 12:00:00	0	0	0	0	0	0	0	0	0	0	0	0	0
11/02/2006 13:00:00	0	0	0	0	0	0	0	0	0	0	0	0	0
11/02/2006 14:00:00	0	0	0	0	0	0	0	0	0	0	0	0	0
11/02/2006 15:00:00	0	0	0	0	0	0	0	0	0	0	0	0	0
11/02/2006 16:00:00	0	0	0	0	0	0	0	0	0	0	0	0	0
11/02/2006 17:00:00	0	0	0	0	0	0	0	0	0	0	0	0	0
11/02/2006 18:00:00	0	0	0	0	0	0	0	0	0	0	0	0	0
11/02/2006 19:00:00	0	0	0	0	0	0	0	0	0	0	0	0	0
11/02/2006 20:00:00	0	0	0	0	0	0	0	0	0	0	0	0	0
11/02/2006 21:00:00	0	0	0	0	0	0	0	0	0	0	0	0	0
11/02/2006 22:00:00	0	0	0	0	0	0	0	0	0	0	0	0	0
11/02/2006 23:00:00	0	0	0	0	0	0	0	0	0	0	0	0	0
12/02/2006 00:00:00	0	0	0	0	0	0	0	0	0	0	0	0	0
12/02/2006 01:00:00	0	0	0	0	0	0	0	0	0	0	0	0	0
12/02/2006 02:00:00	0	0	0	0	0	0	0	0	0	0	0	0	0
12/02/2006 03:00:00	0	0	0	0	0	0	0	0	0	0	0	0	0
12/02/2006 04:00:00	0	0	0	0	0	0	0	0	0	0	0	0	0
12/02/2006 05:00:00	0	0	0	0	0	0	0	0	0	0	0	0	0
12/02/2006 06:00:00	0	0	0	0	0	0	0	0	0	0	0	0	0
12/02/2006 07:00:00	0	0	0	0	0	0	0	0	0	0	0	0	0
12/02/2006 08:00:00	0	0	0	0	0	0	0	0	0	0	0	0	0
12/02/2006 09:00:00	0	0	0	0	0	0	0	0	0	0	0	0	0
12/02/2006 10:00:00	0	0	0	0	0	0	0	0	0	0	0	0	0
12/02/2006 11:00:00	0	0	0	0	0	0	0	0	0	0	0	0	0
12/02/2006 12:00:00	0	0	0	0	0	0	0	0	0	0	0	0	0
12/02/2006 13:00:00	0	0	0	0	0	0	0	0	0	0	0	0	0
12/02/2006 14:00:00	0	0	0	0	0	0	0	0	0	0	0	0	0
12/02/2006 15:00:00	0	0	0	0	0	0	0	0	0	0	0	0	0
12/02/2006 16:00:00	0	0	0	0	0	0	0	0	0	0	0	0	0
12/02/2006 17:00:00	0	0	0	0	0	0	0	0	0	0	0	0	0
12/02/2006 18:00:00	0	0	0	0	0	0	0	0	0	0	0	0	0
12/02/2006 19:00:00	0	0	0	0	0	0	0	0	0	0	0	0	0
12/02/2006 20:00:00	0	0	0	0	0	0	0	0	0	0	0	0	0
12/02/2006 21:00:00	0	0	0	0	0	0	0	0	0	0	0	0	0
12/02/2006 22:00:00	0	0	0	0	0	0	0	0	0	0	0	0	0
12/02/2006 23:00:00	0	0	0	0	0	0	0	0	0	0	0	0	0
13/02/2006 00:00:00	0	0	0	0	0	0	0	0	0	0	0	0	0.033333333
13/02/2006 01:00:00	0	0	0	0	0	0	0	0	0	0	0	0	0.033333333
13/02/2006 02:00:00	0	0	0	0	0	0	0	0	0	0	0	0	0.033333333
13/02/2006 03:00:00	0	0	0	0	0	0	0	0	0	0	0	0	0.033333333
13/02/2006 04:00:00	0	0	0	0	0	0	0	0	0	0	0	0	0.033333333
13/02/2006 05:00:00	0	0	0	0	0	0	0	0	0	0	0	0	0.033333333
13/02/2006 06:00:00	0	0	0	0	0	0	0	0	0	0	0	0	0.033333333
13/02/2006 07:00:00	0	0	0	0	0	0	0	0	0	0	0	0	0.033333333
13/02/2006 08:00:00	0	0	0	0	0	0	0	0	0	0	0	0	0.033333333
13/02/2006 09:00:00	0	0	0	0	0	0	0	0	0	0	0	0	0.033333333
13/02/2006 10:00:00	0	0	0	0	0	0	0	0	0	0	0	0	0.033333333
13/02/2006 11:00:00	0	0	0	0	0	0	0	0	0	0	0	0	0.033333333
13/02/2006 12:00:00	0	0	0	0	0	0	0	0	0	0	0	0	0.033333333
13/02/2006 13:00:00	0	0	0	0	0	0	0	0	0	0	0	0	0.033333333
13/02/2006 14:00:00	0	0	0	0	0	0	0	0	0	0	0	0	0.033333333
13/02/2006 15:00:00	0	0	0	0	0	0	0	0	0	0	0	0	0.033333333
13/02/2006 16:00:00	0	0	0	0	0	0	0	0	0	0	0	0	0.033333333
13/02/2006 17:00:00	0	0	0	0	0	0	0	0	0	0	0	0	0.033333333
13/02/2006 18:00:00	0	0	0	0	0	0	0	0	0	0	0	0	0.033333333
13/02/2006 19:00:00	0	0	0	0	0	0	0	0	0	0	0	0	0.033333333
13/02/2006 20:00:00	0	0	0	0	0	0	0	0	0	0	0	0	0.033333333
13/02/2006 21:00:00	0	0	0	0	0	0	0	0	0	0	0	0	0.033333333
13/02/2006 22:00:00	0	0	0	0	0	0	0	0	0	0	0	0	0.033333333
13/02/2006 23:00:00	0	0	0	0	0	0	0	0	0	0	0	0	0.033333333
14/02/2006 00:00:00	0.145833333	0.104166667	0.1125	0.258333333	0.270833333	0.175	0.570833333	0.820833333	1.095833333	0.9625	0.8125	0.6625	1.55
14/02/2006 01:00:00	0.145833333	0.104166667	0.1125	0.258333333	0.270833333	0.175	0.570833333	0.820833333	1.095833333	0.9625	0.8125	0.6625	1.55
14/02/2006 02:00:00	0.145833333	0.104166667	0.1125	0.258333333	0.270833333	0.175	0.570833333	0.820833333	1.095833333	0.9625	0.8125	0.6625	1.55
14/02/2006 03:00:00	0.145833333	0.104166667	0.1125	0.258333333	0.270833333	0.175	0.570833333	0.820833333	1.095833333	0.9625	0.8125	0.6625	1.55
14/02/2006 04:00:00	0.145833333	0.104166667	0.1125	0.258333333	0.270833333	0.175	0.570833333	0.820833333	1.095833333	0.9625	0.8125	0.6625	1.55
14/02/2006 05:00:00	0.145833333	0.104166667	0.1125	0.258333333	0.270833333	0.175	0.570833333	0.820833333	1.095833333	0.9625	0.8125	0.6625	1.55
14/02/2006 06:00:00	0.145833333	0.104166667	0.1125	0.258333333	0.270833333	0.175	0.570833333	0.820833333	1.095833333	0.9625	0.8125	0.6625	1.55
14/02/2006 07:00:00	0.145833333	0.104166667	0.1125	0.258333333	0.270833333	0.175	0.570833333	0.820833333	1.095833333	0.9625	0.8125	0.6625	1.55
14/02/2006 08:00:00	0.145833333	0.104166667	0.1125	0.258333333	0.270833333	0.175	0.570833333	0.820833333	1.095833333	0.9625	0.8125	0.6625	1.55
14/02/2006 09:00:00	0.145833333	0.104166667	0.1125	0.258333333	0.270833333	0.175	0.570833333	0.820833333	1.095833333	0.9625	0.8125	0.6625	1.55
14/02/2006 10:00:00	0.145833333	0.104166667	0.1125	0.258333333	0.270833333	0.175	0.570833333	0.820833333	1.095833333	0.9625	0.8125	0.6625	1.55
14/02/2006 11:00:00	0.145833333	0.104166667	0.1125	0.258333333	0.270833333	0.175	0.570833333	0.820833333	1.095833333	0.9625	0.8125	0.6625	1.55
14/02/2006 12:00:00	0.145833333	0.104166667	0.1125	0.258333333	0.270833333	0.175	0.570833333	0.820833333	1.095833333	0.9625	0.8125	0.6625	1.55
14/02/2006 13:00:00	0.145833333	0.104166667	0.1125	0.258333333	0.270833333	0.175	0.570833333	0.820833333	1.095833333	0.9625	0.8125	0.6625	1.55
14/02/2006 14:00:00	0.145833333	0.104166667	0.1125	0.258333333	0.270833333	0.175	0.570833333	0.820833333	1.095833333	0.9625	0.8125	0.6625	1.55
14/02/2006 15:00:00	0.145833333	0.104166667	0.1125	0.258333333	0.270833333	0.175	0.570833333	0.820833333	1.095833333	0.9625	0.8125	0.6625	1.55
14/02/2006 16:00:00	0.145833333	0.104166667	0.1125	0.258333333	0.270833333	0.175	0.570833333	0.820833333	1.095833333	0.9625	0.8125	0.6625	1.55
14/02/2006 17:00:00	0.145833333	0.104166667	0.1125	0.258333333	0.270833333	0.175	0.570833333	0.820833333	1.095833333	0.9625	0.8125	0.6625	1.55
14/02/2006 18:00:00	0.145833333	0.104166667	0.1125	0.258333333	0.270833333	0.175	0.570833333	0.820833333	1.095833333	0.9625	0.8125	0.6625	1.55
14/02/2006 19:00:00	0.145833333	0.104166667	0.1125	0.258333333	0.270833333	0.175	0.570833333	0.820833333	1.095833333	0.9625	0.8125	0.6625	1.55
14/02/2006 20:00:00	0.145833333	0.104166667	0.1125	0.258333333	0.270833333	0.175	0.570833333	0.820833333	1.095833333	0.9625	0.8125	0.6625	1.55
14/02/2006 21:00:00	0.145833333	0.104166667	0.1125	0.258333333	0.270833333	0.175	0.570833333	0.820833333	1.095833333	0.9625	0.8125	0.6625	1.55
14/02/2006 22:00:00	0.145833333	0.104166667	0.1125	0.258333333	0.270833333	0.175	0.570833333	0.820833333	1.095833333	0.9625	0.8125	0.6625	1.55
14/02/2006 23:00:00	0.145833333	0.104166667	0.1125	0.258333333	0.270833333	0.175	0.570833333	0.820833333	1.095833333	0.9625	0.8125	0.6625	1.55
15/02/2006 00:00:00	0.083333333	0.041666667	0.166666667	0.104166667	0.195833333	0.166666667	0.3375	0.245833333	0.370833333	0.316666667	0.145833333	0.195833333	0.545833333
15/02/2006 01:00:00	0.083333333	0.041666667	0.166666667	0.104166667	0.195833333	0.166666667	0.3375	0.245833333	0.370833333	0.316666667	0.145833333	0.195833333	0.545833333
15/02/2006 02:00:00	0.083333333	0.041666667	0.166666667	0.104166667	0.195833333	0.166666667	0.3375	0.245833333	0.370833333	0.316666667	0.145833333	0.195833333	0.545833333
15/02/2006 03:00:00	0.083333333	0.041666667	0.166666667	0.104166667	0.195833333	0.166666667	0.3375	0.245833333	0.370833333	0.316666667	0.145833333	0.195833333	0.545833333
15/02/2006 04:00:00	0.083333333	0.041666667	0.166666667	0.104166667	0.195833333	0.166666667	0.3375	0.245833333	0.370833333	0.316666667	0.145833333	0.195833333	0.545833333
15/02/2006 05:00:00	0.083333333	0.041666667	0.166666667	0.104166667	0.195833333	0.166666667	0.3375	0.245833333	0.370833333	0.316666667	0.145833333	0.195833333	0.545833333
15/02/2006 06:00:00	0.083333333	0.041666667	0.166666667	0.104166667	0.195833333	0.166666667	0.3375	0.245833333	0.370833333	0.316666667	0.145833333	0.195833333	0.545833333
15/02/2006 07:00:00	0.083333333	0.041666667	0.166666667	0.104166667	0.195833333	0.166666667	0.3375	0.245833333	0.370833333	0.316666667	0.145833333	0.195833333	0.545833333
15/02/2006 08:00:00	0.083333333	0.041666667	0.166666667	0.104166667	0.195833333	0.166666667	0.3375	0.245833333	0.370833333	0.316666667	0.145833333	0.195833333	0.545833333
15/02/2006 09:00:00	0.083333333	0.041666667	0.166666667	0.104166667	0.195833333	0.166666667	0.3375	0.245833333	0.370833333	0.316666667	0.145833333	0.195833333	0.545833333
15/02/2006 10:00:00	0.083333333	0.041666667	0.166666667	0.104166667	0.195833333	0.166666667	0.3375	0.245833333	0.370833333	0.316666667	0.145833333	0.195833333	0.545833333
15/02/2006 11:00:00	0.083333333	0.041666667	0.166666667	0.104166667	0.195833333	0.166666667	0.3375	0.245833333	0.370833333	0.316666667	0.145833333	0.195833333	0.545833333
15/02/2006 12:00:00	0.083333333	0.041666667	0.166666667	0.104166667	0.195833333	0.166666667	0.3375	0.245833333	0.370833333	0.316666667	0.145833333	0.195833333	0.545833333
15/02/2006 13:00:00	0.083333333	0.041666667	0.166666667	0.104166667	0.195833333	0.166666667	0.3375	0.245833333	0.370833333	0.316666667	0.145833333	0.195833333	0.545833333
15/02/2006 14:00:00	0.083333333	0.041666667	0.166666667	0.104166667	0.195833333	0.166666667	0.3375	0.245833333	0.370833333	0.316666667	0.145833333	0.195833333	0.545833333
15/02/2006 15:00:00	0.083333333	0.041666667	0.166666667	0.104166667	0.195833333	0.166666667	0.3375	0.245833333	0.370833333	0.316666667	0.145833333	0.195833333	0.545833333
15/02/2006 16:00:00	0.083333333	0.041666667	0.166666667	0.104166667	0.195833333	0.166666667	0.3375	0.245833333	0.370833333	0.316666667	0.145833333	0.195833333	0.545833333
15/02/2006 17:00:00	0.083333333	0.041666667	0.166666667	0.104166667	0.195833333	0.166666667	0.3375	0.245833333	0.370833333	0.316666667	0.145833333	0.195833333	0.545833333
15/02/2006 18:00:00	0.083333333	0.041666667	0.166666667	0.104166667	0.195833333	0.166666667	0.3375	0.245833333	0.370833333	0.316666667	0.145833333	0.195833333	0.545833333
15/02/2006 19:00:00	0.083333333	0.041666667	0.166666667	0.104166667	0.195833333	0.166666667	0.3375	0.245833333	0.370833333	0.316666667	0.145833333	0.195833333	0.545833333
15/02/2006 20:00:00	0.083333333	0.041666667	0.166666667	0.104166667	0.195833333	0.166666667	0.3375	0.245833333	0.370833333	0.316666667	0.145833333	0.195833333	0.545833333
15/02/2006 21:00:00	0.083333333	0.041666667	0.166666667	0.104166667	0.195833333	0.166666667	0.3375	0.245833333	0.370833333	0.316666667	0.145833333	0.195833333	0.545833333
15/02/2006 22:00:00	0.083333333	0.041666667	0.166666667	0.104166667	0.195833333	0.166666667	0.3375	0.245833333	0.370833333	0.316666667	0.145833333	0.195833333	0.545833333
15/02/2006 23:00:00	0.083333333	0.041666667	0.166666667	0.104166667	0.195833333	0.166666667	0.3375	0.245833333	0.370833333	0.316666667	0.145833333	0.195833333	0.545833333
16/02/2006 00:00:00	0	0	0	0	0	0	0.016666667	0.033333333	0	0	0.05	0	0.033333333
16/02/2006 01:00:00	0	0	0	0	0	0	0.016666667	0.033333333	0	0	0.05	0	0.033333333
16/02/2006 02:00:00	0	0	0	0	0	0	0.016666667	0.033333333	0	0	0.05	0	0.033333333
16/02/2006 03:00:00	0	0	0	0	0	0	0.016666667	0.033333333	0	0	0.05	0	0.033333333
16/02/2006 04:00:00	0	0	0	0	0	0	0.016666667	0.033333333	0	0	0.05	0	0.033333333
16/02/2006 05:00:00	0	0	0	0	0	0	0.016666667	0.033333333	0	0	0.05	0	0.033333333
16/02/2006 06:00:00	0	0	0	0	0	0	0.016666667	0.033333333	0	0	0.05	0	0.033333333
16/02/2006 07:00:00	0	0	0	0	0	0	0.016666667	0.033333333	0	0	0.05	0	0.033333333
16/02/2006 08:00:00	0	0	0	0	0	0	0.016666667	0.033333333	0	0	0.05	0	0.033333333
16/02/2006 09:00:00	0	0	0	0	0	0	0.016666667	0.033333333	0	0	0.05	0	0.033333333
16/02/2006 10:00:00	0	0	0	0	0	0	0.016666667	0.033333333	0	0	0.05	0	0.033333333
16/02/2006 11:00:00	0	0	0	0	0	0	0.016666667	0.033333333	0	0	0.05	0	0.033333333
16/02/2006 12:00:00	0	0	0	0	0	0	0.016666667	0.033333333	0	0	0.05	0	0.033333333
16/02/2006 13:00:00	0	0	0	0	0	0	0.016666667	0.033333333	0	0	0.05	0	0.033333333
16/02/2006 14:00:00	0	0	0	0	0	0	0.016666667	0.033333333	0	0	0.05	0	0.033333333
16/02/2006 15:00:00	0	0	0	0	0	0	0.016666667	0.033333333	0	0	0.05	0	0.033333333
16/02/2006 16:00:00	0	0	0	0	0	0	0.016666667	0.033333333	0	0	0.05	0	0.033333333
16/02/2006 17:00:00	0	0	0	0	0	0	0.016666667	0.033333333	0	0	0.05	0	0.033333333
16/02/2006 18:00:00	0	0	0	0	0	0	0.016666667	0.033333333	0	0	0.05	0	0.033333333
16/02/2006 19:00:00	0	0	0	0	0	0	0.016666667	0.033333333	0	0	0.05	0	0.033333333
16/02/2006 20:00:00	0	0	0	0	0	0	0.016666667	0.033333333	0	0	0.05	0	0.033333333
16/02/2006 21:00:00	0	0	0	0	0	0	0.016666667	0.033333333	0	0	0.05	0	0.033333333
16/02/2006 22:00:00	0	0	0	0	0	0	0.016666667	0.033333333	0	0	0.05	0	0.033333333
16/02/2006 23:00:00	0	0	0	0	0	0	0.016666667	0.033333333	0	0	0.05	0	0.033333333
17/02/2006 00:00:00	0	0	0	0	0	0	0	0	0	0	0	0	0.029166667
17/02/2006 01:00:00	0	0	0	0	0	0	0	0	0	0	0	0	0.029166667
17/02/2006 02:00:00	0	0	0	0	0	0	0	0	0	0	0	0	0.029166667
17/02/2006 03:00:00	0	0	0	0	0	0	0	0	0	0	0	0	0.029166667
17/02/2006 04:00:00	0	0	0	0	0	0	0	0	0	0	0	0	0.029166667
17/02/2006 05:00:00	0	0	0	0	0	0	0	0	0	0	0	0	0.029166667
17/02/2006 06:00:00	0	0	0	0	0	0	0	0	0	0	0	0	0.029166667
17/02/2006 07:00:00	0	0	0	0	0	0	0	0	0	0	0	0	0.029166667
17/02/2006 08:00:00	0	0	0	0	0	0	0	0	0	0	0	0	0.029166667
17/02/2006 09:00:00	0	0	0	0	0	0	0	0	0	0	0	0	0.029166667
17/02/2006 10:00:00	0	0	0	0	0	0	0	0	0	0	0	0	0.029166667
17/02/2006 11:00:00	0	0	0	0	0	0	0	0	0	0	0	0	0.029166667
17/02/2006 12:00:00	0	0	0	0	0	0	0	0	0	0	0	0	0.029166667
17/02/2006 13:00:00	0	0	0	0	0	0	0	0	0	0	0	0	0.029166667
17/02/2006 14:00:00	0	0	0	0	0	0	0	0	0	0	0	0	0.029166667
17/02/2006 15:00:00	0	0	0	0	0	0	0	0	0	0	0	0	0.029166667
17/02/2006 16:00:00	0	0	0	0	0	0	0	0	0	0	0	0	0.029166667
17/02/2006 17:00:00	0	0	0	0	0	0	0	0	0	0	0	0	0.029166667
17/02/2006 18:00:00	0	0	0	0	0	0	0	0	0	0	0	0	0.029166667
17/02/2006 19:00:00	0	0	0	0	0	0	0	0	0	0	0	0	0.029166667
17/02/2006 20:00:00	0	0	0	0	0	0	0	0	0	0	0	0	0.029166667
17/02/2006 21:00:00	0	0	0	0	0	0	0	0	0	0	0	0	0.029166667
17/02/2006 22:00:00	0	0	0	0	0	0	0	0	0	0	0	0	0.029166667
17/02/2006 23:00:00	0	0	0	0	0	0	0	0	0	0	0	0	0.029166667
18/02/2006 00:00:00	0	0	0	0	0	0	0	0	0	0	0	0	0
18/02/2006 01:00:00	0	0	0	0	0	0	0	0	0	0	0	0	0
18/02/2006 02:00:00	0	0	0	0	0	0	0	0	0	0	0	0	0
18/02/2006 03:00:00	0	0	0	0	0	0	0	0	0	0	0	0	0
18/02/2006 04:00:00	0	0	0	0	0	0	0	0	0	0	0	0	0
18/02/2006 05:00:00	0	0	0	0	0	0	0	0	0	0	0	0	0
18/02/2006 06:00:00	0	0	0	0	0	0	0	0	0	0	0	0	0
18/02/2006 07:00:00	0	0	0	0	0	0	0	0	0	0	0	0	0
18/02/2006 08:00:00	0	0	0	0	0	0	0	0	0	0	0	0	0
18/02/2006 09:00:00	0	0	0	0	0	0	0	0	0	0	0	0	0
18/02/2006 10:00:00	0	0	0	0	0	0	0	0	0	0	0	0	0
18/02/2006 11:00:00	0	0	0	0	0	0	0	0	0	0	0	0	0
18/02/2006 12:00:00	0	0	0	0	0	0	0	0	0	0	0	0	0
18/02/2006 13:00:00	0	0	0	0	0	0	0	0	0	0	0	0	0
18/02/2006 14:00:00	0	0	0	0	0	0	0	0	0	0	0	0	0
18/02/2006 15:00:00	0	0	0	0	0	0	0	0	0	0	0	0	0
18/02/2006 16:00:00	0	0	0	0	0	0	0	0	0	0	0	0	0
18/02/2006 17:00:00	0	0	0	0	0	0	0	0	0	0	0	0	0
18/02/2006 18:00:00	0	0	0	0	0	0	0	0	0	0	0	0	0
18/02/2006 19:00:00	0	0	0	0	0	0	0	0	0	0	0	0	0
18/02/2006 20:00:00	0	0	0	0	0	0	0	0	0	0	0	0	0
18/02/2006 21:00:00	0	0	0	0	0	0	0	0	0	0	0	0	0
18/02/2006 22:00:00	0	0	0	0	0	0	0	0	0	0	0	0	0
18/02/2006 23:00:00	0	0	0	0	0	0	0	0	0	0	0	0	0
19/02/2006 00:00:00	0	0	0	0	0	0	0	0	0	0	0	0	0
19/02/2006 01:00:00	0	0	0	0	0	0	0	0	0	0	0	0	0
19/02/2006 02:00:00	0	0	0	0	0	0	0	0	0	0	0	0	0
19/02/2006 03:00:00	0	0	0	0	0	0	0	0	0	0	0	0	0
19/02/2006 04:00:00	0	0	0	0	0	0	0	0	0	0	0	0	0
19/02/2006 05:00:00	0	0	0	0	0	0	0	0	0	0	0	0	0
19/02/2006 06:00:00	0	0	0	0	0	0	0	0	0	0	0	0	0
19/02/2006 07:00:00	0	0	0	0	0	0	0	0	0	0	0	0	0
19/02/2006 08:00:00	0	0	0	0	0	0	0	0	0	0	0	0	0
19/02/2006 09:00:00	0	0	0	0	0	0	0	0	0	0	0	0	0
19/02/2006 10:00:00	0	0	0	0	0	0	0	0	0	0	0	0	0
19/02/2006 11:00:00	0	0	0	0	0	0	0	0	0	0	0	0	0
19/02/2006 12:00:00	0	0	0	0	0	0	0	0	0	0	0	0	0
19/02/2006 13:00:00	0	0	0	0	0	0	0	0	0	0	0	0	0
19/02/2006 14:00:00	0	0	0	0	0	0	0	0	0	0	0	0	0
19/02/2006 15:00:00	0	0	0	0	0	0	0	0	0	0	0	0	0
19/02/2006 16:00:00	0	0	0	0	0	0	0	0	0	0	0	0	0
19/02/2006 17:00:00	0	0	0	0	0	0	0	0	0	0	0	0	0
19/02/2006 18:00:00	0	0	0	0	0	0	0	0	0	0	0	0	0
19/02/2006 19:00:00	0	0	0	0	0	0	0	0	0	0	0	0	0
19/02/2006 20:00:00	0	0	0	0	0	0	0	0	0	0	0	0	0
19/02/2006 21:00:00	0	0	0	0	0	0	0	0	0	0	0	0	0
19/02/2006 22:00:00	0	0	0	0	0	0	0	0	0	0	0	0	0
19/02/2006 23:00:00	0	0	0	0	0	0	0	0	0	0	0	0	0
20/02/2006 00:00:00	0	0	0	0	0	0	0	0	0	0	0	0	0
20/02/2006 01:00:00	0	0	0	0	0	0	0	0	0	0	0	0	0
20/02/2006 02:00:00	0	0	0	0	0	0	0	0	0	0	0	0	0
20/02/2006 03:00:00	0	0	0	0	0	0	0	0	0	0	0	0	0
20/02/2006 04:00:00	0	0	0	0	0	0	0	0	0	0	0	0	0
20/02/2006 05:00:00	0	0	0	0	0	0	0	0	0	0	0	0	0
20/02/2006 06:00:00	0	0	0	0	0	0	0	0	0	0	0	0	0
20/02/2006 07:00:00	0	0	0	0	0	0	0	0	0	0	0	0	0
20/02/2006 08:00:00	0	0	0	0	0	0	0	0	0	0	0	0	0
20/02/2006 09:00:00	0	0	0	0	0	0	0	0	0	0	0	0	0
20/02/2006 10:00:00	0	0	0	0	0	0	0	0	0	0	0	0	0
20/02/2006 11:00:00	0	0	0	0	0	0	0	0	0	0	0	0	0
20/02/2006 12:00:00	0	0	0	0	0	0	0	0	0	0	0	0	0
20/02/2006 13:00:00	0	0	0	0	0	0	0	0	0	0	0	0	0
20/02/2006 14:00:00	0	0	0	0	0	0	0	0	0	0	0	0	0
20/02/2006 15:00:00	0	0	0	0	0	0	0	0	0	0	0	0	0
20/02/2006 16:00:00	0	0	0	0	0	0	0	0	0	0	0	0	0
20/02/2006 17:00:00	0	0	0	0	0	0	0	0	0	0	0	0	0
20/02/2006 18:00:00	0	0	0	0	0	0	0	0	0	0	0	0	0
20/02/2006 19:00:00	0	0	0	0	0	0	0	0	0	0	0	0	0
20/02/2006 20:00:00	0	0	0	0	0	0	0	0	0	0	0	0	0
20/02/2006 21:00:00	0	0	0	0	0	0	0	0	0	0	0	0	0
20/02/2006 22:00:00	0	0	0	0	0	0	0	0	0	0	0	0	0
20/02/2006 23:00:00	0	0	0	0	0	0	0	0	0	0	0	0	0
21/02/2006 00:00:00	0	0	0	0	0	0	0.020833333	0.008333333	0	0	0.008333333	0.016666667	0
21/02/2006 01:00:00	0	0	0	0	0	0	0.020833333	0.008333333	0	0	0.008333333	0.016666667	0
21/02/2006 02:00:00	0	0	0	0	0	0	0.020833333	0.008333333	0	0	0.008333333	0.016666667	0
21/02/2006 03:00:00	0	0	0	0	0	0	0.020833333	0.008333333	0	0	0.008333333	0.016666667	0
21/02/2006 04:00:00	0	0	0	0	0	0	0.020833333	0.008333333	0	0	0.008333333	0.016666667	0
21/02/2006 05:00:00	0	0	0	0	0	0	0.020833333	0.008333333	0	0	0.008333333	0.016666667	0
21/02/2006 06:00:00	0	0	0	0	0	0	0.020833333	0.008333333	0	0	0.008333333	0.016666667	0
21/02/2006 07:00:00	0	0	0	0	0	0	0.020833333	0.008333333	0	0	0.008333333	0.016666667	0
21/02/2006 08:00:00	0	0	0	0	0	0	0.020833333	0.008333333	0	0	0.008333333	0.016666667	0
21/02/2006 09:00:00	0	0	0	0	0	0	0.020833333	0.008333333	0	0	0.008333333	0.016666667	0
21/02/2006 10:00:00	0	0	0	0	0	0	0.020833333	0.008333333	0	0	0.008333333	0.016666667	0
21/02/2006 11:00:00	0	0	0	0	0	0	0.020833333	0.008333333	0	0	0.008333333	0.016666667	0
21/02/2006 12:00:00	0	0	0	0	0	0	0.020833333	0.008333333	0	0	0.008333333	0.016666667	0
21/02/2006 13:00:00	0	0	0	0	0	0	0.020833333	0.008333333	0	0	0.008333333	0.016666667	0
21/02/2006 14:00:00	0	0	0	0	0	0	0.020833333	0.008333333	0	0	0.008333333	0.016666667	0
21/02/2006 15:00:00	0	0	0	0	0	0	0.020833333	0.008333333	0	0	0.008333333	0.016666667	0
21/02/2006 16:00:00	0	0	0	0	0	0	0.020833333	0.008333333	0	0	0.008333333	0.016666667	0
21/02/2006 17:00:00	0	0	0	0	0	0	0.020833333	0.008333333	0	0	0.008333333	0.016666667	0
21/02/2006 18:00:00	0	0	0	0	0	0	0.020833333	0.008333333	0	0	0.008333333	0.016666667	0
21/02/2006 19:00:00	0	0	0	0	0	0	0.020833333	0.008333333	0	0	0.008333333	0.016666667	0
21/02/2006 20:00:00	0	0	0	0	0	0	0.020833333	0.008333333	0	0	0.008333333	0.016666667	0
21/02/2006 21:00:00	0	0	0	0	0	0	0.020833333	0.008333333	0	0	0.008333333	0.016666667	0
21/02/2006 22:00:00	0	0	0	0	0	0	0.020833333	0.008333333	0	0	0.008333333	0.016666667	0
21/02/2006 23:00:00	0	0	0	0	0	0	0.020833333	0.008333333	0	0	0.008333333	0.016666667	0
22/02/2006 00:00:00	0	0	0	0	0	0	0	0	0	0	0	0	0
22/02/2006 01:00:00	0	0	0	0	0	0	0	0	0	0	0	0	0
22/02/2006 02:00:00	0	0	0	0	0	0	0	0	0	0	0	0	0
22/02/2006 03:00:00	0	0	0	0	0	0	0	0	0	0	0	0	0
22/02/2006 04:00:00	0	0	0	0	0	0	0	0	0	0	0	0	0
22/02/2006 05:00:00	0	0	0	0	0	0	0	0	0	0	0	0	0
22/02/2006 06:00:00	0	0	0	0	0	0	0	0	0	0	0	0	0
22/02/2006 07:00:00	0	0	0	0	0	0	0	0	0	0	0	0	0
22/02/2006 08:00:00	0	0	0	0	0	0	0	0	0	0	0	0	0
22/02/2006 09:00:00	0	0	0	0	0	0	0	0	0	0	0	0	0
22/02/2006 10:00:00	0	0	0	0	0	0	0	0	0	0	0	0	0
22/02/2006 11:00:00	0	0	0	0	0	0	0	0	0	0	0	0	0
22/02/2006 12:00:00	0	0	0	0	0	0	0	0	0	0	0	0	0
22/02/2006 13:00:00	0	0	0	0	0	0	0	0	0	0	0	0	0
22/02/2006 14:00:00	0	0	0	0	0	0	0	0	0	0	0	0	0
22/02/2006 15:00:00	0	0	0	0	0	0	0	0	0	0	0	0	0
22/02/2006 16:00:00	0	0	0	0	0	0	0	0	0	0	0	0	0
22/02/2006 17:00:00	0	0	0	0	0	0	0	0	0	0	0	0	0
22/02/2006 18:00:00	0	0	0	0	0	0	0	0	0	0	0	0	0
22/02/2006 19:00:00	0	0	0	0	0	0	0	0	0	0	0	0	0
22/02/2006 20:00:00	0	0	0	0	0	0	0	0	0	0	0	0	0
22/02/2006 21:00:00	0	0	0	0	0	0	0	0	0	0	0	0	0
22/02/2006 22:00:00	0	0	0	0	0	0	0	0	0	0	0	0	0
22/02/2006 23:00:00	0	0	0	0	0	0	0	0	0	0	0	0	0
23/02/2006 00:00:00	0	0	0	0	0	0	0	0	0	0	0	0	0
23/02/2006 01:00:00	0	0	0	0	0	0	0	0	0	0	0	0	0
23/02/2006 02:00:00	0	0	0	0	0	0	0	0	0	0	0	0	0
23/02/2006 03:00:00	0	0	0	0	0	0	0	0	0	0	0	0	0
23/02/2006 04:00:00	0	0	0	0	0	0	0	0	0	0	0	0	0
23/02/2006 05:00:00	0	0	0	0	0	0	0	0	0	0	0	0	0
23/02/2006 06:00:00	0	0	0	0	0	0	0	0	0	0	0	0	0
23/02/2006 07:00:00	0	0	0	0	0	0	0	0	0	0	0	0	0
23/02/2006 08:00:00	0	0	0	0	0	0	0	0	0	0	0	0	0
23/02/2006 09:00:00	0	0	0	0	0	0	0	0	0	0	0	0	0
23/02/2006 10:00:00	0	0	0	0	0	0	0	0	0	0	0	0	0
23/02/2006 11:00:00	0	0	0	0	0	0	0	0	0	0	0	0	0
23/02/2006 12:00:00	0	0	0	0	0	0	0	0	0	0	0	0	0
23/02/2006 13:00:00	0	0	0	0	0	0	0	0	0	0	0	0	0
23/02/2006 14:00:00	0	0	0	0	0	0	0	0	0	0	0	0	0
23/02/2006 15:00:00	0	0	0	0	0	0	0	0	0	0	0	0	0
23/02/2006 16:00:00	0	0	0	0	0	0	0	0	0	0	0	0	0
23/02/2006 17:00:00	0	0	0	0	0	0	0	0	0	0	0	0	0
23/02/2006 18:00:00	0	0	0	0	0	0	0	0	0	0	0	0	0
23/02/2006 19:00:00	0	0	0	0	0	0	0	0	0	0	0	0	0
23/02/2006 20:00:00	0	0	0	0	0	0	0	0	0	0	0	0	0
23/02/2006 21:00:00	0	0	0	0	0	0	0	0	0	0	0	0	0
23/02/2006 22:00:00	0	0	0	0	0	0	0	0	0	0	0	0	0
23/02/2006 23:00:00	0	0	0	0	0	0	0	0	0	0	0	0	0
24/02/2006 00:00:00	0	0	0	0	0	0	0	0	0	0	0	0	0.0125
24/02/2006 01:00:00	0	0	0	0	0	0	0	0	0	0	0	0	0.0125
24/02/2006 02:00:00	0	0	0	0	0	0	0	0	0	0	0	0	0.0125
24/02/2006 03:00:00	0	0	0	0	0	0	0	0	0	0	0	0	0.0125
24/02/2006 04:00:00	0	0	0	0	0	0	0	0	0	0	0	0	0.0125
24/02/2006 05:00:00	0	0	0	0	0	0	0	0	0	0	0	0	0.0125
24/02/2006 06:00:00	0	0	0	0	0	0	0	0	0	0	0	0	0.0125
24/02/2006 07:00:00	0	0	0	0	0	0	0	0	0	0	0	0	0.0125
24/02/2006 08:00:00	0	0	0	0	0	0	0	0	0	0	0	0	0.0125
24/02/2006 09:00:00	0	0	0	0	0	0	0	0	0	0	0	0	0.0125
24/02/2006 10:00:00	0	0	0	0	0	0	0	0	0	0	0	0	0.0125
24/02/2006 11:00:00	0	0	0	0	0	0	0	0	0	0	0	0	0.0125
24/02/2006 12:00:00	0	0	0	0	0	0	0	0	0	0	0	0	0.0125
24/02/2006 13:00:00	0	0	0	0	0	0	0	0	0	0	0	0	0.0125
24/02/2006 14:00:00	0	0	0	0	0	0	0	0	0	0	0	0	0.0125
24/02/2006 15:00:00	0	0	0	0	0	0	0	0	0	0	0	0	0.0125
24/02/2006 16:00:00	0	0	0	0	0	0	0	0	0	0	0	0	0.0125
24/02/2006 17:00:00	0	0	0	0	0	0	0	0	0	0	0	0	0.0125
24/02/2006 18:00:00	0	0	0	0	0	0	0	0	0	0	0	0	0.0125
24/02/2006 19:00:00	0	0	0	0	0	0	0	0	0	0	0	0	0.0125
24/02/2006 20:00:00	0	0	0	0	0	0	0	0	0	0	0	0	0.0125
24/02/2006 21:00:00	0	0	0	0	0	0	0	0	0	0	0	0	0.0125
24/02/2006 22:00:00	0	0	0	0	0	0	0	0	0	0	0	0	0.0125
24/02/2006 23:00:00	0	0	0	0	0	0	0	0	0	0	0	0	0.0125
25/02/2006 00:00:00	0	0	0	0	0	0	0	0	0	0	0	0	0
25/02/2006 01:00:00	0	0	0	0	0	0	0	0	0	0	0	0	0
25/02/2006 02:00:00	0	0	0	0	0	0	0	0	0	0	0	0	0
25/02/2006 03:00:00	0	0	0	0	0	0	0	0	0	0	0	0	0
25/02/2006 04:00:00	0	0	0	0	0	0	0	0	0	0	0	0	0
25/02/2006 05:00:00	0	0	0	0	0	0	0	0	0	0	0	0	0
25/02/2006 06:00:00	0	0	0	0	0	0	0	0	0	0	0	0	0
25/02/2006 07:00:00	0	0	0	0	0	0	0	0	0	0	0	0	0
25/02/2006 08:00:00	0	0	0	0	0	0	0	0	0	0	0	0	0
25/02/2006 09:00:00	0	0	0	0	0	0	0	0	0	0	0	0	0
25/02/2006 10:00:00	0	0	0	0	0	0	0	0	0	0	0	0	0
25/02/2006 11:00:00	0	0	0	0	0	0	0	0	0	0	0	0	0
25/02/2006 12:00:00	0	0	0	0	0	0	0	0	0	0	0	0	0
25/02/2006 13:00:00	0	0	0	0	0	0	0	0	0	0	0	0	0
25/02/2006 14:00:00	0	0	0	0	0	0	0	0	0	0	0	0	0
25/02/2006 15:00:00	0	0	0	0	0	0	0	0	0	0	0	0	0
25/02/2006 16:00:00	0	0	0	0	0	0	0	0	0	0	0	0	0
25/02/2006 17:00:00	0	0	0	0	0	0	0	0	0	0	0	0	0
25/02/2006 18:00:00	0	0	0	0	0	0	0	0	0	0	0	0	0
25/02/2006 19:00:00	0	0	0	0	0	0	0	0	0	0	0	0	0
25/02/2006 20:00:00	0	0	0	0	0	0	0	0	0	0	0	0	0
25/02/2006 21:00:00	0	0	0	0	0	0	0	0	0	0	0	0	0
25/02/2006 22:00:00	0	0	0	0	0	0	0	0	0	0	0	0	0
25/02/2006 23:00:00	0	0	0	0	0	0	0	0	0	0	0	0	0
26/02/2006 00:00:00	0	0	0	0	0	0	0	0.004166667	0.133333333	0.091666667	0.020833333	0	0.025
26/02/2006 01:00:00	0	0	0	0	0	0	0	0.004166667	0.133333333	0.091666667	0.020833333	0	0.025
26/02/2006 02:00:00	0	0	0	0	0	0	0	0.004166667	0.133333333	0.091666667	0.020833333	0	0.025
26/02/2006 03:00:00	0	0	0	0	0	0	0	0.004166667	0.133333333	0.091666667	0.020833333	0	0.025
26/02/2006 04:00:00	0	0	0	0	0	0	0	0.004166667	0.133333333	0.091666667	0.020833333	0	0.025
26/02/2006 05:00:00	0	0	0	0	0	0	0	0.004166667	0.133333333	0.091666667	0.020833333	0	0.025
26/02/2006 06:00:00	0	0	0	0	0	0	0	0.004166667	0.133333333	0.091666667	0.020833333	0	0.025
26/02/2006 07:00:00	0	0	0	0	0	0	0	0.004166667	0.133333333	0.091666667	0.020833333	0	0.025
26/02/2006 08:00:00	0	0	0	0	0	0	0	0.004166667	0.133333333	0.091666667	0.020833333	0	0.025
26/02/2006 09:00:00	0	0	0	0	0	0	0	0.004166667	0.133333333	0.091666667	0.020833333	0	0.025
26/02/2006 10:00:00	0	0	0	0	0	0	0	0.004166667	0.133333333	0.091666667	0.020833333	0	0.025
26/02/2006 11:00:00	0	0	0	0	0	0	0	0.004166667	0.133333333	0.091666667	0.020833333	0	0.025
26/02/2006 12:00:00	0	0	0	0	0	0	0	0.004166667	0.133333333	0.091666667	0.020833333	0	0.025
26/02/2006 13:00:00	0	0	0	0	0	0	0	0.004166667	0.133333333	0.091666667	0.020833333	0	0.025
26/02/2006 14:00:00	0	0	0	0	0	0	0	0.004166667	0.133333333	0.091666667	0.020833333	0	0.025
26/02/2006 15:00:00	0	0	0	0	0	0	0	0.004166667	0.133333333	0.091666667	0.020833333	0	0.025
26/02/2006 16:00:00	0	0	0	0	0	0	0	0.004166667	0.133333333	0.091666667	0.020833333	0	0.025
26/02/2006 17:00:00	0	0	0	0	0	0	0	0.004166667	0.133333333	0.091666667	0.020833333	0	0.025
26/02/2006 18:00:00	0	0	0	0	0	0	0	0.004166667	0.133333333	0.091666667	0.020833333	0	0.025
26/02/2006 19:00:00	0	0	0	0	0	0	0	0.004166667	0.133333333	0.091666667	0.020833333	0	0.025
26/02/2006 20:00:00	0	0	0	0	0	0	0	0.004166667	0.133333333	0.091666667	0.020833333	0	0.025
26/02/2006 21:00:00	0	0	0	0	0	0	0	0.004166667	0.133333333	0.091666667	0.020833333	0	0.025
26/02/2006 22:00:00	0	0	0	0	0	0	0	0.004166667	0.133333333	0.091666667	0.020833333	0	0.025
26/02/2006 23:00:00	0	0	0	0	0	0	0	0.004166667	0.133333333	0.091666667	0.020833333	0	0.025
27/02/2006 00:00:00	0.1875	0.1375	0.254166667	0.125	0.191666667	0.220833333	0.2	0.308333333	0.633333333	0.404166667	0.179166667	0.5625	0.529166667
27/02/2006 01:00:00	0.1875	0.1375	0.254166667	0.125	0.191666667	0.220833333	0.2	0.308333333	0.633333333	0.404166667	0.179166667	0.5625	0.529166667
27/02/2006 02:00:00	0.1875	0.1375	0.254166667	0.125	0.191666667	0.220833333	0.2	0.308333333	0.633333333	0.404166667	0.179166667	0.5625	0.529166667
27/02/2006 03:00:00	0.1875	0.1375	0.254166667	0.125	0.191666667	0.220833333	0.2	0.308333333	0.633333333	0.404166667	0.179166667	0.5625	0.529166667
27/02/2006 04:00:00	0.1875	0.1375	0.254166667	0.125	0.191666667	0.220833333	0.2	0.308333333	0.633333333	0.404166667	0.179166667	0.5625	0.529166667
27/02/2006 05:00:00	0.1875	0.1375	0.254166667	0.125	0.191666667	0.220833333	0.2	0.308333333	0.633333333	0.404166667	0.179166667	0.5625	0.529166667
27/02/2006 06:00:00	0.1875	0.1375	0.254166667	0.125	0.191666667	0.220833333	0.2	0.308333333	0.633333333	0.404166667	0.179166667	0.5625	0.529166667
27/02/2006 07:00:00	0.1875	0.1375	0.254166667	0.125	0.191666667	0.220833333	0.2	0.308333333	0.633333333	0.404166667	0.179166667	0.5625	0.529166667
27/02/2006 08:00:00	0.1875	0.1375	0.254166667	0.125	0.191666667	0.220833333	0.2	0.308333333	0.633333333	0.404166667	0.179166667	0.5625	0.529166667
27/02/2006 09:00:00	0.1875	0.1375	0.254166667	0.125	0.191666667	0.220833333	0.2	0.308333333	0.633333333	0.404166667	0.179166667	0.5625	0.529166667
27/02/2006 10:00:00	0.1875	0.1375	0.254166667	0.125	0.191666667	0.220833333	0.2	0.308333333	0.633333333	0.404166667	0.179166667	0.5625	0.529166667
27/02/2006 11:00:00	0.1875	0.1375	0.254166667	0.125	0.191666667	0.220833333	0.2	0.308333333	0.633333333	0.404166667	0.179166667	0.5625	0.529166667
27/02/2006 12:00:00	0.1875	0.1375	0.254166667	0.125	0.191666667	0.220833333	0.2	0.308333333	0.633333333	0.404166667	0.179166667	0.5625	0.529166667
27/02/2006 13:00:00	0.1875	0.1375	0.254166667	0.125	0.191666667	0.220833333	0.2	0.308333333	0.633333333	0.404166667	0.179166667	0.5625	0.529166667
27/02/2006 14:00:00	0.1875	0.1375	0.254166667	0.125	0.191666667	0.220833333	0.2	0.308333333	0.633333333	0.404166667	0.179166667	0.5625	0.529166667
27/02/2006 15:00:00	0.1875	0.1375	0.254166667	0.125	0.191666667	0.220833333	0.2	0.308333333	0.633333333	0.404166667	0.179166667	0.5625	0.529166667
27/02/2006 16:00:00	0.1875	0.1375	0.254166667	0.125	0.191666667	0.220833333	0.2	0.308333333	0.633333333	0.404166667	0.179166667	0.5625	0.529166667
27/02/2006 17:00:00	0.1875	0.1375	0.254166667	0.125	0.191666667	0.220833333	0.2	0.308333333	0.633333333	0.404166667	0.179166667	0.5625	0.529166667
27/02/2006 18:00:00	0.1875	0.1375	0.254166667	0.125	0.191666667	0.220833333	0.2	0.308333333	0.633333333	0.404166667	0.179166667	0.5625	0.529166667
27/02/2006 19:00:00	0.1875	0.1375	0.254166667	0.125	0.191666667	0.220833333	0.2	0.308333333	0.633333333	0.404166667	0.179166667	0.5625	0.529166667
27/02/2006 20:00:00	0.1875	0.1375	0.254166667	0.125	0.191666667	0.220833333	0.2	0.308333333	0.633333333	0.404166667	0.179166667	0.5625	0.529166667
27/02/2006 21:00:00	0.1875	0.1375	0.254166667	0.125	0.191666667	0.220833333	0.2	0.308333333	0.633333333	0.404166667	0.179166667	0.5625	0.529166667
27/02/2006 22:00:00	0.1875	0.1375	0.254166667	0.125	0.191666667	0.220833333	0.2	0.308333333	0.633333333	0.404166667	0.179166667	0.5625	0.529166667
27/02/2006 23:00:00	0.1875	0.1375	0.254166667	0.125	0.191666667	0.220833333	0.2	0.308333333	0.633333333	0.404166667	0.179166667	0.5625	0.529166667
28/02/2006 00:00:00	0	0	0	0	0	0	0	0	0	0	0.0125	0	0.05
28/02/2006 01:00:00	0	0	0	0	0	0	0	0	0	0	0.0125	0	0.05
28/02/2006 02:00:00	0	0	0	0	0	0	0	0	0	0	0.0125	0	0.05
28/02/2006 03:00:00	0	0	0	0	0	0	0	0	0	0	0.0125	0	0.05
28/02/2006 04:00:00	0	0	0	0	0	0	0	0	0	0	0.0125	0	0.05
28/02/2006 05:00:00	0	0	0	0	0	0	0	0	0	0	0.0125	0	0.05
28/02/2006 06:00:00	0	0	0	0	0	0	0	0	0	0	0.0125	0	0.05
28/02/2006 07:00:00	0	0	0	0	0	0	0	0	0	0	0.0125	0	0.05
28/02/2006 08:00:00	0	0	0	0	0	0	0	0	0	0	0.0125	0	0.05
28/02/2006 09:00:00	0	0	0	0	0	0	0	0	0	0	0.0125	0	0.05
28/02/2006 10:00:00	0	0	0	0	0	0	0	0	0	0	0.0125	0	0.05
28/02/2006 11:00:00	0	0	0	0	0	0	0	0	0	0	0.0125	0	0.05
28/02/2006 12:00:00	0	0	0	0	0	0	0	0	0	0	0.0125	0	0.05
28/02/2006 13:00:00	0	0	0	0	0	0	0	0	0	0	0.0125	0	0.05
28/02/2006 14:00:00	0	0	0	0	0	0	0	0	0	0	0.0125	0	0.05
28/02/2006 15:00:00	0	0	0	0	0	0	0	0	0	0	0.0125	0	0.05
28/02/2006 16:00:00	0	0	0	0	0	0	0	0	0	0	0.0125	0	0.05
28/02/2006 17:00:00	0	0	0	0	0	0	0	0	0	0	0.0125	0	0.05
28/02/2006 18:00:00	0	0	0	0	0	0	0	0	0	0	0.0125	0	0.05
28/02/2006 19:00:00	0	0	0	0	0	0	0	0	0	0	0.0125	0	0.05
28/02/2006 20:00:00	0	0	0	0	0	0	0	0	0	0	0.0125	0	0.05
28/02/2006 21:00:00	0	0	0	0	0	0	0	0	0	0	0.0125	0	0.05
28/02/2006 22:00:00	0	0	0	0	0	0	0	0	0	0	0.0125	0	0.05
28/02/2006 23:00:00	0	0	0	0	0	0	0	0	0	0	0.0125	0	0.05
01/03/2006 00:00:00	0	0	0	0	0	0	0	0	0	0	0	0	0
01/03/2006 01:00:00	0	0	0	0	0	0	0	0	0	0	0	0	0
01/03/2006 02:00:00	0	0	0	0	0	0	0	0	0	0	0	0	0
01/03/2006 03:00:00	0	0	0	0	0	0	0	0	0	0	0	0	0
01/03/2006 04:00:00	0	0	0	0	0	0	0	0	0	0	0	0	0
01/03/2006 05:00:00	0	0	0	0	0	0	0	0	0	0	0	0	0
01/03/2006 06:00:00	0	0	0	0	0	0	0	0	0	0	0	0	0
01/03/2006 07:00:00	0	0	0	0	0	0	0	0	0	0	0	0	0
01/03/2006 08:00:00	0	0	0	0	0	0	0	0	0	0	0	0	0
01/03/2006 09:00:00	0	0	0	0	0	0	0	0	0	0	0	0	0
01/03/2006 10:00:00	0	0	0	0	0	0	0	0	0	0	0	0	0
01/03/2006 11:00:00	0	0	0	0	0	0	0	0	0	0	0	0	0
01/03/2006 12:00:00	0	0	0	0	0	0	0	0	0	0	0	0	0
01/03/2006 13:00:00	0	0	0	0	0	0	0	0	0	0	0	0	0
01/03/2006 14:00:00	0	0	0	0	0	0	0	0	0	0	0	0	0
01/03/2006 15:00:00	0	0	0	0	0	0	0	0	0	0	0	0	0
01/03/2006 16:00:00	0	0	0	0	0	0	0	0	0	0	0	0	0
01/03/2006 17:00:00	0	0	0	0	0	0	0	0	0	0	0	0	0
01/03/2006 18:00:00	0	0	0	0	0	0	0	0	0	0	0	0	0
01/03/2006 19:00:00	0	0	0	0	0	0	0	0	0	0	0	0	0
01/03/2006 20:00:00	0	0	0	0	0	0	0	0	0	0	0	0	0
01/03/2006 21:00:00	0	0	0	0	0	0	0	0	0	0	0	0	0
01/03/2006 22:00:00	0	0	0	0	0	0	0	0	0	0	0	0	0
01/03/2006 23:00:00	0	0	0	0	0	0	0	0	0	0	0	0	0
02/03/2006 00:00:00	0	0	0	0	0	0	0	0	0	0	0	0	0
02/03/2006 01:00:00	0	0	0	0	0	0	0	0	0	0	0	0	0
02/03/2006 02:00:00	0	0	0	0	0	0	0	0	0	0	0	0	0
02/03/2006 03:00:00	0	0	0	0	0	0	0	0	0	0	0	0	0
02/03/2006 04:00:00	0	0	0	0	0	0	0	0	0	0	0	0	0
02/03/2006 05:00:00	0	0	0	0	0	0	0	0	0	0	0	0	0
02/03/2006 06:00:00	0	0	0	0	0	0	0	0	0	0	0	0	0
02/03/2006 07:00:00	0	0	0	0	0	0	0	0	0	0	0	0	0
02/03/2006 08:00:00	0	0	0	0	0	0	0	0	0	0	0	0	0
02/03/2006 09:00:00	0	0	0	0	0	0	0	0	0	0	0	0	0
02/03/2006 10:00:00	0	0	0	0	0	0	0	0	0	0	0	0	0
02/03/2006 11:00:00	0	0	0	0	0	0	0	0	0	0	0	0	0
02/03/2006 12:00:00	0	0	0	0	0	0	0	0	0	0	0	0	0
02/03/2006 13:00:00	0	0	0	0	0	0	0	0	0	0	0	0	0
02/03/2006 14:00:00	0	0	0	0	0	0	0	0	0	0	0	0	0
02/03/2006 15:00:00	0	0	0	0	0	0	0	0	0	0	0	0	0
02/03/2006 16:00:00	0	0	0	0	0	0	0	0	0	0	0	0	0
02/03/2006 17:00:00	0	0	0	0	0	0	0	0	0	0	0	0	0
02/03/2006 18:00:00	0	0	0	0	0	0	0	0	0	0	0	0	0
02/03/2006 19:00:00	0	0	0	0	0	0	0	0	0	0	0	0	0
02/03/2006 20:00:00	0	0	0	0	0	0	0	0	0	0	0	0	0
02/03/2006 21:00:00	0	0	0	0	0	0	0	0	0	0	0	0	0
02/03/2006 22:00:00	0	0	0	0	0	0	0	0	0	0	0	0	0
02/03/2006 23:00:00	0	0	0	0	0	0	0	0	0	0	0	0	0
03/03/2006 00:00:00	0	0	0	0	0	0	0	0	0	0	0	0	0
03/03/2006 01:00:00	0	0	0	0	0	0	0	0	0	0	0	0	0
03/03/2006 02:00:00	0	0	0	0	0	0	0	0	0	0	0	0	0
03/03/2006 03:00:00	0	0	0	0	0	0	0	0	0	0	0	0	0
03/03/2006 04:00:00	0	0	0	0	0	0	0	0	0	0	0	0	0
03/03/2006 05:00:00	0	0	0	0	0	0	0	0	0	0	0	0	0
03/03/2006 06:00:00	0	0	0	0	0	0	0	0	0	0	0	0	0
03/03/2006 07:00:00	0	0	0	0	0	0	0	0	0	0	0	0	0
03/03/2006 08:00:00	0	0	0	0	0	0	0	0	0	0	0	0	0
03/03/2006 09:00:00	0	0	0	0	0	0	0	0	0	0	0	0	0
03/03/2006 10:00:00	0	0	0	0	0	0	0	0	0	0	0	0	0
03/03/2006 11:00:00	0	0	0	0	0	0	0	0	0	0	0	0	0
03/03/2006 12:00:00	0	0	0	0	0	0	0	0	0	0	0	0	0
03/03/2006 13:00:00	0	0	0	0	0	0	0	0	0	0	0	0	0
03/03/2006 14:00:00	0	0	0	0	0	0	0	0	0	0	0	0	0
03/03/2006 15:00:00	0	0	0	0	0	0	0	0	0	0	0	0	0
03/03/2006 16:00:00	0	0	0	0	0	0	0	0	0	0	0	0	0
03/03/2006 17:00:00	0	0	0	0	0	0	0	0	0	0	0	0	0
03/03/2006 18:00:00	0	0	0	0	0	0	0	0	0	0	0	0	0
03/03/2006 19:00:00	0	0	0	0	0	0	0	0	0	0	0	0	0
03/03/2006 20:00:00	0	0	0	0	0	0	0	0	0	0	0	0	0
03/03/2006 21:00:00	0	0	0	0	0	0	0	0	0	0	0	0	0
03/03/2006 22:00:00	0	0	0	0	0	0	0	0	0	0	0	0	0
03/03/2006 23:00:00	0	0	0	0	0	0	0	0	0	0	0	0	0
04/03/2006 00:00:00	0	0	0	0	0	0	0	0	0	0	0	0	0
04/03/2006 01:00:00	0	0	0	0	0	0	0	0	0	0	0	0	0
04/03/2006 02:00:00	0	0	0	0	0	0	0	0	0	0	0	0	0
04/03/2006 03:00:00	0	0	0	0	0	0	0	0	0	0	0	0	0
04/03/2006 04:00:00	0	0	0	0	0	0	0	0	0	0	0	0	0
04/03/2006 05:00:00	0	0	0	0	0	0	0	0	0	0	0	0	0
04/03/2006 06:00:00	0	0	0	0	0	0	0	0	0	0	0	0	0
04/03/2006 07:00:00	0	0	0	0	0	0	0	0	0	0	0	0	0
04/03/2006 08:00:00	0	0	0	0	0	0	0	0	0	0	0	0	0
04/03/2006 09:00:00	0	0	0	0	0	0	0	0	0	0	0	0	0
04/03/2006 10:00:00	0	0	0	0	0	0	0	0	0	0	0	0	0
04/03/2006 11:00:00	0	0	0	0	0	0	0	0	0	0	0	0	0
04/03/2006 12:00:00	0	0	0	0	0	0	0	0	0	0	0	0	0
04/03/2006 13:00:00	0	0	0	0	0	0	0	0	0	0	0	0	0
04/03/2006 14:00:00	0	0	0	0	0	0	0	0	0	0	0	0	0
04/03/2006 15:00:00	0	0	0	0	0	0	0	0	0	0	0	0	0
04/03/2006 16:00:00	0	0	0	0	0	0	0	0	0	0	0	0	0
04/03/2006 17:00:00	0	0	0	0	0	0	0	0	0	0	0	0	0
04/03/2006 18:00:00	0	0	0	0	0	0	0	0	0	0	0	0	0
04/03/2006 19:00:00	0	0	0	0	0	0	0	0	0	0	0	0	0
04/03/2006 20:00:00	0	0	0	0	0	0	0	0	0	0	0	0	0
04/03/2006 21:00:00	0	0	0	0	0	0	0	0	0	0	0	0	0
04/03/2006 22:00:00	0	0	0	0	0	0	0	0	0	0	0	0	0
04/03/2006 23:00:00	0	0	0	0	0	0	0	0	0	0	0	0	0
05/03/2006 00:00:00	0	0	0	0	0	0	0	0	0	0	0	0	0
05/03/2006 01:00:00	0	0	0	0	0	0	0	0	0	0	0	0	0
05/03/2006 02:00:00	0	0	0	0	0	0	0	0	0	0	0	0	0
05/03/2006 03:00:00	0	0	0	0	0	0	0	0	0	0	0	0	0
05/03/2006 04:00:00	0	0	0	0	0	0	0	0	0	0	0	0	0
05/03/2006 05:00:00	0	0	0	0	0	0	0	0	0	0	0	0	0
05/03/2006 06:00:00	0	0	0	0	0	0	0	0	0	0	0	0	0
05/03/2006 07:00:00	0	0	0	0	0	0	0	0	0	0	0	0	0
05/03/2006 08:00:00	0	0	0	0	0	0	0	0	0	0	0	0	0
05/03/2006 09:00:00	0	0	0	0	0	0	0	0	0	0	0	0	0
05/03/2006 10:00:00	0	0	0	0	0	0	0	0	0	0	0	0	0
05/03/2006 11:00:00	0	0	0	0	0	0	0	0	0	0	0	0	0
05/03/2006 12:00:00	0	0	0	0	0	0	0	0	0	0	0	0	0
05/03/2006 13:00:00	0	0	0	0	0	0	0	0	0	0	0	0	0
05/03/2006 14:00:00	0	0	0	0	0	0	0	0	0	0	0	0	0
05/03/2006 15:00:00	0	0	0	0	0	0	0	0	0	0	0	0	0
05/03/2006 16:00:00	0	0	0	0	0	0	0	0	0	0	0	0	0
05/03/2006 17:00:00	0	0	0	0	0	0	0	0	0	0	0	0	0
05/03/2006 18:00:00	0	0	0	0	0	0	0	0	0	0	0	0	0
05/03/2006 19:00:00	0	0	0	0	0	0	0	0	0	0	0	0	0
05/03/2006 20:00:00	0	0	0	0	0	0	0	0	0	0	0	0	0
05/03/2006 21:00:00	0	0	0	0	0	0	0	0	0	0	0	0	0
05/03/2006 22:00:00	0	0	0	0	0	0	0	0	0	0	0	0	0
05/03/2006 23:00:00	0	0	0	0	0	0	0	0	0	0	0	0	0
06/03/2006 00:00:00	0	0	0	0	0	0	0	0	0	0	0	0	0
06/03/2006 01:00:00	0	0	0	0	0	0	0	0	0	0	0	0	0
06/03/2006 02:00:00	0	0	0	0	0	0	0	0	0	0	0	0	0
06/03/2006 03:00:00	0	0	0	0	0	0	0	0	0	0	0	0	0
06/03/2006 04:00:00	0	0	0	0	0	0	0	0	0	0	0	0	0
06/03/2006 05:00:00	0	0	0	0	0	0	0	0	0	0	0	0	0
06/03/2006 06:00:00	0	0	0	0	0	0	0	0	0	0	0	0	0
06/03/2006 07:00:00	0	0	0	0	0	0	0	0	0	0	0	0	0
06/03/2006 08:00:00	0	0	0	0	0	0	0	0	0	0	0	0	0
06/03/2006 09:00:00	0	0	0	0	0	0	0	0	0	0	0	0	0
06/03/2006 10:00:00	0	0	0	0	0	0	0	0	0	0	0	0	0
06/03/2006 11:00:00	0	0	0	0	0	0	0	0	0	0	0	0	0
06/03/2006 12:00:00	0	0	0	0	0	0	0	0	0	0	0	0	0
06/03/2006 13:00:00	0	0	0	0	0	0	0	0	0	0	0	0	0
06/03/2006 14:00:00	0	0	0	0	0	0	0	0	0	0	0	0	0
06/03/2006 15:00:00	0	0	0	0	0	0	0	0	0	0	0	0	0
06/03/2006 16:00:00	0	0	0	0	0	0	0	0	0	0	0	0	0
06/03/2006 17:00:00	0	0	0	0	0	0	0	0	0	0	0	0	0
06/03/2006 18:00:00	0	0	0	0	0	0	0	0	0	0	0	0	0
06/03/2006 19:00:00	0	0	0	0	0	0	0	0	0	0	0	0	0
06/03/2006 20:00:00	0	0	0	0	0	0	0	0	0	0	0	0	0
06/03/2006 21:00:00	0	0	0	0	0	0	0	0	0	0	0	0	0
06/03/2006 22:00:00	0	0	0	0	0	0	0	0	0	0	0	0	0
06/03/2006 23:00:00	0	0	0	0	0	0	0	0	0	0	0	0	0
07/03/2006 00:00:00	0	0	0	0	0	0	0	0	0	0	0	0	0
07/03/2006 01:00:00	0	0	0	0	0	0	0	0	0	0	0	0	0
07/03/2006 02:00:00	0	0	0	0	0	0	0	0	0	0	0	0	0
07/03/2006 03:00:00	0	0	0	0	0	0	0	0	0	0	0	0	0
07/03/2006 04:00:00	0	0	0	0	0	0	0	0	0	0	0	0	0
07/03/2006 05:00:00	0	0	0	0	0	0	0	0	0	0	0	0	0
07/03/2006 06:00:00	0	0	0	0	0	0	0	0	0	0	0	0	0
07/03/2006 07:00:00	0	0	0	0	0	0	0	0	0	0	0	0	0
07/03/2006 08:00:00	0	0	0	0	0	0	0	0	0	0	0	0	0
07/03/2006 09:00:00	0	0	0	0	0	0	0	0	0	0	0	0	0
07/03/2006 10:00:00	0	0	0	0	0	0	0	0	0	0	0	0	0
07/03/2006 11:00:00	0	0	0	0	0	0	0	0	0	0	0	0	0
07/03/2006 12:00:00	0	0	0	0	0	0	0	0	0	0	0	0	0
07/03/2006 13:00:00	0	0	0	0	0	0	0	0	0	0	0	0	0
07/03/2006 14:00:00	0	0	0	0	0	0	0	0	0	0	0	0	0
07/03/2006 15:00:00	0	0	0	0	0	0	0	0	0	0	0	0	0
07/03/2006 16:00:00	0	0	0	0	0	0	0	0	0	0	0	0	0
07/03/2006 17:00:00	0	0	0	0	0	0	0	0	0	0	0	0	0
07/03/2006 18:00:00	0	0	0	0	0	0	0	0	0	0	0	0	0
07/03/2006 19:00:00	0	0	0	0	0	0	0	0	0	0	0	0	0
07/03/2006 20:00:00	0	0	0	0	0	0	0	0	0	0	0	0	0
07/03/2006 21:00:00	0	0	0	0	0	0	0	0	0	0	0	0	0
07/03/2006 22:00:00	0	0	0	0	0	0	0	0	0	0	0	0	0
07/03/2006 23:00:00	0	0	0	0	0	0	0	0	0	0	0	0	0
08/03/2006 00:00:00	0.0625	0.070833333	0.0875	0.058333333	0.0125	0.125	0	0.004166667	0	0	0.0125	0	0
08/03/2006 01:00:00	0.0625	0.070833333	0.0875	0.058333333	0.0125	0.125	0	0.004166667	0	0	0.0125	0	0
08/03/2006 02:00:00	0.0625	0.070833333	0.0875	0.058333333	0.0125	0.125	0	0.004166667	0	0	0.0125	0	0
08/03/2006 03:00:00	0.0625	0.070833333	0.0875	0.058333333	0.0125	0.125	0	0.004166667	0	0	0.0125	0	0
08/03/2006 04:00:00	0.0625	0.070833333	0.0875	0.058333333	0.0125	0.125	0	0.004166667	0	0	0.0125	0	0
08/03/2006 05:00:00	0.0625	0.070833333	0.0875	0.058333333	0.0125	0.125	0	0.004166667	0	0	0.0125	0	0
08/03/2006 06:00:00	0.0625	0.070833333	0.0875	0.058333333	0.0125	0.125	0	0.004166667	0	0	0.0125	0	0
08/03/2006 07:00:00	0.0625	0.070833333	0.0875	0.058333333	0.0125	0.125	0	0.004166667	0	0	0.0125	0	0
08/03/2006 08:00:00	0.0625	0.070833333	0.0875	0.058333333	0.0125	0.125	0	0.004166667	0	0	0.0125	0	0
08/03/2006 09:00:00	0.0625	0.070833333	0.0875	0.058333333	0.0125	0.125	0	0.004166667	0	0	0.0125	0	0
08/03/2006 10:00:00	0.0625	0.070833333	0.0875	0.058333333	0.0125	0.125	0	0.004166667	0	0	0.0125	0	0
08/03/2006 11:00:00	0.0625	0.070833333	0.0875	0.058333333	0.0125	0.125	0	0.004166667	0	0	0.0125	0	0
08/03/2006 12:00:00	0.0625	0.070833333	0.0875	0.058333333	0.0125	0.125	0	0.004166667	0	0	0.0125	0	0
08/03/2006 13:00:00	0.0625	0.070833333	0.0875	0.058333333	0.0125	0.125	0	0.004166667	0	0	0.0125	0	0
08/03/2006 14:00:00	0.0625	0.070833333	0.0875	0.058333333	0.0125	0.125	0	0.004166667	0	0	0.0125	0	0
08/03/2006 15:00:00	0.0625	0.070833333	0.0875	0.058333333	0.0125	0.125	0	0.004166667	0	0	0.0125	0	0
08/03/2006 16:00:00	0.0625	0.070833333	0.0875	0.058333333	0.0125	0.125	0	0.004166667	0	0	0.0125	0	0
08/03/2006 17:00:00	0.0625	0.070833333	0.0875	0.058333333	0.0125	0.125	0	0.004166667	0	0	0.0125	0	0
08/03/2006 18:00:00	0.0625	0.070833333	0.0875	0.058333333	0.0125	0.125	0	0.004166667	0	0	0.0125	0	0
08/03/2006 19:00:00	0.0625	0.070833333	0.0875	0.058333333	0.0125	0.125	0	0.004166667	0	0	0.0125	0	0
08/03/2006 20:00:00	0.0625	0.070833333	0.0875	0.058333333	0.0125	0.125	0	0.004166667	0	0	0.0125	0	0
08/03/2006 21:00:00	0.0625	0.070833333	0.0875	0.058333333	0.0125	0.125	0	0.004166667	0	0	0.0125	0	0
08/03/2006 22:00:00	0.0625	0.070833333	0.0875	0.058333333	0.0125	0.125	0	0.004166667	0	0	0.0125	0	0
08/03/2006 23:00:00	0.0625	0.070833333	0.0875	0.058333333	0.0125	0.125	0	0.004166667	0	0	0.0125	0	0
09/03/2006 00:00:00	0	0	0	0	0	0	0	0	0	0	0	0	0
09/03/2006 01:00:00	0	0	0	0	0	0	0	0	0	0	0	0	0
09/03/2006 02:00:00	0	0	0	0	0	0	0	0	0	0	0	0	0
09/03/2006 03:00:00	0	0	0	0	0	0	0	0	0	0	0	0	0
09/03/2006 04:00:00	0	0	0	0	0	0	0	0	0	0	0	0	0
09/03/2006 05:00:00	0	0	0	0	0	0	0	0	0	0	0	0	0
09/03/2006 06:00:00	0	0	0	0	0	0	0	0	0	0	0	0	0
09/03/2006 07:00:00	0	0	0	0	0	0	0	0	0	0	0	0	0
09/03/2006 08:00:00	0	0	0	0	0	0	0	0	0	0	0	0	0
09/03/2006 09:00:00	0	0	0	0	0	0	0	0	0	0	0	0	0
09/03/2006 10:00:00	0	0	0	0	0	0	0	0	0	0	0	0	0
09/03/2006 11:00:00	0	0	0	0	0	0	0	0	0	0	0	0	0
09/03/2006 12:00:00	0	0	0	0	0	0	0	0	0	0	0	0	0
09/03/2006 13:00:00	0	0	0	0	0	0	0	0	0	0	0	0	0
09/03/2006 14:00:00	0	0	0	0	0	0	0	0	0	0	0	0	0
09/03/2006 15:00:00	0	0	0	0	0	0	0	0	0	0	0	0	0
09/03/2006 16:00:00	0	0	0	0	0	0	0	0	0	0	0	0	0
09/03/2006 17:00:00	0	0	0	0	0	0	0	0	0	0	0	0	0
09/03/2006 18:00:00	0	0	0	0	0	0	0	0	0	0	0	0	0
09/03/2006 19:00:00	0	0	0	0	0	0	0	0	0	0	0	0	0
09/03/2006 20:00:00	0	0	0	0	0	0	0	0	0	0	0	0	0
09/03/2006 21:00:00	0	0	0	0	0	0	0	0	0	0	0	0	0
09/03/2006 22:00:00	0	0	0	0	0	0	0	0	0	0	0	0	0
09/03/2006 23:00:00	0	0	0	0	0	0	0	0	0	0	0	0	0
10/03/2006 00:00:00	0	0	0	0	0	0	0	0	0.0125	0	0	0	0.004166667
10/03/2006 01:00:00	0	0	0	0	0	0	0	0	0.0125	0	0	0	0.004166667
10/03/2006 02:00:00	0	0	0	0	0	0	0	0	0.0125	0	0	0	0.004166667
10/03/2006 03:00:00	0	0	0	0	0	0	0	0	0.0125	0	0	0	0.004166667
10/03/2006 04:00:00	0	0	0	0	0	0	0	0	0.0125	0	0	0	0.004166667
10/03/2006 05:00:00	0	0	0	0	0	0	0	0	0.0125	0	0	0	0.004166667
10/03/2006 06:00:00	0	0	0	0	0	0	0	0	0.0125	0	0	0	0.004166667
10/03/2006 07:00:00	0	0	0	0	0	0	0	0	0.0125	0	0	0	0.004166667
10/03/2006 08:00:00	0	0	0	0	0	0	0	0	0.0125	0	0	0	0.004166667
10/03/2006 09:00:00	0	0	0	0	0	0	0	0	0.0125	0	0	0	0.004166667
10/03/2006 10:00:00	0	0	0	0	0	0	0	0	0.0125	0	0	0	0.004166667
10/03/2006 11:00:00	0	0	0	0	0	0	0	0	0.0125	0	0	0	0.004166667
10/03/2006 12:00:00	0	0	0	0	0	0	0	0	0.0125	0	0	0	0.004166667
10/03/2006 13:00:00	0	0	0	0	0	0	0	0	0.0125	0	0	0	0.004166667
10/03/2006 14:00:00	0	0	0	0	0	0	0	0	0.0125	0	0	0	0.004166667
10/03/2006 15:00:00	0	0	0	0	0	0	0	0	0.0125	0	0	0	0.004166667
10/03/2006 16:00:00	0	0	0	0	0	0	0	0	0.0125	0	0	0	0.004166667
10/03/2006 17:00:00	0	0	0	0	0	0	0	0	0.0125	0	0	0	0.004166667
10/03/2006 18:00:00	0	0	0	0	0	0	0	0	0.0125	0	0	0	0.004166667
10/03/2006 19:00:00	0	0	0	0	0	0	0	0	0.0125	0	0	0	0.004166667
10/03/2006 20:00:00	0	0	0	0	0	0	0	0	0.0125	0	0	0	0.004166667
10/03/2006 21:00:00	0	0	0	0	0	0	0	0	0.0125	0	0	0	0.004166667
10/03/2006 22:00:00	0	0	0	0	0	0	0	0	0.0125	0	0	0	0.004166667
10/03/2006 23:00:00	0	0	0	0	0	0	0	0	0.0125	0	0	0	0.004166667
11/03/2006 00:00:00	0	0	0	0	0	0	0.158333333	0.129166667	0.3125	0.245833333	0.170833333	0.116666667	0.541666667
11/03/2006 01:00:00	0	0	0	0	0	0	0.158333333	0.129166667	0.3125	0.245833333	0.170833333	0.116666667	0.541666667
11/03/2006 02:00:00	0	0	0	0	0	0	0.158333333	0.129166667	0.3125	0.245833333	0.170833333	0.116666667	0.541666667
11/03/2006 03:00:00	0	0	0	0	0	0	0.158333333	0.129166667	0.3125	0.245833333	0.170833333	0.116666667	0.541666667
11/03/2006 04:00:00	0	0	0	0	0	0	0.158333333	0.129166667	0.3125	0.245833333	0.170833333	0.116666667	0.541666667
11/03/2006 05:00:00	0	0	0	0	0	0	0.158333333	0.129166667	0.3125	0.245833333	0.170833333	0.116666667	0.541666667
11/03/2006 06:00:00	0	0	0	0	0	0	0.158333333	0.129166667	0.3125	0.245833333	0.170833333	0.116666667	0.541666667
11/03/2006 07:00:00	0	0	0	0	0	0	0.158333333	0.129166667	0.3125	0.245833333	0.170833333	0.116666667	0.541666667
11/03/2006 08:00:00	0	0	0	0	0	0	0.158333333	0.129166667	0.3125	0.245833333	0.170833333	0.116666667	0.541666667
11/03/2006 09:00:00	0	0	0	0	0	0	0.158333333	0.129166667	0.3125	0.245833333	0.170833333	0.116666667	0.541666667
11/03/2006 10:00:00	0	0	0	0	0	0	0.158333333	0.129166667	0.3125	0.245833333	0.170833333	0.116666667	0.541666667
11/03/2006 11:00:00	0	0	0	0	0	0	0.158333333	0.129166667	0.3125	0.245833333	0.170833333	0.116666667	0.541666667
11/03/2006 12:00:00	0	0	0	0	0	0	0.158333333	0.129166667	0.3125	0.245833333	0.170833333	0.116666667	0.541666667
11/03/2006 13:00:00	0	0	0	0	0	0	0.158333333	0.129166667	0.3125	0.245833333	0.170833333	0.116666667	0.541666667
11/03/2006 14:00:00	0	0	0	0	0	0	0.158333333	0.129166667	0.3125	0.245833333	0.170833333	0.116666667	0.541666667
11/03/2006 15:00:00	0	0	0	0	0	0	0.158333333	0.129166667	0.3125	0.245833333	0.170833333	0.116666667	0.541666667
11/03/2006 16:00:00	0	0	0	0	0	0	0.158333333	0.129166667	0.3125	0.245833333	0.170833333	0.116666667	0.541666667
11/03/2006 17:00:00	0	0	0	0	0	0	0.158333333	0.129166667	0.3125	0.245833333	0.170833333	0.116666667	0.541666667
11/03/2006 18:00:00	0	0	0	0	0	0	0.158333333	0.129166667	0.3125	0.245833333	0.170833333	0.116666667	0.541666667
11/03/2006 19:00:00	0	0	0	0	0	0	0.158333333	0.129166667	0.3125	0.245833333	0.170833333	0.116666667	0.541666667
11/03/2006 20:00:00	0	0	0	0	0	0	0.158333333	0.129166667	0.3125	0.245833333	0.170833333	0.116666667	0.541666667
11/03/2006 21:00:00	0	0	0	0	0	0	0.158333333	0.129166667	0.3125	0.245833333	0.170833333	0.116666667	0.541666667
11/03/2006 22:00:00	0	0	0	0	0	0	0.158333333	0.129166667	0.3125	0.245833333	0.170833333	0.116666667	0.541666667
11/03/2006 23:00:00	0	0	0	0	0	0	0.158333333	0.129166667	0.3125	0.245833333	0.170833333	0.116666667	0.541666667
12/03/2006 00:00:00	0	0	0	0	0	0	0	0	0	0	0	0	0
12/03/2006 01:00:00	0	0	0	0	0	0	0	0	0	0	0	0	0
12/03/2006 02:00:00	0	0	0	0	0	0	0	0	0	0	0	0	0
12/03/2006 03:00:00	0	0	0	0	0	0	0	0	0	0	0	0	0
12/03/2006 04:00:00	0	0	0	0	0	0	0	0	0	0	0	0	0
12/03/2006 05:00:00	0	0	0	0	0	0	0	0	0	0	0	0	0
12/03/2006 06:00:00	0	0	0	0	0	0	0	0	0	0	0	0	0
12/03/2006 07:00:00	0	0	0	0	0	0	0	0	0	0	0	0	0
12/03/2006 08:00:00	0	0	0	0	0	0	0	0	0	0	0	0	0
12/03/2006 09:00:00	0	0	0	0	0	0	0	0	0	0	0	0	0
12/03/2006 10:00:00	0	0	0	0	0	0	0	0	0	0	0	0	0
12/03/2006 11:00:00	0	0	0	0	0	0	0	0	0	0	0	0	0
12/03/2006 12:00:00	0	0	0	0	0	0	0	0	0	0	0	0	0
12/03/2006 13:00:00	0	0	0	0	0	0	0	0	0	0	0	0	0
12/03/2006 14:00:00	0	0	0	0	0	0	0	0	0	0	0	0	0
12/03/2006 15:00:00	0	0	0	0	0	0	0	0	0	0	0	0	0
12/03/2006 16:00:00	0	0	0	0	0	0	0	0	0	0	0	0	0
12/03/2006 17:00:00	0	0	0	0	0	0	0	0	0	0	0	0	0
12/03/2006 18:00:00	0	0	0	0	0	0	0	0	0	0	0	0	0
12/03/2006 19:00:00	0	0	0	0	0	0	0	0	0	0	0	0	0
12/03/2006 20:00:00	0	0	0	0	0	0	0	0	0	0	0	0	0
12/03/2006 21:00:00	0	0	0	0	0	0	0	0	0	0	0	0	0
12/03/2006 22:00:00	0	0	0	0	0	0	0	0	0	0	0	0	0
12/03/2006 23:00:00	0	0	0	0	0	0	0	0	0	0	0	0	0
13/03/2006 00:00:00	0	0	0	0	0	0	0	0	0	0	0	0	0
13/03/2006 01:00:00	0	0	0	0	0	0	0	0	0	0	0	0	0
13/03/2006 02:00:00	0	0	0	0	0	0	0	0	0	0	0	0	0
13/03/2006 03:00:00	0	0	0	0	0	0	0	0	0	0	0	0	0
13/03/2006 04:00:00	0	0	0	0	0	0	0	0	0	0	0	0	0
13/03/2006 05:00:00	0	0	0	0	0	0	0	0	0	0	0	0	0
13/03/2006 06:00:00	0	0	0	0	0	0	0	0	0	0	0	0	0
13/03/2006 07:00:00	0	0	0	0	0	0	0	0	0	0	0	0	0
13/03/2006 08:00:00	0	0	0	0	0	0	0	0	0	0	0	0	0
13/03/2006 09:00:00	0	0	0	0	0	0	0	0	0	0	0	0	0
13/03/2006 10:00:00	0	0	0	0	0	0	0	0	0	0	0	0	0
13/03/2006 11:00:00	0	0	0	0	0	0	0	0	0	0	0	0	0
13/03/2006 12:00:00	0	0	0	0	0	0	0	0	0	0	0	0	0
13/03/2006 13:00:00	0	0	0	0	0	0	0	0	0	0	0	0	0
13/03/2006 14:00:00	0	0	0	0	0	0	0	0	0	0	0	0	0
13/03/2006 15:00:00	0	0	0	0	0	0	0	0	0	0	0	0	0
13/03/2006 16:00:00	0	0	0	0	0	0	0	0	0	0	0	0	0
13/03/2006 17:00:00	0	0	0	0	0	0	0	0	0	0	0	0	0
13/03/2006 18:00:00	0	0	0	0	0	0	0	0	0	0	0	0	0
13/03/2006 19:00:00	0	0	0	0	0	0	0	0	0	0	0	0	0
13/03/2006 20:00:00	0	0	0	0	0	0	0	0	0	0	0	0	0
13/03/2006 21:00:00	0	0	0	0	0	0	0	0	0	0	0	0	0
13/03/2006 22:00:00	0	0	0	0	0	0	0	0	0	0	0	0	0
13/03/2006 23:00:00	0	0	0	0	0	0	0	0	0	0	0	0	0
14/03/2006 00:00:00	0	0	0	0	0	0	0	0	0	0	0	0	0
14/03/2006 01:00:00	0	0	0	0	0	0	0	0	0	0	0	0	0
14/03/2006 02:00:00	0	0	0	0	0	0	0	0	0	0	0	0	0
14/03/2006 03:00:00	0	0	0	0	0	0	0	0	0	0	0	0	0
14/03/2006 04:00:00	0	0	0	0	0	0	0	0	0	0	0	0	0
14/03/2006 05:00:00	0	0	0	0	0	0	0	0	0	0	0	0	0
14/03/2006 06:00:00	0	0	0	0	0	0	0	0	0	0	0	0	0
14/03/2006 07:00:00	0	0	0	0	0	0	0	0	0	0	0	0	0
14/03/2006 08:00:00	0	0	0	0	0	0	0	0	0	0	0	0	0
14/03/2006 09:00:00	0	0	0	0	0	0	0	0	0	0	0	0	0
14/03/2006 10:00:00	0	0	0	0	0	0	0	0	0	0	0	0	0
14/03/2006 11:00:00	0	0	0	0	0	0	0	0	0	0	0	0	0
14/03/2006 12:00:00	0	0	0	0	0	0	0	0	0	0	0	0	0
14/03/2006 13:00:00	0	0	0	0	0	0	0	0	0	0	0	0	0
14/03/2006 14:00:00	0	0	0	0	0	0	0	0	0	0	0	0	0
14/03/2006 15:00:00	0	0	0	0	0	0	0	0	0	0	0	0	0
14/03/2006 16:00:00	0	0	0	0	0	0	0	0	0	0	0	0	0
14/03/2006 17:00:00	0	0	0	0	0	0	0	0	0	0	0	0	0
14/03/2006 18:00:00	0	0	0	0	0	0	0	0	0	0	0	0	0
14/03/2006 19:00:00	0	0	0	0	0	0	0	0	0	0	0	0	0
14/03/2006 20:00:00	0	0	0	0	0	0	0	0	0	0	0	0	0
14/03/2006 21:00:00	0	0	0	0	0	0	0	0	0	0	0	0	0
14/03/2006 22:00:00	0	0	0	0	0	0	0	0	0	0	0	0	0
14/03/2006 23:00:00	0	0	0	0	0	0	0	0	0	0	0	0	0
15/03/2006 00:00:00	0	0	0	0	0	0	0	0	0	0	0	0	0
15/03/2006 01:00:00	0	0	0	0	0	0	0	0	0	0	0	0	0
15/03/2006 02:00:00	0	0	0	0	0	0	0	0	0	0	0	0	0
15/03/2006 03:00:00	0	0	0	0	0	0	0	0	0	0	0	0	0
15/03/2006 04:00:00	0	0	0	0	0	0	0	0	0	0	0	0	0
15/03/2006 05:00:00	0	0	0	0	0	0	0	0	0	0	0	0	0
15/03/2006 06:00:00	0	0	0	0	0	0	0	0	0	0	0	0	0
15/03/2006 07:00:00	0	0	0	0	0	0	0	0	0	0	0	0	0
15/03/2006 08:00:00	0	0	0	0	0	0	0	0	0	0	0	0	0
15/03/2006 09:00:00	0	0	0	0	0	0	0	0	0	0	0	0	0
15/03/2006 10:00:00	0	0	0	0	0	0	0	0	0	0	0	0	0
15/03/2006 11:00:00	0	0	0	0	0	0	0	0	0	0	0	0	0
15/03/2006 12:00:00	0	0	0	0	0	0	0	0	0	0	0	0	0
15/03/2006 13:00:00	0	0	0	0	0	0	0	0	0	0	0	0	0
15/03/2006 14:00:00	0	0	0	0	0	0	0	0	0	0	0	0	0
15/03/2006 15:00:00	0	0	0	0	0	0	0	0	0	0	0	0	0
15/03/2006 16:00:00	0	0	0	0	0	0	0	0	0	0	0	0	0
15/03/2006 17:00:00	0	0	0	0	0	0	0	0	0	0	0	0	0
15/03/2006 18:00:00	0	0	0	0	0	0	0	0	0	0	0	0	0
15/03/2006 19:00:00	0	0	0	0	0	0	0	0	0	0	0	0	0
15/03/2006 20:00:00	0	0	0	0	0	0	0	0	0	0	0	0	0
15/03/2006 21:00:00	0	0	0	0	0	0	0	0	0	0	0	0	0
15/03/2006 22:00:00	0	0	0	0	0	0	0	0	0	0	0	0	0
15/03/2006 23:00:00	0	0	0	0	0	0	0	0	0	0	0	0	0
16/03/2006 00:00:00	0	0	0	0	0	0	0	0	0	0	0	0	0
16/03/2006 01:00:00	0	0	0	0	0	0	0	0	0	0	0	0	0
16/03/2006 02:00:00	0	0	0	0	0	0	0	0	0	0	0	0	0
16/03/2006 03:00:00	0	0	0	0	0	0	0	0	0	0	0	0	0
16/03/2006 04:00:00	0	0	0	0	0	0	0	0	0	0	0	0	0
16/03/2006 05:00:00	0	0	0	0	0	0	0	0	0	0	0	0	0
16/03/2006 06:00:00	0	0	0	0	0	0	0	0	0	0	0	0	0
16/03/2006 07:00:00	0	0	0	0	0	0	0	0	0	0	0	0	0
16/03/2006 08:00:00	0	0	0	0	0	0	0	0	0	0	0	0	0
16/03/2006 09:00:00	0	0	0	0	0	0	0	0	0	0	0	0	0
16/03/2006 10:00:00	0	0	0	0	0	0	0	0	0	0	0	0	0
16/03/2006 11:00:00	0	0	0	0	0	0	0	0	0	0	0	0	0
16/03/2006 12:00:00	0	0	0	0	0	0	0	0	0	0	0	0	0
16/03/2006 13:00:00	0	0	0	0	0	0	0	0	0	0	0	0	0
16/03/2006 14:00:00	0	0	0	0	0	0	0	0	0	0	0	0	0
16/03/2006 15:00:00	0	0	0	0	0	0	0	0	0	0	0	0	0
16/03/2006 16:00:00	0	0	0	0	0	0	0	0	0	0	0	0	0
16/03/2006 17:00:00	0	0	0	0	0	0	0	0	0	0	0	0	0
16/03/2006 18:00:00	0	0	0	0	0	0	0	0	0	0	0	0	0
16/03/2006 19:00:00	0	0	0	0	0	0	0	0	0	0	0	0	0
16/03/2006 20:00:00	0	0	0	0	0	0	0	0	0	0	0	0	0
16/03/2006 21:00:00	0	0	0	0	0	0	0	0	0	0	0	0	0
16/03/2006 22:00:00	0	0	0	0	0	0	0	0	0	0	0	0	0
16/03/2006 23:00:00	0	0	0	0	0	0	0	0	0	0	0	0	0
17/03/2006 00:00:00	0	0	0	0	0	0	0	0	0	0	0	0	0
17/03/2006 01:00:00	0	0	0	0	0	0	0	0	0	0	0	0	0
17/03/2006 02:00:00	0	0	0	0	0	0	0	0	0	0	0	0	0
17/03/2006 03:00:00	0	0	0	0	0	0	0	0	0	0	0	0	0
17/03/2006 04:00:00	0	0	0	0	0	0	0	0	0	0	0	0	0
17/03/2006 05:00:00	0	0	0	0	0	0	0	0	0	0	0	0	0
17/03/2006 06:00:00	0	0	0	0	0	0	0	0	0	0	0	0	0
17/03/2006 07:00:00	0	0	0	0	0	0	0	0	0	0	0	0	0
17/03/2006 08:00:00	0	0	0	0	0	0	0	0	0	0	0	0	0
17/03/2006 09:00:00	0	0	0	0	0	0	0	0	0	0	0	0	0
17/03/2006 10:00:00	0	0	0	0	0	0	0	0	0	0	0	0	0
17/03/2006 11:00:00	0	0	0	0	0	0	0	0	0	0	0	0	0
17/03/2006 12:00:00	0	0	0	0	0	0	0	0	0	0	0	0	0
17/03/2006 13:00:00	0	0	0	0	0	0	0	0	0	0	0	0	0
17/03/2006 14:00:00	0	0	0	0	0	0	0	0	0	0	0	0	0
17/03/2006 15:00:00	0	0	0	0	0	0	0	0	0	0	0	0	0
17/03/2006 16:00:00	0	0	0	0	0	0	0	0	0	0	0	0	0
17/03/2006 17:00:00	0	0	0	0	0	0	0	0	0	0	0	0	0
17/03/2006 18:00:00	0	0	0	0	0	0	0	0	0	0	0	0	0
17/03/2006 19:00:00	0	0	0	0	0	0	0	0	0	0	0	0	0
17/03/2006 20:00:00	0	0	0	0	0	0	0	0	0	0	0	0	0
17/03/2006 21:00:00	0	0	0	0	0	0	0	0	0	0	0	0	0
17/03/2006 22:00:00	0	0	0	0	0	0	0	0	0	0	0	0	0
17/03/2006 23:00:00	0	0	0	0	0	0	0	0	0	0	0	0	0
18/03/2006 00:00:00	0	0	0	0	0	0	0	0	0	0	0	0	0
18/03/2006 01:00:00	0	0	0	0	0	0	0	0	0	0	0	0	0
18/03/2006 02:00:00	0	0	0	0	0	0	0	0	0	0	0	0	0
18/03/2006 03:00:00	0	0	0	0	0	0	0	0	0	0	0	0	0
18/03/2006 04:00:00	0	0	0	0	0	0	0	0	0	0	0	0	0
18/03/2006 05:00:00	0	0	0	0	0	0	0	0	0	0	0	0	0
18/03/2006 06:00:00	0	0	0	0	0	0	0	0	0	0	0	0	0
18/03/2006 07:00:00	0	0	0	0	0	0	0	0	0	0	0	0	0
18/03/2006 08:00:00	0	0	0	0	0	0	0	0	0	0	0	0	0
18/03/2006 09:00:00	0	0	0	0	0	0	0	0	0	0	0	0	0
18/03/2006 10:00:00	0	0	0	0	0	0	0	0	0	0	0	0	0
18/03/2006 11:00:00	0	0	0	0	0	0	0	0	0	0	0	0	0
18/03/2006 12:00:00	0	0	0	0	0	0	0	0	0	0	0	0	0
18/03/2006 13:00:00	0	0	0	0	0	0	0	0	0	0	0	0	0
18/03/2006 14:00:00	0	0	0	0	0	0	0	0	0	0	0	0	0
18/03/2006 15:00:00	0	0	0	0	0	0	0	0	0	0	0	0	0
18/03/2006 16:00:00	0	0	0	0	0	0	0	0	0	0	0	0	0
18/03/2006 17:00:00	0	0	0	0	0	0	0	0	0	0	0	0	0
18/03/2006 18:00:00	0	0	0	0	0	0	0	0	0	0	0	0	0
18/03/2006 19:00:00	0	0	0	0	0	0	0	0	0	0	0	0	0
18/03/2006 20:00:00	0	0	0	0	0	0	0	0	0	0	0	0	0
18/03/2006 21:00:00	0	0	0	0	0	0	0	0	0	0	0	0	0
18/03/2006 22:00:00	0	0	0	0	0	0	0	0	0	0	0	0	0
18/03/2006 23:00:00	0	0	0	0	0	0	0	0	0	0	0	0	0
19/03/2006 00:00:00	0	0	0	0	0	0	0	0	0	0	0	0	0
19/03/2006 01:00:00	0	0	0	0	0	0	0	0	0	0	0	0	0
19/03/2006 02:00:00	0	0	0	0	0	0	0	0	0	0	0	0	0
19/03/2006 03:00:00	0	0	0	0	0	0	0	0	0	0	0	0	0
19/03/2006 04:00:00	0	0	0	0	0	0	0	0	0	0	0	0	0
19/03/2006 05:00:00	0	0	0	0	0	0	0	0	0	0	0	0	0
19/03/2006 06:00:00	0	0	0	0	0	0	0	0	0	0	0	0	0
19/03/2006 07:00:00	0	0	0	0	0	0	0	0	0	0	0	0	0
19/03/2006 08:00:00	0	0	0	0	0	0	0	0	0	0	0	0	0
19/03/2006 09:00:00	0	0	0	0	0	0	0	0	0	0	0	0	0
19/03/2006 10:00:00	0	0	0	0	0	0	0	0	0	0	0	0	0
19/03/2006 11:00:00	0	0	0	0	0	0	0	0	0	0	0	0	0
19/03/2006 12:00:00	0	0	0	0	0	0	0	0	0	0	0	0	0
19/03/2006 13:00:00	0	0	0	0	0	0	0	0	0	0	0	0	0
19/03/2006 14:00:00	0	0	0	0	0	0	0	0	0	0	0	0	0
19/03/2006 15:00:00	0	0	0	0	0	0	0	0	0	0	0	0	0
19/03/2006 16:00:00	0	0	0	0	0	0	0	0	0	0	0	0	0
19/03/2006 17:00:00	0	0	0	0	0	0	0	0	0	0	0	0	0
19/03/2006 18:00:00	0	0	0	0	0	0	0	0	0	0	0	0	0
19/03/2006 19:00:00	0	0	0	0	0	0	0	0	0	0	0	0	0
19/03/2006 20:00:00	0	0	0	0	0	0	0	0	0	0	0	0	0
19/03/2006 21:00:00	0	0	0	0	0	0	0	0	0	0	0	0	0
19/03/2006 22:00:00	0	0	0	0	0	0	0	0	0	0	0	0	0
19/03/2006 23:00:00	0	0	0	0	0	0	0	0	0	0	0	0	0
20/03/2006 00:00:00	0	0	0	0	0	0	0	0	0	0	0	0	0
20/03/2006 01:00:00	0	0	0	0	0	0	0	0	0	0	0	0	0
20/03/2006 02:00:00	0	0	0	0	0	0	0	0	0	0	0	0	0
20/03/2006 03:00:00	0	0	0	0	0	0	0	0	0	0	0	0	0
20/03/2006 04:00:00	0	0	0	0	0	0	0	0	0	0	0	0	0
20/03/2006 05:00:00	0	0	0	0	0	0	0	0	0	0	0	0	0
20/03/2006 06:00:00	0	0	0	0	0	0	0	0	0	0	0	0	0
20/03/2006 07:00:00	0	0	0	0	0	0	0	0	0	0	0	0	0
20/03/2006 08:00:00	0	0	0	0	0	0	0	0	0	0	0	0	0
20/03/2006 09:00:00	0	0	0	0	0	0	0	0	0	0	0	0	0
20/03/2006 10:00:00	0	0	0	0	0	0	0	0	0	0	0	0	0
20/03/2006 11:00:00	0	0	0	0	0	0	0	0	0	0	0	0	0
20/03/2006 12:00:00	0	0	0	0	0	0	0	0	0	0	0	0	0
20/03/2006 13:00:00	0	0	0	0	0	0	0	0	0	0	0	0	0
20/03/2006 14:00:00	0	0	0	0	0	0	0	0	0	0	0	0	0
20/03/2006 15:00:00	0	0	0	0	0	0	0	0	0	0	0	0	0
20/03/2006 16:00:00	0	0	0	0	0	0	0	0	0	0	0	0	0
20/03/2006 17:00:00	0	0	0	0	0	0	0	0	0	0	0	0	0
20/03/2006 18:00:00	0	0	0	0	0	0	0	0	0	0	0	0	0
20/03/2006 19:00:00	0	0	0	0	0	0	0	0	0	0	0	0	0
20/03/2006 20:00:00	0	0	0	0	0	0	0	0	0	0	0	0	0
20/03/2006 21:00:00	0	0	0	0	0	0	0	0	0	0	0	0	0
20/03/2006 22:00:00	0	0	0	0	0	0	0	0	0	0	0	0	0
20/03/2006 23:00:00	0	0	0	0	0	0	0	0	0	0	0	0	0
21/03/2006 00:00:00	0	0	0	0	0	0	0	0	0	0	0	0	0
21/03/2006 01:00:00	0	0	0	0	0	0	0	0	0	0	0	0	0
21/03/2006 02:00:00	0	0	0	0	0	0	0	0	0	0	0	0	0
21/03/2006 03:00:00	0	0	0	0	0	0	0	0	0	0	0	0	0
21/03/2006 04:00:00	0	0	0	0	0	0	0	0	0	0	0	0	0
21/03/2006 05:00:00	0	0	0	0	0	0	0	0	0	0	0	0	0
21/03/2006 06:00:00	0	0	0	0	0	0	0	0	0	0	0	0	0
21/03/2006 07:00:00	0	0	0	0	0	0	0	0	0	0	0	0	0
21/03/2006 08:00:00	0	0	0	0	0	0	0	0	0	0	0	0	0
21/03/2006 09:00:00	0	0	0	0	0	0	0	0	0	0	0	0	0
21/03/2006 10:00:00	0	0	0	0	0	0	0	0	0	0	0	0	0
21/03/2006 11:00:00	0	0	0	0	0	0	0	0	0	0	0	0	0
21/03/2006 12:00:00	0	0	0	0	0	0	0	0	0	0	0	0	0
21/03/2006 13:00:00	0	0	0	0	0	0	0	0	0	0	0	0	0
21/03/2006 14:00:00	0	0	0	0	0	0	0	0	0	0	0	0	0
21/03/2006 15:00:00	0	0	0	0	0	0	0	0	0	0	0	0	0
21/03/2006 16:00:00	0	0	0	0	0	0	0	0	0	0	0	0	0
21/03/2006 17:00:00	0	0	0	0	0	0	0	0	0	0	0	0	0
21/03/2006 18:00:00	0	0	0	0	0	0	0	0	0	0	0	0	0
21/03/2006 19:00:00	0	0	0	0	0	0	0	0	0	0	0	0	0
21/03/2006 20:00:00	0	0	0	0	0	0	0	0	0	0	0	0	0
21/03/2006 21:00:00	0	0	0	0	0	0	0	0	0	0	0	0	0
21/03/2006 22:00:00	0	0	0	0	0	0	0	0	0	0	0	0	0
21/03/2006 23:00:00	0	0	0	0	0	0	0	0	0	0	0	0	0
22/03/2006 00:00:00	0	0	0	0	0	0	0	0	0	0	0	0	0
22/03/2006 01:00:00	0	0	0	0	0	0	0	0	0	0	0	0	0
22/03/2006 02:00:00	0	0	0	0	0	0	0	0	0	0	0	0	0
22/03/2006 03:00:00	0	0	0	0	0	0	0	0	0	0	0	0	0
22/03/2006 04:00:00	0	0	0	0	0	0	0	0	0	0	0	0	0
22/03/2006 05:00:00	0	0	0	0	0	0	0	0	0	0	0	0	0
22/03/2006 06:00:00	0	0	0	0	0	0	0	0	0	0	0	0	0
22/03/2006 07:00:00	0	0	0	0	0	0	0	0	0	0	0	0	0
22/03/2006 08:00:00	0	0	0	0	0	0	0	0	0	0	0	0	0
22/03/2006 09:00:00	0	0	0	0	0	0	0	0	0	0	0	0	0
22/03/2006 10:00:00	0	0	0	0	0	0	0	0	0	0	0	0	0
22/03/2006 11:00:00	0	0	0	0	0	0	0	0	0	0	0	0	0
22/03/2006 12:00:00	0	0	0	0	0	0	0	0	0	0	0	0	0
22/03/2006 13:00:00	0	0	0	0	0	0	0	0	0	0	0	0	0
22/03/2006 14:00:00	0	0	0	0	0	0	0	0	0	0	0	0	0
22/03/2006 15:00:00	0	0	0	0	0	0	0	0	0	0	0	0	0
22/03/2006 16:00:00	0	0	0	0	0	0	0	0	0	0	0	0	0
22/03/2006 17:00:00	0	0	0	0	0	0	0	0	0	0	0	0	0
22/03/2006 18:00:00	0	0	0	0	0	0	0	0	0	0	0	0	0
22/03/2006 19:00:00	0	0	0	0	0	0	0	0	0	0	0	0	0
22/03/2006 20:00:00	0	0	0	0	0	0	0	0	0	0	0	0	0
22/03/2006 21:00:00	0	0	0	0	0	0	0	0	0	0	0	0	0
22/03/2006 22:00:00	0	0	0	0	0	0	0	0	0	0	0	0	0
22/03/2006 23:00:00	0	0	0	0	0	0	0	0	0	0	0	0	0
23/03/2006 00:00:00	0	0	0	0	0	0	0	0	0	0	0	0	0
23/03/2006 01:00:00	0	0	0	0	0	0	0	0	0	0	0	0	0
23/03/2006 02:00:00	0	0	0	0	0	0	0	0	0	0	0	0	0
23/03/2006 03:00:00	0	0	0	0	0	0	0	0	0	0	0	0	0
23/03/2006 04:00:00	0	0	0	0	0	0	0	0	0	0	0	0	0
23/03/2006 05:00:00	0	0	0	0	0	0	0	0	0	0	0	0	0
23/03/2006 06:00:00	0	0	0	0	0	0	0	0	0	0	0	0	0
23/03/2006 07:00:00	0	0	0	0	0	0	0	0	0	0	0	0	0
23/03/2006 08:00:00	0	0	0	0	0	0	0	0	0	0	0	0	0
23/03/2006 09:00:00	0	0	0	0	0	0	0	0	0	0	0	0	0
23/03/2006 10:00:00	0	0	0	0	0	0	0	0	0	0	0	0	0
23/03/2006 11:00:00	0	0	0	0	0	0	0	0	0	0	0	0	0
23/03/2006 12:00:00	0	0	0	0	0	0	0	0	0	0	0	0	0
23/03/2006 13:00:00	0	0	0	0	0	0	0	0	0	0	0	0	0
23/03/2006 14:00:00	0	0	0	0	0	0	0	0	0	0	0	0	0
23/03/2006 15:00:00	0	0	0	0	0	0	0	0	0	0	0	0	0
23/03/2006 16:00:00	0	0	0	0	0	0	0	0	0	0	0	0	0
23/03/2006 17:00:00	0	0	0	0	0	0	0	0	0	0	0	0	0
23/03/2006 18:00:00	0	0	0	0	0	0	0	0	0	0	0	0	0
23/03/2006 19:00:00	0	0	0	0	0	0	0	0	0	0	0	0	0
23/03/2006 20:00:00	0	0	0	0	0	0	0	0	0	0	0	0	0
23/03/2006 21:00:00	0	0	0	0	0	0	0	0	0	0	0	0	0
23/03/2006 22:00:00	0	0	0	0	0	0	0	0	0	0	0	0	0
23/03/2006 23:00:00	0	0	0	0	0	0	0	0	0	0	0	0	0
24/03/2006 00:00:00	0	0	0	0	0	0	0	0	0	0	0	0	0
24/03/2006 01:00:00	0	0	0	0	0	0	0	0	0	0	0	0	0
24/03/2006 02:00:00	0	0	0	0	0	0	0	0	0	0	0	0	0
24/03/2006 03:00:00	0	0	0	0	0	0	0	0	0	0	0	0	0
24/03/2006 04:00:00	0	0	0	0	0	0	0	0	0	0	0	0	0
24/03/2006 05:00:00	0	0	0	0	0	0	0	0	0	0	0	0	0
24/03/2006 06:00:00	0	0	0	0	0	0	0	0	0	0	0	0	0
24/03/2006 07:00:00	0	0	0	0	0	0	0	0	0	0	0	0	0
24/03/2006 08:00:00	0	0	0	0	0	0	0	0	0	0	0	0	0
24/03/2006 09:00:00	0	0	0	0	0	0	0	0	0	0	0	0	0
24/03/2006 10:00:00	0	0	0	0	0	0	0	0	0	0	0	0	0
24/03/2006 11:00:00	0	0	0	0	0	0	0	0	0	0	0	0	0
24/03/2006 12:00:00	0	0	0	0	0	0	0	0	0	0	0	0	0
24/03/2006 13:00:00	0	0	0	0	0	0	0	0	0	0	0	0	0
24/03/2006 14:00:00	0	0	0	0	0	0	0	0	0	0	0	0	0
24/03/2006 15:00:00	0	0	0	0	0	0	0	0	0	0	0	0	0
24/03/2006 16:00:00	0	0	0	0	0	0	0	0	0	0	0	0	0
24/03/2006 17:00:00	0	0	0	0	0	0	0	0	0	0	0	0	0
24/03/2006 18:00:00	0	0	0	0	0	0	0	0	0	0	0	0	0
24/03/2006 19:00:00	0	0	0	0	0	0	0	0	0	0	0	0	0
24/03/2006 20:00:00	0	0	0	0	0	0	0	0	0	0	0	0	0
24/03/2006 21:00:00	0	0	0	0	0	0	0	0	0	0	0	0	0
24/03/2006 22:00:00	0	0	0	0	0	0	0	0	0	0	0	0	0
24/03/2006 23:00:00	0	0	0	0	0	0	0	0	0	0	0	0	0
25/03/2006 00:00:00	0	0	0	0	0	0	0	0	0	0	0	0	0
25/03/2006 01:00:00	0	0	0	0	0	0	0	0	0	0	0	0	0
25/03/2006 02:00:00	0	0	0	0	0	0	0	0	0	0	0	0	0
25/03/2006 03:00:00	0	0	0	0	0	0	0	0	0	0	0	0	0
25/03/2006 04:00:00	0	0	0	0	0	0	0	0	0	0	0	0	0
25/03/2006 05:00:00	0	0	0	0	0	0	0	0	0	0	0	0	0
25/03/2006 06:00:00	0	0	0	0	0	0	0	0	0	0	0	0	0
[truncated: 6,761 more rows]
