# Supplementary material for: Flood Prediction in Ungauged Basins by Physical-Based TOPKAPI Model
Source: Hindawi journal article supplement (doi:10.1155/2019/4795853), 2019-09-05
Supplement: f1 [file 4795853.f1.zip › 4795853.f1/xxdtemp_2003.csv]

time	57290	57297
01/01/2003 00:00:00	-20.35323302	-23.78945355
01/01/2003 01:00:00	-16.04552382	-19.03539787
01/01/2003 02:00:00	-12.23228578	-14.80637743
01/01/2003 03:00:00	-8.887578842	-11.07543925
01/01/2003 04:00:00	-5.985462961	-7.815630365
01/01/2003 05:00:00	-3.49999808	-4.999997814
01/01/2003 06:00:00	-1.405244144	-2.601588625
01/01/2003 07:00:00	0.324738902	-0.593449832
01/01/2003 08:00:00	1.71589111	1.051371533
01/01/2003 09:00:00	2.794152537	2.359828439
01/01/2003 10:00:00	3.585463235	3.358873853
01/01/2003 11:00:00	4.11576326	4.075460743
01/01/2003 12:00:00	4.410992666	4.536542076
01/01/2003 13:00:00	4.497091506	4.769070821
01/01/2003 14:00:00	4.399999836	4.799999944
01/01/2003 15:00:00	4.145657709	4.656282415
01/01/2003 16:00:00	3.76000518	4.3648712
01/01/2003 17:00:00	3.268982302	3.952719268
01/01/2003 18:00:00	2.698529131	3.446779585
01/01/2003 19:00:00	2.074585721	2.874005121
01/01/2003 20:00:00	1.423092125	2.261348842
01/01/2003 21:00:00	0.769988399	1.635763716
01/01/2003 22:00:00	0.141214596	1.024202712
01/01/2003 23:00:00	-0.437289229	0.453618796
02/01/2003 00:00:00	-0.939583022	-0.049035063
02/01/2003 01:00:00	-1.339726729	-0.456805897
02/01/2003 02:00:00	-1.611780296	-0.74274074
02/01/2003 03:00:00	-1.729803667	-0.879886623
02/01/2003 04:00:00	-1.667856789	-0.841290578
02/01/2003 05:00:00	-1.399999608	-0.599999637
02/01/2003 06:00:00	-0.913950252	-0.143107688
02/01/2003 07:00:00	-0.252059407	0.48610414
02/01/2003 08:00:00	0.52966414	1.230307947
02/01/2003 09:00:00	1.375211605	2.032175838
02/01/2003 10:00:00	2.228574203	2.834379913
02/01/2003 11:00:00	3.033743149	3.579592276
02/01/2003 12:00:00	3.734709656	4.210485027
02/01/2003 13:00:00	4.275464941	4.66973027
02/01/2003 14:00:00	4.600000218	4.900000107
02/01/2003 15:00:00	4.667792482	4.860086977
02/01/2003 16:00:00	4.500261643	4.573264458
02/01/2003 17:00:00	4.134313287	4.078926359
02/01/2003 18:00:00	3.606853001	3.416466488
02/01/2003 19:00:00	2.954786372	2.625278655
02/01/2003 20:00:00	2.215018987	1.744756668
02/01/2003 21:00:00	1.424456432	0.814294335
02/01/2003 22:00:00	0.620004295	-0.126714534
02/01/2003 23:00:00	-0.161431837	-1.038876131
03/01/2003 00:00:00	-0.882946378	-1.882796648
03/01/2003 01:00:00	-1.507633741	-2.619082275
03/01/2003 02:00:00	-1.998588339	-3.208339203
03/01/2003 03:00:00	-2.318904585	-3.611173625
03/01/2003 04:00:00	-2.431676892	-3.788191732
03/01/2003 05:00:00	-2.299999674	-3.699999714
03/01/2003 06:00:00	-1.903805184	-3.324526401
03/01/2003 07:00:00	-1.290376789	-2.708990921
03/01/2003 08:00:00	-0.523835573	-1.917934913
03/01/2003 09:00:00	0.33169738	-1.015900015
03/01/2003 10:00:00	1.212100986	-0.067427865
03/01/2003 11:00:00	2.053254161	0.862939896
03/01/2003 12:00:00	2.791035821	1.710661631
03/01/2003 13:00:00	3.361324883	2.411195702
03/01/2003 14:00:00	3.700000261	2.900000468
03/01/2003 15:00:00	3.760219705	3.129234727
03/01/2003 16:00:00	3.564256026	3.117858746
03/01/2003 17:00:00	3.151660731	2.9015331
03/01/2003 18:00:00	2.561985329	2.515918364
03/01/2003 19:00:00	1.834781329	1.996675109
03/01/2003 20:00:00	1.00960024	1.379463911
03/01/2003 21:00:00	0.125993569	0.699945343
03/01/2003 22:00:00	-0.776487174	-0.006220021
03/01/2003 23:00:00	-1.658290482	-0.703371608
04/01/2003 00:00:00	-2.479864845	-1.355848844
04/01/2003 01:00:00	-3.201658755	-1.927991155
04/01/2003 02:00:00	-3.784120704	-2.384137967
04/01/2003 03:00:00	-4.187699182	-2.688628707
04/01/2003 04:00:00	-4.372842683	-2.805802801
04/01/2003 05:00:00	-4.299999696	-2.699999675
04/01/2003 06:00:00	-3.947576226	-2.352116018
04/01/2003 07:00:00	-3.365808028	-1.80927728
04/01/2003 08:00:00	-2.622888215	-1.135166036
04/01/2003 09:00:00	-1.7870099	-0.393464858
04/01/2003 10:00:00	-0.926366199	0.352143679
04/01/2003 11:00:00	-0.109150225	1.037977004
04/01/2003 12:00:00	0.596444908	1.600352542
04/01/2003 13:00:00	1.122226086	1.975587721
04/01/2003 14:00:00	1.400000195	2.099999967
04/01/2003 15:00:00	1.380526957	1.928199145
04/01/2003 16:00:00	1.090377099	1.487964541
04/01/2003 17:00:00	0.575074015	0.825367716
04/01/2003 18:00:00	-0.119858901	-0.013519769
04/01/2003 19:00:00	-0.948898255	-0.982626353
04/01/2003 20:00:00	-1.866520652	-2.035880475
04/01/2003 21:00:00	-2.827202699	-3.127210576
04/01/2003 22:00:00	-3.785421002	-4.210545094
04/01/2003 23:00:00	-4.695652166	-5.239812467
05/01/2003 00:00:00	-5.512372798	-6.168941137
05/01/2003 01:00:00	-6.190059503	-6.95185954
05/01/2003 02:00:00	-6.683188889	-7.542496118
05/01/2003 03:00:00	-6.946237559	-7.894779309
05/01/2003 04:00:00	-6.933682121	-7.962637552
05/01/2003 05:00:00	-6.599999181	-7.699999287
05/01/2003 06:00:00	-5.920879761	-7.081969854
05/01/2003 07:00:00	-4.956872147	-6.168361787
05/01/2003 08:00:00	-3.789738836	-5.04016432
05/01/2003 09:00:00	-2.501242324	-3.778366683
05/01/2003 10:00:00	-1.173145109	-2.463958108
05/01/2003 11:00:00	0.112790312	-1.177927828
05/01/2003 12:00:00	1.274801441	-0.001265074
05/01/2003 13:00:00	2.231125782	0.985040922
05/01/2003 14:00:00	2.900000836	1.700000928
05/01/2003 15:00:00	3.221400295	2.08378427
05/01/2003 16:00:00	3.222242159	2.161194078
05/01/2003 17:00:00	2.951180395	1.978191826
05/01/2003 18:00:00	2.456868972	1.580738988
05/01/2003 19:00:00	1.787961858	1.014797039
05/01/2003 20:00:00	0.993113022	0.326327454
05/01/2003 21:00:00	0.120976433	-0.438708294
05/01/2003 22:00:00	-0.779793942	-1.234348731
05/01/2003 23:00:00	-1.660544134	-2.014632381
06/01/2003 00:00:00	-2.472620175	-2.733597771
06/01/2003 01:00:00	-3.167368097	-3.345283426
06/01/2003 02:00:00	-3.69613393	-3.803727872
06/01/2003 03:00:00	-4.010263708	-4.062969634
06/01/2003 04:00:00	-4.06110346	-4.077047239
06/01/2003 05:00:00	-3.79999922	-3.799999212
06/01/2003 06:00:00	-3.200540367	-3.206958458
06/01/2003 07:00:00	-2.325289192	-2.35743495
06/01/2003 08:00:00	-1.259051095	-1.33203281
06/01/2003 09:00:00	-0.086631477	-0.211356161
06/01/2003 10:00:00	1.107164264	0.923990872
06/01/2003 11:00:00	2.237530728	1.993404168
06/01/2003 12:00:00	3.219662514	2.916279601
06/01/2003 13:00:00	3.968754224	3.612013049
06/01/2003 14:00:00	4.400000457	4.000000388
06/01/2003 15:00:00	4.451837546	4.022073325
06/01/2003 16:00:00	4.155668232	3.709806378
06/01/2003 17:00:00	3.566136726	3.117209646
06/01/2003 18:00:00	2.737887239	2.298293225
06/01/2003 19:00:00	1.725563984	1.307067213
06/01/2003 20:00:00	0.583811172	0.197541706
06/01/2003 21:00:00	-0.632726986	-0.976273199
06/01/2003 22:00:00	-1.869406278	-2.160367403
06/01/2003 23:00:00	-3.071582492	-3.300730811
07/01/2003 00:00:00	-4.184611417	-4.343353325
07/01/2003 01:00:00	-5.153848842	-5.234224848
07/01/2003 02:00:00	-5.924650554	-5.919335283
07/01/2003 03:00:00	-6.442372342	-6.344674532
07/01/2003 04:00:00	-6.652369994	-6.4562325
07/01/2003 05:00:00	-6.499999299	-6.199999087
07/01/2003 06:00:00	-5.954613713	-5.547023837
07/01/2003 07:00:00	-5.081556786	-4.56859424
07/01/2003 08:00:00	-3.97016945	-3.361057131
07/01/2003 09:00:00	-2.709792636	-2.02075934
07/01/2003 10:00:00	-1.389767275	-0.644047699
07/01/2003 11:00:00	-0.0994343	0.67273096
07/01/2003 12:00:00	1.07186536	1.833229805
07/01/2003 13:00:00	2.034790771	2.741102005
07/01/2003 14:00:00	2.700001004	3.300000727
07/01/2003 15:00:00	3.00191808	3.440248682
07/01/2003 16:00:00	2.970015241	3.198846086
07/01/2003 17:00:00	2.65752839	2.639462366
07/01/2003 18:00:00	2.117693428	1.825766951
07/01/2003 19:00:00	1.403746257	0.821429268
07/01/2003 20:00:00	0.56892278	-0.309881255
07/01/2003 21:00:00	-0.333541103	-1.50449519
07/01/2003 22:00:00	-1.250409489	-2.69874311
07/01/2003 23:00:00	-2.128446477	-3.828955586
08/01/2003 00:00:00	-2.914416165	-4.831463191
08/01/2003 01:00:00	-3.55508265	-5.642596497
08/01/2003 02:00:00	-3.997210032	-6.198686076
08/01/2003 03:00:00	-4.187562408	-6.436062501
08/01/2003 04:00:00	-4.072903877	-6.291056343
08/01/2003 05:00:00	-3.599998537	-5.699998176
08/01/2003 06:00:00	-2.739837209	-4.628570345
08/01/2003 07:00:00	-1.560316972	-3.15986153
08/01/2003 08:00:00	-0.15356131	-1.406311799
08/01/2003 09:00:00	1.388306292	0.519638778
08/01/2003 10:00:00	2.973162349	2.505550134
08/01/2003 11:00:00	4.508883378	4.438982198
08/01/2003 12:00:00	5.903345894	6.207494904
08/01/2003 13:00:00	7.064426412	7.698648181
08/01/2003 14:00:00	7.900001449	8.800001961
08/01/2003 15:00:00	8.342324266	9.428365212
08/01/2003 16:00:00	8.421154454	9.617542263
08/01/2003 17:00:00	8.190628021	9.430586085
08/01/2003 18:00:00	7.704880974	8.930549645
08/01/2003 19:00:00	7.018049321	8.180485916
08/01/2003 20:00:00	6.184269069	7.243447865
08/01/2003 21:00:00	5.257676226	6.182488464
08/01/2003 22:00:00	4.2924068	5.060660683
08/01/2003 23:00:00	3.342596798	3.94101749
09/01/2003 00:00:00	2.462382227	2.886611856
09/01/2003 01:00:00	1.705899095	1.960496752
09/01/2003 02:00:00	1.127283411	1.225725146
09/01/2003 03:00:00	0.78067118	0.745350008
09/01/2003 04:00:00	0.720198411	0.582424309
09/01/2003 05:00:00	1.000001112	0.800001019
09/01/2003 06:00:00	1.649437269	1.433307774
09/01/2003 07:00:00	2.598753496	2.406271672
09/01/2003 08:00:00	3.753418738	3.614994874
09/01/2003 09:00:00	5.01890194	4.955579542
09/01/2003 10:00:00	6.300672049	6.324127838
09/01/2003 11:00:00	7.50419801	7.616741922
09/01/2003 12:00:00	8.534948769	8.729523957
09/01/2003 13:00:00	9.298393272	9.558576102
09/01/2003 14:00:00	9.700000463	10.00000052
09/01/2003 15:00:00	9.671988358	9.979246092
09/01/2003 16:00:00	9.25357046	9.539147703
09/01/2003 17:00:00	8.510708947	8.751886527
09/01/2003 18:00:00	7.509365998	7.689643739
09/01/2003 19:00:00	6.315503793	6.424600513
09/01/2003 20:00:00	4.99508451	5.028938023
09/01/2003 21:00:00	3.614070327	3.574837443
09/01/2003 22:00:00	2.238423424	2.134479948
09/01/2003 23:00:00	0.93410598	0.780046711
10/01/2003 00:00:00	-0.232919826	-0.416281094
10/01/2003 01:00:00	-1.196691817	-1.382322292
10/01/2003 02:00:00	-1.891247812	-2.045895709
10/01/2003 03:00:00	-2.250625633	-2.334820171
10/01/2003 04:00:00	-2.208863101	-2.176914504
10/01/2003 05:00:00	-1.699998037	-1.499997533
10/01/2003 06:00:00	-0.689321096	-0.267084014
10/01/2003 07:00:00	0.7328667	1.418028674
10/01/2003 08:00:00	2.445011974	3.416347761
10/01/2003 09:00:00	4.325561353	5.588880482
10/01/2003 10:00:00	6.252961461	7.796634068
10/01/2003 11:00:00	8.105658923	9.900615752
10/01/2003 12:00:00	9.762100365	11.76183277
10/01/2003 13:00:00	11.10073241	13.24129235
10/01/2003 14:00:00	12.00000169	14.20000172
10/01/2003 15:00:00	12.37097455	14.53654602
10/01/2003 16:00:00	12.25519527	14.29982078
10/01/2003 17:00:00	11.72682731	13.57629882
10/01/2003 18:00:00	10.86003416	12.45245297
10/01/2003 19:00:00	9.72897929	11.01475606
10/01/2003 20:00:00	8.407826187	9.349680924
10/01/2003 21:00:00	6.970738326	7.543700391
10/01/2003 22:00:00	5.491879186	5.68328729
10/01/2003 23:00:00	4.045412245	3.854914449
11/01/2003 00:00:00	2.705500981	2.145054698
11/01/2003 01:00:00	1.546308873	0.640180867
11/01/2003 02:00:00	0.6419994	-0.573234214
11/01/2003 03:00:00	0.066736039	-1.408717716
11/01/2003 04:00:00	-0.105317731	-1.779796809
11/01/2003 05:00:00	0.20000157	-1.599998664
11/01/2003 06:00:00	1.024255483	-0.819168516
11/01/2003 07:00:00	2.278598894	0.46757734
11/01/2003 08:00:00	3.84158529	2.128805148
11/01/2003 09:00:00	5.591768161	4.033081149
11/01/2003 10:00:00	7.407700996	6.048971587
11/01/2003 11:00:00	9.167937282	8.045042702
11/01/2003 12:00:00	10.75103051	9.889860738
11/01/2003 13:00:00	12.03553416	11.45199194
11/01/2003 14:00:00	12.90000174	12.60000254
11/01/2003 15:00:00	13.25523022	13.23577736
11/01/2003 16:00:00	13.14098949	13.39447432
11/01/2003 17:00:00	12.62929238	13.14456938
11/01/2003 18:00:00	11.79215173	12.55453845
11/01/2003 19:00:00	10.70158038	11.69285748
11/01/2003 20:00:00	9.429591159	10.6280024
11/01/2003 21:00:00	8.048196901	9.428449149
11/01/2003 22:00:00	6.629410442	8.162673662
11/01/2003 23:00:00	5.245244618	6.899151874
12/01/2003 00:00:00	3.967712262	5.706359721
12/01/2003 01:00:00	2.868826212	4.652773139
12/01/2003 02:00:00	2.0205993	3.806868064
12/01/2003 03:00:00	1.495044363	3.23712043
12/01/2003 04:00:00	1.364174235	3.012006174
12/01/2003 05:00:00	1.700001751	3.200001232
12/01/2003 06:00:00	2.542569729	3.840801609
12/01/2003 07:00:00	3.804042047	4.858984612
12/01/2003 08:00:00	5.364613135	6.150348127
12/01/2003 09:00:00	7.104477419	7.61069004
12/01/2003 10:00:00	8.903829329	9.135808238
12/01/2003 11:00:00	10.64286329	10.62150061
12/01/2003 12:00:00	12.20177374	11.96356503
12/01/2003 13:00:00	13.46075509	13.05779941
12/01/2003 14:00:00	14.30000178	13.80000161
12/01/2003 15:00:00	14.63184103	14.11401962
12/01/2003 16:00:00	14.49713005	14.03590078
12/01/2003 17:00:00	13.96885825	13.62974202
12/01/2003 18:00:00	13.12001506	12.95964025
12/01/2003 19:00:00	12.0235899	12.0896924
12/01/2003 20:00:00	10.75257219	11.0839954
12/01/2003 21:00:00	9.379951348	10.00664616
12/01/2003 22:00:00	7.978716792	8.921741624
12/01/2003 23:00:00	6.621857943	7.893378699
13/01/2003 00:00:00	5.382364223	6.985654314
13/01/2003 01:00:00	4.333225049	6.262665393
13/01/2003 02:00:00	3.547429843	5.78850886
13/01/2003 03:00:00	3.097968023	5.627281639
13/01/2003 04:00:00	3.057829011	5.843080653
13/01/2003 05:00:00	3.500002225	6.500002826
13/01/2003 06:00:00	4.463695096	7.630953003
13/01/2003 07:00:00	5.852988368	9.144068884
13/01/2003 08:00:00	7.538181434	10.91629668
13/01/2003 09:00:00	9.389573686	12.82458261
13/01/2003 10:00:00	11.27746452	14.74587287
13/01/2003 11:00:00	13.07215332	16.55711367
13/01/2003 12:00:00	14.64393948	18.13525124
13/01/2003 13:00:00	15.86312239	19.35723177
13/01/2003 14:00:00	16.60000146	20.10000149
13/01/2003 15:00:00	16.75978591	20.27367439
13/01/2003 16:00:00	16.38732306	19.92103444
13/01/2003 17:00:00	15.56236938	19.11803273
13/01/2003 18:00:00	14.36468136	17.94062039
13/01/2003 19:00:00	12.87401549	16.46474851
13/01/2003 20:00:00	11.17012825	14.76636822
13/01/2003 21:00:00	9.332776107	12.92143062
13/01/2003 22:00:00	7.44171556	11.00588682
13/01/2003 23:00:00	5.576703086	9.095687928
14/01/2003 00:00:00	3.817495168	7.266785061
14/01/2003 01:00:00	2.243848289	5.595129325
14/01/2003 02:00:00	0.935518932	4.156671832
14/01/2003 03:00:00	-0.027736421	3.027363691
14/01/2003 04:00:00	-0.566161286	2.283156014
14/01/2003 05:00:00	-0.599999183	1.999999909
14/01/2003 06:00:00	-0.083049056	2.223214051
14/01/2003 07:00:00	0.896669766	2.875588595
14/01/2003 08:00:00	2.217583202	3.849281873
14/01/2003 09:00:00	3.758117166	5.036452214
14/01/2003 10:00:00	5.396697575	6.329257952
14/01/2003 11:00:00	7.011750345	7.619857417
14/01/2003 12:00:00	8.481701391	8.800408942
14/01/2003 13:00:00	9.68497663	9.763070857
14/01/2003 14:00:00	10.50000198	10.40000149
14/01/2003 15:00:00	10.83644364	10.63069756
14/01/2003 16:00:00	10.72892773	10.48400812
14/01/2003 17:00:00	10.24332	10.01612008
14/01/2003 18:00:00	9.445486202	9.283220332
14/01/2003 19:00:00	8.401292103	8.341495758
14/01/2003 20:00:00	7.176603459	7.247133253
14/01/2003 21:00:00	5.837286027	6.056319708
14/01/2003 22:00:00	4.449205566	4.825242016
14/01/2003 23:00:00	3.078227834	3.610087067
15/01/2003 00:00:00	1.790218589	2.467041753
15/01/2003 01:00:00	0.65104359	1.452292965
15/01/2003 02:00:00	-0.273431406	0.622027595
15/01/2003 03:00:00	-0.91734064	0.032432533
15/01/2003 04:00:00	-1.214818354	-0.260305329
15/01/2003 05:00:00	-1.09999879	-0.199999098
15/01/2003 06:00:00	-0.535760773	0.246080313
15/01/2003 07:00:00	0.40003976	1.016831785
15/01/2003 08:00:00	1.600802893	2.027696888
15/01/2003 09:00:00	2.959928715	3.194117195
15/01/2003 10:00:00	4.370817312	4.431534281
15/01/2003 11:00:00	5.726868771	5.655389716
15/01/2003 12:00:00	6.921483178	6.781125074
15/01/2003 13:00:00	7.84806062	7.724181928
15/01/2003 14:00:00	8.400001185	8.40000185
15/01/2003 15:00:00	8.500354223	8.746139486
15/01/2003 16:00:00	8.190764866	8.788600808
15/01/2003 17:00:00	7.542526871	8.575504388
15/01/2003 18:00:00	6.626933992	8.154968792
15/01/2003 19:00:00	5.515279986	7.575112592
15/01/2003 20:00:00	4.278858608	6.884054354
15/01/2003 21:00:00	2.988963615	6.129912648
15/01/2003 22:00:00	1.716888762	5.360806043
15/01/2003 23:00:00	0.533927805	4.624853108
16/01/2003 00:00:00	-0.4886255	3.970172412
16/01/2003 01:00:00	-1.279477398	3.444882523
16/01/2003 02:00:00	-1.767334131	3.09710201
16/01/2003 03:00:00	-1.880901946	2.974949443
16/01/2003 04:00:00	-1.548887085	3.12654339
16/01/2003 05:00:00	-0.699995792	3.60000242
16/01/2003 06:00:00	0.701999589	4.420557872
16/01/2003 07:00:00	2.55306389	5.521893188
16/01/2003 08:00:00	4.714096624	6.814805093
16/01/2003 09:00:00	7.045997309	8.21009031
16/01/2003 10:00:00	9.409665458	9.618545562
16/01/2003 11:00:00	11.66600059	10.95096757
16/01/2003 12:00:00	13.67590221	12.11815307
16/01/2003 13:00:00	15.30026984	13.03089876
16/01/2003 14:00:00	16.400003	13.60000139
16/01/2003 15:00:00	16.87281595	13.76063093
16/01/2003 16:00:00	16.76368028	13.54544925
16/01/2003 17:00:00	16.15438152	13.01149094
16/01/2003 18:00:00	15.12670516	12.21579058
16/01/2003 19:00:00	13.76243672	11.21538275
16/01/2003 20:00:00	12.14336171	10.06730203
16/01/2003 21:00:00	10.35126564	8.828582995
16/01/2003 22:00:00	8.467934023	7.55626023
16/01/2003 23:00:00	6.575152362	6.307368314
17/01/2003 00:00:00	4.754706172	5.138941827
17/01/2003 01:00:00	3.088380963	4.10801535
17/01/2003 02:00:00	1.657962245	3.271623462
17/01/2003 03:00:00	0.545235528	2.686800744
17/01/2003 04:00:00	-0.168013677	2.410581777
17/01/2003 05:00:00	-0.39999986	2.500001139
17/01/2003 06:00:00	-0.101398161	2.987444041
17/01/2003 07:00:00	0.6472752	3.806699362
17/01/2003 08:00:00	1.733044113	4.866907188
17/01/2003 09:00:00	3.04293247	6.077207608
17/01/2003 10:00:00	4.463964162	7.346740708
17/01/2003 11:00:00	5.88316308	8.584646576
17/01/2003 12:00:00	7.187553116	9.700065298
17/01/2003 13:00:00	8.264158159	10.60213696
17/01/2003 14:00:00	9.000002103	11.20000166
17/01/2003 15:00:00	9.31075432	11.42636168
17/01/2003 16:00:00	9.226664746	11.30816711
17/01/2003 17:00:00	8.806628116	10.89592965
17/01/2003 18:00:00	8.109539165	10.24016103
17/01/2003 19:00:00	7.194292625	9.39137296
17/01/2003 20:00:00	6.119783232	8.400077161
17/01/2003 21:00:00	4.94490572	7.316785352
17/01/2003 22:00:00	3.728554822	6.19200925
17/01/2003 23:00:00	2.529625273	5.076260575
18/01/2003 00:00:00	1.407011808	4.020051044
18/01/2003 01:00:00	0.41960916	3.073892377
18/01/2003 02:00:00	-0.373687937	2.288296291
18/01/2003 03:00:00	-0.913984747	1.713774505
18/01/2003 04:00:00	-1.142386538	1.400838737
18/01/2003 05:00:00	-0.999998574	1.400000706
18/01/2003 06:00:00	-0.453968467	1.739314696
18/01/2003 07:00:00	0.424388072	2.357006364
18/01/2003 08:00:00	1.537713629	3.168844483
18/01/2003 09:00:00	2.78865079	4.09059783
18/01/2003 10:00:00	4.079842139	5.03803518
18/01/2003 11:00:00	5.313930263	5.926925306
18/01/2003 12:00:00	6.393557746	6.673036985
18/01/2003 13:00:00	7.221367175	7.192138992
18/01/2003 14:00:00	7.700001134	7.400000101
18/01/2003 15:00:00	7.758776474	7.236421436
18/01/2003 16:00:00	7.433705766	6.73733231
18/01/2003 17:00:00	6.787475178	5.962693782
18/01/2003 18:00:00	5.882770879	4.972466911
18/01/2003 19:00:00	4.782279037	3.826612757
18/01/2003 20:00:00	3.548685818	2.585092377
18/01/2003 21:00:00	2.244677393	1.307866832
18/01/2003 22:00:00	0.932939928	0.05489718
18/01/2003 23:00:00	-0.323840408	-1.113855519
19/01/2003 00:00:00	-1.462977447	-2.138430206
19/01/2003 01:00:00	-2.421785022	-2.958865823
19/01/2003 02:00:00	-3.137576964	-3.51520131
19/01/2003 03:00:00	-3.547667105	-3.747475608
19/01/2003 04:00:00	-3.589369277	-3.595727658
19/01/2003 05:00:00	-3.199997312	-2.999996401
19/01/2003 06:00:00	-2.345872098	-1.929997944
19/01/2003 07:00:00	-1.109341254	-0.474155525
19/01/2003 08:00:00	0.398241294	1.249431216
19/01/2003 09:00:00	2.065521619	3.122662638
19/01/2003 10:00:00	3.781145792	5.027439102
19/01/2003 11:00:00	5.433759889	6.845660968
19/01/2003 12:00:00	6.912009981	8.459228596
19/01/2003 13:00:00	8.104542142	9.750042346
19/01/2003 14:00:00	8.900002445	10.60000258
19/01/2003 15:00:00	9.217003964	10.92314657
19/01/2003 16:00:00	9.094026201	10.76205759
19/01/2003 17:00:00	8.599514877	10.19145499
19/01/2003 18:00:00	7.801915709	9.286058113
19/01/2003 19:00:00	6.769674418	8.120586298
19/01/2003 20:00:00	5.571236721	6.769758894
19/01/2003 21:00:00	4.275048339	5.308295247
19/01/2003 22:00:00	2.949554989	3.810914702
19/01/2003 23:00:00	1.66320239	2.352336604
20/01/2003 00:00:00	0.484436262	1.007280299
20/01/2003 01:00:00	-0.518297676	-0.149534869
20/01/2003 02:00:00	-1.276553706	-1.043389553
20/01/2003 03:00:00	-1.721886109	-1.599564409
20/01/2003 04:00:00	-1.785849165	-1.743340091
20/01/2003 05:00:00	-1.399997157	-1.399997254
20/01/2003 06:00:00	-0.526622578	-0.527792408
20/01/2003 07:00:00	0.749030876	0.783116295
20/01/2003 08:00:00	2.310982124	2.409595734
20/01/2003 09:00:00	4.043250085	4.22851279
20/01/2003 10:00:00	5.829853677	6.116734341
20/01/2003 11:00:00	7.55481182	7.951127269
20/01/2003 12:00:00	9.102143432	9.608558452
20/01/2003 13:00:00	10.35586743	10.96589477
20/01/2003 14:00:00	11.20000274	11.90000311
20/01/2003 15:00:00	11.54859999	12.31933778
20/01/2003 16:00:00	11.43583503	12.25870114
20/01/2003 17:00:00	10.92591461	11.78448213
20/01/2003 18:00:00	10.08304549	10.96306967
20/01/2003 19:00:00	8.971434394	9.860852704
20/01/2003 20:00:00	7.655288084	8.544220153
20/01/2003 21:00:00	6.198813302	7.079560953
20/01/2003 22:00:00	4.666216796	5.533264035
20/01/2003 23:00:00	3.121705313	3.971718331
21/01/2003 00:00:00	1.6294856	2.461312774
21/01/2003 01:00:00	0.253764404	1.068436294
21/01/2003 02:00:00	-0.94125153	-0.140522176
21/01/2003 03:00:00	-1.891355452	-1.099173705
21/01/2003 04:00:00	-2.532340618	-1.741129361
21/01/2003 05:00:00	-2.800000279	-2.000000212
21/01/2003 06:00:00	-2.65493571	-1.835684555
21/01/2003 07:00:00	-2.156978875	-1.313228126
21/01/2003 08:00:00	-1.390769063	-0.523963152
21/01/2003 09:00:00	-0.440945564	0.44077814
21/01/2003 10:00:00	0.607852334	1.489663522
21/01/2003 11:00:00	1.670985343	2.53136077
21/01/2003 12:00:00	2.663814173	3.474537655
21/01/2003 13:00:00	3.501699535	4.227861951
21/01/2003 14:00:00	4.10000214	4.700001431
21/01/2003 15:00:00	4.396077099	4.824265975
21/01/2003 16:00:00	4.415255866	4.632532485
21/01/2003 17:00:00	4.204863668	4.181319266
21/01/2003 18:00:00	3.812225731	3.527144625
21/01/2003 19:00:00	3.284667282	2.726526868
21/01/2003 20:00:00	2.669513547	1.835984301
21/01/2003 21:00:00	2.014089752	0.91203523
21/01/2003 22:00:00	1.365721125	0.01119796
21/01/2003 23:00:00	0.771732891	-0.810009202
22/01/2003 00:00:00	0.279450277	-1.495067951
22/01/2003 01:00:00	-0.06380149	-1.98745998
22/01/2003 02:00:00	-0.210697184	-2.230666983
22/01/2003 03:00:00	-0.113911578	-2.168170654
22/01/2003 04:00:00	0.273880554	-1.743452688
22/01/2003 05:00:00	1.000004439	-0.899994779
22/01/2003 06:00:00	2.087136547	0.389283492
22/01/2003 07:00:00	3.459359771	2.033712708
22/01/2003 08:00:00	5.016108967	3.913186424
22/01/2003 09:00:00	6.656818992	5.907598199
22/01/2003 10:00:00	8.280924702	7.896841587
22/01/2003 11:00:00	9.787860954	9.760810144
22/01/2003 12:00:00	11.0770626	11.37939743
22/01/2003 13:00:00	12.04796451	12.63249699
22/01/2003 14:00:00	12.60000153	13.4000024
22/01/2003 15:00:00	12.66113262	13.59541687
22/01/2003 16:00:00	12.27341149	13.26668039
22/01/2003 17:00:00	11.5074151	12.49534159
22/01/2003 18:00:00	10.43372041	11.36294912
22/01/2003 19:00:00	9.122904389	9.951051635
22/01/2003 20:00:00	7.64554399	8.341197772
22/01/2003 21:00:00	6.072216179	6.614936182
22/01/2003 22:00:00	4.473497918	4.853815511
22/01/2003 23:00:00	2.919966169	3.139384407
23/01/2003 00:00:00	1.482197895	1.553191516
23/01/2003 01:00:00	0.230770057	0.176785486
23/01/2003 02:00:00	-0.763740382	-0.908285038
23/01/2003 03:00:00	-1.43075646	-1.620471407
23/01/2003 04:00:00	-1.699701214	-1.878224976
23/01/2003 05:00:00	-1.499997683	-1.599997096
23/01/2003 06:00:00	-0.79183983	-0.739738561
23/01/2003 07:00:00	0.341496546	0.606604239
23/01/2003 08:00:00	1.785965657	2.307586552
23/01/2003 09:00:00	3.427521713	4.231763629
23/01/2003 10:00:00	5.152118925	6.247690716
23/01/2003 11:00:00	6.845711504	8.223923062
23/01/2003 12:00:00	8.394253661	10.02901592
23/01/2003 13:00:00	9.683699607	11.53152453
23/01/2003 14:00:00	10.60000355	12.60000415
23/01/2003 15:00:00	11.05850787	13.13662197
23/01/2003 16:00:00	11.09210576	13.17799096
23/01/2003 17:00:00	10.76307768	12.79433496
23/01/2003 18:00:00	10.1337041	12.05587784
23/01/2003 19:00:00	9.26626546	11.03284348
23/01/2003 20:00:00	8.223042229	9.795455724
23/01/2003 21:00:00	7.066314864	8.413938448
23/01/2003 22:00:00	5.858363821	6.958515515
23/01/2003 23:00:00	4.66146956	5.499410788
24/01/2003 00:00:00	3.537912538	4.106848133
24/01/2003 01:00:00	2.549973213	2.851051414
24/01/2003 02:00:00	1.759932044	1.802244495
24/01/2003 03:00:00	1.230069489	1.030651241
24/01/2003 04:00:00	1.022666006	0.606495517
24/01/2003 05:00:00	1.200002052	0.600001187
24/01/2003 06:00:00	1.7977657	1.052827586
24/01/2003 07:00:00	2.74527715	1.892377735
24/01/2003 08:00:00	3.945265053	3.017491028
24/01/2003 09:00:00	5.300458063	4.327006856
24/01/2003 10:00:00	6.713584831	5.719764612
24/01/2003 11:00:00	8.087374009	7.094603689
24/01/2003 12:00:00	9.324554249	8.350363479
24/01/2003 13:00:00	10.3278542	9.385883375
24/01/2003 14:00:00	11.00000253	10.10000277
24/01/2003 15:00:00	11.26891357	10.41732306
24/01/2003 16:00:00	11.16324291	10.36549204
24/01/2003 17:00:00	10.736831	9.997918677
24/01/2003 18:00:00	10.04351831	9.368011941
24/01/2003 19:00:00	9.137145311	8.529180804
24/01/2003 20:00:00	8.071552463	7.534834237
24/01/2003 21:00:00	6.900580235	6.438381212
24/01/2003 22:00:00	5.67806909	5.293230699
24/01/2003 23:00:00	4.457859496	4.15279167
25/01/2003 00:00:00	3.293791918	3.070473095
25/01/2003 01:00:00	2.239706822	2.099683946
25/01/2003 02:00:00	1.349444674	1.293833195
25/01/2003 03:00:00	0.676845938	0.706329811
25/01/2003 04:00:00	0.275751082	0.390582768
25/01/2003 05:00:00	0.200000571	0.400001034
25/01/2003 06:00:00	0.481565669	0.766141849
25/01/2003 07:00:00	1.064942265	1.433156945
25/01/2003 08:00:00	1.87275776	2.323347037
25/01/2003 09:00:00	2.827639557	3.359012839
25/01/2003 10:00:00	3.852215056	4.462455064
25/01/2003 11:00:00	4.86911166	5.555974427
25/01/2003 12:00:00	5.800956771	6.561871642
25/01/2003 13:00:00	6.57037779	7.402447423
25/01/2003 14:00:00	7.100002119	8.000002485
25/01/2003 15:00:00	7.332115125	8.296196261
25/01/2003 16:00:00	7.287632727	8.310121787
25/01/2003 17:00:00	7.007128159	8.080230177
25/01/2003 18:00:00	6.531174654	7.644972545
25/01/2003 19:00:00	5.900345447	7.042800005
25/01/2003 20:00:00	5.15521377	6.312163671
25/01/2003 21:00:00	4.336352857	5.491514659
25/01/2003 22:00:00	3.484335941	4.619304081
25/01/2003 23:00:00	2.639736257	3.733983052
26/01/2003 00:00:00	1.843127037	2.874002686
26/01/2003 01:00:00	1.135081515	2.077814098
26/01/2003 02:00:00	0.556172924	1.383868401
26/01/2003 03:00:00	0.146974499	0.83061671
26/01/2003 04:00:00	-0.051940528	0.45651014
26/01/2003 05:00:00	1.07667E-06	0.299999803
26/01/2003 06:00:00	0.32588174	0.384409468
26/01/2003 07:00:00	0.878821847	0.672554535
26/01/2003 08:00:00	1.594451565	1.112123572
26/01/2003 09:00:00	2.408401063	1.650805145
26/01/2003 10:00:00	3.256300511	2.236287819
26/01/2003 11:00:00	4.073780078	2.816260161
26/01/2003 12:00:00	4.796469933	3.338410739
26/01/2003 13:00:00	5.360000244	3.750428117
26/01/2003 14:00:00	5.700001181	4.000000862
26/01/2003 15:00:00	5.769494301	4.048809333
26/01/2003 16:00:00	5.591065523	3.914500094
26/01/2003 17:00:00	5.204691558	3.628711025
26/01/2003 18:00:00	4.650349117	3.223080001
26/01/2003 19:00:00	3.968014912	2.729244902
26/01/2003 20:00:00	3.197665653	2.178843605
26/01/2003 21:00:00	2.379278051	1.603513988
26/01/2003 22:00:00	1.552828818	1.034893928
26/01/2003 23:00:00	0.758294666	0.504621304
27/01/2003 00:00:00	0.035652304	0.044333992
27/01/2003 01:00:00	-0.575121556	-0.314330129
27/01/2003 02:00:00	-1.034050202	-0.539733181
27/01/2003 03:00:00	-1.301156924	-0.600237287
27/01/2003 04:00:00	-1.336465011	-0.464204569
27/01/2003 05:00:00	-1.099997751	-0.099997149
27/01/2003 06:00:00	-0.571194722	0.507608356
27/01/2003 07:00:00	0.192840696	1.308178501
27/01/2003 08:00:00	1.115589517	2.234865919
27/01/2003 09:00:00	2.120532752	3.220823246
27/01/2003 10:00:00	3.131151412	4.199203116
27/01/2003 11:00:00	4.07092651	5.103158162
27/01/2003 12:00:00	4.863339057	5.86584102
27/01/2003 13:00:00	5.431870065	6.420404324
27/01/2003 14:00:00	5.700000546	6.700000707
27/01/2003 15:00:00	5.61362937	6.65765226
27/01/2003 16:00:00	5.208325257	6.325857475
27/01/2003 17:00:00	4.542073988	5.7569836
27/01/2003 18:00:00	3.672861349	5.00339788
27/01/2003 19:00:00	2.658673121	4.117467559
27/01/2003 20:00:00	1.557495088	3.151559883
27/01/2003 21:00:00	0.427313033	2.158042098
27/01/2003 22:00:00	-0.673887261	1.189281449
27/01/2003 23:00:00	-1.68812001	0.297645181
28/01/2003 00:00:00	-2.557399431	-0.46449946
28/01/2003 01:00:00	-3.223739741	-1.044785228
28/01/2003 02:00:00	-3.629155156	-1.39084488
28/01/2003 03:00:00	-3.715659894	-1.450311168
28/01/2003 04:00:00	-3.425268171	-1.170816848
28/01/2003 05:00:00	-2.699994205	-0.499994675
28/01/2003 06:00:00	-1.511571239	0.587378469
28/01/2003 07:00:00	0.049393517	2.007951153
28/01/2003 08:00:00	1.862574899	3.651228798
28/01/2003 09:00:00	3.807647744	5.406716825
28/01/2003 10:00:00	5.764286889	7.163920657
28/01/2003 11:00:00	7.61216717	8.812345713
28/01/2003 12:00:00	9.230963425	10.24149742
28/01/2003 13:00:00	10.50035049	11.34088119
28/01/2003 14:00:00	11.3000032	12.00000245
28/01/2003 15:00:00	11.54245456	12.13882077
28/01/2003 16:00:00	11.27166789	11.79911009
28/01/2003 17:00:00	10.56446343	11.05309736
28/01/2003 18:00:00	9.497661475	9.973009564
28/01/2003 19:00:00	8.148082283	8.631073661
28/01/2003 20:00:00	6.592546128	7.09951662
28/01/2003 21:00:00	4.907873279	5.450565408
28/01/2003 22:00:00	3.170884007	3.756446993
28/01/2003 23:00:00	1.458398582	2.089388342
29/01/2003 00:00:00	-0.152762725	0.521616423
29/01/2003 01:00:00	-1.585779644	-0.874641797
29/01/2003 02:00:00	-2.763831905	-2.027159352
29/01/2003 03:00:00	-3.610099237	-2.863709273
29/01/2003 04:00:00	-4.047761371	-3.312064593
29/01/2003 05:00:00	-3.999998035	-3.299998344
29/01/2003 06:00:00	-3.421470082	-2.784975429
29/01/2003 07:00:00	-2.392760502	-1.843226006
29/01/2003 08:00:00	-1.025932234	-0.580670996
29/01/2003 09:00:00	0.566951784	0.896768681
29/01/2003 10:00:00	2.273828613	2.483172103
29/01/2003 11:00:00	3.982635314	4.072618352
29/01/2003 12:00:00	5.581308949	5.559186505
29/01/2003 13:00:00	6.95778658	6.836955643
29/01/2003 14:00:00	8.000005268	7.800004844
29/01/2003 15:00:00	8.6230968	8.368353461
29/01/2003 16:00:00	8.850969817	8.565779974
29/01/2003 17:00:00	8.734726661	8.442002157
29/01/2003 18:00:00	8.325469671	8.046737784
29/01/2003 19:00:00	7.674301189	7.429704629
29/01/2003 20:00:00	6.832323556	6.640620466
29/01/2003 21:00:00	5.850639113	5.729203069
29/01/2003 22:00:00	4.780350201	4.745170212
29/01/2003 23:00:00	3.67255916	3.738239669
30/01/2003 00:00:00	2.578368331	2.758129214
30/01/2003 01:00:00	1.548880056	1.854556621
30/01/2003 02:00:00	0.635196675	1.077239663
30/01/2003 03:00:00	-0.11157947	0.475896116
30/01/2003 04:00:00	-0.64034604	0.100243752
30/01/2003 05:00:00	-0.900000692	3.46249E-07
30/01/2003 06:00:00	-0.857829642	0.205960656
30/01/2003 07:00:00	-0.554671909	0.673228831
30/01/2003 08:00:00	-0.049754361	1.337986731
30/01/2003 09:00:00	0.597696134	2.136416218
30/01/2003 10:00:00	1.328452708	3.004699151
30/01/2003 11:00:00	2.083288493	3.879017391
30/01/2003 12:00:00	2.80297662	4.6955528
30/01/2003 13:00:00	3.428290222	5.390487237
30/01/2003 14:00:00	3.900002431	5.900002563
30/01/2003 15:00:00	4.172821669	6.175570959
30/01/2003 16:00:00	4.257196435	6.229824698
30/01/2003 17:00:00	4.177509979	6.090685778
30/01/2003 18:00:00	3.958145548	5.786076196
30/01/2003 19:00:00	3.623486391	5.343917952
30/01/2003 20:00:00	3.197915756	4.792133043
30/01/2003 21:00:00	2.705816891	4.158643468
30/01/2003 22:00:00	2.171573045	3.471371225
30/01/2003 23:00:00	1.619567467	2.758238312
31/01/2003 00:00:00	1.074183403	2.047166727
31/01/2003 01:00:00	0.559804104	1.366078469
31/01/2003 02:00:00	0.100812816	0.742895536
31/01/2003 03:00:00	-0.27840721	0.205539926
31/01/2003 04:00:00	-0.553472728	-0.218066363
31/01/2003 05:00:00	-0.700000489	-0.500001332
31/01/2003 06:00:00	-0.703605618	-0.622281324
31/01/2003 07:00:00	-0.589895939	-0.606675256
31/01/2003 08:00:00	-0.394477254	-0.484889993
31/01/2003 09:00:00	-0.152955365	-0.2886324
31/01/2003 10:00:00	0.099063925	-0.04960934
31/01/2003 11:00:00	0.325974816	0.200472321
31/01/2003 12:00:00	0.492171504	0.42990572
31/01/2003 13:00:00	0.562048188	0.606983991
31/01/2003 14:00:00	0.499999067	0.70000027
31/01/2003 15:00:00	0.281521889	0.68591537
31/01/2003 16:00:00	-0.073472281	0.576360123
31/01/2003 17:00:00	-0.533969269	0.39163269
31/01/2003 18:00:00	-1.068954904	0.152031234
31/01/2003 19:00:00	-1.647415013	-0.122146084
31/01/2003 20:00:00	-2.238335425	-0.410601101
31/01/2003 21:00:00	-2.810701966	-0.693035656
31/01/2003 22:00:00	-3.333500466	-0.949151587
31/01/2003 23:00:00	-3.775716752	-1.158650731
01/02/2003 00:00:00	-4.10633665	-1.301234927
01/02/2003 01:00:00	-4.294345991	-1.356606012
01/02/2003 02:00:00	-4.3087306	-1.304465825
01/02/2003 03:00:00	-4.118476306	-1.124516204
01/02/2003 04:00:00	-3.692568937	-0.796458986
01/02/2003 05:00:00	-2.99999432	-0.29999601
01/02/2003 06:00:00	-2.028052113	0.37255663
01/02/2003 07:00:00	-0.837295795	1.178426842
01/02/2003 08:00:00	0.493408069	2.062228793
01/02/2003 09:00:00	1.885192918	2.968576647
01/02/2003 10:00:00	3.259192187	3.842084572
01/02/2003 11:00:00	4.536539313	4.627366733
01/02/2003 12:00:00	5.638367734	5.269037296
01/02/2003 13:00:00	6.485810886	5.711710427
01/02/2003 14:00:00	7.000002205	5.900000293
01/02/2003 15:00:00	7.124714562	5.795429239
01/02/2003 16:00:00	6.894276687	5.427150946
01/02/2003 17:00:00	6.365655813	4.841226578
01/02/2003 18:00:00	5.595819172	4.083717299
01/02/2003 19:00:00	4.641733996	3.200684272
01/02/2003 20:00:00	3.560367517	2.238188663
01/02/2003 21:00:00	2.408686966	1.242291635
01/02/2003 22:00:00	1.243659576	0.259054353
01/02/2003 23:00:00	0.122252579	-0.66546202
02/02/2003 00:00:00	-0.898566794	-1.485196319
02/02/2003 01:00:00	-1.76183131	-2.154087381
02/02/2003 02:00:00	-2.410573738	-2.62607404
02/02/2003 03:00:00	-2.787826845	-2.855095133
02/02/2003 04:00:00	-2.8366234	-2.795089495
02/02/2003 05:00:00	-2.49999617	-2.399995963
02/02/2003 06:00:00	-1.746319011	-1.645200807
02/02/2003 07:00:00	-0.645327995	-0.591878237
02/02/2003 08:00:00	0.707900778	0.677351001
02/02/2003 09:00:00	2.218291209	2.07986616
02/02/2003 10:00:00	3.7907672	3.533046496
02/02/2003 11:00:00	5.330252653	4.954271261
02/02/2003 12:00:00	6.741671468	6.260919709
02/02/2003 13:00:00	7.929947548	7.370371095
02/02/2003 14:00:00	8.800004793	8.200004672
02/02/2003 15:00:00	9.281474896	8.688449223
02/02/2003 16:00:00	9.402818621	8.859329837
02/02/2003 17:00:00	9.217203477	8.757520235
02/02/2003 18:00:00	8.777796974	8.427894136
02/02/2003 19:00:00	8.13776662	7.915325259
02/02/2003 20:00:00	7.350279925	7.264687324
02/02/2003 21:00:00	6.468504397	6.52085405
02/02/2003 22:00:00	5.545607546	5.728699156
02/02/2003 23:00:00	4.634756881	4.933096361
03/02/2003 00:00:00	3.789119912	4.178919385
03/02/2003 01:00:00	3.061864146	3.511041948
03/02/2003 02:00:00	2.506157094	2.974337768
03/02/2003 03:00:00	2.175166265	2.613680565
03/02/2003 04:00:00	2.122059167	2.473944057
03/02/2003 05:00:00	2.40000331	2.600001966
03/02/2003 06:00:00	3.038199429	3.016838142
03/02/2003 07:00:00	3.969983229	3.669878687
03/02/2003 08:00:00	5.104724673	4.484660691
03/02/2003 09:00:00	6.351793725	5.386721244
03/02/2003 10:00:00	7.620560347	6.301597435
03/02/2003 11:00:00	8.820394503	7.154826356
03/02/2003 12:00:00	9.860666155	7.871945095
03/02/2003 13:00:00	10.65074527	8.378490744
03/02/2003 14:00:00	11.1000018	8.600000393
03/02/2003 15:00:00	11.14304721	8.483468295
03/02/2003 16:00:00	10.81545669	8.061715495
03/02/2003 17:00:00	10.17804584	7.38901927
03/02/2003 18:00:00	9.291630244	6.519656894
03/02/2003 19:00:00	8.217025494	5.507905643
03/02/2003 20:00:00	7.015047183	4.408042793
03/02/2003 21:00:00	5.7465109	3.274345619
03/02/2003 22:00:00	4.472232236	2.161091398
03/02/2003 23:00:00	3.253026782	1.122557404
04/02/2003 00:00:00	2.14971013	0.213020913
04/02/2003 01:00:00	1.223097869	-0.513240798
04/02/2003 02:00:00	0.53400559	-1.001950455
04/02/2003 03:00:00	0.143248885	-1.198830782
04/02/2003 04:00:00	0.111643344	-1.049604503
04/02/2003 05:00:00	0.500004558	-0.499994342
04/02/2003 06:00:00	1.340027752	0.476814818
04/02/2003 07:00:00	2.546929263	1.797791895
04/02/2003 08:00:00	4.006806351	3.352444862
04/02/2003 09:00:00	5.605756274	5.030281692
04/02/2003 10:00:00	7.22987629	6.720810359
04/02/2003 11:00:00	8.76526366	8.313538836
04/02/2003 12:00:00	10.09801564	9.697975097
04/02/2003 13:00:00	11.11422949	10.76362711
04/02/2003 14:00:00	11.70000247	11.40000286
04/02/2003 15:00:00	11.77281625	11.52721898
04/02/2003 16:00:00	11.37568734	11.18782404
04/02/2003 17:00:00	10.58301523	10.45497391
04/02/2003 18:00:00	9.469199454	9.401824455
04/02/2003 19:00:00	8.108639517	8.10153155
04/02/2003 20:00:00	6.575734931	6.627251063
04/02/2003 21:00:00	4.94488521	5.052138862
04/02/2003 22:00:00	3.290489866	3.449350817
04/02/2003 23:00:00	1.686948411	1.892042799
05/02/2003 00:00:00	0.208660358	0.453370676
05/02/2003 01:00:00	-1.06997478	-0.793509683
05/02/2003 02:00:00	-2.074557491	-1.775442407
05/02/2003 03:00:00	-2.730688262	-2.419271628
05/02/2003 04:00:00	-2.963967582	-2.651841475
05/02/2003 05:00:00	-2.699995937	-2.399996081
05/02/2003 06:00:00	-1.896923108	-1.62355145
05/02/2003 07:00:00	-0.643093091	-0.414208104
05/02/2003 08:00:00	0.940602301	1.103363058
05/02/2003 09:00:00	2.733271255	2.804491134
05/02/2003 10:00:00	4.614021958	4.564505224
05/02/2003 11:00:00	6.461962597	6.258734429
05/02/2003 12:00:00	8.156201358	7.762507847
05/02/2003 13:00:00	9.57584643	8.951154577
05/02/2003 14:00:00	10.600006	9.70000372
05/02/2003 15:00:00	11.13922664	9.91822782
05/02/2003 16:00:00	11.22980562	9.650370107
05/02/2003 17:00:00	10.93947713	8.974815704
05/02/2003 18:00:00	10.3359754	7.969949737
05/02/2003 19:00:00	9.487034617	6.71415733
05/02/2003 20:00:00	8.460388999	5.285823609
05/02/2003 21:00:00	7.323772754	3.763333696
05/02/2003 22:00:00	6.144920088	2.225072718
05/02/2003 23:00:00	4.991565209	0.749425799
06/02/2003 00:00:00	3.931442326	-0.585221936
06/02/2003 01:00:00	3.032285646	-1.700485364
06/02/2003 02:00:00	2.361829378	-2.517979359
06/02/2003 03:00:00	1.987807729	-2.959318796
06/02/2003 04:00:00	1.977954907	-2.94611855
06/02/2003 05:00:00	2.400005121	-2.399993498
06/02/2003 06:00:00	3.291225234	-1.277168675
06/02/2003 07:00:00	4.567015574	0.327693463
06/02/2003 08:00:00	6.11231054	2.285321909
06/02/2003 09:00:00	7.812044532	4.466445656
06/02/2003 10:00:00	9.55115195	6.741793695
06/02/2003 11:00:00	11.2145672	8.982095021
06/02/2003 12:00:00	12.68722467	11.05807863
06/02/2003 13:00:00	13.85405876	12.8404735
06/02/2003 14:00:00	14.60000389	14.20000865
06/02/2003 15:00:00	14.84085796	15.03960765
06/02/2003 16:00:00	14.6158701	15.39096953
06/02/2003 17:00:00	13.99515149	15.31798637
06/02/2003 18:00:00	13.04881333	14.88455028
06/02/2003 19:00:00	11.8469668	14.15455336
06/02/2003 20:00:00	10.45972308	13.1918877
06/02/2003 21:00:00	8.957193378	12.0604454
06/02/2003 22:00:00	7.409488871	10.82411857
06/02/2003 23:00:00	5.886720752	9.546799308
07/02/2003 00:00:00	4.459000208	8.292379703
07/02/2003 01:00:00	3.19643843	7.12475186
07/02/2003 02:00:00	2.169146605	6.107807878
07/02/2003 03:00:00	1.447235923	5.305439855
07/02/2003 04:00:00	1.100817573	4.781539892
07/02/2003 05:00:00	1.200002744	4.600000087
07/02/2003 06:00:00	1.784979947	4.798903289
07/02/2003 07:00:00	2.776249839	5.313097801
07/02/2003 08:00:00	4.064391825	6.051623907
07/02/2003 09:00:00	5.539985312	6.92352189
07/02/2003 10:00:00	7.093609705	7.837832033
07/02/2003 11:00:00	8.61584441	8.703594619
07/02/2003 12:00:00	9.997268832	9.429849931
07/02/2003 13:00:00	11.12846238	9.925638252
07/02/2003 14:00:00	11.90000445	10.09999987
07/02/2003 15:00:00	12.23127245	9.887844791
07/02/2003 16:00:00	12.15683299	9.327559497
07/02/2003 17:00:00	11.74004929	8.483398947
07/02/2003 18:00:00	11.04428456	7.419618101
07/02/2003 19:00:00	10.13290202	6.200471921
07/02/2003 20:00:00	9.069264899	4.89021537
07/02/2003 21:00:00	7.916736402	3.553103409
07/02/2003 22:00:00	6.738679752	2.253390999
07/02/2003 23:00:00	5.598458169	1.055333102
08/02/2003 00:00:00	4.559434869	0.02318468
08/02/2003 01:00:00	3.684973071	-0.778799306
08/02/2003 02:00:00	3.038435994	-1.286363894
08/02/2003 03:00:00	2.683186856	-1.435254121
08/02/2003 04:00:00	2.682588874	-1.161215027
08/02/2003 05:00:00	3.100005268	-0.399991651
08/02/2003 06:00:00	3.969549887	0.880603919
08/02/2003 07:00:00	5.208341962	2.584494516
08/02/2003 08:00:00	6.704252783	4.583537485
08/02/2003 09:00:00	8.345153639	6.749590175
08/02/2003 10:00:00	10.01891582	8.954509931
08/02/2003 11:00:00	11.61341062	11.0701541
08/02/2003 12:00:00	13.01650932	12.96838003
08/02/2003 13:00:00	14.11608322	14.52104507
08/02/2003 14:00:00	14.8000036	15.60000656
08/02/2003 15:00:00	14.98617716	16.11098841
08/02/2003 16:00:00	14.7126492	16.09517742
08/02/2003 17:00:00	14.04749898	15.62762526
08/02/2003 18:00:00	13.05880572	14.78338362
08/02/2003 19:00:00	11.81464867	13.63750419
08/02/2003 20:00:00	10.38310706	12.26503865
08/02/2003 21:00:00	8.83226012	10.74103868
08/02/2003 22:00:00	7.230187099	9.140555979
08/02/2003 23:00:00	5.644967231	7.538642218
09/02/2003 00:00:00	4.144679752	6.010349084
09/02/2003 01:00:00	2.7974039	4.630728263
09/02/2003 02:00:00	1.671218913	3.474831439
09/02/2003 03:00:00	0.834204026	2.617710296
09/02/2003 04:00:00	0.354438479	2.134416519
09/02/2003 05:00:00	0.300001507	2.100001791
09/02/2003 06:00:00	0.710051368	2.558003583
09/02/2003 07:00:00	1.508065293	3.42590566
09/02/2003 08:00:00	2.588600977	4.589679146
09/02/2003 09:00:00	3.846216114	5.935295165
09/02/2003 10:00:00	5.175468401	7.348724842
09/02/2003 11:00:00	6.470915533	8.715939301
09/02/2003 12:00:00	7.627115205	9.922909668
09/02/2003 13:00:00	8.538625112	10.85560707
09/02/2003 14:00:00	9.10000295	11.40000262
09/02/2003 15:00:00	9.23288733	11.47165924
09/02/2003 16:00:00	8.967237803	11.10450399
09/02/2003 17:00:00	8.36009347	10.3620542
09/02/2003 18:00:00	7.468493431	9.307827244
09/02/2003 19:00:00	6.349476789	8.00534046
09/02/2003 20:00:00	5.060082644	6.518111201
09/02/2003 21:00:00	3.657350097	4.909656818
09/02/2003 22:00:00	2.198318251	3.243494661
09/02/2003 23:00:00	0.740026207	1.583142081
10/02/2003 00:00:00	-0.660486935	-0.007883572
10/02/2003 01:00:00	-1.946182073	-1.466064947
10/02/2003 02:00:00	-3.060020106	-2.727884693
10/02/2003 03:00:00	-3.944961932	-3.72982546
10/02/2003 04:00:00	-4.54396845	-4.408369898
10/02/2003 05:00:00	-4.800000558	-4.700000656
10/02/2003 06:00:00	-4.679395557	-4.566395465
10/02/2003 07:00:00	-4.241993961	-4.070009808
10/02/2003 08:00:00	-3.571011489	-3.29849296
10/02/2003 09:00:00	-2.749663861	-2.339494197
10/02/2003 10:00:00	-1.861166797	-1.280662796
10/02/2003 11:00:00	-0.988736018	-0.209648033
10/02/2003 12:00:00	-0.215587244	0.785900816
10/02/2003 13:00:00	0.375063806	1.618334476
10/02/2003 14:00:00	0.700001412	2.200003669
10/02/2003 15:00:00	0.697846894	2.464790958
10/02/2003 16:00:00	0.394567486	2.432704033
10/02/2003 17:00:00	-0.162033664	2.145281309
10/02/2003 18:00:00	-0.924153407	1.644061205
10/02/2003 19:00:00	-1.843988596	0.970582137
10/02/2003 20:00:00	-2.873736081	0.166382522
10/02/2003 21:00:00	-3.965592715	-0.726999222
10/02/2003 22:00:00	-5.071755348	-1.668024679
10/02/2003 23:00:00	-6.144420833	-2.615155431
11/02/2003 00:00:00	-7.135786021	-3.526853061
11/02/2003 01:00:00	-7.998047764	-4.361579153
11/02/2003 02:00:00	-8.683402913	-5.077795289
11/02/2003 03:00:00	-9.14404832	-5.633963052
11/02/2003 04:00:00	-9.332180837	-5.988544025
11/02/2003 05:00:00	-9.199997314	-6.099999791
11/02/2003 06:00:00	-8.721082471	-5.944201626
11/02/2003 07:00:00	-7.954570255	-5.566657756
11/02/2003 08:00:00	-6.980981363	-5.03028519
11/02/2003 09:00:00	-5.880836492	-4.398000936
11/02/2003 10:00:00	-4.734656339	-3.732722004
11/02/2003 11:00:00	-3.6229616	-3.097365402
11/02/2003 12:00:00	-2.626272972	-2.55484814
11/02/2003 13:00:00	-1.825111151	-2.168087225
11/02/2003 14:00:00	-1.299996836	-1.999999668
11/02/2003 15:00:00	-1.109552978	-2.095575202
11/02/2003 16:00:00	-1.224813873	-2.428096355
11/02/2003 17:00:00	-1.594917224	-2.952919325
11/02/2003 18:00:00	-2.169000735	-3.625400308
11/02/2003 19:00:00	-2.896202112	-4.400895503
11/02/2003 20:00:00	-3.725659058	-5.234761106
11/02/2003 21:00:00	-4.606509279	-6.082353317
11/02/2003 22:00:00	-5.487890479	-6.899028331
11/02/2003 23:00:00	-6.318940362	-7.640142348
12/02/2003 00:00:00	-7.048796633	-8.261051564
12/02/2003 01:00:00	-7.626596997	-8.717112177
12/02/2003 02:00:00	-8.001479157	-8.963680385
12/02/2003 03:00:00	-8.12258082	-8.956112385
12/02/2003 04:00:00	-7.939039688	-8.649764375
12/02/2003 05:00:00	-7.399993467	-7.999992553
12/02/2003 06:00:00	-6.47823121	-6.984057951
12/02/2003 07:00:00	-5.241144838	-5.6668386
12/02/2003 08:00:00	-3.779776361	-4.135116197
12/02/2003 09:00:00	-2.185167785	-2.475672439
12/02/2003 10:00:00	-0.548361117	-0.775289022
12/02/2003 11:00:00	1.039601634	0.879252358
12/02/2003 12:00:00	2.487678462	2.401170004
12/02/2003 13:00:00	3.704827359	3.70368222
12/02/2003 14:00:00	4.600006318	4.700007309
12/02/2003 15:00:00	5.105853116	5.325470539
12/02/2003 16:00:00	5.249722127	5.603822648
12/02/2003 17:00:00	5.082646233	5.580920147
12/02/2003 18:00:00	4.655658317	5.302619548
12/02/2003 19:00:00	4.019791261	4.814777362
12/02/2003 20:00:00	3.226077949	4.1632501
12/02/2003 21:00:00	2.325551264	3.393894274
12/02/2003 22:00:00	1.369244087	2.552566395
12/02/2003 23:00:00	0.408189303	1.685122975
13/02/2003 00:00:00	-0.506580206	0.837420524
13/02/2003 01:00:00	-1.324031557	0.055315555
13/02/2003 02:00:00	-1.993131868	-0.615335422
13/02/2003 03:00:00	-2.462848255	-1.128675895
13/02/2003 04:00:00	-2.682147836	-1.438849353
13/02/2003 05:00:00	-2.599997727	-1.499999285
13/02/2003 06:00:00	-2.185290096	-1.283446592
13/02/2003 07:00:00	-1.486615135	-0.829219954
13/02/2003 08:00:00	-0.572486996	-0.194524529
13/02/2003 09:00:00	0.488580165	0.563434527
13/02/2003 10:00:00	1.628072196	1.387452059
13/02/2003 11:00:00	2.777474943	2.22032291
13/02/2003 12:00:00	3.868274251	3.004841923
13/02/2003 13:00:00	4.831955966	3.683803942
13/02/2003 14:00:00	5.600005935	4.200003812
13/02/2003 15:00:00	6.119982914	4.510010939
13/02/2003 16:00:00	6.403735528	4.625491477
13/02/2003 17:00:00	6.479184427	4.571885382
13/02/2003 18:00:00	6.374250263	4.374632614
13/02/2003 19:00:00	6.116853686	4.059173131
13/02/2003 20:00:00	5.734915347	3.650946891
13/02/2003 21:00:00	5.256355897	3.175393852
13/02/2003 22:00:00	4.709095986	2.657953974
13/02/2003 23:00:00	4.121056266	2.124067213
14/02/2003 00:00:00	3.520157387	1.599173529
14/02/2003 01:00:00	2.93432	1.108712879
14/02/2003 02:00:00	2.391464755	0.678125223
14/02/2003 03:00:00	1.919512305	0.332850519
14/02/2003 04:00:00	1.546383298	0.098328724
14/02/2003 05:00:00	1.299998387	-2.02045E-07
14/02/2003 06:00:00	1.198822671	0.053918953
14/02/2003 07:00:00	1.223500104	0.238603466
14/02/2003 08:00:00	1.345219618	0.523186393
14/02/2003 09:00:00	1.535170142	0.876800788
14/02/2003 10:00:00	1.764540606	1.268579707
14/02/2003 11:00:00	2.004519942	1.667656203
14/02/2003 12:00:00	2.226297079	2.043163333
14/02/2003 13:00:00	2.401060949	2.364234151
14/02/2003 14:00:00	2.500000481	2.600001711
14/02/2003 15:00:00	2.501980766	2.727359095
14/02/2003 16:00:00	2.416570667	2.754238615
14/02/2003 17:00:00	2.261014777	2.696332171
14/02/2003 18:00:00	2.052557688	2.569331666
14/02/2003 19:00:00	1.808443992	2.388929002
14/02/2003 20:00:00	1.545918283	2.170816079
14/02/2003 21:00:00	1.282225151	1.9306848
14/02/2003 22:00:00	1.034609191	1.684227067
14/02/2003 23:00:00	0.820314993	1.447134781
15/02/2003 00:00:00	0.65658715	1.235099844
15/02/2003 01:00:00	0.560670256	1.063814157
15/02/2003 02:00:00	0.549808901	0.948969623
15/02/2003 03:00:00	0.641247678	0.906258142
15/02/2003 04:00:00	0.85223118	0.951371617
15/02/2003 05:00:00	1.200004	1.100001949
15/02/2003 06:00:00	1.692165992	1.360453891
15/02/2003 07:00:00	2.297739168	1.711484433
15/02/2003 08:00:00	2.976101348	2.12446384
15/02/2003 09:00:00	3.686630355	2.570762374
15/02/2003 10:00:00	4.38870401	3.021750297
15/02/2003 11:00:00	5.041700136	3.448797872
15/02/2003 12:00:00	5.604996555	3.823275362
15/02/2003 13:00:00	6.037971088	4.116553029
15/02/2003 14:00:00	6.300001557	4.300001137
15/02/2003 15:00:00	6.362467858	4.353403816
15/02/2003 16:00:00	6.244756806	4.290199714
15/02/2003 17:00:00	5.9782566	4.132240866
15/02/2003 18:00:00	5.594355442	3.901379305
15/02/2003 19:00:00	5.12444153	3.619467065
15/02/2003 20:00:00	4.599903065	3.30835618
15/02/2003 21:00:00	4.052128247	2.989898685
15/02/2003 22:00:00	3.512505278	2.685946613
15/02/2003 23:00:00	3.012422355	2.418352
16/02/2003 00:00:00	2.583267681	2.208966878
16/02/2003 01:00:00	2.256429455	2.079643282
16/02/2003 02:00:00	2.063295877	2.052233246
16/02/2003 03:00:00	2.035255148	2.148588804
16/02/2003 04:00:00	2.203695468	2.390561991
16/02/2003 05:00:00	2.600005036	2.80000484
16/02/2003 06:00:00	3.239247958	3.386112392
16/02/2003 07:00:00	4.07119385	4.107453178
16/02/2003 08:00:00	5.029289179	4.909939471
16/02/2003 09:00:00	6.046980414	5.739483544
16/02/2003 10:00:00	7.057714022	6.541997668
16/02/2003 11:00:00	7.994936471	7.263394117
16/02/2003 12:00:00	8.792094229	7.849585163
16/02/2003 13:00:00	9.382633765	8.246483078
16/02/2003 14:00:00	9.700001545	8.400000134
16/02/2003 15:00:00	9.697045013	8.272873541
16/02/2003 16:00:00	9.404213236	7.895138284
16/02/2003 17:00:00	8.871355125	7.313653299
16/02/2003 18:00:00	8.148319588	6.575277526
16/02/2003 19:00:00	7.284955535	5.726869901
16/02/2003 20:00:00	6.331111875	4.815289362
16/02/2003 21:00:00	5.336637517	3.887394848
16/02/2003 22:00:00	4.351381369	2.990045295
16/02/2003 23:00:00	3.425192342	2.170099642
17/02/2003 00:00:00	2.607919345	1.474416826
17/02/2003 01:00:00	1.949411285	0.949855785
17/02/2003 02:00:00	1.499517074	0.643275456
17/02/2003 03:00:00	1.308085619	0.601534777
17/02/2003 04:00:00	1.42496583	0.871492687
17/02/2003 05:00:00	1.900006616	1.500008122
17/02/2003 06:00:00	2.75875218	2.510038905
17/02/2003 07:00:00	3.929530774	3.828941226
17/02/2003 08:00:00	5.316367385	5.360171573
17/02/2003 09:00:00	6.823286995	7.007186436
17/02/2003 10:00:00	8.354314592	8.673442303
17/02/2003 11:00:00	9.813475158	10.26239566
17/02/2003 12:00:00	11.10479368	11.677503
17/02/2003 13:00:00	12.13229514	12.82222081
17/02/2003 14:00:00	12.80000453	13.60000559
17/02/2003 15:00:00	13.03838383	13.94077818
17/02/2003 16:00:00	12.88363993	13.88031381
17/02/2003 17:00:00	12.39841513	13.48085047
17/02/2003 18:00:00	11.64535173	12.80462619
17/02/2003 19:00:00	10.68709204	11.91387895
17/02/2003 20:00:00	9.586278375	10.87084678
17/02/2003 21:00:00	8.405553031	9.737767679
17/02/2003 22:00:00	7.207558316	8.576879651
17/02/2003 23:00:00	6.054936539	7.450420705
18/02/2003 00:00:00	5.010330005	6.420628848
18/02/2003 01:00:00	4.13638102	5.549742088
18/02/2003 02:00:00	3.495731891	4.899998431
18/02/2003 03:00:00	3.151024925	4.533635885
18/02/2003 04:00:00	3.164902426	4.512892456
18/02/2003 05:00:00	3.600006703	4.900006152
18/02/2003 06:00:00	4.489614217	5.728398202
18/02/2003 07:00:00	5.749541598	6.916226203
18/02/2003 08:00:00	7.266241401	8.352832712
18/02/2003 09:00:00	8.926166184	9.927560287
18/02/2003 10:00:00	10.6157685	11.52975148
18/02/2003 11:00:00	12.22150092	13.04874886
18/02/2003 12:00:00	13.62981598	14.37389498
18/02/2003 13:00:00	14.72716625	15.39453239
18/02/2003 14:00:00	15.40000428	16.00000366
18/02/2003 15:00:00	15.56579423	16.11013662
18/02/2003 16:00:00	15.26604285	15.76669658
18/02/2003 17:00:00	14.5732666	15.04193227
18/02/2003 18:00:00	13.55998195	14.00809242
18/02/2003 19:00:00	12.29870536	12.73742577
18/02/2003 20:00:00	10.8619533	11.30218104
18/02/2003 21:00:00	9.322242236	9.774606975
18/02/2003 22:00:00	7.752088629	8.226952302
18/02/2003 23:00:00	6.224008944	6.731465755
19/02/2003 00:00:00	4.810519646	5.360396068
19/02/2003 01:00:00	3.584137199	4.185991972
19/02/2003 02:00:00	2.61737807	3.280502201
19/02/2003 03:00:00	1.982758721	2.716175488
19/02/2003 04:00:00	1.752795618	2.565260565
19/02/2003 05:00:00	2.000005226	2.900006166
19/02/2003 06:00:00	2.765404009	3.759205408
19/02/2003 07:00:00	3.964012303	5.047833065
19/02/2003 08:00:00	5.479352382	6.637410351
19/02/2003 09:00:00	7.194946519	8.399458481
19/02/2003 10:00:00	8.994316988	10.20549867
19/02/2003 11:00:00	10.76098606	11.92705214
19/02/2003 12:00:00	12.37847601	13.43564009
19/02/2003 13:00:00	13.73030911	14.60278375
19/02/2003 14:00:00	14.70000763	15.30000433
19/02/2003 15:00:00	15.20093635	15.43399385
19/02/2003 16:00:00	15.26582634	15.05212319
19/02/2003 17:00:00	14.9572493	14.23693188
19/02/2003 18:00:00	14.33777697	13.07095942
19/02/2003 19:00:00	13.46998106	11.63674532
19/02/2003 20:00:00	12.41643328	10.01682911
19/02/2003 21:00:00	11.23970536	8.293750294
19/02/2003 22:00:00	10.00236902	6.550048385
19/02/2003 23:00:00	8.766995973	4.868262898
20/02/2003 00:00:00	7.596157939	3.330933347
20/02/2003 01:00:00	6.552426638	2.020599246
20/02/2003 02:00:00	5.698373788	1.019800108
20/02/2003 03:00:00	5.096571108	0.411075448
20/02/2003 04:00:00	4.809590316	0.276964778
20/02/2003 05:00:00	4.900003132	0.700007612
20/02/2003 06:00:00	5.404151792	1.726119248
20/02/2003 07:00:00	6.253463891	3.254722703
20/02/2003 08:00:00	7.353139186	5.148619071
20/02/2003 09:00:00	8.608377433	7.270609448
20/02/2003 10:00:00	9.924378388	9.483494928
20/02/2003 11:00:00	11.20634181	11.65007661
20/02/2003 12:00:00	12.35946745	13.63315558
20/02/2003 13:00:00	13.28895507	15.29553293
20/02/2003 14:00:00	13.90000442	16.50000977
20/02/2003 15:00:00	14.12241184	17.14425523
20/02/2003 16:00:00	13.98435688	17.26540617
20/02/2003 17:00:00	13.53861414	16.9354653
20/02/2003 18:00:00	12.83795818	16.22643535
20/02/2003 19:00:00	11.9351636	15.21031901
20/02/2003 20:00:00	10.88300497	13.95911901
20/02/2003 21:00:00	9.734256889	12.54483805
20/02/2003 22:00:00	8.541693929	11.03947883
20/02/2003 23:00:00	7.358090677	9.515044083
21/02/2003 00:00:00	6.236221716	8.043536507
21/02/2003 01:00:00	5.228861629	6.696958815
21/02/2003 02:00:00	4.388784999	5.547313717
21/02/2003 03:00:00	3.76876641	4.666603925
21/02/2003 04:00:00	3.421580446	4.12683215
21/02/2003 05:00:00	3.400001689	4.000001102
21/02/2003 06:00:00	3.734765799	4.329962768
21/02/2003 07:00:00	4.368455553	5.047969832
21/02/2003 08:00:00	5.221616213	6.057126048
21/02/2003 09:00:00	6.214793036	7.260535171
21/02/2003 10:00:00	7.268531284	8.561300956
21/02/2003 11:00:00	8.303376215	9.862527159
21/02/2003 12:00:00	9.239873089	11.06731753
21/02/2003 13:00:00	9.998567167	12.07877584
21/02/2003 14:00:00	10.50000371	12.80000582
21/02/2003 15:00:00	10.6849	13.15769666
21/02/2003 16:00:00	10.5746589	13.17287614
21/02/2003 17:00:00	10.21085397	12.89015596
21/02/2003 18:00:00	9.635058803	12.35414782
21/02/2003 19:00:00	8.88884697	11.60946341
21/02/2003 20:00:00	8.013792054	10.70071443
21/02/2003 21:00:00	7.051467634	9.672512567
21/02/2003 22:00:00	6.04344729	8.569469519
21/02/2003 23:00:00	5.031304602	7.43619698
22/02/2003 00:00:00	4.056613149	6.317306646
22/02/2003 01:00:00	3.160946511	5.257410211
22/02/2003 02:00:00	2.385878268	4.30111937
22/02/2003 03:00:00	1.772981999	3.493045817
22/02/2003 04:00:00	1.363831285	2.877801248
22/02/2003 05:00:00	1.199999704	2.499997357
22/02/2003 06:00:00	1.306565828	2.388407905
22/02/2003 07:00:00	1.642630332	2.508456982
22/02/2003 08:00:00	2.150799955	2.809731771
22/02/2003 09:00:00	2.773681434	3.241819455
22/02/2003 10:00:00	3.453881507	3.75430722
22/02/2003 11:00:00	4.134006914	4.296782248
22/02/2003 12:00:00	4.756664391	4.818831723
22/02/2003 13:00:00	5.264460677	5.27004283
22/02/2003 14:00:00	5.600002509	5.600002752
22/02/2003 15:00:00	5.721086669	5.770708373
22/02/2003 16:00:00	5.64626812	5.793793754
22/02/2003 17:00:00	5.409290875	5.693301846
22/02/2003 18:00:00	5.043898947	5.493275599
22/02/2003 19:00:00	4.58383635	5.217757963
22/02/2003 20:00:00	4.062847096	4.890791887
22/02/2003 21:00:00	3.514675198	4.536420323
22/02/2003 22:00:00	2.973064669	4.178686219
22/02/2003 23:00:00	2.471759523	3.841632527
23/02/2003 00:00:00	2.044503772	3.549302196
23/02/2003 01:00:00	1.72504143	3.325738176
23/02/2003 02:00:00	1.54711651	3.194983418
23/02/2003 03:00:00	1.544473024	3.181080871
23/02/2003 04:00:00	1.750854986	3.308073486
23/02/2003 05:00:00	2.200006409	3.600004213
23/02/2003 06:00:00	2.90847635	4.068547076
23/02/2003 07:00:00	3.824036319	4.675902031
23/02/2003 08:00:00	4.877264007	5.371900927
23/02/2003 09:00:00	5.998737102	6.106375613
23/02/2003 10:00:00	7.119033297	6.829157936
23/02/2003 11:00:00	8.16873028	7.490079745
23/02/2003 12:00:00	9.078405743	8.038972888
23/02/2003 13:00:00	9.778637376	8.425669214
23/02/2003 14:00:00	10.20000287	8.60000057
23/02/2003 15:00:00	10.29273997	8.526786878
23/02/2003 16:00:00	10.08572403	8.230798356
23/02/2003 17:00:00	9.627489143	7.751792297
23/02/2003 18:00:00	8.966569418	7.129525995
23/02/2003 19:00:00	8.151498952	6.403756743
23/02/2003 20:00:00	7.230811845	5.614241835
23/02/2003 21:00:00	6.253042197	4.800738564
23/02/2003 22:00:00	5.266724108	4.003004225
23/02/2003 23:00:00	4.320391678	3.260796109
24/02/2003 00:00:00	3.462579007	2.613871512
24/02/2003 01:00:00	2.741820195	2.101987726
24/02/2003 02:00:00	2.206649343	1.764902046
24/02/2003 03:00:00	1.90560055	1.642371763
24/02/2003 04:00:00	1.887207917	1.774154174
24/02/2003 05:00:00	2.200005543	2.200006569
24/02/2003 06:00:00	2.871502396	2.941268996
24/02/2003 07:00:00	3.84510974	3.945614983
24/02/2003 08:00:00	5.04321512	5.142302049
24/02/2003 09:00:00	6.388206081	6.460587713
24/02/2003 10:00:00	7.802470167	7.829729495
24/02/2003 11:00:00	9.208394925	9.178984914
24/02/2003 12:00:00	10.5283679	10.43761149
24/02/2003 13:00:00	11.68477663	11.53486674
24/02/2003 14:00:00	12.60000867	12.40000818
24/02/2003 15:00:00	13.21511561	12.97956245
24/02/2003 16:00:00	13.54580273	13.28913029
24/02/2003 17:00:00	13.62643808	13.36158038
24/02/2003 18:00:00	13.49138972	13.22978141
24/02/2003 19:00:00	13.17502572	12.92660206
24/02/2003 20:00:00	12.71171413	12.48491103
24/02/2003 21:00:00	12.13582301	11.93757698
24/02/2003 22:00:00	11.48172043	11.31746862
24/02/2003 23:00:00	10.78377444	10.65745461
25/02/2003 00:00:00	10.07635311	9.990403663
25/02/2003 01:00:00	9.393824484	9.349184447
25/02/2003 02:00:00	8.770556635	8.766665651
25/02/2003 03:00:00	8.24091762	8.27571596
25/02/2003 04:00:00	7.839275497	7.90920406
25/02/2003 05:00:00	7.599998328	7.699998637
25/02/2003 06:00:00	7.545075666	7.669281773
25/02/2003 07:00:00	7.646984735	7.791490746
25/02/2003 08:00:00	7.865825099	8.029377033
25/02/2003 09:00:00	8.161696323	8.345692108
25/02/2003 10:00:00	8.49469797	8.703187448
25/02/2003 11:00:00	8.824929607	9.064614527
25/02/2003 12:00:00	9.112490796	9.392724821
25/02/2003 13:00:00	9.317481103	9.650269806
25/02/2003 14:00:00	9.400000092	9.800000957
25/02/2003 15:00:00	9.331078366	9.814424342
25/02/2003 16:00:00	9.125469187	9.705063057
25/02/2003 17:00:00	8.8088561	9.493194116
25/02/2003 18:00:00	8.406922652	9.200094537
25/02/2003 19:00:00	7.945352391	8.847041333
25/02/2003 20:00:00	7.449828863	8.455311522
25/02/2003 21:00:00	6.946035616	8.04618212
25/02/2003 22:00:00	6.459656195	7.640930141
25/02/2003 23:00:00	6.016374149	7.260832602
26/02/2003 00:00:00	5.641873023	6.927166519
26/02/2003 01:00:00	5.361836366	6.661208907
26/02/2003 02:00:00	5.201947723	6.484236782
26/02/2003 03:00:00	5.187890642	6.417527161
26/02/2003 04:00:00	5.34534867	6.482357059
26/02/2003 05:00:00	5.700005353	6.700003491
26/02/2003 06:00:00	6.263547045	7.080705722
26/02/2003 07:00:00	6.99167327	7.590553542
26/02/2003 08:00:00	7.82608733	8.184599759
26/02/2003 09:00:00	8.70849253	8.817897179
26/02/2003 10:00:00	9.580592173	9.445498608
26/02/2003 11:00:00	10.38408956	10.02245685
26/02/2003 12:00:00	11.060688	10.50382472
26/02/2003 13:00:00	11.55209079	10.84465502
26/02/2003 14:00:00	11.80000124	11.00000056
26/02/2003 15:00:00	11.76275792	10.93777147
26/02/2003 16:00:00	11.46523811	10.67730543
26/02/2003 17:00:00	10.9489532	10.25079654
26/02/2003 18:00:00	10.25541459	9.690438915
26/02/2003 19:00:00	9.426133664	9.028426655
26/02/2003 20:00:00	8.502621814	8.296953869
26/02/2003 21:00:00	7.52639043	7.52821466
26/02/2003 22:00:00	6.538950901	6.754403135
26/02/2003 23:00:00	5.581814619	6.007713401
27/02/2003 00:00:00	4.696492973	5.320339562
27/02/2003 01:00:00	3.924497354	4.724475724
27/02/2003 02:00:00	3.307339151	4.252315995
27/02/2003 03:00:00	2.886529756	3.936054478
27/02/2003 04:00:00	2.703580557	3.807885282
27/02/2003 05:00:00	2.800002945	3.90000251
27/02/2003 06:00:00	3.198667257	4.22984813
27/02/2003 07:00:00	3.847882244	4.755857636
27/02/2003 08:00:00	4.677316922	5.421715426
27/02/2003 09:00:00	5.616640309	6.171105899
27/02/2003 10:00:00	6.595521421	6.947713452
27/02/2003 11:00:00	7.543629272	7.695222482
27/02/2003 12:00:00	8.390632881	8.35731739
27/02/2003 13:00:00	9.066201262	8.877682571
27/02/2003 14:00:00	9.500003432	9.200002425
27/02/2003 15:00:00	9.639969748	9.282606353
27/02/2003 16:00:00	9.507073331	9.14240169
27/02/2003 17:00:00	9.140547344	8.810939732
27/02/2003 18:00:00	8.57962495	8.319771777
27/02/2003 19:00:00	7.863539311	7.70044912
27/02/2003 20:00:00	7.031523589	6.984523059
27/02/2003 21:00:00	6.122810949	6.203544891
27/02/2003 22:00:00	5.176634552	5.389065911
27/02/2003 23:00:00	4.232227561	4.572637417
28/02/2003 00:00:00	3.328823139	3.785810705
28/02/2003 01:00:00	2.505654449	3.060137072
28/02/2003 02:00:00	1.801954654	2.427167815
28/02/2003 03:00:00	1.256956915	1.91845423
28/02/2003 04:00:00	0.909894397	1.565547615
28/02/2003 05:00:00	0.800000261	1.399999265
28/02/2003 06:00:00	0.949968046	1.44067537
28/02/2003 07:00:00	1.316335169	1.655703505
28/02/2003 08:00:00	1.839100613	2.000527052
28/02/2003 09:00:00	2.458263358	2.43058939
28/02/2003 10:00:00	3.113822386	2.9013339
28/02/2003 11:00:00	3.745776678	3.368203961
28/02/2003 12:00:00	4.294125216	3.786642954
28/02/2003 13:00:00	4.698866982	4.112094259
28/02/2003 14:00:00	4.900000956	4.300001256
28/02/2003 15:00:00	4.854450136	4.318277442
28/02/2003 16:00:00	4.586831137	4.184714973
28/02/2003 17:00:00	4.138683364	3.92957522
28/02/2003 18:00:00	3.551546224	3.583119557
28/02/2003 19:00:00	2.866959124	3.175609355
28/02/2003 20:00:00	2.126461469	2.737305985
28/02/2003 21:00:00	1.371592667	2.298470819
28/02/2003 22:00:00	0.643892124	1.889365229
28/02/2003 23:00:00	-0.015100753	1.540250587
01/03/2003 00:00:00	-0.563846559	1.281388264
01/03/2003 01:00:00	-0.960805887	1.143039633
01/03/2003 02:00:00	-1.16443933	1.155466065
01/03/2003 03:00:00	-1.133207481	1.348928932
01/03/2003 04:00:00	-0.825570935	1.753689605
01/03/2003 05:00:00	-0.199990285	2.400009457
01/03/2003 06:00:00	0.764645623	3.302127157
01/03/2003 07:00:00	2.007737913	4.410192907
01/03/2003 08:00:00	3.44826095	5.658335376
01/03/2003 09:00:00	5.005189098	6.980683235
01/03/2003 10:00:00	6.597496718	8.311365153
01/03/2003 11:00:00	8.144158176	9.584509799
01/03/2003 12:00:00	9.564147834	10.73424584
01/03/2003 13:00:00	10.77644006	11.69470195
01/03/2003 14:00:00	11.70000921	12.4000068
01/03/2003 15:00:00	12.27474612	12.80178035
01/03/2003 16:00:00	12.52420441	12.92160514
01/03/2003 17:00:00	12.49285265	12.79855372
01/03/2003 18:00:00	12.2251594	12.47169865
01/03/2003 19:00:00	11.7655932	11.98011248
01/03/2003 20:00:00	11.15862263	11.36286776
01/03/2003 21:00:00	10.44871623	10.65903705
01/03/2003 22:00:00	9.680342577	9.907692885
01/03/2003 23:00:00	8.897970218	9.147907833
02/03/2003 00:00:00	8.146067714	8.418754439
02/03/2003 01:00:00	7.469103625	7.759305257
02/03/2003 02:00:00	6.911546508	7.208632838
02/03/2003 03:00:00	6.517864922	6.805809735
02/03/2003 04:00:00	6.332527426	6.589908499
02/03/2003 05:00:00	6.40000258	6.600001682
02/03/2003 06:00:00	6.745799249	6.857729765
02/03/2003 07:00:00	7.319590349	7.315007522
02/03/2003 08:00:00	8.052090509	7.906318949
02/03/2003 09:00:00	8.874014358	8.566148043
02/03/2003 10:00:00	9.716076526	9.228978798
02/03/2003 11:00:00	10.50899164	9.829295212
02/03/2003 12:00:00	11.18347434	10.30158128
02/03/2003 13:00:00	11.67023924	10.580321
02/03/2003 14:00:00	11.90000097	10.59999836
02/03/2003 15:00:00	11.82276611	10.31434047
02/03/2003 16:00:00	11.46570606	9.754043971
02/03/2003 17:00:00	10.87528275	8.96904717
02/03/2003 18:00:00	10.09795809	8.009288382
02/03/2003 19:00:00	9.180193985	6.924705919
02/03/2003 20:00:00	8.168452361	5.765238092
02/03/2003 21:00:00	7.10919513	4.580823214
02/03/2003 22:00:00	6.048884206	3.421399595
02/03/2003 23:00:00	5.033981503	2.336905549
03/03/2003 00:00:00	4.110948936	1.377279388
03/03/2003 01:00:00	3.32624842	0.592459421
03/03/2003 02:00:00	2.72634187	0.032383963
03/03/2003 03:00:00	2.357691199	-0.253008676
03/03/2003 04:00:00	2.266758323	-0.213780183
03/03/2003 05:00:00	2.500005157	0.200007754
03/03/2003 06:00:00	3.081871579	1.014123791
03/03/2003 07:00:00	3.948712649	2.15766161
03/03/2003 08:00:00	5.014863047	3.53554706
03/03/2003 09:00:00	6.194657455	5.052705986
03/03/2003 10:00:00	7.402430555	6.614064235
03/03/2003 11:00:00	8.552517027	8.124547656
03/03/2003 12:00:00	9.559251554	9.489082096
03/03/2003 13:00:00	10.33696882	10.6125934
03/03/2003 14:00:00	10.8000035	11.40000742
03/03/2003 15:00:00	10.88525961	11.78027185
03/03/2003 16:00:00	10.61991507	11.77841814
03/03/2003 17:00:00	10.05371542	11.44349778
03/03/2003 18:00:00	9.236406211	10.82456226
03/03/2003 19:00:00	8.217732972	9.970663055
03/03/2003 20:00:00	7.047441249	8.930851658
03/03/2003 21:00:00	5.775276584	7.754179552
03/03/2003 22:00:00	4.450984518	6.489698221
03/03/2003 23:00:00	3.124310593	5.186459152
04/03/2003 00:00:00	1.84500035	3.893513829
04/03/2003 01:00:00	0.662799331	2.659913738
04/03/2003 02:00:00	-0.372546923	1.534710363
04/03/2003 03:00:00	-1.21129287	0.566955191
04/03/2003 04:00:00	-1.803692969	-0.194300295
04/03/2003 05:00:00	-2.100001678	-0.700004608
04/03/2003 06:00:00	-2.069493776	-0.918036813
04/03/2003 07:00:00	-1.757522411	-0.883995583
04/03/2003 08:00:00	-1.228459601	-0.650408847
04/03/2003 09:00:00	-0.546677358	-0.269804532
04/03/2003 10:00:00	0.2234523	0.205289433
04/03/2003 11:00:00	1.017557359	0.722345121
04/03/2003 12:00:00	1.771265804	1.228834603
04/03/2003 13:00:00	2.42020562	1.67222995
04/03/2003 14:00:00	2.90000479	2.000003235
04/03/2003 15:00:00	3.161513434	2.171738679
04/03/2003 16:00:00	3.216467856	2.195467236
04/03/2003 17:00:00	3.091825328	2.091331078
04/03/2003 18:00:00	2.814543118	1.879472376
04/03/2003 19:00:00	2.411578494	1.580033303
04/03/2003 20:00:00	1.909888727	1.21315603
04/03/2003 21:00:00	1.336431085	0.798982729
04/03/2003 22:00:00	0.718162837	0.357655572
04/03/2003 23:00:00	0.082041253	-0.090683268
05/03/2003 00:00:00	-0.544976398	-0.525891621
05/03/2003 01:00:00	-1.135932847	-0.927827314
05/03/2003 02:00:00	-1.663870826	-1.276348175
05/03/2003 03:00:00	-2.101833064	-1.551312032
05/03/2003 04:00:00	-2.422862294	-1.732576714
05/03/2003 05:00:00	-2.600001245	-1.800000049
05/03/2003 06:00:00	-2.617169239	-1.741999158
05/03/2003 07:00:00	-2.501790277	-1.581227008
05/03/2003 08:00:00	-2.292164104	-1.348895196
05/03/2003 09:00:00	-2.026590466	-1.076215318
05/03/2003 10:00:00	-1.74336911	-0.79439897
05/03/2003 11:00:00	-1.480799782	-0.534657749
05/03/2003 12:00:00	-1.277182228	-0.32820325
05/03/2003 13:00:00	-1.170816194	-0.206247071
05/03/2003 14:00:00	-1.200001427	-0.200000807
05/03/2003 15:00:00	-1.391526804	-0.330982251
05/03/2003 16:00:00	-1.726139521	-0.581935502
05/03/2003 17:00:00	-2.173076802	-0.925911608
05/03/2003 18:00:00	-2.701575874	-1.335961619
05/03/2003 19:00:00	-3.280873961	-1.785136588
05/03/2003 20:00:00	-3.88020829	-2.246487563
05/03/2003 21:00:00	-4.468816084	-2.693065595
05/03/2003 22:00:00	-5.015934569	-3.097921734
05/03/2003 23:00:00	-5.490800971	-3.434107031
06/03/2003 00:00:00	-5.862652515	-3.674672537
06/03/2003 01:00:00	-6.100726425	-3.7926693
06/03/2003 02:00:00	-6.174259928	-3.761148373
06/03/2003 03:00:00	-6.052490248	-3.553160804
06/03/2003 04:00:00	-5.704654611	-3.141757644
06/03/2003 05:00:00	-5.099990242	-2.499989945
06/03/2003 06:00:00	-4.224847631	-1.617355007
06/03/2003 07:00:00	-3.134027641	-0.549132551
06/03/2003 08:00:00	-1.899443049	0.632952746
06/03/2003 09:00:00	-0.593006635	1.857176209
06/03/2003 10:00:00	0.713368825	3.051813162
06/03/2003 11:00:00	1.94777055	4.145138927
06/03/2003 12:00:00	3.038285762	5.065428828
06/03/2003 13:00:00	3.913001683	5.74095819
06/03/2003 14:00:00	4.500005533	6.100002335
06/03/2003 15:00:00	4.74810266	6.092693797
06/03/2003 16:00:00	4.688967626	5.756590484
06/03/2003 17:00:00	4.374991479	5.151105783
06/03/2003 18:00:00	3.858565267	4.33565308
06/03/2003 19:00:00	3.192080038	3.369645761
06/03/2003 20:00:00	2.427926838	2.312497215
06/03/2003 21:00:00	1.618496716	1.223620827
06/03/2003 22:00:00	0.816180719	0.162429984
06/03/2003 23:00:00	0.073369895	-0.811661927
07/03/2003 00:00:00	-0.557544709	-1.63924152
07/03/2003 01:00:00	-1.024172046	-2.260895408
07/03/2003 02:00:00	-1.274121067	-2.617210204
07/03/2003 03:00:00	-1.255000725	-2.648772522
07/03/2003 04:00:00	-0.914419972	-2.296168975
07/03/2003 05:00:00	-0.199987761	-1.499986177
07/03/2003 06:00:00	0.914626039	-0.23103119
07/03/2003 07:00:00	2.351512058	1.41901195
07/03/2003 08:00:00	4.006702095	3.328241175
07/03/2003 09:00:00	5.776227945	5.374754415
07/03/2003 10:00:00	7.556121406	7.4366496
07/03/2003 11:00:00	9.242414274	9.392024661
07/03/2003 12:00:00	10.73113835	11.11897753
07/03/2003 13:00:00	11.91832542	12.49560613
07/03/2003 14:00:00	12.70000729	13.40000841
07/03/2003 15:00:00	13.00120463	13.74397081
07/03/2003 16:00:00	12.86288894	13.57402852
07/03/2003 17:00:00	12.35501826	12.97040256
07/03/2003 18:00:00	11.54755065	12.01331391
07/03/2003 19:00:00	10.51044415	10.7829836
07/03/2003 20:00:00	9.313656807	9.359632623
07/03/2003 21:00:00	8.027146666	7.823481989
07/03/2003 22:00:00	6.720871775	6.254752704
07/03/2003 23:00:00	5.46479018	4.733665774
08/03/2003 00:00:00	4.328859928	3.340442206
08/03/2003 01:00:00	3.383039065	2.155303006
08/03/2003 02:00:00	2.697285638	1.258469179
08/03/2003 03:00:00	2.341557694	0.730161733
08/03/2003 04:00:00	2.385813278	0.650601674
08/03/2003 05:00:00	2.900010438	1.100010007
08/03/2003 06:00:00	3.921570758	2.122276225
08/03/2003 07:00:00	5.357775253	3.615969651
08/03/2003 08:00:00	7.083371113	5.443331037
08/03/2003 09:00:00	8.973105528	7.466601138
08/03/2003 10:00:00	10.90172569	9.548020708
08/03/2003 11:00:00	12.74397878	11.5498305
08/03/2003 12:00:00	14.37461201	13.33427127
08/03/2003 13:00:00	15.66837255	14.76358377
08/03/2003 14:00:00	16.50000759	15.70000875
08/03/2003 15:00:00	16.77808857	16.04261101
08/03/2003 16:00:00	16.54647831	15.83774551
08/03/2003 17:00:00	15.88286114	15.16858824
08/03/2003 18:00:00	14.86492137	14.11831522
08/03/2003 19:00:00	13.57034332	12.77010243
08/03/2003 20:00:00	12.0768113	11.20712587
08/03/2003 21:00:00	10.46200962	9.512561553
08/03/2003 22:00:00	8.803622617	7.769585469
08/03/2003 23:00:00	7.179334589	6.06137362
09/03/2003 00:00:00	5.666829857	4.471102004
09/03/2003 01:00:00	4.343792736	3.081946623
09/03/2003 02:00:00	3.287907542	1.977083474
09/03/2003 03:00:00	2.576858592	1.239688559
09/03/2003 04:00:00	2.2883302	0.952937875
09/03/2003 05:00:00	2.500006683	1.200007424
09/03/2003 06:00:00	3.255919251	2.027488086
09/03/2003 07:00:00	4.465492225	3.335636292
09/03/2003 08:00:00	6.004499591	4.988126363
09/03/2003 09:00:00	7.74871533	6.848632619
09/03/2003 10:00:00	9.573913426	8.780829381
09/03/2003 11:00:00	11.35586786	10.64839097
09/03/2003 12:00:00	12.97035263	12.3149917
09/03/2003 13:00:00	14.2931417	13.64430591
09/03/2003 14:00:00	15.20000906	14.5000079
09/03/2003 15:00:00	15.59913921	14.78227694
09/03/2003 16:00:00	15.52835339	14.53730597
09/03/2003 17:00:00	15.05788064	13.84778987
09/03/2003 18:00:00	14.25795003	12.79642352
09/03/2003 19:00:00	13.19879062	11.46590178
09/03/2003 20:00:00	11.95063148	9.938919533
09/03/2003 21:00:00	10.58370166	8.298171643
09/03/2003 22:00:00	9.168230232	6.626352983
09/03/2003 23:00:00	7.774446255	5.006158427
10/03/2003 00:00:00	6.472578791	3.520282848
10/03/2003 01:00:00	5.332856902	2.251421116
10/03/2003 02:00:00	4.42550965	1.282268104
10/03/2003 03:00:00	3.820766097	0.695518684
10/03/2003 04:00:00	3.588855306	0.573867729
10/03/2003 05:00:00	3.800006338	1.000010111
10/03/2003 06:00:00	4.494507593	2.020657706
10/03/2003 07:00:00	5.592889816	3.53859641
10/03/2003 08:00:00	6.985745584	5.420632125
10/03/2003 09:00:00	8.563667475	7.53357075
10/03/2003 10:00:00	10.21724807	9.744218188
10/03/2003 11:00:00	11.83707994	11.91938034
10/03/2003 12:00:00	13.31375567	13.9258631
10/03/2003 13:00:00	14.53786783	15.63047238
10/03/2003 14:00:00	15.40000901	16.90001407
10/03/2003 15:00:00	15.81844735	17.63449152
10/03/2003 16:00:00	15.82214873	17.86669222
10/03/2003 17:00:00	15.46775224	17.66259832
10/03/2003 18:00:00	14.81189701	17.088192
10/03/2003 19:00:00	13.91122215	16.2094554
10/03/2003 20:00:00	12.82236678	15.09237068
10/03/2003 21:00:00	11.60197001	13.80292
10/03/2003 22:00:00	10.30667095	12.40708552
10/03/2003 23:00:00	8.993108722	10.97084938
11/03/2003 00:00:00	7.71792244	9.560193749
11/03/2003 01:00:00	6.537751218	8.241100783
11/03/2003 02:00:00	5.509234172	7.079552637
11/03/2003 03:00:00	4.689010417	6.141531468
11/03/2003 04:00:00	4.133719067	5.493019432
11/03/2003 05:00:00	3.899999238	5.199998686
11/03/2003 06:00:00	4.023209841	5.304517746
11/03/2003 07:00:00	4.453592562	5.752894616
11/03/2003 08:00:00	5.120110686	6.467515684
11/03/2003 09:00:00	5.951727494	7.370767335
11/03/2003 10:00:00	6.87740627	8.385035956
11/03/2003 11:00:00	7.826110295	9.432707935
11/03/2003 12:00:00	8.726802853	10.43616966
11/03/2003 13:00:00	9.508447226	11.31780751
11/03/2003 14:00:00	10.1000067	12.00000788
11/03/2003 15:00:00	10.44740574	12.42325469
11/03/2003 16:00:00	10.56441072	12.60041888
11/03/2003 17:00:00	10.48174776	12.56246742
11/03/2003 18:00:00	10.23014298	12.34036725
11/03/2003 19:00:00	9.840322499	11.96508532
11/03/2003 20:00:00	9.343012432	11.46758859
11/03/2003 21:00:00	8.7689389	10.87884399
11/03/2003 22:00:00	8.148828021	10.22981849
11/03/2003 23:00:00	7.513405916	9.551479033
12/03/2003 00:00:00	6.893398702	8.874792565
12/03/2003 01:00:00	6.3195325	8.230726038
12/03/2003 02:00:00	5.822533428	7.650246404
12/03/2003 03:00:00	5.433127605	7.164320612
12/03/2003 04:00:00	5.18204115	6.803915611
12/03/2003 05:00:00	5.100000182	6.599998353
12/03/2003 06:00:00	5.205606234	6.572264799
12/03/2003 07:00:00	5.468964575	6.695328894
12/03/2003 08:00:00	5.848056924	6.932534561
12/03/2003 09:00:00	6.300865003	7.247225723
12/03/2003 10:00:00	6.785370531	7.602746302
12/03/2003 11:00:00	7.259555231	7.962440222
12/03/2003 12:00:00	7.681400823	8.289651404
12/03/2003 13:00:00	8.008889026	8.547723773
12/03/2003 14:00:00	8.200001563	8.700001251
12/03/2003 15:00:00	8.22394159	8.7192318
12/03/2003 16:00:00	8.094796074	8.615777922
12/03/2003 17:00:00	7.837872452	8.409405349
12/03/2003 18:00:00	7.478478164	8.119879811
12/03/2003 19:00:00	7.041920645	7.766967042
12/03/2003 20:00:00	6.553507334	7.370432772
12/03/2003 21:00:00	6.038545668	6.950042732
12/03/2003 22:00:00	5.522343084	6.525562656
12/03/2003 23:00:00	5.03020702	6.116758273
13/03/2003 00:00:00	4.587444913	5.743395316
13/03/2003 01:00:00	4.219364202	5.425239515
13/03/2003 02:00:00	3.951272322	5.182056604
13/03/2003 03:00:00	3.808476713	5.033612313
13/03/2003 04:00:00	3.816284811	4.999672374
13/03/2003 05:00:00	4.000004054	5.100002519
13/03/2003 06:00:00	4.373082433	5.344894214
13/03/2003 07:00:00	4.901532215	5.706743512
13/03/2003 08:00:00	5.539507251	6.148473026
13/03/2003 09:00:00	6.24116139	6.633005366
13/03/2003 10:00:00	6.960648483	7.123263143
13/03/2003 11:00:00	7.652122382	7.58216897
13/03/2003 12:00:00	8.269736935	7.972645456
13/03/2003 13:00:00	8.767645993	8.257615214
13/03/2003 14:00:00	9.100003408	8.400000854
13/03/2003 15:00:00	9.233039436	8.373121541
13/03/2003 16:00:00	9.181287857	8.191880834
13/03/2003 17:00:00	8.971357805	7.881577939
13/03/2003 18:00:00	8.629858414	7.467512059
13/03/2003 19:00:00	8.183398816	6.974982401
13/03/2003 20:00:00	7.658588145	6.429288168
13/03/2003 21:00:00	7.082035534	5.855728567
13/03/2003 22:00:00	6.480350117	5.279602802
13/03/2003 23:00:00	5.880141028	4.726210078
14/03/2003 00:00:00	5.308017399	4.220849601
14/03/2003 01:00:00	4.790588364	3.788820574
14/03/2003 02:00:00	4.354463057	3.455422204
14/03/2003 03:00:00	4.026250611	3.245953694
14/03/2003 04:00:00	3.832560158	3.185714251
14/03/2003 05:00:00	3.800000834	3.300003079
14/03/2003 06:00:00	3.944415408	3.602655643
14/03/2003 07:00:00	4.238583094	4.061654463
14/03/2003 08:00:00	4.644517689	4.633519329
14/03/2003 09:00:00	5.124232993	5.274770028
14/03/2003 10:00:00	5.639742803	5.94192635
14/03/2003 11:00:00	6.153060917	6.591508085
14/03/2003 12:00:00	6.626201134	7.18003502
14/03/2003 13:00:00	7.021177251	7.664026944
14/03/2003 14:00:00	7.300003066	8.000003647
14/03/2003 15:00:00	7.434022026	8.155474619
14/03/2003 16:00:00	7.431894517	8.141906217
14/03/2003 17:00:00	7.31160975	7.981753528
14/03/2003 18:00:00	7.091156934	7.697471639
14/03/2003 19:00:00	6.788525279	7.311515636
14/03/2003 20:00:00	6.421703996	6.846340608
14/03/2003 21:00:00	6.008682294	6.32440164
14/03/2003 22:00:00	5.567449383	5.76815382
14/03/2003 23:00:00	5.115994474	5.200052236
15/03/2003 00:00:00	4.672306776	4.642551973
15/03/2003 01:00:00	4.2543755	4.118108119
15/03/2003 02:00:00	3.880189855	3.649175761
15/03/2003 03:00:00	3.567739052	3.258209986
15/03/2003 04:00:00	3.3350123	2.967665881
15/03/2003 05:00:00	3.199998809	2.799998533
15/03/2003 06:00:00	3.174034313	2.769671583
15/03/2003 07:00:00	3.241841821	2.859184314
15/03/2003 08:00:00	3.381491459	3.043045276
15/03/2003 09:00:00	3.571053354	3.295763017
15/03/2003 10:00:00	3.788597632	3.591846087
15/03/2003 11:00:00	4.012194418	3.905803035
15/03/2003 12:00:00	4.219913839	4.21214241
15/03/2003 13:00:00	4.389826021	4.485372762
15/03/2003 14:00:00	4.50000109	4.70000264
15/03/2003 15:00:00	4.53396959	4.836480632
15/03/2003 16:00:00	4.49710276	4.899014418
15/03/2003 17:00:00	4.400231772	4.897751185
15/03/2003 18:00:00	4.254187792	4.842838119
15/03/2003 19:00:00	4.069801991	4.744422407
15/03/2003 20:00:00	3.857905537	4.612651237
15/03/2003 21:00:00	3.6293296	4.457671794
15/03/2003 22:00:00	3.394905349	4.289631265
15/03/2003 23:00:00	3.165463953	4.118676838
16/03/2003 00:00:00	2.951836581	3.954955699
16/03/2003 01:00:00	2.764854402	3.808615034
16/03/2003 02:00:00	2.615348585	3.689802031
16/03/2003 03:00:00	2.5141503	3.608663876
16/03/2003 04:00:00	2.472090716	3.575347756
16/03/2003 05:00:00	2.500001001	3.600000858
16/03/2003 06:00:00	2.604066076	3.6880997
16/03/2003 07:00:00	2.77188671	3.826438973
16/03/2003 08:00:00	2.986417839	3.997143119
16/03/2003 09:00:00	3.230614401	4.182336583
16/03/2003 10:00:00	3.487431337	4.364143807
16/03/2003 11:00:00	3.739823582	4.524689236
16/03/2003 12:00:00	3.970746076	4.646097313
16/03/2003 13:00:00	4.163153757	4.710492482
16/03/2003 14:00:00	4.300001563	4.699999185
16/03/2003 15:00:00	4.368809103	4.602104879
16/03/2003 16:00:00	4.37535384	4.425748089
16/03/2003 17:00:00	4.329977493	4.185229869
16/03/2003 18:00:00	4.243021782	3.894851269
16/03/2003 19:00:00	4.124828426	3.568913342
16/03/2003 20:00:00	3.985739146	3.221717139
16/03/2003 21:00:00	3.836095659	2.867563714
16/03/2003 22:00:00	3.686239687	2.520754116
16/03/2003 23:00:00	3.546512948	2.195589399
17/03/2003 00:00:00	3.427257162	1.906370615
17/03/2003 01:00:00	3.338814049	1.667398814
17/03/2003 02:00:00	3.291525327	1.49297505
17/03/2003 03:00:00	3.295732717	1.397400373
17/03/2003 04:00:00	3.361777938	1.394975837
17/03/2003 05:00:00	3.500002709	1.500002492
17/03/2003 06:00:00	3.715126451	1.719592871
17/03/2003 07:00:00	3.989380416	2.03210674
17/03/2003 08:00:00	4.29937407	2.408716001
17/03/2003 09:00:00	4.621716879	2.820592559
17/03/2003 10:00:00	4.93301831	3.238908316
17/03/2003 11:00:00	5.20988783	3.634835176
17/03/2003 12:00:00	5.428934906	3.979545042
17/03/2003 13:00:00	5.566769003	4.244209817
17/03/2003 14:00:00	5.599999589	4.400001405
17/03/2003 15:00:00	5.512809649	4.426575337
17/03/2003 16:00:00	5.319674859	4.337520105
17/03/2003 17:00:00	5.042643718	4.154907048
17/03/2003 18:00:00	4.703764725	3.900807507
17/03/2003 19:00:00	4.325086378	3.597292822
17/03/2003 20:00:00	3.928657176	3.266434332
17/03/2003 21:00:00	3.536525619	2.930303378
17/03/2003 22:00:00	3.170740205	2.610971301
17/03/2003 23:00:00	2.853349434	2.330509439
18/03/2003 00:00:00	2.606401804	2.110989134
18/03/2003 01:00:00	2.451945814	1.974481725
18/03/2003 02:00:00	2.412029963	1.943058554
18/03/2003 03:00:00	2.508702751	2.038790958
18/03/2003 04:00:00	2.764012675	2.28375028
18/03/2003 05:00:00	3.200008236	2.700007859
18/03/2003 06:00:00	3.825715691	3.297156446
18/03/2003 07:00:00	4.598074746	4.034876747
18/03/2003 08:00:00	5.461004074	4.860372035
18/03/2003 09:00:00	6.358422345	5.720845581
18/03/2003 10:00:00	7.23424823	6.563500659
18/03/2003 11:00:00	8.032400402	7.33554054
18/03/2003 12:00:00	8.696797532	7.984168496
18/03/2003 13:00:00	9.17135829	8.456587801
18/03/2003 14:00:00	9.400001349	8.700001726
18/03/2003 15:00:00	9.343658204	8.677416072
18/03/2003 16:00:00	9.031308487	8.415043816
18/03/2003 17:00:00	8.508943071	7.954898993
18/03/2003 18:00:00	7.822552828	7.338995636
18/03/2003 19:00:00	7.018128633	6.609347782
18/03/2003 20:00:00	6.141661359	5.807969465
18/03/2003 21:00:00	5.239141879	4.97687472
18/03/2003 22:00:00	4.356561067	4.158077582
18/03/2003 23:00:00	3.539909795	3.393592086
19/03/2003 00:00:00	2.835178937	2.725432267
19/03/2003 01:00:00	2.288359366	2.19561216
19/03/2003 02:00:00	1.945441956	1.846145799
19/03/2003 03:00:00	1.852417579	1.719047219
19/03/2003 04:00:00	2.05527711	1.856330456
19/03/2003 05:00:00	2.600011421	2.300009544
19/03/2003 06:00:00	3.508775723	3.07095464
19/03/2003 07:00:00	4.708387038	4.105464347
19/03/2003 08:00:00	6.101828962	5.318695375
19/03/2003 09:00:00	7.59208509	6.625804428
19/03/2003 10:00:00	9.082139016	7.941948217
19/03/2003 11:00:00	10.47497433	9.182283448
19/03/2003 12:00:00	11.67357464	10.26196683
19/03/2003 13:00:00	12.58092353	11.09615507
19/03/2003 14:00:00	13.10000459	11.60000487
19/03/2003 15:00:00	13.16170698	11.7128744
19/03/2003 16:00:00	12.80853677	11.47092307
19/03/2003 17:00:00	12.11090296	10.93450946
19/03/2003 18:00:00	11.13921457	10.16399216
19/03/2003 19:00:00	9.9638806	9.219729755
19/03/2003 20:00:00	8.655310048	8.162080831
19/03/2003 21:00:00	7.283911922	7.051403974
19/03/2003 22:00:00	5.920095227	5.948057769
19/03/2003 23:00:00	4.634268966	4.912400802
20/03/2003 00:00:00	3.496842144	4.004791659
20/03/2003 01:00:00	2.578223766	3.285588926
20/03/2003 02:00:00	1.948822836	2.815151189
20/03/2003 03:00:00	1.679048358	2.653837033
20/03/2003 04:00:00	1.839309338	2.862005044
20/03/2003 05:00:00	2.500014778	3.500013808
20/03/2003 06:00:00	3.697986757	4.599216459
20/03/2003 07:00:00	5.335706009	6.07494983
20/03/2003 08:00:00	7.282069532	7.813548055
20/03/2003 09:00:00	9.405974321	9.701345268
20/03/2003 10:00:00	11.57631737	11.6246756
20/03/2003 11:00:00	13.66199568	13.46987319
20/03/2003 12:00:00	15.53190624	15.12327217
20/03/2003 13:00:00	17.05494606	16.47120667
20/03/2003 14:00:00	18.10001211	17.40001083
20/03/2003 15:00:00	18.57053062	17.82602199
20/03/2003 16:00:00	18.50803803	17.78558468
20/03/2003 17:00:00	17.98859671	17.34504374
20/03/2003 18:00:00	17.08826904	16.57074407
20/03/2003 19:00:00	15.88311738	15.52903051
20/03/2003 20:00:00	14.4492041	14.28624794
20/03/2003 21:00:00	12.86259158	12.90874123
20/03/2003 22:00:00	11.19934218	11.46285524
20/03/2003 23:00:00	9.535518269	10.01493484
21/03/2003 00:00:00	7.947182227	8.631324901
21/03/2003 01:00:00	6.510396419	7.378370288
21/03/2003 02:00:00	5.301223216	6.322415869
21/03/2003 03:00:00	4.395724987	5.529806512
21/03/2003 04:00:00	3.869964103	5.066887084
21/03/2003 05:00:00	3.800002934	5.000002453
21/03/2003 06:00:00	4.230994956	5.368656146
21/03/2003 07:00:00	5.084464005	6.104991483
21/03/2003 08:00:00	6.251027994	7.114313021
21/03/2003 09:00:00	7.621304833	8.301925319
21/03/2003 10:00:00	9.085912434	9.573132934
21/03/2003 11:00:00	10.53546871	10.83324042
21/03/2003 12:00:00	11.86059157	11.98755234
21/03/2003 13:00:00	12.95189892	12.94137325
21/03/2003 14:00:00	13.70000868	13.60000771
21/03/2003 15:00:00	14.02349317	13.89297936
21/03/2003 16:00:00	13.95273695	13.84668356
21/03/2003 17:00:00	13.54607629	13.5117324
21/03/2003 18:00:00	12.86184746	12.93873798
21/03/2003 19:00:00	11.95838673	12.1783124
21/03/2003 20:00:00	10.89403038	11.28106777
21/03/2003 21:00:00	9.727114679	10.29761619
21/03/2003 22:00:00	8.515975899	9.278569754
21/03/2003 23:00:00	7.318950312	8.274540564
22/03/2003 00:00:00	6.19437419	7.336140723
22/03/2003 01:00:00	5.200583806	6.51398233
22/03/2003 02:00:00	4.395915432	5.858677488
22/03/2003 03:00:00	3.83870534	5.420838296
22/03/2003 04:00:00	3.587289802	5.251076856
22/03/2003 05:00:00	3.70000509	5.400005267
22/03/2003 06:00:00	4.21032247	5.895968009
22/03/2003 07:00:00	5.052258006	6.678243392
22/03/2003 08:00:00	6.134965176	7.663844269
22/03/2003 09:00:00	7.367597454	8.769783494
22/03/2003 10:00:00	8.659308316	9.913073919
22/03/2003 11:00:00	9.919251237	11.0107284
22/03/2003 12:00:00	11.05657969	11.97975978
22/03/2003 13:00:00	11.98044716	12.73718093
22/03/2003 14:00:00	12.60000711	13.20000468
22/03/2003 15:00:00	12.84876944	13.30827921
22/03/2003 16:00:00	12.75766492	13.09418936
22/03/2003 17:00:00	12.38197835	12.61295305
22/03/2003 18:00:00	11.77699457	11.91978819
22/03/2003 19:00:00	10.99799836	11.06991269
22/03/2003 20:00:00	10.10027455	10.11854448
22/03/2003 21:00:00	9.139107954	9.120901458
22/03/2003 22:00:00	8.169783372	8.132201539
22/03/2003 23:00:00	7.247585619	7.207662637
23/03/2003 00:00:00	6.427799507	6.402502665
23/03/2003 01:00:00	5.765709847	5.771939536
23/03/2003 02:00:00	5.316601451	5.371191163
23/03/2003 03:00:00	5.13575913	5.255475458
23/03/2003 04:00:00	5.278467694	5.480010335
23/03/2003 05:00:00	5.800011956	6.100013706
23/03/2003 06:00:00	6.729251013	7.143147993
23/03/2003 07:00:00	7.989346307	8.526859076
23/03/2003 08:00:00	9.477036165	10.14104005
23/03/2003 09:00:00	11.08905891	11.87558402
23/03/2003 10:00:00	12.72215288	13.62038407
23/03/2003 11:00:00	14.27305639	15.26533331
23/03/2003 12:00:00	15.63850778	16.70032484
23/03/2003 13:00:00	16.71524537	17.81525174
23/03/2003 14:00:00	17.40000748	18.50000713
23/03/2003 15:00:00	17.61815112	18.67545499
23/03/2003 16:00:00	17.40950232	18.38633677
23/03/2003 17:00:00	16.84250297	17.70836177
23/03/2003 18:00:00	15.98559494	16.71723928
23/03/2003 19:00:00	14.90722012	15.48867858
23/03/2003 20:00:00	13.67582038	14.09838896
23/03/2003 21:00:00	12.35983761	12.62207972
23/03/2003 22:00:00	11.02771369	11.13546015
23/03/2003 23:00:00	9.747890502	9.714239526
24/03/2003 00:00:00	8.588809924	8.434127147
24/03/2003 01:00:00	7.618913837	7.3708323
24/03/2003 02:00:00	6.906644123	6.600064276
24/03/2003 03:00:00	6.520442664	6.197532363
24/03/2003 04:00:00	6.52875134	6.238945852
24/03/2003 05:00:00	7.000012033	6.800014032
24/03/2003 06:00:00	7.971297473	7.921429406
24/03/2003 07:00:00	9.35421004	9.503824296
24/03/2003 08:00:00	11.02898608	11.41281772
24/03/2003 09:00:00	12.87586195	13.51402871
24/03/2003 10:00:00	14.775074	15.67307627
24/03/2003 11:00:00	16.60685857	17.75557943
24/03/2003 12:00:00	18.25145202	19.62715721
24/03/2003 13:00:00	19.5890907	21.15342862
24/03/2003 14:00:00	20.50001095	22.20001269
24/03/2003 15:00:00	20.89680077	22.66839464
24/03/2003 16:00:00	20.82144824	22.60351733
24/03/2003 17:00:00	20.34828985	22.08618623
24/03/2003 18:00:00	19.55166208	21.19720682
24/03/2003 19:00:00	18.50590143	20.01738458
24/03/2003 20:00:00	17.28534438	18.62752497
24/03/2003 21:00:00	15.96432743	17.10843348
24/03/2003 22:00:00	14.61718705	15.54091558
24/03/2003 23:00:00	13.31825975	14.00577675
25/03/2003 00:00:00	12.14188201	12.58382246
25/03/2003 01:00:00	11.16239032	11.35585818
25/03/2003 02:00:00	10.45412116	10.4026894
25/03/2003 03:00:00	10.09141103	9.805121586
25/03/2003 04:00:00	10.14859642	9.643960215
25/03/2003 05:00:00	10.70001381	10.00001076
25/03/2003 06:00:00	11.78615906	10.9190814
[truncated: 6,761 more rows]
