# Supplementary material for: Flood Prediction in Ungauged Basins by Physical-Based TOPKAPI Model
Source: Hindawi journal article supplement (doi:10.1155/2019/4795853), 2019-09-05
Supplement: f1 [file 4795853.f1.zip › 4795853.f1/xxdtemp_2004.csv]

time	57290	57297
01/01/2004 00:00:00	-23.74160905	-27.90317465
01/01/2004 01:00:00	-17.09815692	-20.81997709
01/01/2004 02:00:00	-11.25538938	-14.59481871
01/01/2004 03:00:00	-6.17018672	-9.18094135
01/01/2004 04:00:00	-1.799429218	-4.531586831
01/01/2004 05:00:00	1.900002838	-0.599996985
01/01/2004 06:00:00	4.971229167	2.660586358
01/01/2004 07:00:00	7.457369483	5.296921369
01/01/2004 08:00:00	9.401543504	7.35576622
01/01/2004 09:00:00	10.84687095	8.883879079
01/01/2004 10:00:00	11.83647152	9.928018119
01/01/2004 11:00:00	12.41346495	10.53494151
01/01/2004 12:00:00	12.62097095	10.75140742
01/01/2004 13:00:00	12.50210923	10.62417403
01/01/2004 14:00:00	12.09999952	10.19999949
01/01/2004 15:00:00	11.45776152	9.525641991
01/01/2004 16:00:00	10.61851495	8.647859694
01/01/2004 17:00:00	9.625379531	7.613410771
01/01/2004 18:00:00	8.521474976	6.469053393
01/01/2004 19:00:00	7.349921003	5.26154573
01/01/2004 20:00:00	6.153837326	4.037645954
01/01/2004 21:00:00	4.976343663	2.844112233
01/01/2004 22:00:00	3.860559728	1.727702741
01/01/2004 23:00:00	2.849605238	0.735175645
02/01/2004 00:00:00	1.986599909	-0.086710881
02/01/2004 01:00:00	1.314663458	-0.691198669
02/01/2004 02:00:00	0.876915599	-1.031529547
02/01/2004 03:00:00	0.71647605	-1.060945346
02/01/2004 04:00:00	0.876464526	-0.732687893
02/01/2004 05:00:00	1.400000743	9.80927E-07
02/01/2004 06:00:00	2.30662928	1.157667149
02/01/2004 07:00:00	3.521594459	2.656007619
02/01/2004 08:00:00	4.94656561	4.384507262
02/01/2004 09:00:00	6.483212064	6.232650951
02/01/2004 10:00:00	8.033203151	8.089923557
02/01/2004 11:00:00	9.498208202	9.845809952
02/01/2004 12:00:00	10.77989655	11.38979501
02/01/2004 13:00:00	11.77993751	12.6113636
02/01/2004 14:00:00	12.40000044	13.40000059
02/01/2004 15:00:00	12.568884	13.67537541
02/01/2004 16:00:00	12.32390392	13.47789524
02/01/2004 17:00:00	11.72950511	12.87815163
02/01/2004 18:00:00	10.85013245	11.94673612
02/01/2004 19:00:00	9.750230849	10.75424024
02/01/2004 20:00:00	8.494245205	9.371255543
02/01/2004 21:00:00	7.146620414	7.868373564
02/01/2004 22:00:00	5.771801375	6.316185842
02/01/2004 23:00:00	4.434232985	4.785283919
03/01/2004 00:00:00	3.198360143	3.346259335
03/01/2004 01:00:00	2.128627746	2.069703629
03/01/2004 02:00:00	1.289480694	1.026208343
03/01/2004 03:00:00	0.745363883	0.286365015
03/01/2004 04:00:00	0.560722212	-0.079234813
03/01/2004 05:00:00	0.800000579	3.98059E-07
03/01/2004 06:00:00	1.49929905	0.565473757
03/01/2004 07:00:00	2.58133878	1.541835075
03/01/2004 08:00:00	3.940496301	2.824545944
03/01/2004 09:00:00	5.471148142	4.309067958
03/01/2004 10:00:00	7.067670837	5.890862709
03/01/2004 11:00:00	8.624440915	7.46539179
03/01/2004 12:00:00	10.03583491	8.928116795
03/01/2004 13:00:00	11.19622935	10.17449932
03/01/2004 14:00:00	12.00000076	11.10000095
03/01/2004 15:00:00	12.36889235	11.62636761
03/01/2004 16:00:00	12.33411353	11.78048216
03/01/2004 17:00:00	11.95424016	11.61551155
03/01/2004 18:00:00	11.2878481	11.18462277
03/01/2004 19:00:00	10.39351324	10.54098278
03/01/2004 20:00:00	9.329811425	9.737758559
03/01/2004 21:00:00	8.155318529	8.828117078
03/01/2004 22:00:00	6.928610417	7.865225307
03/01/2004 23:00:00	5.708262956	6.902250219
04/01/2004 00:00:00	4.552852011	5.992358786
04/01/2004 01:00:00	3.520953449	5.18871798
04/01/2004 02:00:00	2.671143136	4.544494774
04/01/2004 03:00:00	2.061996937	4.112856138
04/01/2004 04:00:00	1.752090719	3.946969045
04/01/2004 05:00:00	1.800000349	4.100000468
04/01/2004 06:00:00	2.239475922	4.602207597
04/01/2004 07:00:00	3.00496488	5.392208896
04/01/2004 08:00:00	4.006089106	6.385713242
04/01/2004 09:00:00	5.152470481	7.49842951
04/01/2004 10:00:00	6.353730889	8.646066579
04/01/2004 11:00:00	7.519492212	9.744333325
04/01/2004 12:00:00	8.559376333	10.70893862
04/01/2004 13:00:00	9.383005133	11.45559136
04/01/2004 14:00:00	9.900000496	11.90000039
04/01/2004 15:00:00	10.04407276	11.98060688
04/01/2004 16:00:00	9.845285663	11.72678061
04/01/2004 17:00:00	9.357791179	11.19062343
04/01/2004 18:00:00	8.635741285	10.42423719
04/01/2004 19:00:00	7.733287958	9.479723749
04/01/2004 20:00:00	6.704583175	8.409184955
04/01/2004 21:00:00	5.603778912	7.264722661
04/01/2004 22:00:00	4.485027147	6.098438718
04/01/2004 23:00:00	3.402479855	4.962434979
05/01/2004 00:00:00	2.410289015	3.908813295
05/01/2004 01:00:00	1.562606602	2.989675519
05/01/2004 02:00:00	0.913584592	2.257123502
05/01/2004 03:00:00	0.517374964	1.763259097
05/01/2004 04:00:00	0.428129693	1.560184155
05/01/2004 05:00:00	0.700000757	1.700000528
05/01/2004 06:00:00	1.362541739	2.211373395
05/01/2004 07:00:00	2.346913132	3.029221689
05/01/2004 08:00:00	3.559677274	4.065027896
05/01/2004 09:00:00	4.9073965	5.230274501
05/01/2004 10:00:00	6.296633149	6.43644399
05/01/2004 11:00:00	7.633949557	7.595018849
05/01/2004 12:00:00	8.825908062	8.617481563
05/01/2004 13:00:00	9.779071002	9.415314619
05/01/2004 14:00:00	10.40000071	9.900000502
05/01/2004 15:00:00	10.62035347	10.00708086
05/01/2004 16:00:00	10.47216082	9.768333485
05/01/2004 17:00:00	10.01254797	9.239595104
05/01/2004 18:00:00	9.298640164	8.476702431
05/01/2004 19:00:00	8.387562615	7.535492183
05/01/2004 20:00:00	7.336440551	6.471801079
05/01/2004 21:00:00	6.202399195	5.341465836
05/01/2004 22:00:00	5.042563774	4.200323171
05/01/2004 23:00:00	3.914059511	3.104209803
06/01/2004 00:00:00	2.87401163	2.108962448
06/01/2004 01:00:00	1.979545358	1.270417825
06/01/2004 02:00:00	1.287785918	0.644412651
06/01/2004 03:00:00	0.855858534	0.286783644
06/01/2004 04:00:00	0.740888433	0.253367521
06/01/2004 05:00:00	1.000000837	0.600000999
06/01/2004 06:00:00	1.665504137	1.357232622
06/01/2004 07:00:00	2.670439917	2.454458773
06/01/2004 08:00:00	3.923033192	3.795787934
06/01/2004 09:00:00	5.331508979	5.285328588
06/01/2004 10:00:00	6.804092296	6.827189216
06/01/2004 11:00:00	8.249008157	8.325478301
06/01/2004 12:00:00	9.57448158	9.684304324
06/01/2004 13:00:00	10.68873758	10.80777577
06/01/2004 14:00:00	11.50000118	11.60000111
06/01/2004 15:00:00	11.93966702	11.98982153
06/01/2004 16:00:00	12.03180781	12.00500838
06/01/2004 17:00:00	11.82366561	11.69806545
06/01/2004 18:00:00	11.3624825	11.12149649
06/01/2004 19:00:00	10.69550054	10.3278053
06/01/2004 20:00:00	9.869961807	9.369495633
06/01/2004 21:00:00	8.93310837	8.299071271
06/01/2004 22:00:00	7.9321823	7.169035988
06/01/2004 23:00:00	6.914425668	6.031893557
07/01/2004 00:00:00	5.927080545	4.940147752
07/01/2004 01:00:00	5.017389002	3.946302346
07/01/2004 02:00:00	4.232593109	3.102861112
07/01/2004 03:00:00	3.619934938	2.462327826
07/01/2004 04:00:00	3.22665656	2.07720626
07/01/2004 05:00:00	3.100000045	2.000000188
07/01/2004 06:00:00	3.268616121	2.262329233
07/01/2004 07:00:00	3.686790594	2.812276918
07/01/2004 08:00:00	4.290218148	3.577042864
07/01/2004 09:00:00	5.014593467	4.483826692
07/01/2004 10:00:00	5.795611236	5.459828023
07/01/2004 11:00:00	6.568966139	6.432246479
07/01/2004 12:00:00	7.270352862	7.32828168
07/01/2004 13:00:00	7.835466087	8.075133248
07/01/2004 14:00:00	8.200000501	8.600000804
07/01/2004 15:00:00	8.315985417	8.848208319
07/01/2004 16:00:00	8.200788261	8.837576711
07/01/2004 17:00:00	7.888110887	8.604051022
07/01/2004 18:00:00	7.411655148	8.183576295
07/01/2004 19:00:00	6.8051229	7.612097573
07/01/2004 20:00:00	6.102215994	6.925559899
07/01/2004 21:00:00	5.336636285	6.159908315
07/01/2004 22:00:00	4.542085626	5.351087864
07/01/2004 23:00:00	3.752265872	4.535043589
08/01/2004 00:00:00	3.000878874	3.747720533
08/01/2004 01:00:00	2.321626489	3.025063738
08/01/2004 02:00:00	1.748210568	2.403018247
08/01/2004 03:00:00	1.314332966	1.917529103
08/01/2004 04:00:00	1.053695537	1.604541348
08/01/2004 05:00:00	1.000000133	1.500000025
08/01/2004 06:00:00	1.173244911	1.6257621
08/01/2004 07:00:00	1.538613591	1.947332593
08/01/2004 08:00:00	2.047586375	2.416128634
08/01/2004 09:00:00	2.651643466	2.983567349
08/01/2004 10:00:00	3.302265065	3.601065869
08/01/2004 11:00:00	3.950931375	4.22004132
08/01/2004 12:00:00	4.549122598	4.791910832
08/01/2004 13:00:00	5.048318936	5.268091532
08/01/2004 14:00:00	5.400000591	5.60000055
08/01/2004 15:00:00	5.567950064	5.751164813
08/01/2004 16:00:00	5.565158725	5.733550126
08/01/2004 17:00:00	5.416920075	5.571231929
08/01/2004 18:00:00	5.148527613	5.288285663
08/01/2004 19:00:00	4.785274843	4.908786768
08/01/2004 20:00:00	4.352455264	4.456810685
08/01/2004 21:00:00	3.875362378	3.956432854
08/01/2004 22:00:00	3.379289687	3.431728716
08/01/2004 23:00:00	2.889530692	2.90677371
09/01/2004 00:00:00	2.431378893	2.405643279
09/01/2004 01:00:00	2.030127793	1.952412861
09/01/2004 02:00:00	1.711070891	1.571157898
09/01/2004 03:00:00	1.499501691	1.28595383
09/01/2004 04:00:00	1.420713692	1.120876097
09/01/2004 05:00:00	1.500000396	1.100000141
09/01/2004 06:00:00	1.751680791	1.237286599
09/01/2004 07:00:00	2.146176124	1.50623719
09/01/2004 08:00:00	2.642933283	1.870238977
09/01/2004 09:00:00	3.201399159	2.292679019
09/01/2004 10:00:00	3.781020642	2.73694438
09/01/2004 11:00:00	4.34124462	3.166422119
09/01/2004 12:00:00	4.841517984	3.544499298
09/01/2004 13:00:00	5.241287624	3.834562979
09/01/2004 14:00:00	5.500000428	4.000000223
09/01/2004 15:00:00	5.587776616	4.014085688
09/01/2004 16:00:00	5.517429418	3.889644132
09/01/2004 17:00:00	5.312445233	3.649387766
09/01/2004 18:00:00	4.996310465	3.316028799
09/01/2004 19:00:00	4.592511513	2.912279442
09/01/2004 20:00:00	4.124534779	2.460851904
09/01/2004 21:00:00	3.615866665	1.984458395
09/01/2004 22:00:00	3.089993572	1.505811126
09/01/2004 23:00:00	2.570401903	1.047622306
10/01/2004 00:00:00	2.080578057	0.632604145
10/01/2004 01:00:00	1.644008436	0.283468854
10/01/2004 02:00:00	1.284179443	0.022928643
10/01/2004 03:00:00	1.024577478	-0.12630428
10/01/2004 04:00:00	0.888688942	-0.141517702
10/01/2004 05:00:00	0.900000238	5.84105E-07
10/01/2004 06:00:00	1.071571014	0.310435823
10/01/2004 07:00:00	1.374754232	0.759865716
10/01/2004 08:00:00	1.77047626	1.307841158
10/01/2004 09:00:00	2.219663467	1.913913046
10/01/2004 10:00:00	2.683242223	2.537632276
10/01/2004 11:00:00	3.122138898	3.138549744
10/01/2004 12:00:00	3.49727986	3.676216347
10/01/2004 13:00:00	3.769591478	4.11018298
10/01/2004 14:00:00	3.900000123	4.400000539
10/01/2004 15:00:00	3.860526258	4.516081044
10/01/2004 16:00:00	3.667566382	4.472280656
10/01/2004 17:00:00	3.348610913	4.293316488
10/01/2004 18:00:00	2.931150269	4.003905652
10/01/2004 19:00:00	2.442674867	3.628765262
10/01/2004 20:00:00	1.910675127	3.192612429
10/01/2004 21:00:00	1.362641465	2.720164267
10/01/2004 22:00:00	0.8260643	2.236137887
10/01/2004 23:00:00	0.32843405	1.765250402
11/01/2004 00:00:00	-0.102758867	1.332218925
11/01/2004 01:00:00	-0.440024033	0.961760568
11/01/2004 02:00:00	-0.65587103	0.678592445
11/01/2004 03:00:00	-0.722809441	0.507431666
11/01/2004 04:00:00	-0.613348846	0.472995346
11/01/2004 05:00:00	-0.299998828	0.600000596
11/01/2004 06:00:00	0.231108031	0.901660683
11/01/2004 07:00:00	0.939347604	1.345173873
11/01/2004 08:00:00	1.770472989	1.886234774
11/01/2004 09:00:00	2.670237286	2.480537997
11/01/2004 10:00:00	3.584393592	3.083778152
11/01/2004 11:00:00	4.458695005	3.651649847
11/01/2004 12:00:00	5.238894625	4.139847693
11/01/2004 13:00:00	5.87074555	4.504066299
11/01/2004 14:00:00	6.300000878	4.700000275
11/01/2004 15:00:00	6.487187316	4.69610961
11/01/2004 16:00:00	6.451925507	4.511915374
11/01/2004 17:00:00	6.228609449	4.179703802
11/01/2004 18:00:00	5.85163314	3.731761126
11/01/2004 19:00:00	5.35539058	3.200373581
11/01/2004 20:00:00	4.774275769	2.617827398
11/01/2004 21:00:00	4.142682704	2.016408812
11/01/2004 22:00:00	3.495005386	1.428404056
11/01/2004 23:00:00	2.865637812	0.886099363
12/01/2004 00:00:00	2.288973983	0.421780966
12/01/2004 01:00:00	1.799407897	0.067735099
12/01/2004 02:00:00	1.431333553	-0.143752005
12/01/2004 03:00:00	1.21914495	-0.180394112
12/01/2004 04:00:00	1.197236087	-0.00990499
12/01/2004 05:00:00	1.400000964	0.400001595
12/01/2004 06:00:00	1.845358535	1.064066917
12/01/2004 07:00:00	2.48532816	1.92685303
12/01/2004 08:00:00	3.255454447	2.915377341
12/01/2004 09:00:00	4.091282006	3.956657256
12/01/2004 10:00:00	4.928355443	4.97771018
12/01/2004 11:00:00	5.702219368	5.905553519
12/01/2004 12:00:00	6.348418387	6.66720468
12/01/2004 13:00:00	6.80249711	7.189681069
12/01/2004 14:00:00	7.000000144	7.40000009
12/01/2004 15:00:00	6.894859277	7.246759265
12/01/2004 16:00:00	6.514554346	6.764875779
12/01/2004 17:00:00	5.904952034	6.010846542
12/01/2004 18:00:00	5.111919025	5.041168462
12/01/2004 19:00:00	4.181322001	3.912338449
12/01/2004 20:00:00	3.159027645	2.680853411
12/01/2004 21:00:00	2.090902641	1.403210257
12/01/2004 22:00:00	1.022813671	0.135905896
12/01/2004 23:00:00	0.00062742	-1.064562763
13/01/2004 00:00:00	-0.929789431	-2.141698811
13/01/2004 01:00:00	-1.722570199	-3.039005341
13/01/2004 02:00:00	-2.331848199	-3.699985441
13/01/2004 03:00:00	-2.711756749	-4.068142205
13/01/2004 04:00:00	-2.816429166	-4.086978723
13/01/2004 05:00:00	-2.599998767	-3.699998086
13/01/2004 06:00:00	-2.036716324	-2.876309344
13/01/2004 07:00:00	-1.181301673	-1.68744441
13/01/2004 08:00:00	-0.108591725	-0.230540677
13/01/2004 09:00:00	1.106576607	1.397264467
13/01/2004 10:00:00	2.389366413	3.098833631
13/01/2004 11:00:00	3.664940781	4.777029425
13/01/2004 12:00:00	4.858462798	6.334714459
13/01/2004 13:00:00	5.895095553	7.674751343
13/01/2004 14:00:00	6.700002136	8.700002687
13/01/2004 15:00:00	7.216930287	9.33761248
13/01/2004 16:00:00	7.463965644	9.611849292
13/01/2004 17:00:00	7.477778141	9.571262604
13/01/2004 18:00:00	7.295037711	9.264401897
13/01/2004 19:00:00	6.952414287	8.739816652
13/01/2004 20:00:00	6.486577802	8.046056349
13/01/2004 21:00:00	5.934198188	7.231670471
13/01/2004 22:00:00	5.33194538	6.345208496
13/01/2004 23:00:00	4.71648931	5.435219907
14/01/2004 00:00:00	4.12449991	4.550254184
14/01/2004 01:00:00	3.592647115	3.738860809
14/01/2004 02:00:00	3.157600857	3.049589261
14/01/2004 03:00:00	2.85603107	2.530989022
14/01/2004 04:00:00	2.724607685	2.231609573
14/01/2004 05:00:00	2.800000637	2.200000395
14/01/2004 06:00:00	3.103878613	2.465813896
14/01/2004 07:00:00	3.59790592	2.983114953
14/01/2004 08:00:00	4.228745921	3.687071746
14/01/2004 09:00:00	4.943061977	4.512852457
14/01/2004 10:00:00	5.68751745	5.39562527
14/01/2004 11:00:00	6.408775702	6.270558364
14/01/2004 12:00:00	7.053500096	7.072819922
14/01/2004 13:00:00	7.568353994	7.737578126
14/01/2004 14:00:00	7.900000758	8.200001158
14/01/2004 15:00:00	8.009023605	8.411562394
14/01/2004 16:00:00	7.911684614	8.388955329
14/01/2004 17:00:00	7.638165431	8.165178319
14/01/2004 18:00:00	7.218647705	7.773229721
14/01/2004 19:00:00	6.683313084	7.24610789
14/01/2004 20:00:00	6.062343216	6.616811183
14/01/2004 21:00:00	5.385919749	5.918337955
14/01/2004 22:00:00	4.684224332	5.183686564
14/01/2004 23:00:00	3.987438613	4.445855365
15/01/2004 00:00:00	3.32574424	3.737842714
15/01/2004 01:00:00	2.72932286	3.092646968
15/01/2004 02:00:00	2.228356123	2.543266484
15/01/2004 03:00:00	1.853025676	2.122699616
15/01/2004 04:00:00	1.633513167	1.863944722
15/01/2004 05:00:00	1.600000245	1.800000157
15/01/2004 06:00:00	1.769982106	1.950372118
15/01/2004 07:00:00	2.110208673	2.280598732
15/01/2004 08:00:00	2.574743685	2.742726252
15/01/2004 09:00:00	3.117650884	3.28880093
15/01/2004 10:00:00	3.692994008	3.87086902
15/01/2004 11:00:00	4.254836797	4.440976774
15/01/2004 12:00:00	4.757242992	4.951170445
15/01/2004 13:00:00	5.154276332	5.353496286
15/01/2004 14:00:00	5.400000557	5.600000549
15/01/2004 15:00:00	5.460215195	5.654999115
15/01/2004 16:00:00	5.347662422	5.531885839
15/01/2004 17:00:00	5.086819946	5.25632394
15/01/2004 18:00:00	4.702165477	4.853976636
15/01/2004 19:00:00	4.218176727	4.350507145
15/01/2004 20:00:00	3.659331403	3.771578685
15/01/2004 21:00:00	3.050107216	3.142854474
15/01/2004 22:00:00	2.414981875	2.489997731
15/01/2004 23:00:00	1.778433091	1.838671673
16/01/2004 00:00:00	1.164938572	1.214539519
16/01/2004 01:00:00	0.59897603	0.643264486
16/01/2004 02:00:00	0.105023173	0.150509794
16/01/2004 03:00:00	-0.292442288	-0.238061341
16/01/2004 04:00:00	-0.568942645	-0.496785699
16/01/2004 05:00:00	-0.700000187	-0.600000063
16/01/2004 06:00:00	-0.670608121	-0.53219694
16/01/2004 07:00:00	-0.503642901	-0.318491289
16/01/2004 08:00:00	-0.231451685	0.005846435
16/01/2004 09:00:00	0.113618368	0.405545773
16/01/2004 10:00:00	0.4992201	0.84533627
16/01/2004 11:00:00	0.893006352	1.289947468
16/01/2004 12:00:00	1.262629965	1.704108911
16/01/2004 13:00:00	1.575743781	2.052550141
16/01/2004 14:00:00	1.800000641	2.300000702
16/01/2004 15:00:00	1.910963115	2.419869054
16/01/2004 16:00:00	1.915832324	2.420278926
16/01/2004 17:00:00	1.829718941	2.318032768
16/01/2004 18:00:00	1.667733635	2.12993303
16/01/2004 19:00:00	1.444987077	1.872782161
16/01/2004 20:00:00	1.176589938	1.56338261
16/01/2004 21:00:00	0.877652888	1.218536826
16/01/2004 22:00:00	0.563286599	0.85504726
16/01/2004 23:00:00	0.248601741	0.48971636
17/01/2004 00:00:00	-0.051291016	0.139346576
17/01/2004 01:00:00	-0.321281	-0.179259642
17/01/2004 02:00:00	-0.546257542	-0.449299846
17/01/2004 03:00:00	-0.711109969	-0.653971586
17/01/2004 04:00:00	-0.800727613	-0.776472413
17/01/2004 05:00:00	-0.799999801	-0.799999877
17/01/2004 06:00:00	-0.700352772	-0.714767319
17/01/2004 07:00:00	-0.51936009	-0.539050916
17/01/2004 08:00:00	-0.281132075	-0.29814247
17/01/2004 09:00:00	-0.009779048	-0.017333783
17/01/2004 10:00:00	0.270588673	0.278083344
17/01/2004 11:00:00	0.535860767	0.562817107
17/01/2004 12:00:00	0.761926916	0.811575705
17/01/2004 13:00:00	0.924676798	0.999067335
17/01/2004 14:00:00	1.000000094	1.100000196
17/01/2004 15:00:00	0.970766225	1.096185227
17/01/2004 16:00:00	0.847763236	0.997843995
17/01/2004 17:00:00	0.648758748	0.82230064
17/01/2004 18:00:00	0.39152038	0.586879299
17/01/2004 19:00:00	0.093815751	0.308904113
17/01/2004 20:00:00	-0.226587519	0.00569922
17/01/2004 21:00:00	-0.55192181	-0.305411241
17/01/2004 22:00:00	-0.864419503	-0.607103131
17/01/2004 23:00:00	-1.146312978	-0.88205231
18/01/2004 00:00:00	-1.379834616	-1.11293464
18/01/2004 01:00:00	-1.547216798	-1.282425982
18/01/2004 02:00:00	-1.630691903	-1.373202196
18/01/2004 03:00:00	-1.612492313	-1.367939144
18/01/2004 04:00:00	-1.474850407	-1.249312687
18/01/2004 05:00:00	-1.199998566	-0.999998685
18/01/2004 06:00:00	-0.780566778	-0.612938202
18/01/2004 07:00:00	-0.250774946	-0.122132602
18/01/2004 08:00:00	0.344759676	0.428151798
18/01/2004 09:00:00	0.961419833	0.993648686
18/01/2004 10:00:00	1.55458827	1.530091745
18/01/2004 11:00:00	2.079647734	1.993214663
18/01/2004 12:00:00	2.491980969	2.338751123
18/01/2004 13:00:00	2.746970722	2.522434812
18/01/2004 14:00:00	2.799999738	2.499999414
18/01/2004 15:00:00	2.620341173	2.241303794
18/01/2004 16:00:00	2.232829132	1.772706819
18/01/2004 17:00:00	1.676187783	1.134692182
18/01/2004 18:00:00	0.989141293	0.367743574
18/01/2004 19:00:00	0.210413831	-0.487655311
18/01/2004 20:00:00	-0.621270438	-1.391020783
18/01/2004 21:00:00	-1.467187344	-2.301869148
18/01/2004 22:00:00	-2.28861272	-3.179716714
18/01/2004 23:00:00	-3.046822399	-3.98407979
19/01/2004 00:00:00	-3.703092214	-4.674474683
19/01/2004 01:00:00	-4.218697995	-5.2104177
19/01/2004 02:00:00	-4.554915577	-5.55142515
19/01/2004 03:00:00	-4.67302079	-5.65701334
19/01/2004 04:00:00	-4.534289469	-5.486698578
19/01/2004 05:00:00	-4.099997444	-4.999997172
19/01/2004 06:00:00	-3.350760068	-4.177135572
19/01/2004 07:00:00	-2.344549772	-3.081179738
19/01/2004 08:00:00	-1.158678009	-1.795905234
19/01/2004 09:00:00	0.12954377	-0.405087629
19/01/2004 10:00:00	1.442804112	1.007497511
19/01/2004 11:00:00	2.703791564	2.35807462
19/01/2004 12:00:00	3.835194675	3.56286813
19/01/2004 13:00:00	4.759701992	4.538102473
19/01/2004 14:00:00	5.400002064	5.200002085
19/01/2004 15:00:00	5.699516181	5.487499544
19/01/2004 16:00:00	5.684595525	5.430358829
19/01/2004 17:00:00	5.402323479	5.08105147
19/01/2004 18:00:00	4.899783424	4.492048997
19/01/2004 19:00:00	4.224058743	3.71582294
19/01/2004 20:00:00	3.422232818	2.80484483
19/01/2004 21:00:00	2.54138903	1.811586196
19/01/2004 22:00:00	1.628610763	0.788518569
19/01/2004 23:00:00	0.730981398	-0.211886521
20/01/2004 00:00:00	-0.104415682	-1.137157544
20/01/2004 01:00:00	-0.830497096	-1.93482297
20/01/2004 02:00:00	-1.400179462	-2.552411269
20/01/2004 03:00:00	-1.766379396	-2.93745091
20/01/2004 04:00:00	-1.882013518	-3.037470363
20/01/2004 05:00:00	-1.699998445	-2.799998098
20/01/2004 06:00:00	-1.194377395	-2.19572086
20/01/2004 07:00:00	-0.423698857	-1.287957244
20/01/2004 08:00:00	0.532362652	-0.163183497
20/01/2004 09:00:00	1.594132612	1.092124136
20/01/2004 10:00:00	2.681936504	2.391489409
20/01/2004 11:00:00	3.716099809	3.648436074
20/01/2004 12:00:00	4.616948009	4.776487886
20/01/2004 13:00:00	5.304806583	5.689168599
20/01/2004 14:00:00	5.700001014	6.300001966
20/01/2004 15:00:00	5.744448302	6.545197371
20/01/2004 16:00:00	5.466430355	6.451705484
20/01/2004 17:00:00	4.915820009	6.069161981
20/01/2004 18:00:00	4.142490099	5.447202542
20/01/2004 19:00:00	3.196313463	4.635462845
20/01/2004 20:00:00	2.127162937	3.683578568
20/01/2004 21:00:00	0.984911357	2.641185388
20/01/2004 22:00:00	-0.18056844	1.557918986
20/01/2004 23:00:00	-1.319403618	0.483415039
21/01/2004 00:00:00	-2.38172134	-0.532690776
21/01/2004 01:00:00	-3.31764877	-1.440762779
21/01/2004 02:00:00	-4.077313071	-2.191165292
21/01/2004 03:00:00	-4.610841408	-2.734262637
21/01/2004 04:00:00	-4.868360943	-3.020419136
21/01/2004 05:00:00	-4.79999884	-2.99999911
21/01/2004 06:00:00	-4.377293983	-2.645136166
21/01/2004 07:00:00	-3.657430938	-2.015039832
21/01/2004 08:00:00	-2.71900539	-1.190688309
21/01/2004 09:00:00	-1.640613023	-0.253059796
21/01/2004 10:00:00	-0.500849522	0.716867503
21/01/2004 11:00:00	0.621689427	1.638115389
21/01/2004 12:00:00	1.648408141	2.42970566
21/01/2004 13:00:00	2.500710934	3.010660115
21/01/2004 14:00:00	3.100002122	3.300000554
21/01/2004 15:00:00	3.3881358	3.23953982
21/01/2004 16:00:00	3.388764019	2.862253641
21/01/2004 17:00:00	3.145988028	2.223908141
21/01/2004 18:00:00	2.703909074	1.380269442
21/01/2004 19:00:00	2.106628407	0.387103668
21/01/2004 20:00:00	1.398247274	-0.699823058
21/01/2004 21:00:00	0.622866924	-1.824744612
21/01/2004 22:00:00	-0.175411394	-2.931894872
21/01/2004 23:00:00	-0.952486433	-3.965507715
22/01/2004 00:00:00	-1.664256944	-4.869817016
22/01/2004 01:00:00	-2.266621679	-5.589056653
22/01/2004 02:00:00	-2.715479388	-6.067460503
22/01/2004 03:00:00	-2.966728825	-6.249262442
22/01/2004 04:00:00	-2.976268741	-6.078696348
22/01/2004 05:00:00	-2.699997886	-5.499996096
22/01/2004 06:00:00	-2.113190612	-4.484248793
22/01/2004 07:00:00	-1.268622532	-3.109952895
22/01/2004 08:00:00	-0.238444292	-1.4824593
22/01/2004 09:00:00	0.905193464	0.292881091
22/01/2004 10:00:00	2.09014009	2.110717379
22/01/2004 11:00:00	3.244244939	3.865698664
22/01/2004 12:00:00	4.295357368	5.452474048
22/01/2004 13:00:00	5.171326729	6.765692629
22/01/2004 14:00:00	5.800002378	7.700003509
22/01/2004 15:00:00	6.12784357	8.177668873
22/01/2004 16:00:00	6.175748064	8.231401605
22/01/2004 17:00:00	5.983222966	7.921526857
22/01/2004 18:00:00	5.589775384	7.308369778
22/01/2004 19:00:00	5.034912425	6.452255519
22/01/2004 20:00:00	4.358141196	5.413509232
22/01/2004 21:00:00	3.598968804	4.252456066
22/01/2004 22:00:00	2.796902357	3.029421172
22/01/2004 23:00:00	1.991448961	1.804729701
23/01/2004 00:00:00	1.222115725	0.638706803
23/01/2004 01:00:00	0.528409754	-0.408322372
23/01/2004 02:00:00	-0.050161843	-1.276032673
23/01/2004 03:00:00	-0.474091959	-1.904098948
23/01/2004 04:00:00	-0.703873488	-2.232196048
23/01/2004 05:00:00	-0.699999322	-2.199998823
23/01/2004 06:00:00	-0.440339882	-1.772911782
23/01/2004 07:00:00	0.027725351	-1.019256517
23/01/2004 08:00:00	0.639439898	-0.033083499
23/01/2004 09:00:00	1.330047277	1.091556802
23/01/2004 10:00:00	2.034791008	2.260613915
23/01/2004 11:00:00	2.688914611	3.38003737
23/01/2004 12:00:00	3.227661605	4.355776694
23/01/2004 13:00:00	3.58627551	5.093781419
23/01/2004 14:00:00	3.699999844	5.500001073
23/01/2004 15:00:00	3.522571815	5.505889326
23/01/2004 16:00:00	3.081702231	5.144914836
23/01/2004 17:00:00	2.423595019	4.476049614
23/01/2004 18:00:00	1.594454107	3.558265674
23/01/2004 19:00:00	0.640483419	2.450535028
23/01/2004 20:00:00	-0.392113116	1.211829687
23/01/2004 21:00:00	-1.457131574	-0.098878336
23/01/2004 22:00:00	-2.508368027	-1.422617028
23/01/2004 23:00:00	-3.499618549	-2.700414379
24/01/2004 00:00:00	-4.384679214	-3.873298375
24/01/2004 01:00:00	-5.117346095	-4.882297003
24/01/2004 02:00:00	-5.651415266	-5.668438253
24/01/2004 03:00:00	-5.9406828	-6.172750111
24/01/2004 04:00:00	-5.93894477	-6.336260566
24/01/2004 05:00:00	-5.599997251	-6.099997604
24/01/2004 06:00:00	-4.900474227	-5.431528067
24/01/2004 07:00:00	-3.908359886	-4.404572528
24/01/2004 08:00:00	-2.714475606	-3.119389576
24/01/2004 09:00:00	-1.409642767	-1.676237802
24/01/2004 10:00:00	-0.084682746	-0.175375793
24/01/2004 11:00:00	1.169583077	1.28293786
24/01/2004 12:00:00	2.262333324	2.598444568
24/01/2004 13:00:00	3.102746616	3.670885742
24/01/2004 14:00:00	3.600001574	4.400002792
24/01/2004 15:00:00	3.688367184	4.711741366
24/01/2004 16:00:00	3.402472281	4.636862381
24/01/2004 17:00:00	2.802035263	4.232330152
24/01/2004 18:00:00	1.946774528	3.555108997
24/01/2004 19:00:00	0.896408471	2.662163231
24/01/2004 20:00:00	-0.289344507	1.610457171
24/01/2004 21:00:00	-1.550766011	0.456955131
24/01/2004 22:00:00	-2.828137643	-0.74137857
24/01/2004 23:00:00	-4.061741005	-1.927579619
25/01/2004 00:00:00	-5.191857699	-3.044683697
25/01/2004 01:00:00	-6.15876933	-4.03572649
25/01/2004 02:00:00	-6.902757498	-4.843743681
25/01/2004 03:00:00	-7.364103806	-5.411770954
25/01/2004 04:00:00	-7.483089857	-5.682843992
25/01/2004 05:00:00	-7.199997254	-5.599998481
25/01/2004 06:00:00	-6.481164091	-5.129824705
25/01/2004 07:00:00	-5.39715273	-4.333129815
25/01/2004 08:00:00	-4.044581174	-3.294274793
25/01/2004 09:00:00	-2.520067425	-2.097620622
25/01/2004 10:00:00	-0.920229486	-0.827528284
25/01/2004 11:00:00	0.658314641	0.431641239
25/01/2004 12:00:00	2.118946953	1.595526964
25/01/2004 13:00:00	3.365049449	2.579767909
25/01/2004 14:00:00	4.300004124	3.300003092
25/01/2004 15:00:00	4.851908518	3.693721536
25/01/2004 16:00:00	5.04772069	3.785810845
25/01/2004 17:00:00	4.939113422	3.623007903
25/01/2004 18:00:00	4.577759496	3.252049597
25/01/2004 19:00:00	4.015331694	2.71967281
25/01/2004 20:00:00	3.303502798	2.07261443
25/01/2004 21:00:00	2.49394559	1.35761134
25/01/2004 22:00:00	1.638332851	0.621400427
25/01/2004 23:00:00	0.788337363	-0.089281425
26/01/2004 00:00:00	-0.004368091	-0.727697329
26/01/2004 01:00:00	-0.68811073	-1.247110401
26/01/2004 02:00:00	-1.211217772	-1.600783756
26/01/2004 03:00:00	-1.522016435	-1.741980507
26/01/2004 04:00:00	-1.568833937	-1.623963769
26/01/2004 05:00:00	-1.299997496	-1.199996658
26/01/2004 06:00:00	-0.68722284	-0.445695243
26/01/2004 07:00:00	0.204221858	0.573914102
26/01/2004 08:00:00	1.285680703	1.771452801
26/01/2004 09:00:00	2.468497804	3.059542281
26/01/2004 10:00:00	3.664017269	4.350803967
26/01/2004 11:00:00	4.783583204	5.557859286
26/01/2004 12:00:00	5.738539718	6.593329665
26/01/2004 13:00:00	6.440230917	7.369836528
26/01/2004 14:00:00	6.80000091	7.800001302
26/01/2004 15:00:00	6.754118648	7.820986845
26/01/2004 16:00:00	6.338550751	7.468120065
26/01/2004 17:00:00	5.614187831	6.801268462
26/01/2004 18:00:00	4.641920499	5.880299534
26/01/2004 19:00:00	3.482639363	4.765080781
26/01/2004 20:00:00	2.197235036	3.515479701
26/01/2004 21:00:00	0.846598128	2.191363795
26/01/2004 22:00:00	-0.508380751	0.85260056
26/01/2004 23:00:00	-1.80681099	-0.440942503
27/01/2004 00:00:00	-2.987801978	-1.629397896
27/01/2004 01:00:00	-3.990463105	-2.652898119
27/01/2004 02:00:00	-4.75390376	-3.451575674
27/01/2004 03:00:00	-5.217233333	-3.965563061
27/01/2004 04:00:00	-5.319561212	-4.13499278
27/01/2004 05:00:00	-4.999996788	-3.899997334
27/01/2004 06:00:00	-4.225919003	-3.228271008
27/01/2004 07:00:00	-3.077783041	-2.197753303
27/01/2004 08:00:00	-1.664312648	-0.913944542
27/01/2004 09:00:00	-0.094231571	0.517654952
27/01/2004 10:00:00	1.523736441	1.991544858
27/01/2004 11:00:00	3.080867643	3.402224852
27/01/2004 12:00:00	4.468438286	4.644194613
27/01/2004 13:00:00	5.577724623	5.611953817
27/01/2004 14:00:00	6.300002908	6.200002143
27/01/2004 15:00:00	6.556250311	6.331961173
27/01/2004 16:00:00	6.386245573	6.047938042
27/01/2004 17:00:00	5.859467301	5.417160762
27/01/2004 18:00:00	5.045394101	4.508857342
27/01/2004 19:00:00	4.013504581	3.392255791
27/01/2004 20:00:00	2.833277347	2.13658412
27/01/2004 21:00:00	1.574191006	0.811070338
27/01/2004 22:00:00	0.305724165	-0.515057546
27/01/2004 23:00:00	-0.902644569	-1.77257152
28/01/2004 00:00:00	-1.981436589	-2.892243577
28/01/2004 01:00:00	-2.861173288	-3.804845705
28/01/2004 02:00:00	-3.47237606	-4.441149895
28/01/2004 03:00:00	-3.745566297	-4.731928138
28/01/2004 04:00:00	-3.611265393	-4.607952423
28/01/2004 05:00:00	-2.999994741	-3.999994741
28/01/2004 06:00:00	-1.874826389	-2.870889914
28/01/2004 07:00:00	-0.329032646	-1.311721777
28/01/2004 08:00:00	1.511564698	0.554364164
28/01/2004 09:00:00	3.521143855	2.604222401
28/01/2004 10:00:00	5.573883036	4.714707427
28/01/2004 11:00:00	7.543960454	6.762673734
28/01/2004 12:00:00	9.305554319	8.624975815
28/01/2004 13:00:00	10.73284284	10.17846816
28/01/2004 14:00:00	11.70000424	11.30000527
28/01/2004 15:00:00	12.11486667	11.89869418
28/01/2004 16:00:00	12.01985564	12.01264981
28/01/2004 17:00:00	11.49104539	11.71223844
28/01/2004 18:00:00	10.60451014	11.06782635
28/01/2004 19:00:00	9.43632413	10.14977982
28/01/2004 20:00:00	8.062561588	9.028465139
28/01/2004 21:00:00	6.559296745	7.774248587
28/01/2004 22:00:00	5.002603832	6.457496449
28/01/2004 23:00:00	3.46855708	5.148575007
29/01/2004 00:00:00	2.03323072	3.917850544
29/01/2004 01:00:00	0.772698983	2.835689344
29/01/2004 02:00:00	-0.2369639	1.972457688
29/01/2004 03:00:00	-0.919683698	1.398521861
29/01/2004 04:00:00	-1.199386179	1.184248145
29/01/2004 05:00:00	-0.999997114	1.400002823
29/01/2004 06:00:00	-0.278647031	2.085145482
29/01/2004 07:00:00	0.874716974	3.15501123
29/01/2004 08:00:00	2.336944285	4.493929636
29/01/2004 09:00:00	3.984884283	5.986230268
29/01/2004 10:00:00	5.695386351	7.516242695
29/01/2004 11:00:00	7.345299871	8.968296485
29/01/2004 12:00:00	8.811474227	10.22672121
29/01/2004 13:00:00	9.970758801	11.17584643
29/01/2004 14:00:00	10.70000298	11.70000172
29/01/2004 15:00:00	10.90915556	11.71542534
29/01/2004 16:00:00	10.64056059	11.26598795
29/01/2004 17:00:00	9.969660274	10.42746768
29/01/2004 18:00:00	8.971896822	9.275642687
29/01/2004 19:00:00	7.722712445	7.886291103
29/01/2004 20:00:00	6.297549355	6.335191075
29/01/2004 21:00:00	4.771849762	4.698120746
29/01/2004 22:00:00	3.221055878	3.050858257
29/01/2004 23:00:00	1.720609913	1.469181754
30/01/2004 00:00:00	0.345954079	0.028869377
30/01/2004 01:00:00	-0.827469414	-1.194300728
30/01/2004 02:00:00	-1.724218355	-2.124550421
30/01/2004 03:00:00	-2.268850532	-2.686101557
30/01/2004 04:00:00	-2.385923736	-2.803175993
30/01/2004 05:00:00	-1.999995754	-2.399995588
30/01/2004 06:00:00	-1.069447135	-1.434998809
30/01/2004 07:00:00	0.312053141	-0.003487946
30/01/2004 08:00:00	2.017014634	1.765019414
30/01/2004 09:00:00	3.917946905	3.741005687
30/01/2004 10:00:00	5.887359516	5.794953286
30/01/2004 11:00:00	7.797762027	7.797344626
30/01/2004 12:00:00	9.521663999	9.618662122
30/01/2004 13:00:00	10.93157499	11.12938819
30/01/2004 14:00:00	11.90000457	12.20000523
30/01/2004 15:00:00	12.33233543	12.7341891
30/01/2004 16:00:00	12.26544025	12.76838676
30/01/2004 17:00:00	11.76906357	12.3722373
30/01/2004 18:00:00	10.91294994	11.61537982
30/01/2004 19:00:00	9.766843906	10.56745343
30/01/2004 20:00:00	8.400489998	9.298097216
30/01/2004 21:00:00	6.883632763	7.87695028
30/01/2004 22:00:00	5.286016743	6.373651722
30/01/2004 23:00:00	3.677386478	4.857840639
31/01/2004 00:00:00	2.127486512	3.399156131
31/01/2004 01:00:00	0.706061385	2.067237294
31/01/2004 02:00:00	-0.51714436	0.931723229
31/01/2004 03:00:00	-1.472386182	0.062253033
31/01/2004 04:00:00	-2.089919539	-0.471534195
31/01/2004 05:00:00	-2.299999889	-0.599999357
31/01/2004 06:00:00	-2.060115691	-0.280902677
31/01/2004 07:00:00	-1.43668525	0.418400499
31/01/2004 08:00:00	-0.523358796	1.403156587
31/01/2004 09:00:00	0.586213445	2.578612003
31/01/2004 10:00:00	1.798381244	3.850013163
31/01/2004 11:00:00	3.019494373	5.122606483
31/01/2004 12:00:00	4.155902604	6.30163838
31/01/2004 13:00:00	5.11395571	7.292355269
31/01/2004 14:00:00	5.800003462	8.000003566
31/01/2004 15:00:00	6.143872242	8.353381518
31/01/2004 16:00:00	6.169292996	8.375492804
31/01/2004 17:00:00	5.923472338	8.11289199
31/01/2004 18:00:00	5.453616885	7.612133644
31/01/2004 19:00:00	4.80693325	6.919772331
31/01/2004 20:00:00	4.030628051	6.082362619
31/01/2004 21:00:00	3.171907901	5.146459073
31/01/2004 22:00:00	2.277979416	4.158616261
31/01/2004 23:00:00	1.396049212	3.165388749
01/02/2004 00:00:00	0.573323905	2.213331104
01/02/2004 01:00:00	-0.142989892	1.348997893
01/02/2004 02:00:00	-0.705685562	0.618943681
01/02/2004 03:00:00	-1.06755649	0.069723035
01/02/2004 04:00:00	-1.18139606	-0.252109477
01/02/2004 05:00:00	-0.999997658	-0.29999929
01/02/2004 06:00:00	-0.496466951	-0.045743217
01/02/2004 07:00:00	0.274842923	0.465457898
01/02/2004 08:00:00	1.239267368	1.170052578
01/02/2004 09:00:00	2.322141791	2.004489347
01/02/2004 10:00:00	3.448801597	2.905216728
01/02/2004 11:00:00	4.544582191	3.808683246
01/02/2004 12:00:00	5.53481898	4.651337423
01/02/2004 13:00:00	6.34484737	5.369627783
01/02/2004 14:00:00	6.900002765	5.90000285
01/02/2004 15:00:00	7.1451852	6.194736403
01/02/2004 16:00:00	7.103551612	6.26940194
01/02/2004 17:00:00	6.817822757	6.155397564
01/02/2004 18:00:00	6.330719396	5.884121379
01/02/2004 19:00:00	5.684962285	5.486971485
01/02/2004 20:00:00	4.923272185	4.995345987
01/02/2004 21:00:00	4.088369852	4.440642987
01/02/2004 22:00:00	3.222976046	3.854260587
01/02/2004 23:00:00	2.369811525	3.26759689
02/02/2004 00:00:00	1.571597047	2.712049999
02/02/2004 01:00:00	0.871053372	2.219018017
02/02/2004 02:00:00	0.310901256	1.819899046
02/02/2004 03:00:00	-0.06613854	1.546091188
02/02/2004 04:00:00	-0.21734526	1.428992548
02/02/2004 05:00:00	-0.099998143	1.500001226
02/02/2004 06:00:00	0.309844106	1.776270073
02/02/2004 07:00:00	0.961006517	2.217972122
02/02/2004 08:00:00	1.783535444	2.771035748
02/02/2004 09:00:00	2.707477239	3.381389329
02/02/2004 10:00:00	3.662878259	3.994961241
02/02/2004 11:00:00	4.579784855	4.55767986
02/02/2004 12:00:00	5.388243384	5.015473563
02/02/2004 13:00:00	6.018300198	5.314270726
02/02/2004 14:00:00	6.400001653	5.399999726
02/02/2004 15:00:00	6.482637623	5.234604353
02/02/2004 16:00:00	6.292470442	4.844088697
02/02/2004 17:00:00	5.875005153	4.270471582
02/02/2004 18:00:00	5.275746796	3.555771835
02/02/2004 19:00:00	4.540200412	2.74200828
02/02/2004 20:00:00	3.713871042	1.871199743
02/02/2004 21:00:00	2.842263728	0.985365049
02/02/2004 22:00:00	1.970883511	0.126523024
02/02/2004 23:00:00	1.145235432	-0.663307508
03/02/2004 00:00:00	0.410824531	-1.342107721
03/02/2004 01:00:00	-0.186844149	-1.867858789
03/02/2004 02:00:00	-0.602265568	-2.198541887
03/02/2004 03:00:00	-0.789934685	-2.292138191
03/02/2004 04:00:00	-0.704346458	-2.106628874
03/02/2004 05:00:00	-0.299995846	-1.599995112
03/02/2004 06:00:00	0.446547975	-0.751540039
03/02/2004 07:00:00	1.470420861	0.374147205
03/02/2004 08:00:00	2.684685402	1.691156438
03/02/2004 09:00:00	4.002404188	3.113577478
03/02/2004 10:00:00	5.336639809	4.555500142
03/02/2004 11:00:00	6.600454855	5.931014249
03/02/2004 12:00:00	7.706911915	7.154209617
03/02/2004 13:00:00	8.569073579	8.139176064
03/02/2004 14:00:00	9.100002438	8.800003407
03/02/2004 15:00:00	9.236761995	9.074219928
03/02/2004 16:00:00	9.012417328	8.993105719
03/02/2004 17:00:00	8.484033385	8.611378316
03/02/2004 18:00:00	7.708675113	7.983755255
03/02/2004 19:00:00	6.74340746	7.164954073
03/02/2004 20:00:00	5.645295375	6.209692305
03/02/2004 21:00:00	4.471403806	5.172687488
03/02/2004 22:00:00	3.2787977	4.108657157
03/02/2004 23:00:00	2.124542006	3.072318849
04/02/2004 00:00:00	1.06570167	2.1183901
04/02/2004 01:00:00	0.159341642	1.301588446
04/02/2004 02:00:00	-0.53747313	0.676631423
04/02/2004 03:00:00	-0.9676777	0.298236567
04/02/2004 04:00:00	-1.074207118	0.221121414
04/02/2004 05:00:00	-0.799996437	0.500003501
04/02/2004 06:00:00	-0.113793174	1.164828671
04/02/2004 07:00:00	0.912407578	2.146458189
04/02/2004 08:00:00	2.180799401	3.350982726
04/02/2004 09:00:00	3.593575877	4.684492947
04/02/2004 10:00:00	5.052930589	6.053079523
04/02/2004 11:00:00	6.461057119	7.362833122
04/02/2004 12:00:00	7.720149049	8.519844412
04/02/2004 13:00:00	8.732399963	9.430204062
04/02/2004 14:00:00	9.400003442	10.00000274
04/02/2004 15:00:00	9.651065314	10.16056977
04/02/2004 16:00:00	9.517338068	9.944186829
04/02/2004 17:00:00	9.056485284	9.408373135
04/02/2004 18:00:00	8.32617054	8.610647895
04/02/2004 19:00:00	7.384057413	7.608530321
04/02/2004 20:00:00	6.287809483	6.459539621
04/02/2004 21:00:00	5.095090327	5.221195007
04/02/2004 22:00:00	3.863563524	3.95101569
04/02/2004 23:00:00	2.650892653	2.706520879
05/02/2004 00:00:00	1.514741291	1.545229785
05/02/2004 01:00:00	0.512773017	0.524661618
05/02/2004 02:00:00	-0.297348591	-0.29766441
05/02/2004 03:00:00	-0.857959954	-0.864229091
05/02/2004 04:00:00	-1.111397494	-1.117513212
05/02/2004 05:00:00	-0.999997633	-0.999997565
05/02/2004 06:00:00	-0.491796588	-0.479999263
05/02/2004 07:00:00	0.342372575	0.370821627
05/02/2004 08:00:00	1.405978161	1.454969882
05/02/2004 09:00:00	2.602488473	2.674950283
05/02/2004 10:00:00	3.835371815	3.933267608
05/02/2004 11:00:00	5.008096492	5.132426638
05/02/2004 12:00:00	6.024130808	6.174932151
05/02/2004 13:00:00	6.786943066	6.963288926
05/02/2004 14:00:00	7.200001572	7.400001743
05/02/2004 15:00:00	7.193624427	7.414670282
05/02/2004 16:00:00	6.805526464	7.045271348
05/02/2004 17:00:00	6.100271084	6.356875403
05/02/2004 18:00:00	5.142421687	5.414552913
05/02/2004 19:00:00	3.996541677	4.283374342
05/02/2004 20:00:00	2.727194452	3.028410154
05/02/2004 21:00:00	1.398943415	1.714730813
05/02/2004 22:00:00	0.076351967	0.407406783
05/02/2004 23:00:00	-1.176016491	-0.828491471
06/02/2004 00:00:00	-2.293598558	-1.927893485
06/02/2004 01:00:00	-3.211830834	-2.825728794
06/02/2004 02:00:00	-3.866149916	-3.456926936
06/02/2004 03:00:00	-4.191992403	-3.756417445
06/02/2004 04:00:00	-4.124794896	-3.659129856
06/02/2004 05:00:00	-3.599993991	-3.099993707
06/02/2004 06:00:00	-2.583984849	-2.045697817
06/02/2004 07:00:00	-1.166993989	-0.58996519
06/02/2004 08:00:00	0.52979495	1.141723363
06/02/2004 09:00:00	2.385198329	3.02388703
06/02/2004 10:00:00	4.278032508	4.931045001
06/02/2004 11:00:00	6.087113847	6.737716464
06/02/2004 12:00:00	7.691258707	8.318420608
06/02/2004 13:00:00	8.969283449	9.547676621
06/02/2004 14:00:00	9.800004434	10.30000369
06/02/2004 15:00:00	10.09513371	10.48458059
06/02/2004 16:00:00	9.897962979	10.14922116
06/02/2004 17:00:00	9.284678096	9.37639717
06/02/2004 18:00:00	8.33146491	8.248580425
06/02/2004 19:00:00	7.11450927	6.848242709
06/02/2004 20:00:00	5.709997025	5.257855811
06/02/2004 21:00:00	4.194114026	3.55989152
06/02/2004 22:00:00	2.643046123	1.836821623
06/02/2004 23:00:00	1.132979164	0.171117911
07/02/2004 00:00:00	-0.259900999	-1.354747828
07/02/2004 01:00:00	-1.459408518	-2.658303806
07/02/2004 02:00:00	-2.389357542	-3.657078233
07/02/2004 03:00:00	-2.973562223	-4.268599322
07/02/2004 04:00:00	-3.135836709	-4.410395283
07/02/2004 05:00:00	-2.799995152	-3.999994328
07/02/2004 06:00:00	-1.922922991	-2.991071267
07/02/2004 07:00:00	-0.593787671	-1.481883863
07/02/2004 08:00:00	1.065173647	0.393165244
07/02/2004 09:00:00	2.931723806	2.499673416
07/02/2004 10:00:00	4.883625646	4.703238014
07/02/2004 11:00:00	6.798642009	6.869456399
07/02/2004 12:00:00	8.554535734	8.86392593
07/02/2004 13:00:00	10.02906966	10.55224397
07/02/2004 14:00:00	11.10000664	11.80000788
07/02/2004 15:00:00	11.67678098	12.50737693
07/02/2004 16:00:00	11.79550989	12.7127547
07/02/2004 17:00:00	11.5239805	12.48910504
07/02/2004 18:00:00	10.92997998	11.90939177
07/02/2004 19:00:00	10.08129548	11.04657873
07/02/2004 20:00:00	9.045714142	9.973629754
07/02/2004 21:00:00	7.891023124	8.76350868
07/02/2004 22:00:00	6.685009575	7.48917934
07/02/2004 23:00:00	5.495460648	6.223605568
08/02/2004 00:00:00	4.390163493	5.039751199
08/02/2004 01:00:00	3.436905263	4.010580068
08/02/2004 02:00:00	2.703473108	3.209056009
08/02/2004 03:00:00	2.257654181	2.708142857
08/02/2004 04:00:00	2.167235632	2.580804446
08/02/2004 05:00:00	2.500004613	2.900004611
08/02/2004 06:00:00	3.293263057	3.706325041
08/02/2004 07:00:00	4.462375004	4.910822004
08/02/2004 08:00:00	5.892220763	6.392171202
08/02/2004 09:00:00	7.467680641	8.029048339
08/02/2004 10:00:00	9.073634949	9.700129117
08/02/2004 11:00:00	10.594964	11.28408924
08/02/2004 12:00:00	11.91654809	12.65960441
08/02/2004 13:00:00	12.92326754	13.70535033
08/02/2004 14:00:00	13.50000265	14.3000027
08/02/2004 15:00:00	13.56355403	14.35569339
08/02/2004 16:00:00	13.15840026	13.91837564
08/02/2004 17:00:00	12.36093864	13.06745721
08/02/2004 18:00:00	11.24756648	11.88234585
08/02/2004 19:00:00	9.894681083	10.44244931
08/02/2004 20:00:00	8.378679758	8.827175355
08/02/2004 21:00:00	6.775959806	7.115931737
08/02/2004 22:00:00	5.162918532	5.388126213
08/02/2004 23:00:00	3.61595324	3.723166537
09/02/2004 00:00:00	2.211461235	2.200460466
09/02/2004 01:00:00	1.025839822	0.899415755
09/02/2004 02:00:00	0.135486305	-0.10055984
09/02/2004 03:00:00	-0.383202011	-0.720058563
09/02/2004 04:00:00	-0.453827823	-0.879672659
09/02/2004 05:00:00	6.17553E-06	-0.499994372
09/02/2004 06:00:00	1.019318239	0.463146592
09/02/2004 07:00:00	2.503613968	1.912974197
09/02/2004 08:00:00	4.31702168	3.717476707
09/02/2004 09:00:00	6.323669693	5.744642386
09/02/2004 10:00:00	8.387686327	7.862459498
09/02/2004 11:00:00	10.3731999	9.938916305
09/02/2004 12:00:00	12.14433873	11.84200107
09/02/2004 13:00:00	13.56523113	13.43970206
09/02/2004 14:00:00	14.50000543	14.60000754
09/02/2004 15:00:00	14.8494146	15.22511423
09/02/2004 16:00:00	14.66070653	15.35404929
09/02/2004 17:00:00	14.01775194	15.0600466
09/02/2004 18:00:00	13.00442154	14.41634004
09/02/2004 19:00:00	11.70458603	13.49616351
09/02/2004 20:00:00	10.20211613	12.3727509
09/02/2004 21:00:00	8.580882546	11.11933609
09/02/2004 22:00:00	6.924755988	9.809152971
09/02/2004 23:00:00	5.317607165	8.51543543
10/02/2004 00:00:00	3.843306787	7.311417356
10/02/2004 01:00:00	2.585725564	6.270332637
10/02/2004 02:00:00	1.628734204	5.465415161
10/02/2004 03:00:00	1.056203419	4.969898816
10/02/2004 04:00:00	0.952003917	4.857017491
10/02/2004 05:00:00	1.400006408	5.200005072
10/02/2004 06:00:00	2.446467881	6.039194039
10/02/2004 07:00:00	3.987194288	7.283314594
10/02/2004 08:00:00	5.880379785	8.808197212
10/02/2004 09:00:00	7.984218526	10.48967237
10/02/2004 10:00:00	10.15690467	12.20357053
10/02/2004 11:00:00	12.25663236	13.82572219
10/02/2004 12:00:00	14.14159576	15.23195781
10/02/2004 13:00:00	15.66998902	16.29810786
10/02/2004 14:00:00	16.7000063	16.90000282
10/02/2004 15:00:00	17.12737831	16.94776065
10/02/2004 16:00:00	16.99797812	16.4886457
10/02/2004 17:00:00	16.39521341	15.60420802
10/02/2004 18:00:00	15.40249189	14.37599768
10/02/2004 19:00:00	14.10322123	12.88556474
10/02/2004 20:00:00	12.58080914	11.21445927
10/02/2004 21:00:00	10.91866329	9.444231311
10/02/2004 22:00:00	9.200191393	7.656430941
10/02/2004 23:00:00	7.508801124	5.932608217
11/02/2004 00:00:00	5.927900178	4.354313201
11/02/2004 01:00:00	4.540896247	3.003095954
11/02/2004 02:00:00	3.431197021	1.960506538
11/02/2004 03:00:00	2.682210191	1.308095015
11/02/2004 04:00:00	2.377343447	1.127411446
11/02/2004 05:00:00	2.60000448	1.500005893
11/02/2004 06:00:00	3.397516511	2.471067327
11/02/2004 07:00:00	4.672868656	3.940344157
11/02/2004 08:00:00	6.292967445	5.771225603
11/02/2004 09:00:00	8.12471941	7.827100886
11/02/2004 10:00:00	10.03503108	9.971359224
11/02/2004 11:00:00	11.89080899	12.06738984
11/02/2004 12:00:00	13.55895967	13.97858195
11/02/2004 13:00:00	14.90638965	15.56832477
11/02/2004 14:00:00	15.80000547	16.70000753
11/02/2004 15:00:00	16.14175362	17.27215728
11/02/2004 16:00:00	15.97373686	17.32384874
11/02/2004 17:00:00	15.37309603	16.92929261
11/02/2004 18:00:00	14.41697201	16.1626996
11/02/2004 19:00:00	13.18250566	15.09828039
11/02/2004 20:00:00	11.74683785	13.81024571
11/02/2004 21:00:00	10.18710943	12.37280624
11/02/2004 22:00:00	8.58046129	10.86017269
11/02/2004 23:00:00	7.004034278	9.346555758
12/02/2004 00:00:00	5.534969263	7.906166153
12/02/2004 01:00:00	4.25040711	6.613214573
12/02/2004 02:00:00	3.227488684	5.54191172
12/02/2004 03:00:00	2.543354852	4.766468297
12/02/2004 04:00:00	2.275146478	4.361095004
12/02/2004 05:00:00	2.500004426	4.400002545
12/02/2004 06:00:00	3.261543461	4.926828097
12/02/2004 07:00:00	4.469277523	5.862918016
12/02/2004 08:00:00	5.999196237	7.099046765
12/02/2004 09:00:00	7.727289234	8.525988811
12/02/2004 10:00:00	9.529546142	10.03451862
12/02/2004 11:00:00	11.28195659	11.51541065
12/02/2004 12:00:00	12.8605102	12.85943937
12/02/2004 13:00:00	14.14119661	13.95737925
12/02/2004 14:00:00	15.00000544	14.70000474
12/02/2004 15:00:00	15.34634057	15.00726786
12/02/2004 16:00:00	15.22325923	14.91582761
12/02/2004 17:00:00	14.70723111	14.49151895
12/02/2004 18:00:00	13.87472589	13.80017686
12/02/2004 19:00:00	12.80221326	12.9076363
12/02/2004 20:00:00	11.56616289	11.87973226
12/02/2004 21:00:00	10.24304447	10.78229969
12/02/2004 22:00:00	8.909327686	9.681173569
12/02/2004 23:00:00	7.641482217	8.642188868
13/02/2004 00:00:00	6.515977747	7.731180556
13/02/2004 01:00:00	5.609283958	7.013983604
13/02/2004 02:00:00	4.997870535	6.556432981
13/02/2004 03:00:00	4.758207161	6.424363658
13/02/2004 04:00:00	4.966763517	6.683610606
13/02/2004 05:00:00	5.700009288	7.400008795
13/02/2004 06:00:00	6.997475348	8.607318119
13/02/2004 07:00:00	8.750941376	10.21100167
13/02/2004 08:00:00	10.81525026	12.08444921
13/02/2004 09:00:00	13.04524488	14.1010505
13/02/2004 10:00:00	15.29576812	16.13419531
13/02/2004 11:00:00	17.42166288	18.0572734
13/02/2004 12:00:00	19.27777203	19.74367453
13/02/2004 13:00:00	20.71893846	21.06678848
13/02/2004 14:00:00	21.60000507	21.90000501
13/02/2004 15:00:00	21.81578695	22.15128791
13/02/2004 16:00:00	21.42098378	21.86689338
13/02/2004 17:00:00	20.51026521	21.12764973
13/02/2004 18:00:00	19.17830094	20.01438529
13/02/2004 19:00:00	17.51976064	18.60792837
13/02/2004 20:00:00	15.62931399	16.98910729
13/02/2004 21:00:00	13.60163068	15.23875039
13/02/2004 22:00:00	11.53138038	13.43768597
13/02/2004 23:00:00	9.513232775	11.66674235
14/02/2004 00:00:00	7.641857543	10.00674787
14/02/2004 01:00:00	6.011924365	8.538530841
14/02/2004 02:00:00	4.718102922	7.342919581
14/02/2004 03:00:00	3.855062893	6.500742413
14/02/2004 04:00:00	3.517473958	6.092827658
14/02/2004 05:00:00	3.800005797	6.200003638
14/02/2004 06:00:00	4.755394655	6.866910751
14/02/2004 07:00:00	6.268647704	7.993441746
14/02/2004 08:00:00	8.182841017	9.443303465
14/02/2004 09:00:00	10.34105067	11.08020275
14/02/2004 10:00:00	12.58635273	12.76784645
14/02/2004 11:00:00	14.76182328	14.3699414
14/02/2004 12:00:00	16.71053839	15.75019445
14/02/2004 13:00:00	18.27557413	16.77231243
14/02/2004 14:00:00	19.30000657	17.3000022
14/02/2004 15:00:00	19.6683393	17.23498504
14/02/2004 16:00:00	19.43078128	16.63103576
14/02/2004 17:00:00	18.67896666	15.57994147
14/02/2004 18:00:00	17.50452958	14.1734893
14/02/2004 19:00:00	15.99910419	12.50346636
14/02/2004 20:00:00	14.25432464	10.66165976
14/02/2004 21:00:00	12.36182506	8.73985663
14/02/2004 22:00:00	10.41323961	6.829844083
14/02/2004 23:00:00	8.500202426	5.023409235
15/02/2004 00:00:00	6.714347662	3.412339205
15/02/2004 01:00:00	5.147309461	2.08842111
15/02/2004 02:00:00	3.890721967	1.143442068
15/02/2004 03:00:00	3.036219328	0.669189196
15/02/2004 04:00:00	2.675435688	0.757449611
15/02/2004 05:00:00	2.900005193	1.500010431
15/02/2004 06:00:00	3.763314594	2.946310051
15/02/2004 07:00:00	5.165765412	4.976396791
15/02/2004 08:00:00	6.969513948	7.427972657
15/02/2004 09:00:00	9.036716503	10.13873966
15/02/2004 10:00:00	11.22952938	12.94639979
15/02/2004 11:00:00	13.41010887	15.68865508
15/02/2004 12:00:00	15.44061129	18.20320751
15/02/2004 13:00:00	17.18319294	20.32775911
15/02/2004 14:00:00	18.50001011	21.90001186
15/02/2004 15:00:00	19.28698984	22.79875176
15/02/2004 16:00:00	19.57513823	23.06709595
15/02/2004 17:00:00	19.42923021	22.78924321
15/02/2004 18:00:00	18.91404067	22.04939228
15/02/2004 19:00:00	18.09434451	20.93174195
15/02/2004 20:00:00	17.03491666	19.52049098
15/02/2004 21:00:00	15.800532	17.89983814
15/02/2004 22:00:00	14.45596546	16.15398218
15/02/2004 23:00:00	13.06599194	14.36712189
16/02/2004 00:00:00	11.69538634	12.62345603
16/02/2004 01:00:00	10.40892357	11.00718336
16/02/2004 02:00:00	9.271378536	9.60250265
16/02/2004 03:00:00	8.347526151	8.493612669
16/02/2004 04:00:00	7.702141319	7.764712182
16/02/2004 05:00:00	7.399998946	7.499999956
16/02/2004 06:00:00	7.481162073	7.750753669
16/02/2004 07:00:00	7.886849142	8.436570465
16/02/2004 08:00:00	8.533568162	9.444128307
16/02/2004 09:00:00	9.337827142	10.66010516
16/02/2004 10:00:00	10.21613409	11.97117899
16/02/2004 11:00:00	11.08499702	13.26402775
16/02/2004 12:00:00	11.86092394	14.42532942
16/02/2004 13:00:00	12.46042285	15.34176196
16/02/2004 14:00:00	12.80000177	15.90000333
16/02/2004 15:00:00	12.81888674	16.01673773
16/02/2004 16:00:00	12.5471733	15.72867085
16/02/2004 17:00:00	12.03767366	15.10251284
16/02/2004 18:00:00	11.34320008	14.20497387
16/02/2004 19:00:00	10.51656479	13.10276409
16/02/2004 20:00:00	9.610580022	11.86259367
16/02/2004 21:00:00	8.678058012	10.55117277
16/02/2004 22:00:00	7.771810998	9.235211554
16/02/2004 23:00:00	6.944651216	7.981420176
17/02/2004 00:00:00	6.2493909	6.856508801
17/02/2004 01:00:00	5.738842288	5.927187591
17/02/2004 02:00:00	5.465817615	5.260166708
17/02/2004 03:00:00	5.483129116	4.922156312
17/02/2004 04:00:00	5.843589029	4.979866566
17/02/2004 05:00:00	6.600009588	5.500007631
17/02/2004 06:00:00	7.777163829	6.518427631
17/02/2004 07:00:00	9.287671307	7.947530198
17/02/2004 08:00:00	11.01611403	9.668858751
17/02/2004 09:00:00	12.84707402	11.56395671
17/02/2004 10:00:00	14.66513328	13.5143675
17/02/2004 11:00:00	16.35487384	15.40163454
17/02/2004 12:00:00	17.80087769	17.10730124
17/02/2004 13:00:00	18.88772685	18.51291103
17/02/2004 14:00:00	19.50000334	19.50000734
17/02/2004 15:00:00	19.55522307	19.98153167
17/02/2004 16:00:00	19.1026336	19.99601422
17/02/2004 17:00:00	18.22441444	19.61338142
17/02/2004 18:00:00	17.00274509	18.90355966
17/02/2004 19:00:00	15.51980506	17.93647538
17/02/2004 20:00:00	13.85777383	16.78205499
17/02/2004 21:00:00	12.09883092	15.51022491
17/02/2004 22:00:00	10.32515584	14.19091156
17/02/2004 23:00:00	8.618928071	12.89404135
18/02/2004 00:00:00	7.062327129	11.6895407
18/02/2004 01:00:00	5.737532513	10.64733604
18/02/2004 02:00:00	4.726723726	9.837353769
18/02/2004 03:00:00	4.11208027	9.329520318
18/02/2004 04:00:00	3.975781647	9.193762101
18/02/2004 05:00:00	4.40000736	9.500005536
18/02/2004 06:00:00	5.429622818	10.28651072
18/02/2004 07:00:00	6.960241566	11.46487631
18/02/2004 08:00:00	8.850165304	12.91503654
18/02/2004 09:00:00	10.95769574	14.51692566
18/02/2004 10:00:00	13.14113456	16.15047791
18/02/2004 11:00:00	15.25878349	17.69562752
18/02/2004 12:00:00	17.16894421	19.03230874
18/02/2004 13:00:00	18.72991844	20.04045582
18/02/2004 14:00:00	19.80000787	20.60000299
18/02/2004 15:00:00	20.27476258	20.62421389
18/02/2004 16:00:00	20.19872157	20.15966565
18/02/2004 17:00:00	19.65366996	19.28626279
18/02/2004 18:00:00	18.72139285	18.08390981
18/02/2004 19:00:00	17.48367538	16.63251121
18/02/2004 20:00:00	16.02230264	15.01197151
18/02/2004 21:00:00	14.41905975	13.3021952
18/02/2004 22:00:00	12.75573184	11.58308679
18/02/2004 23:00:00	11.114104	9.934550796
19/02/2004 00:00:00	9.575961353	8.436491714
19/02/2004 01:00:00	8.223089016	7.168814053
19/02/2004 02:00:00	7.1372721	6.211422318
19/02/2004 03:00:00	6.400295718	5.644221016
19/02/2004 04:00:00	6.093944986	5.547114652
19/02/2004 05:00:00	6.300005017	6.000007732
19/02/2004 06:00:00	7.066367591	7.047124427
19/02/2004 07:00:00	8.305355331	8.589971954
19/02/2004 08:00:00	9.895399608	10.49437939
19/02/2004 09:00:00	11.71493179	12.6261758
19/02/2004 10:00:00	13.64238327	14.85119027
19/02/2004 11:00:00	15.55618539	17.03525187
19/02/2004 12:00:00	17.33476955	19.04418968
19/02/2004 13:00:00	18.8565671	20.74383277
19/02/2004 14:00:00	20.00000943	22.00001021
19/02/2004 15:00:00	20.67322288	22.71221412
19/02/2004 16:00:00	20.90311003	22.91458452
19/02/2004 17:00:00	20.74626658	22.67492241
19/02/2004 18:00:00	20.25928825	22.06102877
19/02/2004 19:00:00	19.49877075	21.14070459
19/02/2004 20:00:00	18.52130979	19.98175085
19/02/2004 21:00:00	17.38350108	18.65196853
19/02/2004 22:00:00	16.14194033	17.21915862
19/02/2004 23:00:00	14.85322326	15.75112211
20/02/2004 00:00:00	13.57394556	14.31565998
20/02/2004 01:00:00	12.36070296	12.98057322
20/02/2004 02:00:00	11.27009117	11.8136628
20/02/2004 03:00:00	10.35870589	10.88272972
20/02/2004 04:00:00	9.683142838	10.25557496
20/02/2004 05:00:00	9.299997723	9.999999507
20/02/2004 06:00:00	9.245359803	10.15800383
20/02/2004 07:00:00	9.473295088	10.66838961
20/02/2004 08:00:00	9.917364418	11.44415962
20/02/2004 09:00:00	10.51112864	12.39831664
20/02/2004 10:00:00	11.18814858	13.44386344
20/02/2004 11:00:00	11.88198509	14.4938028
20/02/2004 12:00:00	12.52619901	15.4611375
20/02/2004 13:00:00	13.05435118	16.25887032
20/02/2004 14:00:00	13.40000244	16.80000403
20/02/2004 15:00:00	13.51360123	17.01929999
20/02/2004 16:00:00	13.41314426	16.93855104
20/02/2004 17:00:00	13.13351477	16.60130723
20/02/2004 18:00:00	12.709596	16.05111862
20/02/2004 19:00:00	12.1762712	15.33153526
20/02/2004 20:00:00	11.5684236	14.4861072
20/02/2004 21:00:00	10.92093646	13.55838448
20/02/2004 22:00:00	10.268693	12.59191717
20/02/2004 23:00:00	9.646576476	11.6302553
21/02/2004 00:00:00	9.089470128	10.71694894
21/02/2004 01:00:00	8.632257198	9.895548121
21/02/2004 02:00:00	8.309820927	9.209602907
21/02/2004 03:00:00	8.157044557	8.702663344
21/02/2004 04:00:00	8.208811332	8.418279483
21/02/2004 05:00:00	8.500004492	8.400001375
21/02/2004 06:00:00	9.048290519	8.672865494
21/02/2004 07:00:00	9.802471037	9.187856379
21/02/2004 08:00:00	10.69413201	9.87744617
21/02/2004 09:00:00	11.6548594	10.67410701
21/02/2004 10:00:00	12.61623917	11.51031104
21/02/2004 11:00:00	13.50985728	12.31853041
21/02/2004 12:00:00	14.2672997	13.03123725
21/02/2004 13:00:00	14.82015238	13.58090372
21/02/2004 14:00:00	15.10000129	13.90000194
21/02/2004 15:00:00	15.05759868	13.93904925
21/02/2004 16:00:00	14.72035945	13.72074137
21/02/2004 17:00:00	14.13486358	13.28581806
21/02/2004 18:00:00	13.34769103	12.67501905
21/02/2004 19:00:00	12.40542177	11.92908411
21/02/2004 20:00:00	11.35463576	11.08875299
21/02/2004 21:00:00	10.24191298	10.19476542
21/02/2004 22:00:00	9.113833379	9.287861171
21/02/2004 23:00:00	8.016976933	8.408779983
22/02/2004 00:00:00	6.997923607	7.598261607
22/02/2004 01:00:00	6.103253367	6.897045794
22/02/2004 02:00:00	5.379546179	6.345872295
22/02/2004 03:00:00	4.87338201	5.985480858
22/02/2004 04:00:00	4.631340826	5.856611234
22/02/2004 05:00:00	4.700002593	6.000003173
22/02/2004 06:00:00	5.105802278	6.437377551
22/02/2004 07:00:00	5.794597466	7.114382226
22/02/2004 08:00:00	6.692102049	7.957647413
22/02/2004 09:00:00	7.724029921	8.893803332
22/02/2004 10:00:00	8.816094975	9.849480199
22/02/2004 11:00:00	9.894011103	10.75130823
22/02/2004 12:00:00	10.8834922	11.52591765
22/02/2004 13:00:00	11.71025216	12.09993867
22/02/2004 14:00:00	12.30000486	12.40000151
22/02/2004 15:00:00	12.5974601	12.37320086
22/02/2004 16:00:00	12.62330865	12.04848664
22/02/2004 17:00:00	12.41723595	11.4752719
22/02/2004 18:00:00	12.01892743	10.70296969
22/02/2004 19:00:00	11.46806853	9.780993065
22/02/2004 20:00:00	10.80434466	8.758755074
22/02/2004 21:00:00	10.06744126	7.685668772
22/02/2004 22:00:00	9.297043763	6.61114721
22/02/2004 23:00:00	8.532837597	5.58460344
23/02/2004 00:00:00	7.814508193	4.655450514
23/02/2004 01:00:00	7.181740982	3.873101485
23/02/2004 02:00:00	6.674221392	3.286969404
23/02/2004 03:00:00	6.331634856	2.946467323
23/02/2004 04:00:00	6.193666803	2.901008296
23/02/2004 05:00:00	6.300002663	3.200005372
23/02/2004 06:00:00	6.673319419	3.870313123
23/02/2004 07:00:00	7.268262508	4.848555165
23/02/2004 08:00:00	8.022470044	6.048798122
23/02/2004 09:00:00	8.873580141	7.385108622
23/02/2004 10:00:00	9.759230912	8.771553288
23/02/2004 11:00:00	10.61706047	10.12219875
23/02/2004 12:00:00	11.38470693	11.35111162
23/02/2004 13:00:00	11.99980841	12.37235854
23/02/2004 14:00:00	12.40000302	13.10000612
23/02/2004 15:00:00	12.53999369	13.47083338
23/02/2004 16:00:00	12.44274039	13.51246581
23/02/2004 17:00:00	12.14826677	13.27523978
23/02/2004 18:00:00	11.69659647	12.80949166
23/02/2004 19:00:00	11.12775316	12.16555782
23/02/2004 20:00:00	10.48176048	11.39377462
23/02/2004 21:00:00	9.798642071	10.54447845
23/02/2004 22:00:00	9.118421595	9.668005654
23/02/2004 23:00:00	8.481122699	8.814692615
24/02/2004 00:00:00	7.926769032	8.034875698
24/02/2004 01:00:00	7.495384245	7.378891271
24/02/2004 02:00:00	7.226991988	6.897075705
24/02/2004 03:00:00	7.161615911	6.639765367
24/02/2004 04:00:00	7.339279665	6.657296626
24/02/2004 05:00:00	7.8000069	7.000005851
24/02/2004 06:00:00	8.564220807	7.695700764
24/02/2004 07:00:00	9.573945386	8.682077527
24/02/2004 08:00:00	10.75160549	9.874305171
24/02/2004 09:00:00	12.01962599	11.18755273
24/02/2004 10:00:00	13.30043173	12.53698923
24/02/2004 11:00:00	14.51644757	13.8377837
24/02/2004 12:00:00	15.59009838	15.00510517
24/02/2004 13:00:00	16.443809	15.95412268
24/02/2004 14:00:00	17.0000043	16.60000526
24/02/2004 15:00:00	17.20259427	16.88081836
24/02/2004 16:00:00	17.08142647	16.82621007
24/02/2004 17:00:00	16.68783215	16.48872337
24/02/2004 18:00:00	16.07314257	15.92090121
24/02/2004 19:00:00	15.28868897	15.17528657
24/02/2004 20:00:00	14.38580259	14.30442241
24/02/2004 21:00:00	13.41581468	13.3608517
24/02/2004 22:00:00	12.43005649	12.39711741
24/02/2004 23:00:00	11.47985926	11.46576251
25/02/2004 00:00:00	10.61655425	10.61932996
25/02/2004 01:00:00	9.891472704	9.910362728
25/02/2004 02:00:00	9.355945861	9.391403784
25/02/2004 03:00:00	9.061304971	9.114996097
25/02/2004 04:00:00	9.058881283	9.133682632
25/02/2004 05:00:00	9.400006042	9.500006357
25/02/2004 06:00:00	10.11200502	10.24194135
25/02/2004 07:00:00	11.12618536	11.28918946
25/02/2004 08:00:00	12.34985037	12.54688533
25/02/2004 09:00:00	13.69030335	13.92016361
25/02/2004 10:00:00	15.05484763	15.31415894
25/02/2004 11:00:00	16.3507865	16.63400597
25/02/2004 12:00:00	17.48542328	17.78483933
25/02/2004 13:00:00	18.36606127	18.67179367
25/02/2004 14:00:00	18.90000378	19.20000364
25/02/2004 15:00:00	19.01986696	19.30068904
25/02/2004 16:00:00	18.7595148	19.00940678
25/02/2004 17:00:00	18.17812238	18.38779713
25/02/2004 18:00:00	17.33486479	17.49750037
25/02/2004 19:00:00	16.28891712	16.40015677
25/02/2004 20:00:00	15.09945445	15.15740661
25/02/2004 21:00:00	13.82565186	13.83089016
25/02/2004 22:00:00	12.52668445	12.4822477
25/02/2004 23:00:00	11.2617273	11.1731195
26/02/2004 00:00:00	10.08995549	9.965145835
26/02/2004 01:00:00	9.070544105	8.919966983
26/02/2004 02:00:00	8.26266824	8.099223217
26/02/2004 03:00:00	7.725502975	7.564554813
26/02/2004 04:00:00	7.518223397	7.377602045
26/02/2004 05:00:00	7.700004591	7.600005189
26/02/2004 06:00:00	8.303810058	8.265017782
26/02/2004 07:00:00	9.257760613	9.292350364
26/02/2004 08:00:00	10.46376731	10.57332871
26/02/2004 09:00:00	11.82374119	11.9992786
26/02/2004 10:00:00	13.23959332	13.4615258
26/02/2004 11:00:00	14.61323475	14.8513961
26/02/2004 12:00:00	15.84657653	16.06021527
26/02/2004 13:00:00	16.8415297	16.97930909
26/02/2004 14:00:00	17.50000534	17.50000333
26/02/2004 15:00:00	17.74993033	17.54384579
26/02/2004 16:00:00	17.6232914	17.15326818
26/02/2004 17:00:00	17.17808928	16.40092207
26/02/2004 18:00:00	16.47232472	15.35945909
26/02/2004 19:00:00	15.56399845	14.10153083
26/02/2004 20:00:00	14.51111122	12.69978888
26/02/2004 21:00:00	13.37166378	11.22688486
26/02/2004 22:00:00	12.20365685	9.755470364
26/02/2004 23:00:00	11.0650912	8.358196991
27/02/2004 00:00:00	10.01396756	7.107716344
27/02/2004 01:00:00	9.108286665	6.076680025
27/02/2004 02:00:00	8.406049267	5.337739634
27/02/2004 03:00:00	7.965256108	4.963546773
27/02/2004 04:00:00	7.843907927	5.026753043
27/02/2004 05:00:00	8.10000547	5.600010046
27/02/2004 06:00:00	8.766089065	6.722636224
27/02/2004 07:00:00	9.772860997	8.300622098
27/02/2004 08:00:00	11.02556494	10.20662739
27/02/2004 09:00:00	12.42944456	12.31331181
27/02/2004 10:00:00	13.88974354	14.49333509
27/02/2004 11:00:00	15.31170555	16.61935695
27/02/2004 12:00:00	16.60057426	18.56403709
27/02/2004 13:00:00	17.66159334	20.20003525
27/02/2004 14:00:00	18.40000647	21.40001114
27/02/2004 15:00:00	18.74602727	22.06942984
27/02/2004 16:00:00	18.72974568	22.24497321
27/02/2004 17:00:00	18.4062198	21.99612613
27/02/2004 18:00:00	17.83050773	21.39237348
27/02/2004 19:00:00	17.0576676	20.50320015
27/02/2004 20:00:00	16.14275749	19.39809102
27/02/2004 21:00:00	15.14083552	18.14653098
27/02/2004 22:00:00	14.1069598	16.8180049
27/02/2004 23:00:00	13.09618844	15.48199767
28/02/2004 00:00:00	12.16357954	14.20799418
28/02/2004 01:00:00	11.3641912	13.06547931
28/02/2004 02:00:00	10.75308155	12.12393794
28/02/2004 03:00:00	10.38530869	11.45285495
28/02/2004 04:00:00	10.31593071	11.12171523
28/02/2004 05:00:00	10.60000574	11.20000367
28/02/2004 06:00:00	11.26701266	11.72744579
28/02/2004 07:00:00	12.24411719	12.62473404
28/02/2004 08:00:00	13.43290766	13.78280363
28/02/2004 09:00:00	14.7349724	15.09258981
28/02/2004 10:00:00	16.05189976	16.4450278
28/02/2004 11:00:00	17.28527807	17.73105283
28/02/2004 12:00:00	18.33669567	18.84160012
28/02/2004 13:00:00	19.10774088	19.6676049
28/02/2004 14:00:00	19.50000205	20.1000024
28/02/2004 15:00:00	19.44196919	20.0592432
28/02/2004 16:00:00	18.96973513	19.58383504
28/02/2004 17:00:00	18.14629244	18.74179885
28/02/2004 18:00:00	17.03463369	17.60115559
28/02/2004 19:00:00	15.69775144	16.2299262
28/02/2004 20:00:00	14.19863826	14.69613163
28/02/2004 21:00:00	12.60028671	13.06779282
28/02/2004 22:00:00	10.96568937	11.41293074
28/02/2004 23:00:00	9.35783879	9.799566315
29/02/2004 00:00:00	7.83972755	8.295720504
29/02/2004 01:00:00	6.474348211	6.969414253
29/02/2004 02:00:00	5.324693341	5.888668508
29/02/2004 03:00:00	4.453755504	5.121504217
29/02/2004 04:00:00	3.92452727	4.735942329
29/02/2004 05:00:00	3.800001202	4.800003791
29/02/2004 06:00:00	4.11657829	5.352033611
29/02/2004 07:00:00	4.804297081	6.311677374
29/02/2004 08:00:00	5.766606487	7.568906891
29/02/2004 09:00:00	6.90695542	9.013693975
29/02/2004 10:00:00	8.12879279	10.53601044
29/02/2004 11:00:00	9.335567509	12.02582809
29/02/2004 12:00:00	10.43072849	13.37311874
29/02/2004 13:00:00	11.31772464	14.4678542
29/02/2004 14:00:00	11.90000487	15.20000629
29/02/2004 15:00:00	12.10566677	15.48768019
29/02/2004 16:00:00	11.96139904	15.36151046
29/02/2004 17:00:00	11.51853724	14.88026295
29/02/2004 18:00:00	10.82841692	14.10270353
29/02/2004 19:00:00	9.942373642	13.08759807
29/02/2004 20:00:00	8.911742977	11.89371241
29/02/2004 21:00:00	7.787860481	10.57981244
29/02/2004 22:00:00	6.622061715	9.204663999
29/02/2004 23:00:00	5.465682239	7.827032962
01/03/2004 00:00:00	4.370057615	6.505685188
01/03/2004 01:00:00	3.386523404	5.29938654
01/03/2004 02:00:00	2.566415166	4.266902879
01/03/2004 03:00:00	1.961068463	3.467000069
01/03/2004 04:00:00	1.621818855	2.958443971
01/03/2004 05:00:00	1.600001904	2.800000447
01/03/2004 06:00:00	1.925610241	3.026805725
01/03/2004 07:00:00	2.543267953	3.579480985
01/03/2004 08:00:00	3.376257779	4.375019527
01/03/2004 09:00:00	4.347862458	5.330414649
01/03/2004 10:00:00	5.381364731	6.362659649
01/03/2004 11:00:00	6.400047337	7.388747827
01/03/2004 12:00:00	7.327193015	8.32567248
01/03/2004 13:00:00	8.086084506	9.090426906
01/03/2004 14:00:00	8.600004548	9.600004405
01/03/2004 15:00:00	8.812490073	9.792975952
01/03/2004 16:00:00	8.748091749	9.694220017
01/03/2004 17:00:00	8.451612927	9.350191136
01/03/2004 18:00:00	7.967856955	8.807343847
01/03/2004 19:00:00	7.341627182	8.112132687
01/03/2004 20:00:00	6.617726958	7.311012193
01/03/2004 21:00:00	5.840959633	6.450436903
01/03/2004 22:00:00	5.056128556	5.576861353
01/03/2004 23:00:00	4.308037075	4.736740082
02/03/2004 00:00:00	3.641488541	3.976527625
02/03/2004 01:00:00	3.101286303	3.342678521
02/03/2004 02:00:00	2.732233709	2.881647306
02/03/2004 03:00:00	2.57913411	2.639888519
02/03/2004 04:00:00	2.686790854	2.663856695
02/03/2004 05:00:00	3.100007292	3.000006373
02/03/2004 06:00:00	3.841553535	3.673065003
02/03/2004 07:00:00	4.846070072	4.620854967
02/03/2004 08:00:00	6.026165811	5.759473196
02/03/2004 09:00:00	7.294449663	7.005016619
02/03/2004 10:00:00	8.563530537	8.27358217
02/03/2004 11:00:00	9.746017344	9.481266778
02/03/2004 12:00:00	10.75451899	10.54416737
02/03/2004 13:00:00	11.5016444	11.37838089
02/03/2004 14:00:00	11.90000246	11.90000426
02/03/2004 15:00:00	11.88697413	12.04808057
02/03/2004 16:00:00	11.49902472	11.85343408
02/03/2004 17:00:00	10.79738972	11.36983348
02/03/2004 18:00:00	9.843304601	10.65104744
02/03/2004 19:00:00	8.698004837	9.750844656
02/03/2004 20:00:00	7.422725909	8.722993801
02/03/2004 21:00:00	6.078703294	7.621263559
02/03/2004 22:00:00	4.727172468	6.499422614
02/03/2004 23:00:00	3.429368909	5.411239646
03/03/2004 00:00:00	2.246528095	4.410483339
03/03/2004 01:00:00	1.239885503	3.550922375
03/03/2004 02:00:00	0.47067661	2.886325436
03/03/2004 03:00:00	0.000136894	2.470461205
03/03/2004 04:00:00	-0.110498168	2.357098364
03/03/2004 05:00:00	0.200006901	2.600005594
03/03/2004 06:00:00	0.964560544	3.228684429
03/03/2004 07:00:00	2.102767402	4.175571511
03/03/2004 08:00:00	3.505907243	5.348838188
03/03/2004 09:00:00	5.065259841	6.656655809
03/03/2004 10:00:00	6.672104965	8.007195722
03/03/2004 11:00:00	8.217722387	9.308629275
03/03/2004 12:00:00	9.593391877	10.46912782
03/03/2004 13:00:00	10.69039321	11.39686269
03/03/2004 14:00:00	11.40000615	12.00000526
03/03/2004 15:00:00	11.6433107	12.21177884
03/03/2004 16:00:00	11.46058322	12.06561089
03/03/2004 17:00:00	10.92189798	11.61997889
03/03/2004 18:00:00	10.09732929	10.93336035
03/03/2004 19:00:00	9.056951427	10.06423277
03/03/2004 20:00:00	7.87083868	9.071073649
03/03/2004 21:00:00	6.609065339	8.012360485
03/03/2004 22:00:00	5.341705694	6.946570778
03/03/2004 23:00:00	4.138834034	5.932182028
04/03/2004 00:00:00	3.070524646	5.027671735
04/03/2004 01:00:00	2.206851821	4.291517398
04/03/2004 02:00:00	1.617889847	3.782196517
04/03/2004 03:00:00	1.373713012	3.558186592
04/03/2004 04:00:00	1.544395607	3.677965122
04/03/2004 05:00:00	2.20001192	4.200009607
04/03/2004 06:00:00	3.37800847	5.156117401
04/03/2004 07:00:00	4.985325769	6.471369417
04/03/2004 08:00:00	6.896279088	8.044168492
04/03/2004 09:00:00	8.985183702	9.772917463
04/03/2004 10:00:00	11.12635488	11.55601917
04/03/2004 11:00:00	13.1941079	13.29187644
04/03/2004 12:00:00	15.06275804	14.87889213
04/03/2004 13:00:00	16.60662056	16.21546906
04/03/2004 14:00:00	17.70001075	17.20001008
04/03/2004 15:00:00	18.2501403	17.75710038
04/03/2004 16:00:00	18.29580156	17.91605053
04/03/2004 17:00:00	17.90868072	17.73235142
04/03/2004 18:00:00	17.16046397	17.26149394
04/03/2004 19:00:00	16.12283753	16.55896897
04/03/2004 20:00:00	14.86748758	15.6802674
04/03/2004 21:00:00	13.46610032	14.68088013
04/03/2004 22:00:00	11.99036197	13.61629803
04/03/2004 23:00:00	10.5119587	12.54201199
05/03/2004 00:00:00	9.102576733	11.5135129
05/03/2004 01:00:00	7.833902256	10.58629165
05/03/2004 02:00:00	6.777621472	9.815839133
05/03/2004 03:00:00	6.005420579	9.257646224
05/03/2004 04:00:00	5.588985777	8.967203816
05/03/2004 05:00:00	5.600003264	9.000002795
05/03/2004 06:00:00	6.079619442	9.387120228
05/03/2004 07:00:00	6.946826329	10.06198174
05/03/2004 08:00:00	8.09007855	10.93360104
05/03/2004 09:00:00	9.397830732	11.91099187
05/03/2004 10:00:00	10.7585375	12.90316795
05/03/2004 11:00:00	12.06065348	13.81914299
05/03/2004 12:00:00	13.1926333	14.56793072
05/03/2004 13:00:00	14.04293158	15.05854487
05/03/2004 14:00:00	14.50000295	15.19999916
05/03/2004 15:00:00	14.48222373	14.92698176
05/03/2004 16:00:00	14.02765234	14.27687453
05/03/2004 17:00:00	13.20426649	13.31273176
05/03/2004 18:00:00	12.08004393	12.09760774
05/03/2004 19:00:00	10.72296238	10.69455674
05/03/2004 20:00:00	9.200999583	9.166633059
05/03/2004 21:00:00	7.582133266	7.576890972
05/03/2004 22:00:00	5.934341162	5.988384763
05/03/2004 23:00:00	4.325601005	4.464168716
06/03/2004 00:00:00	2.823890528	3.067297114
06/03/2004 01:00:00	1.497187464	1.860824241
06/03/2004 02:00:00	0.413469544	0.907804379
06/03/2004 03:00:00	-0.359285497	0.271291813
06/03/2004 04:00:00	-0.753099928	0.014340826
06/03/2004 05:00:00	-0.699996014	0.200005701
06/03/2004 06:00:00	-0.160811289	0.862268833
06/03/2004 07:00:00	0.788360267	1.91882971
06/03/2004 08:00:00	2.04261171	3.258318256
06/03/2004 09:00:00	3.497036097	4.769364394
06/03/2004 10:00:00	5.046726484	6.340598047
06/03/2004 11:00:00	6.586775928	7.860649138
06/03/2004 12:00:00	8.012277485	9.218147591
06/03/2004 13:00:00	9.218324213	10.30172333
06/03/2004 14:00:00	10.10000917	11.00000627
06/03/2004 15:00:00	10.57925155	11.23155119
06/03/2004 16:00:00	10.68527087	11.03460739
06/03/2004 17:00:00	10.47411058	10.47734662
06/03/2004 18:00:00	10.0018142	9.62794062
06/03/2004 19:00:00	9.324425186	8.554561144
06/03/2004 20:00:00	8.497987037	7.325379937
06/03/2004 21:00:00	7.578543235	6.008568744
06/03/2004 22:00:00	6.622137263	4.672299312
06/03/2004 23:00:00	5.684812608	3.384743387
07/03/2004 00:00:00	4.822612752	2.214072716
07/03/2004 01:00:00	4.091581181	1.228459045
07/03/2004 02:00:00	3.54776138	0.496074121
07/03/2004 03:00:00	3.247196832	0.085089691
07/03/2004 04:00:00	3.245931023	0.0636775
07/03/2004 05:00:00	3.600007437	0.500009295
07/03/2004 06:00:00	4.341018387	1.432113348
07/03/2004 07:00:00	5.40275546	2.777448919
07/03/2004 08:00:00	6.694561055	4.423334237
07/03/2004 09:00:00	8.125777571	6.257087531
07/03/2004 10:00:00	9.605747405	8.166027029
07/03/2004 11:00:00	11.04381296	10.03747096
07/03/2004 12:00:00	12.34931662	11.75873756
07/03/2004 13:00:00	13.4316008	13.21714504
07/03/2004 14:00:00	14.2000079	14.30001165
07/03/2004 15:00:00	14.58823273	14.92400354
07/03/2004 16:00:00	14.62737586	15.12317382
07/03/2004 17:00:00	14.3728883	14.96092116
07/03/2004 18:00:00	13.88022106	14.5006442
07/03/2004 19:00:00	13.20482514	13.80574159
07/03/2004 20:00:00	12.40215155	12.939612
07/03/2004 21:00:00	11.5276513	11.96565408
07/03/2004 22:00:00	10.63677539	10.94726647
07/03/2004 23:00:00	9.784974839	9.94784784
08/03/2004 00:00:00	9.027700643	9.030796837
08/03/2004 01:00:00	8.420403814	8.259512116
08/03/2004 02:00:00	8.018535358	7.697392331
08/03/2004 03:00:00	7.877546282	7.407836136
08/03/2004 04:00:00	8.052887593	7.454242186
08/03/2004 05:00:00	8.600010299	7.900009135
08/03/2004 06:00:00	9.548433476	8.780628002
08/03/2004 07:00:00	10.82395275	10.01996386
08/03/2004 08:00:00	12.32643393	11.51397645
08/03/2004 09:00:00	13.95574286	13.15862551
08/03/2004 10:00:00	15.61174535	14.84987077
08/03/2004 11:00:00	17.19430724	16.48367196
08/03/2004 12:00:00	18.60329433	17.95598882
08/03/2004 13:00:00	19.73857246	19.1627811
08/03/2004 14:00:00	20.50000745	20.00000851
08/03/2004 15:00:00	20.81500127	20.39134647
08/03/2004 16:00:00	20.7210959	20.37132842
08/03/2004 17:00:00	20.28336718	20.00220122
08/03/2004 18:00:00	19.56689097	19.34621168
08/03/2004 19:00:00	18.63674311	18.46560665
08/03/2004 20:00:00	17.55799945	17.42263295
08/03/2004 21:00:00	16.39573584	16.27953742
08/03/2004 22:00:00	15.21502813	15.09856689
08/03/2004 23:00:00	14.08095216	13.94196819
09/03/2004 00:00:00	13.05858378	12.87198816
09/03/2004 01:00:00	12.21299884	11.95087363
09/03/2004 02:00:00	11.60927319	11.24087143
09/03/2004 03:00:00	11.31248268	10.8042284
09/03/2004 04:00:00	11.38770315	10.70319137
09/03/2004 05:00:00	11.90001046	11.00000718
09/03/2004 06:00:00	12.8837287	11.73011034
09/03/2004 07:00:00	14.25018011	12.82169065
09/03/2004 08:00:00	15.87993777	14.17612783
09/03/2004 09:00:00	17.65357472	15.69480159
09/03/2004 10:00:00	19.45166403	17.27909165
09/03/2004 11:00:00	21.15477876	18.83037773
09/03/2004 12:00:00	22.64349197	20.25003955
09/03/2004 13:00:00	23.79837673	21.43945682
09/03/2004 14:00:00	24.50000608	22.30000926
09/03/2004 15:00:00	24.66192521	22.75900866
09/03/2004 16:00:00	24.32956221	22.84749068
09/03/2004 17:00:00	23.58131454	22.6224209
09/03/2004 18:00:00	22.49557964	22.14076489
09/03/2004 19:00:00	21.15075496	21.4594882
09/03/2004 20:00:00	19.62523796	20.63555641
09/03/2004 21:00:00	17.99742607	19.72593509
09/03/2004 22:00:00	16.34571676	18.7875898
09/03/2004 23:00:00	14.74850747	17.87748611
10/03/2004 00:00:00	13.28419566	17.05258958
10/03/2004 01:00:00	12.03117876	16.36986579
10/03/2004 02:00:00	11.06785423	15.8862803
10/03/2004 03:00:00	10.47261952	15.65879867
10/03/2004 04:00:00	10.32387208	15.74438648
10/03/2004 05:00:00	10.70000936	16.20000929
10/03/2004 06:00:00	11.6432949	17.05444024
10/03/2004 07:00:00	13.05146272	18.22368752
10/03/2004 08:00:00	14.78611598	19.59556926
10/03/2004 09:00:00	16.70885784	21.05790361
10/03/2004 10:00:00	18.68129147	22.49850871
10/03/2004 11:00:00	20.56502003	23.8052027
10/03/2004 12:00:00	22.22164668	24.86580372
10/03/2004 13:00:00	23.51277459	25.56812992
10/03/2004 14:00:00	24.30000693	25.79999942
10/03/2004 15:00:00	24.4816798	25.48151624
10/03/2004 16:00:00	24.10305495	24.66192227
10/03/2004 17:00:00	23.24612394	23.42274255
10/03/2004 18:00:00	21.99287833	21.8455021
10/03/2004 19:00:00	20.42530969	20.01172594
10/03/2004 20:00:00	18.62540958	18.0029391
10/03/2004 21:00:00	16.67516957	15.90066659
10/03/2004 22:00:00	14.65658124	13.78643345
10/03/2004 23:00:00	12.65163613	11.74176469
11/03/2004 00:00:00	10.74232583	9.848185345
11/03/2004 01:00:00	9.010641894	8.187220433
11/03/2004 02:00:00	7.538575889	6.840394977
11/03/2004 03:00:00	6.408119382	5.889234001
11/03/2004 04:00:00	5.701263939	5.41526253
11/03/2004 05:00:00	5.500001126	5.500005587
11/03/2004 06:00:00	5.853030565	6.189106905
11/03/2004 07:00:00	6.675889798	7.384691199
11/03/2004 08:00:00	7.850827278	8.953004969
11/03/2004 09:00:00	9.260091455	10.76029472
11/03/2004 10:00:00	10.78593078	12.67280694
11/03/2004 11:00:00	12.3105937	14.55678813
11/03/2004 12:00:00	13.71632868	16.27848481
11/03/2004 13:00:00	14.88538416	17.70414345
11/03/2004 14:00:00	15.70000858	18.70001057
11/03/2004 15:00:00	16.07201706	19.16604938
11/03/2004 16:00:00	16.03148615	19.13708415
11/03/2004 17:00:00	15.63805652	18.68165298
11/03/2004 18:00:00	14.95136884	17.86829396
11/03/2004 19:00:00	14.03106377	16.76554517
11/03/2004 20:00:00	12.93678198	15.4419447
11/03/2004 21:00:00	11.72816413	13.96603065
11/03/2004 22:00:00	10.46485089	12.4063411
11/03/2004 23:00:00	9.206482932	10.83141415
12/03/2004 00:00:00	8.012700914	9.309787879
12/03/2004 01:00:00	6.943145503	7.910000381
12/03/2004 02:00:00	6.057457366	6.700589745
12/03/2004 03:00:00	5.415277169	5.750094062
12/03/2004 04:00:00	5.076245577	5.12705142
12/03/2004 05:00:00	5.100003257	4.89999991
12/03/2004 06:00:00	5.520840038	5.11047395
12/03/2004 07:00:00	6.271646817	5.691997965
12/03/2004 08:00:00	7.259965854	6.551095053
12/03/2004 09:00:00	8.393339409	7.594288314
12/03/2004 10:00:00	9.579309745	8.728100845
12/03/2004 11:00:00	10.72541912	9.859055746
12/03/2004 12:00:00	11.7392098	10.89367612
12/03/2004 13:00:00	12.52822404	11.73848505
12/03/2004 14:00:00	13.00000411	12.30000565
12/03/2004 15:00:00	13.08744519	12.50933568
12/03/2004 16:00:00	12.82484981	12.39586722
12/03/2004 17:00:00	12.27187119	12.01356488
12/03/2004 18:00:00	11.48816257	11.41639328
12/03/2004 19:00:00	10.53337718	10.65831701
12/03/2004 20:00:00	9.467168255	9.7933007
12/03/2004 21:00:00	8.349189031	8.875308941
12/03/2004 22:00:00	7.239092739	7.958306347
12/03/2004 23:00:00	6.196532613	7.096257525
13/03/2004 00:00:00	5.281161887	6.343127083
13/03/2004 01:00:00	4.552633795	5.752879629
13/03/2004 02:00:00	4.07060157	5.379479771
13/03/2004 03:00:00	3.894718446	5.276892117
13/03/2004 04:00:00	4.084637656	5.499081275
13/03/2004 05:00:00	4.700012435	6.100011853
13/03/2004 06:00:00	5.771103011	7.10695893
13/03/2004 07:00:00	7.210602767	8.440444169
13/03/2004 08:00:00	8.901814669	9.994302054
13/03/2004 09:00:00	10.72804168	11.66236707
13/03/2004 10:00:00	12.57258677	13.33847369
13/03/2004 11:00:00	14.3187529	14.9164564
13/03/2004 12:00:00	15.84984304	16.2901497
13/03/2004 13:00:00	17.04916014	17.35338805
13/03/2004 14:00:00	17.80000719	18.00000594
13/03/2004 15:00:00	18.01795741	18.15376138
13/03/2004 16:00:00	17.74765945	17.85810122
13/03/2004 17:00:00	17.06602936	17.18639317
13/03/2004 18:00:00	16.04998322	16.21200495
13/03/2004 19:00:00	14.77643709	15.00830429
13/03/2004 20:00:00	13.32230702	13.64865891
13/03/2004 21:00:00	11.76450909	12.20643653
13/03/2004 22:00:00	10.17995935	10.75500488
13/03/2004 23:00:00	8.645573861	9.367731661
14/03/2004 00:00:00	7.238268696	8.117984612
14/03/2004 01:00:00	6.034959912	7.07913145
14/03/2004 02:00:00	5.112563573	6.324539896
14/03/2004 03:00:00	4.547995742	5.927577674
14/03/2004 04:00:00	4.418172482	5.961612504
14/03/2004 05:00:00	4.800009854	6.500012108
14/03/2004 06:00:00	5.73646865	7.583018502
14/03/2004 07:00:00	7.134694626	9.118376778
14/03/2004 08:00:00	8.867881291	10.98070928
14/03/2004 09:00:00	10.80922216	13.04463834
14/03/2004 10:00:00	12.83191073	15.1847863
14/03/2004 11:00:00	14.80914052	17.27577551
14/03/2004 12:00:00	16.61410504	19.1922283
14/03/2004 13:00:00	18.1199978	20.80876701
14/03/2004 14:00:00	19.20001231	22.00001398
14/03/2004 15:00:00	19.76077565	22.67289605
14/03/2004 16:00:00	19.8426432	22.86355223
14/03/2004 17:00:00	19.5194009	22.64042312
14/03/2004 18:00:00	18.86483472	22.07194936
14/03/2004 19:00:00	17.9527306	21.22657154
14/03/2004 20:00:00	16.8568745	20.17273029
14/03/2004 21:00:00	15.65105237	18.97886622
14/03/2004 22:00:00	14.40905016	17.71341993
14/03/2004 23:00:00	13.20465382	16.44483205
15/03/2004 00:00:00	12.11164932	15.24154319
15/03/2004 01:00:00	11.2038226	14.17199397
15/03/2004 02:00:00	10.55495961	13.30462499
15/03/2004 03:00:00	10.2388463	12.70787687
15/03/2004 04:00:00	10.32926864	12.45019022
15/03/2004 05:00:00	10.90001257	12.60000566
15/03/2004 06:00:00	11.99135673	13.19725974
15/03/2004 07:00:00	13.50955656	14.16787786
15/03/2004 08:00:00	15.3273632	15.40928396
15/03/2004 09:00:00	17.31752779	16.81890196
15/03/2004 10:00:00	19.35280147	18.29415577
15/03/2004 11:00:00	21.30593541	19.73246932
15/03/2004 12:00:00	23.04968073	21.03126654
15/03/2004 13:00:00	24.45678858	22.08797134
15/03/2004 14:00:00	25.40001011	22.80000764
15/03/2004 15:00:00	25.78645266	23.09224689
15/03/2004 16:00:00	25.66064213	22.99934554
15/03/2004 17:00:00	25.1014575	22.58340509
15/03/2004 18:00:00	24.18777774	21.90652703
15/03/2004 19:00:00	22.99848184	21.03081285
15/03/2004 20:00:00	21.61244878	20.01836403
15/03/2004 21:00:00	20.10855752	18.93128207
15/03/2004 22:00:00	18.56568706	17.83166846
15/03/2004 23:00:00	17.06271638	16.78162468
16/03/2004 00:00:00	15.67852444	15.84325222
16/03/2004 01:00:00	14.49199023	15.07865258
16/03/2004 02:00:00	13.58199274	14.54992724
16/03/2004 03:00:00	13.02741093	14.3191777
16/03/2004 04:00:00	12.90712379	14.44850543
16/03/2004 05:00:00	13.3000103	15.00001194
16/03/2004 06:00:00	14.24771358	16.00423588
16/03/2004 07:00:00	15.64294017	17.36547043
16/03/2004 08:00:00	17.34116416	18.9564488
16/03/2004 09:00:00	19.19785963	20.64990421
16/03/2004 10:00:00	21.06850068	22.31856989
16/03/2004 11:00:00	22.80856138	23.83517907
16/03/2004 12:00:00	24.27351583	25.07246497
16/03/2004 13:00:00	25.31883811	25.9031608
16/03/2004 14:00:00	25.80000231	26.19999981
16/03/2004 15:00:00	25.61291659	25.87270987
16/03/2004 16:00:00	24.81521795	24.97899076
16/03/2004 17:00:00	23.50497375	23.61353353
16/03/2004 18:00:00	21.78025136	21.8710292
16/03/2004 19:00:00	19.73911812	19.84616882
16/03/2004 20:00:00	17.4796414	17.63364343
16/03/2004 21:00:00	15.09988856	15.32814407
16/03/2004 22:00:00	12.69792696	13.02436179
16/03/2004 23:00:00	10.37182395	10.81698761
17/03/2004 00:00:00	8.219646896	8.800712591
17/03/2004 01:00:00	6.339463158	7.07022776
17/03/2004 02:00:00	4.829340095	5.720224161
17/03/2004 03:00:00	3.787345064	4.845392836
17/03/2004 04:00:00	3.311545425	4.540424823
17/03/2004 05:00:00	3.500008538	4.900011164
17/03/2004 06:00:00	4.407632495	5.975953286
17/03/2004 07:00:00	5.916646312	7.648502111
17/03/2004 08:00:00	7.866113737	9.755022917
17/03/2004 09:00:00	10.09509852	12.13288098
17/03/2004 10:00:00	12.4426644	14.61944159
17/03/2004 11:00:00	14.74787513	17.05207002
17/03/2004 12:00:00	16.84979446	19.26813156
17/03/2004 13:00:00	18.58748613	21.10499147
17/03/2004 14:00:00	19.8000139	22.40001504
17/03/2004 15:00:00	20.36681907	23.0311283
17/03/2004 16:00:00	20.32884574	23.03849274
17/03/2004 17:00:00	19.76741182	22.50282684
17/03/2004 18:00:00	18.76383521	21.50484906
17/03/2004 19:00:00	17.39943382	20.12527787
17/03/2004 20:00:00	15.75552555	18.44483174
17/03/2004 21:00:00	13.91342831	16.54422915
17/03/2004 22:00:00	11.95446001	14.50418856
17/03/2004 23:00:00	9.959938543	12.40542844
18/03/2004 00:00:00	8.011181826	10.32866726
18/03/2004 01:00:00	6.189507761	8.354623489
18/03/2004 02:00:00	4.576234254	6.564015603
18/03/2004 03:00:00	3.252679212	5.037562068
18/03/2004 04:00:00	2.300160539	3.855981355
18/03/2004 05:00:00	1.799996143	3.099991933
18/03/2004 06:00:00	1.804185968	2.822648248
18/03/2004 07:00:00	2.24746362	2.966353835
18/03/2004 08:00:00	3.035247492	3.445850796
18/03/2004 09:00:00	4.072955978	4.175881235
18/03/2004 10:00:00	5.266007472	5.071187256
18/03/2004 11:00:00	6.519820366	6.046510961
18/03/2004 12:00:00	7.739813055	7.016594455
18/03/2004 13:00:00	8.831403931	7.896179841
18/03/2004 14:00:00	9.700011389	8.600009222
18/03/2004 15:00:00	10.27272718	9.062087368
18/03/2004 16:00:00	10.56333243	9.293466085
18/03/2004 17:00:00	10.60727956	9.324458033
18/03/2004 18:00:00	10.44002102	9.18537587
18/03/2004 19:00:00	10.09700924	8.906532257
18/03/2004 20:00:00	9.613696654	8.518239851
18/03/2004 21:00:00	9.025535703	8.050811313
18/03/2004 22:00:00	8.36797882	7.5345593
18/03/2004 23:00:00	7.676478443	6.999796473
19/03/2004 00:00:00	6.986487008	6.47683549
19/03/2004 01:00:00	6.33345695	5.99598901
19/03/2004 02:00:00	5.752840705	5.587569692
19/03/2004 03:00:00	5.280090711	5.281890196
19/03/2004 04:00:00	4.950659403	5.109263181
19/03/2004 05:00:00	4.799999218	5.100001305
19/03/2004 06:00:00	4.850889345	5.271975463
19/03/2004 07:00:00	5.0754184	5.593291852
19/03/2004 08:00:00	5.433002953	6.019616084
19/03/2004 09:00:00	5.883059576	6.506613771
19/03/2004 10:00:00	6.38500484	7.009950527
19/03/2004 11:00:00	6.898255317	7.485291963
19/03/2004 12:00:00	7.382227577	7.888303692
19/03/2004 13:00:00	7.796338191	8.174651326
19/03/2004 14:00:00	8.100003732	8.300000478
19/03/2004 15:00:00	8.262358285	8.232131956
19/03/2004 16:00:00	8.291404142	7.98728504
19/03/2004 17:00:00	8.204860183	7.593813051
19/03/2004 18:00:00	8.020445288	7.080069309
19/03/2004 19:00:00	7.755878337	6.474407136
19/03/2004 20:00:00	7.428878211	5.805179852
19/03/2004 21:00:00	7.05716379	5.100740778
19/03/2004 22:00:00	6.658453953	4.389443234
19/03/2004 23:00:00	6.250467582	3.699640543
20/03/2004 00:00:00	5.850923555	3.059686023
20/03/2004 01:00:00	5.477540754	2.497932997
20/03/2004 02:00:00	5.148038058	2.042734784
20/03/2004 03:00:00	4.880134348	1.722444707
20/03/2004 04:00:00	4.691548504	1.565416085
20/03/2004 05:00:00	4.599999406	1.600002239
20/03/2004 06:00:00	4.616393125	1.841781956
20/03/2004 07:00:00	4.724385808	2.25523834
20/03/2004 08:00:00	4.900821448	2.792081187
20/03/2004 09:00:00	5.122544036	3.404020296
20/03/2004 10:00:00	5.366397564	4.042765461
20/03/2004 11:00:00	5.609226026	4.660026481
20/03/2004 12:00:00	5.827873413	5.207513152
20/03/2004 13:00:00	5.999183717	5.636935271
20/03/2004 14:00:00	6.10000093	5.900002634
20/03/2004 15:00:00	6.113596892	5.961597158
20/03/2004 16:00:00	6.048953582	5.839286697
20/03/2004 17:00:00	5.921480209	5.563809952
20/03/2004 18:00:00	5.74658598	5.165905626
20/03/2004 19:00:00	5.539680103	4.676312421
20/03/2004 20:00:00	5.316171784	4.12576904
20/03/2004 21:00:00	5.091470231	3.545014184
20/03/2004 22:00:00	4.880984651	2.964786555
20/03/2004 23:00:00	4.700124252	2.415824857
21/03/2004 00:00:00	4.564298242	1.92886779
21/03/2004 01:00:00	4.488915826	1.534654058
21/03/2004 02:00:00	4.489386213	1.263922362
21/03/2004 03:00:00	4.58111861	1.147411405
21/03/2004 04:00:00	4.779522225	1.215859889
21/03/2004 05:00:00	5.100006264	1.500006516
21/03/2004 06:00:00	5.549035105	2.015725664
21/03/2004 07:00:00	6.097295541	2.719437304
21/03/2004 08:00:00	6.706530405	3.552698524
21/03/2004 09:00:00	7.33848253	4.457066416
21/03/2004 10:00:00	7.954894749	5.374098071
21/03/2004 11:00:00	8.517509894	6.245350578
21/03/2004 12:00:00	8.988070798	7.012381029
21/03/2004 13:00:00	9.328320294	7.616746513
21/03/2004 14:00:00	9.500001215	8.00000412
21/03/2004 15:00:00	9.476521486	8.120163623
21/03/2004 16:00:00	9.277947129	8.001042297
21/03/2004 17:00:00	8.936008123	7.682908495
21/03/2004 18:00:00	8.482434443	7.206030568
21/03/2004 19:00:00	7.948956066	6.610676867
21/03/2004 20:00:00	7.36730297	5.937115745
21/03/2004 21:00:00	6.76920513	5.225615553
21/03/2004 22:00:00	6.186392525	4.516444642
21/03/2004 23:00:00	5.650595129	3.849871365
22/03/2004 00:00:00	5.193542922	3.266164071
22/03/2004 01:00:00	4.846965878	2.805591113
22/03/2004 02:00:00	4.642593976	2.508420844
22/03/2004 03:00:00	4.612157191	2.414921613
22/03/2004 04:00:00	4.787385501	2.565361772
22/03/2004 05:00:00	5.200008883	3.000009674
22/03/2004 06:00:00	5.865389191	3.739591717
22/03/2004 07:00:00	6.733419013	4.726670334
22/03/2004 08:00:00	7.737624424	5.884267926
22/03/2004 09:00:00	8.811531499	7.135406895
22/03/2004 10:00:00	9.888666314	8.403109644
22/03/2004 11:00:00	10.90255494	9.610398574
22/03/2004 12:00:00	11.78672346	10.68029609
22/03/2004 13:00:00	12.47469795	11.53582458
22/03/2004 14:00:00	12.90000448	12.10000647
22/03/2004 15:00:00	13.01514565	12.3174188
22/03/2004 16:00:00	12.84852643	12.21885306
22/03/2004 17:00:00	12.44752646	11.85665323
22/03/2004 18:00:00	11.85952535	11.28316332
22/03/2004 19:00:00	11.13190273	10.55072732
22/03/2004 20:00:00	10.31203823	9.711689233
22/03/2004 21:00:00	9.447311468	8.818393064
22/03/2004 22:00:00	8.585102071	7.923182808
22/03/2004 23:00:00	7.772789665	7.078402465
23/03/2004 00:00:00	7.057753874	6.336396035
23/03/2004 01:00:00	6.487374324	5.749507516
23/03/2004 02:00:00	6.109030639	5.370080909
23/03/2004 03:00:00	5.970102445	5.250460213
23/03/2004 04:00:00	6.117969366	5.442989426
23/03/2004 05:00:00	6.600011027	6.000012549
23/03/2004 06:00:00	7.441117886	6.94924671
23/03/2004 07:00:00	8.576228206	8.219906447
23/03/2004 08:00:00	9.917793317	9.71658188
23/03/2004 09:00:00	11.37826455	11.34386313
23/03/2004 10:00:00	12.87009324	13.00634031
23/03/2004 11:00:00	14.30573072	14.60860354
23/03/2004 12:00:00	15.59762832	16.05524294
23/03/2004 13:00:00	16.65823738	17.25084863
23/03/2004 14:00:00	17.40000921	18.10001073
23/03/2004 15:00:00	17.75829015	18.53218407
23/03/2004 16:00:00	17.76000188	18.57627739
23/03/2004 17:00:00	17.45495879	18.28606167
23/03/2004 18:00:00	16.89297525	17.71530787
23/03/2004 19:00:00	16.12386565	16.91778697
23/03/2004 20:00:00	15.19744438	15.94726994
23/03/2004 21:00:00	14.16352582	14.85752775
23/03/2004 22:00:00	13.07192435	13.70233138
23/03/2004 23:00:00	11.97245436	12.53545178
24/03/2004 00:00:00	10.91493024	11.41065994
24/03/2004 01:00:00	9.949166365	10.38172683
24/03/2004 02:00:00	9.124977122	9.502423422
24/03/2004 03:00:00	8.492176897	8.826520682
24/03/2004 04:00:00	8.100580072	8.407789584
24/03/2004 05:00:00	8.000001032	8.300001101
24/03/2004 06:00:00	8.219663446	8.535396395
[truncated: 6,785 more rows]
