# Supplementary material for: Flood Prediction in Ungauged Basins by Physical-Based TOPKAPI Model
Source: Hindawi journal article supplement (doi:10.1155/2019/4795853), 2019-09-05
Supplement: f1 [file 4795853.f1.zip › 4795853.f1/xxdtemp_2005.csv]

time	57290	57297
01/01/2005 00:00:00	-38.9525613	-30.7286319
01/01/2005 01:00:00	-31.7557568	-25.21735504
01/01/2005 02:00:00	-25.40782546	-20.30996408
01/01/2005 03:00:00	-19.86303992	-15.97534811
01/01/2005 04:00:00	-15.07567284	-12.1823962
01/01/2005 05:00:00	-10.99999686	-8.899997448
01/01/2005 06:00:00	-7.590284645	-6.097040941
01/01/2005 07:00:00	-4.800808838	-3.742415763
01/01/2005 08:00:00	-2.585842091	-1.805011001
01/01/2005 09:00:00	-0.899657057	-0.253715742
01/01/2005 10:00:00	0.303473613	0.942580928
01/01/2005 11:00:00	1.069277268	1.814989923
01/01/2005 12:00:00	1.443481257	2.394622155
01/01/2005 13:00:00	1.471812927	2.712588537
01/01/2005 14:00:00	1.199999629	2.799999984
01/01/2005 15:00:00	0.67376871	2.687967409
01/01/2005 16:00:00	-0.06115248	2.407601724
01/01/2005 17:00:00	-0.959036594	1.990013844
01/01/2005 18:00:00	-1.974156282	1.466314682
01/01/2005 19:00:00	-3.060784196	0.867615152
01/01/2005 20:00:00	-4.173192987	0.225026165
01/01/2005 21:00:00	-5.265655307	-0.430341363
01/01/2005 22:00:00	-6.292443806	-1.067376519
01/01/2005 23:00:00	-7.207831136	-1.654968391
02/01/2005 00:00:00	-7.96608995	-2.162006065
02/01/2005 01:00:00	-8.521492896	-2.557378628
02/01/2005 02:00:00	-8.828312628	-2.809975165
02/01/2005 03:00:00	-8.840821797	-2.888684764
02/01/2005 04:00:00	-8.513293053	-2.762396511
02/01/2005 05:00:00	-7.799999049	-2.399999493
02/01/2005 06:00:00	-6.679251041	-1.785773468
02/01/2005 07:00:00	-5.225514411	-0.965560687
02/01/2005 08:00:00	-3.537293	-0.000593977
02/01/2005 09:00:00	-1.713090645	1.047893834
02/01/2005 10:00:00	0.148588813	2.11866992
02/01/2005 11:00:00	1.949241536	3.150501452
02/01/2005 12:00:00	3.590363685	4.082155604
02/01/2005 13:00:00	4.973451419	4.852399549
02/01/2005 14:00:00	6.0000009	5.400000459
02/01/2005 15:00:00	6.59718806	5.680152661
02/01/2005 16:00:00	6.794907572	5.713758879
02/01/2005 17:00:00	6.648733711	5.538148884
02/01/2005 18:00:00	6.214240752	5.190652445
02/01/2005 19:00:00	5.54700297	4.708599331
02/01/2005 20:00:00	4.702594639	4.129319312
02/01/2005 21:00:00	3.736590034	3.490142159
02/01/2005 22:00:00	2.70456343	2.82839764
02/01/2005 23:00:00	1.662089101	2.181415526
03/01/2005 00:00:00	0.664741323	1.586525586
03/01/2005 01:00:00	-0.231905631	1.08105759
03/01/2005 02:00:00	-0.972277485	0.702341307
03/01/2005 03:00:00	-1.500799965	0.487706508
03/01/2005 04:00:00	-1.761898797	0.474482961
03/01/2005 05:00:00	-1.699999704	0.700000437
03/01/2005 06:00:00	-1.282384116	1.184534582
03/01/2005 07:00:00	-0.567755942	1.880144799
03/01/2005 08:00:00	0.362325375	2.721836491
03/01/2005 09:00:00	1.426300393	3.644615063
03/01/2005 10:00:00	2.542609666	4.583485919
03/01/2005 11:00:00	3.629693752	5.473454464
03/01/2005 12:00:00	4.605993207	6.249526102
03/01/2005 13:00:00	5.389948587	6.846706236
03/01/2005 14:00:00	5.900000448	7.200000272
03/01/2005 15:00:00	6.075619962	7.261854638
03/01/2005 16:00:00	5.940400429	7.054479594
03/01/2005 17:00:00	5.5389656	6.617526287
03/01/2005 18:00:00	4.915939227	5.990645866
03/01/2005 19:00:00	4.11594506	5.213489478
03/01/2005 20:00:00	3.183606851	4.325708273
03/01/2005 21:00:00	2.163548352	3.366953397
03/01/2005 22:00:00	1.100393313	2.376876
03/01/2005 23:00:00	0.038765486	1.395127229
04/01/2005 00:00:00	-0.976711377	0.461358232
04/01/2005 01:00:00	-1.901413526	-0.384779842
04/01/2005 02:00:00	-2.69071721	-1.103635845
04/01/2005 03:00:00	-3.299998676	-1.655558629
04/01/2005 04:00:00	-3.684634174	-2.000897046
04/01/2005 05:00:00	-3.799999952	-2.099999947
04/01/2005 06:00:00	-3.619499438	-1.92944548
04/01/2005 07:00:00	-3.18864447	-1.530728694
04/01/2005 08:00:00	-2.570973913	-0.961573795
04/01/2005 09:00:00	-1.83002663	-0.27970499
04/01/2005 10:00:00	-1.029341486	0.457153515
04/01/2005 11:00:00	-0.232457344	1.191277513
04/01/2005 12:00:00	0.497086931	1.864942799
04/01/2005 13:00:00	1.095752475	2.420425165
04/01/2005 14:00:00	1.500000425	2.800000405
04/01/2005 15:00:00	1.662550597	2.960631097
04/01/2005 16:00:00	1.601157242	2.918026687
04/01/2005 17:00:00	1.349833146	2.702583274
04/01/2005 18:00:00	0.942591095	2.344696959
04/01/2005 19:00:00	0.413443875	1.87476384
04/01/2005 20:00:00	-0.203595727	1.323180016
04/01/2005 21:00:00	-0.874514925	0.720341588
04/01/2005 22:00:00	-1.565300933	0.096644654
04/01/2005 23:00:00	-2.241940963	-0.517514687
05/01/2005 00:00:00	-2.870422232	-1.091740334
05/01/2005 01:00:00	-3.416731951	-1.595636189
05/01/2005 02:00:00	-3.846857334	-1.998806152
05/01/2005 03:00:00	-4.126785596	-2.270854125
05/01/2005 04:00:00	-4.22250395	-2.381384006
05/01/2005 05:00:00	-4.099999609	-2.299999699
05/01/2005 06:00:00	-3.7408081	-2.010412095
05/01/2005 07:00:00	-3.18865789	-1.55275979
05/01/2005 08:00:00	-2.502825611	-0.981288237
05/01/2005 09:00:00	-1.742587895	-0.350242887
05/01/2005 10:00:00	-0.96722137	0.286130807
05/01/2005 11:00:00	-0.236002669	0.873587393
05/01/2005 12:00:00	0.391791579	1.35788142
05/01/2005 13:00:00	0.856884741	1.684767435
05/01/2005 14:00:00	1.100000189	1.799999985
05/01/2005 15:00:00	1.079075802	1.665824612
05/01/2005 16:00:00	0.820907163	1.310450491
05/01/2005 17:00:00	0.369504191	0.778577624
05/01/2005 18:00:00	-0.231123193	0.114906013
05/01/2005 19:00:00	-0.936965069	-0.635864338
05/01/2005 20:00:00	-1.704011518	-1.429033429
05/01/2005 21:00:00	-2.488252618	-2.219901256
05/01/2005 22:00:00	-3.24567845	-2.963767819
05/01/2005 23:00:00	-3.932279094	-3.615933114
06/01/2005 00:00:00	-4.50404463	-4.131697139
06/01/2005 01:00:00	-4.916965137	-4.466359892
06/01/2005 02:00:00	-5.127030696	-4.575221371
06/01/2005 03:00:00	-5.090231386	-4.413581574
06/01/2005 04:00:00	-4.762557287	-3.936740499
06/01/2005 05:00:00	-4.09999848	-3.099998143
06/01/2005 06:00:00	-3.081034148	-1.882662493
06/01/2005 07:00:00	-1.774099407	-0.360072972
06/01/2005 08:00:00	-0.270118237	1.368423266
06/01/2005 09:00:00	1.339985387	3.203479069
06/01/2005 10:00:00	2.965287485	5.045747285
06/01/2005 11:00:00	4.51486408	6.795880761
06/01/2005 12:00:00	5.897791195	8.354532343
06/01/2005 13:00:00	7.023144851	9.622354879
06/01/2005 14:00:00	7.800001071	10.50000122
06/01/2005 15:00:00	8.161612346	10.91452805
06/01/2005 16:00:00	8.137936495	10.89860685
06/01/2005 17:00:00	7.783107538	10.51131266
06/01/2005 18:00:00	7.151259491	9.811720513
06/01/2005 19:00:00	6.296526373	8.858905427
06/01/2005 20:00:00	5.273042201	7.711942438
06/01/2005 21:00:00	4.134940992	6.429906576
06/01/2005 22:00:00	2.936356765	5.071872872
06/01/2005 23:00:00	1.731423537	3.696916356
07/01/2005 00:00:00	0.574275325	2.364112058
07/01/2005 01:00:00	-0.480953851	1.132535008
07/01/2005 02:00:00	-1.380129976	0.061260238
07/01/2005 03:00:00	-2.06911903	-0.790637223
07/01/2005 04:00:00	-2.493786997	-1.364082344
07/01/2005 05:00:00	-2.599999858	-1.600000095
07/01/2005 06:00:00	-2.355580746	-1.462515638
07/01/2005 07:00:00	-1.81618086	-1.008554358
07/01/2005 08:00:00	-1.05940829	-0.318241552
07/01/2005 09:00:00	-0.162871124	0.52829748
07/01/2005 10:00:00	0.795822552	1.45093744
07/01/2005 11:00:00	1.739064648	2.369553028
07/01/2005 12:00:00	2.589247077	3.204018945
07/01/2005 13:00:00	3.26876175	3.874209893
07/01/2005 14:00:00	3.70000058	4.300000571
07/01/2005 15:00:00	3.825740196	4.422043988
07/01/2005 16:00:00	3.670295583	4.264105857
07/01/2005 17:00:00	3.278366192	3.870729939
07/01/2005 18:00:00	2.694651475	3.286459996
07/01/2005 19:00:00	1.963850882	2.555839791
07/01/2005 20:00:00	1.130663864	1.723413086
07/01/2005 21:00:00	0.23978987	0.833723641
07/01/2005 22:00:00	-0.664071647	-0.06868478
07/01/2005 23:00:00	-1.536221237	-0.939268417
08/01/2005 00:00:00	-2.33195945	-1.733483506
08/01/2005 01:00:00	-3.006586835	-2.406786287
08/01/2005 02:00:00	-3.515403941	-2.914632997
08/01/2005 03:00:00	-3.813711317	-3.212479874
08/01/2005 04:00:00	-3.856809514	-3.255783156
08/01/2005 05:00:00	-3.599999079	-2.999999082
08/01/2005 06:00:00	-3.01927011	-2.421449181
08/01/2005 07:00:00	-2.173370348	-1.579915601
08/01/2005 08:00:00	-1.141736812	-0.556045507
08/01/2005 09:00:00	-0.003806518	0.569513935
08/01/2005 10:00:00	1.160983516	1.716115558
08/01/2005 11:00:00	2.273196271	2.803112198
08/01/2005 12:00:00	3.25339473	3.749856688
08/01/2005 13:00:00	4.022141876	4.475701863
08/01/2005 14:00:00	4.50000069	4.900000556
08/01/2005 15:00:00	4.629002703	4.964257201
08/01/2005 16:00:00	4.437053051	4.698582021
08/01/2005 17:00:00	3.973525131	4.155236536
08/01/2005 18:00:00	3.287792335	3.38648227
08/01/2005 19:00:00	2.42922806	2.444580744
08/01/2005 20:00:00	1.447205699	1.381793479
08/01/2005 21:00:00	0.391098648	0.250381997
08/01/2005 22:00:00	-0.689719699	-0.89739218
08/01/2005 23:00:00	-1.745875948	-2.009267531
09/01/2005 00:00:00	-2.727996704	-3.032982533
09/01/2005 01:00:00	-3.586708572	-3.916275666
09/01/2005 02:00:00	-4.272638158	-4.606885408
09/01/2005 03:00:00	-4.736412066	-5.052550236
09/01/2005 04:00:00	-4.928656903	-5.201008629
09/01/2005 05:00:00	-4.799999274	-4.999999066
09/01/2005 06:00:00	-4.322938542	-4.421208455
09/01/2005 07:00:00	-3.55746448	-3.532116746
09/01/2005 08:00:00	-2.585439307	-2.424151977
09/01/2005 09:00:00	-1.488725242	-1.188742186
09/01/2005 10:00:00	-0.349184505	0.082684588
09/01/2005 11:00:00	0.751320686	1.298700307
09/01/2005 12:00:00	1.730928112	2.367876932
09/01/2005 13:00:00	2.507775553	3.198786426
09/01/2005 14:00:00	3.00000079	3.700000749
09/01/2005 15:00:00	3.147915858	3.805282043
09/01/2005 16:00:00	2.98052916	3.549152426
09/01/2005 17:00:00	2.549023025	2.991323827
09/01/2005 18:00:00	1.904579783	2.191508173
09/01/2005 19:00:00	1.098381764	1.209417393
09/01/2005 20:00:00	0.181611299	0.104763415
09/01/2005 21:00:00	-0.794549282	-1.062741834
09/01/2005 22:00:00	-1.778917649	-2.233386424
09/01/2005 23:00:00	-2.720311473	-3.347458429
10/01/2005 00:00:00	-3.567548422	-4.345245921
10/01/2005 01:00:00	-4.269446167	-5.16703697
10/01/2005 02:00:00	-4.774822378	-5.753119649
10/01/2005 03:00:00	-5.032494724	-6.04378203
10/01/2005 04:00:00	-4.991280875	-5.979312185
10/01/2005 05:00:00	-4.599998502	-5.499998185
10/01/2005 06:00:00	-3.831086436	-4.573472984
10/01/2005 07:00:00	-2.751467432	-3.276748208
10/01/2005 08:00:00	-1.451685043	-1.714179945
10/01/2005 09:00:00	-0.022282823	0.009875717
10/01/2005 10:00:00	1.446195675	1.791062693
10/01/2005 11:00:00	2.863206899	3.525024894
10/01/2005 12:00:00	4.138207296	5.107406234
10/01/2005 13:00:00	5.180653312	6.433850626
10/01/2005 14:00:00	5.900001393	7.400001983
10/01/2005 15:00:00	6.22951591	7.928320722
10/01/2005 16:00:00	6.197692171	8.048532425
10/01/2005 17:00:00	5.856833029	7.817178754
10/01/2005 18:00:00	5.259241338	7.290801371
10/01/2005 19:00:00	4.45721995	6.525941937
10/01/2005 20:00:00	3.50307172	5.579142114
10/01/2005 21:00:00	2.449099501	4.506943564
10/01/2005 22:00:00	1.347606147	3.365887949
10/01/2005 23:00:00	0.250894511	2.21251693
11/01/2005 00:00:00	-0.788732553	1.103372169
11/01/2005 01:00:00	-1.718972193	0.094995328
11/01/2005 02:00:00	-2.487521553	-0.756071932
11/01/2005 03:00:00	-3.042077782	-1.393287949
11/01/2005 04:00:00	-3.330338025	-1.760111061
11/01/2005 05:00:00	-3.299999428	-1.799999607
11/01/2005 06:00:00	-2.920624822	-1.479158912
11/01/2005 07:00:00	-2.249239044	-0.854781502
11/01/2005 08:00:00	-1.36473225	-0.006806512
11/01/2005 09:00:00	-0.345994599	0.984826923
11/01/2005 10:00:00	0.728083752	2.040179666
11/01/2005 11:00:00	1.778612644	3.079312582
11/01/2005 12:00:00	2.72670192	4.022286535
11/01/2005 13:00:00	3.493461422	4.789162389
11/01/2005 14:00:00	4.000000992	5.300001009
11/01/2005 15:00:00	4.188104297	5.495550978
11/01/2005 16:00:00	4.082249601	5.399311058
11/01/2005 17:00:00	3.727588642	5.055467377
11/01/2005 18:00:00	3.169273157	4.508206064
11/01/2005 19:00:00	2.452454883	3.801713249
11/01/2005 20:00:00	1.622285559	2.98017506
11/01/2005 21:00:00	0.72391692	2.087777627
11/01/2005 22:00:00	-0.197499294	1.168707079
11/01/2005 23:00:00	-1.096811348	0.267149544
12/01/2005 00:00:00	-1.928867503	-0.572708848
12/01/2005 01:00:00	-2.648516022	-1.306681968
12/01/2005 02:00:00	-3.210605167	-1.890583688
12/01/2005 03:00:00	-3.569983201	-2.280227878
12/01/2005 04:00:00	-3.681498387	-2.431428408
12/01/2005 05:00:00	-3.499998987	-2.299999151
12/01/2005 06:00:00	-3.00059294	-1.861633304
12/01/2005 07:00:00	-2.239426173	-1.17154067
12/01/2005 08:00:00	-1.292903929	-0.304810024
12/01/2005 09:00:00	-0.237431452	0.663469856
12/01/2005 10:00:00	0.850586013	1.658210192
12/01/2005 11:00:00	1.894743223	2.604322208
12/01/2005 12:00:00	2.818634934	3.426717128
12/01/2005 13:00:00	3.545855902	4.050306173
12/01/2005 14:00:00	4.000000883	4.400000568
12/01/2005 15:00:00	4.125557406	4.421595359
12/01/2005 16:00:00	3.950583332	4.144420136
12/01/2005 17:00:00	3.524028914	3.618687934
12/01/2005 18:00:00	2.894844408	2.894611788
12/01/2005 19:00:00	2.111980068	2.022404733
12/01/2005 20:00:00	1.224386147	1.052279804
12/01/2005 21:00:00	0.281012902	0.034450036
12/01/2005 22:00:00	-0.669189415	-0.980871535
12/01/2005 23:00:00	-1.577270548	-1.943471876
13/01/2005 00:00:00	-2.394280243	-2.803137951
13/01/2005 01:00:00	-3.071268246	-3.509656724
13/01/2005 02:00:00	-3.559284303	-4.012815162
13/01/2005 03:00:00	-3.809378159	-4.262400228
13/01/2005 04:00:00	-3.772599559	-4.208198888
13/01/2005 05:00:00	-3.399998249	-3.799998107
13/01/2005 06:00:00	-2.66572736	-3.011849709
13/01/2005 07:00:00	-1.636352689	-1.914864032
13/01/2005 08:00:00	-0.401542981	-0.60441582
13/01/2005 09:00:00	0.949033017	0.824120187
13/01/2005 10:00:00	2.325706559	2.275369249
13/01/2005 11:00:00	3.638808899	3.653956624
13/01/2005 12:00:00	4.798671292	4.86450757
13/01/2005 13:00:00	5.71562499	5.811647347
13/01/2005 14:00:00	6.300001248	6.400001213
13/01/2005 15:00:00	6.486611066	6.560560243
13/01/2005 16:00:00	6.30818348	6.329777757
13/01/2005 17:00:00	5.821926797	5.770472379
13/01/2005 18:00:00	5.085049328	4.945462736
13/01/2005 19:00:00	4.154759382	3.917567453
13/01/2005 20:00:00	3.088265267	2.749605156
13/01/2005 21:00:00	1.942775292	1.504394471
13/01/2005 22:00:00	0.775497767	0.244754023
13/01/2005 23:00:00	-0.356358999	-0.966497561
14/01/2005 00:00:00	-1.395586698	-2.066541656
14/01/2005 01:00:00	-2.284977021	-2.992559636
14/01/2005 02:00:00	-2.967321657	-3.681732875
14/01/2005 03:00:00	-3.3854123	-4.071242748
14/01/2005 04:00:00	-3.482040638	-4.098270629
14/01/2005 05:00:00	-3.199998364	-3.699997892
14/01/2005 06:00:00	-2.50830227	-2.84294507
14/01/2005 07:00:00	-1.480868509	-1.610988155
14/01/2005 08:00:00	-0.217837811	-0.11734171
14/01/2005 09:00:00	1.180649096	1.524779699
14/01/2005 10:00:00	2.614451481	3.20216151
14/01/2005 11:00:00	3.983428616	4.80158916
14/01/2005 12:00:00	5.18743977	6.209848083
14/01/2005 13:00:00	6.126344214	7.313723718
14/01/2005 14:00:00	6.700001219	8.000001499
14/01/2005 15:00:00	6.835328249	8.186075593
14/01/2005 16:00:00	6.567474439	7.911773837
14/01/2005 17:00:00	5.958646564	7.247532171
14/01/2005 18:00:00	5.0710514	6.263786535
14/01/2005 19:00:00	3.966895722	5.030972869
14/01/2005 20:00:00	2.708386307	3.619527112
14/01/2005 21:00:00	1.357729929	2.099885207
14/01/2005 22:00:00	-0.022866636	0.542483093
14/01/2005 23:00:00	-1.371196612	-0.982243291
15/01/2005 00:00:00	-2.625053224	-2.403858002
15/01/2005 01:00:00	-3.722229696	-3.651925103
15/01/2005 02:00:00	-4.600519253	-4.656008651
15/01/2005 03:00:00	-5.197715119	-5.345672708
15/01/2005 04:00:00	-5.451610519	-5.650481332
15/01/2005 05:00:00	-5.299998677	-5.499998583
15/01/2005 06:00:00	-4.708349964	-4.854741332
15/01/2005 07:00:00	-3.752842169	-3.799036379
15/01/2005 08:00:00	-2.537329641	-2.448162679
15/01/2005 09:00:00	-1.165666729	-0.917399189
15/01/2005 10:00:00	0.258292217	0.677975136
15/01/2005 11:00:00	1.630692849	2.22268134
15/01/2005 12:00:00	2.847680816	3.601440468
15/01/2005 13:00:00	3.805401771	4.698973564
15/01/2005 14:00:00	4.400001362	5.400001672
15/01/2005 15:00:00	4.55570746	5.620106849
15/01/2005 16:00:00	4.309075587	5.398313869
15/01/2005 17:00:00	3.724742879	4.804507853
15/01/2005 18:00:00	2.867346471	3.908573919
15/01/2005 19:00:00	1.801523498	2.780397188
15/01/2005 20:00:00	0.591911095	1.48986278
15/01/2005 21:00:00	-0.696853603	0.106855815
15/01/2005 22:00:00	-2.000133461	-1.298738588
15/01/2005 23:00:00	-3.253291344	-2.657035309
16/01/2005 00:00:00	-4.391690116	-3.898149227
16/01/2005 01:00:00	-5.350692644	-4.952195222
16/01/2005 02:00:00	-6.065661791	-5.749288176
16/01/2005 03:00:00	-6.471960422	-6.219542967
16/01/2005 04:00:00	-6.504951403	-6.293074476
16/01/2005 05:00:00	-6.099997599	-5.899997583
16/01/2005 06:00:00	-5.22142955	-5.001931068
16/01/2005 07:00:00	-3.94944721	-3.686507901
16/01/2005 08:00:00	-2.39321756	-2.072864249
16/01/2005 09:00:00	-0.661907583	-0.280136281
16/01/2005 10:00:00	1.13531574	1.572539839
16/01/2005 11:00:00	2.889285425	3.366027941
16/01/2005 12:00:00	4.49083449	4.981191859
16/01/2005 13:00:00	5.830795954	6.298895427
16/01/2005 14:00:00	6.800002834	7.200002477
16/01/2005 15:00:00	7.317788005	7.597166088
16/01/2005 16:00:00	7.417482468	7.530194884
16/01/2005 17:00:00	7.160916435	7.070686011
16/01/2005 18:00:00	6.609920116	6.290236615
16/01/2005 19:00:00	5.826323722	5.260443843
16/01/2005 20:00:00	4.871957463	4.05290484
16/01/2005 21:00:00	3.80865155	2.739216755
16/01/2005 22:00:00	2.698236193	1.390976732
16/01/2005 23:00:00	1.602541604	0.079781918
17/01/2005 00:00:00	0.583397993	-1.12277054
17/01/2005 01:00:00	-0.29736443	-2.145083496
17/01/2005 02:00:00	-0.977915454	-2.915559804
17/01/2005 03:00:00	-1.396424869	-3.362602316
17/01/2005 04:00:00	-1.491062463	-3.414613888
17/01/2005 05:00:00	-1.199998026	-2.999997372
17/01/2005 06:00:00	-0.488394985	-2.078353946
17/01/2005 07:00:00	0.570609952	-0.73407662
17/01/2005 08:00:00	1.876887076	0.917244004
17/01/2005 09:00:00	3.330306674	2.760017326
17/01/2005 10:00:00	4.830739036	4.678652742
17/01/2005 11:00:00	6.278054451	6.557559651
17/01/2005 12:00:00	7.572123207	8.281147453
17/01/2005 13:00:00	8.612815594	9.733825544
17/01/2005 14:00:00	9.300001901	10.80000332
17/01/2005 15:00:00	9.560012307	11.39339096
17/01/2005 16:00:00	9.425015296	11.54490026
17/01/2005 17:00:00	8.953638607	11.31474311
17/01/2005 18:00:00	8.204509982	10.76313141
17/01/2005 19:00:00	7.23625716	9.950277027
17/01/2005 20:00:00	6.107507882	8.93639185
17/01/2005 21:00:00	4.87688989	7.781687762
17/01/2005 22:00:00	3.603030924	6.546376647
17/01/2005 23:00:00	2.344558724	5.290670388
18/01/2005 00:00:00	1.160101031	4.074780871
18/01/2005 01:00:00	0.108285587	2.958919977
18/01/2005 02:00:00	-0.752259869	2.003299591
18/01/2005 03:00:00	-1.362907596	1.268131596
18/01/2005 04:00:00	-1.665029853	0.813627876
18/01/2005 05:00:00	-1.5999989	0.700000316
18/01/2005 06:00:00	-1.134812447	0.963109722
18/01/2005 07:00:00	-0.338968755	1.541413805
18/01/2005 08:00:00	0.692409097	2.349019796
18/01/2005 09:00:00	1.864198026	3.300034929
18/01/2005 10:00:00	3.081274954	4.308566436
18/01/2005 11:00:00	4.2485168	5.28872155
18/01/2005 12:00:00	5.270800482	6.154607506
18/01/2005 13:00:00	6.05300292	6.820331534
18/01/2005 14:00:00	6.500001034	7.200000869
18/01/2005 15:00:00	6.542687824	7.230786303
18/01/2005 16:00:00	6.216019305	6.942111716
18/01/2005 17:00:00	5.580966922	6.38646397
18/01/2005 18:00:00	4.69850212	5.616329926
18/01/2005 19:00:00	3.629596344	4.684196447
18/01/2005 20:00:00	2.435221038	3.642550393
18/01/2005 21:00:00	1.176347646	2.543878628
18/01/2005 22:00:00	-0.086052386	1.440668013
18/01/2005 23:00:00	-1.291007614	0.385405409
19/01/2005 00:00:00	-2.377546593	-0.569422321
19/01/2005 01:00:00	-3.284697879	-1.371328316
19/01/2005 02:00:00	-3.951490027	-1.967825715
19/01/2005 03:00:00	-4.316951593	-2.306427654
19/01/2005 04:00:00	-4.320111132	-2.334647272
19/01/2005 05:00:00	-3.899997199	-1.999997708
19/01/2005 06:00:00	-3.024292478	-1.274548336
19/01/2005 07:00:00	-1.775294691	-0.228592217
19/01/2005 08:00:00	-0.263954951	1.043021988
19/01/2005 09:00:00	1.398775632	2.445445616
19/01/2005 10:00:00	3.101945945	3.883830002
19/01/2005 11:00:00	4.734604875	5.263326485
19/01/2005 12:00:00	6.185801312	6.489086401
19/01/2005 13:00:00	7.344584144	7.466261087
19/01/2005 14:00:00	8.100002257	8.10000188
19/01/2005 15:00:00	8.370829127	8.320913183
19/01/2005 16:00:00	8.194735012	8.161410326
19/01/2005 17:00:00	7.639113977	7.67936104
19/01/2005 18:00:00	6.771360088	6.932633054
19/01/2005 19:00:00	5.658867412	5.979094097
19/01/2005 20:00:00	4.369030013	4.876611898
19/01/2005 21:00:00	2.969241956	3.683054189
19/01/2005 22:00:00	1.526897308	2.456288697
19/01/2005 23:00:00	0.109390135	1.254183153
20/01/2005 00:00:00	-1.215885499	0.134605286
20/01/2005 01:00:00	-2.381535528	-0.844577174
20/01/2005 02:00:00	-3.320165886	-1.625496498
20/01/2005 03:00:00	-3.964382507	-2.150284956
20/01/2005 04:00:00	-4.246791326	-2.361074818
20/01/2005 05:00:00	-4.099998277	-2.199998356
20/01/2005 06:00:00	-3.484394594	-1.633374475
20/01/2005 07:00:00	-2.471511207	-0.724267323
20/01/2005 08:00:00	-1.160663597	0.440072967
20/01/2005 09:00:00	0.348832754	1.772396262
20/01/2005 10:00:00	1.957662366	3.185452432
20/01/2005 11:00:00	3.566509756	4.591991342
20/01/2005 12:00:00	5.076059444	5.90476286
20/01/2005 13:00:00	6.386995949	7.036516855
20/01/2005 14:00:00	7.400003789	7.900003193
20/01/2005 15:00:00	8.039765077	8.429355693
20/01/2005 16:00:00	8.326950988	8.644242802
20/01/2005 17:00:00	8.306229634	8.585716335
20/01/2005 18:00:00	8.022269126	8.294828105
20/01/2005 19:00:00	7.519737578	7.812629926
20/01/2005 20:00:00	6.843303101	7.180173611
20/01/2005 21:00:00	6.037633808	6.438510974
20/01/2005 22:00:00	5.14739781	5.628693829
20/01/2005 23:00:00	4.21726322	4.79177399
21/01/2005 00:00:00	3.29189815	3.96880327
21/01/2005 01:00:00	2.415970712	3.200833482
21/01/2005 02:00:00	1.634149017	2.528916441
21/01/2005 03:00:00	0.991101179	1.99410396
21/01/2005 04:00:00	0.531495309	1.637447853
21/01/2005 05:00:00	0.29999952	1.499999934
21/01/2005 06:00:00	0.324887029	1.607035569
21/01/2005 07:00:00	0.568852399	1.920725229
21/01/2005 08:00:00	0.978195757	2.387463381
21/01/2005 09:00:00	1.499217231	2.953644491
21/01/2005 10:00:00	2.078216951	3.565663026
21/01/2005 11:00:00	2.661495044	4.169913452
21/01/2005 12:00:00	3.195351638	4.712790236
21/01/2005 13:00:00	3.626086862	5.140687846
21/01/2005 14:00:00	3.900000844	5.400000747
21/01/2005 15:00:00	3.977327453	5.451254627
21/01/2005 16:00:00	3.874034734	5.311499249
21/01/2005 17:00:00	3.620024073	5.011915197
21/01/2005 18:00:00	3.245196859	4.58368305
21/01/2005 19:00:00	2.779454479	4.057983392
21/01/2005 20:00:00	2.252698321	3.465996803
21/01/2005 21:00:00	1.694829772	2.838903866
21/01/2005 22:00:00	1.135750222	2.207885162
21/01/2005 23:00:00	0.605361056	1.604121272
22/01/2005 00:00:00	0.133563664	1.058792779
22/01/2005 01:00:00	-0.249740568	0.603080264
22/01/2005 02:00:00	-0.514650251	0.268164308
22/01/2005 03:00:00	-0.631263997	0.085225495
22/01/2005 04:00:00	-0.56968042	0.085444404
22/01/2005 05:00:00	-0.299998131	0.300001618
22/01/2005 06:00:00	0.193383233	0.745645385
22/01/2005 07:00:00	0.868860766	1.38139546
22/01/2005 08:00:00	1.670530958	2.151839687
22/01/2005 09:00:00	2.542490297	3.001565909
22/01/2005 10:00:00	3.428835271	3.87516197
22/01/2005 11:00:00	4.27366237	4.717215713
22/01/2005 12:00:00	5.021068081	5.472314982
22/01/2005 13:00:00	5.615148892	6.08504762
22/01/2005 14:00:00	6.000001293	6.500001471
22/01/2005 15:00:00	6.134640204	6.676398482
22/01/2005 16:00:00	6.037753386	6.631996139
22/01/2005 17:00:00	5.742946592	6.399185599
22/01/2005 18:00:00	5.283825572	6.01035802
22/01/2005 19:00:00	4.693996077	5.497904556
22/01/2005 20:00:00	4.007063859	4.894216365
22/01/2005 21:00:00	3.25663467	4.231684604
22/01/2005 22:00:00	2.47631426	3.542700427
22/01/2005 23:00:00	1.699708381	2.859654993
23/01/2005 00:00:00	0.960422785	2.214939457
23/01/2005 01:00:00	0.292063222	1.640944976
23/01/2005 02:00:00	-0.271764557	1.170062706
23/01/2005 03:00:00	-0.697454799	0.834683804
23/01/2005 04:00:00	-0.951401754	0.667199426
23/01/2005 05:00:00	-0.999999669	0.700000728
23/01/2005 06:00:00	-0.823289445	0.951963448
23/01/2005 07:00:00	-0.45589775	1.387902468
23/01/2005 08:00:00	0.053902512	1.95911766
23/01/2005 09:00:00	0.657838437	2.6169089
23/01/2005 10:00:00	1.307637119	3.312576059
23/01/2005 11:00:00	1.955025655	3.997419012
23/01/2005 12:00:00	2.55173114	4.622737631
23/01/2005 13:00:00	3.049480669	5.13983179
23/01/2005 14:00:00	3.40000134	5.500001363
23/01/2005 15:00:00	3.567090116	5.666766989
23/01/2005 16:00:00	3.562822703	5.652531617
23/01/2005 17:00:00	3.411344303	5.481918584
23/01/2005 18:00:00	3.136800119	5.179551229
23/01/2005 19:00:00	2.763335352	4.77005289
23/01/2005 20:00:00	2.315095207	4.278046904
23/01/2005 21:00:00	1.816224884	3.728156611
23/01/2005 22:00:00	1.290869587	3.145005348
23/01/2005 23:00:00	0.763174517	2.553216453
24/01/2005 00:00:00	0.257284879	1.977413264
24/01/2005 01:00:00	-0.202654126	1.442219119
24/01/2005 02:00:00	-0.592497296	0.972257356
24/01/2005 03:00:00	-0.888099427	0.592151314
24/01/2005 04:00:00	-1.065315318	0.326524331
24/01/2005 05:00:00	-1.099999765	0.199999744
24/01/2005 06:00:00	-0.977727474	0.227895224
24/01/2005 07:00:00	-0.722952162	0.388306362
24/01/2005 08:00:00	-0.369847147	0.650023372
24/01/2005 09:00:00	0.047414252	0.981836471
24/01/2005 10:00:00	0.494658716	1.352535875
24/01/2005 11:00:00	0.937712926	1.7309118
24/01/2005 12:00:00	1.342403566	2.085754461
24/01/2005 13:00:00	1.674557315	2.385854075
24/01/2005 14:00:00	1.900000856	2.600000857
24/01/2005 15:00:00	1.993379203	2.704429516
24/01/2005 16:00:00	1.964610136	2.70515226
24/01/2005 17:00:00	1.832429486	2.615625548
24/01/2005 18:00:00	1.615573086	2.449305844
24/01/2005 19:00:00	1.332776765	2.219649608
24/01/2005 20:00:00	1.002776356	1.940113302
24/01/2005 21:00:00	0.64430769	1.624153388
24/01/2005 22:00:00	0.276106597	1.285226326
24/01/2005 23:00:00	-0.08309109	0.936788579
25/01/2005 00:00:00	-0.414549541	0.592296609
25/01/2005 01:00:00	-0.699532924	0.265206875
25/01/2005 02:00:00	-0.919305408	-0.031024159
25/01/2005 03:00:00	-1.055131162	-0.282940032
25/01/2005 04:00:00	-1.088274355	-0.477084284
25/01/2005 05:00:00	-0.999999154	-0.600000451
25/01/2005 06:00:00	-0.780417207	-0.642922585
25/01/2005 07:00:00	-0.455029491	-0.615846478
25/01/2005 08:00:00	-0.058184171	-0.533458277
25/01/2005 09:00:00	0.375770586	-0.410444135
25/01/2005 10:00:00	0.812486616	-0.2614902
25/01/2005 11:00:00	1.217615752	-0.101282623
25/01/2005 12:00:00	1.556809828	0.055492448
25/01/2005 13:00:00	1.79572068	0.194148861
25/01/2005 14:00:00	1.900000141	0.300000467
25/01/2005 15:00:00	1.844944144	0.361808691
25/01/2005 16:00:00	1.644424375	0.382125027
25/01/2005 17:00:00	1.321956299	0.366948431
25/01/2005 18:00:00	0.901055382	0.322277858
25/01/2005 19:00:00	0.405237088	0.254112263
25/01/2005 20:00:00	-0.141983117	0.168450602
25/01/2005 21:00:00	-0.717089769	0.071291829
25/01/2005 22:00:00	-1.296567401	-0.031365099
25/01/2005 23:00:00	-1.85690055	-0.133521229
26/01/2005 00:00:00	-2.37457375	-0.229177605
26/01/2005 01:00:00	-2.826071535	-0.31233527
26/01/2005 02:00:00	-3.187878441	-0.376995272
26/01/2005 03:00:00	-3.436479002	-0.417158653
26/01/2005 04:00:00	-3.548357754	-0.426826459
26/01/2005 05:00:00	-3.499999231	-0.399999734
26/01/2005 06:00:00	-3.278486147	-0.333661082
26/01/2005 07:00:00	-2.913293208	-0.23671913
26/01/2005 08:00:00	-2.444492944	-0.121063965
26/01/2005 09:00:00	-1.912157881	0.001414327
26/01/2005 10:00:00	-1.356360546	0.118825662
26/01/2005 11:00:00	-0.817173468	0.219279952
26/01/2005 12:00:00	-0.334669173	0.290887113
26/01/2005 13:00:00	0.05107981	0.321757058
26/01/2005 14:00:00	0.300000955	0.299999703
26/01/2005 15:00:00	0.383024826	0.217644103
26/01/2005 16:00:00	0.315093605	0.082395622
26/01/2005 17:00:00	0.12215219	-0.094121371
26/01/2005 18:00:00	-0.169854524	-0.300282504
26/01/2005 19:00:00	-0.534981638	-0.524463409
26/01/2005 20:00:00	-0.947284256	-0.755039713
26/01/2005 21:00:00	-1.380817481	-0.980387047
26/01/2005 22:00:00	-1.809636416	-1.18888104
26/01/2005 23:00:00	-2.207796163	-1.368897321
27/01/2005 00:00:00	-2.549351826	-1.508811521
27/01/2005 01:00:00	-2.808358507	-1.596999268
27/01/2005 02:00:00	-2.95887131	-1.621836192
27/01/2005 03:00:00	-2.974945338	-1.571697922
27/01/2005 04:00:00	-2.830635693	-1.434960089
27/01/2005 05:00:00	-2.499997478	-1.199998321
27/01/2005 06:00:00	-1.970585924	-0.862119433
27/01/2005 07:00:00	-1.283955822	-0.444354496
27/01/2005 08:00:00	-0.49516162	0.023334478
27/01/2005 09:00:00	0.340742236	0.510985476
27/01/2005 10:00:00	1.168701297	0.988636485
27/01/2005 11:00:00	1.933661118	1.426325492
27/01/2005 12:00:00	2.580567252	1.794090484
27/01/2005 13:00:00	3.054365251	2.061969449
27/01/2005 14:00:00	3.300000668	2.200000373
27/01/2005 15:00:00	3.278813997	2.187402276
27/01/2005 16:00:00	3.017724326	2.040117657
27/01/2005 17:00:00	2.560045103	1.783269723
27/01/2005 18:00:00	1.949089776	1.441981679
27/01/2005 19:00:00	1.228171793	1.041376732
27/01/2005 20:00:00	0.440604603	0.606578089
27/01/2005 21:00:00	-0.370298348	0.162708955
27/01/2005 22:00:00	-1.161223611	-0.265107464
27/01/2005 23:00:00	-1.888857737	-0.651747961
28/01/2005 00:00:00	-2.50988728	-0.97208933
28/01/2005 01:00:00	-2.980998791	-1.201008364
28/01/2005 02:00:00	-3.258878822	-1.313381858
28/01/2005 03:00:00	-3.300213925	-1.284086605
28/01/2005 04:00:00	-3.061690652	-1.087999399
28/01/2005 05:00:00	-2.499995556	-0.699997034
28/01/2005 06:00:00	-1.593138861	-0.107951757
28/01/2005 07:00:00	-0.404423939	0.648283309
28/01/2005 08:00:00	0.981522932	1.515860056
28/01/2005 09:00:00	2.480075479	2.441930379
28/01/2005 10:00:00	4.006607426	3.373646168
28/01/2005 11:00:00	5.476492498	4.258159318
28/01/2005 12:00:00	6.80510442	5.042621722
28/01/2005 13:00:00	7.907816916	5.674185272
28/01/2005 14:00:00	8.700003711	6.100001861
28/01/2005 15:00:00	9.119002207	6.281398172
28/01/2005 16:00:00	9.190002909	6.236399008
28/01/2005 17:00:00	8.960159196	5.997203442
28/01/2005 18:00:00	8.476624445	5.596010549
28/01/2005 19:00:00	7.786552034	5.065019403
28/01/2005 20:00:00	6.937095343	4.436429077
28/01/2005 21:00:00	5.975407749	3.742438647
28/01/2005 22:00:00	4.948642631	3.015247185
28/01/2005 23:00:00	3.903953368	2.287053766
29/01/2005 00:00:00	2.888493337	1.590057465
29/01/2005 01:00:00	1.949415917	0.956457354
29/01/2005 02:00:00	1.133874486	0.418452509
29/01/2005 03:00:00	0.489022423	0.008242002
29/01/2005 04:00:00	0.062013107	-0.241975091
29/01/2005 05:00:00	-0.100000086	-0.299999697
29/01/2005 06:00:00	0.031278555	-0.14712993
29/01/2005 07:00:00	0.408715464	0.181348347
29/01/2005 08:00:00	0.966320112	0.636652587
29/01/2005 09:00:00	1.638101966	1.170000242
29/01/2005 10:00:00	2.358070498	1.732608765
29/01/2005 11:00:00	3.060235175	2.275695608
29/01/2005 12:00:00	3.678605467	2.750478223
29/01/2005 13:00:00	4.147190843	3.108174064
29/01/2005 14:00:00	4.400000773	3.300000582
29/01/2005 15:00:00	4.38857821	3.290330738
29/01/2005 16:00:00	4.13459872	3.096158525
29/01/2005 17:00:00	3.677270692	2.747632949
29/01/2005 18:00:00	3.055802515	2.274903016
29/01/2005 19:00:00	2.309402578	1.708117731
29/01/2005 20:00:00	1.47727927	1.077426099
29/01/2005 21:00:00	0.59864098	0.412977126
29/01/2005 22:00:00	-0.287303904	-0.255080184
29/01/2005 23:00:00	-1.141346991	-0.896596824
30/01/2005 00:00:00	-1.924279895	-1.481423789
30/01/2005 01:00:00	-2.596894224	-1.979412074
30/01/2005 02:00:00	-3.119981592	-2.360412673
30/01/2005 03:00:00	-3.454333608	-2.594276582
30/01/2005 04:00:00	-3.560741884	-2.650854794
30/01/2005 05:00:00	-3.39999803	-2.499998304
30/01/2005 06:00:00	-2.950915812	-2.126464889
30/01/2005 07:00:00	-2.264396217	-1.574638299
30/01/2005 08:00:00	-1.409361695	-0.903808497
30/01/2005 09:00:00	-0.454734694	-0.173265442
30/01/2005 10:00:00	0.530562336	0.557700906
30/01/2005 11:00:00	1.477606946	1.229800585
30/01/2005 12:00:00	2.317476688	1.783743636
30/01/2005 13:00:00	2.981249113	2.160240098
30/01/2005 14:00:00	3.400001771	2.300000011
30/01/2005 15:00:00	3.52394985	2.161520156
30/01/2005 16:00:00	3.379857594	1.774442902
30/01/2005 17:00:00	3.01362614	1.186196668
30/01/2005 18:00:00	2.471156623	0.444209873
30/01/2005 19:00:00	1.79835018	-0.404089064
30/01/2005 20:00:00	1.041107948	-1.311271725
30/01/2005 21:00:00	0.245331062	-2.22990969
30/01/2005 22:00:00	-0.543079341	-3.11257454
30/01/2005 23:00:00	-1.278222125	-3.911837856
31/01/2005 00:00:00	-1.914196154	-4.580271219
31/01/2005 01:00:00	-2.40510029	-5.070446211
31/01/2005 02:00:00	-2.705033399	-5.334934412
31/01/2005 03:00:00	-2.768094344	-5.326307403
31/01/2005 04:00:00	-2.548381988	-4.997136765
31/01/2005 05:00:00	-1.999995195	-4.29999408
31/01/2005 06:00:00	-1.099529137	-3.211811737
31/01/2005 07:00:00	0.086437565	-1.806963432
31/01/2005 08:00:00	1.468830873	-0.184182706
31/01/2005 09:00:00	2.958576747	1.557796902
31/01/2005 10:00:00	4.466601151	3.32024185
31/01/2005 11:00:00	5.903830044	5.004418599
31/01/2005 12:00:00	7.181189389	6.511593609
31/01/2005 13:00:00	8.209605147	7.743033339
31/01/2005 14:00:00	8.900003281	8.600004249
31/01/2005 15:00:00	9.1869773	9.009942324
31/01/2005 16:00:00	9.099789016	9.004959556
31/01/2005 17:00:00	8.691366845	8.643336415
31/01/2005 18:00:00	8.014639201	7.983353371
31/01/2005 19:00:00	7.122534496	7.083290894
31/01/2005 20:00:00	6.067981146	6.001429453
31/01/2005 21:00:00	4.903907565	4.796049518
31/01/2005 22:00:00	3.683242166	3.52543156
31/01/2005 23:00:00	2.458913363	2.247856047
01/02/2005 00:00:00	1.283849572	1.02160345
01/02/2005 01:00:00	0.210979205	-0.095045761
01/02/2005 02:00:00	-0.706769322	-1.043811116
01/02/2005 03:00:00	-1.416467597	-1.766412147
01/02/2005 04:00:00	-1.865187204	-2.204568382
01/02/2005 05:00:00	-1.99999973	-2.299999352
01/02/2005 06:00:00	-1.789301828	-2.017854414
01/02/2005 07:00:00	-1.286788681	-1.417000317
01/02/2005 08:00:00	-0.567479673	-0.579732684
01/02/2005 09:00:00	0.293605815	0.411652863
01/02/2005 10:00:00	1.221448402	1.474860703
01/02/2005 11:00:00	2.141028703	2.527595213
01/02/2005 12:00:00	2.977327338	3.487560772
01/02/2005 13:00:00	3.655324925	4.272461758
01/02/2005 14:00:00	4.10000208	4.80000255
01/02/2005 15:00:00	4.256026164	5.009319383
01/02/2005 16:00:00	4.14680988	4.925274169
01/02/2005 17:00:00	3.815451865	4.594159794
01/02/2005 18:00:00	3.305050751	4.062269144
01/02/2005 19:00:00	2.658705176	3.375895105
01/02/2005 20:00:00	1.919513773	2.581330565
01/02/2005 21:00:00	1.130575177	1.724868409
01/02/2005 22:00:00	0.334988024	0.852801524
01/02/2005 23:00:00	-0.424149052	0.011422797
02/02/2005 00:00:00	-1.103737415	-0.752974886
02/02/2005 01:00:00	-1.660678431	-1.394098639
02/02/2005 02:00:00	-2.051873465	-1.865655575
02/02/2005 03:00:00	-2.234223881	-2.121352807
02/02/2005 04:00:00	-2.164631046	-2.11489745
02/02/2005 05:00:00	-1.799996323	-1.799996616
02/02/2005 06:00:00	-1.118167797	-1.152240518
02/02/2005 07:00:00	-0.180778678	-0.23474993
02/02/2005 08:00:00	0.929591986	0.867472193
02/02/2005 09:00:00	2.130365144	2.069422895
02/02/2005 10:00:00	3.338961746	3.286099221
02/02/2005 11:00:00	4.472802741	4.432498216
02/02/2005 12:00:00	5.449309081	5.423616923
02/02/2005 13:00:00	6.185901714	6.174452388
02/02/2005 14:00:00	6.60000159	6.600001655
02/02/2005 15:00:00	6.632479424	6.639189091
02/02/2005 16:00:00	6.318002999	6.326646326
02/02/2005 17:00:00	5.714688873	5.720931301
02/02/2005 18:00:00	4.8806536	4.880601955
02/02/2005 19:00:00	3.874013737	3.864216228
02/02/2005 20:00:00	2.752885839	2.730332061
02/02/2005 21:00:00	1.575386463	1.537507392
02/02/2005 22:00:00	0.399632164	0.344300162
02/02/2005 23:00:00	-0.716260501	-0.790731689
03/02/2005 00:00:00	-1.714174978	-1.809030222
03/02/2005 01:00:00	-2.535994709	-2.652037495
03/02/2005 02:00:00	-3.12360314	-3.261195571
03/02/2005 03:00:00	-3.418883714	-3.577946508
03/02/2005 04:00:00	-3.363719875	-3.543732366
03/02/2005 05:00:00	-2.899995067	-3.099995206
03/02/2005 06:00:00	-1.997368301	-2.215728001
03/02/2005 07:00:00	-0.736598457	-0.970125002
03/02/2005 08:00:00	0.773781214	0.530069812
03/02/2005 09:00:00	2.425237461	2.178112464
03/02/2005 10:00:00	4.109237034	3.867258974
03/02/2005 11:00:00	5.717246681	5.490765365
03/02/2005 12:00:00	7.140733153	6.941887659
03/02/2005 13:00:00	8.271163198	8.113881877
03/02/2005 14:00:00	9.000003565	8.900004042
03/02/2005 15:00:00	9.248132198	9.222132597
03/02/2005 16:00:00	9.05406926	9.116633193
03/02/2005 17:00:00	8.485744829	8.648492658
03/02/2005 18:00:00	7.611088982	7.882697821
03/02/2005 19:00:00	6.498031798	6.884235509
03/02/2005 20:00:00	5.214503354	5.718092552
03/02/2005 21:00:00	3.828433729	4.449255777
03/02/2005 22:00:00	2.407753001	3.142712012
03/02/2005 23:00:00	1.020391247	1.863448086
04/02/2005 00:00:00	-0.265721455	0.676450827
04/02/2005 01:00:00	-1.382655026	-0.353292936
04/02/2005 02:00:00	-2.262479389	-1.160796375
04/02/2005 03:00:00	-2.837264465	-1.681072663
04/02/2005 04:00:00	-3.039080177	-1.849134969
04/02/2005 05:00:00	-2.799996447	-1.599996468
04/02/2005 06:00:00	-2.081165647	-0.896845243
04/02/2005 07:00:00	-0.960067375	0.184433455
04/02/2005 08:00:00	0.456737603	1.53978071
04/02/2005 09:00:00	2.062688525	3.065137601
04/02/2005 10:00:00	3.751224626	4.656445213
04/02/2005 11:00:00	5.415785143	6.209644626
04/02/2005 12:00:00	6.949809312	7.620676924
04/02/2005 13:00:00	8.246736368	8.785483187
04/02/2005 14:00:00	9.20000555	9.600004499
04/02/2005 15:00:00	9.729397742	9.987019962
04/02/2005 16:00:00	9.860058085	9.976658371
04/02/2005 17:00:00	9.643472191	9.625885343
04/02/2005 18:00:00	9.131125675	8.991666494
04/02/2005 19:00:00	8.374504149	8.130967441
04/02/2005 20:00:00	7.425093228	7.100753803
04/02/2005 21:00:00	6.334378524	5.957991195
04/02/2005 22:00:00	5.153845652	4.759645236
04/02/2005 23:00:00	3.934980226	3.562681541
05/02/2005 00:00:00	2.729267858	2.424065729
05/02/2005 01:00:00	1.588194162	1.400763416
05/02/2005 02:00:00	0.563244752	0.549740219
05/02/2005 03:00:00	-0.294094759	-0.072038244
05/02/2005 04:00:00	-0.932338756	-0.407606357
05/02/2005 05:00:00	-1.300001627	-0.399998502
05/02/2005 06:00:00	-1.364339299	-0.015721023
05/02/2005 07:00:00	-1.167572161	0.684834023
05/02/2005 08:00:00	-0.770661296	1.61780368
05/02/2005 09:00:00	-0.234567784	2.699324997
05/02/2005 10:00:00	0.379747294	3.845535018
05/02/2005 11:00:00	1.011322856	4.972570791
05/02/2005 12:00:00	1.599197821	5.99656936
05/02/2005 13:00:00	2.082411108	6.833667773
05/02/2005 14:00:00	2.400001637	7.400003076
05/02/2005 15:00:00	2.505901801	7.632638198
05/02/2005 16:00:00	2.413616535	7.552337686
05/02/2005 17:00:00	2.151543567	7.200791012
05/02/2005 18:00:00	1.748080623	6.61968765
05/02/2005 19:00:00	1.231625434	5.85071707
05/02/2005 20:00:00	0.630575725	4.935568746
05/02/2005 21:00:00	-0.026670775	3.91593215
05/02/2005 22:00:00	-0.711716339	2.833496753
05/02/2005 23:00:00	-1.396163237	1.729952029
06/02/2005 00:00:00	-2.051613744	0.646987449
06/02/2005 01:00:00	-2.649670131	-0.373707514
06/02/2005 02:00:00	-3.161934669	-1.290443388
06/02/2005 03:00:00	-3.560009632	-2.061530701
06/02/2005 04:00:00	-3.815497291	-2.645279981
06/02/2005 05:00:00	-3.899999919	-3.000001754
06/02/2005 06:00:00	-3.796394954	-3.098948561
06/02/2005 07:00:00	-3.53265945	-2.975139594
06/02/2005 08:00:00	-3.148045104	-2.676535361
06/02/2005 09:00:00	-2.681803611	-2.251096372
06/02/2005 10:00:00	-2.173186668	-1.746783137
06/02/2005 11:00:00	-1.661445971	-1.211556163
06/02/2005 12:00:00	-1.185833216	-0.693375961
06/02/2005 13:00:00	-0.785600099	-0.240203039
06/02/2005 14:00:00	-0.499998316	0.100002095
06/02/2005 15:00:00	-0.35860146	0.290321009
06/02/2005 16:00:00	-0.352271616	0.338002555
06/02/2005 17:00:00	-0.462193218	0.261337144
06/02/2005 18:00:00	-0.669550703	0.078615187
06/02/2005 19:00:00	-0.955528505	-0.191872904
06/02/2005 20:00:00	-1.301311061	-0.531836718
06/02/2005 21:00:00	-1.688082806	-0.922985844
06/02/2005 22:00:00	-2.097028175	-1.34702987
06/02/2005 23:00:00	-2.509331604	-1.785678384
07/02/2005 00:00:00	-2.906177527	-2.220640977
07/02/2005 01:00:00	-3.268750381	-2.633627235
07/02/2005 02:00:00	-3.578234601	-3.006346748
07/02/2005 03:00:00	-3.815814623	-3.320509105
07/02/2005 04:00:00	-3.962674881	-3.557823894
07/02/2005 05:00:00	-3.999999812	-3.700000703
07/02/2005 06:00:00	-3.916378304	-3.734948888
07/02/2005 07:00:00	-3.730016357	-3.675376275
07/02/2005 08:00:00	-3.466524071	-3.540190162
07/02/2005 09:00:00	-3.151511547	-3.348297848
07/02/2005 10:00:00	-2.810588886	-3.118606629
07/02/2005 11:00:00	-2.469366186	-2.870023804
07/02/2005 12:00:00	-2.153453549	-2.621456669
07/02/2005 13:00:00	-1.888461075	-2.391812524
07/02/2005 14:00:00	-1.699998864	-2.199998665
07/02/2005 15:00:00	-1.607285299	-2.060679513
07/02/2005 16:00:00	-1.603972501	-1.97154839
07/02/2005 17:00:00	-1.677321182	-1.926055945
07/02/2005 18:00:00	-1.814592054	-1.917652826
07/02/2005 19:00:00	-2.003045827	-1.939789682
07/02/2005 20:00:00	-2.229943213	-1.985917161
07/02/2005 21:00:00	-2.482544924	-2.049485913
07/02/2005 22:00:00	-2.748111671	-2.123946586
07/02/2005 23:00:00	-3.013904164	-2.202749829
08/02/2005 00:00:00	-3.267183116	-2.27934629
08/02/2005 01:00:00	-3.495209238	-2.347186618
08/02/2005 02:00:00	-3.685243242	-2.399721461
08/02/2005 03:00:00	-3.824545838	-2.43040147
08/02/2005 04:00:00	-3.900377737	-2.432677291
08/02/2005 05:00:00	-3.899999652	-2.399999574
08/02/2005 06:00:00	-3.815658457	-2.328490702
08/02/2005 07:00:00	-3.65954519	-2.224959731
08/02/2005 08:00:00	-3.448836809	-2.098887322
08/02/2005 09:00:00	-3.200710272	-1.959754135
08/02/2005 10:00:00	-2.932342538	-1.817040831
08/02/2005 11:00:00	-2.660910564	-1.680228071
08/02/2005 12:00:00	-2.40359131	-1.558796515
08/02/2005 13:00:00	-2.177561732	-1.462226823
08/02/2005 14:00:00	-1.999998788	-1.399999656
08/02/2005 15:00:00	-1.8837733	-1.378948341
08/02/2005 16:00:00	-1.824531956	-1.395317132
08/02/2005 17:00:00	-1.813615519	-1.44270308
08/02/2005 18:00:00	-1.842364752	-1.514703234
08/02/2005 19:00:00	-1.90212042	-1.604914647
08/02/2005 20:00:00	-1.984223284	-1.706934369
08/02/2005 21:00:00	-2.080014109	-1.81435945
08/02/2005 22:00:00	-2.180833657	-1.920786941
08/02/2005 23:00:00	-2.278022691	-2.019813893
09/02/2005 00:00:00	-2.362921976	-2.105037357
09/02/2005 01:00:00	-2.426872273	-2.170054383
09/02/2005 02:00:00	-2.461214347	-2.208462022
09/02/2005 03:00:00	-2.45728896	-2.213857326
09/02/2005 04:00:00	-2.406436876	-2.179837343
09/02/2005 05:00:00	-2.299998858	-2.099999127
09/02/2005 06:00:00	-2.133963351	-1.971694065
09/02/2005 07:00:00	-1.922909064	-1.807290532
09/02/2005 08:00:00	-1.686062155	-1.622911052
09/02/2005 09:00:00	-1.442648783	-1.434678149
09/02/2005 10:00:00	-1.211895107	-1.258714348
09/02/2005 11:00:00	-1.013027286	-1.111142173
09/02/2005 12:00:00	-0.865271477	-1.00808415
09/02/2005 13:00:00	-0.787853839	-0.965662803
09/02/2005 14:00:00	-0.800000532	-1.000000656
09/02/2005 15:00:00	-0.914803136	-1.121712106
09/02/2005 16:00:00	-1.120815543	-1.319379597
09/02/2005 17:00:00	-1.400457377	-1.57607772
09/02/2005 18:00:00	-1.736148261	-1.874881069
09/02/2005 19:00:00	-2.110307818	-2.198864237
09/02/2005 20:00:00	-2.505355672	-2.531101815
09/02/2005 21:00:00	-2.903711446	-2.854668397
09/02/2005 22:00:00	-3.287794764	-3.152638575
09/02/2005 23:00:00	-3.64002525	-3.408086942
10/02/2005 00:00:00	-3.942822526	-3.604088092
10/02/2005 01:00:00	-4.178606217	-3.723716616
10/02/2005 02:00:00	-4.329795945	-3.750047107
10/02/2005 03:00:00	-4.378811335	-3.666154159
10/02/2005 04:00:00	-4.308072009	-3.455112363
10/02/2005 05:00:00	-4.099997592	-3.099996313
10/02/2005 06:00:00	-3.745997639	-2.593719069
10/02/2005 07:00:00	-3.273440515	-1.968546558
10/02/2005 08:00:00	-2.718684058	-1.266582674
10/02/2005 09:00:00	-2.118086106	-0.529931308
10/02/2005 10:00:00	-1.508004496	0.199303648
10/02/2005 11:00:00	-0.924797068	0.8790183
10/02/2005 12:00:00	-0.404821657	1.467108758
10/02/2005 13:00:00	0.015563896	1.921471127
10/02/2005 14:00:00	0.300001756	2.200001517
10/02/2005 15:00:00	0.42187372	2.272197062
10/02/2005 16:00:00	0.393519133	2.153957814
10/02/2005 17:00:00	0.237016472	1.872784252
10/02/2005 18:00:00	-0.025555785	1.456176858
10/02/2005 19:00:00	-0.372119158	0.931636112
10/02/2005 20:00:00	-0.780595169	0.326662494
10/02/2005 21:00:00	-1.228905342	-0.331243515
10/02/2005 22:00:00	-1.694971196	-1.014581434
10/02/2005 23:00:00	-2.156714254	-1.695850783
11/02/2005 00:00:00	-2.592056037	-2.347551081
11/02/2005 01:00:00	-2.978918068	-2.942181847
11/02/2005 02:00:00	-3.295221868	-3.452242602
11/02/2005 03:00:00	-3.518888958	-3.850232864
11/02/2005 04:00:00	-3.627840861	-4.108652153
11/02/2005 05:00:00	-3.599999097	-4.199999988
11/02/2005 06:00:00	-3.422680798	-4.107521903
11/02/2005 07:00:00	-3.120784545	-3.857446362
11/02/2005 08:00:00	-2.728604036	-3.48674728
11/02/2005 09:00:00	-2.280432969	-3.032398575
11/02/2005 10:00:00	-1.810565044	-2.531374162
11/02/2005 11:00:00	-1.353293959	-2.020647958
11/02/2005 12:00:00	-0.942913412	-1.537193878
11/02/2005 13:00:00	-0.613717103	-1.11798584
11/02/2005 14:00:00	-0.39999873	-0.79999776
11/02/2005 15:00:00	-0.326786196	-0.611219973
11/02/2005 16:00:00	-0.382045193	-0.543709446
11/02/2005 17:00:00	-0.54447611	-0.580540038
11/02/2005 18:00:00	-0.792779332	-0.704785608
11/02/2005 19:00:00	-1.105655245	-0.899520016
11/02/2005 20:00:00	-1.461804235	-1.147817121
11/02/2005 21:00:00	-1.83992669	-1.432750782
11/02/2005 22:00:00	-2.218722994	-1.737394859
11/02/2005 23:00:00	-2.576893536	-2.044823212
12/02/2005 00:00:00	-2.8931387	-2.338109699
12/02/2005 01:00:00	-3.146158873	-2.60032818
12/02/2005 02:00:00	-3.314654441	-2.814552514
12/02/2005 03:00:00	-3.377325791	-2.963856561
12/02/2005 04:00:00	-3.312873309	-3.03131418
12/02/2005 05:00:00	-3.099997381	-2.999999231
12/02/2005 06:00:00	-2.727562386	-2.859733898
12/02/2005 07:00:00	-2.225087594	-2.627332948
12/02/2005 08:00:00	-1.632255723	-2.326359112
12/02/2005 09:00:00	-0.988749491	-1.980375122
12/02/2005 10:00:00	-0.334251617	-1.612943708
12/02/2005 11:00:00	0.29155518	-1.247627601
12/02/2005 12:00:00	0.848988182	-0.907989535
12/02/2005 13:00:00	1.29836467	-0.617592238
12/02/2005 14:00:00	1.600001926	-0.399998444
12/02/2005 15:00:00	1.724851096	-0.272816609
12/02/2005 16:00:00	1.686397649	-0.229838735
12/02/2005 17:00:00	1.508760347	-0.258902872
12/02/2005 18:00:00	1.216057949	-0.347847068
12/02/2005 19:00:00	0.832409219	-0.484509372
12/02/2005 20:00:00	0.381932916	-0.656727833
12/02/2005 21:00:00	-0.111252198	-0.852340501
12/02/2005 22:00:00	-0.623027361	-1.059185423
12/02/2005 23:00:00	-1.129273813	-1.265100649
13/02/2005 00:00:00	-1.605872791	-1.457924228
13/02/2005 01:00:00	-2.028705535	-1.625494209
13/02/2005 02:00:00	-2.373653283	-1.75564864
13/02/2005 03:00:00	-2.616597274	-1.83622557
13/02/2005 04:00:00	-2.733418746	-1.85506305
13/02/2005 05:00:00	-2.69999894	-1.799999126
13/02/2005 06:00:00	-2.501740899	-1.663848458
13/02/2005 07:00:00	-2.162133863	-1.459331594
13/02/2005 08:00:00	-1.714188355	-1.204145422
13/02/2005 09:00:00	-1.1909149	-0.915986829
13/02/2005 10:00:00	-0.625324024	-0.612552702
13/02/2005 11:00:00	-0.050426251	-0.311539927
13/02/2005 12:00:00	0.500767894	-0.030645392
13/02/2005 13:00:00	0.995247885	0.212434016
13/02/2005 14:00:00	1.400003199	0.400001411
13/02/2005 15:00:00	1.689621366	0.518799075
13/02/2005 16:00:00	1.869081314	0.573325481
13/02/2005 17:00:00	1.950959604	0.572518028
13/02/2005 18:00:00	1.947832803	0.525314113
13/02/2005 19:00:00	1.872277473	0.440651136
13/02/2005 20:00:00	1.73687018	0.327466495
13/02/2005 21:00:00	1.554187488	0.194697587
13/02/2005 22:00:00	1.33680596	0.051281813
13/02/2005 23:00:00	1.097302162	-0.093843431
14/02/2005 00:00:00	0.848252657	-0.231740745
14/02/2005 01:00:00	0.602234009	-0.353472732
14/02/2005 02:00:00	0.371822784	-0.450101992
14/02/2005 03:00:00	0.169595545	-0.512691128
14/02/2005 04:00:00	0.008128856	-0.53230274
14/02/2005 05:00:00	-0.100000718	-0.499999431
14/02/2005 06:00:00	-0.146334871	-0.410549754
14/02/2005 07:00:00	-0.138887874	-0.273545656
14/02/2005 08:00:00	-0.089792025	-0.102284829
14/02/2005 09:00:00	-0.011179622	0.089935034
14/02/2005 10:00:00	0.084817035	0.289816241
14/02/2005 11:00:00	0.186065647	0.484061099
14/02/2005 12:00:00	0.280433916	0.659371916
14/02/2005 13:00:00	0.355789544	0.802451
14/02/2005 14:00:00	0.40000023	0.900000659
14/02/2005 15:00:00	0.404170561	0.942380396
14/02/2005 16:00:00	0.372352295	0.934578097
14/02/2005 17:00:00	0.311833891	0.885238638
14/02/2005 18:00:00	0.229903811	0.803006895
14/02/2005 19:00:00	0.133850513	0.696527743
14/02/2005 20:00:00	0.030962459	0.574446059
14/02/2005 21:00:00	-0.071471892	0.445406719
14/02/2005 22:00:00	-0.166164079	0.3180546
14/02/2005 23:00:00	-0.245825643	0.201034576
15/02/2005 00:00:00	-0.303168122	0.102991525
15/02/2005 01:00:00	-0.330903056	0.032570323
15/02/2005 02:00:00	-0.321741987	-0.001584155
15/02/2005 03:00:00	-0.268396452	0.009172968
15/02/2005 04:00:00	-0.163577992	0.073486568
15/02/2005 05:00:00	1.85232E-06	0.200001522
15/02/2005 06:00:00	0.224941329	0.392747908
15/02/2005 07:00:00	0.495078363	0.637297148
15/02/2005 08:00:00	0.789560935	0.914606129
15/02/2005 09:00:00	1.087537022	1.205631738
15/02/2005 10:00:00	1.368154606	1.491330862
15/02/2005 11:00:00	1.610561664	1.752660389
15/02/2005 12:00:00	1.793906175	1.970577206
15/02/2005 13:00:00	1.89733612	2.126038199
15/02/2005 14:00:00	1.899999478	2.200000257
15/02/2005 15:00:00	1.787720381	2.178967009
15/02/2005 16:00:00	1.573026814	2.071628425
15/02/2005 17:00:00	1.275122534	1.892220901
15/02/2005 18:00:00	0.913211296	1.654980833
15/02/2005 19:00:00	0.506496857	1.374144614
15/02/2005 20:00:00	0.074182973	1.063948641
15/02/2005 21:00:00	-0.364526601	0.738629309
15/02/2005 22:00:00	-0.790428108	0.412423013
15/02/2005 23:00:00	-1.184317793	0.099566149
16/02/2005 00:00:00	-1.526991898	-0.185704888
16/02/2005 01:00:00	-1.799246668	-0.429153704
16/02/2005 02:00:00	-1.981878347	-0.616543901
16/02/2005 03:00:00	-2.055683179	-0.733639086
16/02/2005 04:00:00	-2.001457408	-0.766202863
16/02/2005 05:00:00	-1.799997278	-0.699998836
16/02/2005 06:00:00	-1.441711498	-0.52749777
16/02/2005 07:00:00	-0.955457534	-0.267998286
16/02/2005 08:00:00	-0.379704756	0.052494222
16/02/2005 09:00:00	0.247077464	0.407974363
16/02/2005 10:00:00	0.886419752	0.772436743
16/02/2005 11:00:00	1.499852738	1.119875972
16/02/2005 12:00:00	2.048907049	1.424286656
16/02/2005 13:00:00	2.495113313	1.659663403
16/02/2005 14:00:00	2.800002157	1.80000082
16/02/2005 15:00:00	2.935280468	1.826340619
16/02/2005 16:00:00	2.913358964	1.747912101
16/02/2005 17:00:00	2.756824031	1.580991257
16/02/2005 18:00:00	2.48826205	1.341854081
16/02/2005 19:00:00	2.130259405	1.046776564
16/02/2005 20:00:00	1.705402477	0.712034699
16/02/2005 21:00:00	1.236277652	0.353904478
16/02/2005 22:00:00	0.74547131	-0.011338106
16/02/2005 23:00:00	0.255569836	-0.367417062
17/02/2005 00:00:00	-0.210840388	-0.698056396
17/02/2005 01:00:00	-0.631172979	-0.986980117
17/02/2005 02:00:00	-0.982841554	-1.217912232
17/02/2005 03:00:00	-1.24325973	-1.374576748
17/02/2005 04:00:00	-1.389841124	-1.440697675
17/02/2005 05:00:00	-1.399999353	-1.399999018
17/02/2005 06:00:00	-1.261264038	-1.244104459
17/02/2005 07:00:00	-1.001627617	-0.996235428
17/02/2005 08:00:00	-0.659197931	-0.687512564
17/02/2005 09:00:00	-0.272082825	-0.349056502
17/02/2005 10:00:00	0.12160986	-0.01198788
17/02/2005 11:00:00	0.483772282	0.292572665
17/02/2005 12:00:00	0.776296596	0.533504497
17/02/2005 13:00:00	0.961074962	0.679686979
17/02/2005 14:00:00	0.999999536	0.699999473
17/02/2005 15:00:00	0.866083355	0.572762125
17/02/2005 16:00:00	0.576821648	0.314057076
17/02/2005 17:00:00	0.16082986	-0.050593313
17/02/2005 18:00:00	-0.353276564	-0.495666682
17/02/2005 19:00:00	-0.936882178	-0.99564067
17/02/2005 20:00:00	-1.561371537	-1.524992918
17/02/2005 21:00:00	-2.198129197	-2.058201064
17/02/2005 22:00:00	-2.818539711	-2.569742749
17/02/2005 23:00:00	-3.393987635	-3.034095611
18/02/2005 00:00:00	-3.895857523	-3.425737291
18/02/2005 01:00:00	-4.29553393	-3.719145428
18/02/2005 02:00:00	-4.564401411	-3.888797662
18/02/2005 03:00:00	-4.673844521	-3.909171632
18/02/2005 04:00:00	-4.595247814	-3.754744978
18/02/2005 05:00:00	-4.299995846	-3.39999534
18/02/2005 06:00:00	-3.773641319	-2.832731952
18/02/2005 07:00:00	-3.058407825	-2.09408882
18/02/2005 08:00:00	-2.210686248	-1.238530743
18/02/2005 09:00:00	-1.286867473	-0.320522517
18/02/2005 10:00:00	-0.343342385	0.60547106
18/02/2005 11:00:00	0.563498133	1.484985192
18/02/2005 12:00:00	1.377263194	2.26355508
18/02/2005 13:00:00	2.041561915	2.886715929
18/02/2005 14:00:00	2.50000341	3.300002939
18/02/2005 15:00:00	2.71118153	3.463713694
18/02/2005 16:00:00	2.693627241	3.397193496
18/02/2005 17:00:00	2.480855333	3.134549131
18/02/2005 18:00:00	2.106380596	2.709887385
18/02/2005 19:00:00	1.60371782	2.157315044
18/02/2005 20:00:00	1.006381796	1.510938891
18/02/2005 21:00:00	0.347887314	0.804865714
18/02/2005 22:00:00	-0.338250837	0.073202298
18/02/2005 23:00:00	-1.018517865	-0.649944572
19/02/2005 00:00:00	-1.659398981	-1.330468111
19/02/2005 01:00:00	-2.227379395	-1.934261533
19/02/2005 02:00:00	-2.688944316	-2.427218052
19/02/2005 03:00:00	-3.010578955	-2.775230883
19/02/2005 04:00:00	-3.15876852	-2.94419324
19/02/2005 05:00:00	-3.099998223	-2.899998338
19/02/2005 06:00:00	-2.816216067	-2.624064442
19/02/2005 07:00:00	-2.351219334	-2.159908106
19/02/2005 08:00:00	-1.76426715	-1.566569979
19/02/2005 09:00:00	-1.114618643	-0.903090713
19/02/2005 10:00:00	-0.461532936	-0.228510957
19/02/2005 11:00:00	0.135730843	0.398128638
19/02/2005 12:00:00	0.617913569	0.917787423
19/02/2005 13:00:00	0.925756116	1.271424748
19/02/2005 14:00:00	0.999999357	1.399999962
19/02/2005 15:00:00	0.79919638	1.261636312
19/02/2005 16:00:00	0.353146922	0.8831105
19/02/2005 17:00:00	-0.290538171	0.308362062
19/02/2005 18:00:00	-1.084248052	-0.418669466
19/02/2005 19:00:00	-1.980371875	-1.254044548
19/02/2005 20:00:00	-2.931298792	-2.153823647
19/02/2005 21:00:00	-3.889417957	-3.074067229
19/02/2005 22:00:00	-4.807118523	-3.970835757
19/02/2005 23:00:00	-5.636789644	-4.800189695
20/02/2005 00:00:00	-6.330820472	-5.518189507
20/02/2005 01:00:00	-6.841600162	-6.080895657
20/02/2005 02:00:00	-7.121517865	-6.44436861
20/02/2005 03:00:00	-7.122962736	-6.564668828
20/02/2005 04:00:00	-6.798323928	-6.397856778
20/02/2005 05:00:00	-6.099990593	-5.899992921
20/02/2005 06:00:00	-5.005396543	-5.048576084
20/02/2005 07:00:00	-3.592151083	-3.906855848
20/02/2005 08:00:00	-1.962906604	-2.559518814
20/02/2005 09:00:00	-0.220315501	-1.091251582
20/02/2005 10:00:00	1.532969834	0.413259249
20/02/2005 11:00:00	3.194297007	1.869327077
20/02/2005 12:00:00	4.661013626	3.192265304
20/02/2005 13:00:00	5.830467297	4.297387328
20/02/2005 14:00:00	6.600005628	5.100006551
20/02/2005 15:00:00	6.895762374	5.538117908
20/02/2005 16:00:00	6.759012263	5.640439626
20/02/2005 17:00:00	6.259814355	5.458370038
20/02/2005 18:00:00	5.46822771	5.043307477
20/02/2005 19:00:00	4.45431139	4.446650277
20/02/2005 20:00:00	3.288124453	3.71979677
20/02/2005 21:00:00	2.039725963	2.914145289
20/02/2005 22:00:00	0.779174978	2.081094168
20/02/2005 23:00:00	-0.42346944	1.272041739
21/02/2005 00:00:00	-1.498148231	0.538386335
21/02/2005 01:00:00	-2.374802335	-0.06847371
21/02/2005 02:00:00	-2.98337269	-0.497140064
21/02/2005 03:00:00	-3.253800236	-0.696214393
21/02/2005 04:00:00	-3.116025913	-0.614298365
21/02/2005 05:00:00	-2.49999066	-0.199993646
21/02/2005 06:00:00	-1.368593561	0.574960322
21/02/2005 07:00:00	0.183437924	1.646275952
21/02/2005 08:00:00	2.028420291	2.926529358
21/02/2005 09:00:00	4.038670038	4.328296653
21/02/2005 10:00:00	6.086503663	5.764153953
21/02/2005 11:00:00	8.044237661	7.14667737
21/02/2005 12:00:00	9.784188531	8.388443019
21/02/2005 13:00:00	11.17867277	9.402027015
21/02/2005 14:00:00	12.10000687	10.10000547
21/02/2005 15:00:00	12.45537736	10.41873336
21/02/2005 16:00:00	12.29144635	10.38967801
21/02/2005 17:00:00	11.68974372	10.06808409
21/02/2005 18:00:00	10.73179939	9.50919628
21/02/2005 19:00:00	9.499143234	8.768259231
21/02/2005 20:00:00	8.07330516	7.900517613
21/02/2005 21:00:00	6.535815058	6.961216093
21/02/2005 22:00:00	4.968202824	6.005599336
21/02/2005 23:00:00	3.451998353	5.08891201
22/02/2005 00:00:00	2.068731541	4.266398778
22/02/2005 01:00:00	0.899932282	3.593304309
22/02/2005 02:00:00	0.027130471	3.124873267
22/02/2005 03:00:00	-0.468143997	2.916350318
22/02/2005 04:00:00	-0.504361226	3.02298013
22/02/2005 05:00:00	8.67909E-06	3.500007367
22/02/2005 06:00:00	1.089706919	4.377193793
22/02/2005 07:00:00	2.662324703	5.582372865
22/02/2005 08:00:00	4.578666934	7.017896793
22/02/2005 09:00:00	6.699538515	8.586117786
22/02/2005 10:00:00	8.885744351	10.18938805
22/02/2005 11:00:00	10.99808935	11.73005981
22/02/2005 12:00:00	12.8973784	13.11048525
22/02/2005 13:00:00	14.44441643	14.2330166
22/02/2005 14:00:00	15.50000832	15.00000607
22/02/2005 15:00:00	15.96131337	15.33936535
22/02/2005 16:00:00	15.87090368	15.28124081
22/02/2005 17:00:00	15.30770334	14.88133665
22/02/2005 18:00:00	14.35063646	14.19535705
22/02/2005 19:00:00	13.07862713	13.27900619
22/02/2005 20:00:00	11.57059947	12.18798827
22/02/2005 21:00:00	9.905477566	10.97800748
22/02/2005 22:00:00	8.162185527	9.704767996
22/02/2005 23:00:00	6.419647454	8.423974019
23/02/2005 00:00:00	4.75678745	7.191329733
23/02/2005 01:00:00	3.252529615	6.062539327
23/02/2005 02:00:00	1.985798052	5.093306991
23/02/2005 03:00:00	1.035516863	4.339336912
23/02/2005 04:00:00	0.48061015	3.856333279
23/02/2005 05:00:00	0.400002014	3.700000282
23/02/2005 06:00:00	0.84059856	3.90329196
23/02/2005 07:00:00	1.721238129	4.408164768
23/02/2005 08:00:00	2.928743182	5.133826517
23/02/2005 09:00:00	4.349936178	5.999485018
23/02/2005 10:00:00	5.871639578	6.924348081
23/02/2005 11:00:00	7.380675841	7.827623516
23/02/2005 12:00:00	8.763867428	8.628519134
23/02/2005 13:00:00	9.908036797	9.246242745
23/02/2005 14:00:00	10.70000641	9.60000216
23/02/2005 15:00:00	11.05520559	9.630637863
23/02/2005 16:00:00	11.00348727	9.36551815
23/02/2005 17:00:00	10.60330936	8.853642554
23/02/2005 18:00:00	9.913129752	8.144010606
23/02/2005 19:00:00	8.991406357	7.285621838
23/02/2005 20:00:00	7.89659707	6.327475781
23/02/2005 21:00:00	6.687159792	5.318571968
23/02/2005 22:00:00	5.421552424	4.307909929
23/02/2005 23:00:00	4.158232866	3.344489197
24/02/2005 00:00:00	2.955659018	2.477309302
24/02/2005 01:00:00	1.872288781	1.755369778
24/02/2005 02:00:00	0.966580055	1.227670154
24/02/2005 03:00:00	0.296990741	0.943209963
24/02/2005 04:00:00	-0.07802126	0.950988737
24/02/2005 05:00:00	-0.09999805	1.300006007
24/02/2005 06:00:00	0.265602136	2.015965942
24/02/2005 07:00:00	0.957659718	3.031394389
24/02/2005 08:00:00	1.891140591	4.2555234
24/02/2005 09:00:00	2.981010645	5.597585027
24/02/2005 10:00:00	4.142235775	6.966811321
24/02/2005 11:00:00	5.289781871	8.272434333
24/02/2005 12:00:00	6.338614828	9.423686115
24/02/2005 13:00:00	7.203700537	10.32979872
24/02/2005 14:00:00	7.800004891	10.9000042
24/02/2005 15:00:00	8.064044799	11.0678844
24/02/2005 16:00:00	8.018538325	10.86441707
24/02/2005 17:00:00	7.707753091	10.34492812
24/02/2005 18:00:00	7.175956717	9.564743448
24/02/2005 19:00:00	6.467416826	8.579188954
24/02/2005 20:00:00	5.626401038	7.443590541
24/02/2005 21:00:00	4.697176977	6.21327411
24/02/2005 22:00:00	3.724012263	4.943565564
24/02/2005 23:00:00	2.751174518	3.689790803
25/02/2005 00:00:00	1.822931364	2.50727573
25/02/2005 01:00:00	0.983550423	1.451346246
25/02/2005 02:00:00	0.277299315	0.577328253
25/02/2005 03:00:00	-0.251554337	-0.059452348
25/02/2005 04:00:00	-0.558742911	-0.403669654
25/02/2005 05:00:00	-0.599998786	-0.399997765
25/02/2005 06:00:00	-0.349710361	-0.016317014
25/02/2005 07:00:00	0.143112435	0.686670493
25/02/2005 08:00:00	0.810804928	1.625058003
25/02/2005 09:00:00	1.585702445	2.714938761
25/02/2005 10:00:00	2.400140313	3.872406014
25/02/2005 11:00:00	3.186453856	5.013553008
25/02/2005 12:00:00	3.876978403	6.054472989
25/02/2005 13:00:00	4.404049279	6.911259203
25/02/2005 14:00:00	4.700001811	7.500004896
25/02/2005 15:00:00	4.715811004	7.758430755
25/02/2005 16:00:00	4.477008015	7.710764253
25/02/2005 17:00:00	4.027762398	7.402858817
25/02/2005 18:00:00	3.412243707	6.880567871
25/02/2005 19:00:00	2.674621495	6.189744841
25/02/2005 20:00:00	1.859065315	5.376243153
25/02/2005 21:00:00	1.009744721	4.485916231
25/02/2005 22:00:00	0.170829266	3.564617503
25/02/2005 23:00:00	-0.613511496	2.658200393
26/02/2005 00:00:00	-1.299108011	1.812518327
26/02/2005 01:00:00	-1.841790727	1.07342473
26/02/2005 02:00:00	-2.197390089	0.486773028
26/02/2005 03:00:00	-2.321736544	0.098416647
26/02/2005 04:00:00	-2.17066054	-0.045790988
26/02/2005 05:00:00	-1.699992521	0.100003548
26/02/2005 06:00:00	-0.887107677	0.561861488
26/02/2005 07:00:00	0.204442836	1.286678045
26/02/2005 08:00:00	1.489564617	2.201557612
26/02/2005 09:00:00	2.883163266	3.233604587
26/02/2005 10:00:00	4.300144382	4.309923363
26/02/2005 11:00:00	5.655413565	5.357618336
26/02/2005 12:00:00	6.863876415	6.303793901
26/02/2005 13:00:00	7.840438532	7.075554455
26/02/2005 14:00:00	8.500005514	7.600004392
26/02/2005 15:00:00	8.780745975	7.823650084
26/02/2005 16:00:00	8.713877323	7.770603104
26/02/2005 17:00:00	8.353878352	7.484375639
26/02/2005 18:00:00	7.755227856	7.008479881
26/02/2005 19:00:00	6.972404628	6.386428019
26/02/2005 20:00:00	6.059887462	5.661732244
26/02/2005 21:00:00	5.072155152	4.877904745
26/02/2005 22:00:00	4.063686491	4.078457713
26/02/2005 23:00:00	3.088960274	3.306903338
27/02/2005 00:00:00	2.202455293	2.60675381
27/02/2005 01:00:00	1.458650343	2.021521318
27/02/2005 02:00:00	0.912024216	1.594718053
27/02/2005 03:00:00	0.617055708	1.369856206
27/02/2005 04:00:00	0.628223611	1.390447965
27/02/2005 05:00:00	1.00000672	1.700005521
27/02/2005 06:00:00	1.76141974	2.321095284
27/02/2005 07:00:00	2.839624633	3.192503503
27/02/2005 08:00:00	4.13632107	4.232072128
27/02/2005 09:00:00	5.553208726	5.357643108
27/02/2005 10:00:00	6.991987275	6.487058394
27/02/2005 11:00:00	8.354356388	7.538159934
27/02/2005 12:00:00	9.54201574	8.428789679
27/02/2005 13:00:00	10.456665	9.076789579
27/02/2005 14:00:00	11.00000385	9.400001582
27/02/2005 15:00:00	11.10118514	9.340118461
27/02/2005 16:00:00	10.7991705	8.934232879
27/02/2005 17:00:00	10.16037283	8.243286627
27/02/2005 18:00:00	9.251204983	7.328221493
27/02/2005 19:00:00	8.138079839	6.249979267
27/02/2005 20:00:00	6.88741027	5.069501739
27/02/2005 21:00:00	5.565609149	3.847730696
27/02/2005 22:00:00	4.239089347	2.64560793
27/02/2005 23:00:00	2.974263739	1.524075229
28/02/2005 00:00:00	1.837545196	0.544074383
28/02/2005 01:00:00	0.895346591	-0.233452819
28/02/2005 02:00:00	0.214080798	-0.747564587
28/02/2005 03:00:00	-0.139839312	-0.937319133
28/02/2005 04:00:00	-0.100000866	-0.741774667
28/02/2005 05:00:00	0.400009009	-0.099989399
28/02/2005 06:00:00	1.395921921	1.019056652
28/02/2005 07:00:00	2.800748831	2.526700534
28/02/2005 08:00:00	4.496821638	4.304359639
28/02/2005 09:00:00	6.366472243	6.233451355
28/02/2005 10:00:00	8.292032546	8.195393075
28/02/2005 11:00:00	10.15583445	10.07160219
28/02/2005 12:00:00	11.84020985	11.74349609
28/02/2005 13:00:00	13.22749065	13.09249216
28/02/2005 14:00:00	14.20000875	14.0000078
28/02/2005 15:00:00	14.67108911	14.37940253
28/02/2005 16:00:00	14.67802446	14.27179984
28/02/2005 17:00:00	14.28909836	13.75026304
28/02/2005 18:00:00	13.57259436	12.88785544
28/02/2005 19:00:00	12.59679601	11.75764034
28/02/2005 20:00:00	11.42998687	10.43268106
28/02/2005 21:00:00	10.14045048	8.986040911
28/02/2005 22:00:00	8.796470412	7.490783202
28/02/2005 23:00:00	7.466330206	6.019971244
01/03/2005 00:00:00	6.218313419	4.646668348
01/03/2005 01:00:00	5.120703604	3.443937824
01/03/2005 02:00:00	4.241784314	2.484842984
01/03/2005 03:00:00	3.649839102	1.842447137
01/03/2005 04:00:00	3.413151523	1.589813596
01/03/2005 05:00:00	3.600005127	1.80000567
01/03/2005 06:00:00	4.249453687	2.514707976
01/03/2005 07:00:00	5.283636103	3.650094937
01/03/2005 08:00:00	6.595463629	5.090964573
01/03/2005 09:00:00	8.077847517	6.722114902
01/03/2005 10:00:00	9.623699021	8.428343944
01/03/2005 11:00:00	11.12592939	10.09444972
01/03/2005 12:00:00	12.47744989	11.60523024
01/03/2005 13:00:00	13.57117176	12.84548354
01/03/2005 14:00:00	14.30000625	13.70000763
01/03/2005 15:00:00	14.58476908	14.08341103
01/03/2005 16:00:00	14.45788968	14.02953987
01/03/2005 17:00:00	13.9796999	13.6020486
01/03/2005 18:00:00	13.21053157	12.86459167
01/03/2005 19:00:00	12.21071653	11.88082352
01/03/2005 20:00:00	11.04058664	10.71439861
01/03/2005 21:00:00	9.760473723	9.42897137
01/03/2005 22:00:00	8.430709629	8.088196253
01/03/2005 23:00:00	7.111626199	6.755727705
02/03/2005 00:00:00	5.863555274	5.495220171
02/03/2005 01:00:00	4.746828697	4.370328099
02/03/2005 02:00:00	3.82177831	3.444705933
02/03/2005 03:00:00	3.148735953	2.782008122
02/03/2005 04:00:00	2.788033469	2.445889109
02/03/2005 05:00:00	2.8000027	2.500003343
02/03/2005 06:00:00	3.219003844	2.980500236
02/03/2005 07:00:00	3.97551438	3.813513149
02/03/2005 08:00:00	4.97404207	4.897672453
02/03/2005 09:00:00	6.119094675	6.131608515
02/03/2005 10:00:00	7.315179957	7.413951704
02/03/2005 11:00:00	8.466805677	8.643332389
02/03/2005 12:00:00	9.478479597	9.718380939
02/03/2005 13:00:00	10.25470948	10.53772772
02/03/2005 14:00:00	10.70000308	11.00000311
02/03/2005 15:00:00	10.74499284	11.03179275
02/03/2005 16:00:00	10.42480593	10.67149925
02/03/2005 17:00:00	9.800692285	9.985478419
02/03/2005 18:00:00	8.933901797	9.040086068
02/03/2005 19:00:00	7.885684381	7.901678001
02/03/2005 20:00:00	6.717289947	6.636610026
02/03/2005 21:00:00	5.489968404	5.311237949
02/03/2005 22:00:00	4.264969662	3.991917577
02/03/2005 23:00:00	3.103543631	2.745004718
03/03/2005 00:00:00	2.066940221	1.636855179
03/03/2005 01:00:00	1.216409341	0.733824766
03/03/2005 02:00:00	0.6132009	0.102269287
03/03/2005 03:00:00	0.31856481	-0.191455451
03/03/2005 04:00:00	0.393750978	-0.080993641
03/03/2005 05:00:00	0.900009316	0.500010524
03/03/2005 06:00:00	1.869287229	1.586153003
03/03/2005 07:00:00	3.21632652	3.084995148
03/03/2005 08:00:00	4.826568697	4.872340855
03/03/2005 09:00:00	6.585455267	6.823994021
03/03/2005 10:00:00	8.378427735	8.815758542
03/03/2005 11:00:00	10.09092761	10.72343831
03/03/2005 12:00:00	11.6083964	12.42283723
03/03/2005 13:00:00	12.8162756	13.78975919
03/03/2005 14:00:00	13.60000673	14.70000809
03/03/2005 15:00:00	13.87559285	15.0624854
03/03/2005 16:00:00	13.68127855	14.9184779
03/03/2005 17:00:00	13.08586767	14.34236744
03/03/2005 18:00:00	12.15816407	13.40853586
03/03/2005 19:00:00	10.96697157	12.19136502
03/03/2005 20:00:00	9.581094027	10.76523677
03/03/2005 21:00:00	8.06933527	9.204532948
03/03/2005 22:00:00	6.500499142	7.583635407
03/03/2005 23:00:00	4.943389484	5.976925996
04/03/2005 00:00:00	3.466810137	4.458786562
04/03/2005 01:00:00	2.13956494	3.103598956
04/03/2005 02:00:00	1.030457734	1.985745024
04/03/2005 03:00:00	0.208292359	1.179606616
04/03/2005 04:00:00	-0.258127344	0.75956558
04/03/2005 05:00:00	-0.299997536	0.800003765
04/03/2005 06:00:00	0.122018876	1.343260075
04/03/2005 07:00:00	0.929396501	2.303506532
04/03/2005 08:00:00	2.014145451	3.562874666
04/03/2005 09:00:00	3.268275839	5.003496006
04/03/2005 10:00:00	4.58379778	6.507502081
04/03/2005 11:00:00	5.852721386	7.957024418
04/03/2005 12:00:00	6.967056771	9.234194548
04/03/2005 13:00:00	7.818814049	10.221144
04/03/2005 14:00:00	8.300003331	10.8000043
04/03/2005 15:00:00	8.332408676	10.88494912
04/03/2005 16:00:00	7.956905333	10.5183158
04/03/2005 17:00:00	7.24414021	9.774481341
04/03/2005 18:00:00	6.264760211	8.727822751
04/03/2005 19:00:00	5.08941224	7.452717041
04/03/2005 20:00:00	3.788743205	6.023541223
04/03/2005 21:00:00	2.433400009	4.514672305
04/03/2005 22:00:00	1.094029559	3.000487297
04/03/2005 23:00:00	-0.158721241	1.555363208
05/03/2005 00:00:00	-1.254205486	0.253677048
05/03/2005 01:00:00	-2.121776269	-0.830194172
05/03/2005 02:00:00	-2.690786686	-1.621873445
05/03/2005 03:00:00	-2.890589831	-2.046983759
05/03/2005 04:00:00	-2.650538799	-2.031148106
05/03/2005 05:00:00	-1.899986684	-1.499989475
05/03/2005 06:00:00	-0.603245624	-0.412523183
05/03/2005 07:00:00	1.135541505	1.138671337
05/03/2005 08:00:00	3.177275499	3.027624916
05/03/2005 09:00:00	5.382857154	5.128368388
05/03/2005 10:00:00	7.613187262	7.314932584
05/03/2005 11:00:00	9.72916662	9.461348336
05/03/2005 12:00:00	11.59169602	11.44164648
05/03/2005 13:00:00	13.06167627	13.12985784
05/03/2005 14:00:00	14.00000814	14.40001326
05/03/2005 15:00:00	14.30650062	15.15861094
05/03/2005 16:00:00	14.03658928	15.44201354
05/03/2005 17:00:00	13.28461481	15.31904856
05/03/2005 18:00:00	12.14491794	14.8585435
05/03/2005 19:00:00	10.71183936	14.12932587
05/03/2005 20:00:00	9.079719779	13.20022316
05/03/2005 21:00:00	7.342899914	12.14006287
05/03/2005 22:00:00	5.595720467	11.01767251
05/03/2005 23:00:00	3.932522145	9.90187957
06/03/2005 00:00:00	2.447645657	8.861511557
06/03/2005 01:00:00	1.235431709	7.965395971
06/03/2005 02:00:00	0.390221009	7.282360312
06/03/2005 03:00:00	0.006354264	6.88123208
06/03/2005 04:00:00	0.178172181	6.830838776
06/03/2005 05:00:00	1.000015469	7.200007902
06/03/2005 06:00:00	2.522171233	8.027992027
06/03/2005 07:00:00	4.618719121	9.235748663
06/03/2005 08:00:00	7.119688648	10.71466272
06/03/2005 09:00:00	9.855109329	12.35611911
06/03/2005 10:00:00	12.65501068	14.05150274
06/03/2005 11:00:00	15.34942222	15.69219852
06/03/2005 12:00:00	17.76837346	17.16959137
06/03/2005 13:00:00	19.74189392	18.37506619
06/03/2005 14:00:00	21.10001312	19.2000079
06/03/2005 15:00:00	21.71831967	19.56506118
06/03/2005 16:00:00	21.65463139	19.50790522
06/03/2005 17:00:00	21.01232159	19.09547667
06/03/2005 18:00:00	19.89476358	18.39471216
06/03/2005 19:00:00	18.40533068	17.47254835
06/03/2005 20:00:00	16.64739621	16.39592188
06/03/2005 21:00:00	14.72433346	15.2317694
06/03/2005 22:00:00	12.73951575	14.04702755
06/03/2005 23:00:00	10.7963164	12.90863298
07/03/2005 00:00:00	8.998108719	11.88352233
07/03/2005 01:00:00	7.448266014	11.03863225
07/03/2005 02:00:00	6.2501616	10.44089939
07/03/2005 03:00:00	5.507168789	10.15726039
07/03/2005 04:00:00	5.322660894	10.25465189
07/03/2005 05:00:00	5.800011225	10.80001054
07/03/2005 06:00:00	6.996862569	11.82911785
07/03/2005 07:00:00	8.78794291	13.25313966
07/03/2005 08:00:00	11.00225336	14.95208918
07/03/2005 09:00:00	13.46879504	16.80597962
07/03/2005 10:00:00	16.01656906	18.69482417
07/03/2005 11:00:00	18.47457652	20.49863604
07/03/2005 12:00:00	20.67181856	22.09742843
07/03/2005 13:00:00	22.43729627	23.37121455
07/03/2005 14:00:00	23.60001077	24.20000758
07/03/2005 15:00:00	24.03458566	24.4964911
07/03/2005 16:00:00	23.79812715	24.30402479
07/03/2005 17:00:00	22.99336024	23.69863609
07/03/2005 18:00:00	21.72300997	22.75635242
07/03/2005 19:00:00	20.08980134	21.55320122
07/03/2005 20:00:00	18.19645939	20.16520991
07/03/2005 21:00:00	16.14570912	18.66840591
07/03/2005 22:00:00	14.04027557	17.13881666
07/03/2005 23:00:00	11.98288374	15.65246958
08/03/2005 00:00:00	10.07625866	14.28539211
08/03/2005 01:00:00	8.423125352	13.11361166
08/03/2005 02:00:00	7.126208831	12.21315567
08/03/2005 03:00:00	6.288234118	11.66005156
08/03/2005 04:00:00	6.011926233	11.53032677
08/03/2005 05:00:00	6.400010195	11.90000871
08/03/2005 06:00:00	7.50974983	12.80967091
08/03/2005 07:00:00	9.216571555	14.15807698
08/03/2005 08:00:00	11.35044428	15.80853949
08/03/2005 09:00:00	13.74133691	17.62437101
08/03/2005 10:00:00	16.21921836	19.46888412
08/03/2005 11:00:00	18.61405753	21.20539139
08/03/2005 12:00:00	20.75582334	22.6972054
08/03/2005 13:00:00	22.47448469	23.80763871
08/03/2005 14:00:00	23.60001049	24.40000391
08/03/2005 15:00:00	24.0070275	24.37566839
08/03/2005 16:00:00	23.74878661	23.78821265
08/03/2005 17:00:00	22.92319291	22.72926892
08/03/2005 18:00:00	21.6281515	21.29046942
08/03/2005 19:00:00	19.96156747	19.56344638
08/03/2005 20:00:00	18.02134593	17.63983202
08/03/2005 21:00:00	15.90539196	15.61125857
08/03/2005 22:00:00	13.71161067	13.56935825
08/03/2005 23:00:00	11.53790715	11.60576328
09/03/2005 00:00:00	9.4821865	9.812105905
09/03/2005 01:00:00	7.642353814	8.280018333
09/03/2005 02:00:00	6.116314189	7.101132794
09/03/2005 03:00:00	5.001972722	6.367081512
09/03/2005 04:00:00	4.397234509	6.169496713
09/03/2005 05:00:00	4.400004648	6.600010622
09/03/2005 06:00:00	5.067559668	7.708747249
09/03/2005 07:00:00	6.294668521	9.379804571
09/03/2005 08:00:00	7.935474932	11.45577577
09/03/2005 09:00:00	9.844122628	13.77925401
09/03/2005 10:00:00	11.87475533	16.19283247
09/03/2005 11:00:00	13.88151677	18.53910434
09/03/2005 12:00:00	15.71855067	20.66066278
09/03/2005 13:00:00	17.24000076	22.40010097
09/03/2005 14:00:00	18.30001075	23.60001209
09/03/2005 15:00:00	18.79016433	24.14446683
09/03/2005 16:00:00	18.75179872	24.08343909
09/03/2005 17:00:00	18.26368801	23.50837688
09/03/2005 18:00:00	17.40460627	22.51072817
09/03/2005 19:00:00	16.2533276	21.18194096
09/03/2005 20:00:00	14.88862607	19.61346325
09/03/2005 21:00:00	13.38927577	17.89674302
09/03/2005 22:00:00	11.83405078	16.12322828
09/03/2005 23:00:00	10.30172518	14.384367
10/03/2005 00:00:00	8.871073049	12.7716072
10/03/2005 01:00:00	7.620868478	11.37639685
10/03/2005 02:00:00	6.629885547	10.29018395
10/03/2005 03:00:00	5.976898337	9.604416497
10/03/2005 04:00:00	5.740680931	9.410542478
10/03/2005 05:00:00	6.000007412	9.800009889
10/03/2005 06:00:00	6.798354065	10.82222882
10/03/2005 07:00:00	8.038011879	12.35846475
10/03/2005 08:00:00	9.585976988	14.24794878
10/03/2005 09:00:00	11.30924553	16.32991198
10/03/2005 10:00:00	13.07481363	18.44358546
10/03/2005 11:00:00	14.74967744	20.42820029
10/03/2005 12:00:00	16.20083308	22.12298757
10/03/2005 13:00:00	17.29527669	23.36717839
10/03/2005 14:00:00	17.90000441	24.00000382
10/03/2005 15:00:00	17.9174323	23.90422091
10/03/2005 16:00:00	17.39165026	23.13668317
10/03/2005 17:00:00	16.40216513	21.79776643
10/03/2005 18:00:00	15.02848379	19.98784649
10/03/2005 19:00:00	13.35011307	17.80729917
10/03/2005 20:00:00	11.44655984	15.35650029
10/03/2005 21:00:00	9.397330949	12.73582567
10/03/2005 22:00:00	7.281933259	10.04565111
10/03/2005 23:00:00	5.179873623	7.386352445
11/03/2005 00:00:00	3.170658897	4.858305481
11/03/2005 01:00:00	1.333795936	2.561886036
11/03/2005 02:00:00	-0.251208403	0.597469927
11/03/2005 03:00:00	-1.504847266	-0.934567031
11/03/2005 04:00:00	-2.347613796	-1.933849021
11/03/2005 05:00:00	-2.700001137	-2.300000227
11/03/2005 06:00:00	-2.514484706	-1.973328835
11/03/2005 07:00:00	-1.871463601	-1.056872159
11/03/2005 08:00:00	-0.883316488	0.305651924
11/03/2005 09:00:00	0.337577967	1.970525536
11/03/2005 10:00:00	1.678841097	3.7940308
11/03/2005 11:00:00	3.028094235	5.632449839
11/03/2005 12:00:00	4.272958715	7.342064775
11/03/2005 13:00:00	5.301055871	8.779157731
11/03/2005 14:00:00	6.000007036	9.80001083
11/03/2005 15:00:00	6.285740072	10.29618585
11/03/2005 16:00:00	6.187404138	10.30035723
11/03/2005 17:00:00	5.762452519	9.880476058
11/03/2005 18:00:00	5.068338498	9.104493421
11/03/2005 19:00:00	4.162515358	8.040360413
11/03/2005 20:00:00	3.102436384	6.756028127
11/03/2005 21:00:00	1.945554858	5.319447653
11/03/2005 22:00:00	0.749324064	3.798570084
11/03/2005 23:00:00	-0.428802714	2.261346512
12/03/2005 00:00:00	-1.531372193	0.775728028
12/03/2005 01:00:00	-2.50093109	-0.590334276
12/03/2005 02:00:00	-3.28002612	-1.768889308
12/03/2005 03:00:00	-3.811204001	-2.691985977
12/03/2005 04:00:00	-4.037011448	-3.29167319
12/03/2005 05:00:00	-3.899995179	-3.499999857
12/03/2005 06:00:00	-3.367449086	-3.275831009
12/03/2005 07:00:00	-2.505651521	-2.685291574
12/03/2005 08:00:00	-1.405625896	-1.821320308
12/03/2005 09:00:00	-0.158395619	-0.776855967
12/03/2005 10:00:00	1.145015902	0.355162695
12/03/2005 11:00:00	2.413585255	1.481796923
12/03/2005 12:00:00	3.556289033	2.510107962
12/03/2005 13:00:00	4.482103825	3.347157056
12/03/2005 14:00:00	5.100006223	3.900005451
12/03/2005 15:00:00	5.343441022	4.100192327
12/03/2005 16:00:00	5.243721625	3.977164401
12/03/2005 17:00:00	4.856627533	3.584844214
12/03/2005 18:00:00	4.237938246	2.97715431
12/03/2005 19:00:00	3.443433266	2.208017232
12/03/2005 20:00:00	2.528892093	1.331355524
12/03/2005 21:00:00	1.550094227	0.401091728
12/03/2005 22:00:00	0.562819171	-0.528851611
12/03/2005 23:00:00	-0.377153576	-1.404551951
13/03/2005 00:00:00	-1.214044513	-2.172086749
13/03/2005 01:00:00	-1.892074138	-2.77753346
13/03/2005 02:00:00	-2.355462951	-3.166969542
13/03/2005 03:00:00	-2.548431452	-3.286472452
13/03/2005 04:00:00	-2.415200138	-3.082119646
13/03/2005 05:00:00	-1.899989511	-2.499988582
13/03/2005 06:00:00	-0.972438857	-1.510761806
13/03/2005 07:00:00	0.296141794	-0.183537961
13/03/2005 08:00:00	1.809025829	1.387981357
13/03/2005 09:00:00	3.469486638	3.110094551
13/03/2005 10:00:00	5.180797608	4.889100025
13/03/2005 11:00:00	6.846232127	6.631296182
13/03/2005 12:00:00	8.369063585	8.242981426
13/03/2005 13:00:00	9.652565368	9.630454161
13/03/2005 14:00:00	10.60001087	10.70001279
13/03/2005 15:00:00	11.13997499	11.38166731
13/03/2005 16:00:00	11.30223433	11.70027
13/03/2005 17:00:00	11.14186479	11.70438263
13/03/2005 18:00:00	10.71394227	11.44256701
13/03/2005 19:00:00	10.07354268	10.96338491
13/03/2005 20:00:00	9.275741916	10.31539815
13/03/2005 21:00:00	8.37561589	9.547168494
13/03/2005 22:00:00	7.428240503	8.70725775
13/03/2005 23:00:00	6.488691658	7.844227706
14/03/2005 00:00:00	5.612045261	7.006640154
14/03/2005 01:00:00	4.853377215	6.243056884
14/03/2005 02:00:00	4.267763423	5.60203969
14/03/2005 03:00:00	3.910279791	5.132150361
14/03/2005 04:00:00	3.836002222	4.88195069
14/03/2005 05:00:00	4.100006621	4.900002469
14/03/2005 06:00:00	4.733792863	5.215324234
14/03/2005 07:00:00	5.674560868	5.77876494
14/03/2005 08:00:00	6.835936599	6.521632008
14/03/2005 09:00:00	8.131546021	7.375232856
14/03/2005 10:00:00	9.4750151	8.270874905
14/03/2005 11:00:00	10.7799698	9.139865575
14/03/2005 12:00:00	11.96003609	9.913512284
14/03/2005 13:00:00	12.92883992	10.52312245
14/03/2005 14:00:00	13.60000727	10.9000035
14/03/2005 15:00:00	13.91015267	10.99448148
14/03/2005 16:00:00	13.88784085	10.83295363
14/03/2005 17:00:00	13.58462309	10.46083411
14/03/2005 18:00:00	13.05205064	9.923537117
14/03/2005 19:00:00	12.34167478	9.266476826
14/03/2005 20:00:00	11.50504678	8.535067418
14/03/2005 21:00:00	10.59371791	7.774723073
14/03/2005 22:00:00	9.659239443	7.030857973
14/03/2005 23:00:00	8.75316264	6.348886297
15/03/2005 00:00:00	7.927038773	5.774222226
15/03/2005 01:00:00	7.232419113	5.35227994
15/03/2005 02:00:00	6.720854927	5.128473621
15/03/2005 03:00:00	6.443897487	5.148217447
15/03/2005 04:00:00	6.45309806	5.456925601
15/03/2005 05:00:00	6.800007917	6.100012262
15/03/2005 06:00:00	7.513234941	7.100492706
15/03/2005 07:00:00	8.529617563	8.391790578
15/03/2005 08:00:00	9.763052872	9.884932614
15/03/2005 09:00:00	11.12743796	11.49094555
15/03/2005 10:00:00	12.53666991	13.12085613
15/03/2005 11:00:00	13.90464582	14.68569108
15/03/2005 12:00:00	15.14526278	16.09647715
15/03/2005 13:00:00	16.17241788	17.26424106
15/03/2005 14:00:00	16.9000082	18.10000956
15/03/2005 15:00:00	17.26397143	18.5382488
15/03/2005 16:00:00	17.28840367	18.60717841
15/03/2005 17:00:00	17.01943963	18.35845536
15/03/2005 18:00:00	16.50321404	17.84373659
15/03/2005 19:00:00	15.78586161	17.11467906
15/03/2005 20:00:00	14.91351707	16.22293973
15/03/2005 21:00:00	13.93231512	15.22017555
15/03/2005 22:00:00	12.88839049	14.15804347
15/03/2005 23:00:00	11.8278779	13.08820045
16/03/2005 00:00:00	10.79691206	12.06230345
16/03/2005 01:00:00	9.841627696	11.13200942
16/03/2005 02:00:00	9.00815952	10.34897531
16/03/2005 03:00:00	8.342642251	9.764858073
16/03/2005 04:00:00	7.891210609	9.431314673
16/03/2005 05:00:00	7.699999312	9.400002062
16/03/2005 06:00:00	7.796347753	9.700570863
16/03/2005 07:00:00	8.132417425	10.27465036
16/03/2005 08:00:00	8.641576191	11.04186548
16/03/2005 09:00:00	9.257191917	11.92184118
16/03/2005 10:00:00	9.912632466	12.83420238
16/03/2005 11:00:00	10.5412657	13.69857403
16/03/2005 12:00:00	11.0764595	14.43458106
16/03/2005 13:00:00	11.4515817	14.9618484
16/03/2005 14:00:00	11.60000019	15.20000101
16/03/2005 15:00:00	11.47392453	15.09102817
16/03/2005 16:00:00	11.10092763	14.66637259
16/03/2005 17:00:00	10.52742242	13.97983929
16/03/2005 18:00:00	9.799821818	13.08523331
16/03/2005 19:00:00	8.964538729	12.03635967
16/03/2005 20:00:00	8.067986074	10.88702341
16/03/2005 21:00:00	7.156576767	9.691029544
16/03/2005 22:00:00	6.276723724	8.502183117
16/03/2005 23:00:00	5.47483986	7.374289154
17/03/2005 00:00:00	4.797338092	6.361152685
17/03/2005 01:00:00	4.290631334	5.51657874
17/03/2005 02:00:00	4.001132501	4.894372349
17/03/2005 03:00:00	3.975254511	4.548338542
17/03/2005 04:00:00	4.259410276	4.53228235
17/03/2005 05:00:00	4.900012715	4.900008802
17/03/2005 06:00:00	5.91896941	5.680140029
17/03/2005 07:00:00	7.240171106	6.800571175
17/03/2005 08:00:00	8.763005456	8.164016786
17/03/2005 09:00:00	10.38686011	9.673191407
17/03/2005 10:00:00	12.01112273	11.23080959
17/03/2005 11:00:00	13.53518097	12.73958587
17/03/2005 12:00:00	14.85842247	14.10223481
17/03/2005 13:00:00	15.8802349	15.22147094
17/03/2005 14:00:00	16.5000059	16.00000882
17/03/2005 15:00:00	16.64490648	16.36594476
17/03/2005 16:00:00	16.35323597	16.34889754
17/03/2005 17:00:00	15.69107448	16.00386537
17/03/2005 18:00:00	14.72450214	15.38584647
17/03/2005 19:00:00	13.51959905	14.54983904
17/03/2005 20:00:00	12.14244536	13.5508413
17/03/2005 21:00:00	10.65912117	12.44385147
17/03/2005 22:00:00	9.135706601	11.28386775
17/03/2005 23:00:00	7.638281783	10.12588837
18/03/2005 00:00:00	6.232926833	9.024911528
18/03/2005 01:00:00	4.98572187	8.035935447
18/03/2005 02:00:00	3.962747016	7.213958339
18/03/2005 03:00:00	3.230082392	6.613978416
18/03/2005 04:00:00	2.853808117	6.290993893
18/03/2005 05:00:00	2.900004313	6.300002984
18/03/2005 06:00:00	3.407548129	6.673375402
18/03/2005 07:00:00	4.306509869	7.352971063
18/03/2005 08:00:00	5.499759386	8.258023474
18/03/2005 09:00:00	6.890166532	9.307766148
18/03/2005 10:00:00	8.380601159	10.42143259
18/03/2005 11:00:00	9.873933118	11.51825632
18/03/2005 12:00:00	11.27303226	12.51747083
18/03/2005 13:00:00	12.48076844	13.33830965
18/03/2005 14:00:00	13.40001151	13.90000628
18/03/2005 15:00:00	13.95741873	14.14244485
18/03/2005 16:00:00	14.17479257	14.08810815
18/03/2005 17:00:00	14.09772069	13.78012763
18/03/2005 18:00:00	13.77179075	13.26163479
18/03/2005 19:00:00	13.24259041	12.5757611
18/03/2005 20:00:00	12.55570735	11.76563804
18/03/2005 21:00:00	11.75672922	10.87439709
18/03/2005 22:00:00	10.89124369	9.945169715
18/03/2005 23:00:00	10.00483841	9.0210874
19/03/2005 00:00:00	9.143101059	8.145281623
19/03/2005 01:00:00	8.351619294	7.360883859
19/03/2005 02:00:00	7.675980778	6.711025585
19/03/2005 03:00:00	7.161773174	6.23883828
19/03/2005 04:00:00	6.854584147	5.98745342
19/03/2005 05:00:00	6.800001358	6.000002483
19/03/2005 06:00:00	7.024410022	6.300951335
19/03/2005 07:00:00	7.477389157	6.840106909
19/03/2005 08:00:00	8.089317131	7.548612275
19/03/2005 09:00:00	8.790572313	8.357610505
19/03/2005 10:00:00	9.511533071	9.198244669
19/03/2005 11:00:00	10.18257777	10.00165784
19/03/2005 12:00:00	10.73408479	10.69899309
19/03/2005 13:00:00	11.09643248	11.22139348
19/03/2005 14:00:00	11.19999923	11.5000021
19/03/2005 15:00:00	10.99553257	11.48507354
19/03/2005 16:00:00	10.51525289	11.20330497
19/03/2005 17:00:00	9.811747861	10.70050328
19/03/2005 18:00:00	8.937605122	10.02247537
19/03/2005 19:00:00	7.945412328	9.215028125
19/03/2005 20:00:00	6.887757132	8.323968447
19/03/2005 21:00:00	5.817227185	7.395103229
19/03/2005 22:00:00	4.786410141	6.474239366
19/03/2005 23:00:00	3.847893651	5.607183753
20/03/2005 00:00:00	3.054265369	4.839743286
20/03/2005 01:00:00	2.458112945	4.217724858
20/03/2005 02:00:00	2.112024032	3.786935366
20/03/2005 03:00:00	2.068586283	3.593181703
20/03/2005 04:00:00	2.380387349	3.682270765
20/03/2005 05:00:00	3.100014884	4.100009447
20/03/2005 06:00:00	4.253435657	4.870657756
20/03/2005 07:00:00	5.760137962	5.932292237
20/03/2005 08:00:00	7.512991739	7.20144459
20/03/2005 09:00:00	9.404866925	8.594646518
20/03/2005 10:00:00	11.32863346	10.02842972
20/03/2005 11:00:00	13.17716128	11.4193259
20/03/2005 12:00:00	14.84332033	12.68386676
20/03/2005 13:00:00	16.21998054	13.738584
20/03/2005 14:00:00	17.20001185	14.50000933
20/03/2005 15:00:00	17.70426869	14.90610711
20/03/2005 16:00:00	17.76553807	14.98056839
20/03/2005 17:00:00	17.44458882	14.76851483
20/03/2005 18:00:00	16.80218978	14.31506808
20/03/2005 19:00:00	15.89910979	13.66534982
20/03/2005 20:00:00	14.79611767	12.86448171
20/03/2005 21:00:00	13.55398225	11.95758542
20/03/2005 22:00:00	12.23347238	10.9897826
20/03/2005 23:00:00	10.89535688	10.00619493
21/03/2005 00:00:00	9.600404593	9.051944074
21/03/2005 01:00:00	8.409384343	8.172151688
21/03/2005 02:00:00	7.383064968	7.411939442
21/03/2005 03:00:00	6.5822153	6.816429
21/03/2005 04:00:00	6.067604172	6.430742028
21/03/2005 05:00:00	5.900000419	6.300000188
21/03/2005 06:00:00	6.116257242	6.451298416
21/03/2005 07:00:00	6.657569916	6.839628176
21/03/2005 08:00:00	7.441220384	7.401955936
21/03/2005 09:00:00	8.384490586	8.07524816
21/03/2005 10:00:00	9.404662464	8.796471315
21/03/2005 11:00:00	10.41901796	9.502591868
21/03/2005 12:00:00	11.34483901	10.13057628
21/03/2005 13:00:00	12.09940757	10.61739103
21/03/2005 14:00:00	12.60000556	10.90000256
21/03/2005 15:00:00	12.78501686	10.931979
21/03/2005 16:00:00	12.67722894	10.73329182
21/03/2005 17:00:00	12.32052915	10.3405125
21/03/2005 18:00:00	11.75880485	9.79021258
21/03/2005 19:00:00	11.03594339	9.118963551
21/03/2005 20:00:00	10.19583213	8.363336926
21/03/2005 21:00:00	9.282358437	7.559904211
21/03/2005 22:00:00	8.339409656	6.745236917
21/03/2005 23:00:00	7.410873147	5.95590655
22/03/2005 00:00:00	6.540636266	5.22848462
22/03/2005 01:00:00	5.772586371	4.599542634
22/03/2005 02:00:00	5.150610818	4.1056521
22/03/2005 03:00:00	4.718596963	3.783384527
22/03/2005 04:00:00	4.520432164	3.669311424
22/03/2005 05:00:00	4.600003776	3.800004297
22/03/2005 06:00:00	4.981505989	4.194441293
22/03/2005 07:00:00	5.610364152	4.801230521
22/03/2005 08:00:00	6.412312361	5.55138844
22/03/2005 09:00:00	7.313084712	6.375931506
22/03/2005 10:00:00	8.238415301	7.205876177
22/03/2005 11:00:00	9.114038224	7.97223891
22/03/2005 12:00:00	9.865687575	8.606036163
22/03/2005 13:00:00	10.41909745	9.038284392
22/03/2005 14:00:00	10.70000195	9.200000056
22/03/2005 15:00:00	10.65558441	9.043014487
22/03/2005 16:00:00	10.31882098	8.60241445
22/03/2005 17:00:00	9.744134934	7.934099556
22/03/2005 18:00:00	8.985949576	7.093969412
22/03/2005 19:00:00	8.098688193	6.13792363
22/03/2005 20:00:00	7.136774077	5.121861817
22/03/2005 21:00:00	6.154630518	4.101683583
22/03/2005 22:00:00	5.206680809	3.133288538
22/03/2005 23:00:00	4.347348239	2.27257629
23/03/2005 00:00:00	3.631056101	1.575446448
23/03/2005 01:00:00	3.112227685	1.097798622
23/03/2005 02:00:00	2.845286282	0.895532422
23/03/2005 03:00:00	2.884655183	1.024547455
23/03/2005 04:00:00	3.28475768	1.540743332
23/03/2005 05:00:00	4.100017064	2.500019661
23/03/2005 06:00:00	5.356186996	3.928788413
23/03/2005 07:00:00	6.964348261	5.7355168
23/03/2005 08:00:00	8.806914833	7.799187294
23/03/2005 09:00:00	10.76630069	9.998782368
23/03/2005 10:00:00	12.7249198	12.2132845
23/03/2005 11:00:00	14.56518614	14.32167615
23/03/2005 12:00:00	16.16951369	16.2029398
23/03/2005 13:00:00	17.42031643	17.73605792
23/03/2005 14:00:00	18.20000831	18.80001299
23/03/2005 15:00:00	18.42335932	19.30600589
23/03/2005 16:00:00	18.13455695	19.29410483
23/03/2005 17:00:00	17.4101415	18.83659322
23/03/2005 18:00:00	16.32665327	18.00575451
23/03/2005 19:00:00	14.96063257	16.87387213
23/03/2005 20:00:00	13.38861968	15.5132295
23/03/2005 21:00:00	11.68715491	13.99611006
23/03/2005 22:00:00	9.932778552	12.39479725
23/03/2005 23:00:00	8.202030909	10.78157448
24/03/2005 00:00:00	6.571452277	9.228725197
24/03/2005 01:00:00	5.117582955	7.808532829
24/03/2005 02:00:00	3.916963242	6.593280807
24/03/2005 03:00:00	3.046133434	5.655252562
24/03/2005 04:00:00	2.581633832	5.066731527
24/03/2005 05:00:00	2.600004732	4.900001132
24/03/2005 06:00:00	3.145653799	5.197567403
24/03/2005 07:00:00	4.134464554	5.882832667
24/03/2005 08:00:00	5.450191082	6.849424805
24/03/2005 09:00:00	6.976587467	7.990971701
24/03/2005 10:00:00	8.597407793	9.201101237
24/03/2005 11:00:00	10.19640614	10.3734413
24/03/2005 12:00:00	11.65733661	11.40161976
24/03/2005 13:00:00	12.86395326	12.17926452
24/03/2005 14:00:00	13.70001019	12.60000345
24/03/2005 15:00:00	14.07950691	12.58642894
24/03/2005 16:00:00	14.03741856	12.17698564
24/03/2005 17:00:00	13.63896268	11.43907983
24/03/2005 18:00:00	12.94935681	10.44011776
24/03/2005 19:00:00	12.03381851	9.247505704
24/03/2005 20:00:00	10.9575653	7.928649923
24/03/2005 21:00:00	9.785814749	6.550956683
24/03/2005 22:00:00	8.583784385	5.18183225
24/03/2005 23:00:00	7.416691756	3.888682889
25/03/2005 00:00:00	6.349754405	2.738914866
25/03/2005 01:00:00	5.448189876	1.799934446
25/03/2005 02:00:00	4.777215712	1.139147895
25/03/2005 03:00:00	4.402049458	0.823961478
25/03/2005 04:00:00	4.387908658	0.92178146
25/03/2005 05:00:00	4.800010853	1.500014107
25/03/2005 06:00:00	5.675107643	2.595413156
[truncated: 6,761 more rows]
