# Supplementary material for: Flood Prediction in Ungauged Basins by Physical-Based TOPKAPI Model
Source: Hindawi journal article supplement (doi:10.1155/2019/4795853), 2019-09-05
Supplement: f1 [file 4795853.f1.zip › 4795853.f1/xxdtemp_2006.csv]

time	57290	57297
01/01/2006 00:00:00	-21.32822542	-17.17688754
01/01/2006 01:00:00	-15.80104821	-12.32731736
01/01/2006 02:00:00	-10.92957248	-8.088538015
01/01/2006 03:00:00	-6.678862569	-4.42685481
01/01/2006 04:00:00	-3.013982831	-1.308573042
01/01/2006 05:00:00	0.100002394	1.300001987
01/01/2006 06:00:00	2.698028763	3.432564977
01/01/2006 07:00:00	4.815031933	5.122810629
01/01/2006 08:00:00	6.485947558	6.404433643
01/01/2006 09:00:00	7.745711297	7.311128717
01/01/2006 10:00:00	8.629258805	7.876590552
01/01/2006 11:00:00	9.171525738	8.134513847
01/01/2006 12:00:00	9.407447753	8.118593303
01/01/2006 13:00:00	9.371960507	7.862523619
01/01/2006 14:00:00	9.099999655	7.399999494
01/01/2006 15:00:00	8.626500854	6.76471563
01/01/2006 16:00:00	7.98639976	5.990366724
01/01/2006 17:00:00	7.21463203	5.110647478
01/01/2006 18:00:00	6.34613332	4.159252591
01/01/2006 19:00:00	5.415839286	3.169876763
01/01/2006 20:00:00	4.458685585	2.176214693
01/01/2006 21:00:00	3.509607874	1.211961082
01/01/2006 22:00:00	2.603541807	0.310810628
01/01/2006 23:00:00	1.775423042	-0.493541967
02/01/2006 00:00:00	1.060187235	-1.167402005
02/01/2006 01:00:00	0.492770043	-1.677074785
02/01/2006 02:00:00	0.108107122	-1.988865608
02/01/2006 03:00:00	-0.058865873	-2.069079773
02/01/2006 04:00:00	0.026786717	-1.884022582
02/01/2006 05:00:00	0.400000546	-1.399999335
02/01/2006 06:00:00	1.077928556	-0.601105924
02/01/2006 07:00:00	2.006593049	0.4573996
02/01/2006 08:00:00	3.114233723	1.702468706
02/01/2006 09:00:00	4.329090273	3.061052862
02/01/2006 10:00:00	5.579402398	4.460103534
02/01/2006 11:00:00	6.793409794	5.826572192
02/01/2006 12:00:00	7.899352158	7.087410302
02/01/2006 13:00:00	8.825469188	8.169569332
02/01/2006 14:00:00	9.500000579	9.000000751
02/01/2006 15:00:00	9.869517735	9.523914998
02/01/2006 16:00:00	9.95391863	9.759558165
02/01/2006 17:00:00	9.791432824	9.743435194
02/01/2006 18:00:00	9.420289877	9.512051027
02/01/2006 19:00:00	8.878719346	9.101910608
02/01/2006 20:00:00	8.204950791	8.549518879
02/01/2006 21:00:00	7.437213771	7.891380782
02/01/2006 22:00:00	6.613737846	7.16400126
02/01/2006 23:00:00	5.772752574	6.403885257
03/01/2006 00:00:00	4.952487515	5.647537714
03/01/2006 01:00:00	4.191172227	4.931463573
03/01/2006 02:00:00	3.527036269	4.292167779
03/01/2006 03:00:00	2.998309201	3.766155273
03/01/2006 04:00:00	2.643220582	3.389930998
03/01/2006 05:00:00	2.49999997	3.199999896
03/01/2006 06:00:00	2.591440727	3.218741861
03/01/2006 07:00:00	2.878591644	3.412036787
03/01/2006 08:00:00	3.307065431	3.731639624
03/01/2006 09:00:00	3.822474794	4.129305322
03/01/2006 10:00:00	4.370432442	4.556788831
03/01/2006 11:00:00	4.896551082	4.965845099
03/01/2006 12:00:00	5.346443421	5.308229077
03/01/2006 13:00:00	5.665722168	5.535695713
03/01/2006 14:00:00	5.800000031	5.599999957
03/01/2006 15:00:00	5.70945845	5.46596986
03/01/2006 16:00:00	5.412553574	5.150725677
03/01/2006 17:00:00	4.942310172	4.684460662
03/01/2006 18:00:00	4.331753013	4.09736807
03/01/2006 19:00:00	3.613906866	3.419641155
03/01/2006 20:00:00	2.8217965	2.681473172
03/01/2006 21:00:00	1.988446683	1.913057376
03/01/2006 22:00:00	1.146882186	1.144587021
03/01/2006 23:00:00	0.330127775	0.406255362
04/01/2006 00:00:00	-0.428791779	-0.271744347
04/01/2006 01:00:00	-1.096851707	-0.859218851
04/01/2006 02:00:00	-1.641027242	-1.325974896
04/01/2006 03:00:00	-2.028293613	-1.641819227
04/01/2006 04:00:00	-2.225626052	-1.776558589
04/01/2006 05:00:00	-2.19999979	-1.699999728
04/01/2006 06:00:00	-1.933496926	-1.396050042
04/01/2006 07:00:00	-1.468626771	-0.905019298
04/01/2006 08:00:00	-0.863005377	-0.281317798
04/01/2006 09:00:00	-0.174248794	0.420644157
04/01/2006 10:00:00	0.540026928	1.146456267
04/01/2006 11:00:00	1.222205736	1.841708232
04/01/2006 12:00:00	1.814671581	2.451989749
04/01/2006 13:00:00	2.259808411	2.922890519
04/01/2006 14:00:00	2.500000176	3.200000241
04/01/2006 15:00:00	2.492969984	3.24321898
04/01/2006 16:00:00	2.257797304	3.06968801
04/01/2006 17:00:00	1.82890063	2.710858843
04/01/2006 18:00:00	1.240698452	2.198182992
04/01/2006 19:00:00	0.527609265	1.563111969
04/01/2006 20:00:00	-0.275948442	0.837097285
04/01/2006 21:00:00	-1.135556174	0.051590454
04/01/2006 22:00:00	-2.016795441	-0.761957012
04/01/2006 23:00:00	-2.885247749	-1.572093601
05/01/2006 00:00:00	-3.706494607	-2.347367802
05/01/2006 01:00:00	-4.446117523	-3.0563281
05/01/2006 02:00:00	-5.069698004	-3.667522986
05/01/2006 03:00:00	-5.542817558	-4.149500945
05/01/2006 04:00:00	-5.831057693	-4.470810466
05/01/2006 05:00:00	-5.899999916	-4.600000036
05/01/2006 06:00:00	-5.729803271	-4.518885953
05/01/2006 07:00:00	-5.358936654	-4.26235549
05/01/2006 08:00:00	-4.840446359	-3.878563605
05/01/2006 09:00:00	-4.227378677	-3.415665252
05/01/2006 10:00:00	-3.5727799	-2.921815388
05/01/2006 11:00:00	-2.929696321	-2.445168968
05/01/2006 12:00:00	-2.35117423	-2.033880949
05/01/2006 13:00:00	-1.890259921	-1.736106286
05/01/2006 14:00:00	-1.599999685	-1.599999934
05/01/2006 15:00:00	-1.519159432	-1.660234128
05/01/2006 16:00:00	-1.629383829	-1.897550485
05/01/2006 17:00:00	-1.898037304	-2.279208036
05/01/2006 18:00:00	-2.292484285	-2.772465811
05/01/2006 19:00:00	-2.780089202	-3.344582841
05/01/2006 20:00:00	-3.328216483	-3.962818157
05/01/2006 21:00:00	-3.904230557	-4.59443079
05/01/2006 22:00:00	-4.475495851	-5.206679771
05/01/2006 23:00:00	-5.009376795	-5.76682413
06/01/2006 00:00:00	-5.473237817	-6.242122899
06/01/2006 01:00:00	-5.834443345	-6.599835108
06/01/2006 02:00:00	-6.060357809	-6.807219789
06/01/2006 03:00:00	-6.118345635	-6.831535971
06/01/2006 04:00:00	-5.975771254	-6.640042686
06/01/2006 05:00:00	-5.599999094	-6.199998965
06/01/2006 06:00:00	-4.974526334	-5.495738575
06/01/2006 07:00:00	-4.14738081	-4.579893863
06/01/2006 08:00:00	-3.182722936	-3.522171731
06/01/2006 09:00:00	-2.144713123	-2.392279076
06/01/2006 10:00:00	-1.097511786	-1.2599228
06/01/2006 11:00:00	-0.105279336	-0.194809801
06/01/2006 12:00:00	0.767823813	0.73335302
06/01/2006 13:00:00	1.457637248	1.454858764
06/01/2006 14:00:00	1.900000556	1.900000531
06/01/2006 15:00:00	2.048557166	2.018830708
06/01/2006 16:00:00	1.928165466	1.840438385
06/01/2006 17:00:00	1.581487486	1.413671717
06/01/2006 18:00:00	1.051185257	0.787378858
06/01/2006 19:00:00	0.379920809	0.010407965
06/01/2006 20:00:00	-0.38964383	-0.868392809
06/01/2006 21:00:00	-1.214846628	-1.800175309
06/01/2006 22:00:00	-2.053025555	-2.736091379
06/01/2006 23:00:00	-2.861518582	-3.627292864
07/01/2006 00:00:00	-3.597663679	-4.42493161
07/01/2006 01:00:00	-4.218798816	-5.080159462
07/01/2006 02:00:00	-4.682261962	-5.544128265
07/01/2006 03:00:00	-4.945391088	-5.767989863
07/01/2006 04:00:00	-4.965524163	-5.702896103
07/01/2006 05:00:00	-4.699999158	-5.299998828
07/01/2006 06:00:00	-4.125610352	-4.533614864
07/01/2006 07:00:00	-3.296976792	-3.470720391
07/01/2006 08:00:00	-2.288173603	-2.201456295
07/01/2006 09:00:00	-1.173275909	-0.81596346
07/01/2006 10:00:00	-0.026358835	0.595617231
07/01/2006 11:00:00	1.078502495	1.943144893
07/01/2006 12:00:00	2.067232957	3.136478641
07/01/2006 13:00:00	2.865757426	4.085477592
07/01/2006 14:00:00	3.400000779	4.700000861
07/01/2006 15:00:00	3.615790574	4.914564014
07/01/2006 16:00:00	3.538564611	4.762307799
07/01/2006 17:00:00	3.213663127	4.301029111
07/01/2006 18:00:00	2.686426358	3.588524844
07/01/2006 19:00:00	2.002194542	2.68259189
07/01/2006 20:00:00	1.206307916	1.641027143
07/01/2006 21:00:00	0.344106716	0.521627498
07/01/2006 22:00:00	-0.539068821	-0.617810153
07/01/2006 23:00:00	-1.397878458	-1.719488915
08/01/2006 00:00:00	-2.186981958	-2.725611896
08/01/2006 01:00:00	-2.861039085	-3.578382202
08/01/2006 02:00:00	-3.374709602	-4.220002938
08/01/2006 03:00:00	-3.682653271	-4.592677212
08/01/2006 04:00:00	-3.739529856	-4.63860813
08/01/2006 05:00:00	-3.49999912	-4.299998798
08/01/2006 06:00:00	-2.939125946	-3.545236677
08/01/2006 07:00:00	-2.113595157	-2.447445955
08/01/2006 08:00:00	-1.100496429	-1.105934833
08/01/2006 09:00:00	0.023080561	0.379988491
08/01/2006 10:00:00	1.180046139	1.911015817
08/01/2006 11:00:00	2.293310627	3.387838946
08/01/2006 12:00:00	3.285784352	4.711149677
08/01/2006 13:00:00	4.080377636	5.781639811
08/01/2006 14:00:00	4.600000804	6.500001149
08/01/2006 15:00:00	4.788993367	6.793921102
08/01/2006 16:00:00	4.677411	6.699068795
08/01/2006 17:00:00	4.316738276	6.278108599
08/01/2006 18:00:00	3.758459767	5.593704885
08/01/2006 19:00:00	3.054060046	4.708522023
08/01/2006 20:00:00	2.255023684	3.685224385
08/01/2006 21:00:00	1.412835255	2.586476341
08/01/2006 22:00:00	0.57897933	1.474942262
08/01/2006 23:00:00	-0.195059517	0.413286518
09/01/2006 00:00:00	-0.857796716	-0.535826519
09/01/2006 01:00:00	-1.357747693	-1.309732478
09/01/2006 02:00:00	-1.643427876	-1.84576699
09/01/2006 03:00:00	-1.663352693	-2.081265683
09/01/2006 04:00:00	-1.366037571	-1.953564186
09/01/2006 05:00:00	-0.699997939	-1.399998129
09/01/2006 06:00:00	0.36021232	-0.387101709
09/01/2006 07:00:00	1.735886232	1.001797437
09/01/2006 08:00:00	3.322278738	2.654173521
09/01/2006 09:00:00	5.014644782	4.457500753
09/01/2006 10:00:00	6.708239303	6.299253346
09/01/2006 11:00:00	8.298317244	8.066905508
09/01/2006 12:00:00	9.680133545	9.647931453
09/01/2006 13:00:00	10.74894315	10.92980539
09/01/2006 14:00:00	11.400001	11.80000153
09/01/2006 15:00:00	11.55786326	12.17653236
09/01/2006 16:00:00	11.26429019	12.09956248
09/01/2006 17:00:00	10.59034283	11.63979436
09/01/2006 18:00:00	9.607082234	10.86793042
09/01/2006 19:00:00	8.385569442	9.854673114
09/01/2006 20:00:00	6.996865505	8.670724879
09/01/2006 21:00:00	5.512031471	7.386788158
09/01/2006 22:00:00	4.002128387	6.073565391
09/01/2006 23:00:00	2.538217303	4.801759021
10/01/2006 00:00:00	1.191359264	3.642071488
10/01/2006 01:00:00	0.032615321	2.665205235
10/01/2006 02:00:00	-0.86695348	1.941862702
10/01/2006 03:00:00	-1.436286091	1.542746332
10/01/2006 04:00:00	-1.604321464	1.538558565
10/01/2006 05:00:00	-1.299998551	2.000001843
10/01/2006 06:00:00	-0.483971339	2.965306109
10/01/2006 07:00:00	0.756247026	4.342812309
10/01/2006 08:00:00	2.301428851	6.008389388
10/01/2006 09:00:00	4.032346442	7.837906294
10/01/2006 10:00:00	5.829772107	9.707231974
10/01/2006 11:00:00	7.574478154	11.49223537
10/01/2006 12:00:00	9.147236889	13.06878544
10/01/2006 13:00:00	10.42882062	14.31275112
10/01/2006 14:00:00	11.30000165	15.10000137
10/01/2006 15:00:00	11.67229488	15.33929609
10/01/2006 16:00:00	11.58018452	15.07095807
10/01/2006 17:00:00	11.0888969	14.36820052
10/01/2006 18:00:00	10.26365834	13.30423666
10/01/2006 19:00:00	9.169695162	11.95227973
10/01/2006 20:00:00	7.872233688	10.38554295
10/01/2006 21:00:00	6.436500238	8.677239525
10/01/2006 22:00:00	4.927721133	6.900582694
10/01/2006 23:00:00	3.411122696	5.128785675
11/01/2006 00:00:00	1.951931246	3.435061692
11/01/2006 01:00:00	0.615373105	1.892623968
11/01/2006 02:00:00	-0.533325406	0.574685725
11/01/2006 03:00:00	-1.428937966	-0.445539814
11/01/2006 04:00:00	-2.006238252	-1.094839425
11/01/2006 05:00:00	-2.199999945	-1.299999886
11/01/2006 06:00:00	-1.970206406	-1.016367851
11/01/2006 07:00:00	-1.377678887	-0.313528539
11/01/2006 08:00:00	-0.508447907	0.710373427
11/01/2006 09:00:00	0.551456016	1.957193424
11/01/2006 10:00:00	1.716002363	3.328786828
11/01/2006 11:00:00	2.899160615	4.727009015
11/01/2006 12:00:00	4.014900256	6.053715363
11/01/2006 13:00:00	4.977190766	7.210761248
11/01/2006 14:00:00	5.700001627	8.100002046
11/01/2006 15:00:00	6.118219863	8.646474457
11/01/2006 16:00:00	6.250401958	8.867939677
11/01/2006 17:00:00	6.136021582	8.805339828
11/01/2006 18:00:00	5.814552406	8.499617037
11/01/2006 19:00:00	5.325468099	7.991713425
11/01/2006 20:00:00	4.708242334	7.322571119
11/01/2006 21:00:00	4.002348779	6.53313224
11/01/2006 22:00:00	3.247261106	5.664338915
11/01/2006 23:00:00	2.482452984	4.757133266
12/01/2006 00:00:00	1.747398085	3.852457417
12/01/2006 01:00:00	1.081570079	2.991253494
12/01/2006 02:00:00	0.524442636	2.214463619
12/01/2006 03:00:00	0.115489427	1.563029916
12/01/2006 04:00:00	-0.105815878	1.077894511
12/01/2006 05:00:00	-0.099999609	0.799999526
12/01/2006 06:00:00	0.155970113	0.755636472
12/01/2006 07:00:00	0.619358573	0.912494921
12/01/2006 08:00:00	1.230989557	1.223614093
12/01/2006 09:00:00	1.931686849	1.642033205
12/01/2006 10:00:00	2.662274235	2.120791476
12/01/2006 11:00:00	3.363575499	2.612928125
12/01/2006 12:00:00	3.976414426	3.071482369
12/01/2006 13:00:00	4.441614801	3.449493427
12/01/2006 14:00:00	4.700000409	3.700000517
12/01/2006 15:00:00	4.708508301	3.78779887
12/01/2006 16:00:00	4.488528013	3.724707332
12/01/2006 17:00:00	4.077562051	3.534300547
12/01/2006 18:00:00	3.513112925	3.240153161
12/01/2006 19:00:00	2.832683143	2.865839819
12/01/2006 20:00:00	2.073775215	2.434935165
12/01/2006 21:00:00	1.273891647	1.971013844
12/01/2006 22:00:00	0.47053495	1.497650501
12/01/2006 23:00:00	-0.298792369	1.038419781
13/01/2006 00:00:00	-0.996587801	0.616896329
13/01/2006 01:00:00	-1.585348837	0.256654788
13/01/2006 02:00:00	-2.027572969	-0.018730194
13/01/2006 03:00:00	-2.285757688	-0.185683975
13/01/2006 04:00:00	-2.322400486	-0.220631909
13/01/2006 05:00:00	-2.099998854	-0.099999351
13/01/2006 06:00:00	-1.59853538	0.18912072
13/01/2006 07:00:00	-0.867932375	0.616965241
13/01/2006 08:00:00	0.024403083	1.143103724
13/01/2006 09:00:00	1.011063915	1.727105682
13/01/2006 10:00:00	2.024643045	2.32854063
13/01/2006 11:00:00	2.997733394	2.90697808
13/01/2006 12:00:00	3.862927883	3.421987547
13/01/2006 13:00:00	4.552819437	3.833138543
13/01/2006 14:00:00	5.000000976	4.100000583
13/01/2006 15:00:00	5.155303895	4.193137197
13/01/2006 16:00:00	5.042512778	4.127087562
13/01/2006 17:00:00	4.703650328	3.927384662
13/01/2006 18:00:00	4.18073925	3.61956148
13/01/2006 19:00:00	3.515802248	3.229150998
13/01/2006 20:00:00	2.750862025	2.781686199
13/01/2006 21:00:00	1.927941286	2.302700067
13/01/2006 22:00:00	1.089062735	1.817725584
13/01/2006 23:00:00	0.276249075	1.352295733
14/01/2006 00:00:00	-0.468476989	0.931943497
14/01/2006 01:00:00	-1.103092754	0.582201859
14/01/2006 02:00:00	-1.585575515	0.328603801
14/01/2006 03:00:00	-1.873902568	0.196682308
14/01/2006 04:00:00	-1.926051209	0.211970361
14/01/2006 05:00:00	-1.699998735	0.400000944
14/01/2006 06:00:00	-1.173046713	0.773716211
14/01/2006 07:00:00	-0.399793026	1.295695509
14/01/2006 08:00:00	0.545840558	1.915927607
14/01/2006 09:00:00	1.589932272	2.584401277
14/01/2006 10:00:00	2.658560348	3.251105287
14/01/2006 11:00:00	3.677803017	3.866028409
14/01/2006 12:00:00	4.573738513	4.379159412
14/01/2006 13:00:00	5.272445067	4.740487067
14/01/2006 14:00:00	5.700000911	4.900000143
14/01/2006 15:00:00	5.803015304	4.822482424
14/01/2006 16:00:00	5.610220767	4.531897138
14/01/2006 17:00:00	5.170880427	4.067002226
14/01/2006 18:00:00	4.534257413	3.466555625
14/01/2006 19:00:00	3.749614852	2.769315275
14/01/2006 20:00:00	2.866215872	2.014039115
14/01/2006 21:00:00	1.933323599	1.239485085
14/01/2006 22:00:00	1.000201163	0.484411123
14/01/2006 23:00:00	0.11611169	-0.21242483
15/01/2006 00:00:00	-0.669681691	-0.812264837
15/01/2006 01:00:00	-1.307915854	-1.276350958
15/01/2006 02:00:00	-1.749327671	-1.565925253
15/01/2006 03:00:00	-1.944654013	-1.642229784
15/01/2006 04:00:00	-1.844631754	-1.466506611
15/01/2006 05:00:00	-1.399997765	-0.999997796
15/01/2006 06:00:00	-0.584174524	-0.222983977
15/01/2006 07:00:00	0.53867404	0.808100695
15/01/2006 08:00:00	1.88169887	2.017783894
15/01/2006 09:00:00	3.358050912	3.330593295
15/01/2006 10:00:00	4.880881111	4.671056572
15/01/2006 11:00:00	6.363340413	5.963701399
15/01/2006 12:00:00	7.718579761	7.133055451
15/01/2006 13:00:00	8.859750101	8.1036464
15/01/2006 14:00:00	9.700002379	8.800001923
15/01/2006 15:00:00	10.17461035	9.166526662
15/01/2006 16:00:00	10.30733807	9.227132287
15/01/2006 17:00:00	10.14407191	9.025607005
15/01/2006 18:00:00	9.730698272	8.605739025
15/01/2006 19:00:00	9.113103529	8.011316555
15/01/2006 20:00:00	8.337174067	7.286127803
15/01/2006 21:00:00	7.448796272	6.47396098
15/01/2006 22:00:00	6.493856528	5.618604292
15/01/2006 23:00:00	5.518241218	4.763845949
16/01/2006 00:00:00	4.567836729	3.953474158
16/01/2006 01:00:00	3.688529443	3.231277129
16/01/2006 02:00:00	2.926205745	2.64104307
16/01/2006 03:00:00	2.32675202	2.22656019
16/01/2006 04:00:00	1.936054651	2.031616696
16/01/2006 05:00:00	1.800000024	2.100000798
16/01/2006 06:00:00	1.946496726	2.4574069
16/01/2006 07:00:00	2.331542954	3.057154996
16/01/2006 08:00:00	2.893159513	3.834471679
16/01/2006 09:00:00	3.569367205	4.724583542
16/01/2006 10:00:00	4.298186833	5.66271718
16/01/2006 11:00:00	5.0176392	6.584099186
16/01/2006 12:00:00	5.665745108	7.423956154
16/01/2006 13:00:00	6.180525362	8.117514677
16/01/2006 14:00:00	6.500000763	8.600001348
16/01/2006 15:00:00	6.578307932	8.823128043
16/01/2006 16:00:00	6.434046024	8.804547019
16/01/2006 17:00:00	6.101929645	8.578395437
16/01/2006 18:00:00	5.616673401	8.17881046
16/01/2006 19:00:00	5.012991899	7.639929252
16/01/2006 20:00:00	4.325599744	6.995888975
16/01/2006 21:00:00	3.589211542	6.280826792
16/01/2006 22:00:00	2.8385419	5.528879865
16/01/2006 23:00:00	2.108305423	4.774185357
17/01/2006 00:00:00	1.433216717	4.050880431
17/01/2006 01:00:00	0.847990388	3.39310225
17/01/2006 02:00:00	0.387341043	2.834987976
17/01/2006 03:00:00	0.085983287	2.410674773
17/01/2006 04:00:00	-0.021368273	2.154299802
17/01/2006 05:00:00	0.100000967	2.100000227
17/01/2006 06:00:00	0.469287389	2.267870091
17/01/2006 07:00:00	1.043615193	2.621831611
17/01/2006 08:00:00	1.764590718	3.111764216
17/01/2006 09:00:00	2.573820304	3.687547335
17/01/2006 10:00:00	3.412910289	4.299060395
17/01/2006 11:00:00	4.223467013	4.896182825
17/01/2006 12:00:00	4.947096815	5.428794053
17/01/2006 13:00:00	5.525406034	5.846773506
17/01/2006 14:00:00	5.900001009	6.100000614
17/01/2006 15:00:00	6.027431793	6.151200536
17/01/2006 16:00:00	5.924022582	6.014480749
17/01/2006 17:00:00	5.621040927	5.716794153
17/01/2006 18:00:00	5.14975438	5.285093649
17/01/2006 19:00:00	4.541430493	4.746332138
17/01/2006 20:00:00	3.827336818	4.127462521
17/01/2006 21:00:00	3.038740907	3.455437698
17/01/2006 22:00:00	2.206910311	2.757210572
17/01/2006 23:00:00	1.363112583	2.059734042
18/01/2006 00:00:00	0.538615275	1.389961011
18/01/2006 01:00:00	-0.235314062	0.774844377
18/01/2006 02:00:00	-0.927407876	0.241337044
18/01/2006 03:00:00	-1.506398615	-0.18360809
18/01/2006 04:00:00	-1.941018727	-0.473038121
18/01/2006 05:00:00	-2.20000066	-0.600000151
18/01/2006 06:00:00	-2.263506377	-0.548399599
18/01/2006 07:00:00	-2.157415338	-0.345574637
18/01/2006 08:00:00	-1.919036238	-0.029721493
18/01/2006 09:00:00	-1.585677771	0.360963606
18/01/2006 10:00:00	-1.19464863	0.788284435
18/01/2006 11:00:00	-0.783257508	1.214044766
18/01/2006 12:00:00	-0.388813101	1.600048372
18/01/2006 13:00:00	-0.048624102	1.908099028
18/01/2006 14:00:00	0.200000795	2.100000506
18/01/2006 15:00:00	0.328472474	2.147196044
18/01/2006 16:00:00	0.343079691	2.059686255
18/01/2006 17:00:00	0.25883056	1.857110978
18/01/2006 18:00:00	0.090733197	1.559110048
18/01/2006 19:00:00	-0.146204283	1.185323302
18/01/2006 20:00:00	-0.436973766	0.755390576
18/01/2006 21:00:00	-0.766567135	0.288951709
18/01/2006 22:00:00	-1.119976277	-0.194353464
18/01/2006 23:00:00	-1.482193076	-0.674885105
19/01/2006 00:00:00	-1.838209418	-1.133003378
19/01/2006 01:00:00	-2.173017186	-1.549068446
19/01/2006 02:00:00	-2.471608267	-1.903440473
19/01/2006 03:00:00	-2.718974545	-2.176479621
19/01/2006 04:00:00	-2.900107906	-2.348546053
19/01/2006 05:00:00	-3.000000233	-2.399999934
19/01/2006 06:00:00	-3.009313099	-2.319301728
19/01/2006 07:00:00	-2.941386529	-2.127312691
19/01/2006 08:00:00	-2.815230088	-1.852994173
19/01/2006 09:00:00	-2.649853342	-1.525307524
19/01/2006 10:00:00	-2.464265855	-1.173214093
19/01/2006 11:00:00	-2.277477194	-0.82567523
19/01/2006 12:00:00	-2.108496924	-0.511652284
19/01/2006 13:00:00	-1.976334609	-0.260106605
19/01/2006 14:00:00	-1.899999816	-0.099999543
19/01/2006 15:00:00	-1.893352185	-0.052836134
19/01/2006 16:00:00	-1.949651922	-0.110296559
19/01/2006 17:00:00	-2.057009445	-0.256604882
19/01/2006 18:00:00	-2.203535172	-0.475985164
19/01/2006 19:00:00	-2.377339518	-0.752661469
19/01/2006 20:00:00	-2.566532902	-1.07085786
19/01/2006 21:00:00	-2.75922574	-1.414798401
19/01/2006 22:00:00	-2.94352845	-1.768707154
19/01/2006 23:00:00	-3.107551448	-2.116808182
20/01/2006 00:00:00	-3.239405151	-2.443325549
20/01/2006 01:00:00	-3.327199977	-2.732483318
20/01/2006 02:00:00	-3.359046342	-2.968505551
20/01/2006 03:00:00	-3.323054664	-3.135616312
20/01/2006 04:00:00	-3.20733536	-3.218039664
20/01/2006 05:00:00	-2.999998846	-3.19999967
20/01/2006 06:00:00	-2.696769604	-3.073383367
20/01/2006 07:00:00	-2.323827961	-2.860729273
20/01/2006 08:00:00	-1.914968102	-2.592238673
20/01/2006 09:00:00	-1.503984213	-2.298112855
20/01/2006 10:00:00	-1.12467048	-2.008553102
20/01/2006 11:00:00	-0.810821089	-1.753760702
20/01/2006 12:00:00	-0.596230224	-1.56393694
20/01/2006 13:00:00	-0.514692073	-1.469283101
20/01/2006 14:00:00	-0.600000821	-1.500000472
20/01/2006 15:00:00	-0.874548638	-1.676618456
20/01/2006 16:00:00	-1.315120259	-1.98097946
20/01/2006 17:00:00	-1.887098715	-2.385254274
20/01/2006 18:00:00	-2.555867037	-2.861613689
20/01/2006 19:00:00	-3.286808257	-3.382228493
20/01/2006 20:00:00	-4.045305406	-3.919269477
20/01/2006 21:00:00	-4.796741515	-4.444907431
20/01/2006 22:00:00	-5.506499615	-4.931313144
20/01/2006 23:00:00	-6.139962738	-5.350657407
21/01/2006 00:00:00	-6.662513915	-5.675111009
21/01/2006 01:00:00	-7.039536177	-5.87684474
21/01/2006 02:00:00	-7.236412555	-5.92802939
21/01/2006 03:00:00	-7.218526081	-5.800835749
21/01/2006 04:00:00	-6.951259786	-5.467434607
21/01/2006 05:00:00	-6.399996701	-4.899996753
21/01/2006 06:00:00	-5.549534401	-4.086647106
21/01/2006 07:00:00	-4.462327541	-3.0793262
21/01/2006 08:00:00	-3.220244776	-1.945928249
21/01/2006 09:00:00	-1.905154759	-0.754347465
21/01/2006 10:00:00	-0.598926143	0.427521935
21/01/2006 11:00:00	0.616572416	1.531785739
21/01/2006 12:00:00	1.659472265	2.490549732
21/01/2006 13:00:00	2.447904751	3.2359197
21/01/2006 14:00:00	2.90000122	3.700001429
21/01/2006 15:00:00	2.95716727	3.833941383
21/01/2006 16:00:00	2.65390419	3.665047642
21/01/2006 17:00:00	2.047986857	3.239668425
21/01/2006 18:00:00	1.197190147	2.604151946
21/01/2006 19:00:00	0.159288938	1.804846424
21/01/2006 20:00:00	-1.007941894	0.888100073
21/01/2006 21:00:00	-2.24672747	-0.09973889
21/01/2006 22:00:00	-3.499292914	-1.112322248
21/01/2006 23:00:00	-4.707863349	-2.103301785
22/01/2006 00:00:00	-5.814663898	-3.026329285
22/01/2006 01:00:00	-6.761919683	-3.83505653
22/01/2006 02:00:00	-7.491855827	-4.483135306
22/01/2006 03:00:00	-7.946697454	-4.924217395
22/01/2006 04:00:00	-8.068669686	-5.111954582
22/01/2006 05:00:00	-7.799997646	-4.999998649
22/01/2006 06:00:00	-7.109010904	-4.562222836
22/01/2006 07:00:00	-6.068455296	-3.853385017
22/01/2006 08:00:00	-4.777180342	-2.948463933
22/01/2006 09:00:00	-3.334035561	-1.922438322
22/01/2006 10:00:00	-1.837870473	-0.850286924
22/01/2006 11:00:00	-0.387534599	0.193011522
22/01/2006 12:00:00	0.918122543	1.132478277
22/01/2006 13:00:00	1.980251433	1.893134601
22/01/2006 14:00:00	2.700002549	2.400001755
22/01/2006 15:00:00	3.004721326	2.59799379
22/01/2006 16:00:00	2.926531448	2.511594734
22/01/2006 17:00:00	2.523750777	2.185180818
22/01/2006 18:00:00	1.854697175	1.66312827
22/01/2006 19:00:00	0.977688501	0.989813319
22/01/2006 20:00:00	-0.048957382	0.209612196
22/01/2006 21:00:00	-1.166922614	-0.633098872
22/01/2006 22:00:00	-2.317889333	-1.493943655
22/01/2006 23:00:00	-3.443539678	-2.328545923
23/01/2006 00:00:00	-4.485555789	-3.092529447
23/01/2006 01:00:00	-5.385619803	-3.741517999
23/01/2006 02:00:00	-6.085413861	-4.231135349
23/01/2006 03:00:00	-6.526620101	-4.517005267
23/01/2006 04:00:00	-6.650920661	-4.554751526
23/01/2006 05:00:00	-6.399997681	-4.299997894
23/01/2006 06:00:00	-5.740863974	-3.727678906
23/01/2006 07:00:00	-4.741853515	-2.889970962
23/01/2006 08:00:00	-3.496630182	-1.858360643
23/01/2006 09:00:00	-2.098857856	-0.704334524
23/01/2006 10:00:00	-0.642200415	0.500620817
23/01/2006 11:00:00	0.779678262	1.685018801
23/01/2006 12:00:00	2.073114294	2.77737285
23/01/2006 13:00:00	3.144443803	3.706196389
23/01/2006 14:00:00	3.900002909	4.400002837
23/01/2006 15:00:00	4.270143041	4.805352049
23/01/2006 16:00:00	4.281275377	4.940988482
23/01/2006 17:00:00	3.983825662	4.843702469
23/01/2006 18:00:00	3.428219641	4.550284342
23/01/2006 19:00:00	2.664883062	4.097524434
23/01/2006 20:00:00	1.744241668	3.522213077
23/01/2006 21:00:00	0.716721206	2.861140603
23/01/2006 22:00:00	-0.367252579	2.151097344
23/01/2006 23:00:00	-1.457253942	1.428873634
24/01/2006 00:00:00	-2.502857136	0.731259804
24/01/2006 01:00:00	-3.453636416	0.095046187
24/01/2006 02:00:00	-4.259166037	-0.442976885
24/01/2006 03:00:00	-4.869020252	-0.84601908
24/01/2006 04:00:00	-5.232773317	-1.077290064
24/01/2006 05:00:00	-5.299999486	-1.099999507
24/01/2006 06:00:00	-5.040793083	-0.89237963
24/01/2006 07:00:00	-4.507327423	-0.492751927
24/01/2006 08:00:00	-3.772295243	0.045540025
24/01/2006 09:00:00	-2.90838928	0.669152652
24/01/2006 10:00:00	-1.988302272	1.324742377
24/01/2006 11:00:00	-1.084726955	1.958965626
24/01/2006 12:00:00	-0.270356067	2.518478822
24/01/2006 13:00:00	0.382117654	2.94993839
24/01/2006 14:00:00	0.800001472	3.200000754
24/01/2006 15:00:00	0.929895854	3.229778959
24/01/2006 16:00:00	0.795572852	3.0582116
24/01/2006 17:00:00	0.440097104	2.718693429
24/01/2006 18:00:00	-0.093466749	2.244619199
24/01/2006 19:00:00	-0.762054069	1.669383663
24/01/2006 20:00:00	-1.522600215	1.026381574
24/01/2006 21:00:00	-2.332040548	0.349007684
24/01/2006 22:00:00	-3.147310429	-0.329343255
24/01/2006 23:00:00	-3.925345218	-0.975276488
25/01/2006 00:00:00	-4.623080275	-1.555397265
25/01/2006 01:00:00	-5.197450962	-2.036310831
25/01/2006 02:00:00	-5.605392638	-2.384622435
25/01/2006 03:00:00	-5.803840665	-2.566937324
25/01/2006 04:00:00	-5.749730403	-2.549860744
25/01/2006 05:00:00	-5.399997211	-2.299997944
25/01/2006 06:00:00	-4.732092932	-1.80046234
25/01/2006 07:00:00	-3.805533988	-1.100398948
25/01/2006 08:00:00	-2.70035261	-0.265460414
25/01/2006 09:00:00	-1.496581031	0.638700618
25/01/2006 10:00:00	-0.274251482	1.5464315
25/01/2006 11:00:00	0.886603803	2.392079588
25/01/2006 12:00:00	1.905952593	3.109992236
25/01/2006 13:00:00	2.703762656	3.634516799
25/01/2006 14:00:00	3.20000176	3.90000063
25/01/2006 15:00:00	3.337057825	3.860034769
25/01/2006 16:00:00	3.146997904	3.545183722
25/01/2006 17:00:00	2.684308456	3.005255041
25/01/2006 18:00:00	2.003475945	2.29005628
25/01/2006 19:00:00	1.158986831	1.449394991
25/01/2006 20:00:00	0.205327575	0.533078728
25/01/2006 21:00:00	-0.80301536	-0.409084956
25/01/2006 22:00:00	-1.811555512	-1.327288508
25/01/2006 23:00:00	-2.765806422	-2.171724375
26/01/2006 00:00:00	-3.611281626	-2.892585004
26/01/2006 01:00:00	-4.293494663	-3.440062842
26/01/2006 02:00:00	-4.757959072	-3.764350336
26/01/2006 03:00:00	-4.950188391	-3.815639933
26/01/2006 04:00:00	-4.815696159	-3.54412408
26/01/2006 05:00:00	-4.299995914	-2.899995223
26/01/2006 06:00:00	-3.374645386	-1.858251384
26/01/2006 07:00:00	-2.115377308	-0.493111208
26/01/2006 08:00:00	-0.623967723	1.096401927
26/01/2006 09:00:00	0.997807325	2.811264641
26/01/2006 10:00:00	2.648171792	4.552453557
26/01/2006 11:00:00	4.225349636	6.220945294
26/01/2006 12:00:00	5.627564813	7.717716475
26/01/2006 13:00:00	6.753041279	8.943743718
26/01/2006 14:00:00	7.500002992	9.800003646
26/01/2006 15:00:00	7.794474368	10.21442563
26/01/2006 16:00:00	7.673679765	10.22274819
26/01/2006 17:00:00	7.202643044	9.887661689
26/01/2006 18:00:00	6.44638807	9.271856464
26/01/2006 19:00:00	5.469938707	8.438022872
26/01/2006 20:00:00	4.338318819	7.448851262
26/01/2006 21:00:00	3.116552269	6.367031985
26/01/2006 22:00:00	1.869662921	5.255255392
26/01/2006 23:00:00	0.662674639	4.176211834
27/01/2006 00:00:00	-0.439388713	3.192591661
27/01/2006 01:00:00	-1.371503272	2.367085223
27/01/2006 02:00:00	-2.068645174	1.762382872
27/01/2006 03:00:00	-2.465790555	1.441174958
27/01/2006 04:00:00	-2.497915551	1.466151832
27/01/2006 05:00:00	-2.099996299	1.900003844
27/01/2006 06:00:00	-1.236038469	2.776411349
27/01/2006 07:00:00	0.01383616	4.013016743
27/01/2006 08:00:00	1.54047729	5.498453442
27/01/2006 09:00:00	3.234734625	7.121354862
27/01/2006 10:00:00	4.987457867	8.770354419
27/01/2006 11:00:00	6.689496718	10.33408553
27/01/2006 12:00:00	8.231700881	11.7011816
27/01/2006 13:00:00	9.504920059	12.76027606
27/01/2006 14:00:00	10.40000395	13.40000232
27/01/2006 15:00:00	10.83576486	13.53923357
27/01/2006 16:00:00	10.84286343	13.21779998
27/01/2006 17:00:00	10.47992192	12.50577044
27/01/2006 18:00:00	9.805562599	11.4732138
27/01/2006 19:00:00	8.878407717	10.19019896
27/01/2006 20:00:00	7.757079533	8.726794787
27/01/2006 21:00:00	6.500200303	7.153070158
27/01/2006 22:00:00	5.166392285	5.539093949
27/01/2006 23:00:00	3.814277738	3.954935038
28/01/2006 00:00:00	2.502478917	2.4706623
28/01/2006 01:00:00	1.289618081	1.156344613
28/01/2006 02:00:00	0.234317487	0.082050852
28/01/2006 03:00:00	-0.604800607	-0.682150105
28/01/2006 04:00:00	-1.169113945	-1.066189383
28/01/2006 05:00:00	-1.400000269	-0.999998104
28/01/2006 06:00:00	-1.260921225	-0.443024272
28/01/2006 07:00:00	-0.803672485	0.52721873
28/01/2006 08:00:00	-0.102132824	1.803701705
28/01/2006 09:00:00	0.769818981	3.279395459
28/01/2006 10:00:00	1.738304155	4.847270795
28/01/2006 11:00:00	2.729443919	6.400298516
28/01/2006 12:00:00	3.669359499	7.831449429
28/01/2006 13:00:00	4.484172117	9.033694335
28/01/2006 14:00:00	5.100002998	9.90000404
28/01/2006 15:00:00	5.460656009	10.35007497
28/01/2006 16:00:00	5.580664311	10.41050407
28/01/2006 17:00:00	5.49224306	10.13461293
28/01/2006 18:00:00	5.227607413	9.575723143
28/01/2006 19:00:00	4.818972527	8.787156306
28/01/2006 20:00:00	4.29855356	7.822234006
28/01/2006 21:00:00	3.698565669	6.734277835
28/01/2006 22:00:00	3.051224011	5.576609385
28/01/2006 23:00:00	2.388743744	4.402550247
29/01/2006 00:00:00	1.743340024	3.265422013
29/01/2006 01:00:00	1.147228009	2.218546275
29/01/2006 02:00:00	0.632622857	1.315244623
29/01/2006 03:00:00	0.231739723	0.60883865
29/01/2006 04:00:00	-0.023206234	0.152649947
29/01/2006 05:00:00	-0.099999857	1.05004E-07
29/01/2006 06:00:00	0.021034417	0.183519755
29/01/2006 07:00:00	0.309414712	0.653077227
29/01/2006 08:00:00	0.722120023	1.337850659
29/01/2006 09:00:00	1.21612935	2.167018193
29/01/2006 10:00:00	1.748421688	3.069757967
29/01/2006 11:00:00	2.275976034	3.975248122
29/01/2006 12:00:00	2.755771386	4.812666796
29/01/2006 13:00:00	3.14478674	5.511192131
29/01/2006 14:00:00	3.400001094	6.000002266
29/01/2006 15:00:00	3.489380952	6.225784548
29/01/2006 16:00:00	3.424842023	6.205261832
29/01/2006 17:00:00	3.229287106	5.972665523
29/01/2006 18:00:00	2.925619003	5.562227021
29/01/2006 19:00:00	2.536740515	5.008177731
29/01/2006 20:00:00	2.085554442	4.344749054
29/01/2006 21:00:00	1.594963586	3.606172394
29/01/2006 22:00:00	1.087870747	2.826679153
29/01/2006 23:00:00	0.587178726	2.040500733
30/01/2006 00:00:00	0.115790324	1.281868538
30/01/2006 01:00:00	-0.303391658	0.58501397
30/01/2006 02:00:00	-0.64746442	-0.015831569
30/01/2006 03:00:00	-0.893525159	-0.486436675
30/01/2006 04:00:00	-1.018671077	-0.792569946
30/01/2006 05:00:00	-0.999999371	-0.899999979
30/01/2006 06:00:00	-0.824372565	-0.787970163
30/01/2006 07:00:00	-0.517713733	-0.48962202
30/01/2006 08:00:00	-0.115710896	-0.051571345
30/01/2006 09:00:00	0.345947923	0.479566068
30/01/2006 10:00:00	0.831574704	1.057174424
30/01/2006 11:00:00	1.305481423	1.634637927
30/01/2006 12:00:00	1.731980059	2.165340783
30/01/2006 13:00:00	2.07538259	2.602667196
30/01/2006 14:00:00	2.300000994	2.900001372
30/01/2006 15:00:00	2.379407467	3.022531522
30/01/2006 16:00:00	2.324214367	2.98266096
30/01/2006 17:00:00	2.154293907	2.804596548
30/01/2006 18:00:00	1.889518301	2.512545147
30/01/2006 19:00:00	1.549759765	2.130713619
30/01/2006 20:00:00	1.154890514	1.683308826
30/01/2006 21:00:00	0.724782762	1.194537628
30/01/2006 22:00:00	0.279308723	0.688606889
30/01/2006 23:00:00	-0.161659387	0.189723468
31/01/2006 00:00:00	-0.578249354	-0.277905771
31/01/2006 01:00:00	-0.950588963	-0.690073968
31/01/2006 02:00:00	-1.258805999	-1.022574262
31/01/2006 03:00:00	-1.483028248	-1.25119979
31/01/2006 04:00:00	-1.603383495	-1.35174369
31/01/2006 05:00:00	-1.599999526	-1.299999103
31/01/2006 06:00:00	-1.461478397	-1.083025229
31/01/2006 07:00:00	-1.210318583	-0.73294464
31/01/2006 08:00:00	-0.877492496	-0.293145521
31/01/2006 09:00:00	-0.493972548	0.192983938
31/01/2006 10:00:00	-0.090731148	0.682055551
31/01/2006 11:00:00	0.301259291	1.130681129
31/01/2006 12:00:00	0.651026359	1.495472485
31/01/2006 13:00:00	0.927597643	1.733041432
31/01/2006 14:00:00	1.100000734	1.799999781
31/01/2006 15:00:00	1.145463484	1.666107108
31/01/2006 16:00:00	1.074014149	1.353712983
31/01/2006 17:00:00	0.903880923	0.898314217
31/01/2006 18:00:00	0.653291999	0.335407616
31/01/2006 19:00:00	0.34047557	-0.29951001
31/01/2006 20:00:00	-0.016340173	-0.970941855
31/01/2006 21:00:00	-0.398927035	-1.643391109
31/01/2006 22:00:00	-0.789056824	-2.281360964
31/01/2006 23:00:00	-1.168501347	-2.849354613
01/02/2006 00:00:00	-1.519032411	-3.311875246
01/02/2006 01:00:00	-1.822421823	-3.633426057
01/02/2006 02:00:00	-2.06044139	-3.778510236
01/02/2006 03:00:00	-2.214862919	-3.711630975
01/02/2006 04:00:00	-2.267458218	-3.397291466
01/02/2006 05:00:00	-2.199999093	-2.799994902
01/02/2006 06:00:00	-2.001962885	-1.902441937
01/02/2006 07:00:00	-1.693648442	-0.760121598
01/02/2006 08:00:00	-1.303059829	0.553280366
01/02/2006 09:00:00	-0.858201113	1.964078206
01/02/2006 10:00:00	-0.387076362	3.398586174
01/02/2006 11:00:00	0.08231036	4.78311852
01/02/2006 12:00:00	0.521954984	6.043989496
01/02/2006 13:00:00	0.903853444	7.107513352
01/02/2006 14:00:00	1.200001674	7.900004341
01/02/2006 15:00:00	1.38932628	8.366486075
01/02/2006 16:00:00	1.478475983	8.526818073
01/02/2006 17:00:00	1.481029891	8.419568448
01/02/2006 18:00:00	1.410567115	8.083305308
01/02/2006 19:00:00	1.280666762	7.556596766
01/02/2006 20:00:00	1.104907942	6.878010933
01/02/2006 21:00:00	0.896869763	6.086115919
01/02/2006 22:00:00	0.670131333	5.219479835
01/02/2006 23:00:00	0.438271762	4.316670792
02/02/2006 00:00:00	0.214870159	3.416256901
02/02/2006 01:00:00	0.013505631	2.556806272
02/02/2006 02:00:00	-0.152242712	1.776887018
02/02/2006 03:00:00	-0.268795761	1.115067248
02/02/2006 04:00:00	-0.322574408	0.609915074
02/02/2006 05:00:00	-0.299999544	0.299998607
02/02/2006 06:00:00	-0.193499903	0.210223022
02/02/2006 07:00:00	-0.019535083	0.310842897
02/02/2006 08:00:00	0.199427727	0.558450448
02/02/2006 09:00:00	0.440921336	0.909637892
02/02/2006 10:00:00	0.682478556	1.320997443
02/02/2006 11:00:00	0.901632196	1.749121317
02/02/2006 12:00:00	1.075915069	2.15060173
02/02/2006 13:00:00	1.182859984	2.482030898
02/02/2006 14:00:00	1.199999751	2.700001036
02/02/2006 15:00:00	1.111503525	2.771789852
02/02/2006 16:00:00	0.928085262	2.70741612
02/02/2006 17:00:00	0.667094984	2.527583654
02/02/2006 18:00:00	0.345882711	2.252996266
02/02/2006 19:00:00	-0.018201539	1.904357771
02/02/2006 20:00:00	-0.407807745	1.502371982
02/02/2006 21:00:00	-0.805585886	1.067742712
02/02/2006 22:00:00	-1.194185944	0.621173775
02/02/2006 23:00:00	-1.556257898	0.183368985
03/02/2006 00:00:00	-1.874451729	-0.224967845
03/02/2006 01:00:00	-2.131417416	-0.583132901
03/02/2006 02:00:00	-2.30980494	-0.87042237
03/02/2006 03:00:00	-2.39226428	-1.066132438
03/02/2006 04:00:00	-2.361445417	-1.149559292
03/02/2006 05:00:00	-2.199998331	-1.099999118
03/02/2006 06:00:00	-1.900030041	-0.906688743
03/02/2006 07:00:00	-1.491474903	-0.598626702
03/02/2006 08:00:00	-1.013723905	-0.214751742
03/02/2006 09:00:00	-0.506168037	0.205997391
03/02/2006 10:00:00	-0.008198286	0.624681948
03/02/2006 11:00:00	0.440794358	1.002363183
03/02/2006 12:00:00	0.801418909	1.30010235
03/02/2006 13:00:00	1.034284378	1.4789607
03/02/2006 14:00:00	1.099999775	1.499999486
03/02/2006 15:00:00	0.970954546	1.335806454
03/02/2006 16:00:00	0.66665884	1.005074306
03/02/2006 17:00:00	0.218402727	0.538021737
03/02/2006 18:00:00	-0.342523725	-0.035132558
03/02/2006 19:00:00	-0.984830446	-0.684169885
03/02/2006 20:00:00	-1.677227365	-1.378871551
03/02/2006 21:00:00	-2.388424414	-2.089018861
03/02/2006 22:00:00	-3.087131523	-2.78439312
03/02/2006 23:00:00	-3.742058622	-3.434775635
04/02/2006 00:00:00	-4.321915642	-4.009947712
04/02/2006 01:00:00	-4.795412513	-4.479690655
04/02/2006 02:00:00	-5.131259166	-4.813785772
04/02/2006 03:00:00	-5.298165531	-4.982014368
04/02/2006 04:00:00	-5.264841538	-4.954157748
04/02/2006 05:00:00	-4.999997119	-4.699997219
04/02/2006 06:00:00	-4.486971955	-4.203658957
04/02/2006 07:00:00	-3.767623446	-3.506647349
04/02/2006 08:00:00	-2.898438094	-2.664811019
04/02/2006 09:00:00	-1.935902404	-1.733998592
04/02/2006 10:00:00	-0.93650288	-0.770058693
04/02/2006 11:00:00	0.043273975	0.171160056
04/02/2006 12:00:00	0.946941657	1.03380903
04/02/2006 13:00:00	1.718013662	1.762039605
04/02/2006 14:00:00	2.300003487	2.300003156
04/02/2006 15:00:00	2.650608872	2.606114958
04/02/2006 16:00:00	2.78426328	2.6958446
04/02/2006 17:00:00	2.729583784	2.598924933
04/02/2006 18:00:00	2.515187456	2.345088808
04/02/2006 19:00:00	2.169691371	1.964069077
04/02/2006 20:00:00	1.721712603	1.485598589
04/02/2006 21:00:00	1.199868224	0.939410197
04/02/2006 22:00:00	0.632775307	0.35523675
04/02/2006 23:00:00	0.049050928	-0.2371889
05/02/2006 00:00:00	-0.522687842	-0.808133902
05/02/2006 01:00:00	-1.053823928	-1.327865405
05/02/2006 02:00:00	-1.515740257	-1.766650559
05/02/2006 03:00:00	-1.879819755	-2.094756513
05/02/2006 04:00:00	-2.117445349	-2.282450415
05/02/2006 05:00:00	-2.199999966	-2.299999415
05/02/2006 06:00:00	-2.110056083	-2.130297117
05/02/2006 07:00:00	-1.874943372	-1.806741802
05/02/2006 08:00:00	-1.533180548	-1.375357635
05/02/2006 09:00:00	-1.123286325	-0.882168778
05/02/2006 10:00:00	-0.683779418	-0.373199398
05/02/2006 11:00:00	-0.253178542	0.105526344
05/02/2006 12:00:00	0.129997587	0.507984282
05/02/2006 13:00:00	0.427230254	0.788150254
05/02/2006 14:00:00	0.600000746	0.900000094
05/02/2006 15:00:00	0.620586616	0.810788923
05/02/2006 16:00:00	0.504449514	0.540887778
05/02/2006 17:00:00	0.277846864	0.123946371
05/02/2006 18:00:00	-0.032963911	-0.406385585
05/02/2006 19:00:00	-0.401725386	-1.016458376
05/02/2006 20:00:00	-0.802180136	-1.672622291
05/02/2006 21:00:00	-1.208070738	-2.341227617
05/02/2006 22:00:00	-1.593139767	-2.98862464
05/02/2006 23:00:00	-1.931129799	-3.581163649
06/02/2006 00:00:00	-2.195783409	-4.085194931
06/02/2006 01:00:00	-2.360843174	-4.467068772
06/02/2006 02:00:00	-2.40005167	-4.693135461
06/02/2006 03:00:00	-2.287151471	-4.729745283
06/02/2006 04:00:00	-1.995885154	-4.543248528
06/02/2006 05:00:00	-1.499995295	-4.099995482
06/02/2006 06:00:00	-0.787358568	-3.383340232
06/02/2006 07:00:00	0.097613268	-2.444650487
06/02/2006 08:00:00	1.096375016	-1.352296964
06/02/2006 09:00:00	2.150381474	-0.17465038
06/02/2006 10:00:00	3.201087444	1.019918547
06/02/2006 11:00:00	4.189947727	2.163039101
06/02/2006 12:00:00	5.058417122	3.186340563
06/02/2006 13:00:00	5.747950432	4.021452217
06/02/2006 14:00:00	6.200002455	4.600003345
06/02/2006 15:00:00	6.372540269	4.872201735
06/02/2006 16:00:00	6.289578505	4.862567456
06/02/2006 17:00:00	5.991643292	4.61419821
06/02/2006 18:00:00	5.519260762	4.170191697
06/02/2006 19:00:00	4.912957045	3.57364562
06/02/2006 20:00:00	4.213258273	2.867657681
06/02/2006 21:00:00	3.460690577	2.09532558
06/02/2006 22:00:00	2.695780087	1.299747021
06/02/2006 23:00:00	1.959052935	0.524019704
07/02/2006 00:00:00	1.291035251	-0.188758668
07/02/2006 01:00:00	0.732253166	-0.795490395
07/02/2006 02:00:00	0.323232811	-1.253077773
07/02/2006 03:00:00	0.104500317	-1.518423103
07/02/2006 04:00:00	0.116581815	-1.548428681
07/02/2006 05:00:00	0.400003437	-1.299996806
07/02/2006 06:00:00	0.976020789	-0.749339779
07/02/2006 07:00:00	1.788809225	0.050091931
07/02/2006 08:00:00	2.763274496	1.025538775
07/02/2006 09:00:00	3.82432235	2.104241201
07/02/2006 10:00:00	4.896858535	3.213439659
07/02/2006 11:00:00	5.905788803	4.280374598
07/02/2006 12:00:00	6.776018902	5.232286468
07/02/2006 13:00:00	7.43245458	5.996415718
07/02/2006 14:00:00	7.800001588	6.500002798
07/02/2006 15:00:00	7.824163922	6.689455327
07/02/2006 16:00:00	7.532836589	6.58784776
07/02/2006 17:00:00	6.974511853	6.237420801
07/02/2006 18:00:00	6.197681977	5.680415154
07/02/2006 19:00:00	5.250839226	4.959071522
07/02/2006 20:00:00	4.182475863	4.115630608
07/02/2006 21:00:00	3.041084152	3.192333118
07/02/2006 22:00:00	1.875156356	2.231419753
07/02/2006 23:00:00	0.733184739	1.275131217
08/02/2006 00:00:00	-0.336338434	0.365708215
08/02/2006 01:00:00	-1.284920901	-0.45460855
08/02/2006 02:00:00	-2.064070397	-1.143578376
08/02/2006 03:00:00	-2.625294658	-1.658960557
08/02/2006 04:00:00	-2.920101422	-1.958514391
08/02/2006 05:00:00	-2.899998424	-1.999999173
08/02/2006 06:00:00	-2.537691513	-1.75915739
08/02/2006 07:00:00	-1.890676921	-1.283662523
08/02/2006 08:00:00	-1.037647958	-0.639170367
08/02/2006 09:00:00	-0.057297933	0.108663284
08/02/2006 10:00:00	0.971679844	0.894182638
08/02/2006 11:00:00	1.970592063	1.651731899
08/02/2006 12:00:00	2.860745414	2.315655274
08/02/2006 13:00:00	3.563446588	2.82029697
08/02/2006 14:00:00	4.000002276	3.100001193
08/02/2006 15:00:00	4.112786488	3.107199343
08/02/2006 16:00:00	3.928440446	2.866669815
08/02/2006 17:00:00	3.494671656	2.421277307
08/02/2006 18:00:00	2.859187625	1.813886519
08/02/2006 19:00:00	2.069695857	1.087362148
08/02/2006 20:00:00	1.173903858	0.284568893
08/02/2006 21:00:00	0.219519135	-0.551628547
08/02/2006 22:00:00	-0.745750808	-1.378365474
08/02/2006 23:00:00	-1.674198465	-2.15277719
09/02/2006 00:00:00	-2.518116329	-2.831998996
09/02/2006 01:00:00	-3.229796896	-3.373166194
09/02/2006 02:00:00	-3.761532659	-3.733414084
09/02/2006 03:00:00	-4.065616113	-3.86987797
09/02/2006 04:00:00	-4.094339752	-3.739693151
09/02/2006 05:00:00	-3.799996071	-3.29999493
09/02/2006 06:00:00	-3.156495136	-2.528437669
09/02/2006 07:00:00	-2.224215148	-1.484749922
09/02/2006 08:00:00	-1.085150799	-0.249178277
09/02/2006 09:00:00	0.178703219	1.098030676
09/02/2006 10:00:00	1.485352213	2.476630349
09/02/2006 11:00:00	2.75280149	3.806374152
09/02/2006 12:00:00	3.899056359	5.007015496
09/02/2006 13:00:00	4.842122126	5.998307793
09/02/2006 14:00:00	5.500004099	6.700004453
09/02/2006 15:00:00	5.813022249	7.053220488
09/02/2006 16:00:00	5.810752955	7.084515158
09/02/2006 17:00:00	5.545086133	6.841808246
09/02/2006 18:00:00	5.067911701	6.373019535
09/02/2006 19:00:00	4.431119576	5.726068811
09/02/2006 20:00:00	3.686599675	4.948875855
09/02/2006 21:00:00	2.886241914	4.089360453
09/02/2006 22:00:00	2.081936212	3.195442387
09/02/2006 23:00:00	1.325572485	2.315041442
10/02/2006 00:00:00	0.669040651	1.496077401
10/02/2006 01:00:00	0.164230627	0.786470047
10/02/2006 02:00:00	-0.136967671	0.234139165
10/02/2006 03:00:00	-0.182664325	-0.112995463
10/02/2006 04:00:00	0.079030583	-0.207014051
10/02/2006 05:00:00	0.700006969	3.18229E-06
10/02/2006 06:00:00	1.706889027	0.535102391
10/02/2006 07:00:00	3.025240648	1.341837337
10/02/2006 08:00:00	4.555361287	2.34288922
10/02/2006 09:00:00	6.197550402	3.460939236
10/02/2006 10:00:00	7.852107451	4.618668586
10/02/2006 11:00:00	9.41933189	5.738758468
10/02/2006 12:00:00	10.79952318	6.74389008
10/02/2006 13:00:00	11.89298077	7.55674462
10/02/2006 14:00:00	12.60000413	8.100003288
10/02/2006 15:00:00	12.84846763	8.317615768
10/02/2006 16:00:00	12.67654251	8.238603495
10/02/2006 17:00:00	12.14997349	7.913255297
10/02/2006 18:00:00	11.33450533	7.391859998
10/02/2006 19:00:00	10.29588274	6.724706425
10/02/2006 20:00:00	9.099850457	5.962083404
10/02/2006 21:00:00	7.812153225	5.154279759
10/02/2006 22:00:00	6.498535772	4.351584318
10/02/2006 23:00:00	5.224742833	3.604285905
11/02/2006 00:00:00	4.056519142	2.962673348
11/02/2006 01:00:00	3.059609433	2.477035471
11/02/2006 02:00:00	2.29975844	2.197661101
11/02/2006 03:00:00	1.842710897	2.174839063
11/02/2006 04:00:00	1.754211537	2.458858183
11/02/2006 05:00:00	2.100005095	3.100007287
11/02/2006 06:00:00	2.915927235	4.123418443
11/02/2006 07:00:00	4.118180469	5.453599312
11/02/2006 08:00:00	5.593059803	6.989902114
11/02/2006 09:00:00	7.226860242	8.631679066
11/02/2006 10:00:00	8.905876792	10.27828239
11/02/2006 11:00:00	10.51640446	11.8290643
11/02/2006 12:00:00	11.94473825	13.18337702
11/02/2006 13:00:00	13.07717317	14.24057276
11/02/2006 14:00:00	13.80000422	14.90000375
11/02/2006 15:00:00	14.02990623	15.08854312
11/02/2006 16:00:00	13.80507016	14.84314474
11/02/2006 17:00:00	13.19406514	14.22828196
11/02/2006 18:00:00	12.26546035	13.30842811
11/02/2006 19:00:00	11.08782495	12.14805656
11/02/2006 20:00:00	9.729728107	10.81164062
11/02/2006 21:00:00	8.259738974	9.363653659
11/02/2006 22:00:00	6.746426717	7.868569002
11/02/2006 23:00:00	5.258360498	6.390859998
12/02/2006 00:00:00	3.86410948	4.994999987
12/02/2006 01:00:00	2.632242823	3.745462312
12/02/2006 02:00:00	1.631329692	2.706720315
12/02/2006 03:00:00	0.929939247	1.943247339
12/02/2006 04:00:00	0.596640652	1.519516726
12/02/2006 05:00:00	0.700003068	1.500001817
12/02/2006 06:00:00	1.280208268	1.92317785
12/02/2006 07:00:00	2.263891504	2.723530412
12/02/2006 08:00:00	3.549302153	3.809548377
12/02/2006 09:00:00	5.034689594	5.089720615
12/02/2006 10:00:00	6.618303206	6.472535999
12/02/2006 11:00:00	8.198392365	7.8664834
12/02/2006 12:00:00	9.673206452	9.180051691
12/02/2006 13:00:00	10.94099484	10.32172974
12/02/2006 14:00:00	11.90000692	11.20000643
12/02/2006 15:00:00	12.47387296	11.74587832
12/02/2006 16:00:00	12.68774412	11.98037036
12/02/2006 17:00:00	12.59215111	11.94701398
12/02/2006 18:00:00	12.23762462	11.68934062
12/02/2006 19:00:00	11.67469534	11.25088171
12/02/2006 20:00:00	10.95389397	10.67516868
12/02/2006 21:00:00	10.12575121	10.00573297
12/02/2006 22:00:00	9.240797763	9.286106006
12/02/2006 23:00:00	8.349564315	8.559819226
13/02/2006 00:00:00	7.502581567	7.870404061
13/02/2006 01:00:00	6.750380215	7.261391946
13/02/2006 02:00:00	6.143490956	6.776314312
13/02/2006 03:00:00	5.732444487	6.458702594
13/02/2006 04:00:00	5.567771505	6.352088223
13/02/2006 05:00:00	5.700002706	6.500002635
13/02/2006 06:00:00	6.158970984	6.927639764
13/02/2006 07:00:00	6.891720278	7.586845557
13/02/2006 08:00:00	7.824597853	8.411129465
13/02/2006 09:00:00	8.883950974	9.334000939
13/02/2006 10:00:00	9.996126906	10.28896943
13/02/2006 11:00:00	11.08747291	11.20954439
13/02/2006 12:00:00	12.08433626	12.02923526
13/02/2006 13:00:00	12.91306422	12.6815515
13/02/2006 14:00:00	13.50000405	13.10000256
13/02/2006 15:00:00	13.79108702	13.23608372
13/02/2006 16:00:00	13.81057831	13.11323163
13/02/2006 17:00:00	13.60232601	12.77286777
13/02/2006 18:00:00	13.21017821	12.25641362
13/02/2006 19:00:00	12.67798302	11.60529067
13/02/2006 20:00:00	12.04958853	10.8609204
13/02/2006 21:00:00	11.36884285	10.06472431
13/02/2006 22:00:00	10.67959406	9.258123878
13/02/2006 23:00:00	10.02569027	8.482540586
14/02/2006 00:00:00	9.450979582	7.779395923
14/02/2006 01:00:00	8.999310081	7.190111375
14/02/2006 02:00:00	8.714529872	6.756108425
14/02/2006 03:00:00	8.640487052	6.518808561
14/02/2006 04:00:00	8.821029719	6.519633268
14/02/2006 05:00:00	9.30000597	6.800004031
14/02/2006 06:00:00	10.09976099	7.382223268
14/02/2006 07:00:00	11.15663069	8.212119256
14/02/2006 08:00:00	12.38544928	9.216402271
14/02/2006 09:00:00	13.70105095	10.32178259
14/02/2006 10:00:00	15.01826991	11.45497048
14/02/2006 11:00:00	16.25194035	12.54267623
14/02/2006 12:00:00	17.31689647	13.5116101
14/02/2006 13:00:00	18.12797248	14.28848237
14/02/2006 14:00:00	18.60000257	14.80000332
14/02/2006 15:00:00	18.6712046	14.99220413
14/02/2006 16:00:00	18.37332849	14.88839744
14/02/2006 17:00:00	17.76150647	14.53121572
14/02/2006 18:00:00	16.89087081	13.96329144
14/02/2006 19:00:00	15.81655374	13.22725706
14/02/2006 20:00:00	14.59368752	12.36574505
14/02/2006 21:00:00	13.2774044	11.42138788
14/02/2006 22:00:00	11.92283663	10.43681801
14/02/2006 23:00:00	10.58511646	9.454667919
15/02/2006 00:00:00	9.319376137	8.517570062
15/02/2006 01:00:00	8.180747919	7.668156908
15/02/2006 02:00:00	7.224364054	6.949060926
15/02/2006 03:00:00	6.505356791	6.402914581
15/02/2006 04:00:00	6.078858381	6.072350341
15/02/2006 05:00:00	6.000001074	6.000000673
15/02/2006 06:00:00	6.30096599	6.210798193
15/02/2006 07:00:00	6.922132326	6.658878131
15/02/2006 08:00:00	7.780929456	7.280676876
15/02/2006 09:00:00	8.794786752	8.012630814
15/02/2006 10:00:00	9.881133587	8.791176332
15/02/2006 11:00:00	10.95739933	9.552749817
15/02/2006 12:00:00	11.94101336	10.23378766
15/02/2006 13:00:00	12.74940505	10.77072624
15/02/2006 14:00:00	13.30000377	11.10000195
15/02/2006 15:00:00	13.53101698	11.1746453
15/02/2006 16:00:00	13.46376216	11.01406139
15/02/2006 17:00:00	13.14033369	10.65424848
15/02/2006 18:00:00	12.60282594	10.13120484
15/02/2006 19:00:00	11.89333329	9.48092875
15/02/2006 20:00:00	11.05395012	8.739418469
15/02/2006 21:00:00	10.12677081	7.942672268
15/02/2006 22:00:00	9.153889719	7.126688415
15/02/2006 23:00:00	8.17740124	6.327465181
16/02/2006 00:00:00	7.239399746	5.581000832
16/02/2006 01:00:00	6.381979613	4.923293639
16/02/2006 02:00:00	5.647235219	4.39034187
16/02/2006 03:00:00	5.07726094	4.018143794
16/02/2006 04:00:00	4.714151153	3.84269768
16/02/2006 05:00:00	4.600000236	3.900001796
16/02/2006 06:00:00	4.759177329	4.209964542
16/02/2006 07:00:00	5.145152694	4.728136709
16/02/2006 08:00:00	5.693672385	5.393980151
16/02/2006 09:00:00	6.340482456	6.146956725
16/02/2006 10:00:00	7.021328961	6.926528285
16/02/2006 11:00:00	7.671957954	7.672156685
16/02/2006 12:00:00	8.22811549	8.323303783
16/02/2006 13:00:00	8.625547622	8.819431432
16/02/2006 14:00:00	8.800000405	9.100001487
16/02/2006 15:00:00	8.704771013	9.120720484
16/02/2006 16:00:00	8.363359053	8.902271779
16/02/2006 17:00:00	7.816814225	8.481582456
16/02/2006 18:00:00	7.106186228	7.895579602
16/02/2006 19:00:00	6.272524764	7.181190302
16/02/2006 20:00:00	5.356879532	6.375341642
16/02/2006 21:00:00	4.400300233	5.514960707
16/02/2006 22:00:00	3.443836567	4.636974584
16/02/2006 23:00:00	2.528538235	3.778310358
17/02/2006 00:00:00	1.695454937	2.975895114
17/02/2006 01:00:00	0.985636373	2.266655939
17/02/2006 02:00:00	0.440132243	1.687519917
17/02/2006 03:00:00	0.099992248	1.275414135
17/02/2006 04:00:00	0.006266088	1.067265678
17/02/2006 05:00:00	0.200003464	1.100001632
17/02/2006 06:00:00	0.703388427	1.393912992
17/02/2006 07:00:00	1.463144671	1.902748354
17/02/2006 08:00:00	2.407131358	2.563621209
17/02/2006 09:00:00	3.46320765	3.313645049
17/02/2006 10:00:00	4.559232708	4.089933363
17/02/2006 11:00:00	5.623065693	4.829599643
17/02/2006 12:00:00	6.582565769	5.469757379
17/02/2006 13:00:00	7.365592096	5.947520061
17/02/2006 14:00:00	7.900003836	6.200001181
17/02/2006 15:00:00	8.132882418	6.181976766
17/02/2006 16:00:00	8.088196044	5.918870883
17/02/2006 17:00:00	7.809134038	5.453769082
17/02/2006 18:00:00	7.338885723	4.829756915
17/02/2006 19:00:00	6.720640423	4.089919933
17/02/2006 20:00:00	5.99758746	3.277343687
17/02/2006 21:00:00	5.212916159	2.435113727
17/02/2006 22:00:00	4.409815842	1.606315605
17/02/2006 23:00:00	3.631475833	0.83403487
18/02/2006 00:00:00	2.921085456	0.161357075
18/02/2006 01:00:00	2.321834034	-0.368632229
18/02/2006 02:00:00	1.87691089	-0.712847493
18/02/2006 03:00:00	1.629505347	-0.828203165
18/02/2006 04:00:00	1.622806729	-0.671613694
18/02/2006 05:00:00	1.90000436	-0.199993529
18/02/2006 06:00:00	2.484127419	0.608301865
18/02/2006 07:00:00	3.317566947	1.689155551
18/02/2006 08:00:00	4.322555057	2.957010867
18/02/2006 09:00:00	5.421323864	4.326311155
18/02/2006 10:00:00	6.536105479	5.711499754
18/02/2006 11:00:00	7.589132018	7.027020005
18/02/2006 12:00:00	8.502635593	8.187315247
18/02/2006 13:00:00	9.198848318	9.106828821
18/02/2006 14:00:00	9.600002306	9.700004066
18/02/2006 15:00:00	9.650366417	9.905030627
18/02/2006 16:00:00	9.382353813	9.755080475
18/02/2006 17:00:00	8.850413063	9.307070443
18/02/2006 18:00:00	8.108992736	8.617917364
18/02/2006 19:00:00	7.212541401	7.744538068
18/02/2006 20:00:00	6.215507627	6.743849391
18/02/2006 21:00:00	5.172339983	5.672768162
18/02/2006 22:00:00	4.137487039	4.588211216
18/02/2006 23:00:00	3.165397362	3.547095384
19/02/2006 00:00:00	2.310519523	2.606337499
19/02/2006 01:00:00	1.627302089	1.822854394
19/02/2006 02:00:00	1.170193631	1.253562901
19/02/2006 03:00:00	0.993642717	0.955379852
19/02/2006 04:00:00	1.152097916	0.98522208
19/02/2006 05:00:00	1.700007797	1.400006418
19/02/2006 06:00:00	2.664741084	2.230521779
19/02/2006 07:00:00	3.965350453	3.403048617
19/02/2006 08:00:00	5.493810398	4.817741074
19/02/2006 09:00:00	7.142095416	6.374753293
19/02/2006 10:00:00	8.802180002	7.974239415
19/02/2006 11:00:00	10.36603865	9.516353581
19/02/2006 12:00:00	11.72564586	10.90124994
19/02/2006 13:00:00	12.77297612	12.02908262
19/02/2006 14:00:00	13.40000393	12.80000577
19/02/2006 15:00:00	13.52898265	13.14079963
19/02/2006 16:00:00	13.20327737	13.08474553
19/02/2006 17:00:00	12.49653015	12.69174924
19/02/2006 18:00:00	11.48238308	12.02171653
19/02/2006 19:00:00	10.23447822	11.13455318
19/02/2006 20:00:00	8.826457648	10.09016496
19/02/2006 21:00:00	7.331963441	8.948457649
19/02/2006 22:00:00	5.824637671	7.769337017
19/02/2006 23:00:00	4.378122412	6.61270884
20/02/2006 00:00:00	3.066059738	5.53847889
20/02/2006 01:00:00	1.962091723	4.606552944
20/02/2006 02:00:00	1.139860442	3.876836775
20/02/2006 03:00:00	0.673007967	3.409236157
20/02/2006 04:00:00	0.635176372	3.263656864
20/02/2006 05:00:00	1.100007733	3.50000467
20/02/2006 06:00:00	2.108284146	4.152809746
20/02/2006 07:00:00	3.569351925	5.155103027
20/02/2006 08:00:00	5.359699463	6.414541437
20/02/2006 09:00:00	7.355815154	7.838781895
20/02/2006 10:00:00	9.434187394	9.335481325
20/02/2006 11:00:00	11.47130458	10.81229665
20/02/2006 12:00:00	13.3436551	12.17688478
20/02/2006 13:00:00	14.92772735	13.33690266
20/02/2006 14:00:00	16.10000973	14.20000719
20/02/2006 15:00:00	16.76807848	14.69681192
20/02/2006 16:00:00	16.96385738	14.84975399
20/02/2006 17:00:00	16.75035607	14.70422571
20/02/2006 18:00:00	16.19058421	14.30561939
20/02/2006 19:00:00	15.34755147	13.69932733
20/02/2006 20:00:00	14.2842675	12.93074184
20/02/2006 21:00:00	13.06374195	12.04525525
20/02/2006 22:00:00	11.74898449	11.08825984
20/02/2006 23:00:00	10.40300476	10.10514794
21/02/2006 00:00:00	9.088812442	9.14131186
21/02/2006 01:00:00	7.869417177	8.242143899
21/02/2006 02:00:00	6.807828626	7.453036372
21/02/2006 03:00:00	5.967056446	6.819381588
21/02/2006 04:00:00	5.410110296	6.386571856
21/02/2006 05:00:00	5.199999833	6.199999486
21/02/2006 06:00:00	5.375710438	6.287921518
21/02/2006 07:00:00	5.880133452	6.610056096
21/02/2006 08:00:00	6.632137472	7.108987187
21/02/2006 09:00:00	7.550591095	7.727298759
21/02/2006 10:00:00	8.554362917	8.407574779
21/02/2006 11:00:00	9.562321536	9.092399214
21/02/2006 12:00:00	10.49333555	9.724356032
21/02/2006 13:00:00	11.26627355	10.2460292
21/02/2006 14:00:00	11.80000414	10.60000269
21/02/2006 15:00:00	12.03380195	10.74339638
21/02/2006 16:00:00	11.98856309	10.69147198
21/02/2006 17:00:00	11.70558839	10.47402618
21/02/2006 18:00:00	11.22617871	10.12085566
21/02/2006 19:00:00	10.59163488	9.66175713
21/02/2006 20:00:00	9.843257725	9.126527265
21/02/2006 21:00:00	9.022348098	8.544962759
21/02/2006 22:00:00	8.170206832	7.946860302
21/02/2006 23:00:00	7.328134765	7.362016585
22/02/2006 00:00:00	6.537432735	6.820228297
22/02/2006 01:00:00	5.83940158	6.351292128
22/02/2006 02:00:00	5.275342138	5.985004769
22/02/2006 03:00:00	4.886555248	5.75116291
22/02/2006 04:00:00	4.714341746	5.67956324
22/02/2006 05:00:00	4.800002472	5.80000245
22/02/2006 06:00:00	5.1671561	6.128501582
22/02/2006 07:00:00	5.768694955	6.625980872
22/02/2006 08:00:00	6.539830344	7.239585803
22/02/2006 09:00:00	7.415773578	7.916461858
22/02/2006 10:00:00	8.331735966	8.603754521
22/02/2006 11:00:00	9.222928816	9.248609273
22/02/2006 12:00:00	10.02456344	9.798171597
22/02/2006 13:00:00	10.67185114	10.19958698
22/02/2006 14:00:00	11.10000324	10.4000009
22/02/2006 15:00:00	11.26154424	10.36159783
22/02/2006 16:00:00	11.17824925	10.10671624
22/02/2006 17:00:00	10.88920545	9.672732594
22/02/2006 18:00:00	10.43350001	9.097023377
22/02/2006 19:00:00	9.850220115	8.416965057
22/02/2006 20:00:00	9.178452933	7.669934107
22/02/2006 21:00:00	8.457285646	6.893307001
22/02/2006 22:00:00	7.72580543	6.124460211
22/02/2006 23:00:00	7.023099463	5.40077021
23/02/2006 00:00:00	6.388254921	4.759613472
23/02/2006 01:00:00	5.860358982	4.23836647
23/02/2006 02:00:00	5.478498823	3.874405677
23/02/2006 03:00:00	5.281761621	3.705107565
23/02/2006 04:00:00	5.309234554	3.767848609
23/02/2006 05:00:00	5.600004797	4.10000528
23/02/2006 06:00:00	6.174345947	4.720462106
23/02/2006 07:00:00	6.977279757	5.574138264
23/02/2006 08:00:00	7.935015645	6.587462211
23/02/2006 09:00:00	8.973763024	7.686862401
23/02/2006 10:00:00	10.01973131	8.798767287
23/02/2006 11:00:00	10.99912993	9.849605325
23/02/2006 12:00:00	11.83816828	10.76580497
23/02/2006 13:00:00	12.46305579	11.47379467
23/02/2006 14:00:00	12.80000187	11.90000289
23/02/2006 15:00:00	12.79580217	11.99093257
23/02/2006 16:00:00	12.47959453	11.77338195
23/02/2006 17:00:00	11.90110166	11.29422243
23/02/2006 18:00:00	11.11004627	10.60032541
23/02/2006 19:00:00	10.15615105	9.738562274
23/02/2006 20:00:00	9.089138713	8.75580443
23/02/2006 21:00:00	7.958731966	7.69892327
23/02/2006 22:00:00	6.814653511	6.614790193
23/02/2006 23:00:00	5.706626055	5.550276595
24/02/2006 00:00:00	4.684372302	4.552253872
24/02/2006 01:00:00	3.797614958	3.667593422
24/02/2006 02:00:00	3.096076727	2.943166641
24/02/2006 03:00:00	2.629480316	2.425844926
24/02/2006 04:00:00	2.447548427	2.162499674
24/02/2006 05:00:00	2.600003768	2.200002281
24/02/2006 06:00:00	3.114313551	2.565457498
24/02/2006 07:00:00	3.928926013	3.206906143
24/02/2006 08:00:00	4.960035394	4.052623719
24/02/2006 09:00:00	6.123835936	5.030885728
24/02/2006 10:00:00	7.33652188	6.069967671
24/02/2006 11:00:00	8.514287468	7.098145051
24/02/2006 12:00:00	9.57332694	8.04369337
24/02/2006 13:00:00	10.42983454	8.834888129
24/02/2006 14:00:00	11.0000045	9.40000483
24/02/2006 15:00:00	11.22260835	9.686141874
24/02/2006 16:00:00	11.12672361	9.715686709
24/02/2006 17:00:00	10.76400359	9.529848409
24/02/2006 18:00:00	10.18610157	9.169836046
24/02/2006 19:00:00	9.444670833	8.676858693
24/02/2006 20:00:00	8.59136467	8.092125423
24/02/2006 21:00:00	7.67783637	7.456845311
24/02/2006 22:00:00	6.755739219	6.812227427
24/02/2006 23:00:00	5.876726504	6.199480846
25/02/2006 00:00:00	5.092451515	5.659814641
25/02/2006 01:00:00	4.454567537	5.234437885
25/02/2006 02:00:00	4.014727859	4.96455965
25/02/2006 03:00:00	3.824585769	4.89138901
25/02/2006 04:00:00	3.935794553	5.056135039
25/02/2006 05:00:00	4.4000075	5.500006808
25/02/2006 06:00:00	5.243930775	6.243972713
25/02/2006 07:00:00	6.39448546	7.228041209
25/02/2006 08:00:00	7.753647223	8.371981454
25/02/2006 09:00:00	9.223391731	9.595562609
25/02/2006 10:00:00	10.70569465	10.81855384
25/02/2006 11:00:00	12.10253165	11.96072429
25/02/2006 12:00:00	13.31587839	12.94184314
25/02/2006 13:00:00	14.24771055	13.68167954
25/02/2006 14:00:00	14.80000378	14.10000265
25/02/2006 15:00:00	14.90122849	14.13891234
25/02/2006 16:00:00	14.58583029	13.82982823
25/02/2006 17:00:00	13.91474772	13.22649914
25/02/2006 18:00:00	12.94891931	12.38267384
25/02/2006 19:00:00	11.74928358	11.35210115
25/02/2006 20:00:00	10.37677906	10.18852985
25/02/2006 21:00:00	8.89234429	8.945708756
25/02/2006 22:00:00	7.356917787	7.677386657
25/02/2006 23:00:00	5.831438083	6.437312352
26/02/2006 00:00:00	4.376843708	5.27923464
26/02/2006 01:00:00	3.054073189	4.25690232
26/02/2006 02:00:00	1.924065056	3.424064189
26/02/2006 03:00:00	1.047757837	2.834469045
26/02/2006 04:00:00	0.48609006	2.541865688
26/02/2006 05:00:00	0.300000255	2.600002914
26/02/2006 06:00:00	0.525349283	3.038657434
26/02/2006 07:00:00	1.097690826	3.791720932
26/02/2006 08:00:00	1.927502642	4.76911467
26/02/2006 09:00:00	2.925262491	5.88075991
26/02/2006 10:00:00	4.001448132	7.036577916
26/02/2006 11:00:00	5.066537324	8.146489949
26/02/2006 12:00:00	6.031007824	9.120417273
26/02/2006 13:00:00	6.805337394	9.86828115
26/02/2006 14:00:00	7.300003791	10.30000284
26/02/2006 15:00:00	7.448334322	10.34918284
26/02/2006 16:00:00	7.27505129	10.04413521
26/02/2006 17:00:00	6.827724944	9.436851603
26/02/2006 18:00:00	6.153925536	8.57932366
26/02/2006 19:00:00	5.301223316	7.523543024
26/02/2006 20:00:00	4.317188535	6.321501338
26/02/2006 21:00:00	3.249391444	5.025190245
26/02/2006 22:00:00	2.145402294	3.686601387
26/02/2006 23:00:00	1.052791335	2.357726408
27/02/2006 00:00:00	0.019128818	1.090556951
27/02/2006 01:00:00	-0.908015007	-0.062915342
27/02/2006 02:00:00	-1.681069888	-1.050698827
27/02/2006 03:00:00	-2.252465575	-1.820801862
27/02/2006 04:00:00	-2.574631817	-2.321232803
27/02/2006 05:00:00	-2.599998363	-2.500000007
27/02/2006 06:00:00	-2.301128349	-2.326298479
27/02/2006 07:00:00	-1.731115607	-1.854066818
27/02/2006 08:00:00	-0.963185931	-1.158428769
27/02/2006 09:00:00	-0.070565116	-0.314508081
27/02/2006 10:00:00	0.873521043	0.602571499
27/02/2006 11:00:00	1.795846752	1.517686224
27/02/2006 12:00:00	2.623186216	2.355712346
27/02/2006 13:00:00	3.282313641	3.041526117
27/02/2006 14:00:00	3.700003232	3.500003791
27/02/2006 15:00:00	3.822200418	3.67524813
27/02/2006 16:00:00	3.671532804	3.588265196
27/02/2006 17:00:00	3.289797853	3.279286195
27/02/2006 18:00:00	2.718793029	2.788542333
27/02/2006 19:00:00	2.000315796	2.156264815
27/02/2006 20:00:00	1.176163618	1.422684846
27/02/2006 21:00:00	0.288133958	0.628033631
27/02/2006 22:00:00	-0.621975718	-0.187457624
27/02/2006 23:00:00	-1.512367947	-0.983557715
28/02/2006 00:00:00	-2.341245265	-1.720035435
28/02/2006 01:00:00	-3.066810207	-2.35665958
28/02/2006 02:00:00	-3.647265311	-2.853198945
28/02/2006 03:00:00	-4.040813112	-3.169422323
28/02/2006 04:00:00	-4.205656146	-3.26509851
28/02/2006 05:00:00	-4.099996948	-3.099996301
28/02/2006 06:00:00	-3.7003104	-2.652210312
28/02/2006 07:00:00	-3.056158136	-1.973135818
28/02/2006 08:00:00	-2.235372822	-1.132492597
28/02/2006 09:00:00	-1.305787122	-0.200000429
28/02/2006 10:00:00	-0.335233705	0.754620907
28/02/2006 11:00:00	0.608454766	1.661651631
28/02/2006 12:00:00	1.457445623	2.451371964
28/02/2006 13:00:00	2.143906202	3.054062127
28/02/2006 14:00:00	2.600003835	3.400002341
28/02/2006 15:00:00	2.776877849	3.439601017
28/02/2006 16:00:00	2.70155279	3.203776417
28/02/2006 17:00:00	2.420023827	2.743573539
28/02/2006 18:00:00	1.978286124	2.110037382
28/02/2006 19:00:00	1.42233485	1.354212944
28/02/2006 20:00:00	0.798165172	0.527145222
28/02/2006 21:00:00	0.151772256	-0.320120785
28/02/2006 22:00:00	-0.470848731	-1.13654008
28/02/2006 23:00:00	-1.023702621	-1.871067663
01/03/2006 00:00:00	-1.460794248	-2.472658538
01/03/2006 01:00:00	-1.736128445	-2.890267706
01/03/2006 02:00:00	-1.803710044	-3.072850169
01/03/2006 03:00:00	-1.61754388	-2.969360929
01/03/2006 04:00:00	-1.131634784	-2.528754987
01/03/2006 05:00:00	-0.29998759	-1.699987347
01/03/2006 06:00:00	0.899068008	-0.458280822
01/03/2006 07:00:00	2.389906426	1.116074356
01/03/2006 08:00:00	4.072578994	2.916522061
01/03/2006 09:00:00	5.847137045	4.836506167
01/03/2006 10:00:00	7.613631907	6.769470548
01/03/2006 11:00:00	9.272114911	8.608859076
01/03/2006 12:00:00	10.72263739	10.24811563
01/03/2006 13:00:00	11.86525067	11.58068407
01/03/2006 14:00:00	12.60000609	12.50000829
01/03/2006 15:00:00	12.8552483	12.92876503
01/03/2006 16:00:00	12.67249112	12.90655832
01/03/2006 17:00:00	12.12153962	12.5022229
01/03/2006 18:00:00	11.27219887	11.78459351
01/03/2006 19:00:00	10.19427393	10.82250493
01/03/2006 20:00:00	8.957569868	9.684791878
01/03/2006 21:00:00	7.631891756	8.440289125
01/03/2006 22:00:00	6.287044658	7.157831415
01/03/2006 23:00:00	4.992833644	5.906253499
02/03/2006 00:00:00	3.819063779	4.754390128
02/03/2006 01:00:00	2.835540132	3.771076052
02/03/2006 02:00:00	2.11206777	3.025146023
02/03/2006 03:00:00	1.71845176	2.585434789
02/03/2006 04:00:00	1.724497169	2.520777103
02/03/2006 05:00:00	2.200009066	2.900007714
02/03/2006 06:00:00	3.182111827	3.76158207
02/03/2006 07:00:00	4.577211912	5.022442908
02/03/2006 08:00:00	6.259037516	6.569155915
02/03/2006 09:00:00	8.101316832	8.28828678
02/03/2006 10:00:00	9.977778054	10.06640119
02/03/2006 11:00:00	11.76214938	11.79006483
02/03/2006 12:00:00	13.32815899	13.34584339
02/03/2006 13:00:00	14.5495351	14.62030255
02/03/2006 14:00:00	15.30000588	15.50000801
02/03/2006 15:00:00	15.48806117	15.90166286
02/03/2006 16:00:00	15.1612321	15.86251529
02/03/2006 17:00:00	14.40180886	15.44994868
02/03/2006 18:00:00	13.29208163	14.73134638
02/03/2006 19:00:00	11.91434058	13.77409176
02/03/2006 20:00:00	10.35087589	12.64556818
02/03/2006 21:00:00	8.683977749	11.413159
02/03/2006 22:00:00	6.99593633	10.14424759
02/03/2006 23:00:00	5.369041814	8.906217305
03/03/2006 00:00:00	3.885584379	7.76645151
03/03/2006 01:00:00	2.627854205	6.792333567
03/03/2006 02:00:00	1.678141471	6.051246838
03/03/2006 03:00:00	1.118736356	5.610574686
03/03/2006 04:00:00	1.03192904	5.537700473
03/03/2006 05:00:00	1.500009702	5.900007561
03/03/2006 06:00:00	2.568833061	6.735574936
03/03/2006 07:00:00	4.13851748	7.965268492
03/03/2006 08:00:00	6.072748606	9.480651953
03/03/2006 09:00:00	8.235212088	11.17328904
03/03/2006 10:00:00	10.48959357	12.93474349
03/03/2006 11:00:00	12.6995787	14.656579
03/03/2006 12:00:00	14.72885313	16.23035932
03/03/2006 13:00:00	16.4411025	17.54764817
03/03/2006 14:00:00	17.70001246	18.50000926
03/03/2006 15:00:00	18.40444348	19.00752366
03/03/2006 16:00:00	18.59395	19.1043374
03/03/2006 17:00:00	18.34325861	18.8531117
03/03/2006 18:00:00	17.72709592	18.31650777
03/03/2006 19:00:00	16.82018852	17.55718684
03/03/2006 20:00:00	15.69726301	16.6378101
03/03/2006 21:00:00	14.43304598	15.62103877
03/03/2006 22:00:00	13.10226404	14.56953408
03/03/2006 23:00:00	11.77964378	13.54595722
04/03/2006 00:00:00	10.5399118	12.61296942
04/03/2006 01:00:00	9.457794697	11.83323188
04/03/2006 02:00:00	8.608019067	11.26940583
04/03/2006 03:00:00	8.065311507	10.98415248
04/03/2006 04:00:00	7.904398617	11.04013303
04/03/2006 05:00:00	8.200006994	11.5000087
04/03/2006 06:00:00	8.994991342	12.39756008
04/03/2006 07:00:00	10.20472367	13.65104963
04/03/2006 08:00:00	11.71270653	15.1498614
04/03/2006 09:00:00	13.40244248	16.78337943
04/03/2006 10:00:00	15.15743406	18.44098777
04/03/2006 11:00:00	16.86118384	20.01207047
04/03/2006 12:00:00	18.39719436	21.38601157
04/03/2006 13:00:00	19.64896817	22.45219511
04/03/2006 14:00:00	20.50000784	23.10000515
04/03/2006 15:00:00	20.86470317	23.24934727
04/03/2006 16:00:00	20.78098828	22.94220856
04/03/2006 17:00:00	20.31768216	22.25109529
04/03/2006 18:00:00	19.5436038	21.24851376
04/03/2006 19:00:00	18.52757221	20.00697025
04/03/2006 20:00:00	17.33840638	18.59897103
04/03/2006 21:00:00	16.04492532	17.09702239
04/03/2006 22:00:00	14.715948	15.57363061
04/03/2006 23:00:00	13.42029344	14.10130198
05/03/2006 00:00:00	12.22678063	12.75254278
05/03/2006 01:00:00	11.20422857	11.59985929
05/03/2006 02:00:00	10.42145624	10.71575779
05/03/2006 03:00:00	9.947282661	10.17274456
05/03/2006 04:00:00	9.850526816	10.0433259
05/03/2006 05:00:00	10.2000077	10.40000807
05/03/2006 06:00:00	11.03356779	11.28244546
05/03/2006 07:00:00	12.26514818	12.59888991
05/03/2006 08:00:00	13.77771587	14.22474392
05/03/2006 09:00:00	15.45423784	16.03540996
05/03/2006 10:00:00	17.17768107	17.90629053
05/03/2006 11:00:00	18.83101256	19.71278812
05/03/2006 12:00:00	20.29719929	21.33030521
05/03/2006 13:00:00	21.45920824	22.6342443
05/03/2006 14:00:00	22.20000639	23.50000787
05/03/2006 15:00:00	22.43367765	23.83571691
05/03/2006 16:00:00	22.19876874	23.6803613
05/03/2006 17:00:00	21.56494085	23.10564686
05/03/2006 18:00:00	20.60185518	22.1832794
05/03/2006 19:00:00	19.37917294	20.98496474
05/03/2006 20:00:00	17.96655533	19.58240872
05/03/2006 21:00:00	16.43366355	18.04731714
05/03/2006 22:00:00	14.85015879	16.45139583
05/03/2006 23:00:00	13.28570228	14.8663506
06/03/2006 00:00:00	11.80995519	13.36388728
06/03/2006 01:00:00	10.49257874	12.01571169
06/03/2006 02:00:00	9.403234133	10.89352965
06/03/2006 03:00:00	8.611582561	10.06904698
06/03/2006 04:00:00	8.18728523	9.6139695
06/03/2006 05:00:00	8.20000334	9.600003026
06/03/2006 06:00:00	8.688842489	10.06763726
06/03/2006 07:00:00	9.570690662	10.93250231
06/03/2006 08:00:00	10.73188265	12.07901462
06/03/2006 09:00:00	12.05875324	13.39159065
06/03/2006 10:00:00	13.43763721	14.75464684
06/03/2006 11:00:00	14.75486937	16.05259964
06/03/2006 12:00:00	15.89678449	17.1698655
06/03/2006 13:00:00	16.74971737	17.99086086
06/03/2006 14:00:00	17.20000279	18.40000217
06/03/2006 15:00:00	17.16531174	18.31384995
06/03/2006 16:00:00	16.68865504	17.77753584
06/03/2006 17:00:00	15.84437724	16.86833301
06/03/2006 18:00:00	14.70682288	15.66351464
06/03/2006 19:00:00	13.35033651	14.24035388
06/03/2006 20:00:00	11.84926265	12.67612392
06/03/2006 21:00:00	10.27794587	11.04809791
06/03/2006 22:00:00	8.710730689	9.433549033
06/03/2006 23:00:00	7.221961663	7.90975045
07/03/2006 00:00:00	5.885983331	6.553975331
07/03/2006 01:00:00	4.777140235	5.443496845
07/03/2006 02:00:00	3.969776917	4.655588161
07/03/2006 03:00:00	3.53823792	4.267522447
07/03/2006 04:00:00	3.556867786	4.356572873
07/03/2006 05:00:00	4.100011058	5.000012606
07/03/2006 06:00:00	5.207774791	6.239052426
07/03/2006 07:00:00	6.783321568	7.970659315
07/03/2006 08:00:00	8.695579223	10.05574075
07/03/2006 09:00:00	10.81347559	12.3552042
07/03/2006 10:00:00	13.00593849	14.72995715
07/03/2006 11:00:00	15.14189578	17.04090706
07/03/2006 12:00:00	17.09027527	19.14896142
07/03/2006 13:00:00	18.7200048	20.9150277
07/03/2006 14:00:00	19.90001221	22.20001337
07/03/2006 15:00:00	20.53261786	22.90033473
07/03/2006 16:00:00	20.65370695	23.05443768
07/03/2006 17:00:00	20.3325545	22.73627409
07/03/2006 18:00:00	19.63843556	22.01979582
07/03/2006 19:00:00	18.64062516	20.97895474
07/03/2006 20:00:00	17.40839836	19.68770271
07/03/2006 21:00:00	16.01103017	18.21999162
07/03/2006 22:00:00	14.51779565	16.64977331
07/03/2006 23:00:00	12.99796984	15.05099966
08/03/2006 00:00:00	11.52082776	13.49762255
08/03/2006 01:00:00	10.15564447	12.06359382
08/03/2006 02:00:00	8.971695001	10.82286536
08/03/2006 03:00:00	8.03825439	9.84938902
08/03/2006 04:00:00	7.424597679	9.217116681
08/03/2006 05:00:00	7.199999906	9.000000204
08/03/2006 06:00:00	7.406826158	9.243142657
08/03/2006 07:00:00	7.979806077	9.876256577
08/03/2006 08:00:00	8.826761531	10.80020804
08/03/2006 09:00:00	9.855514392	11.91586312
08/03/2006 10:00:00	10.97388653	13.1240879
08/03/2006 11:00:00	12.08969981	14.32574845
08/03/2006 12:00:00	13.11077611	15.42171084
08/03/2006 13:00:00	13.94493729	16.31284115
08/03/2006 14:00:00	14.50000523	16.90000546
08/03/2006 15:00:00	14.70740159	17.10942771
08/03/2006 16:00:00	14.59294341	16.96875913
08/03/2006 17:00:00	14.20604558	16.53100676
08/03/2006 18:00:00	13.59612303	15.84917764
08/03/2006 19:00:00	12.81259063	14.97627881
08/03/2006 20:00:00	11.90486332	13.96531731
08/03/2006 21:00:00	10.92235598	12.86930016
08/03/2006 22:00:00	9.914483526	11.74123441
08/03/2006 23:00:00	8.930660862	10.63412709
09/03/2006 00:00:00	8.020302892	9.600985249
09/03/2006 01:00:00	7.232824522	8.694815911
09/03/2006 02:00:00	6.617640656	7.968626117
09/03/2006 03:00:00	6.2241662	7.475422905
09/03/2006 04:00:00	6.101816059	7.268213311
09/03/2006 05:00:00	6.300005138	7.400004371
09/03/2006 06:00:00	6.846115402	7.900911602
09/03/2006 07:00:00	7.67940068	8.709488204
09/03/2006 08:00:00	8.717083671	9.741397738
09/03/2006 09:00:00	9.876387078	10.91230377
09/03/2006 10:00:00	11.0745336	12.13786985
09/03/2006 11:00:00	12.22874594	13.33375954
09/03/2006 12:00:00	13.25624679	14.41563642
09/03/2006 13:00:00	14.07425886	15.29916403
09/03/2006 14:00:00	14.60000485	15.90000594
09/03/2006 15:00:00	14.77366369	16.15618463
09/03/2006 16:00:00	14.62723548	16.09515455
09/03/2006 17:00:00	14.21567464	15.76672722
09/03/2006 18:00:00	13.59393561	15.22071417
09/03/2006 19:00:00	12.81697282	14.5069269
09/03/2006 20:00:00	11.93974069	13.67517695
09/03/2006 21:00:00	11.01719366	12.77527583
09/03/2006 22:00:00	10.10428616	11.85703506
09/03/2006 23:00:00	9.255972624	10.97026617
10/03/2006 00:00:00	8.527207473	10.16478067
10/03/2006 01:00:00	7.972945142	9.490390096
10/03/2006 02:00:00	7.648140061	8.996905955
10/03/2006 03:00:00	7.607746662	8.734139772
10/03/2006 04:00:00	7.906719374	8.751903068
10/03/2006 05:00:00	8.600012628	9.100007363
10/03/2006 06:00:00	9.71534864	9.80588038
10/03/2006 07:00:00	11.1715253	10.80741838
10/03/2006 08:00:00	12.86011056	12.02013569
10/03/2006 09:00:00	14.67267237	13.35954663
10/03/2006 10:00:00	16.50077868	14.74116555
10/03/2006 11:00:00	18.23599743	16.08050675
10/03/2006 12:00:00	19.76989657	17.29308457
10/03/2006 13:00:00	20.99404406	18.29441335
10/03/2006 14:00:00	21.80000783	19.0000074
10/03/2006 15:00:00	22.10849073	19.3471462
10/03/2006 16:00:00	21.95673021	19.36016618
10/03/2006 17:00:00	21.4110962	19.0851671
10/03/2006 18:00:00	20.53795859	18.56824869
10/03/2006 19:00:00	19.4036873	17.85551072
10/03/2006 20:00:00	18.07465223	16.99305293
10/03/2006 21:00:00	16.6172233	16.02697508
10/03/2006 22:00:00	15.09777042	15.00337692
10/03/2006 23:00:00	13.58266348	13.9683582
11/03/2006 00:00:00	12.13827241	12.96801867
11/03/2006 01:00:00	10.83096711	12.04845808
11/03/2006 02:00:00	9.727117494	11.25577619
11/03/2006 03:00:00	8.893093463	10.63607274
11/03/2006 04:00:00	8.39526493	10.23544748
11/03/2006 05:00:00	8.300001805	10.10000018
11/03/2006 06:00:00	8.645676911	10.25618588
11/03/2006 07:00:00	9.358679461	10.6518842
11/03/2006 08:00:00	10.33740395	11.21533172
11/03/2006 09:00:00	11.48024487	11.87476503
11/03/2006 10:00:00	12.68559672	12.55842071
11/03/2006 11:00:00	13.851854	13.19453533
11/03/2006 12:00:00	14.87741119	13.71134548
11/03/2006 13:00:00	15.6606628	14.03708774
11/03/2006 14:00:00	16.10000331	14.09999869
11/03/2006 15:00:00	16.12036782	13.8483143
11/03/2006 16:00:00	15.7528493	13.31026462
11/03/2006 17:00:00	15.05507906	12.53407742
11/03/2006 18:00:00	14.08468842	11.56798044
11/03/2006 19:00:00	12.8993087	10.46020143
11/03/2006 20:00:00	11.55657119	9.258968135
11/03/2006 21:00:00	10.11410723	8.012508311
11/03/2006 22:00:00	8.629548112	6.769049705
11/03/2006 23:00:00	7.160525162	5.576820065
12/03/2006 00:00:00	5.764669692	4.484047142
12/03/2006 01:00:00	4.499613013	3.538958684
12/03/2006 02:00:00	3.42298644	2.78978244
12/03/2006 03:00:00	2.592421286	2.28474616
12/03/2006 04:00:00	2.065548865	2.072077593
12/03/2006 05:00:00	1.90000049	2.200004488
12/03/2006 06:00:00	2.129018603	2.694070991
12/03/2006 07:00:00	2.688294335	3.48909072
12/03/2006 08:00:00	3.489132033	4.497195634
12/03/2006 09:00:00	4.442836048	5.630517691
12/03/2006 10:00:00	5.460710727	6.801188849
12/03/2006 11:00:00	6.454060418	7.921341066
12/03/2006 12:00:00	7.334189471	8.903106302
12/03/2006 13:00:00	8.012402233	9.658616514
12/03/2006 14:00:00	8.400003053	10.10000366
12/03/2006 15:00:00	8.432170564	10.163556
12/03/2006 16:00:00	8.139576421	9.882182827
12/03/2006 17:00:00	7.57676451	9.312947657
12/03/2006 18:00:00	6.798278714	8.512914005
12/03/2006 19:00:00	5.858662918	7.539145387
12/03/2006 20:00:00	4.812461007	6.448705317
12/03/2006 21:00:00	3.714216865	5.29865731
12/03/2006 22:00:00	2.618474376	4.146064881
12/03/2006 23:00:00	1.579777425	3.047991545
13/03/2006 00:00:00	0.652669897	2.061500818
13/03/2006 01:00:00	-0.108304326	1.243656214
13/03/2006 02:00:00	-0.648601357	0.651521249
13/03/2006 03:00:00	-0.913677312	0.342159436
13/03/2006 04:00:00	-0.848988307	0.372634293
13/03/2006 05:00:00	-0.399990458	0.800009332
13/03/2006 06:00:00	0.46202288	1.654704566
13/03/2006 07:00:00	1.662413876	2.860570619
13/03/2006 08:00:00	3.100709704	4.314816922
13/03/2006 09:00:00	4.676437539	5.914652909
13/03/2006 10:00:00	6.289124551	7.557288013
13/03/2006 11:00:00	7.838297915	9.139931666
13/03/2006 12:00:00	9.223484804	10.5597933
13/03/2006 13:00:00	10.34421239	11.71408235
13/03/2006 14:00:00	11.10000785	12.50000825
13/03/2006 15:00:00	11.41768138	12.84237038
13/03/2006 16:00:00	11.33317049	12.77632308
13/03/2006 17:00:00	10.90969334	12.36460824
13/03/2006 18:00:00	10.21046811	11.66996775
13/03/2006 19:00:00	9.29871293	10.75514348
13/03/2006 20:00:00	8.237645979	9.682877332
13/03/2006 21:00:00	7.090485411	8.515911181
13/03/2006 22:00:00	5.920449387	7.316986915
13/03/2006 23:00:00	4.790756066	6.14884642
14/03/2006 00:00:00	3.764623607	5.07423158
14/03/2006 01:00:00	2.90527017	4.155884281
14/03/2006 02:00:00	2.275913915	3.456546407
14/03/2006 03:00:00	1.939773001	3.038959844
14/03/2006 04:00:00	1.960065589	2.965866478
14/03/2006 05:00:00	2.400009837	3.300008192
14/03/2006 06:00:00	3.295010998	4.077122715
14/03/2006 07:00:00	4.569227585	5.224935887
14/03/2006 08:00:00	6.119007651	6.644171769
14/03/2006 09:00:00	7.840699249	8.235554421
14/03/2006 10:00:00	9.630650431	9.899807902
14/03/2006 11:00:00	11.38520925	11.53765627
14/03/2006 12:00:00	13.00072376	13.04982359
14/03/2006 13:00:00	14.37354202	14.33703392
14/03/2006 14:00:00	15.40001207	15.30001131
14/03/2006 15:00:00	16.00295655	15.86453892
14/03/2006 16:00:00	16.21109179	16.05663179
14/03/2006 17:00:00	16.07960634	15.92736185
14/03/2006 18:00:00	15.66368877	15.52780102
14/03/2006 19:00:00	15.01852764	14.90902121
14/03/2006 20:00:00	14.19931151	14.12209435
14/03/2006 21:00:00	13.26122894	13.21809237
14/03/2006 22:00:00	12.25946849	12.24808717
14/03/2006 23:00:00	11.24921874	11.26315069
15/03/2006 00:00:00	10.28566823	10.31435485
15/03/2006 01:00:00	9.424005536	9.452771559
15/03/2006 02:00:00	8.719419216	8.729472747
15/03/2006 03:00:00	8.227097832	8.195530333
15/03/2006 04:00:00	8.002229947	7.90201624
15/03/2006 05:00:00	8.100004122	7.900002388
15/03/2006 06:00:00	8.552007198	8.219261839
15/03/2006 07:00:00	9.295423328	8.804376013
15/03/2006 08:00:00	10.24383705	9.57862937
15/03/2006 09:00:00	11.31083289	10.46530637
15/03/2006 10:00:00	12.40999539	11.38769147
15/03/2006 11:00:00	13.45490908	12.26906912
15/03/2006 12:00:00	14.3591585	13.0327238
15/03/2006 13:00:00	15.03632818	13.60193995
15/03/2006 14:00:00	15.40000266	13.90000204
15/03/2006 15:00:00	15.38824952	13.87192407
15/03/2006 16:00:00	15.03706415	13.54963431
15/03/2006 17:00:00	14.4069228	12.98678862
15/03/2006 18:00:00	13.55830172	12.23704288
15/03/2006 19:00:00	12.55167715	11.35405296
15/03/2006 20:00:00	11.44752536	10.39147471
15/03/2006 21:00:00	10.30632258	9.402964019
15/03/2006 22:00:00	9.188545071	8.442176741
15/03/2006 23:00:00	8.154669072	7.562768747
16/03/2006 00:00:00	7.265170835	6.818395907
16/03/2006 01:00:00	6.58052661	6.262714087
16/03/2006 02:00:00	6.161212644	5.949379156
16/03/2006 03:00:00	6.067705187	5.932046982
16/03/2006 04:00:00	6.360480487	6.264373432
16/03/2006 05:00:00	7.100014793	7.000014374
16/03/2006 06:00:00	8.315866032	8.165432344
16/03/2006 07:00:00	9.913924424	9.678321459
16/03/2006 08:00:00	11.76916466	11.42918496
16/03/2006 09:00:00	13.75656142	13.30852609
16/03/2006 10:00:00	15.75108941	15.20684809
16/03/2006 11:00:00	17.6277233	17.0146542
16/03/2006 12:00:00	19.26143779	18.62244765
16/03/2006 13:00:00	20.52720757	19.9207317
16/03/2006 14:00:00	21.30000733	20.80000958
16/03/2006 15:00:00	21.48938555	21.17992631
16/03/2006 16:00:00	21.14317961	21.09668878
16/03/2006 17:00:00	20.34379759	20.615643
16/03/2006 18:00:00	19.17364751	19.80213499
16/03/2006 19:00:00	17.71513742	18.72151076
16/03/2006 20:00:00	16.05067539	17.43911635
16/03/2006 21:00:00	14.26266946	16.02029776
16/03/2006 22:00:00	12.43352767	14.53040101
16/03/2006 23:00:00	10.64565808	13.03477212
17/03/2006 00:00:00	8.981468733	11.59875711
17/03/2006 01:00:00	7.52336768	10.28770199
17/03/2006 02:00:00	6.353762972	9.166952796
17/03/2006 03:00:00	5.555062657	8.301855531
17/03/2006 04:00:00	5.209674784	7.757756217
17/03/2006 05:00:00	5.400007401	7.600000872
17/03/2006 06:00:00	6.174286465	7.867805827
17/03/2006 07:00:00	7.444015798	8.495873442
17/03/2006 08:00:00	9.086520257	9.392778779
17/03/2006 09:00:00	10.9791247	10.4670969
17/03/2006 10:00:00	12.99915397	11.62740287
17/03/2006 11:00:00	15.02393294	12.78227174
17/03/2006 12:00:00	16.93078645	13.84027858
17/03/2006 13:00:00	18.59703937	14.70999846
17/03/2006 14:00:00	19.90001654	15.30000643
17/03/2006 15:00:00	20.74663447	15.54251835
17/03/2006 16:00:00	21.16217079	15.46430892
17/03/2006 17:00:00	21.20149205	15.11579148
17/03/2006 18:00:00	20.91946481	14.54737934
17/03/2006 19:00:00	20.37095563	13.80948585
17/03/2006 20:00:00	19.61083106	12.95252432
17/03/2006 21:00:00	18.69395767	12.02690808
17/03/2006 22:00:00	17.675202	11.08305046
17/03/2006 23:00:00	16.60943061	10.1713648
18/03/2006 00:00:00	15.55151007	9.342264408
18/03/2006 01:00:00	14.55630692	8.646162624
18/03/2006 02:00:00	13.67868773	8.133472772
18/03/2006 03:00:00	12.97351905	7.85460818
18/03/2006 04:00:00	12.49566743	7.859982176
18/03/2006 05:00:00	12.29999944	8.200008089
18/03/2006 06:00:00	12.42040651	8.901040952
18/03/2006 07:00:00	12.80688351	9.893207085
18/03/2006 08:00:00	13.38845211	11.08257674
18/03/2006 09:00:00	14.09413401	12.37522018
18/03/2006 10:00:00	14.85295089	13.67720764
18/03/2006 11:00:00	15.59392443	14.89460939
18/03/2006 12:00:00	16.24607632	15.93349568
18/03/2006 13:00:00	16.73842825	16.69993675
18/03/2006 14:00:00	17.0000019	17.10000288
18/03/2006 15:00:00	16.97885239	17.06644286
18/03/2006 16:00:00	16.69916502	16.63871481
18/03/2006 17:00:00	16.20415678	15.8829529
18/03/2006 18:00:00	15.53704463	14.86529131
18/03/2006 19:00:00	14.74104555	13.65186423
18/03/2006 20:00:00	13.8593765	12.30880584
18/03/2006 21:00:00	12.93525446	10.90225032
18/03/2006 22:00:00	12.01189641	9.498331856
18/03/2006 23:00:00	11.1325193	8.16318462
19/03/2006 00:00:00	10.34034013	6.962942799
19/03/2006 01:00:00	9.678575849	5.963740574
19/03/2006 02:00:00	9.190443441	5.231712127
19/03/2006 03:00:00	8.919159875	4.832991639
19/03/2006 04:00:00	8.907942123	4.833713292
19/03/2006 05:00:00	9.200007158	5.300011267
19/03/2006 06:00:00	9.81702494	6.267621011
19/03/2006 07:00:00	10.69448142	7.650688725
19/03/2006 08:00:00	11.74631757	9.332964728
19/03/2006 09:00:00	12.88647436	11.19819934
19/03/2006 10:00:00	14.02889273	13.13014286
19/03/2006 11:00:00	15.08751366	15.01254563
19/03/2006 12:00:00	15.97627811	16.72915795
19/03/2006 13:00:00	16.60912705	18.16373015
19/03/2006 14:00:00	16.90000143	19.20001253
19/03/2006 15:00:00	16.78773043	19.75224574
19/03/2006 16:00:00	16.31069132	19.85662598
19/03/2006 17:00:00	15.53214724	19.5798369
19/03/2006 18:00:00	14.51536132	18.98856214
19/03/2006 19:00:00	13.32359671	18.14948536
19/03/2006 20:00:00	12.02011654	17.1292902
19/03/2006 21:00:00	10.66818395	15.99466033
19/03/2006 22:00:00	9.331062069	14.81227937
19/03/2006 23:00:00	8.072014043	13.64883099
20/03/2006 00:00:00	6.954303007	12.57099884
20/03/2006 01:00:00	6.041192097	11.64546656
20/03/2006 02:00:00	5.39594445	10.93891781
20/03/2006 03:00:00	5.081823204	10.51803624
20/03/2006 04:00:00	5.162091495	10.44950549
20/03/2006 05:00:00	5.70001246	10.80000921
20/03/2006 06:00:00	6.728430837	11.60644394
20/03/2006 07:00:00	8.158523532	12.78656343
20/03/2006 08:00:00	9.871051937	14.22833711
20/03/2006 09:00:00	11.74677744	15.81973444
20/03/2006 10:00:00	13.66646145	17.44872488
20/03/2006 11:00:00	15.51086534	19.00327786
20/03/2006 12:00:00	17.16075052	20.37136284
20/03/2006 13:00:00	18.49687836	21.44094928
20/03/2006 14:00:00	19.40001028	22.10000662
20/03/2006 15:00:00	19.78302605	22.2668637
20/03/2006 16:00:00	19.68727297	21.98128118
20/03/2006 17:00:00	19.18621366	21.31337621
20/03/2006 18:00:00	18.35331073	20.33326593
20/03/2006 19:00:00	17.26202681	19.1110675
20/03/2006 20:00:00	15.98582453	17.71689806
20/03/2006 21:00:00	14.59816649	16.22087476
20/03/2006 22:00:00	13.17251534	14.69311476
20/03/2006 23:00:00	11.78233368	13.20373519
21/03/2006 00:00:00	10.50108414	11.82285322
21/03/2006 01:00:00	9.402229351	10.62058599
21/03/2006 02:00:00	8.559231923	9.667050648
21/03/2006 03:00:00	8.045554482	9.032364348
21/03/2006 04:00:00	7.934659651	8.786644237
21/03/2006 05:00:00	8.300010052	9.000007464
21/03/2006 06:00:00	9.183186948	9.712462427
21/03/2006 07:00:00	10.49825229	10.84358829
21/03/2006 08:00:00	12.12738973	12.28285836
21/03/2006 09:00:00	13.95278291	13.91974594
21/03/2006 10:00:00	15.8566155	15.64372433
21/03/2006 11:00:00	17.72107114	17.34426683
21/03/2006 12:00:00	19.42833349	18.91084676
21/03/2006 13:00:00	20.8605862	20.23293742
21/03/2006 14:00:00	21.90001292	21.2000121
21/03/2006 15:00:00	22.45868394	21.72935395
21/03/2006 16:00:00	22.56821025	21.84948003
21/03/2006 17:00:00	22.29008664	21.61671455
21/03/2006 18:00:00	21.68580785	21.08738174
21/03/2006 19:00:00	20.81686865	20.3178058
21/03/2006 20:00:00	19.7447638	19.36431095
21/03/2006 21:00:00	18.53098805	18.2832214
21/03/2006 22:00:00	17.23703616	17.13086137
21/03/2006 23:00:00	15.9244029	15.96355508
22/03/2006 00:00:00	14.65458303	14.83762673
22/03/2006 01:00:00	13.4890713	13.80940055
22/03/2006 02:00:00	12.48936247	12.93520074
22/03/2006 03:00:00	11.71695131	12.27135152
22/03/2006 04:00:00	11.23333257	11.87417711
22/03/2006 05:00:00	11.10000101	11.80000172
22/03/2006 06:00:00	11.35278557	12.08160825
22/03/2006 07:00:00	11.9248569	12.65761896
22/03/2006 08:00:00	12.72372232	13.44311705
22/03/2006 09:00:00	13.65688913	14.35318576
22/03/2006 10:00:00	14.63186467	15.30290831
22/03/2006 11:00:00	15.55615624	16.20736791
22/03/2006 12:00:00	16.33727117	16.9816478
22/03/2006 13:00:00	16.88271677	17.5408312
22/03/2006 14:00:00	17.10000036	17.80000132
22/03/2006 15:00:00	16.92253125	17.69769652
22/03/2006 16:00:00	16.38732164	17.26627109
22/03/2006 17:00:00	15.55728316	16.56153217
22/03/2006 18:00:00	14.49532749	15.6392869
22/03/2006 19:00:00	13.26436627	14.5553424
22/03/2006 20:00:00	11.92731116	13.36550581
22/03/2006 21:00:00	10.54707382	12.12558426
22/03/2006 22:00:00	9.186565884	10.89138489
22/03/2006 23:00:00	7.908699023	9.718714841
23/03/2006 00:00:00	6.776384885	8.663381233
23/03/2006 01:00:00	5.852535126	7.781191207
23/03/2006 02:00:00	5.200061399	7.127951896
23/03/2006 03:00:00	4.881875359	6.759470434
23/03/2006 04:00:00	4.960888658	6.731553955
23/03/2006 05:00:00	5.500012952	7.100009593
23/03/2006 06:00:00	6.531517211	7.894084989
23/03/2006 07:00:00	7.965105703	9.036795027
23/03/2006 08:00:00	9.679843025	10.42459771
23/03/2006 09:00:00	11.55479377	11.95395105
23/03/2006 10:00:00	13.46902255	13.52131304
23/03/2006 11:00:00	15.30159395	15.02314168
23/03/2006 12:00:00	16.93157257	16.35589499
23/03/2006 13:00:00	18.23802301	17.41603096
23/03/2006 14:00:00	19.10000987	18.1000076
23/03/2006 15:00:00	19.42950056	18.33281401
23/03/2006 16:00:00	19.2700673	18.15355808
23/03/2006 17:00:00	18.69818185	17.62987598
23/03/2006 18:00:00	17.79031598	16.82940387
23/03/2006 19:00:00	16.62294149	15.81977792
23/03/2006 20:00:00	15.27253013	14.66863431
23/03/2006 21:00:00	13.81555368	13.4436092
23/03/2006 22:00:00	12.32848392	12.21233875
23/03/2006 23:00:00	10.88779263	11.04245915
24/03/2006 00:00:00	9.569951573	10.00160654
24/03/2006 01:00:00	8.451432528	9.157417115
24/03/2006 02:00:00	7.608707271	8.57752703
24/03/2006 03:00:00	7.118247575	8.329572455
24/03/2006 04:00:00	7.056525215	8.481189559
24/03/2006 05:00:00	7.500011967	9.100014511
24/03/2006 06:00:00	8.491510583	10.22164674
24/03/2006 07:00:00	9.939154432	11.7535451
24/03/2006 08:00:00	11.71741121	13.5711349
24/03/2006 09:00:00	13.70074862	15.54984143
24/03/2006 10:00:00	15.76363436	17.56509
24/03/2006 11:00:00	17.78053612	19.49230591
24/03/2006 12:00:00	19.62592161	21.20691446
24/03/2006 13:00:00	21.17425851	22.58434096
24/03/2006 14:00:00	22.30001453	23.50001071
24/03/2006 15:00:00	22.91001009	23.86279844
24/03/2006 16:00:00	23.04046998	23.71536991
24/03/2006 17:00:00	22.75996851	23.13383696
24/03/2006 18:00:00	22.13707996	22.19431142
24/03/2006 19:00:00	21.24037862	20.97290514
24/03/2006 20:00:00	20.13843879	19.54572997
24/03/2006 21:00:00	18.89983476	17.98889774
24/03/2006 22:00:00	17.59314081	16.3785203
24/03/2006 23:00:00	16.28693124	14.79070948
25/03/2006 00:00:00	15.04978035	13.30157714
25/03/2006 01:00:00	13.95026242	11.9872351
25/03/2006 02:00:00	13.05695174	10.92379522
25/03/2006 03:00:00	12.4384226	10.18736933
25/03/2006 04:00:00	12.1632493	9.854069272
25/03/2006 05:00:00	12.30000613	10.00000689
25/03/2006 06:00:00	12.8879349	10.66914228
[truncated: 6,761 more rows]
