# Supplementary material for: Flood Prediction in Ungauged Basins by Physical-Based TOPKAPI Model
Source: Hindawi journal article supplement (doi:10.1155/2019/4795853), 2019-09-05
Supplement: f1 [file 4795853.f1.zip › 4795853.f1/xxpre_ele_2004.csv]

00/01/1900 00:00:00	50220150	50220550	50220700	50220850	50221900	50222450	50223650	50223900	50224350	50224650	50224750	50225350	50227850
01/01/2004 00:00:00	0	0	0	0	0	0	0	0	0	0	0	0	0
01/01/2004 01:00:00	0	0	0	0	0	0	0	0	0	0	0	0	0
01/01/2004 02:00:00	0	0	0	0	0	0	0	0	0	0	0	0	0
01/01/2004 03:00:00	0	0	0	0	0	0	0	0	0	0	0	0	0
01/01/2004 04:00:00	0	0	0	0	0	0	0	0	0	0	0	0	0
01/01/2004 05:00:00	0	0	0	0	0	0	0	0	0	0	0	0	0
01/01/2004 06:00:00	0	0	0	0	0	0	0	0	0	0	0	0	0
01/01/2004 07:00:00	0	0	0	0	0	0	0	0	0	0	0	0	0
01/01/2004 08:00:00	0	0	0	0	0	0	0	0	0	0	0	0	0
01/01/2004 09:00:00	0	0	0	0	0	0	0	0	0	0	0	0	0
01/01/2004 10:00:00	0	0	0	0	0	0	0	0	0	0	0	0	0
01/01/2004 11:00:00	0	0	0	0	0	0	0	0	0	0	0	0	0
01/01/2004 12:00:00	0	0	0	0	0	0	0	0	0	0	0	0	0
01/01/2004 13:00:00	0	0	0	0	0	0	0	0	0	0	0	0	0
01/01/2004 14:00:00	0	0	0	0	0	0	0	0	0	0	0	0	0
01/01/2004 15:00:00	0	0	0	0	0	0	0	0	0	0	0	0	0
01/01/2004 16:00:00	0	0	0	0	0	0	0	0	0	0	0	0	0
01/01/2004 17:00:00	0	0	0	0	0	0	0	0	0	0	0	0	0
01/01/2004 18:00:00	0	0	0	0	0	0	0	0	0	0	0	0	0
01/01/2004 19:00:00	0	0	0	0	0	0	0	0	0	0	0	0	0
01/01/2004 20:00:00	0	0	0	0	0	0	0	0	0	0	0	0	0
01/01/2004 21:00:00	0	0	0	0	0	0	0	0	0	0	0	0	0
01/01/2004 22:00:00	0	0	0	0	0	0	0	0	0	0	0	0	0
01/01/2004 23:00:00	0	0	0	0	0	0	0	0	0	0	0	0	0
02/01/2004 00:00:00	0	0	0	0	0	0	0	0	0	0	0	0	0
02/01/2004 01:00:00	0	0	0	0	0	0	0	0	0	0	0	0	0
02/01/2004 02:00:00	0	0	0	0	0	0	0	0	0	0	0	0	0
02/01/2004 03:00:00	0	0	0	0	0	0	0	0	0	0	0	0	0
02/01/2004 04:00:00	0	0	0	0	0	0	0	0	0	0	0	0	0
02/01/2004 05:00:00	0	0	0	0	0	0	0	0	0	0	0	0	0
02/01/2004 06:00:00	0	0	0	0	0	0	0	0	0	0	0	0	0
02/01/2004 07:00:00	0	0	0	0	0	0	0	0	0	0	0	0	0
02/01/2004 08:00:00	0	0	0	0	0	0	0	0	0	0	0	0	0
02/01/2004 09:00:00	0	0	0	0	0	0	0	0	0	0	0	0	0
02/01/2004 10:00:00	0	0	0	0	0	0	0	0	0	0	0	0	0
02/01/2004 11:00:00	0	0	0	0	0	0	0	0	0	0	0	0	0
02/01/2004 12:00:00	0	0	0	0	0	0	0	0	0	0	0	0	0
02/01/2004 13:00:00	0	0	0	0	0	0	0	0	0	0	0	0	0
02/01/2004 14:00:00	0	0	0	0	0	0	0	0	0	0	0	0	0
02/01/2004 15:00:00	0	0	0	0	0	0	0	0	0	0	0	0	0
02/01/2004 16:00:00	0	0	0	0	0	0	0	0	0	0	0	0	0
02/01/2004 17:00:00	0	0	0	0	0	0	0	0	0	0	0	0	0
02/01/2004 18:00:00	0	0	0	0	0	0	0	0	0	0	0	0	0
02/01/2004 19:00:00	0	0	0	0	0	0	0	0	0	0	0	0	0
02/01/2004 20:00:00	0	0	0	0	0	0	0	0	0	0	0	0	0
02/01/2004 21:00:00	0	0	0	0	0	0	0	0	0	0	0	0	0
02/01/2004 22:00:00	0	0	0	0	0	0	0	0	0	0	0	0	0
02/01/2004 23:00:00	0	0	0	0	0	0	0	0	0	0	0	0	0
03/01/2004 00:00:00	0	0	0	0	0	0	0	0	0	0	0	0	0
03/01/2004 01:00:00	0	0	0	0	0	0	0	0	0	0	0	0	0
03/01/2004 02:00:00	0	0	0	0	0	0	0	0	0	0	0	0	0
03/01/2004 03:00:00	0	0	0	0	0	0	0	0	0	0	0	0	0
03/01/2004 04:00:00	0	0	0	0	0	0	0	0	0	0	0	0	0
03/01/2004 05:00:00	0	0	0	0	0	0	0	0	0	0	0	0	0
03/01/2004 06:00:00	0	0	0	0	0	0	0	0	0	0	0	0	0
03/01/2004 07:00:00	0	0	0	0	0	0	0	0	0	0	0	0	0
03/01/2004 08:00:00	0	0	0	0	0	0	0	0	0	0	0	0	0
03/01/2004 09:00:00	0	0	0	0	0	0	0	0	0	0	0	0	0
03/01/2004 10:00:00	0	0	0	0	0	0	0	0	0	0	0	0	0
03/01/2004 11:00:00	0	0	0	0	0	0	0	0	0	0	0	0	0
03/01/2004 12:00:00	0	0	0	0	0	0	0	0	0	0	0	0	0
03/01/2004 13:00:00	0	0	0	0	0	0	0	0	0	0	0	0	0
03/01/2004 14:00:00	0	0	0	0	0	0	0	0	0	0	0	0	0
03/01/2004 15:00:00	0	0	0	0	0	0	0	0	0	0	0	0	0
03/01/2004 16:00:00	0	0	0	0	0	0	0	0	0	0	0	0	0
03/01/2004 17:00:00	0	0	0	0	0	0	0	0	0	0	0	0	0
03/01/2004 18:00:00	0	0	0	0	0	0	0	0	0	0	0	0	0
03/01/2004 19:00:00	0	0	0	0	0	0	0	0	0	0	0	0	0
03/01/2004 20:00:00	0	0	0	0	0	0	0	0	0	0	0	0	0
03/01/2004 21:00:00	0	0	0	0	0	0	0	0	0	0	0	0	0
03/01/2004 22:00:00	0	0	0	0	0	0	0	0	0	0	0	0	0
03/01/2004 23:00:00	0	0	0	0	0	0	0	0	0	0	0	0	0
04/01/2004 00:00:00	0	0	0	0	0	0	0	0	0	0	0	0	0
04/01/2004 01:00:00	0	0	0	0	0	0	0	0	0	0	0	0	0
04/01/2004 02:00:00	0	0	0	0	0	0	0	0	0	0	0	0	0
04/01/2004 03:00:00	0	0	0	0	0	0	0	0	0	0	0	0	0
04/01/2004 04:00:00	0	0	0	0	0	0	0	0	0	0	0	0	0
04/01/2004 05:00:00	0	0	0	0	0	0	0	0	0	0	0	0	0
04/01/2004 06:00:00	0	0	0	0	0	0	0	0	0	0	0	0	0
04/01/2004 07:00:00	0	0	0	0	0	0	0	0	0	0	0	0	0
04/01/2004 08:00:00	0	0	0	0	0	0	0	0	0	0	0	0	0
04/01/2004 09:00:00	0	0	0	0	0	0	0	0	0	0	0	0	0
04/01/2004 10:00:00	0	0	0	0	0	0	0	0	0	0	0	0	0
04/01/2004 11:00:00	0	0	0	0	0	0	0	0	0	0	0	0	0
04/01/2004 12:00:00	0	0	0	0	0	0	0	0	0	0	0	0	0
04/01/2004 13:00:00	0	0	0	0	0	0	0	0	0	0	0	0	0
04/01/2004 14:00:00	0	0	0	0	0	0	0	0	0	0	0	0	0
04/01/2004 15:00:00	0	0	0	0	0	0	0	0	0	0	0	0	0
04/01/2004 16:00:00	0	0	0	0	0	0	0	0	0	0	0	0	0
04/01/2004 17:00:00	0	0	0	0	0	0	0	0	0	0	0	0	0
04/01/2004 18:00:00	0	0	0	0	0	0	0	0	0	0	0	0	0
04/01/2004 19:00:00	0	0	0	0	0	0	0	0	0	0	0	0	0
04/01/2004 20:00:00	0	0	0	0	0	0	0	0	0	0	0	0	0
04/01/2004 21:00:00	0	0	0	0	0	0	0	0	0	0	0	0	0
04/01/2004 22:00:00	0	0	0	0	0	0	0	0	0	0	0	0	0
04/01/2004 23:00:00	0	0	0	0	0	0	0	0	0	0	0	0	0
05/01/2004 00:00:00	0	0	0	0	0	0	0	0	0	0	0	0	0
05/01/2004 01:00:00	0	0	0	0	0	0	0	0	0	0	0	0	0
05/01/2004 02:00:00	0	0	0	0	0	0	0	0	0	0	0	0	0
05/01/2004 03:00:00	0	0	0	0	0	0	0	0	0	0	0	0	0
05/01/2004 04:00:00	0	0	0	0	0	0	0	0	0	0	0	0	0
05/01/2004 05:00:00	0	0	0	0	0	0	0	0	0	0	0	0	0
05/01/2004 06:00:00	0	0	0	0	0	0	0	0	0	0	0	0	0
05/01/2004 07:00:00	0	0	0	0	0	0	0	0	0	0	0	0	0
05/01/2004 08:00:00	0	0	0	0	0	0	0	0	0	0	0	0	0
05/01/2004 09:00:00	0	0	0	0	0	0	0	0	0	0	0	0	0
05/01/2004 10:00:00	0	0	0	0	0	0	0	0	0	0	0	0	0
05/01/2004 11:00:00	0	0	0	0	0	0	0	0	0	0	0	0	0
05/01/2004 12:00:00	0	0	0	0	0	0	0	0	0	0	0	0	0
05/01/2004 13:00:00	0	0	0	0	0	0	0	0	0	0	0	0	0
05/01/2004 14:00:00	0	0	0	0	0	0	0	0	0	0	0	0	0
05/01/2004 15:00:00	0	0	0	0	0	0	0	0	0	0	0	0	0
05/01/2004 16:00:00	0	0	0	0	0	0	0	0	0	0	0	0	0
05/01/2004 17:00:00	0	0	0	0	0	0	0	0	0	0	0	0	0
05/01/2004 18:00:00	0	0	0	0	0	0	0	0	0	0	0	0	0
05/01/2004 19:00:00	0	0	0	0	0	0	0	0	0	0	0	0	0
05/01/2004 20:00:00	0	0	0	0	0	0	0	0	0	0	0	0	0
05/01/2004 21:00:00	0	0	0	0	0	0	0	0	0	0	0	0	0
05/01/2004 22:00:00	0	0	0	0	0	0	0	0	0	0	0	0	0
05/01/2004 23:00:00	0	0	0	0	0	0	0	0	0	0	0	0	0
06/01/2004 00:00:00	0	0	0	0	0	0	0	0	0	0	0	0	0
06/01/2004 01:00:00	0	0	0	0	0	0	0	0	0	0	0	0	0
06/01/2004 02:00:00	0	0	0	0	0	0	0	0	0	0	0	0	0
06/01/2004 03:00:00	0	0	0	0	0	0	0	0	0	0	0	0	0
06/01/2004 04:00:00	0	0	0	0	0	0	0	0	0	0	0	0	0
06/01/2004 05:00:00	0	0	0	0	0	0	0	0	0	0	0	0	0
06/01/2004 06:00:00	0	0	0	0	0	0	0	0	0	0	0	0	0
06/01/2004 07:00:00	0	0	0	0	0	0	0	0	0	0	0	0	0
06/01/2004 08:00:00	0	0	0	0	0	0	0	0	0	0	0	0	0
06/01/2004 09:00:00	0	0	0	0	0	0	0	0	0	0	0	0	0
06/01/2004 10:00:00	0	0	0	0	0	0	0	0	0	0	0	0	0
06/01/2004 11:00:00	0	0	0	0	0	0	0	0	0	0	0	0	0
06/01/2004 12:00:00	0	0	0	0	0	0	0	0	0	0	0	0	0
06/01/2004 13:00:00	0	0	0	0	0	0	0	0	0	0	0	0	0
06/01/2004 14:00:00	0	0	0	0	0	0	0	0	0	0	0	0	0
06/01/2004 15:00:00	0	0	0	0	0	0	0	0	0	0	0	0	0
06/01/2004 16:00:00	0	0	0	0	0	0	0	0	0	0	0	0	0
06/01/2004 17:00:00	0	0	0	0	0	0	0	0	0	0	0	0	0
06/01/2004 18:00:00	0	0	0	0	0	0	0	0	0	0	0	0	0
06/01/2004 19:00:00	0	0	0	0	0	0	0	0	0	0	0	0	0
06/01/2004 20:00:00	0	0	0	0	0	0	0	0	0	0	0	0	0
06/01/2004 21:00:00	0	0	0	0	0	0	0	0	0	0	0	0	0
06/01/2004 22:00:00	0	0	0	0	0	0	0	0	0	0	0	0	0
06/01/2004 23:00:00	0	0	0	0	0	0	0	0	0	0	0	0	0
07/01/2004 00:00:00	0	0	0	0	0	0	0	0	0	0	0	0	0
07/01/2004 01:00:00	0	0	0	0	0	0	0	0	0	0	0	0	0
07/01/2004 02:00:00	0	0	0	0	0	0	0	0	0	0	0	0	0
07/01/2004 03:00:00	0	0	0	0	0	0	0	0	0	0	0	0	0
07/01/2004 04:00:00	0	0	0	0	0	0	0	0	0	0	0	0	0
07/01/2004 05:00:00	0	0	0	0	0	0	0	0	0	0	0	0	0
07/01/2004 06:00:00	0	0	0	0	0	0	0	0	0	0	0	0	0
07/01/2004 07:00:00	0	0	0	0	0	0	0	0	0	0	0	0	0
07/01/2004 08:00:00	0	0	0	0	0	0	0	0	0	0	0	0	0
07/01/2004 09:00:00	0	0	0	0	0	0	0	0	0	0	0	0	0
07/01/2004 10:00:00	0	0	0	0	0	0	0	0	0	0	0	0	0
07/01/2004 11:00:00	0	0	0	0	0	0	0	0	0	0	0	0	0
07/01/2004 12:00:00	0	0	0	0	0	0	0	0	0	0	0	0	0
07/01/2004 13:00:00	0	0	0	0	0	0	0	0	0	0	0	0	0
07/01/2004 14:00:00	0	0	0	0	0	0	0	0	0	0	0	0	0
07/01/2004 15:00:00	0	0	0	0	0	0	0	0	0	0	0	0	0
07/01/2004 16:00:00	0	0	0	0	0	0	0	0	0	0	0	0	0
07/01/2004 17:00:00	0	0	0	0	0	0	0	0	0	0	0	0	0
07/01/2004 18:00:00	0	0	0	0	0	0	0	0	0	0	0	0	0
07/01/2004 19:00:00	0	0	0	0	0	0	0	0	0	0	0	0	0
07/01/2004 20:00:00	0	0	0	0	0	0	0	0	0	0	0	0	0
07/01/2004 21:00:00	0	0	0	0	0	0	0	0	0	0	0	0	0
07/01/2004 22:00:00	0	0	0	0	0	0	0	0	0	0	0	0	0
07/01/2004 23:00:00	0	0	0	0	0	0	0	0	0	0	0	0	0
08/01/2004 00:00:00	0	0	0	0	0	0	0	0	0	0	0	0	0
08/01/2004 01:00:00	0	0	0	0	0	0	0	0	0	0	0	0	0
08/01/2004 02:00:00	0	0	0	0	0	0	0	0	0	0	0	0	0
08/01/2004 03:00:00	0	0	0	0	0	0	0	0	0	0	0	0	0
08/01/2004 04:00:00	0	0	0	0	0	0	0	0	0	0	0	0	0
08/01/2004 05:00:00	0	0	0	0	0	0	0	0	0	0	0	0	0
08/01/2004 06:00:00	0	0	0	0	0	0	0	0	0	0	0	0	0
08/01/2004 07:00:00	0	0	0	0	0	0	0	0	0	0	0	0	0
08/01/2004 08:00:00	0	0	0	0	0	0	0	0	0	0	0	0	0
08/01/2004 09:00:00	0	0	0	0	0	0	0	0	0	0	0	0	0
08/01/2004 10:00:00	0	0	0	0	0	0	0	0	0	0	0	0	0
08/01/2004 11:00:00	0	0	0	0	0	0	0	0	0	0	0	0	0
08/01/2004 12:00:00	0	0	0	0	0	0	0	0	0	0	0	0	0
08/01/2004 13:00:00	0	0	0	0	0	0	0	0	0	0	0	0	0
08/01/2004 14:00:00	0	0	0	0	0	0	0	0	0	0	0	0	0
08/01/2004 15:00:00	0	0	0	0	0	0	0	0	0	0	0	0	0
08/01/2004 16:00:00	0	0	0	0	0	0	0	0	0	0	0	0	0
08/01/2004 17:00:00	0	0	0	0	0	0	0	0	0	0	0	0	0
08/01/2004 18:00:00	0	0	0	0	0	0	0	0	0	0	0	0	0
08/01/2004 19:00:00	0	0	0	0	0	0	0	0	0	0	0	0	0
08/01/2004 20:00:00	0	0	0	0	0	0	0	0	0	0	0	0	0
08/01/2004 21:00:00	0	0	0	0	0	0	0	0	0	0	0	0	0
08/01/2004 22:00:00	0	0	0	0	0	0	0	0	0	0	0	0	0
08/01/2004 23:00:00	0	0	0	0	0	0	0	0	0	0	0	0	0
09/01/2004 00:00:00	0	0	0	0	0	0	0	0	0	0	0	0	0
09/01/2004 01:00:00	0	0	0	0	0	0	0	0	0	0	0	0	0
09/01/2004 02:00:00	0	0	0	0	0	0	0	0	0	0	0	0	0
09/01/2004 03:00:00	0	0	0	0	0	0	0	0	0	0	0	0	0
09/01/2004 04:00:00	0	0	0	0	0	0	0	0	0	0	0	0	0
09/01/2004 05:00:00	0	0	0	0	0	0	0	0	0	0	0	0	0
09/01/2004 06:00:00	0	0	0	0	0	0	0	0	0	0	0	0	0
09/01/2004 07:00:00	0	0	0	0	0	0	0	0	0	0	0	0	0
09/01/2004 08:00:00	0	0	0	0	0	0	0	0	0	0	0	0	0
09/01/2004 09:00:00	0	0	0	0	0	0	0	0	0	0	0	0	0
09/01/2004 10:00:00	0	0	0	0	0	0	0	0	0	0	0	0	0
09/01/2004 11:00:00	0	0	0	0	0	0	0	0	0	0	0	0	0
09/01/2004 12:00:00	0	0	0	0	0	0	0	0	0	0	0	0	0
09/01/2004 13:00:00	0	0	0	0	0	0	0	0	0	0	0	0	0
09/01/2004 14:00:00	0	0	0	0	0	0	0	0	0	0	0	0	0
09/01/2004 15:00:00	0	0	0	0	0	0	0	0	0	0	0	0	0
09/01/2004 16:00:00	0	0	0	0	0	0	0	0	0	0	0	0	0
09/01/2004 17:00:00	0	0	0	0	0	0	0	0	0	0	0	0	0
09/01/2004 18:00:00	0	0	0	0	0	0	0	0	0	0	0	0	0
09/01/2004 19:00:00	0	0	0	0	0	0	0	0	0	0	0	0	0
09/01/2004 20:00:00	0	0	0	0	0	0	0	0	0	0	0	0	0
09/01/2004 21:00:00	0	0	0	0	0	0	0	0	0	0	0	0	0
09/01/2004 22:00:00	0	0	0	0	0	0	0	0	0	0	0	0	0
09/01/2004 23:00:00	0	0	0	0	0	0	0	0	0	0	0	0	0
10/01/2004 00:00:00	0	0	0	0	0	0	0	0	0	0	0	0	0
10/01/2004 01:00:00	0	0	0	0	0	0	0	0	0	0	0	0	0
10/01/2004 02:00:00	0	0	0	0	0	0	0	0	0	0	0	0	0
10/01/2004 03:00:00	0	0	0	0	0	0	0	0	0	0	0	0	0
10/01/2004 04:00:00	0	0	0	0	0	0	0	0	0	0	0	0	0
10/01/2004 05:00:00	0	0	0	0	0	0	0	0	0	0	0	0	0
10/01/2004 06:00:00	0	0	0	0	0	0	0	0	0	0	0	0	0
10/01/2004 07:00:00	0	0	0	0	0	0	0	0	0	0	0	0	0
10/01/2004 08:00:00	0	0	0	0	0	0	0	0	0	0	0	0	0
10/01/2004 09:00:00	0	0	0	0	0	0	0	0	0	0	0	0	0
10/01/2004 10:00:00	0	0	0	0	0	0	0	0	0	0	0	0	0
10/01/2004 11:00:00	0	0	0	0	0	0	0	0	0	0	0	0	0
10/01/2004 12:00:00	0	0	0	0	0	0	0	0	0	0	0	0	0
10/01/2004 13:00:00	0	0	0	0	0	0	0	0	0	0	0	0	0
10/01/2004 14:00:00	0	0	0	0	0	0	0	0	0	0	0	0	0
10/01/2004 15:00:00	0	0	0	0	0	0	0	0	0	0	0	0	0
10/01/2004 16:00:00	0	0	0	0	0	0	0	0	0	0	0	0	0
10/01/2004 17:00:00	0	0	0	0	0	0	0	0	0	0	0	0	0
10/01/2004 18:00:00	0	0	0	0	0	0	0	0	0	0	0	0	0
10/01/2004 19:00:00	0	0	0	0	0	0	0	0	0	0	0	0	0
10/01/2004 20:00:00	0	0	0	0	0	0	0	0	0	0	0	0	0
10/01/2004 21:00:00	0	0	0	0	0	0	0	0	0	0	0	0	0
10/01/2004 22:00:00	0	0	0	0	0	0	0	0	0	0	0	0	0
10/01/2004 23:00:00	0	0	0	0	0	0	0	0	0	0	0	0	0
11/01/2004 00:00:00	0	0	0	0	0	0	0	0	0	0	0	0	0
11/01/2004 01:00:00	0	0	0	0	0	0	0	0	0	0	0	0	0
11/01/2004 02:00:00	0	0	0	0	0	0	0	0	0	0	0	0	0
11/01/2004 03:00:00	0	0	0	0	0	0	0	0	0	0	0	0	0
11/01/2004 04:00:00	0	0	0	0	0	0	0	0	0	0	0	0	0
11/01/2004 05:00:00	0	0	0	0	0	0	0	0	0	0	0	0	0
11/01/2004 06:00:00	0	0	0	0	0	0	0	0	0	0	0	0	0
11/01/2004 07:00:00	0	0	0	0	0	0	0	0	0	0	0	0	0
11/01/2004 08:00:00	0	0	0	0	0	0	0	0	0	0	0	0	0
11/01/2004 09:00:00	0	0	0	0	0	0	0	0	0	0	0	0	0
11/01/2004 10:00:00	0	0	0	0	0	0	0	0	0	0	0	0	0
11/01/2004 11:00:00	0	0	0	0	0	0	0	0	0	0	0	0	0
11/01/2004 12:00:00	0	0	0	0	0	0	0	0	0	0	0	0	0
11/01/2004 13:00:00	0	0	0	0	0	0	0	0	0	0	0	0	0
11/01/2004 14:00:00	0	0	0	0	0	0	0	0	0	0	0	0	0
11/01/2004 15:00:00	0	0	0	0	0	0	0	0	0	0	0	0	0
11/01/2004 16:00:00	0	0	0	0	0	0	0	0	0	0	0	0	0
11/01/2004 17:00:00	0	0	0	0	0	0	0	0	0	0	0	0	0
11/01/2004 18:00:00	0	0	0	0	0	0	0	0	0	0	0	0	0
11/01/2004 19:00:00	0	0	0	0	0	0	0	0	0	0	0	0	0
11/01/2004 20:00:00	0	0	0	0	0	0	0	0	0	0	0	0	0
11/01/2004 21:00:00	0	0	0	0	0	0	0	0	0	0	0	0	0
11/01/2004 22:00:00	0	0	0	0	0	0	0	0	0	0	0	0	0
11/01/2004 23:00:00	0	0	0	0	0	0	0	0	0	0	0	0	0
12/01/2004 00:00:00	0	0	0	0	0	0	0	0	0	0	0	0	0
12/01/2004 01:00:00	0	0	0	0	0	0	0	0	0	0	0	0	0
12/01/2004 02:00:00	0	0	0	0	0	0	0	0	0	0	0	0	0
12/01/2004 03:00:00	0	0	0	0	0	0	0	0	0	0	0	0	0
12/01/2004 04:00:00	0	0	0	0	0	0	0	0	0	0	0	0	0
12/01/2004 05:00:00	0	0	0	0	0	0	0	0	0	0	0	0	0
12/01/2004 06:00:00	0	0	0	0	0	0	0	0	0	0	0	0	0
12/01/2004 07:00:00	0	0	0	0	0	0	0	0	0	0	0	0	0
12/01/2004 08:00:00	0	0	0	0	0	0	0	0	0	0	0	0	0
12/01/2004 09:00:00	0	0	0	0	0	0	0	0	0	0	0	0	0
12/01/2004 10:00:00	0	0	0	0	0	0	0	0	0	0	0	0	0
12/01/2004 11:00:00	0	0	0	0	0	0	0	0	0	0	0	0	0
12/01/2004 12:00:00	0	0	0	0	0	0	0	0	0	0	0	0	0
12/01/2004 13:00:00	0	0	0	0	0	0	0	0	0	0	0	0	0
12/01/2004 14:00:00	0	0	0	0	0	0	0	0	0	0	0	0	0
12/01/2004 15:00:00	0	0	0	0	0	0	0	0	0	0	0	0	0
12/01/2004 16:00:00	0	0	0	0	0	0	0	0	0	0	0	0	0
12/01/2004 17:00:00	0	0	0	0	0	0	0	0	0	0	0	0	0
12/01/2004 18:00:00	0	0	0	0	0	0	0	0	0	0	0	0	0
12/01/2004 19:00:00	0	0	0	0	0	0	0	0	0	0	0	0	0
12/01/2004 20:00:00	0	0	0	0	0	0	0	0	0	0	0	0	0
12/01/2004 21:00:00	0	0	0	0	0	0	0	0	0	0	0	0	0
12/01/2004 22:00:00	0	0	0	0	0	0	0	0	0	0	0	0	0
12/01/2004 23:00:00	0	0	0	0	0	0	0	0	0	0	0	0	0
13/01/2004 00:00:00	0	0	0	0	0	0	0	0	0	0	0	0	0
13/01/2004 01:00:00	0	0	0	0	0	0	0	0	0	0	0	0	0
13/01/2004 02:00:00	0	0	0	0	0	0	0	0	0	0	0	0	0
13/01/2004 03:00:00	0	0	0	0	0	0	0	0	0	0	0	0	0
13/01/2004 04:00:00	0	0	0	0	0	0	0	0	0	0	0	0	0
13/01/2004 05:00:00	0	0	0	0	0	0	0	0	0	0	0	0	0
13/01/2004 06:00:00	0	0	0	0	0	0	0	0	0	0	0	0	0
13/01/2004 07:00:00	0	0	0	0	0	0	0	0	0	0	0	0	0
13/01/2004 08:00:00	0	0	0	0	0	0	0	0	0	0	0	0	0
13/01/2004 09:00:00	0	0	0	0	0	0	0	0	0	0	0	0	0
13/01/2004 10:00:00	0	0	0	0	0	0	0	0	0	0	0	0	0
13/01/2004 11:00:00	0	0	0	0	0	0	0	0	0	0	0	0	0
13/01/2004 12:00:00	0	0	0	0	0	0	0	0	0	0	0	0	0
13/01/2004 13:00:00	0	0	0	0	0	0	0	0	0	0	0	0	0
13/01/2004 14:00:00	0	0	0	0	0	0	0	0	0	0	0	0	0
13/01/2004 15:00:00	0	0	0	0	0	0	0	0	0	0	0	0	0
13/01/2004 16:00:00	0	0	0	0	0	0	0	0	0	0	0	0	0
13/01/2004 17:00:00	0	0	0	0	0	0	0	0	0	0	0	0	0
13/01/2004 18:00:00	0	0	0	0	0	0	0	0	0	0	0	0	0
13/01/2004 19:00:00	0	0	0	0	0	0	0	0	0	0	0	0	0
13/01/2004 20:00:00	0	0	0	0	0	0	0	0	0	0	0	0	0
13/01/2004 21:00:00	0	0	0	0	0	0	0	0	0	0	0	0	0
13/01/2004 22:00:00	0	0	0	0	0	0	0	0	0	0	0	0	0
13/01/2004 23:00:00	0	0	0	0	0	0	0	0	0	0	0	0	0
14/01/2004 00:00:00	0	0	0	0	0	0	0	0	0	0	0	0	0
14/01/2004 01:00:00	0	0	0	0	0	0	0	0	0	0	0	0	0
14/01/2004 02:00:00	0	0	0	0	0	0	0	0	0	0	0	0	0
14/01/2004 03:00:00	0	0	0	0	0	0	0	0	0	0	0	0	0
14/01/2004 04:00:00	0	0	0	0	0	0	0	0	0	0	0	0	0
14/01/2004 05:00:00	0	0	0	0	0	0	0	0	0	0	0	0	0
14/01/2004 06:00:00	0	0	0	0	0	0	0	0	0	0	0	0	0
14/01/2004 07:00:00	0	0	0	0	0	0	0	0	0	0	0	0	0
14/01/2004 08:00:00	0	0	0	0	0	0	0	0	0	0	0	0	0
14/01/2004 09:00:00	0	0	0	0	0	0	0	0	0	0	0	0	0
14/01/2004 10:00:00	0	0	0	0	0	0	0	0	0	0	0	0	0
14/01/2004 11:00:00	0	0	0	0	0	0	0	0	0	0	0	0	0
14/01/2004 12:00:00	0	0	0	0	0	0	0	0	0	0	0	0	0
14/01/2004 13:00:00	0	0	0	0	0	0	0	0	0	0	0	0	0
14/01/2004 14:00:00	0	0	0	0	0	0	0	0	0	0	0	0	0
14/01/2004 15:00:00	0	0	0	0	0	0	0	0	0	0	0	0	0
14/01/2004 16:00:00	0	0	0	0	0	0	0	0	0	0	0	0	0
14/01/2004 17:00:00	0	0	0	0	0	0	0	0	0	0	0	0	0
14/01/2004 18:00:00	0	0	0	0	0	0	0	0	0	0	0	0	0
14/01/2004 19:00:00	0	0	0	0	0	0	0	0	0	0	0	0	0
14/01/2004 20:00:00	0	0	0	0	0	0	0	0	0	0	0	0	0
14/01/2004 21:00:00	0	0	0	0	0	0	0	0	0	0	0	0	0
14/01/2004 22:00:00	0	0	0	0	0	0	0	0	0	0	0	0	0
14/01/2004 23:00:00	0	0	0	0	0	0	0	0	0	0	0	0	0
15/01/2004 00:00:00	0	0	0	0	0	0	0	0	0	0	0	0	0
15/01/2004 01:00:00	0	0	0	0	0	0	0	0	0	0	0	0	0
15/01/2004 02:00:00	0	0	0	0	0	0	0	0	0	0	0	0	0
15/01/2004 03:00:00	0	0	0	0	0	0	0	0	0	0	0	0	0
15/01/2004 04:00:00	0	0	0	0	0	0	0	0	0	0	0	0	0
15/01/2004 05:00:00	0	0	0	0	0	0	0	0	0	0	0	0	0
15/01/2004 06:00:00	0	0	0	0	0	0	0	0	0	0	0	0	0
15/01/2004 07:00:00	0	0	0	0	0	0	0	0	0	0	0	0	0
15/01/2004 08:00:00	0	0	0	0	0	0	0	0	0	0	0	0	0
15/01/2004 09:00:00	0	0	0	0	0	0	0	0	0	0	0	0	0
15/01/2004 10:00:00	0	0	0	0	0	0	0	0	0	0	0	0	0
15/01/2004 11:00:00	0	0	0	0	0	0	0	0	0	0	0	0	0
15/01/2004 12:00:00	0	0	0	0	0	0	0	0	0	0	0	0	0
15/01/2004 13:00:00	0	0	0	0	0	0	0	0	0	0	0	0	0
15/01/2004 14:00:00	0	0	0	0	0	0	0	0	0	0	0	0	0
15/01/2004 15:00:00	0	0	0	0	0	0	0	0	0	0	0	0	0
15/01/2004 16:00:00	0	0	0	0	0	0	0	0	0	0	0	0	0
15/01/2004 17:00:00	0	0	0	0	0	0	0	0	0	0	0	0	0
15/01/2004 18:00:00	0	0	0	0	0	0	0	0	0	0	0	0	0
15/01/2004 19:00:00	0	0	0	0	0	0	0	0	0	0	0	0	0
15/01/2004 20:00:00	0	0	0	0	0	0	0	0	0	0	0	0	0
15/01/2004 21:00:00	0	0	0	0	0	0	0	0	0	0	0	0	0
15/01/2004 22:00:00	0	0	0	0	0	0	0	0	0	0	0	0	0
15/01/2004 23:00:00	0	0	0	0	0	0	0	0	0	0	0	0	0
16/01/2004 00:00:00	0	0	0	0	0	0	0	0	0	0	0	0	0
16/01/2004 01:00:00	0	0	0	0	0	0	0	0	0	0	0	0	0
16/01/2004 02:00:00	0	0	0	0	0	0	0	0	0	0	0	0	0
16/01/2004 03:00:00	0	0	0	0	0	0	0	0	0	0	0	0	0
16/01/2004 04:00:00	0	0	0	0	0	0	0	0	0	0	0	0	0
16/01/2004 05:00:00	0	0	0	0	0	0	0	0	0	0	0	0	0
16/01/2004 06:00:00	0	0	0	0	0	0	0	0	0	0	0	0	0
16/01/2004 07:00:00	0	0	0	0	0	0	0	0	0	0	0	0	0
16/01/2004 08:00:00	0	0	0	0	0	0	0	0	0	0	0	0	0
16/01/2004 09:00:00	0	0	0	0	0	0	0	0	0	0	0	0	0
16/01/2004 10:00:00	0	0	0	0	0	0	0	0	0	0	0	0	0
16/01/2004 11:00:00	0	0	0	0	0	0	0	0	0	0	0	0	0
16/01/2004 12:00:00	0	0	0	0	0	0	0	0	0	0	0	0	0
16/01/2004 13:00:00	0	0	0	0	0	0	0	0	0	0	0	0	0
16/01/2004 14:00:00	0	0	0	0	0	0	0	0	0	0	0	0	0
16/01/2004 15:00:00	0	0	0	0	0	0	0	0	0	0	0	0	0
16/01/2004 16:00:00	0	0	0	0	0	0	0	0	0	0	0	0	0
16/01/2004 17:00:00	0	0	0	0	0	0	0	0	0	0	0	0	0
16/01/2004 18:00:00	0	0	0	0	0	0	0	0	0	0	0	0	0
16/01/2004 19:00:00	0	0	0	0	0	0	0	0	0	0	0	0	0
16/01/2004 20:00:00	0	0	0	0	0	0	0	0	0	0	0	0	0
16/01/2004 21:00:00	0	0	0	0	0	0	0	0	0	0	0	0	0
16/01/2004 22:00:00	0	0	0	0	0	0	0	0	0	0	0	0	0
16/01/2004 23:00:00	0	0	0	0	0	0	0	0	0	0	0	0	0
17/01/2004 00:00:00	0	0	0	0	0	0	0	0	0	0	0	0	0
17/01/2004 01:00:00	0	0	0	0	0	0	0	0	0	0	0	0	0
17/01/2004 02:00:00	0	0	0	0	0	0	0	0	0	0	0	0	0
17/01/2004 03:00:00	0	0	0	0	0	0	0	0	0	0	0	0	0
17/01/2004 04:00:00	0	0	0	0	0	0	0	0	0	0	0	0	0
17/01/2004 05:00:00	0	0	0	0	0	0	0	0	0	0	0	0	0
17/01/2004 06:00:00	0	0	0	0	0	0	0	0	0	0	0	0	0
17/01/2004 07:00:00	0	0	0	0	0	0	0	0	0	0	0	0	0
17/01/2004 08:00:00	0	0	0	0	0	0	0	0	0	0	0	0	0
17/01/2004 09:00:00	0	0	0	0	0	0	0	0	0	0	0	0	0
17/01/2004 10:00:00	0	0	0	0	0	0	0	0	0	0	0	0	0
17/01/2004 11:00:00	0	0	0	0	0	0	0	0	0	0	0	0	0
17/01/2004 12:00:00	0	0	0	0	0	0	0	0	0	0	0	0	0
17/01/2004 13:00:00	0	0	0	0	0	0	0	0	0	0	0	0	0
17/01/2004 14:00:00	0	0	0	0	0	0	0	0	0	0	0	0	0
17/01/2004 15:00:00	0	0	0	0	0	0	0	0	0	0	0	0	0
17/01/2004 16:00:00	0	0	0	0	0	0	0	0	0	0	0	0	0
17/01/2004 17:00:00	0	0	0	0	0	0	0	0	0	0	0	0	0
17/01/2004 18:00:00	0	0	0	0	0	0	0	0	0	0	0	0	0
17/01/2004 19:00:00	0	0	0	0	0	0	0	0	0	0	0	0	0
17/01/2004 20:00:00	0	0	0	0	0	0	0	0	0	0	0	0	0
17/01/2004 21:00:00	0	0	0	0	0	0	0	0	0	0	0	0	0
17/01/2004 22:00:00	0	0	0	0	0	0	0	0	0	0	0	0	0
17/01/2004 23:00:00	0	0	0	0	0	0	0	0	0	0	0	0	0
18/01/2004 00:00:00	0	0	0	0	0	0	0	0	0	0	0	0	0
18/01/2004 01:00:00	0	0	0	0	0	0	0	0	0	0	0	0	0
18/01/2004 02:00:00	0	0	0	0	0	0	0	0	0	0	0	0	0
18/01/2004 03:00:00	0	0	0	0	0	0	0	0	0	0	0	0	0
18/01/2004 04:00:00	0	0	0	0	0	0	0	0	0	0	0	0	0
18/01/2004 05:00:00	0	0	0	0	0	0	0	0	0	0	0	0	0
18/01/2004 06:00:00	0	0	0	0	0	0	0	0	0	0	0	0	0
18/01/2004 07:00:00	0	0	0	0	0	0	0	0	0	0	0	0	0
18/01/2004 08:00:00	0	0	0	0	0	0	0	0	0	0	0	0	0
18/01/2004 09:00:00	0	0	0	0	0	0	0	0	0	0	0	0	0
18/01/2004 10:00:00	0	0	0	0	0	0	0	0	0	0	0	0	0
18/01/2004 11:00:00	0	0	0	0	0	0	0	0	0	0	0	0	0
18/01/2004 12:00:00	0	0	0	0	0	0	0	0	0	0	0	0	0
18/01/2004 13:00:00	0	0	0	0	0	0	0	0	0	0	0	0	0
18/01/2004 14:00:00	0	0	0	0	0	0	0	0	0	0	0	0	0
18/01/2004 15:00:00	0	0	0	0	0	0	0	0	0	0	0	0	0
18/01/2004 16:00:00	0	0	0	0	0	0	0	0	0	0	0	0	0
18/01/2004 17:00:00	0	0	0	0	0	0	0	0	0	0	0	0	0
18/01/2004 18:00:00	0	0	0	0	0	0	0	0	0	0	0	0	0
18/01/2004 19:00:00	0	0	0	0	0	0	0	0	0	0	0	0	0
18/01/2004 20:00:00	0	0	0	0	0	0	0	0	0	0	0	0	0
18/01/2004 21:00:00	0	0	0	0	0	0	0	0	0	0	0	0	0
18/01/2004 22:00:00	0	0	0	0	0	0	0	0	0	0	0	0	0
18/01/2004 23:00:00	0	0	0	0	0	0	0	0	0	0	0	0	0
19/01/2004 00:00:00	0	0	0	0	0	0	0	0	0	0	0	0	0
19/01/2004 01:00:00	0	0	0	0	0	0	0	0	0	0	0	0	0
19/01/2004 02:00:00	0	0	0	0	0	0	0	0	0	0	0	0	0
19/01/2004 03:00:00	0	0	0	0	0	0	0	0	0	0	0	0	0
19/01/2004 04:00:00	0	0	0	0	0	0	0	0	0	0	0	0	0
19/01/2004 05:00:00	0	0	0	0	0	0	0	0	0	0	0	0	0
19/01/2004 06:00:00	0	0	0	0	0	0	0	0	0	0	0	0	0
19/01/2004 07:00:00	0	0	0	0	0	0	0	0	0	0	0	0	0
19/01/2004 08:00:00	0	0	0	0	0	0	0	0	0	0	0	0	0
19/01/2004 09:00:00	0	0	0	0	0	0	0	0	0	0	0	0	0
19/01/2004 10:00:00	0	0	0	0	0	0	0	0	0	0	0	0	0
19/01/2004 11:00:00	0	0	0	0	0	0	0	0	0	0	0	0	0
19/01/2004 12:00:00	0	0	0	0	0	0	0	0	0	0	0	0	0
19/01/2004 13:00:00	0	0	0	0	0	0	0	0	0	0	0	0	0
19/01/2004 14:00:00	0	0	0	0	0	0	0	0	0	0	0	0	0
19/01/2004 15:00:00	0	0	0	0	0	0	0	0	0	0	0	0	0
19/01/2004 16:00:00	0	0	0	0	0	0	0	0	0	0	0	0	0
19/01/2004 17:00:00	0	0	0	0	0	0	0	0	0	0	0	0	0
19/01/2004 18:00:00	0	0	0	0	0	0	0	0	0	0	0	0	0
19/01/2004 19:00:00	0	0	0	0	0	0	0	0	0	0	0	0	0
19/01/2004 20:00:00	0	0	0	0	0	0	0	0	0	0	0	0	0
19/01/2004 21:00:00	0	0	0	0	0	0	0	0	0	0	0	0	0
19/01/2004 22:00:00	0	0	0	0	0	0	0	0	0	0	0	0	0
19/01/2004 23:00:00	0	0	0	0	0	0	0	0	0	0	0	0	0
20/01/2004 00:00:00	0	0	0	0	0	0	0	0	0	0	0	0	0
20/01/2004 01:00:00	0	0	0	0	0	0	0	0	0	0	0	0	0
20/01/2004 02:00:00	0	0	0	0	0	0	0	0	0	0	0	0	0
20/01/2004 03:00:00	0	0	0	0	0	0	0	0	0	0	0	0	0
20/01/2004 04:00:00	0	0	0	0	0	0	0	0	0	0	0	0	0
20/01/2004 05:00:00	0	0	0	0	0	0	0	0	0	0	0	0	0
20/01/2004 06:00:00	0	0	0	0	0	0	0	0	0	0	0	0	0
20/01/2004 07:00:00	0	0	0	0	0	0	0	0	0	0	0	0	0
20/01/2004 08:00:00	0	0	0	0	0	0	0	0	0	0	0	0	0
20/01/2004 09:00:00	0	0	0	0	0	0	0	0	0	0	0	0	0
20/01/2004 10:00:00	0	0	0	0	0	0	0	0	0	0	0	0	0
20/01/2004 11:00:00	0	0	0	0	0	0	0	0	0	0	0	0	0
20/01/2004 12:00:00	0	0	0	0	0	0	0	0	0	0	0	0	0
20/01/2004 13:00:00	0	0	0	0	0	0	0	0	0	0	0	0	0
20/01/2004 14:00:00	0	0	0	0	0	0	0	0	0	0	0	0	0
20/01/2004 15:00:00	0	0	0	0	0	0	0	0	0	0	0	0	0
20/01/2004 16:00:00	0	0	0	0	0	0	0	0	0	0	0	0	0
20/01/2004 17:00:00	0	0	0	0	0	0	0	0	0	0	0	0	0
20/01/2004 18:00:00	0	0	0	0	0	0	0	0	0	0	0	0	0
20/01/2004 19:00:00	0	0	0	0	0	0	0	0	0	0	0	0	0
20/01/2004 20:00:00	0	0	0	0	0	0	0	0	0	0	0	0	0
20/01/2004 21:00:00	0	0	0	0	0	0	0	0	0	0	0	0	0
20/01/2004 22:00:00	0	0	0	0	0	0	0	0	0	0	0	0	0
20/01/2004 23:00:00	0	0	0	0	0	0	0	0	0	0	0	0	0
21/01/2004 00:00:00	0	0	0	0	0	0	0	0	0	0	0	0	0
21/01/2004 01:00:00	0	0	0	0	0	0	0	0	0	0	0	0	0
21/01/2004 02:00:00	0	0	0	0	0	0	0	0	0	0	0	0	0
21/01/2004 03:00:00	0	0	0	0	0	0	0	0	0	0	0	0	0
21/01/2004 04:00:00	0	0	0	0	0	0	0	0	0	0	0	0	0
21/01/2004 05:00:00	0	0	0	0	0	0	0	0	0	0	0	0	0
21/01/2004 06:00:00	0	0	0	0	0	0	0	0	0	0	0	0	0
21/01/2004 07:00:00	0	0	0	0	0	0	0	0	0	0	0	0	0
21/01/2004 08:00:00	0	0	0	0	0	0	0	0	0	0	0	0	0
21/01/2004 09:00:00	0	0	0	0	0	0	0	0	0	0	0	0	0
21/01/2004 10:00:00	0	0	0	0	0	0	0	0	0	0	0	0	0
21/01/2004 11:00:00	0	0	0	0	0	0	0	0	0	0	0	0	0
21/01/2004 12:00:00	0	0	0	0	0	0	0	0	0	0	0	0	0
21/01/2004 13:00:00	0	0	0	0	0	0	0	0	0	0	0	0	0
21/01/2004 14:00:00	0	0	0	0	0	0	0	0	0	0	0	0	0
21/01/2004 15:00:00	0	0	0	0	0	0	0	0	0	0	0	0	0
21/01/2004 16:00:00	0	0	0	0	0	0	0	0	0	0	0	0	0
21/01/2004 17:00:00	0	0	0	0	0	0	0	0	0	0	0	0	0
21/01/2004 18:00:00	0	0	0	0	0	0	0	0	0	0	0	0	0
21/01/2004 19:00:00	0	0	0	0	0	0	0	0	0	0	0	0	0
21/01/2004 20:00:00	0	0	0	0	0	0	0	0	0	0	0	0	0
21/01/2004 21:00:00	0	0	0	0	0	0	0	0	0	0	0	0	0
21/01/2004 22:00:00	0	0	0	0	0	0	0	0	0	0	0	0	0
21/01/2004 23:00:00	0	0	0	0	0	0	0	0	0	0	0	0	0
22/01/2004 00:00:00	0	0	0	0	0	0	0	0	0	0	0	0	0
22/01/2004 01:00:00	0	0	0	0	0	0	0	0	0	0	0	0	0
22/01/2004 02:00:00	0	0	0	0	0	0	0	0	0	0	0	0	0
22/01/2004 03:00:00	0	0	0	0	0	0	0	0	0	0	0	0	0
22/01/2004 04:00:00	0	0	0	0	0	0	0	0	0	0	0	0	0
22/01/2004 05:00:00	0	0	0	0	0	0	0	0	0	0	0	0	0
22/01/2004 06:00:00	0	0	0	0	0	0	0	0	0	0	0	0	0
22/01/2004 07:00:00	0	0	0	0	0	0	0	0	0	0	0	0	0
22/01/2004 08:00:00	0	0	0	0	0	0	0	0	0	0	0	0	0
22/01/2004 09:00:00	0	0	0	0	0	0	0	0	0	0	0	0	0
22/01/2004 10:00:00	0	0	0	0	0	0	0	0	0	0	0	0	0
22/01/2004 11:00:00	0	0	0	0	0	0	0	0	0	0	0	0	0
22/01/2004 12:00:00	0	0	0	0	0	0	0	0	0	0	0	0	0
22/01/2004 13:00:00	0	0	0	0	0	0	0	0	0	0	0	0	0
22/01/2004 14:00:00	0	0	0	0	0	0	0	0	0	0	0	0	0
22/01/2004 15:00:00	0	0	0	0	0	0	0	0	0	0	0	0	0
22/01/2004 16:00:00	0	0	0	0	0	0	0	0	0	0	0	0	0
22/01/2004 17:00:00	0	0	0	0	0	0	0	0	0	0	0	0	0
22/01/2004 18:00:00	0	0	0	0	0	0	0	0	0	0	0	0	0
22/01/2004 19:00:00	0	0	0	0	0	0	0	0	0	0	0	0	0
22/01/2004 20:00:00	0	0	0	0	0	0	0	0	0	0	0	0	0
22/01/2004 21:00:00	0	0	0	0	0	0	0	0	0	0	0	0	0
22/01/2004 22:00:00	0	0	0	0	0	0	0	0	0	0	0	0	0
22/01/2004 23:00:00	0	0	0	0	0	0	0	0	0	0	0	0	0
23/01/2004 00:00:00	0	0	0	0	0	0	0	0	0	0	0	0	0
23/01/2004 01:00:00	0	0	0	0	0	0	0	0	0	0	0	0	0
23/01/2004 02:00:00	0	0	0	0	0	0	0	0	0	0	0	0	0
23/01/2004 03:00:00	0	0	0	0	0	0	0	0	0	0	0	0	0
23/01/2004 04:00:00	0	0	0	0	0	0	0	0	0	0	0	0	0
23/01/2004 05:00:00	0	0	0	0	0	0	0	0	0	0	0	0	0
23/01/2004 06:00:00	0	0	0	0	0	0	0	0	0	0	0	0	0
23/01/2004 07:00:00	0	0	0	0	0	0	0	0	0	0	0	0	0
23/01/2004 08:00:00	0	0	0	0	0	0	0	0	0	0	0	0	0
23/01/2004 09:00:00	0	0	0	0	0	0	0	0	0	0	0	0	0
23/01/2004 10:00:00	0	0	0	0	0	0	0	0	0	0	0	0	0
23/01/2004 11:00:00	0	0	0	0	0	0	0	0	0	0	0	0	0
23/01/2004 12:00:00	0	0	0	0	0	0	0	0	0	0	0	0	0
23/01/2004 13:00:00	0	0	0	0	0	0	0	0	0	0	0	0	0
23/01/2004 14:00:00	0	0	0	0	0	0	0	0	0	0	0	0	0
23/01/2004 15:00:00	0	0	0	0	0	0	0	0	0	0	0	0	0
23/01/2004 16:00:00	0	0	0	0	0	0	0	0	0	0	0	0	0
23/01/2004 17:00:00	0	0	0	0	0	0	0	0	0	0	0	0	0
23/01/2004 18:00:00	0	0	0	0	0	0	0	0	0	0	0	0	0
23/01/2004 19:00:00	0	0	0	0	0	0	0	0	0	0	0	0	0
23/01/2004 20:00:00	0	0	0	0	0	0	0	0	0	0	0	0	0
23/01/2004 21:00:00	0	0	0	0	0	0	0	0	0	0	0	0	0
23/01/2004 22:00:00	0	0	0	0	0	0	0	0	0	0	0	0	0
23/01/2004 23:00:00	0	0	0	0	0	0	0	0	0	0	0	0	0
24/01/2004 00:00:00	0	0	0	0	0	0	0	0	0	0	0	0	0
24/01/2004 01:00:00	0	0	0	0	0	0	0	0	0	0	0	0	0
24/01/2004 02:00:00	0	0	0	0	0	0	0	0	0	0	0	0	0
24/01/2004 03:00:00	0	0	0	0	0	0	0	0	0	0	0	0	0
24/01/2004 04:00:00	0	0	0	0	0	0	0	0	0	0	0	0	0
24/01/2004 05:00:00	0	0	0	0	0	0	0	0	0	0	0	0	0
24/01/2004 06:00:00	0	0	0	0	0	0	0	0	0	0	0	0	0
24/01/2004 07:00:00	0	0	0	0	0	0	0	0	0	0	0	0	0
24/01/2004 08:00:00	0	0	0	0	0	0	0	0	0	0	0	0	0
24/01/2004 09:00:00	0	0	0	0	0	0	0	0	0	0	0	0	0
24/01/2004 10:00:00	0	0	0	0	0	0	0	0	0	0	0	0	0
24/01/2004 11:00:00	0	0	0	0	0	0	0	0	0	0	0	0	0
24/01/2004 12:00:00	0	0	0	0	0	0	0	0	0	0	0	0	0
24/01/2004 13:00:00	0	0	0	0	0	0	0	0	0	0	0	0	0
24/01/2004 14:00:00	0	0	0	0	0	0	0	0	0	0	0	0	0
24/01/2004 15:00:00	0	0	0	0	0	0	0	0	0	0	0	0	0
24/01/2004 16:00:00	0	0	0	0	0	0	0	0	0	0	0	0	0
24/01/2004 17:00:00	0	0	0	0	0	0	0	0	0	0	0	0	0
24/01/2004 18:00:00	0	0	0	0	0	0	0	0	0	0	0	0	0
24/01/2004 19:00:00	0	0	0	0	0	0	0	0	0	0	0	0	0
24/01/2004 20:00:00	0	0	0	0	0	0	0	0	0	0	0	0	0
24/01/2004 21:00:00	0	0	0	0	0	0	0	0	0	0	0	0	0
24/01/2004 22:00:00	0	0	0	0	0	0	0	0	0	0	0	0	0
24/01/2004 23:00:00	0	0	0	0	0	0	0	0	0	0	0	0	0
25/01/2004 00:00:00	0	0	0	0	0	0	0	0	0	0	0	0	0
25/01/2004 01:00:00	0	0	0	0	0	0	0	0	0	0	0	0	0
25/01/2004 02:00:00	0	0	0	0	0	0	0	0	0	0	0	0	0
25/01/2004 03:00:00	0	0	0	0	0	0	0	0	0	0	0	0	0
25/01/2004 04:00:00	0	0	0	0	0	0	0	0	0	0	0	0	0
25/01/2004 05:00:00	0	0	0	0	0	0	0	0	0	0	0	0	0
25/01/2004 06:00:00	0	0	0	0	0	0	0	0	0	0	0	0	0
25/01/2004 07:00:00	0	0	0	0	0	0	0	0	0	0	0	0	0
25/01/2004 08:00:00	0	0	0	0	0	0	0	0	0	0	0	0	0
25/01/2004 09:00:00	0	0	0	0	0	0	0	0	0	0	0	0	0
25/01/2004 10:00:00	0	0	0	0	0	0	0	0	0	0	0	0	0
25/01/2004 11:00:00	0	0	0	0	0	0	0	0	0	0	0	0	0
25/01/2004 12:00:00	0	0	0	0	0	0	0	0	0	0	0	0	0
25/01/2004 13:00:00	0	0	0	0	0	0	0	0	0	0	0	0	0
25/01/2004 14:00:00	0	0	0	0	0	0	0	0	0	0	0	0	0
25/01/2004 15:00:00	0	0	0	0	0	0	0	0	0	0	0	0	0
25/01/2004 16:00:00	0	0	0	0	0	0	0	0	0	0	0	0	0
25/01/2004 17:00:00	0	0	0	0	0	0	0	0	0	0	0	0	0
25/01/2004 18:00:00	0	0	0	0	0	0	0	0	0	0	0	0	0
25/01/2004 19:00:00	0	0	0	0	0	0	0	0	0	0	0	0	0
25/01/2004 20:00:00	0	0	0	0	0	0	0	0	0	0	0	0	0
25/01/2004 21:00:00	0	0	0	0	0	0	0	0	0	0	0	0	0
25/01/2004 22:00:00	0	0	0	0	0	0	0	0	0	0	0	0	0
25/01/2004 23:00:00	0	0	0	0	0	0	0	0	0	0	0	0	0
26/01/2004 00:00:00	0	0	0	0	0	0	0	0	0	0	0	0	0
26/01/2004 01:00:00	0	0	0	0	0	0	0	0	0	0	0	0	0
26/01/2004 02:00:00	0	0	0	0	0	0	0	0	0	0	0	0	0
26/01/2004 03:00:00	0	0	0	0	0	0	0	0	0	0	0	0	0
26/01/2004 04:00:00	0	0	0	0	0	0	0	0	0	0	0	0	0
26/01/2004 05:00:00	0	0	0	0	0	0	0	0	0	0	0	0	0
26/01/2004 06:00:00	0	0	0	0	0	0	0	0	0	0	0	0	0
26/01/2004 07:00:00	0	0	0	0	0	0	0	0	0	0	0	0	0
26/01/2004 08:00:00	0	0	0	0	0	0	0	0	0	0	0	0	0
26/01/2004 09:00:00	0	0	0	0	0	0	0	0	0	0	0	0	0
26/01/2004 10:00:00	0	0	0	0	0	0	0	0	0	0	0	0	0
26/01/2004 11:00:00	0	0	0	0	0	0	0	0	0	0	0	0	0
26/01/2004 12:00:00	0	0	0	0	0	0	0	0	0	0	0	0	0
26/01/2004 13:00:00	0	0	0	0	0	0	0	0	0	0	0	0	0
26/01/2004 14:00:00	0	0	0	0	0	0	0	0	0	0	0	0	0
26/01/2004 15:00:00	0	0	0	0	0	0	0	0	0	0	0	0	0
26/01/2004 16:00:00	0	0	0	0	0	0	0	0	0	0	0	0	0
26/01/2004 17:00:00	0	0	0	0	0	0	0	0	0	0	0	0	0
26/01/2004 18:00:00	0	0	0	0	0	0	0	0	0	0	0	0	0
26/01/2004 19:00:00	0	0	0	0	0	0	0	0	0	0	0	0	0
26/01/2004 20:00:00	0	0	0	0	0	0	0	0	0	0	0	0	0
26/01/2004 21:00:00	0	0	0	0	0	0	0	0	0	0	0	0	0
26/01/2004 22:00:00	0	0	0	0	0	0	0	0	0	0	0	0	0
26/01/2004 23:00:00	0	0	0	0	0	0	0	0	0	0	0	0	0
27/01/2004 00:00:00	0	0	0	0	0	0	0	0	0	0	0	0	0
27/01/2004 01:00:00	0	0	0	0	0	0	0	0	0	0	0	0	0
27/01/2004 02:00:00	0	0	0	0	0	0	0	0	0	0	0	0	0
27/01/2004 03:00:00	0	0	0	0	0	0	0	0	0	0	0	0	0
27/01/2004 04:00:00	0	0	0	0	0	0	0	0	0	0	0	0	0
27/01/2004 05:00:00	0	0	0	0	0	0	0	0	0	0	0	0	0
27/01/2004 06:00:00	0	0	0	0	0	0	0	0	0	0	0	0	0
27/01/2004 07:00:00	0	0	0	0	0	0	0	0	0	0	0	0	0
27/01/2004 08:00:00	0	0	0	0	0	0	0	0	0	0	0	0	0
27/01/2004 09:00:00	0	0	0	0	0	0	0	0	0	0	0	0	0
27/01/2004 10:00:00	0	0	0	0	0	0	0	0	0	0	0	0	0
27/01/2004 11:00:00	0	0	0	0	0	0	0	0	0	0	0	0	0
27/01/2004 12:00:00	0	0	0	0	0	0	0	0	0	0	0	0	0
27/01/2004 13:00:00	0	0	0	0	0	0	0	0	0	0	0	0	0
27/01/2004 14:00:00	0	0	0	0	0	0	0	0	0	0	0	0	0
27/01/2004 15:00:00	0	0	0	0	0	0	0	0	0	0	0	0	0
27/01/2004 16:00:00	0	0	0	0	0	0	0	0	0	0	0	0	0
27/01/2004 17:00:00	0	0	0	0	0	0	0	0	0	0	0	0	0
27/01/2004 18:00:00	0	0	0	0	0	0	0	0	0	0	0	0	0
27/01/2004 19:00:00	0	0	0	0	0	0	0	0	0	0	0	0	0
27/01/2004 20:00:00	0	0	0	0	0	0	0	0	0	0	0	0	0
27/01/2004 21:00:00	0	0	0	0	0	0	0	0	0	0	0	0	0
27/01/2004 22:00:00	0	0	0	0	0	0	0	0	0	0	0	0	0
27/01/2004 23:00:00	0	0	0	0	0	0	0	0	0	0	0	0	0
28/01/2004 00:00:00	0	0	0	0	0	0	0	0	0	0	0	0	0
28/01/2004 01:00:00	0	0	0	0	0	0	0	0	0	0	0	0	0
28/01/2004 02:00:00	0	0	0	0	0	0	0	0	0	0	0	0	0
28/01/2004 03:00:00	0	0	0	0	0	0	0	0	0	0	0	0	0
28/01/2004 04:00:00	0	0	0	0	0	0	0	0	0	0	0	0	0
28/01/2004 05:00:00	0	0	0	0	0	0	0	0	0	0	0	0	0
28/01/2004 06:00:00	0	0	0	0	0	0	0	0	0	0	0	0	0
28/01/2004 07:00:00	0	0	0	0	0	0	0	0	0	0	0	0	0
28/01/2004 08:00:00	0	0	0	0	0	0	0	0	0	0	0	0	0
28/01/2004 09:00:00	0	0	0	0	0	0	0	0	0	0	0	0	0
28/01/2004 10:00:00	0	0	0	0	0	0	0	0	0	0	0	0	0
28/01/2004 11:00:00	0	0	0	0	0	0	0	0	0	0	0	0	0
28/01/2004 12:00:00	0	0	0	0	0	0	0	0	0	0	0	0	0
28/01/2004 13:00:00	0	0	0	0	0	0	0	0	0	0	0	0	0
28/01/2004 14:00:00	0	0	0	0	0	0	0	0	0	0	0	0	0
28/01/2004 15:00:00	0	0	0	0	0	0	0	0	0	0	0	0	0
28/01/2004 16:00:00	0	0	0	0	0	0	0	0	0	0	0	0	0
28/01/2004 17:00:00	0	0	0	0	0	0	0	0	0	0	0	0	0
28/01/2004 18:00:00	0	0	0	0	0	0	0	0	0	0	0	0	0
28/01/2004 19:00:00	0	0	0	0	0	0	0	0	0	0	0	0	0
28/01/2004 20:00:00	0	0	0	0	0	0	0	0	0	0	0	0	0
28/01/2004 21:00:00	0	0	0	0	0	0	0	0	0	0	0	0	0
28/01/2004 22:00:00	0	0	0	0	0	0	0	0	0	0	0	0	0
28/01/2004 23:00:00	0	0	0	0	0	0	0	0	0	0	0	0	0
29/01/2004 00:00:00	0	0	0	0	0	0	0	0	0	0	0	0	0
29/01/2004 01:00:00	0	0	0	0	0	0	0	0	0	0	0	0	0
29/01/2004 02:00:00	0	0	0	0	0	0	0	0	0	0	0	0	0
29/01/2004 03:00:00	0	0	0	0	0	0	0	0	0	0	0	0	0
29/01/2004 04:00:00	0	0	0	0	0	0	0	0	0	0	0	0	0
29/01/2004 05:00:00	0	0	0	0	0	0	0	0	0	0	0	0	0
29/01/2004 06:00:00	0	0	0	0	0	0	0	0	0	0	0	0	0
29/01/2004 07:00:00	0	0	0	0	0	0	0	0	0	0	0	0	0
29/01/2004 08:00:00	0	0	0	0	0	0	0	0	0	0	0	0	0
29/01/2004 09:00:00	0	0	0	0	0	0	0	0	0	0	0	0	0
29/01/2004 10:00:00	0	0	0	0	0	0	0	0	0	0	0	0	0
29/01/2004 11:00:00	0	0	0	0	0	0	0	0	0	0	0	0	0
29/01/2004 12:00:00	0	0	0	0	0	0	0	0	0	0	0	0	0
29/01/2004 13:00:00	0	0	0	0	0	0	0	0	0	0	0	0	0
29/01/2004 14:00:00	0	0	0	0	0	0	0	0	0	0	0	0	0
29/01/2004 15:00:00	0	0	0	0	0	0	0	0	0	0	0	0	0
29/01/2004 16:00:00	0	0	0	0	0	0	0	0	0	0	0	0	0
29/01/2004 17:00:00	0	0	0	0	0	0	0	0	0	0	0	0	0
29/01/2004 18:00:00	0	0	0	0	0	0	0	0	0	0	0	0	0
29/01/2004 19:00:00	0	0	0	0	0	0	0	0	0	0	0	0	0
29/01/2004 20:00:00	0	0	0	0	0	0	0	0	0	0	0	0	0
29/01/2004 21:00:00	0	0	0	0	0	0	0	0	0	0	0	0	0
29/01/2004 22:00:00	0	0	0	0	0	0	0	0	0	0	0	0	0
29/01/2004 23:00:00	0	0	0	0	0	0	0	0	0	0	0	0	0
30/01/2004 00:00:00	0	0	0	0	0	0	0	0	0	0	0	0	0
30/01/2004 01:00:00	0	0	0	0	0	0	0	0	0	0	0	0	0
30/01/2004 02:00:00	0	0	0	0	0	0	0	0	0	0	0	0	0
30/01/2004 03:00:00	0	0	0	0	0	0	0	0	0	0	0	0	0
30/01/2004 04:00:00	0	0	0	0	0	0	0	0	0	0	0	0	0
30/01/2004 05:00:00	0	0	0	0	0	0	0	0	0	0	0	0	0
30/01/2004 06:00:00	0	0	0	0	0	0	0	0	0	0	0	0	0
30/01/2004 07:00:00	0	0	0	0	0	0	0	0	0	0	0	0	0
30/01/2004 08:00:00	0	0	0	0	0	0	0	0	0	0	0	0	0
30/01/2004 09:00:00	0	0	0	0	0	0	0	0	0	0	0	0	0
30/01/2004 10:00:00	0	0	0	0	0	0	0	0	0	0	0	0	0
30/01/2004 11:00:00	0	0	0	0	0	0	0	0	0	0	0	0	0
30/01/2004 12:00:00	0	0	0	0	0	0	0	0	0	0	0	0	0
30/01/2004 13:00:00	0	0	0	0	0	0	0	0	0	0	0	0	0
30/01/2004 14:00:00	0	0	0	0	0	0	0	0	0	0	0	0	0
30/01/2004 15:00:00	0	0	0	0	0	0	0	0	0	0	0	0	0
30/01/2004 16:00:00	0	0	0	0	0	0	0	0	0	0	0	0	0
30/01/2004 17:00:00	0	0	0	0	0	0	0	0	0	0	0	0	0
30/01/2004 18:00:00	0	0	0	0	0	0	0	0	0	0	0	0	0
30/01/2004 19:00:00	0	0	0	0	0	0	0	0	0	0	0	0	0
30/01/2004 20:00:00	0	0	0	0	0	0	0	0	0	0	0	0	0
30/01/2004 21:00:00	0	0	0	0	0	0	0	0	0	0	0	0	0
30/01/2004 22:00:00	0	0	0	0	0	0	0	0	0	0	0	0	0
30/01/2004 23:00:00	0	0	0	0	0	0	0	0	0	0	0	0	0
31/01/2004 00:00:00	0	0	0	0	0	0	0	0	0	0	0	0	0
31/01/2004 01:00:00	0	0	0	0	0	0	0	0	0	0	0	0	0
31/01/2004 02:00:00	0	0	0	0	0	0	0	0	0	0	0	0	0
31/01/2004 03:00:00	0	0	0	0	0	0	0	0	0	0	0	0	0
31/01/2004 04:00:00	0	0	0	0	0	0	0	0	0	0	0	0	0
31/01/2004 05:00:00	0	0	0	0	0	0	0	0	0	0	0	0	0
31/01/2004 06:00:00	0	0	0	0	0	0	0	0	0	0	0	0	0
31/01/2004 07:00:00	0	0	0	0	0	0	0	0	0	0	0	0	0
31/01/2004 08:00:00	0	0	0	0	0	0	0	0	0	0	0	0	0
31/01/2004 09:00:00	0	0	0	0	0	0	0	0	0	0	0	0	0
31/01/2004 10:00:00	0	0	0	0	0	0	0	0	0	0	0	0	0
31/01/2004 11:00:00	0	0	0	0	0	0	0	0	0	0	0	0	0
31/01/2004 12:00:00	0	0	0	0	0	0	0	0	0	0	0	0	0
31/01/2004 13:00:00	0	0	0	0	0	0	0	0	0	0	0	0	0
31/01/2004 14:00:00	0	0	0	0	0	0	0	0	0	0	0	0	0
31/01/2004 15:00:00	0	0	0	0	0	0	0	0	0	0	0	0	0
31/01/2004 16:00:00	0	0	0	0	0	0	0	0	0	0	0	0	0
31/01/2004 17:00:00	0	0	0	0	0	0	0	0	0	0	0	0	0
31/01/2004 18:00:00	0	0	0	0	0	0	0	0	0	0	0	0	0
31/01/2004 19:00:00	0	0	0	0	0	0	0	0	0	0	0	0	0
31/01/2004 20:00:00	0	0	0	0	0	0	0	0	0	0	0	0	0
31/01/2004 21:00:00	0	0	0	0	0	0	0	0	0	0	0	0	0
31/01/2004 22:00:00	0	0	0	0	0	0	0	0	0	0	0	0	0
31/01/2004 23:00:00	0	0	0	0	0	0	0	0	0	0	0	0	0
01/02/2004 00:00:00	0	0	0	0	0	0	0	0	0	0	0	0	0
01/02/2004 01:00:00	0	0	0	0	0	0	0	0	0	0	0	0	0
01/02/2004 02:00:00	0	0	0	0	0	0	0	0	0	0	0	0	0
01/02/2004 03:00:00	0	0	0	0	0	0	0	0	0	0	0	0	0
01/02/2004 04:00:00	0	0	0	0	0	0	0	0	0	0	0	0	0
01/02/2004 05:00:00	0	0	0	0	0	0	0	0	0	0	0	0	0
01/02/2004 06:00:00	0	0	0	0	0	0	0	0	0	0	0	0	0
01/02/2004 07:00:00	0	0	0	0	0	0	0	0	0	0	0	0	0
01/02/2004 08:00:00	0	0	0	0	0	0	0	0	0	0	0	0	0
01/02/2004 09:00:00	0	0	0	0	0	0	0	0	0	0	0	0	0
01/02/2004 10:00:00	0	0	0	0	0	0	0	0	0	0	0	0	0
01/02/2004 11:00:00	0	0	0	0	0	0	0	0	0	0	0	0	0
01/02/2004 12:00:00	0	0	0	0	0	0	0	0	0	0	0	0	0
01/02/2004 13:00:00	0	0	0	0	0	0	0	0	0	0	0	0	0
01/02/2004 14:00:00	0	0	0	0	0	0	0	0	0	0	0	0	0
01/02/2004 15:00:00	0	0	0	0	0	0	0	0	0	0	0	0	0
01/02/2004 16:00:00	0	0	0	0	0	0	0	0	0	0	0	0	0
01/02/2004 17:00:00	0	0	0	0	0	0	0	0	0	0	0	0	0
01/02/2004 18:00:00	0	0	0	0	0	0	0	0	0	0	0	0	0
01/02/2004 19:00:00	0	0	0	0	0	0	0	0	0	0	0	0	0
01/02/2004 20:00:00	0	0	0	0	0	0	0	0	0	0	0	0	0
01/02/2004 21:00:00	0	0	0	0	0	0	0	0	0	0	0	0	0
01/02/2004 22:00:00	0	0	0	0	0	0	0	0	0	0	0	0	0
01/02/2004 23:00:00	0	0	0	0	0	0	0	0	0	0	0	0	0
02/02/2004 00:00:00	0	0	0	0	0	0	0	0	0	0	0	0	0
02/02/2004 01:00:00	0	0	0	0	0	0	0	0	0	0	0	0	0
02/02/2004 02:00:00	0	0	0	0	0	0	0	0	0	0	0	0	0
02/02/2004 03:00:00	0	0	0	0	0	0	0	0	0	0	0	0	0
02/02/2004 04:00:00	0	0	0	0	0	0	0	0	0	0	0	0	0
02/02/2004 05:00:00	0	0	0	0	0	0	0	0	0	0	0	0	0
02/02/2004 06:00:00	0	0	0	0	0	0	0	0	0	0	0	0	0
02/02/2004 07:00:00	0	0	0	0	0	0	0	0	0	0	0	0	0
02/02/2004 08:00:00	0	0	0	0	0	0	0	0	0	0	0	0	0
02/02/2004 09:00:00	0	0	0	0	0	0	0	0	0	0	0	0	0
02/02/2004 10:00:00	0	0	0	0	0	0	0	0	0	0	0	0	0
02/02/2004 11:00:00	0	0	0	0	0	0	0	0	0	0	0	0	0
02/02/2004 12:00:00	0	0	0	0	0	0	0	0	0	0	0	0	0
02/02/2004 13:00:00	0	0	0	0	0	0	0	0	0	0	0	0	0
02/02/2004 14:00:00	0	0	0	0	0	0	0	0	0	0	0	0	0
02/02/2004 15:00:00	0	0	0	0	0	0	0	0	0	0	0	0	0
02/02/2004 16:00:00	0	0	0	0	0	0	0	0	0	0	0	0	0
02/02/2004 17:00:00	0	0	0	0	0	0	0	0	0	0	0	0	0
02/02/2004 18:00:00	0	0	0	0	0	0	0	0	0	0	0	0	0
02/02/2004 19:00:00	0	0	0	0	0	0	0	0	0	0	0	0	0
02/02/2004 20:00:00	0	0	0	0	0	0	0	0	0	0	0	0	0
02/02/2004 21:00:00	0	0	0	0	0	0	0	0	0	0	0	0	0
02/02/2004 22:00:00	0	0	0	0	0	0	0	0	0	0	0	0	0
02/02/2004 23:00:00	0	0	0	0	0	0	0	0	0	0	0	0	0
03/02/2004 00:00:00	0	0	0	0	0	0	0	0	0	0	0	0	0
03/02/2004 01:00:00	0	0	0	0	0	0	0	0	0	0	0	0	0
03/02/2004 02:00:00	0	0	0	0	0	0	0	0	0	0	0	0	0
03/02/2004 03:00:00	0	0	0	0	0	0	0	0	0	0	0	0	0
03/02/2004 04:00:00	0	0	0	0	0	0	0	0	0	0	0	0	0
03/02/2004 05:00:00	0	0	0	0	0	0	0	0	0	0	0	0	0
03/02/2004 06:00:00	0	0	0	0	0	0	0	0	0	0	0	0	0
03/02/2004 07:00:00	0	0	0	0	0	0	0	0	0	0	0	0	0
03/02/2004 08:00:00	0	0	0	0	0	0	0	0	0	0	0	0	0
03/02/2004 09:00:00	0	0	0	0	0	0	0	0	0	0	0	0	0
03/02/2004 10:00:00	0	0	0	0	0	0	0	0	0	0	0	0	0
03/02/2004 11:00:00	0	0	0	0	0	0	0	0	0	0	0	0	0
03/02/2004 12:00:00	0	0	0	0	0	0	0	0	0	0	0	0	0
03/02/2004 13:00:00	0	0	0	0	0	0	0	0	0	0	0	0	0
03/02/2004 14:00:00	0	0	0	0	0	0	0	0	0	0	0	0	0
03/02/2004 15:00:00	0	0	0	0	0	0	0	0	0	0	0	0	0
03/02/2004 16:00:00	0	0	0	0	0	0	0	0	0	0	0	0	0
03/02/2004 17:00:00	0	0	0	0	0	0	0	0	0	0	0	0	0
03/02/2004 18:00:00	0	0	0	0	0	0	0	0	0	0	0	0	0
03/02/2004 19:00:00	0	0	0	0	0	0	0	0	0	0	0	0	0
03/02/2004 20:00:00	0	0	0	0	0	0	0	0	0	0	0	0	0
03/02/2004 21:00:00	0	0	0	0	0	0	0	0	0	0	0	0	0
03/02/2004 22:00:00	0	0	0	0	0	0	0	0	0	0	0	0	0
03/02/2004 23:00:00	0	0	0	0	0	0	0	0	0	0	0	0	0
04/02/2004 00:00:00	0	0	0	0	0	0	0	0	0	0	0	0	0
04/02/2004 01:00:00	0	0	0	0	0	0	0	0	0	0	0	0	0
04/02/2004 02:00:00	0	0	0	0	0	0	0	0	0	0	0	0	0
04/02/2004 03:00:00	0	0	0	0	0	0	0	0	0	0	0	0	0
04/02/2004 04:00:00	0	0	0	0	0	0	0	0	0	0	0	0	0
04/02/2004 05:00:00	0	0	0	0	0	0	0	0	0	0	0	0	0
04/02/2004 06:00:00	0	0	0	0	0	0	0	0	0	0	0	0	0
04/02/2004 07:00:00	0	0	0	0	0	0	0	0	0	0	0	0	0
04/02/2004 08:00:00	0	0	0	0	0	0	0	0	0	0	0	0	0
04/02/2004 09:00:00	0	0	0	0	0	0	0	0	0	0	0	0	0
04/02/2004 10:00:00	0	0	0	0	0	0	0	0	0	0	0	0	0
04/02/2004 11:00:00	0	0	0	0	0	0	0	0	0	0	0	0	0
04/02/2004 12:00:00	0	0	0	0	0	0	0	0	0	0	0	0	0
04/02/2004 13:00:00	0	0	0	0	0	0	0	0	0	0	0	0	0
04/02/2004 14:00:00	0	0	0	0	0	0	0	0	0	0	0	0	0
04/02/2004 15:00:00	0	0	0	0	0	0	0	0	0	0	0	0	0
04/02/2004 16:00:00	0	0	0	0	0	0	0	0	0	0	0	0	0
04/02/2004 17:00:00	0	0	0	0	0	0	0	0	0	0	0	0	0
04/02/2004 18:00:00	0	0	0	0	0	0	0	0	0	0	0	0	0
04/02/2004 19:00:00	0	0	0	0	0	0	0	0	0	0	0	0	0
04/02/2004 20:00:00	0	0	0	0	0	0	0	0	0	0	0	0	0
04/02/2004 21:00:00	0	0	0	0	0	0	0	0	0	0	0	0	0
04/02/2004 22:00:00	0	0	0	0	0	0	0	0	0	0	0	0	0
04/02/2004 23:00:00	0	0	0	0	0	0	0	0	0	0	0	0	0
05/02/2004 00:00:00	0	0	0	0	0	0	0	0	0	0	0	0	0
05/02/2004 01:00:00	0	0	0	0	0	0	0	0	0	0	0	0	0
05/02/2004 02:00:00	0	0	0	0	0	0	0	0	0	0	0	0	0
05/02/2004 03:00:00	0	0	0	0	0	0	0	0	0	0	0	0	0
05/02/2004 04:00:00	0	0	0	0	0	0	0	0	0	0	0	0	0
05/02/2004 05:00:00	0	0	0	0	0	0	0	0	0	0	0	0	0
05/02/2004 06:00:00	0	0	0	0	0	0	0	0	0	0	0	0	0
05/02/2004 07:00:00	0	0	0	0	0	0	0	0	0	0	0	0	0
05/02/2004 08:00:00	0	0	0	0	0	0	0	0	0	0	0	0	0
05/02/2004 09:00:00	0	0	0	0	0	0	0	0	0	0	0	0	0
05/02/2004 10:00:00	0	0	0	0	0	0	0	0	0	0	0	0	0
05/02/2004 11:00:00	0	0	0	0	0	0	0	0	0	0	0	0	0
05/02/2004 12:00:00	0	0	0	0	0	0	0	0	0	0	0	0	0
05/02/2004 13:00:00	0	0	0	0	0	0	0	0	0	0	0	0	0
05/02/2004 14:00:00	0	0	0	0	0	0	0	0	0	0	0	0	0
05/02/2004 15:00:00	0	0	0	0	0	0	0	0	0	0	0	0	0
05/02/2004 16:00:00	0	0	0	0	0	0	0	0	0	0	0	0	0
05/02/2004 17:00:00	0	0	0	0	0	0	0	0	0	0	0	0	0
05/02/2004 18:00:00	0	0	0	0	0	0	0	0	0	0	0	0	0
05/02/2004 19:00:00	0	0	0	0	0	0	0	0	0	0	0	0	0
05/02/2004 20:00:00	0	0	0	0	0	0	0	0	0	0	0	0	0
05/02/2004 21:00:00	0	0	0	0	0	0	0	0	0	0	0	0	0
05/02/2004 22:00:00	0	0	0	0	0	0	0	0	0	0	0	0	0
05/02/2004 23:00:00	0	0	0	0	0	0	0	0	0	0	0	0	0
06/02/2004 00:00:00	0	0	0	0	0	0	0	0	0	0	0	0	0
06/02/2004 01:00:00	0	0	0	0	0	0	0	0	0	0	0	0	0
06/02/2004 02:00:00	0	0	0	0	0	0	0	0	0	0	0	0	0
06/02/2004 03:00:00	0	0	0	0	0	0	0	0	0	0	0	0	0
06/02/2004 04:00:00	0	0	0	0	0	0	0	0	0	0	0	0	0
06/02/2004 05:00:00	0	0	0	0	0	0	0	0	0	0	0	0	0
06/02/2004 06:00:00	0	0	0	0	0	0	0	0	0	0	0	0	0
06/02/2004 07:00:00	0	0	0	0	0	0	0	0	0	0	0	0	0
06/02/2004 08:00:00	0	0	0	0	0	0	0	0	0	0	0	0	0
06/02/2004 09:00:00	0	0	0	0	0	0	0	0	0	0	0	0	0
06/02/2004 10:00:00	0	0	0	0	0	0	0	0	0	0	0	0	0
06/02/2004 11:00:00	0	0	0	0	0	0	0	0	0	0	0	0	0
06/02/2004 12:00:00	0	0	0	0	0	0	0	0	0	0	0	0	0
06/02/2004 13:00:00	0	0	0	0	0	0	0	0	0	0	0	0	0
06/02/2004 14:00:00	0	0	0	0	0	0	0	0	0	0	0	0	0
06/02/2004 15:00:00	0	0	0	0	0	0	0	0	0	0	0	0	0
06/02/2004 16:00:00	0	0	0	0	0	0	0	0	0	0	0	0	0
06/02/2004 17:00:00	0	0	0	0	0	0	0	0	0	0	0	0	0
06/02/2004 18:00:00	0	0	0	0	0	0	0	0	0	0	0	0	0
06/02/2004 19:00:00	0	0	0	0	0	0	0	0	0	0	0	0	0
06/02/2004 20:00:00	0	0	0	0	0	0	0	0	0	0	0	0	0
06/02/2004 21:00:00	0	0	0	0	0	0	0	0	0	0	0	0	0
06/02/2004 22:00:00	0	0	0	0	0	0	0	0	0	0	0	0	0
06/02/2004 23:00:00	0	0	0	0	0	0	0	0	0	0	0	0	0
07/02/2004 00:00:00	0	0	0	0	0	0	0	0	0	0	0	0	0
07/02/2004 01:00:00	0	0	0	0	0	0	0	0	0	0	0	0	0
07/02/2004 02:00:00	0	0	0	0	0	0	0	0	0	0	0	0	0
07/02/2004 03:00:00	0	0	0	0	0	0	0	0	0	0	0	0	0
07/02/2004 04:00:00	0	0	0	0	0	0	0	0	0	0	0	0	0
07/02/2004 05:00:00	0	0	0	0	0	0	0	0	0	0	0	0	0
07/02/2004 06:00:00	0	0	0	0	0	0	0	0	0	0	0	0	0
07/02/2004 07:00:00	0	0	0	0	0	0	0	0	0	0	0	0	0
07/02/2004 08:00:00	0	0	0	0	0	0	0	0	0	0	0	0	0
07/02/2004 09:00:00	0	0	0	0	0	0	0	0	0	0	0	0	0
07/02/2004 10:00:00	0	0	0	0	0	0	0	0	0	0	0	0	0
07/02/2004 11:00:00	0	0	0	0	0	0	0	0	0	0	0	0	0
07/02/2004 12:00:00	0	0	0	0	0	0	0	0	0	0	0	0	0
07/02/2004 13:00:00	0	0	0	0	0	0	0	0	0	0	0	0	0
07/02/2004 14:00:00	0	0	0	0	0	0	0	0	0	0	0	0	0
07/02/2004 15:00:00	0	0	0	0	0	0	0	0	0	0	0	0	0
07/02/2004 16:00:00	0	0	0	0	0	0	0	0	0	0	0	0	0
07/02/2004 17:00:00	0	0	0	0	0	0	0	0	0	0	0	0	0
07/02/2004 18:00:00	0	0	0	0	0	0	0	0	0	0	0	0	0
07/02/2004 19:00:00	0	0	0	0	0	0	0	0	0	0	0	0	0
07/02/2004 20:00:00	0	0	0	0	0	0	0	0	0	0	0	0	0
07/02/2004 21:00:00	0	0	0	0	0	0	0	0	0	0	0	0	0
07/02/2004 22:00:00	0	0	0	0	0	0	0	0	0	0	0	0	0
07/02/2004 23:00:00	0	0	0	0	0	0	0	0	0	0	0	0	0
08/02/2004 00:00:00	0	0	0	0	0	0	0	0	0	0	0	0	0
08/02/2004 01:00:00	0	0	0	0	0	0	0	0	0	0	0	0	0
08/02/2004 02:00:00	0	0	0	0	0	0	0	0	0	0	0	0	0
08/02/2004 03:00:00	0	0	0	0	0	0	0	0	0	0	0	0	0
08/02/2004 04:00:00	0	0	0	0	0	0	0	0	0	0	0	0	0
08/02/2004 05:00:00	0	0	0	0	0	0	0	0	0	0	0	0	0
08/02/2004 06:00:00	0	0	0	0	0	0	0	0	0	0	0	0	0
08/02/2004 07:00:00	0	0	0	0	0	0	0	0	0	0	0	0	0
08/02/2004 08:00:00	0	0	0	0	0	0	0	0	0	0	0	0	0
08/02/2004 09:00:00	0	0	0	0	0	0	0	0	0	0	0	0	0
08/02/2004 10:00:00	0	0	0	0	0	0	0	0	0	0	0	0	0
08/02/2004 11:00:00	0	0	0	0	0	0	0	0	0	0	0	0	0
08/02/2004 12:00:00	0	0	0	0	0	0	0	0	0	0	0	0	0
08/02/2004 13:00:00	0	0	0	0	0	0	0	0	0	0	0	0	0
08/02/2004 14:00:00	0	0	0	0	0	0	0	0	0	0	0	0	0
08/02/2004 15:00:00	0	0	0	0	0	0	0	0	0	0	0	0	0
08/02/2004 16:00:00	0	0	0	0	0	0	0	0	0	0	0	0	0
08/02/2004 17:00:00	0	0	0	0	0	0	0	0	0	0	0	0	0
08/02/2004 18:00:00	0	0	0	0	0	0	0	0	0	0	0	0	0
08/02/2004 19:00:00	0	0	0	0	0	0	0	0	0	0	0	0	0
08/02/2004 20:00:00	0	0	0	0	0	0	0	0	0	0	0	0	0
08/02/2004 21:00:00	0	0	0	0	0	0	0	0	0	0	0	0	0
08/02/2004 22:00:00	0	0	0	0	0	0	0	0	0	0	0	0	0
08/02/2004 23:00:00	0	0	0	0	0	0	0	0	0	0	0	0	0
09/02/2004 00:00:00	0	0	0	0	0	0	0	0	0	0	0	0	0
09/02/2004 01:00:00	0	0	0	0	0	0	0	0	0	0	0	0	0
09/02/2004 02:00:00	0	0	0	0	0	0	0	0	0	0	0	0	0
09/02/2004 03:00:00	0	0	0	0	0	0	0	0	0	0	0	0	0
09/02/2004 04:00:00	0	0	0	0	0	0	0	0	0	0	0	0	0
09/02/2004 05:00:00	0	0	0	0	0	0	0	0	0	0	0	0	0
09/02/2004 06:00:00	0	0	0	0	0	0	0	0	0	0	0	0	0
09/02/2004 07:00:00	0	0	0	0	0	0	0	0	0	0	0	0	0
09/02/2004 08:00:00	0	0	0	0	0	0	0	0	0	0	0	0	0
09/02/2004 09:00:00	0	0	0	0	0	0	0	0	0	0	0	0	0
09/02/2004 10:00:00	0	0	0	0	0	0	0	0	0	0	0	0	0
09/02/2004 11:00:00	0	0	0	0	0	0	0	0	0	0	0	0	0
09/02/2004 12:00:00	0	0	0	0	0	0	0	0	0	0	0	0	0
09/02/2004 13:00:00	0	0	0	0	0	0	0	0	0	0	0	0	0
09/02/2004 14:00:00	0	0	0	0	0	0	0	0	0	0	0	0	0
09/02/2004 15:00:00	0	0	0	0	0	0	0	0	0	0	0	0	0
09/02/2004 16:00:00	0	0	0	0	0	0	0	0	0	0	0	0	0
09/02/2004 17:00:00	0	0	0	0	0	0	0	0	0	0	0	0	0
09/02/2004 18:00:00	0	0	0	0	0	0	0	0	0	0	0	0	0
09/02/2004 19:00:00	0	0	0	0	0	0	0	0	0	0	0	0	0
09/02/2004 20:00:00	0	0	0	0	0	0	0	0	0	0	0	0	0
09/02/2004 21:00:00	0	0	0	0	0	0	0	0	0	0	0	0	0
09/02/2004 22:00:00	0	0	0	0	0	0	0	0	0	0	0	0	0
09/02/2004 23:00:00	0	0	0	0	0	0	0	0	0	0	0	0	0
10/02/2004 00:00:00	0	0	0	0	0	0	0	0	0	0	0	0	0
10/02/2004 01:00:00	0	0	0	0	0	0	0	0	0	0	0	0	0
10/02/2004 02:00:00	0	0	0	0	0	0	0	0	0	0	0	0	0
10/02/2004 03:00:00	0	0	0	0	0	0	0	0	0	0	0	0	0
10/02/2004 04:00:00	0	0	0	0	0	0	0	0	0	0	0	0	0
10/02/2004 05:00:00	0	0	0	0	0	0	0	0	0	0	0	0	0
10/02/2004 06:00:00	0	0	0	0	0	0	0	0	0	0	0	0	0
10/02/2004 07:00:00	0	0	0	0	0	0	0	0	0	0	0	0	0
10/02/2004 08:00:00	0	0	0	0	0	0	0	0	0	0	0	0	0
10/02/2004 09:00:00	0	0	0	0	0	0	0	0	0	0	0	0	0
10/02/2004 10:00:00	0	0	0	0	0	0	0	0	0	0	0	0	0
10/02/2004 11:00:00	0	0	0	0	0	0	0	0	0	0	0	0	0
10/02/2004 12:00:00	0	0	0	0	0	0	0	0	0	0	0	0	0
10/02/2004 13:00:00	0	0	0	0	0	0	0	0	0	0	0	0	0
10/02/2004 14:00:00	0	0	0	0	0	0	0	0	0	0	0	0	0
10/02/2004 15:00:00	0	0	0	0	0	0	0	0	0	0	0	0	0
10/02/2004 16:00:00	0	0	0	0	0	0	0	0	0	0	0	0	0
10/02/2004 17:00:00	0	0	0	0	0	0	0	0	0	0	0	0	0
10/02/2004 18:00:00	0	0	0	0	0	0	0	0	0	0	0	0	0
10/02/2004 19:00:00	0	0	0	0	0	0	0	0	0	0	0	0	0
10/02/2004 20:00:00	0	0	0	0	0	0	0	0	0	0	0	0	0
10/02/2004 21:00:00	0	0	0	0	0	0	0	0	0	0	0	0	0
10/02/2004 22:00:00	0	0	0	0	0	0	0	0	0	0	0	0	0
10/02/2004 23:00:00	0	0	0	0	0	0	0	0	0	0	0	0	0
11/02/2004 00:00:00	0	0	0	0	0	0	0	0	0	0	0	0	0
11/02/2004 01:00:00	0	0	0	0	0	0	0	0	0	0	0	0	0
11/02/2004 02:00:00	0	0	0	0	0	0	0	0	0	0	0	0	0
11/02/2004 03:00:00	0	0	0	0	0	0	0	0	0	0	0	0	0
11/02/2004 04:00:00	0	0	0	0	0	0	0	0	0	0	0	0	0
11/02/2004 05:00:00	0	0	0	0	0	0	0	0	0	0	0	0	0
11/02/2004 06:00:00	0	0	0	0	0	0	0	0	0	0	0	0	0
11/02/2004 07:00:00	0	0	0	0	0	0	0	0	0	0	0	0	0
11/02/2004 08:00:00	0	0	0	0	0	0	0	0	0	0	0	0	0
11/02/2004 09:00:00	0	0	0	0	0	0	0	0	0	0	0	0	0
11/02/2004 10:00:00	0	0	0	0	0	0	0	0	0	0	0	0	0
11/02/2004 11:00:00	0	0	0	0	0	0	0	0	0	0	0	0	0
11/02/2004 12:00:00	0	0	0	0	0	0	0	0	0	0	0	0	0
11/02/2004 13:00:00	0	0	0	0	0	0	0	0	0	0	0	0	0
11/02/2004 14:00:00	0	0	0	0	0	0	0	0	0	0	0	0	0
11/02/2004 15:00:00	0	0	0	0	0	0	0	0	0	0	0	0	0
11/02/2004 16:00:00	0	0	0	0	0	0	0	0	0	0	0	0	0
11/02/2004 17:00:00	0	0	0	0	0	0	0	0	0	0	0	0	0
11/02/2004 18:00:00	0	0	0	0	0	0	0	0	0	0	0	0	0
11/02/2004 19:00:00	0	0	0	0	0	0	0	0	0	0	0	0	0
11/02/2004 20:00:00	0	0	0	0	0	0	0	0	0	0	0	0	0
11/02/2004 21:00:00	0	0	0	0	0	0	0	0	0	0	0	0	0
11/02/2004 22:00:00	0	0	0	0	0	0	0	0	0	0	0	0	0
11/02/2004 23:00:00	0	0	0	0	0	0	0	0	0	0	0	0	0
12/02/2004 00:00:00	0	0	0	0	0	0	0	0	0	0	0	0	0
12/02/2004 01:00:00	0	0	0	0	0	0	0	0	0	0	0	0	0
12/02/2004 02:00:00	0	0	0	0	0	0	0	0	0	0	0	0	0
12/02/2004 03:00:00	0	0	0	0	0	0	0	0	0	0	0	0	0
12/02/2004 04:00:00	0	0	0	0	0	0	0	0	0	0	0	0	0
12/02/2004 05:00:00	0	0	0	0	0	0	0	0	0	0	0	0	0
12/02/2004 06:00:00	0	0	0	0	0	0	0	0	0	0	0	0	0
12/02/2004 07:00:00	0	0	0	0	0	0	0	0	0	0	0	0	0
12/02/2004 08:00:00	0	0	0	0	0	0	0	0	0	0	0	0	0
12/02/2004 09:00:00	0	0	0	0	0	0	0	0	0	0	0	0	0
12/02/2004 10:00:00	0	0	0	0	0	0	0	0	0	0	0	0	0
12/02/2004 11:00:00	0	0	0	0	0	0	0	0	0	0	0	0	0
12/02/2004 12:00:00	0	0	0	0	0	0	0	0	0	0	0	0	0
12/02/2004 13:00:00	0	0	0	0	0	0	0	0	0	0	0	0	0
12/02/2004 14:00:00	0	0	0	0	0	0	0	0	0	0	0	0	0
12/02/2004 15:00:00	0	0	0	0	0	0	0	0	0	0	0	0	0
12/02/2004 16:00:00	0	0	0	0	0	0	0	0	0	0	0	0	0
12/02/2004 17:00:00	0	0	0	0	0	0	0	0	0	0	0	0	0
12/02/2004 18:00:00	0	0	0	0	0	0	0	0	0	0	0	0	0
12/02/2004 19:00:00	0	0	0	0	0	0	0	0	0	0	0	0	0
12/02/2004 20:00:00	0	0	0	0	0	0	0	0	0	0	0	0	0
12/02/2004 21:00:00	0	0	0	0	0	0	0	0	0	0	0	0	0
12/02/2004 22:00:00	0	0	0	0	0	0	0	0	0	0	0	0	0
12/02/2004 23:00:00	0	0	0	0	0	0	0	0	0	0	0	0	0
13/02/2004 00:00:00	0	0	0	0	0	0	0	0	0	0	0	0	0
13/02/2004 01:00:00	0	0	0	0	0	0	0	0	0	0	0	0	0
13/02/2004 02:00:00	0	0	0	0	0	0	0	0	0	0	0	0	0
13/02/2004 03:00:00	0	0	0	0	0	0	0	0	0	0	0	0	0
13/02/2004 04:00:00	0	0	0	0	0	0	0	0	0	0	0	0	0
13/02/2004 05:00:00	0	0	0	0	0	0	0	0	0	0	0	0	0
13/02/2004 06:00:00	0	0	0	0	0	0	0	0	0	0	0	0	0
13/02/2004 07:00:00	0	0	0	0	0	0	0	0	0	0	0	0	0
13/02/2004 08:00:00	0	0	0	0	0	0	0	0	0	0	0	0	0
13/02/2004 09:00:00	0	0	0	0	0	0	0	0	0	0	0	0	0
13/02/2004 10:00:00	0	0	0	0	0	0	0	0	0	0	0	0	0
13/02/2004 11:00:00	0	0	0	0	0	0	0	0	0	0	0	0	0
13/02/2004 12:00:00	0	0	0	0	0	0	0	0	0	0	0	0	0
13/02/2004 13:00:00	0	0	0	0	0	0	0	0	0	0	0	0	0
13/02/2004 14:00:00	0	0	0	0	0	0	0	0	0	0	0	0	0
13/02/2004 15:00:00	0	0	0	0	0	0	0	0	0	0	0	0	0
13/02/2004 16:00:00	0	0	0	0	0	0	0	0	0	0	0	0	0
13/02/2004 17:00:00	0	0	0	0	0	0	0	0	0	0	0	0	0
13/02/2004 18:00:00	0	0	0	0	0	0	0	0	0	0	0	0	0
13/02/2004 19:00:00	0	0	0	0	0	0	0	0	0	0	0	0	0
13/02/2004 20:00:00	0	0	0	0	0	0	0	0	0	0	0	0	0
13/02/2004 21:00:00	0	0	0	0	0	0	0	0	0	0	0	0	0
13/02/2004 22:00:00	0	0	0	0	0	0	0	0	0	0	0	0	0
13/02/2004 23:00:00	0	0	0	0	0	0	0	0	0	0	0	0	0
14/02/2004 00:00:00	0	0	0	0	0	0	0	0	0	0	0	0	0
14/02/2004 01:00:00	0	0	0	0	0	0	0	0	0	0	0	0	0
14/02/2004 02:00:00	0	0	0	0	0	0	0	0	0	0	0	0	0
14/02/2004 03:00:00	0	0	0	0	0	0	0	0	0	0	0	0	0
14/02/2004 04:00:00	0	0	0	0	0	0	0	0	0	0	0	0	0
14/02/2004 05:00:00	0	0	0	0	0	0	0	0	0	0	0	0	0
14/02/2004 06:00:00	0	0	0	0	0	0	0	0	0	0	0	0	0
14/02/2004 07:00:00	0	0	0	0	0	0	0	0	0	0	0	0	0
14/02/2004 08:00:00	0	0	0	0	0	0	0	0	0	0	0	0	0
14/02/2004 09:00:00	0	0	0	0	0	0	0	0	0	0	0	0	0
14/02/2004 10:00:00	0	0	0	0	0	0	0	0	0	0	0	0	0
14/02/2004 11:00:00	0	0	0	0	0	0	0	0	0	0	0	0	0
14/02/2004 12:00:00	0	0	0	0	0	0	0	0	0	0	0	0	0
14/02/2004 13:00:00	0	0	0	0	0	0	0	0	0	0	0	0	0
14/02/2004 14:00:00	0	0	0	0	0	0	0	0	0	0	0	0	0
14/02/2004 15:00:00	0	0	0	0	0	0	0	0	0	0	0	0	0
14/02/2004 16:00:00	0	0	0	0	0	0	0	0	0	0	0	0	0
14/02/2004 17:00:00	0	0	0	0	0	0	0	0	0	0	0	0	0
14/02/2004 18:00:00	0	0	0	0	0	0	0	0	0	0	0	0	0
14/02/2004 19:00:00	0	0	0	0	0	0	0	0	0	0	0	0	0
14/02/2004 20:00:00	0	0	0	0	0	0	0	0	0	0	0	0	0
14/02/2004 21:00:00	0	0	0	0	0	0	0	0	0	0	0	0	0
14/02/2004 22:00:00	0	0	0	0	0	0	0	0	0	0	0	0	0
14/02/2004 23:00:00	0	0	0	0	0	0	0	0	0	0	0	0	0
15/02/2004 00:00:00	0	0	0	0	0	0	0	0	0	0	0	0	0
15/02/2004 01:00:00	0	0	0	0	0	0	0	0	0	0	0	0	0
15/02/2004 02:00:00	0	0	0	0	0	0	0	0	0	0	0	0	0
15/02/2004 03:00:00	0	0	0	0	0	0	0	0	0	0	0	0	0
15/02/2004 04:00:00	0	0	0	0	0	0	0	0	0	0	0	0	0
15/02/2004 05:00:00	0	0	0	0	0	0	0	0	0	0	0	0	0
15/02/2004 06:00:00	0	0	0	0	0	0	0	0	0	0	0	0	0
15/02/2004 07:00:00	0	0	0	0	0	0	0	0	0	0	0	0	0
15/02/2004 08:00:00	0	0	0	0	0	0	0	0	0	0	0	0	0
15/02/2004 09:00:00	0	0	0	0	0	0	0	0	0	0	0	0	0
15/02/2004 10:00:00	0	0	0	0	0	0	0	0	0	0	0	0	0
15/02/2004 11:00:00	0	0	0	0	0	0	0	0	0	0	0	0	0
15/02/2004 12:00:00	0	0	0	0	0	0	0	0	0	0	0	0	0
15/02/2004 13:00:00	0	0	0	0	0	0	0	0	0	0	0	0	0
15/02/2004 14:00:00	0	0	0	0	0	0	0	0	0	0	0	0	0
15/02/2004 15:00:00	0	0	0	0	0	0	0	0	0	0	0	0	0
15/02/2004 16:00:00	0	0	0	0	0	0	0	0	0	0	0	0	0
15/02/2004 17:00:00	0	0	0	0	0	0	0	0	0	0	0	0	0
15/02/2004 18:00:00	0	0	0	0	0	0	0	0	0	0	0	0	0
15/02/2004 19:00:00	0	0	0	0	0	0	0	0	0	0	0	0	0
15/02/2004 20:00:00	0	0	0	0	0	0	0	0	0	0	0	0	0
15/02/2004 21:00:00	0	0	0	0	0	0	0	0	0	0	0	0	0
15/02/2004 22:00:00	0	0	0	0	0	0	0	0	0	0	0	0	0
15/02/2004 23:00:00	0	0	0	0	0	0	0	0	0	0	0	0	0
16/02/2004 00:00:00	0	0	0	0	0	0	0	0	0	0	0	0	0
16/02/2004 01:00:00	0	0	0	0	0	0	0	0	0	0	0	0	0
16/02/2004 02:00:00	0	0	0	0	0	0	0	0	0	0	0	0	0
16/02/2004 03:00:00	0	0	0	0	0	0	0	0	0	0	0	0	0
16/02/2004 04:00:00	0	0	0	0	0	0	0	0	0	0	0	0	0
16/02/2004 05:00:00	0	0	0	0	0	0	0	0	0	0	0	0	0
16/02/2004 06:00:00	0	0	0	0	0	0	0	0	0	0	0	0	0
16/02/2004 07:00:00	0	0	0	0	0	0	0	0	0	0	0	0	0
16/02/2004 08:00:00	0	0	0	0	0	0	0	0	0	0	0	0	0
16/02/2004 09:00:00	0	0	0	0	0	0	0	0	0	0	0	0	0
16/02/2004 10:00:00	0	0	0	0	0	0	0	0	0	0	0	0	0
16/02/2004 11:00:00	0	0	0	0	0	0	0	0	0	0	0	0	0
16/02/2004 12:00:00	0	0	0	0	0	0	0	0	0	0	0	0	0
16/02/2004 13:00:00	0	0	0	0	0	0	0	0	0	0	0	0	0
16/02/2004 14:00:00	0	0	0	0	0	0	0	0	0	0	0	0	0
16/02/2004 15:00:00	0	0	0	0	0	0	0	0	0	0	0	0	0
16/02/2004 16:00:00	0	0	0	0	0	0	0	0	0	0	0	0	0
16/02/2004 17:00:00	0	0	0	0	0	0	0	0	0	0	0	0	0
16/02/2004 18:00:00	0	0	0	0	0	0	0	0	0	0	0	0	0
16/02/2004 19:00:00	0	0	0	0	0	0	0	0	0	0	0	0	0
16/02/2004 20:00:00	0	0	0	0	0	0	0	0	0	0	0	0	0
16/02/2004 21:00:00	0	0	0	0	0	0	0	0	0	0	0	0	0
16/02/2004 22:00:00	0	0	0	0	0	0	0	0	0	0	0	0	0
16/02/2004 23:00:00	0	0	0	0	0	0	0	0	0	0	0	0	0
17/02/2004 00:00:00	0	0	0	0	0	0	0	0	0	0	0	0	0
17/02/2004 01:00:00	0	0	0	0	0	0	0	0	0	0	0	0	0
17/02/2004 02:00:00	0	0	0	0	0	0	0	0	0	0	0	0	0
17/02/2004 03:00:00	0	0	0	0	0	0	0	0	0	0	0	0	0
17/02/2004 04:00:00	0	0	0	0	0	0	0	0	0	0	0	0	0
17/02/2004 05:00:00	0	0	0	0	0	0	0	0	0	0	0	0	0
17/02/2004 06:00:00	0	0	0	0	0	0	0	0	0	0	0	0	0
17/02/2004 07:00:00	0	0	0	0	0	0	0	0	0	0	0	0	0
17/02/2004 08:00:00	0	0	0	0	0	0	0	0	0	0	0	0	0
17/02/2004 09:00:00	0	0	0	0	0	0	0	0	0	0	0	0	0
17/02/2004 10:00:00	0	0	0	0	0	0	0	0	0	0	0	0	0
17/02/2004 11:00:00	0	0	0	0	0	0	0	0	0	0	0	0	0
17/02/2004 12:00:00	0	0	0	0	0	0	0	0	0	0	0	0	0
17/02/2004 13:00:00	0	0	0	0	0	0	0	0	0	0	0	0	0
17/02/2004 14:00:00	0	0	0	0	0	0	0	0	0	0	0	0	0
17/02/2004 15:00:00	0	0	0	0	0	0	0	0	0	0	0	0	0
17/02/2004 16:00:00	0	0	0	0	0	0	0	0	0	0	0	0	0
17/02/2004 17:00:00	0	0	0	0	0	0	0	0	0	0	0	0	0
17/02/2004 18:00:00	0	0	0	0	0	0	0	0	0	0	0	0	0
17/02/2004 19:00:00	0	0	0	0	0	0	0	0	0	0	0	0	0
17/02/2004 20:00:00	0	0	0	0	0	0	0	0	0	0	0	0	0
17/02/2004 21:00:00	0	0	0	0	0	0	0	0	0	0	0	0	0
17/02/2004 22:00:00	0	0	0	0	0	0	0	0	0	0	0	0	0
17/02/2004 23:00:00	0	0	0	0	0	0	0	0	0	0	0	0	0
18/02/2004 00:00:00	0	0	0	0	0	0	0	0	0	0	0	0	0
18/02/2004 01:00:00	0	0	0	0	0	0	0	0	0	0	0	0	0
18/02/2004 02:00:00	0	0	0	0	0	0	0	0	0	0	0	0	0
18/02/2004 03:00:00	0	0	0	0	0	0	0	0	0	0	0	0	0
18/02/2004 04:00:00	0	0	0	0	0	0	0	0	0	0	0	0	0
18/02/2004 05:00:00	0	0	0	0	0	0	0	0	0	0	0	0	0
18/02/2004 06:00:00	0	0	0	0	0	0	0	0	0	0	0	0	0
18/02/2004 07:00:00	0	0	0	0	0	0	0	0	0	0	0	0	0
18/02/2004 08:00:00	0	0	0	0	0	0	0	0	0	0	0	0	0
18/02/2004 09:00:00	0	0	0	0	0	0	0	0	0	0	0	0	0
18/02/2004 10:00:00	0	0	0	0	0	0	0	0	0	0	0	0	0
18/02/2004 11:00:00	0	0	0	0	0	0	0	0	0	0	0	0	0
18/02/2004 12:00:00	0	0	0	0	0	0	0	0	0	0	0	0	0
18/02/2004 13:00:00	0	0	0	0	0	0	0	0	0	0	0	0	0
18/02/2004 14:00:00	0	0	0	0	0	0	0	0	0	0	0	0	0
18/02/2004 15:00:00	0	0	0	0	0	0	0	0	0	0	0	0	0
18/02/2004 16:00:00	0	0	0	0	0	0	0	0	0	0	0	0	0
18/02/2004 17:00:00	0	0	0	0	0	0	0	0	0	0	0	0	0
18/02/2004 18:00:00	0	0	0	0	0	0	0	0	0	0	0	0	0
18/02/2004 19:00:00	0	0	0	0	0	0	0	0	0	0	0	0	0
18/02/2004 20:00:00	0	0	0	0	0	0	0	0	0	0	0	0	0
18/02/2004 21:00:00	0	0	0	0	0	0	0	0	0	0	0	0	0
18/02/2004 22:00:00	0	0	0	0	0	0	0	0	0	0	0	0	0
18/02/2004 23:00:00	0	0	0	0	0	0	0	0	0	0	0	0	0
19/02/2004 00:00:00	0	0	0	0	0	0	0	0	0	0	0	0	0
19/02/2004 01:00:00	0	0	0	0	0	0	0	0	0	0	0	0	0
19/02/2004 02:00:00	0	0	0	0	0	0	0	0	0	0	0	0	0
19/02/2004 03:00:00	0	0	0	0	0	0	0	0	0	0	0	0	0
19/02/2004 04:00:00	0	0	0	0	0	0	0	0	0	0	0	0	0
19/02/2004 05:00:00	0	0	0	0	0	0	0	0	0	0	0	0	0
19/02/2004 06:00:00	0	0	0	0	0	0	0	0	0	0	0	0	0
19/02/2004 07:00:00	0	0	0	0	0	0	0	0	0	0	0	0	0
19/02/2004 08:00:00	0	0	0	0	0	0	0	0	0	0	0	0	0
19/02/2004 09:00:00	0	0	0	0	0	0	0	0	0	0	0	0	0
19/02/2004 10:00:00	0	0	0	0	0	0	0	0	0	0	0	0	0
19/02/2004 11:00:00	0	0	0	0	0	0	0	0	0	0	0	0	0
19/02/2004 12:00:00	0	0	0	0	0	0	0	0	0	0	0	0	0
19/02/2004 13:00:00	0	0	0	0	0	0	0	0	0	0	0	0	0
19/02/2004 14:00:00	0	0	0	0	0	0	0	0	0	0	0	0	0
19/02/2004 15:00:00	0	0	0	0	0	0	0	0	0	0	0	0	0
19/02/2004 16:00:00	0	0	0	0	0	0	0	0	0	0	0	0	0
19/02/2004 17:00:00	0	0	0	0	0	0	0	0	0	0	0	0	0
19/02/2004 18:00:00	0	0	0	0	0	0	0	0	0	0	0	0	0
19/02/2004 19:00:00	0	0	0	0	0	0	0	0	0	0	0	0	0
19/02/2004 20:00:00	0	0	0	0	0	0	0	0	0	0	0	0	0
19/02/2004 21:00:00	0	0	0	0	0	0	0	0	0	0	0	0	0
19/02/2004 22:00:00	0	0	0	0	0	0	0	0	0	0	0	0	0
19/02/2004 23:00:00	0	0	0	0	0	0	0	0	0	0	0	0	0
20/02/2004 00:00:00	0	0	0	0	0	0	0	0	0	0	0	0	0
20/02/2004 01:00:00	0	0	0	0	0	0	0	0	0	0	0	0	0
20/02/2004 02:00:00	0	0	0	0	0	0	0	0	0	0	0	0	0
20/02/2004 03:00:00	0	0	0	0	0	0	0	0	0	0	0	0	0
20/02/2004 04:00:00	0	0	0	0	0	0	0	0	0	0	0	0	0
20/02/2004 05:00:00	0	0	0	0	0	0	0	0	0	0	0	0	0
20/02/2004 06:00:00	0	0	0	0	0	0	0	0	0	0	0	0	0
20/02/2004 07:00:00	0	0	0	0	0	0	0	0	0	0	0	0	0
20/02/2004 08:00:00	0	0	0	0	0	0	0	0	0	0	0	0	0
20/02/2004 09:00:00	0	0	0	0	0	0	0	0	0	0	0	0	0
20/02/2004 10:00:00	0	0	0	0	0	0	0	0	0	0	0	0	0
20/02/2004 11:00:00	0	0	0	0	0	0	0	0	0	0	0	0	0
20/02/2004 12:00:00	0	0	0	0	0	0	0	0	0	0	0	0	0
20/02/2004 13:00:00	0	0	0	0	0	0	0	0	0	0	0	0	0
20/02/2004 14:00:00	0	0	0	0	0	0	0	0	0	0	0	0	0
20/02/2004 15:00:00	0	0	0	0	0	0	0	0	0	0	0	0	0
20/02/2004 16:00:00	0	0	0	0	0	0	0	0	0	0	0	0	0
20/02/2004 17:00:00	0	0	0	0	0	0	0	0	0	0	0	0	0
20/02/2004 18:00:00	0	0	0	0	0	0	0	0	0	0	0	0	0
20/02/2004 19:00:00	0	0	0	0	0	0	0	0	0	0	0	0	0
20/02/2004 20:00:00	0	0	0	0	0	0	0	0	0	0	0	0	0
20/02/2004 21:00:00	0	0	0	0	0	0	0	0	0	0	0	0	0
20/02/2004 22:00:00	0	0	0	0	0	0	0	0	0	0	0	0	0
20/02/2004 23:00:00	0	0	0	0	0	0	0	0	0	0	0	0	0
21/02/2004 00:00:00	0	0	0	0	0	0	0	0	0	0	0	0	0
21/02/2004 01:00:00	0	0	0	0	0	0	0	0	0	0	0	0	0
21/02/2004 02:00:00	0	0	0	0	0	0	0	0	0	0	0	0	0
21/02/2004 03:00:00	0	0	0	0	0	0	0	0	0	0	0	0	0
21/02/2004 04:00:00	0	0	0	0	0	0	0	0	0	0	0	0	0
21/02/2004 05:00:00	0	0	0	0	0	0	0	0	0	0	0	0	0
21/02/2004 06:00:00	0	0	0	0	0	0	0	0	0	0	0	0	0
21/02/2004 07:00:00	0	0	0	0	0	0	0	0	0	0	0	0	0
21/02/2004 08:00:00	0	0	0	0	0	0	0	0	0	0	0	0	0
21/02/2004 09:00:00	0	0	0	0	0	0	0	0	0	0	0	0	0
21/02/2004 10:00:00	0	0	0	0	0	0	0	0	0	0	0	0	0
21/02/2004 11:00:00	0	0	0	0	0	0	0	0	0	0	0	0	0
21/02/2004 12:00:00	0	0	0	0	0	0	0	0	0	0	0	0	0
21/02/2004 13:00:00	0	0	0	0	0	0	0	0	0	0	0	0	0
21/02/2004 14:00:00	0	0	0	0	0	0	0	0	0	0	0	0	0
21/02/2004 15:00:00	0	0	0	0	0	0	0	0	0	0	0	0	0
21/02/2004 16:00:00	0	0	0	0	0	0	0	0	0	0	0	0	0
21/02/2004 17:00:00	0	0	0	0	0	0	0	0	0	0	0	0	0
21/02/2004 18:00:00	0	0	0	0	0	0	0	0	0	0	0	0	0
21/02/2004 19:00:00	0	0	0	0	0	0	0	0	0	0	0	0	0
21/02/2004 20:00:00	0	0	0	0	0	0	0	0	0	0	0	0	0
21/02/2004 21:00:00	0	0	0	0	0	0	0	0	0	0	0	0	0
21/02/2004 22:00:00	0	0	0	0	0	0	0	0	0	0	0	0	0
21/02/2004 23:00:00	0	0	0	0	0	0	0	0	0	0	0	0	0
22/02/2004 00:00:00	0	0	0	0	0	0	0	0	0	0	0	0	0
22/02/2004 01:00:00	0	0	0	0	0	0	0	0	0	0	0	0	0
22/02/2004 02:00:00	0	0	0	0	0	0	0	0	0	0	0	0	0
22/02/2004 03:00:00	0	0	0	0	0	0	0	0	0	0	0	0	0
22/02/2004 04:00:00	0	0	0	0	0	0	0	0	0	0	0	0	0
22/02/2004 05:00:00	0	0	0	0	0	0	0	0	0	0	0	0	0
22/02/2004 06:00:00	0	0	0	0	0	0	0	0	0	0	0	0	0
22/02/2004 07:00:00	0	0	0	0	0	0	0	0	0	0	0	0	0
22/02/2004 08:00:00	0	0	0	0	0	0	0	0	0	0	0	0	0
22/02/2004 09:00:00	0	0	0	0	0	0	0	0	0	0	0	0	0
22/02/2004 10:00:00	0	0	0	0	0	0	0	0	0	0	0	0	0
22/02/2004 11:00:00	0	0	0	0	0	0	0	0	0	0	0	0	0
22/02/2004 12:00:00	0	0	0	0	0	0	0	0	0	0	0	0	0
22/02/2004 13:00:00	0	0	0	0	0	0	0	0	0	0	0	0	0
22/02/2004 14:00:00	0	0	0	0	0	0	0	0	0	0	0	0	0
22/02/2004 15:00:00	0	0	0	0	0	0	0	0	0	0	0	0	0
22/02/2004 16:00:00	0	0	0	0	0	0	0	0	0	0	0	0	0
22/02/2004 17:00:00	0	0	0	0	0	0	0	0	0	0	0	0	0
22/02/2004 18:00:00	0	0	0	0	0	0	0	0	0	0	0	0	0
22/02/2004 19:00:00	0	0	0	0	0	0	0	0	0	0	0	0	0
22/02/2004 20:00:00	0	0	0	0	0	0	0	0	0	0	0	0	0
22/02/2004 21:00:00	0	0	0	0	0	0	0	0	0	0	0	0	0
22/02/2004 22:00:00	0	0	0	0	0	0	0	0	0	0	0	0	0
22/02/2004 23:00:00	0	0	0	0	0	0	0	0	0	0	0	0	0
23/02/2004 00:00:00	0	0	0	0	0	0	0	0	0	0	0	0	0
23/02/2004 01:00:00	0	0	0	0	0	0	0	0	0	0	0	0	0
23/02/2004 02:00:00	0	0	0	0	0	0	0	0	0	0	0	0	0
23/02/2004 03:00:00	0	0	0	0	0	0	0	0	0	0	0	0	0
23/02/2004 04:00:00	0	0	0	0	0	0	0	0	0	0	0	0	0
23/02/2004 05:00:00	0	0	0	0	0	0	0	0	0	0	0	0	0
23/02/2004 06:00:00	0	0	0	0	0	0	0	0	0	0	0	0	0
23/02/2004 07:00:00	0	0	0	0	0	0	0	0	0	0	0	0	0
23/02/2004 08:00:00	0	0	0	0	0	0	0	0	0	0	0	0	0
23/02/2004 09:00:00	0	0	0	0	0	0	0	0	0	0	0	0	0
23/02/2004 10:00:00	0	0	0	0	0	0	0	0	0	0	0	0	0
23/02/2004 11:00:00	0	0	0	0	0	0	0	0	0	0	0	0	0
23/02/2004 12:00:00	0	0	0	0	0	0	0	0	0	0	0	0	0
23/02/2004 13:00:00	0	0	0	0	0	0	0	0	0	0	0	0	0
23/02/2004 14:00:00	0	0	0	0	0	0	0	0	0	0	0	0	0
23/02/2004 15:00:00	0	0	0	0	0	0	0	0	0	0	0	0	0
23/02/2004 16:00:00	0	0	0	0	0	0	0	0	0	0	0	0	0
23/02/2004 17:00:00	0	0	0	0	0	0	0	0	0	0	0	0	0
23/02/2004 18:00:00	0	0	0	0	0	0	0	0	0	0	0	0	0
23/02/2004 19:00:00	0	0	0	0	0	0	0	0	0	0	0	0	0
23/02/2004 20:00:00	0	0	0	0	0	0	0	0	0	0	0	0	0
23/02/2004 21:00:00	0	0	0	0	0	0	0	0	0	0	0	0	0
23/02/2004 22:00:00	0	0	0	0	0	0	0	0	0	0	0	0	0
23/02/2004 23:00:00	0	0	0	0	0	0	0	0	0	0	0	0	0
24/02/2004 00:00:00	0	0	0	0	0	0	0	0	0	0	0	0	0
24/02/2004 01:00:00	0	0	0	0	0	0	0	0	0	0	0	0	0
24/02/2004 02:00:00	0	0	0	0	0	0	0	0	0	0	0	0	0
24/02/2004 03:00:00	0	0	0	0	0	0	0	0	0	0	0	0	0
24/02/2004 04:00:00	0	0	0	0	0	0	0	0	0	0	0	0	0
24/02/2004 05:00:00	0	0	0	0	0	0	0	0	0	0	0	0	0
24/02/2004 06:00:00	0	0	0	0	0	0	0	0	0	0	0	0	0
24/02/2004 07:00:00	0	0	0	0	0	0	0	0	0	0	0	0	0
24/02/2004 08:00:00	0	0	0	0	0	0	0	0	0	0	0	0	0
24/02/2004 09:00:00	0	0	0	0	0	0	0	0	0	0	0	0	0
24/02/2004 10:00:00	0	0	0	0	0	0	0	0	0	0	0	0	0
24/02/2004 11:00:00	0	0	0	0	0	0	0	0	0	0	0	0	0
24/02/2004 12:00:00	0	0	0	0	0	0	0	0	0	0	0	0	0
24/02/2004 13:00:00	0	0	0	0	0	0	0	0	0	0	0	0	0
24/02/2004 14:00:00	0	0	0	0	0	0	0	0	0	0	0	0	0
24/02/2004 15:00:00	0	0	0	0	0	0	0	0	0	0	0	0	0
24/02/2004 16:00:00	0	0	0	0	0	0	0	0	0	0	0	0	0
24/02/2004 17:00:00	0	0	0	0	0	0	0	0	0	0	0	0	0
24/02/2004 18:00:00	0	0	0	0	0	0	0	0	0	0	0	0	0
24/02/2004 19:00:00	0	0	0	0	0	0	0	0	0	0	0	0	0
24/02/2004 20:00:00	0	0	0	0	0	0	0	0	0	0	0	0	0
24/02/2004 21:00:00	0	0	0	0	0	0	0	0	0	0	0	0	0
24/02/2004 22:00:00	0	0	0	0	0	0	0	0	0	0	0	0	0
24/02/2004 23:00:00	0	0	0	0	0	0	0	0	0	0	0	0	0
25/02/2004 00:00:00	0	0	0	0	0	0	0	0	0	0	0	0	0
25/02/2004 01:00:00	0	0	0	0	0	0	0	0	0	0	0	0	0
25/02/2004 02:00:00	0	0	0	0	0	0	0	0	0	0	0	0	0
25/02/2004 03:00:00	0	0	0	0	0	0	0	0	0	0	0	0	0
25/02/2004 04:00:00	0	0	0	0	0	0	0	0	0	0	0	0	0
25/02/2004 05:00:00	0	0	0	0	0	0	0	0	0	0	0	0	0
25/02/2004 06:00:00	0	0	0	0	0	0	0	0	0	0	0	0	0
25/02/2004 07:00:00	0	0	0	0	0	0	0	0	0	0	0	0	0
25/02/2004 08:00:00	0	0	0	0	0	0	0	0	0	0	0	0	0
25/02/2004 09:00:00	0	0	0	0	0	0	0	0	0	0	0	0	0
25/02/2004 10:00:00	0	0	0	0	0	0	0	0	0	0	0	0	0
25/02/2004 11:00:00	0	0	0	0	0	0	0	0	0	0	0	0	0
25/02/2004 12:00:00	0	0	0	0	0	0	0	0	0	0	0	0	0
25/02/2004 13:00:00	0	0	0	0	0	0	0	0	0	0	0	0	0
25/02/2004 14:00:00	0	0	0	0	0	0	0	0	0	0	0	0	0
25/02/2004 15:00:00	0	0	0	0	0	0	0	0	0	0	0	0	0
25/02/2004 16:00:00	0	0	0	0	0	0	0	0	0	0	0	0	0
25/02/2004 17:00:00	0	0	0	0	0	0	0	0	0	0	0	0	0
25/02/2004 18:00:00	0	0	0	0	0	0	0	0	0	0	0	0	0
25/02/2004 19:00:00	0	0	0	0	0	0	0	0	0	0	0	0	0
25/02/2004 20:00:00	0	0	0	0	0	0	0	0	0	0	0	0	0
25/02/2004 21:00:00	0	0	0	0	0	0	0	0	0	0	0	0	0
25/02/2004 22:00:00	0	0	0	0	0	0	0	0	0	0	0	0	0
25/02/2004 23:00:00	0	0	0	0	0	0	0	0	0	0	0	0	0
26/02/2004 00:00:00	0	0	0	0	0	0	0	0	0	0	0	0	0
26/02/2004 01:00:00	0	0	0	0	0	0	0	0	0	0	0	0	0
26/02/2004 02:00:00	0	0	0	0	0	0	0	0	0	0	0	0	0
26/02/2004 03:00:00	0	0	0	0	0	0	0	0	0	0	0	0	0
26/02/2004 04:00:00	0	0	0	0	0	0	0	0	0	0	0	0	0
26/02/2004 05:00:00	0	0	0	0	0	0	0	0	0	0	0	0	0
26/02/2004 06:00:00	0	0	0	0	0	0	0	0	0	0	0	0	0
26/02/2004 07:00:00	0	0	0	0	0	0	0	0	0	0	0	0	0
26/02/2004 08:00:00	0	0	0	0	0	0	0	0	0	0	0	0	0
26/02/2004 09:00:00	0	0	0	0	0	0	0	0	0	0	0	0	0
26/02/2004 10:00:00	0	0	0	0	0	0	0	0	0	0	0	0	0
26/02/2004 11:00:00	0	0	0	0	0	0	0	0	0	0	0	0	0
26/02/2004 12:00:00	0	0	0	0	0	0	0	0	0	0	0	0	0
26/02/2004 13:00:00	0	0	0	0	0	0	0	0	0	0	0	0	0
26/02/2004 14:00:00	0	0	0	0	0	0	0	0	0	0	0	0	0
26/02/2004 15:00:00	0	0	0	0	0	0	0	0	0	0	0	0	0
26/02/2004 16:00:00	0	0	0	0	0	0	0	0	0	0	0	0	0
26/02/2004 17:00:00	0	0	0	0	0	0	0	0	0	0	0	0	0
26/02/2004 18:00:00	0	0	0	0	0	0	0	0	0	0	0	0	0
26/02/2004 19:00:00	0	0	0	0	0	0	0	0	0	0	0	0	0
26/02/2004 20:00:00	0	0	0	0	0	0	0	0	0	0	0	0	0
26/02/2004 21:00:00	0	0	0	0	0	0	0	0	0	0	0	0	0
26/02/2004 22:00:00	0	0	0	0	0	0	0	0	0	0	0	0	0
26/02/2004 23:00:00	0	0	0	0	0	0	0	0	0	0	0	0	0
27/02/2004 00:00:00	0	0	0	0	0	0	0	0	0	0	0	0	0
27/02/2004 01:00:00	0	0	0	0	0	0	0	0	0	0	0	0	0
27/02/2004 02:00:00	0	0	0	0	0	0	0	0	0	0	0	0	0
27/02/2004 03:00:00	0	0	0	0	0	0	0	0	0	0	0	0	0
27/02/2004 04:00:00	0	0	0	0	0	0	0	0	0	0	0	0	0
27/02/2004 05:00:00	0	0	0	0	0	0	0	0	0	0	0	0	0
27/02/2004 06:00:00	0	0	0	0	0	0	0	0	0	0	0	0	0
27/02/2004 07:00:00	0	0	0	0	0	0	0	0	0	0	0	0	0
27/02/2004 08:00:00	0	0	0	0	0	0	0	0	0	0	0	0	0
27/02/2004 09:00:00	0	0	0	0	0	0	0	0	0	0	0	0	0
27/02/2004 10:00:00	0	0	0	0	0	0	0	0	0	0	0	0	0
27/02/2004 11:00:00	0	0	0	0	0	0	0	0	0	0	0	0	0
27/02/2004 12:00:00	0	0	0	0	0	0	0	0	0	0	0	0	0
27/02/2004 13:00:00	0	0	0	0	0	0	0	0	0	0	0	0	0
27/02/2004 14:00:00	0	0	0	0	0	0	0	0	0	0	0	0	0
27/02/2004 15:00:00	0	0	0	0	0	0	0	0	0	0	0	0	0
27/02/2004 16:00:00	0	0	0	0	0	0	0	0	0	0	0	0	0
27/02/2004 17:00:00	0	0	0	0	0	0	0	0	0	0	0	0	0
27/02/2004 18:00:00	0	0	0	0	0	0	0	0	0	0	0	0	0
27/02/2004 19:00:00	0	0	0	0	0	0	0	0	0	0	0	0	0
27/02/2004 20:00:00	0	0	0	0	0	0	0	0	0	0	0	0	0
27/02/2004 21:00:00	0	0	0	0	0	0	0	0	0	0	0	0	0
27/02/2004 22:00:00	0	0	0	0	0	0	0	0	0	0	0	0	0
27/02/2004 23:00:00	0	0	0	0	0	0	0	0	0	0	0	0	0
28/02/2004 00:00:00	0	0	0	0	0	0	0	0	0	0	0	0	0
28/02/2004 01:00:00	0	0	0	0	0	0	0	0	0	0	0	0	0
28/02/2004 02:00:00	0	0	0	0	0	0	0	0	0	0	0	0	0
28/02/2004 03:00:00	0	0	0	0	0	0	0	0	0	0	0	0	0
28/02/2004 04:00:00	0	0	0	0	0	0	0	0	0	0	0	0	0
28/02/2004 05:00:00	0	0	0	0	0	0	0	0	0	0	0	0	0
28/02/2004 06:00:00	0	0	0	0	0	0	0	0	0	0	0	0	0
28/02/2004 07:00:00	0	0	0	0	0	0	0	0	0	0	0	0	0
28/02/2004 08:00:00	0	0	0	0	0	0	0	0	0	0	0	0	0
28/02/2004 09:00:00	0	0	0	0	0	0	0	0	0	0	0	0	0
28/02/2004 10:00:00	0	0	0	0	0	0	0	0	0	0	0	0	0
28/02/2004 11:00:00	0	0	0	0	0	0	0	0	0	0	0	0	0
28/02/2004 12:00:00	0	0	0	0	0	0	0	0	0	0	0	0	0
28/02/2004 13:00:00	0	0	0	0	0	0	0	0	0	0	0	0	0
28/02/2004 14:00:00	0	0	0	0	0	0	0	0	0	0	0	0	0
28/02/2004 15:00:00	0	0	0	0	0	0	0	0	0	0	0	0	0
28/02/2004 16:00:00	0	0	0	0	0	0	0	0	0	0	0	0	0
28/02/2004 17:00:00	0	0	0	0	0	0	0	0	0	0	0	0	0
28/02/2004 18:00:00	0	0	0	0	0	0	0	0	0	0	0	0	0
28/02/2004 19:00:00	0	0	0	0	0	0	0	0	0	0	0	0	0
28/02/2004 20:00:00	0	0	0	0	0	0	0	0	0	0	0	0	0
28/02/2004 21:00:00	0	0	0	0	0	0	0	0	0	0	0	0	0
28/02/2004 22:00:00	0	0	0	0	0	0	0	0	0	0	0	0	0
28/02/2004 23:00:00	0	0	0	0	0	0	0	0	0	0	0	0	0
29/02/2004 00:00:00	0	0	0	0	0	0	0	0	0	0	0	0	0
29/02/2004 01:00:00	0	0	0	0	0	0	0	0	0	0	0	0	0
29/02/2004 02:00:00	0	0	0	0	0	0	0	0	0	0	0	0	0
29/02/2004 03:00:00	0	0	0	0	0	0	0	0	0	0	0	0	0
29/02/2004 04:00:00	0	0	0	0	0	0	0	0	0	0	0	0	0
29/02/2004 05:00:00	0	0	0	0	0	0	0	0	0	0	0	0	0
29/02/2004 06:00:00	0	0	0	0	0	0	0	0	0	0	0	0	0
29/02/2004 07:00:00	0	0	0	0	0	0	0	0	0	0	0	0	0
29/02/2004 08:00:00	0	0	0	0	0	0	0	0	0	0	0	0	0
29/02/2004 09:00:00	0	0	0	0	0	0	0	0	0	0	0	0	0
29/02/2004 10:00:00	0	0	0	0	0	0	0	0	0	0	0	0	0
29/02/2004 11:00:00	0	0	0	0	0	0	0	0	0	0	0	0	0
29/02/2004 12:00:00	0	0	0	0	0	0	0	0	0	0	0	0	0
29/02/2004 13:00:00	0	0	0	0	0	0	0	0	0	0	0	0	0
29/02/2004 14:00:00	0	0	0	0	0	0	0	0	0	0	0	0	0
29/02/2004 15:00:00	0	0	0	0	0	0	0	0	0	0	0	0	0
29/02/2004 16:00:00	0	0	0	0	0	0	0	0	0	0	0	0	0
29/02/2004 17:00:00	0	0	0	0	0	0	0	0	0	0	0	0	0
29/02/2004 18:00:00	0	0	0	0	0	0	0	0	0	0	0	0	0
29/02/2004 19:00:00	0	0	0	0	0	0	0	0	0	0	0	0	0
29/02/2004 20:00:00	0	0	0	0	0	0	0	0	0	0	0	0	0
29/02/2004 21:00:00	0	0	0	0	0	0	0	0	0	0	0	0	0
29/02/2004 22:00:00	0	0	0	0	0	0	0	0	0	0	0	0	0
29/02/2004 23:00:00	0	0	0	0	0	0	0	0	0	0	0	0	0
01/03/2004 00:00:00	0	0	0	0	0	0	0	0	0	0	0	0	0
01/03/2004 01:00:00	0	0	0	0	0	0	0	0	0	0	0	0	0
01/03/2004 02:00:00	0	0	0	0	0	0	0	0	0	0	0	0	0
01/03/2004 03:00:00	0	0	0	0	0	0	0	0	0	0	0	0	0
01/03/2004 04:00:00	0	0	0	0	0	0	0	0	0	0	0	0	0
01/03/2004 05:00:00	0	0	0	0	0	0	0	0	0	0	0	0	0
01/03/2004 06:00:00	0	0	0	0	0	0	0	0	0	0	0	0	0
01/03/2004 07:00:00	0	0	0	0	0	0	0	0	0	0	0	0	0
01/03/2004 08:00:00	0	0	0	0	0	0	0	0	0	0	0	0	0
01/03/2004 09:00:00	0	0	0	0	0	0	0	0	0	0	0	0	0
01/03/2004 10:00:00	0	0	0	0	0	0	0	0	0	0	0	0	0
01/03/2004 11:00:00	0	0	0	0	0	0	0	0	0	0	0	0	0
01/03/2004 12:00:00	0	0	0	0	0	0	0	0	0	0	0	0	0
01/03/2004 13:00:00	0	0	0	0	0	0	0	0	0	0	0	0	0
01/03/2004 14:00:00	0	0	0	0	0	0	0	0	0	0	0	0	0
01/03/2004 15:00:00	0	0	0	0	0	0	0	0	0	0	0	0	0
01/03/2004 16:00:00	0	0	0	0	0	0	0	0	0	0	0	0	0
01/03/2004 17:00:00	0	0	0	0	0	0	0	0	0	0	0	0	0
01/03/2004 18:00:00	0	0	0	0	0	0	0	0	0	0	0	0	0
01/03/2004 19:00:00	0	0	0	0	0	0	0	0	0	0	0	0	0
01/03/2004 20:00:00	0	0	0	0	0	0	0	0	0	0	0	0	0
01/03/2004 21:00:00	0	0	0	0	0	0	0	0	0	0	0	0	0
01/03/2004 22:00:00	0	0	0	0	0	0	0	0	0	0	0	0	0
01/03/2004 23:00:00	0	0	0	0	0	0	0	0	0	0	0	0	0
02/03/2004 00:00:00	0	0	0	0	0	0	0	0	0	0	0	0	0
02/03/2004 01:00:00	0	0	0	0	0	0	0	0	0	0	0	0	0
02/03/2004 02:00:00	0	0	0	0	0	0	0	0	0	0	0	0	0
02/03/2004 03:00:00	0	0	0	0	0	0	0	0	0	0	0	0	0
02/03/2004 04:00:00	0	0	0	0	0	0	0	0	0	0	0	0	0
02/03/2004 05:00:00	0	0	0	0	0	0	0	0	0	0	0	0	0
02/03/2004 06:00:00	0	0	0	0	0	0	0	0	0	0	0	0	0
02/03/2004 07:00:00	0	0	0	0	0	0	0	0	0	0	0	0	0
02/03/2004 08:00:00	0	0	0	0	0	0	0	0	0	0	0	0	0
02/03/2004 09:00:00	0	0	0	0	0	0	0	0	0	0	0	0	0
02/03/2004 10:00:00	0	0	0	0	0	0	0	0	0	0	0	0	0
02/03/2004 11:00:00	0	0	0	0	0	0	0	0	0	0	0	0	0
02/03/2004 12:00:00	0	0	0	0	0	0	0	0	0	0	0	0	0
02/03/2004 13:00:00	0	0	0	0	0	0	0	0	0	0	0	0	0
02/03/2004 14:00:00	0	0	0	0	0	0	0	0	0	0	0	0	0
02/03/2004 15:00:00	0	0	0	0	0	0	0	0	0	0	0	0	0
02/03/2004 16:00:00	0	0	0	0	0	0	0	0	0	0	0	0	0
02/03/2004 17:00:00	0	0	0	0	0	0	0	0	0	0	0	0	0
02/03/2004 18:00:00	0	0	0	0	0	0	0	0	0	0	0	0	0
02/03/2004 19:00:00	0	0	0	0	0	0	0	0	0	0	0	0	0
02/03/2004 20:00:00	0	0	0	0	0	0	0	0	0	0	0	0	0
02/03/2004 21:00:00	0	0	0	0	0	0	0	0	0	0	0	0	0
02/03/2004 22:00:00	0	0	0	0	0	0	0	0	0	0	0	0	0
02/03/2004 23:00:00	0	0	0	0	0	0	0	0	0	0	0	0	0
03/03/2004 00:00:00	0	0	0	0	0	0	0	0	0	0	0	0	0
03/03/2004 01:00:00	0	0	0	0	0	0	0	0	0	0	0	0	0
03/03/2004 02:00:00	0	0	0	0	0	0	0	0	0	0	0	0	0
03/03/2004 03:00:00	0	0	0	0	0	0	0	0	0	0	0	0	0
03/03/2004 04:00:00	0	0	0	0	0	0	0	0	0	0	0	0	0
03/03/2004 05:00:00	0	0	0	0	0	0	0	0	0	0	0	0	0
03/03/2004 06:00:00	0	0	0	0	0	0	0	0	0	0	0	0	0
03/03/2004 07:00:00	0	0	0	0	0	0	0	0	0	0	0	0	0
03/03/2004 08:00:00	0	0	0	0	0	0	0	0	0	0	0	0	0
03/03/2004 09:00:00	0	0	0	0	0	0	0	0	0	0	0	0	0
03/03/2004 10:00:00	0	0	0	0	0	0	0	0	0	0	0	0	0
03/03/2004 11:00:00	0	0	0	0	0	0	0	0	0	0	0	0	0
03/03/2004 12:00:00	0	0	0	0	0	0	0	0	0	0	0	0	0
03/03/2004 13:00:00	0	0	0	0	0	0	0	0	0	0	0	0	0
03/03/2004 14:00:00	0	0	0	0	0	0	0	0	0	0	0	0	0
03/03/2004 15:00:00	0	0	0	0	0	0	0	0	0	0	0	0	0
03/03/2004 16:00:00	0	0	0	0	0	0	0	0	0	0	0	0	0
03/03/2004 17:00:00	0	0	0	0	0	0	0	0	0	0	0	0	0
03/03/2004 18:00:00	0	0	0	0	0	0	0	0	0	0	0	0	0
03/03/2004 19:00:00	0	0	0	0	0	0	0	0	0	0	0	0	0
03/03/2004 20:00:00	0	0	0	0	0	0	0	0	0	0	0	0	0
03/03/2004 21:00:00	0	0	0	0	0	0	0	0	0	0	0	0	0
03/03/2004 22:00:00	0	0	0	0	0	0	0	0	0	0	0	0	0
03/03/2004 23:00:00	0	0	0	0	0	0	0	0	0	0	0	0	0
04/03/2004 00:00:00	0	0	0	0	0	0	0	0	0	0	0	0	0
04/03/2004 01:00:00	0	0	0	0	0	0	0	0	0	0	0	0	0
04/03/2004 02:00:00	0	0	0	0	0	0	0	0	0	0	0	0	0
04/03/2004 03:00:00	0	0	0	0	0	0	0	0	0	0	0	0	0
04/03/2004 04:00:00	0	0	0	0	0	0	0	0	0	0	0	0	0
04/03/2004 05:00:00	0	0	0	0	0	0	0	0	0	0	0	0	0
04/03/2004 06:00:00	0	0	0	0	0	0	0	0	0	0	0	0	0
04/03/2004 07:00:00	0	0	0	0	0	0	0	0	0	0	0	0	0
04/03/2004 08:00:00	0	0	0	0	0	0	0	0	0	0	0	0	0
04/03/2004 09:00:00	0	0	0	0	0	0	0	0	0	0	0	0	0
04/03/2004 10:00:00	0	0	0	0	0	0	0	0	0	0	0	0	0
04/03/2004 11:00:00	0	0	0	0	0	0	0	0	0	0	0	0	0
04/03/2004 12:00:00	0	0	0	0	0	0	0	0	0	0	0	0	0
04/03/2004 13:00:00	0	0	0	0	0	0	0	0	0	0	0	0	0
04/03/2004 14:00:00	0	0	0	0	0	0	0	0	0	0	0	0	0
04/03/2004 15:00:00	0	0	0	0	0	0	0	0	0	0	0	0	0
04/03/2004 16:00:00	0	0	0	0	0	0	0	0	0	0	0	0	0
04/03/2004 17:00:00	0	0	0	0	0	0	0	0	0	0	0	0	0
04/03/2004 18:00:00	0	0	0	0	0	0	0	0	0	0	0	0	0
04/03/2004 19:00:00	0	0	0	0	0	0	0	0	0	0	0	0	0
04/03/2004 20:00:00	0	0	0	0	0	0	0	0	0	0	0	0	0
04/03/2004 21:00:00	0	0	0	0	0	0	0	0	0	0	0	0	0
04/03/2004 22:00:00	0	0	0	0	0	0	0	0	0	0	0	0	0
04/03/2004 23:00:00	0	0	0	0	0	0	0	0	0	0	0	0	0
05/03/2004 00:00:00	0	0	0	0	0	0	0	0	0	0	0	0	0
05/03/2004 01:00:00	0	0	0	0	0	0	0	0	0	0	0	0	0
05/03/2004 02:00:00	0	0	0	0	0	0	0	0	0	0	0	0	0
05/03/2004 03:00:00	0	0	0	0	0	0	0	0	0	0	0	0	0
05/03/2004 04:00:00	0	0	0	0	0	0	0	0	0	0	0	0	0
05/03/2004 05:00:00	0	0	0	0	0	0	0	0	0	0	0	0	0
05/03/2004 06:00:00	0	0	0	0	0	0	0	0	0	0	0	0	0
05/03/2004 07:00:00	0	0	0	0	0	0	0	0	0	0	0	0	0
05/03/2004 08:00:00	0	0	0	0	0	0	0	0	0	0	0	0	0
05/03/2004 09:00:00	0	0	0	0	0	0	0	0	0	0	0	0	0
05/03/2004 10:00:00	0	0	0	0	0	0	0	0	0	0	0	0	0
05/03/2004 11:00:00	0	0	0	0	0	0	0	0	0	0	0	0	0
05/03/2004 12:00:00	0	0	0	0	0	0	0	0	0	0	0	0	0
05/03/2004 13:00:00	0	0	0	0	0	0	0	0	0	0	0	0	0
05/03/2004 14:00:00	0	0	0	0	0	0	0	0	0	0	0	0	0
05/03/2004 15:00:00	0	0	0	0	0	0	0	0	0	0	0	0	0
05/03/2004 16:00:00	0	0	0	0	0	0	0	0	0	0	0	0	0
05/03/2004 17:00:00	0	0	0	0	0	0	0	0	0	0	0	0	0
05/03/2004 18:00:00	0	0	0	0	0	0	0	0	0	0	0	0	0
05/03/2004 19:00:00	0	0	0	0	0	0	0	0	0	0	0	0	0
05/03/2004 20:00:00	0	0	0	0	0	0	0	0	0	0	0	0	0
05/03/2004 21:00:00	0	0	0	0	0	0	0	0	0	0	0	0	0
05/03/2004 22:00:00	0	0	0	0	0	0	0	0	0	0	0	0	0
05/03/2004 23:00:00	0	0	0	0	0	0	0	0	0	0	0	0	0
06/03/2004 00:00:00	0	0	0	0	0	0	0	0	0	0	0	0	0
06/03/2004 01:00:00	0	0	0	0	0	0	0	0	0	0	0	0	0
06/03/2004 02:00:00	0	0	0	0	0	0	0	0	0	0	0	0	0
06/03/2004 03:00:00	0	0	0	0	0	0	0	0	0	0	0	0	0
06/03/2004 04:00:00	0	0	0	0	0	0	0	0	0	0	0	0	0
06/03/2004 05:00:00	0	0	0	0	0	0	0	0	0	0	0	0	0
06/03/2004 06:00:00	0	0	0	0	0	0	0	0	0	0	0	0	0
06/03/2004 07:00:00	0	0	0	0	0	0	0	0	0	0	0	0	0
06/03/2004 08:00:00	0	0	0	0	0	0	0	0	0	0	0	0	0
06/03/2004 09:00:00	0	0	0	0	0	0	0	0	0	0	0	0	0
06/03/2004 10:00:00	0	0	0	0	0	0	0	0	0	0	0	0	0
06/03/2004 11:00:00	0	0	0	0	0	0	0	0	0	0	0	0	0
06/03/2004 12:00:00	0	0	0	0	0	0	0	0	0	0	0	0	0
06/03/2004 13:00:00	0	0	0	0	0	0	0	0	0	0	0	0	0
06/03/2004 14:00:00	0	0	0	0	0	0	0	0	0	0	0	0	0
06/03/2004 15:00:00	0	0	0	0	0	0	0	0	0	0	0	0	0
06/03/2004 16:00:00	0	0	0	0	0	0	0	0	0	0	0	0	0
06/03/2004 17:00:00	0	0	0	0	0	0	0	0	0	0	0	0	0
06/03/2004 18:00:00	0	0	0	0	0	0	0	0	0	0	0	0	0
06/03/2004 19:00:00	0	0	0	0	0	0	0	0	0	0	0	0	0
06/03/2004 20:00:00	0	0	0	0	0	0	0	0	0	0	0	0	0
06/03/2004 21:00:00	0	0	0	0	0	0	0	0	0	0	0	0	0
06/03/2004 22:00:00	0	0	0	0	0	0	0	0	0	0	0	0	0
06/03/2004 23:00:00	0	0	0	0	0	0	0	0	0	0	0	0	0
07/03/2004 00:00:00	0	0	0	0	0	0	0	0	0	0	0	0	0
07/03/2004 01:00:00	0	0	0	0	0	0	0	0	0	0	0	0	0
07/03/2004 02:00:00	0	0	0	0	0	0	0	0	0	0	0	0	0
07/03/2004 03:00:00	0	0	0	0	0	0	0	0	0	0	0	0	0
07/03/2004 04:00:00	0	0	0	0	0	0	0	0	0	0	0	0	0
07/03/2004 05:00:00	0	0	0	0	0	0	0	0	0	0	0	0	0
07/03/2004 06:00:00	0	0	0	0	0	0	0	0	0	0	0	0	0
07/03/2004 07:00:00	0	0	0	0	0	0	0	0	0	0	0	0	0
07/03/2004 08:00:00	0	0	0	0	0	0	0	0	0	0	0	0	0
07/03/2004 09:00:00	0	0	0	0	0	0	0	0	0	0	0	0	0
07/03/2004 10:00:00	0	0	0	0	0	0	0	0	0	0	0	0	0
07/03/2004 11:00:00	0	0	0	0	0	0	0	0	0	0	0	0	0
07/03/2004 12:00:00	0	0	0	0	0	0	0	0	0	0	0	0	0
07/03/2004 13:00:00	0	0	0	0	0	0	0	0	0	0	0	0	0
07/03/2004 14:00:00	0	0	0	0	0	0	0	0	0	0	0	0	0
07/03/2004 15:00:00	0	0	0	0	0	0	0	0	0	0	0	0	0
07/03/2004 16:00:00	0	0	0	0	0	0	0	0	0	0	0	0	0
07/03/2004 17:00:00	0	0	0	0	0	0	0	0	0	0	0	0	0
07/03/2004 18:00:00	0	0	0	0	0	0	0	0	0	0	0	0	0
07/03/2004 19:00:00	0	0	0	0	0	0	0	0	0	0	0	0	0
07/03/2004 20:00:00	0	0	0	0	0	0	0	0	0	0	0	0	0
07/03/2004 21:00:00	0	0	0	0	0	0	0	0	0	0	0	0	0
07/03/2004 22:00:00	0	0	0	0	0	0	0	0	0	0	0	0	0
07/03/2004 23:00:00	0	0	0	0	0	0	0	0	0	0	0	0	0
08/03/2004 00:00:00	0	0	0	0	0	0	0	0	0	0	0	0	0
08/03/2004 01:00:00	0	0	0	0	0	0	0	0	0	0	0	0	0
08/03/2004 02:00:00	0	0	0	0	0	0	0	0	0	0	0	0	0
08/03/2004 03:00:00	0	0	0	0	0	0	0	0	0	0	0	0	0
08/03/2004 04:00:00	0	0	0	0	0	0	0	0	0	0	0	0	0
08/03/2004 05:00:00	0	0	0	0	0	0	0	0	0	0	0	0	0
08/03/2004 06:00:00	0	0	0	0	0	0	0	0	0	0	0	0	0
08/03/2004 07:00:00	0	0	0	0	0	0	0	0	0	0	0	0	0
08/03/2004 08:00:00	0	0	0	0	0	0	0	0	0	0	0	0	0
08/03/2004 09:00:00	0	0	0	0	0	0	0	0	0	0	0	0	0
08/03/2004 10:00:00	0	0	0	0	0	0	0	0	0	0	0	0	0
08/03/2004 11:00:00	0	0	0	0	0	0	0	0	0	0	0	0	0
08/03/2004 12:00:00	0	0	0	0	0	0	0	0	0	0	0	0	0
08/03/2004 13:00:00	0	0	0	0	0	0	0	0	0	0	0	0	0
08/03/2004 14:00:00	0	0	0	0	0	0	0	0	0	0	0	0	0
08/03/2004 15:00:00	0	0	0	0	0	0	0	0	0	0	0	0	0
08/03/2004 16:00:00	0	0	0	0	0	0	0	0	0	0	0	0	0
08/03/2004 17:00:00	0	0	0	0	0	0	0	0	0	0	0	0	0
08/03/2004 18:00:00	0	0	0	0	0	0	0	0	0	0	0	0	0
08/03/2004 19:00:00	0	0	0	0	0	0	0	0	0	0	0	0	0
08/03/2004 20:00:00	0	0	0	0	0	0	0	0	0	0	0	0	0
08/03/2004 21:00:00	0	0	0	0	0	0	0	0	0	0	0	0	0
08/03/2004 22:00:00	0	0	0	0	0	0	0	0	0	0	0	0	0
08/03/2004 23:00:00	0	0	0	0	0	0	0	0	0	0	0	0	0
09/03/2004 00:00:00	0	0	0	0	0	0	0	0	0	0	0	0	0
09/03/2004 01:00:00	0	0	0	0	0	0	0	0	0	0	0	0	0
09/03/2004 02:00:00	0	0	0	0	0	0	0	0	0	0	0	0	0
09/03/2004 03:00:00	0	0	0	0	0	0	0	0	0	0	0	0	0
09/03/2004 04:00:00	0	0	0	0	0	0	0	0	0	0	0	0	0
09/03/2004 05:00:00	0	0	0	0	0	0	0	0	0	0	0	0	0
09/03/2004 06:00:00	0	0	0	0	0	0	0	0	0	0	0	0	0
09/03/2004 07:00:00	0	0	0	0	0	0	0	0	0	0	0	0	0
09/03/2004 08:00:00	0	0	0	0	0	0	0	0	0	0	0	0	0
09/03/2004 09:00:00	0	0	0	0	0	0	0	0	0	0	0	0	0
09/03/2004 10:00:00	0	0	0	0	0	0	0	0	0	0	0	0	0
09/03/2004 11:00:00	0	0	0	0	0	0	0	0	0	0	0	0	0
09/03/2004 12:00:00	0	0	0	0	0	0	0	0	0	0	0	0	0
09/03/2004 13:00:00	0	0	0	0	0	0	0	0	0	0	0	0	0
09/03/2004 14:00:00	0	0	0	0	0	0	0	0	0	0	0	0	0
09/03/2004 15:00:00	0	0	0	0	0	0	0	0	0	0	0	0	0
09/03/2004 16:00:00	0	0	0	0	0	0	0	0	0	0	0	0	0
09/03/2004 17:00:00	0	0	0	0	0	0	0	0	0	0	0	0	0
09/03/2004 18:00:00	0	0	0	0	0	0	0	0	0	0	0	0	0
09/03/2004 19:00:00	0	0	0	0	0	0	0	0	0	0	0	0	0
09/03/2004 20:00:00	0	0	0	0	0	0	0	0	0	0	0	0	0
09/03/2004 21:00:00	0	0	0	0	0	0	0	0	0	0	0	0	0
09/03/2004 22:00:00	0	0	0	0	0	0	0	0	0	0	0	0	0
09/03/2004 23:00:00	0	0	0	0	0	0	0	0	0	0	0	0	0
10/03/2004 00:00:00	0	0	0	0	0	0	0	0	0	0	0	0	0
10/03/2004 01:00:00	0	0	0	0	0	0	0	0	0	0	0	0	0
10/03/2004 02:00:00	0	0	0	0	0	0	0	0	0	0	0	0	0
10/03/2004 03:00:00	0	0	0	0	0	0	0	0	0	0	0	0	0
10/03/2004 04:00:00	0	0	0	0	0	0	0	0	0	0	0	0	0
10/03/2004 05:00:00	0	0	0	0	0	0	0	0	0	0	0	0	0
10/03/2004 06:00:00	0	0	0	0	0	0	0	0	0	0	0	0	0
10/03/2004 07:00:00	0	0	0	0	0	0	0	0	0	0	0	0	0
10/03/2004 08:00:00	0	0	0	0	0	0	0	0	0	0	0	0	0
10/03/2004 09:00:00	0	0	0	0	0	0	0	0	0	0	0	0	0
10/03/2004 10:00:00	0	0	0	0	0	0	0	0	0	0	0	0	0
10/03/2004 11:00:00	0	0	0	0	0	0	0	0	0	0	0	0	0
10/03/2004 12:00:00	0	0	0	0	0	0	0	0	0	0	0	0	0
10/03/2004 13:00:00	0	0	0	0	0	0	0	0	0	0	0	0	0
10/03/2004 14:00:00	0	0	0	0	0	0	0	0	0	0	0	0	0
10/03/2004 15:00:00	0	0	0	0	0	0	0	0	0	0	0	0	0
10/03/2004 16:00:00	0	0	0	0	0	0	0	0	0	0	0	0	0
10/03/2004 17:00:00	0	0	0	0	0	0	0	0	0	0	0	0	0
10/03/2004 18:00:00	0	0	0	0	0	0	0	0	0	0	0	0	0
10/03/2004 19:00:00	0	0	0	0	0	0	0	0	0	0	0	0	0
10/03/2004 20:00:00	0	0	0	0	0	0	0	0	0	0	0	0	0
10/03/2004 21:00:00	0	0	0	0	0	0	0	0	0	0	0	0	0
10/03/2004 22:00:00	0	0	0	0	0	0	0	0	0	0	0	0	0
10/03/2004 23:00:00	0	0	0	0	0	0	0	0	0	0	0	0	0
11/03/2004 00:00:00	0	0	0	0	0	0	0	0	0	0	0	0	0
11/03/2004 01:00:00	0	0	0	0	0	0	0	0	0	0	0	0	0
11/03/2004 02:00:00	0	0	0	0	0	0	0	0	0	0	0	0	0
11/03/2004 03:00:00	0	0	0	0	0	0	0	0	0	0	0	0	0
11/03/2004 04:00:00	0	0	0	0	0	0	0	0	0	0	0	0	0
11/03/2004 05:00:00	0	0	0	0	0	0	0	0	0	0	0	0	0
11/03/2004 06:00:00	0	0	0	0	0	0	0	0	0	0	0	0	0
11/03/2004 07:00:00	0	0	0	0	0	0	0	0	0	0	0	0	0
11/03/2004 08:00:00	0	0	0	0	0	0	0	0	0	0	0	0	0
11/03/2004 09:00:00	0	0	0	0	0	0	0	0	0	0	0	0	0
11/03/2004 10:00:00	0	0	0	0	0	0	0	0	0	0	0	0	0
11/03/2004 11:00:00	0	0	0	0	0	0	0	0	0	0	0	0	0
11/03/2004 12:00:00	0	0	0	0	0	0	0	0	0	0	0	0	0
11/03/2004 13:00:00	0	0	0	0	0	0	0	0	0	0	0	0	0
11/03/2004 14:00:00	0	0	0	0	0	0	0	0	0	0	0	0	0
11/03/2004 15:00:00	0	0	0	0	0	0	0	0	0	0	0	0	0
11/03/2004 16:00:00	0	0	0	0	0	0	0	0	0	0	0	0	0
11/03/2004 17:00:00	0	0	0	0	0	0	0	0	0	0	0	0	0
11/03/2004 18:00:00	0	0	0	0	0	0	0	0	0	0	0	0	0
11/03/2004 19:00:00	0	0	0	0	0	0	0	0	0	0	0	0	0
11/03/2004 20:00:00	0	0	0	0	0	0	0	0	0	0	0	0	0
11/03/2004 21:00:00	0	0	0	0	0	0	0	0	0	0	0	0	0
11/03/2004 22:00:00	0	0	0	0	0	0	0	0	0	0	0	0	0
11/03/2004 23:00:00	0	0	0	0	0	0	0	0	0	0	0	0	0
12/03/2004 00:00:00	0	0	0	0	0	0	0	0	0	0	0	0	0
12/03/2004 01:00:00	0	0	0	0	0	0	0	0	0	0	0	0	0
12/03/2004 02:00:00	0	0	0	0	0	0	0	0	0	0	0	0	0
12/03/2004 03:00:00	0	0	0	0	0	0	0	0	0	0	0	0	0
12/03/2004 04:00:00	0	0	0	0	0	0	0	0	0	0	0	0	0
12/03/2004 05:00:00	0	0	0	0	0	0	0	0	0	0	0	0	0
12/03/2004 06:00:00	0	0	0	0	0	0	0	0	0	0	0	0	0
12/03/2004 07:00:00	0	0	0	0	0	0	0	0	0	0	0	0	0
12/03/2004 08:00:00	0	0	0	0	0	0	0	0	0	0	0	0	0
12/03/2004 09:00:00	0	0	0	0	0	0	0	0	0	0	0	0	0
12/03/2004 10:00:00	0	0	0	0	0	0	0	0	0	0	0	0	0
12/03/2004 11:00:00	0	0	0	0	0	0	0	0	0	0	0	0	0
12/03/2004 12:00:00	0	0	0	0	0	0	0	0	0	0	0	0	0
12/03/2004 13:00:00	0	0	0	0	0	0	0	0	0	0	0	0	0
12/03/2004 14:00:00	0	0	0	0	0	0	0	0	0	0	0	0	0
12/03/2004 15:00:00	0	0	0	0	0	0	0	0	0	0	0	0	0
12/03/2004 16:00:00	0	0	0	0	0	0	0	0	0	0	0	0	0
12/03/2004 17:00:00	0	0	0	0	0	0	0	0	0	0	0	0	0
12/03/2004 18:00:00	0	0	0	0	0	0	0	0	0	0	0	0	0
12/03/2004 19:00:00	0	0	0	0	0	0	0	0	0	0	0	0	0
12/03/2004 20:00:00	0	0	0	0	0	0	0	0	0	0	0	0	0
12/03/2004 21:00:00	0	0	0	0	0	0	0	0	0	0	0	0	0
12/03/2004 22:00:00	0	0	0	0	0	0	0	0	0	0	0	0	0
12/03/2004 23:00:00	0	0	0	0	0	0	0	0	0	0	0	0	0
13/03/2004 00:00:00	0	0	0	0	0	0	0	0	0	0	0	0	0
13/03/2004 01:00:00	0	0	0	0	0	0	0	0	0	0	0	0	0
13/03/2004 02:00:00	0	0	0	0	0	0	0	0	0	0	0	0	0
13/03/2004 03:00:00	0	0	0	0	0	0	0	0	0	0	0	0	0
13/03/2004 04:00:00	0	0	0	0	0	0	0	0	0	0	0	0	0
13/03/2004 05:00:00	0	0	0	0	0	0	0	0	0	0	0	0	0
13/03/2004 06:00:00	0	0	0	0	0	0	0	0	0	0	0	0	0
13/03/2004 07:00:00	0	0	0	0	0	0	0	0	0	0	0	0	0
13/03/2004 08:00:00	0	0	0	0	0	0	0	0	0	0	0	0	0
13/03/2004 09:00:00	0	0	0	0	0	0	0	0	0	0	0	0	0
13/03/2004 10:00:00	0	0	0	0	0	0	0	0	0	0	0	0	0
13/03/2004 11:00:00	0	0	0	0	0	0	0	0	0	0	0	0	0
13/03/2004 12:00:00	0	0	0	0	0	0	0	0	0	0	0	0	0
13/03/2004 13:00:00	0	0	0	0	0	0	0	0	0	0	0	0	0
13/03/2004 14:00:00	0	0	0	0	0	0	0	0	0	0	0	0	0
13/03/2004 15:00:00	0	0	0	0	0	0	0	0	0	0	0	0	0
13/03/2004 16:00:00	0	0	0	0	0	0	0	0	0	0	0	0	0
13/03/2004 17:00:00	0	0	0	0	0	0	0	0	0	0	0	0	0
13/03/2004 18:00:00	0	0	0	0	0	0	0	0	0	0	0	0	0
13/03/2004 19:00:00	0	0	0	0	0	0	0	0	0	0	0	0	0
13/03/2004 20:00:00	0	0	0	0	0	0	0	0	0	0	0	0	0
13/03/2004 21:00:00	0	0	0	0	0	0	0	0	0	0	0	0	0
13/03/2004 22:00:00	0	0	0	0	0	0	0	0	0	0	0	0	0
13/03/2004 23:00:00	0	0	0	0	0	0	0	0	0	0	0	0	0
14/03/2004 00:00:00	0	0	0	0	0	0	0	0	0	0	0	0	0
14/03/2004 01:00:00	0	0	0	0	0	0	0	0	0	0	0	0	0
14/03/2004 02:00:00	0	0	0	0	0	0	0	0	0	0	0	0	0
14/03/2004 03:00:00	0	0	0	0	0	0	0	0	0	0	0	0	0
14/03/2004 04:00:00	0	0	0	0	0	0	0	0	0	0	0	0	0
14/03/2004 05:00:00	0	0	0	0	0	0	0	0	0	0	0	0	0
14/03/2004 06:00:00	0	0	0	0	0	0	0	0	0	0	0	0	0
14/03/2004 07:00:00	0	0	0	0	0	0	0	0	0	0	0	0	0
14/03/2004 08:00:00	0	0	0	0	0	0	0	0	0	0	0	0	0
14/03/2004 09:00:00	0	0	0	0	0	0	0	0	0	0	0	0	0
14/03/2004 10:00:00	0	0	0	0	0	0	0	0	0	0	0	0	0
14/03/2004 11:00:00	0	0	0	0	0	0	0	0	0	0	0	0	0
14/03/2004 12:00:00	0	0	0	0	0	0	0	0	0	0	0	0	0
14/03/2004 13:00:00	0	0	0	0	0	0	0	0	0	0	0	0	0
14/03/2004 14:00:00	0	0	0	0	0	0	0	0	0	0	0	0	0
14/03/2004 15:00:00	0	0	0	0	0	0	0	0	0	0	0	0	0
14/03/2004 16:00:00	0	0	0	0	0	0	0	0	0	0	0	0	0
14/03/2004 17:00:00	0	0	0	0	0	0	0	0	0	0	0	0	0
14/03/2004 18:00:00	0	0	0	0	0	0	0	0	0	0	0	0	0
14/03/2004 19:00:00	0	0	0	0	0	0	0	0	0	0	0	0	0
14/03/2004 20:00:00	0	0	0	0	0	0	0	0	0	0	0	0	0
14/03/2004 21:00:00	0	0	0	0	0	0	0	0	0	0	0	0	0
14/03/2004 22:00:00	0	0	0	0	0	0	0	0	0	0	0	0	0
14/03/2004 23:00:00	0	0	0	0	0	0	0	0	0	0	0	0	0
15/03/2004 00:00:00	0	0	0	0	0	0	0	0	0	0	0	0	0
15/03/2004 01:00:00	0	0	0	0	0	0	0	0	0	0	0	0	0
15/03/2004 02:00:00	0	0	0	0	0	0	0	0	0	0	0	0	0
15/03/2004 03:00:00	0	0	0	0	0	0	0	0	0	0	0	0	0
15/03/2004 04:00:00	0	0	0	0	0	0	0	0	0	0	0	0	0
15/03/2004 05:00:00	0	0	0	0	0	0	0	0	0	0	0	0	0
15/03/2004 06:00:00	0	0	0	0	0	0	0	0	0	0	0	0	0
15/03/2004 07:00:00	0	0	0	0	0	0	0	0	0	0	0	0	0
15/03/2004 08:00:00	0	0	0	0	0	0	0	0	0	0	0	0	0
15/03/2004 09:00:00	0	0	0	0	0	0	0	0	0	0	0	0	0
15/03/2004 10:00:00	0	0	0	0	0	0	0	0	0	0	0	0	0
15/03/2004 11:00:00	0	0	0	0	0	0	0	0	0	0	0	0	0
15/03/2004 12:00:00	0	0	0	0	0	0	0	0	0	0	0	0	0
15/03/2004 13:00:00	0	0	0	0	0	0	0	0	0	0	0	0	0
15/03/2004 14:00:00	0	0	0	0	0	0	0	0	0	0	0	0	0
15/03/2004 15:00:00	0	0	0	0	0	0	0	0	0	0	0	0	0
15/03/2004 16:00:00	0	0	0	0	0	0	0	0	0	0	0	0	0
15/03/2004 17:00:00	0	0	0	0	0	0	0	0	0	0	0	0	0
15/03/2004 18:00:00	0	0	0	0	0	0	0	0	0	0	0	0	0
15/03/2004 19:00:00	0	0	0	0	0	0	0	0	0	0	0	0	0
15/03/2004 20:00:00	0	0	0	0	0	0	0	0	0	0	0	0	0
15/03/2004 21:00:00	0	0	0	0	0	0	0	0	0	0	0	0	0
15/03/2004 22:00:00	0	0	0	0	0	0	0	0	0	0	0	0	0
15/03/2004 23:00:00	0	0	0	0	0	0	0	0	0	0	0	0	0
16/03/2004 00:00:00	0	0	0	0	0	0	0	0	0	0	0	0	0
16/03/2004 01:00:00	0	0	0	0	0	0	0	0	0	0	0	0	0
16/03/2004 02:00:00	0	0	0	0	0	0	0	0	0	0	0	0	0
16/03/2004 03:00:00	0	0	0	0	0	0	0	0	0	0	0	0	0
16/03/2004 04:00:00	0	0	0	0	0	0	0	0	0	0	0	0	0
16/03/2004 05:00:00	0	0	0	0	0	0	0	0	0	0	0	0	0
16/03/2004 06:00:00	0	0	0	0	0	0	0	0	0	0	0	0	0
16/03/2004 07:00:00	0	0	0	0	0	0	0	0	0	0	0	0	0
16/03/2004 08:00:00	0	0	0	0	0	0	0	0	0	0	0	0	0
16/03/2004 09:00:00	0	0	0	0	0	0	0	0	0	0	0	0	0
16/03/2004 10:00:00	0	0	0	0	0	0	0	0	0	0	0	0	0
16/03/2004 11:00:00	0	0	0	0	0	0	0	0	0	0	0	0	0
16/03/2004 12:00:00	0	0	0	0	0	0	0	0	0	0	0	0	0
16/03/2004 13:00:00	0	0	0	0	0	0	0	0	0	0	0	0	0
16/03/2004 14:00:00	0	0	0	0	0	0	0	0	0	0	0	0	0
16/03/2004 15:00:00	0	0	0	0	0	0	0	0	0	0	0	0	0
16/03/2004 16:00:00	0	0	0	0	0	0	0	0	0	0	0	0	0
16/03/2004 17:00:00	0	0	0	0	0	0	0	0	0	0	0	0	0
16/03/2004 18:00:00	0	0	0	0	0	0	0	0	0	0	0	0	0
16/03/2004 19:00:00	0	0	0	0	0	0	0	0	0	0	0	0	0
16/03/2004 20:00:00	0	0	0	0	0	0	0	0	0	0	0	0	0
16/03/2004 21:00:00	0	0	0	0	0	0	0	0	0	0	0	0	0
16/03/2004 22:00:00	0	0	0	0	0	0	0	0	0	0	0	0	0
16/03/2004 23:00:00	0	0	0	0	0	0	0	0	0	0	0	0	0
17/03/2004 00:00:00	0	0	0	0	0	0	0	0	0	0	0	0	0
17/03/2004 01:00:00	0	0	0	0	0	0	0	0	0	0	0	0	0
17/03/2004 02:00:00	0	0	0	0	0	0	0	0	0	0	0	0	0
17/03/2004 03:00:00	0	0	0	0	0	0	0	0	0	0	0	0	0
17/03/2004 04:00:00	0	0	0	0	0	0	0	0	0	0	0	0	0
17/03/2004 05:00:00	0	0	0	0	0	0	0	0	0	0	0	0	0
17/03/2004 06:00:00	0	0	0	0	0	0	0	0	0	0	0	0	0
17/03/2004 07:00:00	0	0	0	0	0	0	0	0	0	0	0	0	0
17/03/2004 08:00:00	0	0	0	0	0	0	0	0	0	0	0	0	0
17/03/2004 09:00:00	0	0	0	0	0	0	0	0	0	0	0	0	0
17/03/2004 10:00:00	0	0	0	0	0	0	0	0	0	0	0	0	0
17/03/2004 11:00:00	0	0	0	0	0	0	0	0	0	0	0	0	0
17/03/2004 12:00:00	0	0	0	0	0	0	0	0	0	0	0	0	0
17/03/2004 13:00:00	0	0	0	0	0	0	0	0	0	0	0	0	0
17/03/2004 14:00:00	0	0	0	0	0	0	0	0	0	0	0	0	0
17/03/2004 15:00:00	0	0	0	0	0	0	0	0	0	0	0	0	0
17/03/2004 16:00:00	0	0	0	0	0	0	0	0	0	0	0	0	0
17/03/2004 17:00:00	0	0	0	0	0	0	0	0	0	0	0	0	0
17/03/2004 18:00:00	0	0	0	0	0	0	0	0	0	0	0	0	0
17/03/2004 19:00:00	0	0	0	0	0	0	0	0	0	0	0	0	0
17/03/2004 20:00:00	0	0	0	0	0	0	0	0	0	0	0	0	0
17/03/2004 21:00:00	0	0	0	0	0	0	0	0	0	0	0	0	0
17/03/2004 22:00:00	0	0	0	0	0	0	0	0	0	0	0	0	0
17/03/2004 23:00:00	0	0	0	0	0	0	0	0	0	0	0	0	0
18/03/2004 00:00:00	0	0	0	0	0	0	0	0	0	0	0	0	0
18/03/2004 01:00:00	0	0	0	0	0	0	0	0	0	0	0	0	0
18/03/2004 02:00:00	0	0	0	0	0	0	0	0	0	0	0	0	0
18/03/2004 03:00:00	0	0	0	0	0	0	0	0	0	0	0	0	0
18/03/2004 04:00:00	0	0	0	0	0	0	0	0	0	0	0	0	0
18/03/2004 05:00:00	0	0	0	0	0	0	0	0	0	0	0	0	0
18/03/2004 06:00:00	0	0	0	0	0	0	0	0	0	0	0	0	0
18/03/2004 07:00:00	0	0	0	0	0	0	0	0	0	0	0	0	0
18/03/2004 08:00:00	0	0	0	0	0	0	0	0	0	0	0	0	0
18/03/2004 09:00:00	0	0	0	0	0	0	0	0	0	0	0	0	0
18/03/2004 10:00:00	0	0	0	0	0	0	0	0	0	0	0	0	0
18/03/2004 11:00:00	0	0	0	0	0	0	0	0	0	0	0	0	0
18/03/2004 12:00:00	0	0	0	0	0	0	0	0	0	0	0	0	0
18/03/2004 13:00:00	0	0	0	0	0	0	0	0	0	0	0	0	0
18/03/2004 14:00:00	0	0	0	0	0	0	0	0	0	0	0	0	0
18/03/2004 15:00:00	0	0	0	0	0	0	0	0	0	0	0	0	0
18/03/2004 16:00:00	0	0	0	0	0	0	0	0	0	0	0	0	0
18/03/2004 17:00:00	0	0	0	0	0	0	0	0	0	0	0	0	0
18/03/2004 18:00:00	0	0	0	0	0	0	0	0	0	0	0	0	0
18/03/2004 19:00:00	0	0	0	0	0	0	0	0	0	0	0	0	0
18/03/2004 20:00:00	0	0	0	0	0	0	0	0	0	0	0	0	0
18/03/2004 21:00:00	0	0	0	0	0	0	0	0	0	0	0	0	0
18/03/2004 22:00:00	0	0	0	0	0	0	0	0	0	0	0	0	0
18/03/2004 23:00:00	0	0	0	0	0	0	0	0	0	0	0	0	0
19/03/2004 00:00:00	0	0	0	0	0	0	0	0	0	0	0	0	0
19/03/2004 01:00:00	0	0	0	0	0	0	0	0	0	0	0	0	0
19/03/2004 02:00:00	0	0	0	0	0	0	0	0	0	0	0	0	0
19/03/2004 03:00:00	0	0	0	0	0	0	0	0	0	0	0	0	0
19/03/2004 04:00:00	0	0	0	0	0	0	0	0	0	0	0	0	0
19/03/2004 05:00:00	0	0	0	0	0	0	0	0	0	0	0	0	0
19/03/2004 06:00:00	0	0	0	0	0	0	0	0	0	0	0	0	0
19/03/2004 07:00:00	0	0	0	0	0	0	0	0	0	0	0	0	0
19/03/2004 08:00:00	0	0	0	0	0	0	0	0	0	0	0	0	0
19/03/2004 09:00:00	0	0	0	0	0	0	0	0	0	0	0	0	0
19/03/2004 10:00:00	0	0	0	0	0	0	0	0	0	0	0	0	0
19/03/2004 11:00:00	0	0	0	0	0	0	0	0	0	0	0	0	0
19/03/2004 12:00:00	0	0	0	0	0	0	0	0	0	0	0	0	0
19/03/2004 13:00:00	0	0	0	0	0	0	0	0	0	0	0	0	0
19/03/2004 14:00:00	0	0	0	0	0	0	0	0	0	0	0	0	0
19/03/2004 15:00:00	0	0	0	0	0	0	0	0	0	0	0	0	0
19/03/2004 16:00:00	0	0	0	0	0	0	0	0	0	0	0	0	0
19/03/2004 17:00:00	0	0	0	0	0	0	0	0	0	0	0	0	0
19/03/2004 18:00:00	0	0	0	0	0	0	0	0	0	0	0	0	0
19/03/2004 19:00:00	0	0	0	0	0	0	0	0	0	0	0	0	0
19/03/2004 20:00:00	0	0	0	0	0	0	0	0	0	0	0	0	0
19/03/2004 21:00:00	0	0	0	0	0	0	0	0	0	0	0	0	0
19/03/2004 22:00:00	0	0	0	0	0	0	0	0	0	0	0	0	0
19/03/2004 23:00:00	0	0	0	0	0	0	0	0	0	0	0	0	0
20/03/2004 00:00:00	0	0	0	0	0	0	0	0	0	0	0	0	0
20/03/2004 01:00:00	0	0	0	0	0	0	0	0	0	0	0	0	0
20/03/2004 02:00:00	0	0	0	0	0	0	0	0	0	0	0	0	0
20/03/2004 03:00:00	0	0	0	0	0	0	0	0	0	0	0	0	0
20/03/2004 04:00:00	0	0	0	0	0	0	0	0	0	0	0	0	0
20/03/2004 05:00:00	0	0	0	0	0	0	0	0	0	0	0	0	0
20/03/2004 06:00:00	0	0	0	0	0	0	0	0	0	0	0	0	0
20/03/2004 07:00:00	0	0	0	0	0	0	0	0	0	0	0	0	0
20/03/2004 08:00:00	0	0	0	0	0	0	0	0	0	0	0	0	0
20/03/2004 09:00:00	0	0	0	0	0	0	0	0	0	0	0	0	0
20/03/2004 10:00:00	0	0	0	0	0	0	0	0	0	0	0	0	0
20/03/2004 11:00:00	0	0	0	0	0	0	0	0	0	0	0	0	0
20/03/2004 12:00:00	0	0	0	0	0	0	0	0	0	0	0	0	0
20/03/2004 13:00:00	0	0	0	0	0	0	0	0	0	0	0	0	0
20/03/2004 14:00:00	0	0	0	0	0	0	0	0	0	0	0	0	0
20/03/2004 15:00:00	0	0	0	0	0	0	0	0	0	0	0	0	0
20/03/2004 16:00:00	0	0	0	0	0	0	0	0	0	0	0	0	0
20/03/2004 17:00:00	0	0	0	0	0	0	0	0	0	0	0	0	0
20/03/2004 18:00:00	0	0	0	0	0	0	0	0	0	0	0	0	0
20/03/2004 19:00:00	0	0	0	0	0	0	0	0	0	0	0	0	0
20/03/2004 20:00:00	0	0	0	0	0	0	0	0	0	0	0	0	0
20/03/2004 21:00:00	0	0	0	0	0	0	0	0	0	0	0	0	0
20/03/2004 22:00:00	0	0	0	0	0	0	0	0	0	0	0	0	0
20/03/2004 23:00:00	0	0	0	0	0	0	0	0	0	0	0	0	0
21/03/2004 00:00:00	0	0	0	0	0	0	0	0	0	0	0	0	0
21/03/2004 01:00:00	0	0	0	0	0	0	0	0	0	0	0	0	0
21/03/2004 02:00:00	0	0	0	0	0	0	0	0	0	0	0	0	0
21/03/2004 03:00:00	0	0	0	0	0	0	0	0	0	0	0	0	0
21/03/2004 04:00:00	0	0	0	0	0	0	0	0	0	0	0	0	0
21/03/2004 05:00:00	0	0	0	0	0	0	0	0	0	0	0	0	0
21/03/2004 06:00:00	0	0	0	0	0	0	0	0	0	0	0	0	0
21/03/2004 07:00:00	0	0	0	0	0	0	0	0	0	0	0	0	0
21/03/2004 08:00:00	0	0	0	0	0	0	0	0	0	0	0	0	0
21/03/2004 09:00:00	0	0	0	0	0	0	0	0	0	0	0	0	0
21/03/2004 10:00:00	0	0	0	0	0	0	0	0	0	0	0	0	0
21/03/2004 11:00:00	0	0	0	0	0	0	0	0	0	0	0	0	0
21/03/2004 12:00:00	0	0	0	0	0	0	0	0	0	0	0	0	0
21/03/2004 13:00:00	0	0	0	0	0	0	0	0	0	0	0	0	0
21/03/2004 14:00:00	0	0	0	0	0	0	0	0	0	0	0	0	0
21/03/2004 15:00:00	0	0	0	0	0	0	0	0	0	0	0	0	0
21/03/2004 16:00:00	0	0	0	0	0	0	0	0	0	0	0	0	0
21/03/2004 17:00:00	0	0	0	0	0	0	0	0	0	0	0	0	0
21/03/2004 18:00:00	0	0	0	0	0	0	0	0	0	0	0	0	0
21/03/2004 19:00:00	0	0	0	0	0	0	0	0	0	0	0	0	0
21/03/2004 20:00:00	0	0	0	0	0	0	0	0	0	0	0	0	0
21/03/2004 21:00:00	0	0	0	0	0	0	0	0	0	0	0	0	0
21/03/2004 22:00:00	0	0	0	0	0	0	0	0	0	0	0	0	0
21/03/2004 23:00:00	0	0	0	0	0	0	0	0	0	0	0	0	0
22/03/2004 00:00:00	0	0	0	0	0	0	0	0	0	0	0	0	0
22/03/2004 01:00:00	0	0	0	0	0	0	0	0	0	0	0	0	0
22/03/2004 02:00:00	0	0	0	0	0	0	0	0	0	0	0	0	0
22/03/2004 03:00:00	0	0	0	0	0	0	0	0	0	0	0	0	0
22/03/2004 04:00:00	0	0	0	0	0	0	0	0	0	0	0	0	0
22/03/2004 05:00:00	0	0	0	0	0	0	0	0	0	0	0	0	0
22/03/2004 06:00:00	0	0	0	0	0	0	0	0	0	0	0	0	0
22/03/2004 07:00:00	0	0	0	0	0	0	0	0	0	0	0	0	0
22/03/2004 08:00:00	0	0	0	0	0	0	0	0	0	0	0	0	0
22/03/2004 09:00:00	0	0	0	0	0	0	0	0	0	0	0	0	0
22/03/2004 10:00:00	0	0	0	0	0	0	0	0	0	0	0	0	0
22/03/2004 11:00:00	0	0	0	0	0	0	0	0	0	0	0	0	0
22/03/2004 12:00:00	0	0	0	0	0	0	0	0	0	0	0	0	0
22/03/2004 13:00:00	0	0	0	0	0	0	0	0	0	0	0	0	0
22/03/2004 14:00:00	0	0	0	0	0	0	0	0	0	0	0	0	0
22/03/2004 15:00:00	0	0	0	0	0	0	0	0	0	0	0	0	0
22/03/2004 16:00:00	0	0	0	0	0	0	0	0	0	0	0	0	0
22/03/2004 17:00:00	0	0	0	0	0	0	0	0	0	0	0	0	0
22/03/2004 18:00:00	0	0	0	0	0	0	0	0	0	0	0	0	0
22/03/2004 19:00:00	0	0	0	0	0	0	0	0	0	0	0	0	0
22/03/2004 20:00:00	0	0	0	0	0	0	0	0	0	0	0	0	0
22/03/2004 21:00:00	0	0	0	0	0	0	0	0	0	0	0	0	0
22/03/2004 22:00:00	0	0	0	0	0	0	0	0	0	0	0	0	0
22/03/2004 23:00:00	0	0	0	0	0	0	0	0	0	0	0	0	0
23/03/2004 00:00:00	0	0	0	0	0	0	0	0	0	0	0	0	0
23/03/2004 01:00:00	0	0	0	0	0	0	0	0	0	0	0	0	0
23/03/2004 02:00:00	0	0	0	0	0	0	0	0	0	0	0	0	0
23/03/2004 03:00:00	0	0	0	0	0	0	0	0	0	0	0	0	0
23/03/2004 04:00:00	0	0	0	0	0	0	0	0	0	0	0	0	0
23/03/2004 05:00:00	0	0	0	0	0	0	0	0	0	0	0	0	0
23/03/2004 06:00:00	0	0	0	0	0	0	0	0	0	0	0	0	0
23/03/2004 07:00:00	0	0	0	0	0	0	0	0	0	0	0	0	0
23/03/2004 08:00:00	0	0	0	0	0	0	0	0	0	0	0	0	0
23/03/2004 09:00:00	0	0	0	0	0	0	0	0	0	0	0	0	0
23/03/2004 10:00:00	0	0	0	0	0	0	0	0	0	0	0	0	0
23/03/2004 11:00:00	0	0	0	0	0	0	0	0	0	0	0	0	0
23/03/2004 12:00:00	0	0	0	0	0	0	0	0	0	0	0	0	0
23/03/2004 13:00:00	0	0	0	0	0	0	0	0	0	0	0	0	0
23/03/2004 14:00:00	0	0	0	0	0	0	0	0	0	0	0	0	0
23/03/2004 15:00:00	0	0	0	0	0	0	0	0	0	0	0	0	0
23/03/2004 16:00:00	0	0	0	0	0	0	0	0	0	0	0	0	0
23/03/2004 17:00:00	0	0	0	0	0	0	0	0	0	0	0	0	0
23/03/2004 18:00:00	0	0	0	0	0	0	0	0	0	0	0	0	0
23/03/2004 19:00:00	0	0	0	0	0	0	0	0	0	0	0	0	0
23/03/2004 20:00:00	0	0	0	0	0	0	0	0	0	0	0	0	0
23/03/2004 21:00:00	0	0	0	0	0	0	0	0	0	0	0	0	0
23/03/2004 22:00:00	0	0	0	0	0	0	0	0	0	0	0	0	0
23/03/2004 23:00:00	0	0	0	0	0	0	0	0	0	0	0	0	0
24/03/2004 00:00:00	0	0	0	0	0	0	0	0	0	0	0	0	0
24/03/2004 01:00:00	0	0	0	0	0	0	0	0	0	0	0	0	0
24/03/2004 02:00:00	0	0	0	0	0	0	0	0	0	0	0	0	0
24/03/2004 03:00:00	0	0	0	0	0	0	0	0	0	0	0	0	0
24/03/2004 04:00:00	0	0	0	0	0	0	0	0	0	0	0	0	0
24/03/2004 05:00:00	0	0	0	0	0	0	0	0	0	0	0	0	0
24/03/2004 06:00:00	0	0	0	0	0	0	0	0	0	0	0	0	0
[truncated: 6,785 more rows]
