# Supplementary material for: Flood Prediction in Ungauged Basins by Physical-Based TOPKAPI Model
Source: Hindawi journal article supplement (doi:10.1155/2019/4795853), 2019-09-05
Supplement: f1 [file 4795853.f1.zip › 4795853.f1/xxTmonth_2004.csv]

NAME		ID	X	Y	Z	JAN	FEB	MAR	APR	MAY	JUN	JUL	AUG	SEP	OCT	NOV	DEC
ZhuMaDian		57290	176462.543	3607971.94	82.7	2.7	8.7	11	18.2	22.1	25.6	27.9	24.4	21.5	15.4	10.9	3.2
XinYang		57297	219676.193	3552774.812	114.5	2.6	9.4	11.4	18.8	21.8	24.4	28.2	24.4	21.6	15.4	11.6	4.2
